# Supplementary material
Source: ML conference proceedings conference paper supplement (https://openreview.net/forum?id=2rAiDBJgR_)
Supplement: supplementary_material [file attachment]

## Sheet: GS_MaleOpt
	time	SEq	Bal	Reg	Egal
0	0.0004042	1905	2202	85	2499
1	0.0004282	1660	2025	78	2390
2	0.0003943	1546	1944	94	2342
3	0.0003757	2044	2315	91	2586
4	0.000453	1412	1789	59	2166
5	0.0003793	1260	1669	86	2078
6	0.0003969	1613	2009	84	2405
7	0.0004477	1814	2137	96	2460
8	0.0004111	1166	1653	86	2140
9	0.0003984	1704	2076	83	2448
10	0.0004559	1680	2012	89	2344
11	0.0003721	1785	2099	97	2413
12	0.0003896	1183	1572	95	1961
13	0.0004409	1297	1731	94	2165
14	0.0003865	1284	1662	98	2040
15	0.0003891	1618	2008	78	2398
16	0.0003698	1901	2211	76	2521
17	0.0003926	1347	1747	89	2147
18	0.000356	2430	2725	95	3020
19	0.000415	1814	2162	93	2510
20	0.0003709	1724	2000	83	2276
21	0.0003398	1850	2168	94	2486
22	0.0003989	1440	1890	73	2340
23	0.0004068	1518	1917	83	2316
24	0.0003994	1485	1878	82	2271
25	0.0003611	1919	2185	91	2451
26	0.0003643	2416	2647	97	2878
27	0.0003884	1871	2231	89	2591
28	0.0003953	1448	1830	78	2212
29	0.0003986	1479	1850	74	2221
30	0.0003906	1331	1725	83	2119
31	0.0004048	1519	1896	83	2273
32	0.0004038	1160	1595	84	2030
33	0.00034	1984	2263	99	2542
34	0.0004367	974	1446	75	1918
35	0.0004485	619	1207	60	1795
36	0.0004243	1212	1743	95	2274
37	0.0003961	1217	1621	60	2025
38	0.0003941	1470	1873	98	2276
39	0.0004405	1393	1887	76	2381
40	0.0004178	1113	1613	94	2113
41	0.0003585	1553	1882	98	2211
42	0.0003806	1476	1871	73	2266
43	0.0003877	1482	1846	82	2210
44	0.0003971	1711	2109	94	2507
45	0.0003273	2195	2455	93	2715
46	0.0003797	1691	2056	91	2421
47	0.0004164	1683	2082	97	2481
48	0.0003635	1568	1901	94	2234
49	0.0004472	880	1383	99	1886
50	0.0004737	1657	2001	85	2345
51	0.0004204	1644	2041	99	2438
52	0.0004104	1258	1614	68	1970
53	0.0004749	1481	1824	88	2167
54	0.000387	1883	2163	99	2443
55	0.0004396	1568	1942	94	2316
56	0.0004081	1999	2270	96	2541
57	0.0004629	1412	1850	91	2288
58	0.0004244	1656	1974	91	2292
59	0.0005486	1140	1591	95	2042
60	0.0004167	1061	1539	66	2017
61	0.0004661	406	1065	50	1724
62	0.000443	1338	1758	84	2178
63	0.0004434	1401	1842	80	2283
64	0.0004409	895	1469	70	2043
65	0.0004801	1193	1650	71	2107
66	0.0004197	1601	1945	86	2289
67	0.0004134	1459	1835	70	2211
68	0.0004778	568	1208	91	1848
69	0.0004024	2095	2352	84	2609
70	0.0004447	1892	2285	91	2678
71	0.0003921	1619	1972	93	2325
72	0.0004153	1373	1740	93	2107
73	0.00046	1834	2240	85	2646
74	0.0004418	1617	1976	91	2335
75	0.0003655	2146	2393	88	2640
76	0.0004158	2201	2470	94	2739
77	0.0003777	2033	2299	97	2565
78	0.0004604	1571	1983	79	2395
79	0.0004679	1871	2211	80	2551
80	0.0004077	1724	2141	74	2558
81	0.0005291	2097	2416	96	2735
82	0.000435	2003	2334	93	2665
83	0.0004007	1454	1866	93	2278
84	0.0004891	696	1338	74	1980
85	0.0004174	1593	1970	96	2347
86	0.0004689	2196	2490	95	2784
87	0.0004024	1808	2129	90	2450
88	0.0004834	827	1435	83	2043
89	0.0004589	1105	1584	67	2063
90	0.0004626	1398	1809	81	2220
91	0.0004364	2336	2634	99	2932
92	0.0004713	1276	1739	69	2202
93	0.0004533	871	1354	60	1837
94	0.0003895	1905	2163	87	2421
95	0.0004043	1989	2264	96	2539
96	0.0003833	2244	2489	98	2734
97	0.0004275	1515	1846	81	2177
98	0.0004798	1810	2132	97	2454
99	0.0004743	380	1054	49	1728
100	0.0004265	1884	2223	93	2562
101	0.0004546	1139	1603	80	2067
102	0.0004549	1884	2226	88	2568
103	0.0004176	1462	1924	97	2386
104	0.0003939	2001	2231	91	2461
105	0.000456	1642	1964	86	2286
106	0.0004914	1033	1511	64	1989
107	0.0004882	1529	1905	92	2281
108	0.0003703	1935	2231	94	2527
109	0.0003848	1990	2274	96	2558
110	0.0004259	993	1477	77	1961
111	0.0004365	1559	1948	89	2337
112	0.0005187	996	1501	76	2006
113	0.0005251	311	985	73	1659
114	0.0004369	857	1383	64	1909
115	0.0003798	2035	2354	91	2673
116	0.0005539	1681	2014	97	2347
117	0.000424	1642	1992	84	2342
118	0.0004511	1363	1794	74	2225
119	0.0003649	2644	2913	97	3182
120	0.0003781	2349	2611	88	2873
121	0.0004123	1982	2293	97	2604
122	0.0005283	791	1290	71	1789
123	0.0003602	2037	2293	84	2549
124	0.0003859	2199	2486	95	2773
125	0.0005807	294	1080	77	1866
126	0.0003915	1795	2128	93	2461
127	0.0003754	2300	2536	93	2772
128	0.0004495	799	1321	97	1843
129	0.0005354	1231	1723	74	2215
130	0.0003807	1910	2206	91	2502
131	0.0004721	771	1330	85	1889
132	0.000403	2178	2442	97	2706
133	0.0004401	1561	1932	67	2303
134	0.0004767	1738	2082	97	2426
135	0.0005664	1336	1791	87	2246
136	0.0004372	1085	1543	90	2001
137	0.0004548	1522	1877	95	2232
138	0.000429	1878	2244	95	2610
139	0.0004713	1333	1772	88	2211
140	0.0004306	1652	2027	97	2402
141	0.0005187	544	1157	53	1770
142	0.0005318	765	1374	51	1983
143	0.0004226	1250	1694	68	2138
144	0.0004177	1907	2195	96	2483
145	0.0004367	1469	1856	76	2243
146	0.0004469	2063	2354	93	2645
147	0.0004562	1153	1651	86	2149
148	0.0004022	1487	1872	86	2257
149	0.0004051	1947	2268	78	2589
150	0.0003853	2478	2697	82	2916
151	0.0004267	1538	1897	92	2256
152	0.0003605	1889	2192	87	2495
153	0.0004537	1223	1649	79	2075
154	0.0004386	1368	1734	66	2100
155	0.0004924	1927	2248	98	2569
156	0.0003724	2117	2427	97	2737
157	0.0004346	1302	1738	97	2174
158	0.0004513	1025	1417	85	1809
159	0.0004678	1365	1805	75	2245
160	0.0004117	2097	2405	97	2713
161	0.0004478	918	1399	81	1880
162	0.00046	1471	1903	71	2335
163	0.0004393	1592	1964	96	2336
164	0.0004625	597	1194	40	1791
165	0.0005706	1037	1506	81	1975
166	0.0004159	1142	1575	62	2008
167	0.0004072	1075	1500	73	1925
168	0.0003765	1930	2226	91	2522
169	0.0004316	1659	2072	64	2485
170	0.0004465	1709	2114	96	2519
171	0.000466	1706	2148	69	2590
172	0.0004751	1190	1621	85	2052
173	0.0004752	895	1380	58	1865
174	0.000442	1574	2014	98	2454
175	0.0004618	611	1146	42	1681
176	0.0004204	1738	2037	77	2336
177	0.0004518	1718	2085	94	2452
178	0.0004006	1876	2175	90	2474
179	0.0004516	1222	1637	67	2052
180	0.0005152	929	1491	77	2053
181	0.000447	1598	1961	98	2324
182	0.000445	740	1257	61	1774
183	0.0004411	1455	1880	90	2305
184	0.0004436	1070	1536	91	2002
185	0.0004398	1725	2117	84	2509
186	0.0004201	1336	1741	93	2146
187	0.0004238	2288	2616	90	2944
188	0.0003823	2637	2869	97	3101
189	0.000386	1794	2118	83	2442
190	0.0004409	1261	1761	82	2261
191	0.0004815	352	1015	90	1678
192	0.000439	1445	1831	97	2217
193	0.0005279	1465	1870	94	2275
194	0.000473	751	1338	84	1925
195	0.0004805	1010	1510	94	2010
196	0.0003975	1853	2163	96	2473
197	0.0003888	1807	2122	83	2437
198	0.0004691	1269	1697	98	2125
199	0.0004521	992	1456	85	1920
200	0.0004648	1031	1523	84	2015
201	0.0004458	975	1470	88	1965
202	0.0004224	1644	1987	90	2330
203	0.0004325	1563	1937	81	2311
204	0.0003845	2054	2358	94	2662
205	0.0004713	615	1219	57	1823
206	0.0004415	1571	1910	78	2249
207	0.0004072	1719	2044	76	2369
208	0.0004112	1437	1741	95	2045
209	0.0004156	1544	1897	79	2250
210	0.0004325	1888	2245	90	2602
211	0.0004707	1479	1907	85	2335
212	0.0003782	2165	2454	84	2743
213	0.0003878	1564	1888	65	2212
214	0.0004159	1683	2072	84	2461
215	0.0004383	1829	2104	85	2379
216	0.0004877	748	1372	57	1996
217	0.0004611	529	1163	71	1797
218	0.0004123	1737	2069	92	2401
219	0.0004504	1484	1887	67	2290
220	0.0007507	2626	2850	93	3074
221	0.0004696	778	1344	64	1910
222	0.0004232	1941	2299	81	2657
223	0.0004518	1292	1723	59	2154
224	0.000396	1746	2078	98	2410
225	0.0003431	2461	2675	99	2889
226	0.0004614	1628	1975	76	2322
227	0.0004442	1914	2267	81	2620
228	0.0004099	2025	2314	97	2603
229	0.0004583	1040	1545	93	2050
230	0.0003537	2173	2432	84	2691
231	0.0004795	1319	1818	97	2317
232	0.000345	2163	2407	97	2651
233	0.0003837	2009	2289	94	2569
234	0.0004128	2119	2436	78	2753
235	0.0003932	2018	2296	99	2574
236	0.0004698	1620	1983	89	2346
237	0.000454	1456	1850	99	2244
238	0.0004587	2190	2494	96	2798
239	0.0004913	978	1529	76	2080
240	0.0004183	1095	1545	54	1995
241	0.0004315	1427	1886	83	2345
242	0.0004563	2348	2611	89	2874
243	0.0004674	1728	2084	89	2440
244	0.0004079	2090	2390	78	2690
245	0.0004032	1690	1999	73	2308
246	0.0004555	1674	2020	98	2366
247	0.0004142	1305	1728	64	2151
248	0.0004049	1230	1645	73	2060
249	0.0004255	1704	2028	69	2352
250	0.000415	1827	2156	99	2485
251	0.0003819	1757	2097	87	2437
252	0.0004527	1320	1773	95	2226
253	0.0004152	1962	2241	93	2520
254	0.0004492	1345	1713	94	2081
255	0.0004009	2241	2548	99	2855
256	0.0004091	1573	1897	80	2221
257	0.0004215	1800	2143	95	2486
258	0.0004596	1263	1726	88	2189
259	0.0003649	2364	2664	83	2964
260	0.0004093	1777	2116	98	2455
261	0.0004133	1537	1882	94	2227
262	0.0003983	1944	2254	97	2564
263	0.0004972	720	1383	88	2046
264	0.00048	1339	1802	91	2265
265	0.0004182	1621	1991	91	2361
266	0.0004492	921	1393	55	1865
267	0.0004141	1988	2272	85	2556
268	0.0005159	416	1116	58	1816
269	0.0003872	2088	2390	92	2692
270	0.0003728	1652	1946	78	2240
271	0.0003919	2061	2310	98	2559
272	0.0004108	1632	1972	74	2312
273	0.0004567	1713	2106	99	2499
274	0.0004468	1423	1780	99	2137
275	0.0004191	1683	2021	98	2359
276	0.0004532	1279	1746	90	2213
277	0.0004065	2177	2510	95	2843
278	0.0004473	487	1109	91	1731
279	0.0004229	1381	1718	87	2055
280	0.0004474	1700	2035	77	2370
281	0.0004988	538	1199	42	1860
282	0.0005557	1651	2031	95	2411
283	0.0004425	1400	1787	88	2174
284	0.0003654	2126	2402	92	2678
285	0.000414	1438	1838	96	2238
286	0.0005051	461	1254	77	2047
287	0.000441	1566	1943	69	2320
288	0.000461	977	1476	68	1975
289	0.000461	1207	1610	57	2013
290	0.0003956	1994	2307	95	2620
291	0.0004657	1095	1637	98	2179
292	0.000441	1431	1821	91	2211
293	0.0005794	680	1270	61	1860
294	0.0004199	1898	2143	93	2388
295	0.0003891	1823	2146	78	2469
296	0.0004803	1303	1693	87	2083
297	0.0004427	1374	1781	89	2188
298	0.0003748	2248	2491	88	2734
299	0.0004045	2386	2634	86	2882
300	0.0004256	1545	1915	93	2285
301	0.0004137	1939	2207	89	2475
302	0.0004987	1320	1782	74	2244
303	0.0004213	1187	1638	81	2089
304	0.0005101	702	1287	77	1872
305	0.0003506	2578	2805	95	3032
306	0.0004732	1071	1578	79	2085
307	0.0003919	2357	2589	99	2821
308	0.000499	374	1073	51	1772
309	0.000406	2367	2660	97	2953
310	0.0003939	1849	2183	89	2517
311	0.0003317	2364	2578	98	2792
312	0.0003857	2121	2367	95	2613
313	0.0004417	1462	1904	96	2346
314	0.0005069	601	1315	74	2029
315	0.000389	1711	2041	98	2371
316	0.0005476	1896	2210	99	2524
317	0.0004206	1517	1855	74	2193
318	0.0004118	2085	2343	99	2601
319	0.0003638	1768	2066	92	2364
320	0.0004372	1468	1845	80	2222
321	0.0005688	1905	2181	93	2457
322	0.00047	1253	1687	61	2121
323	0.0003826	1866	2141	92	2416
324	0.0004096	1448	1899	69	2350
325	0.0004374	1023	1505	66	1987
326	0.0004438	1360	1772	74	2184
327	0.0003861	1988	2257	99	2526
328	0.0004469	2000	2272	95	2544
329	0.000462	573	1244	65	1915
330	0.0004436	1785	2146	93	2507
331	0.000452	1315	1763	92	2211
332	0.0004762	1215	1653	83	2091
333	0.0005147	1486	1909	69	2332
334	0.0004586	1575	1988	93	2401
335	0.0003734	1941	2223	92	2505
336	0.0004017	1954	2239	95	2524
337	0.0005046	1188	1632	73	2076
338	0.0004285	1691	2047	80	2403
339	0.0004801	713	1265	67	1817
340	0.0004531	1010	1460	53	1910
341	0.0003841	2538	2765	96	2992
342	0.0004325	2419	2640	89	2861
343	0.0004938	540	1206	77	1872
344	0.0003853	1899	2182	99	2465
345	0.000458	1795	2156	85	2517
346	0.0003967	1923	2215	98	2507
347	0.0003481	2174	2418	99	2662
348	0.0004197	2397	2650	94	2903
349	0.000399	2239	2510	91	2781
350	0.000429	1500	1872	79	2244
351	0.0004055	1883	2226	93	2569
352	0.0003968	1592	1946	94	2300
353	0.0003372	2563	2782	80	3001
354	0.0004004	1915	2210	99	2505
355	0.0004186	1957	2272	94	2587
356	0.0004523	868	1415	58	1962
357	0.0004984	1148	1557	62	1966
358	0.0003944	1480	1851	81	2222
359	0.0004643	968	1490	86	2012
360	0.0004798	1503	1940	92	2377
361	0.0004269	1354	1740	76	2126
362	0.0003563	2577	2830	99	3083
363	0.0004494	1844	2149	92	2454
364	0.0004303	1863	2176	87	2489
365	0.0003944	1579	1924	98	2269
366	0.0003975	1376	1711	81	2046
367	0.0003664	2178	2444	99	2710
368	0.0004151	1931	2252	84	2573
369	0.0004626	1345	1768	95	2191
370	0.0004357	2128	2405	78	2682
371	0.0003903	2000	2294	79	2588
372	0.0004286	1121	1600	70	2079
373	0.0005091	83	916	37	1749
374	0.0004305	2484	2764	93	3044
375	0.0004557	785	1344	75	1903
376	0.0004407	1103	1508	85	1913
377	0.0004839	741	1343	69	1945
378	0.0004319	1472	1860	94	2248
379	0.0004113	1411	1836	85	2261
380	0.0005036	1728	2065	96	2402
381	0.0004857	486	1252	69	2018
382	0.0004433	1445	1822	73	2199
383	0.0004112	1516	1897	79	2278
384	0.00053	742	1374	80	2006
385	0.0005058	1602	2038	85	2474
386	0.0005289	363	1093	55	1823
387	0.0004479	2313	2601	99	2889
388	0.0003889	1604	1909	93	2214
389	0.0004808	1094	1549	90	2004
390	0.0004353	1247	1698	74	2149
391	0.0003481	2266	2512	99	2758
392	0.0003466	2031	2289	93	2547
393	0.0004263	1979	2269	87	2559
394	0.000402	1389	1794	89	2199
395	0.0003731	1957	2241	88	2525
396	0.0004187	2121	2421	87	2721
397	0.0004906	386	1151	75	1916
398	0.0004501	1512	1913	74	2314
399	0.0004356	1474	1856	83	2238
400	0.0004145	1768	2085	94	2402
401	0.0003832	2118	2385	95	2652
402	0.0004032	1488	1882	77	2276
403	0.0004283	2214	2513	97	2812
404	0.0004364	1692	2071	91	2450
405	0.0004235	1226	1630	78	2034
406	0.0004105	2137	2436	99	2735
407	0.0004153	1645	2031	94	2417
408	0.0004453	2347	2604	97	2861
409	0.0005957	813	1415	70	2017
410	0.0004001	1288	1709	80	2130
411	0.0004349	1286	1698	99	2110
412	0.0004649	1126	1589	78	2052
413	0.0004811	1007	1512	98	2017
414	0.0004104	1766	2121	99	2476
415	0.0004813	1236	1624	78	2012
416	0.0004497	985	1493	62	2001
417	0.0004241	1374	1726	90	2078
418	0.000467	1328	1773	83	2218
419	0.0004734	636	1221	55	1806
420	0.0004696	565	1195	64	1825
421	0.0004699	755	1377	94	1999
422	0.0004106	1445	1786	94	2127
423	0.0004563	1567	1960	99	2353
424	0.0004786	1543	1906	82	2269
425	0.0004241	1710	2059	95	2408
426	0.0004403	1332	1754	97	2176
427	0.0004292	1171	1605	71	2039
428	0.0004855	936	1433	75	1930
429	0.0004533	1314	1808	71	2302
430	0.0004005	1617	1949	98	2281
431	0.0004261	2258	2516	96	2774
432	0.0003951	1406	1784	81	2162
433	0.0004326	1312	1731	76	2150
434	0.0004533	743	1368	99	1993
435	0.0004559	2137	2469	92	2801
436	0.0005107	1446	1942	77	2438
437	0.0004323	1134	1616	85	2098
438	0.0004231	1578	1963	72	2348
439	0.0004153	1731	2119	91	2507
440	0.0004185	1561	1936	92	2311
441	0.0005655	1423	1780	97	2137
442	0.0005134	258	961	57	1664
443	0.0003717	2611	2875	94	3139
444	0.0005925	1266	1632	71	1998
445	0.0003943	1515	1846	96	2177
446	0.0004775	1588	1998	96	2408
447	0.000389	1785	2127	99	2469
448	0.0004188	1148	1619	82	2090
449	0.0004102	1268	1659	95	2050
450	0.0005143	1753	2088	98	2423
451	0.0004447	1403	1818	83	2233
452	0.000483	1939	2248	93	2557
453	0.0003887	2002	2268	81	2534
454	0.0003576	1978	2272	93	2566
455	0.000442	1467	1896	81	2325
456	0.0003608	2655	2870	95	3085
457	0.0003636	2204	2480	93	2756
458	0.0004389	1481	1950	91	2419
459	0.0003869	2114	2402	90	2690
460	0.0004073	2089	2389	96	2689
461	0.0004406	1499	1922	88	2345
462	0.0003801	1933	2212	89	2491
463	0.0004514	1101	1482	92	1863
464	0.0003627	1920	2209	97	2498
465	0.0004683	980	1485	86	1990
466	0.0003797	1840	2111	99	2382
467	0.0004233	1338	1711	83	2084
468	0.0004578	1208	1745	97	2282
469	0.0005169	481	1127	49	1773
470	0.0003755	1955	2228	76	2501
471	0.0003576	3253	3443	96	3633
472	0.0004406	1368	1793	98	2218
473	0.0004464	1029	1516	65	2003
474	0.0005048	1147	1557	71	1967
475	0.0003892	2003	2251	96	2499
476	0.0005095	934	1473	82	2012
477	0.0004832	1316	1690	77	2064
478	0.0003492	2191	2456	99	2721
479	0.0003796	2098	2409	81	2720
480	0.0004244	1374	1814	85	2254
481	0.0003907	2268	2583	92	2898
482	0.0003741	2139	2409	97	2679
483	0.0005013	2129	2437	76	2745
484	0.0004602	1442	1865	88	2288
485	0.0003915	1320	1691	86	2062
486	0.0004318	1970	2281	81	2592
487	0.0004485	977	1547	79	2117
488	0.000442	1187	1656	96	2125
489	0.0003593	2156	2442	99	2728
490	0.0004336	1459	1856	96	2253
491	0.0004687	1730	2101	98	2472
492	0.0003531	2438	2696	97	2954
493	0.0004596	1308	1727	66	2146
494	0.000427	1712	2007	95	2302
495	0.0004425	1110	1606	91	2102
496	0.0004463	1679	2053	89	2427
497	0.0005403	1639	2060	84	2481
498	0.0004172	1718	2071	84	2424
499	0.0004314	1144	1600	98	2056
500	0.0004178	1348	1724	83	2100
501	0.0003926	1741	2086	89	2431
502	0.0003678	2095	2354	90	2613
503	0.0003667	2181	2461	93	2741
504	0.0003723	1800	2067	78	2334
505	0.0004471	1442	1882	81	2322
506	0.0004176	1797	2123	85	2449
507	0.0004851	1170	1653	78	2136
508	0.0004499	1653	2039	76	2425
509	0.0004221	1678	2068	78	2458
510	0.0004609	977	1470	57	1963
511	0.0004421	1223	1692	69	2161
512	0.0003976	2530	2761	88	2992
513	0.0003923	1362	1767	81	2172
514	0.0004219	1324	1727	89	2130
515	0.0004446	1722	2112	83	2502
516	0.0004592	1284	1780	73	2276
517	0.0004496	696	1260	73	1824
518	0.0004866	1711	2088	88	2465
519	0.0003788	2183	2432	98	2681
520	0.0004493	1154	1664	71	2174
521	0.0004437	1169	1633	90	2097
522	0.0005248	2227	2504	97	2781
523	0.0004281	1681	2017	82	2353
524	0.0003657	2794	3000	99	3206
525	0.0004294	1816	2174	96	2532
526	0.0003932	1810	2139	95	2468
527	0.0004763	846	1371	58	1896
528	0.0004908	568	1164	75	1760
529	0.0004406	1563	1928	79	2293
530	0.0004243	1554	1921	87	2288
531	0.000559	422	1110	72	1798
532	0.000449	1403	1842	88	2281
533	0.0006403	1519	1869	71	2219
534	0.000435	1433	1855	98	2277
535	0.0005093	1210	1695	77	2180
536	0.0004806	1804	2113	82	2422
537	0.0003689	1996	2277	83	2558
538	0.0004518	709	1288	93	1867
539	0.0004607	1475	1869	96	2263
540	0.0003547	1900	2166	85	2432
541	0.0004208	1732	2065	82	2398
542	0.0004115	2015	2318	91	2621
543	0.0004269	1559	1951	97	2343
544	0.0003988	1921	2192	71	2463
545	0.0004209	1751	2089	99	2427
546	0.000461	1064	1578	93	2092
547	0.0004597	1654	2075	89	2496
548	0.0004655	1826	2200	78	2574
549	0.0003491	2617	2839	98	3061
550	0.000456	1406	1832	98	2258
551	0.0003758	1917	2221	90	2525
552	0.0005155	1062	1576	92	2090
553	0.0005304	1403	1810	70	2217
554	0.0004604	1262	1692	88	2122
555	0.0004293	1642	2036	90	2430
556	0.0004092	1297	1666	92	2035
557	0.0003866	1957	2279	93	2601
558	0.0004163	1710	2112	84	2514
559	0.000441	1122	1585	65	2048
560	0.0003879	1702	1972	99	2242
561	0.0004244	1667	2084	94	2501
562	0.0004102	1806	2146	83	2486
563	0.0004215	1394	1791	80	2188
564	0.0004599	1154	1575	80	1996
565	0.0003689	2439	2658	89	2877
566	0.0003917	1823	2093	92	2363
567	0.0004275	2043	2356	92	2669
568	0.0004253	2124	2423	94	2722
569	0.0004628	1479	1913	93	2347
570	0.0004308	1747	2111	89	2475
571	0.0003431	2512	2746	99	2980
572	0.0004344	1267	1663	92	2059
573	0.0004259	2062	2372	97	2682
574	0.0004471	718	1238	94	1758
575	0.0004526	787	1366	79	1945
576	0.0005338	749	1279	88	1809
577	0.0004217	1675	2012	80	2349
578	0.000427	1837	2219	86	2601
579	0.0003449	2529	2739	93	2949
580	0.0004348	1842	2194	90	2546
581	0.0004619	1304	1697	98	2090
582	0.000461	919	1466	59	2013
583	0.0004501	1214	1658	62	2102
584	0.0004535	1832	2149	80	2466
585	0.0004074	1399	1780	87	2161
586	0.0004313	1331	1781	86	2231
587	0.0004448	1793	2207	90	2621
588	0.000458	1449	1910	81	2371
589	0.0005616	189	1023	83	1857
590	0.0004441	1681	2097	93	2513
591	0.0004481	1475	1879	95	2283
592	0.0003948	1677	2029	81	2381
593	0.0004742	1384	1791	83	2198
594	0.0004324	2076	2396	99	2716
595	0.0004725	1157	1636	75	2115
596	0.0004549	1229	1637	81	2045
597	0.0003789	1885	2203	89	2521
598	0.0005156	1404	1835	93	2266
599	0.000473	947	1440	89	1933
600	0.0004265	1918	2290	90	2662
601	0.0003688	2256	2498	90	2740
602	0.0004555	2120	2429	95	2738
603	0.0004763	1231	1687	88	2143
604	0.0003834	2224	2473	95	2722
605	0.0004423	1378	1795	90	2212
606	0.0003667	2160	2431	88	2702
607	0.0004977	1199	1635	99	2071
608	0.000372	1766	2098	79	2430
609	0.0004566	1047	1587	85	2127
610	0.0004717	2480	2678	97	2876
611	0.0003807	2301	2563	98	2825
612	0.0005003	1570	1960	96	2350
613	0.0003808	1943	2246	90	2549
614	0.000386	1946	2164	82	2382
615	0.0004204	1869	2207	97	2545
616	0.0003879	1441	1772	90	2103
617	0.0004473	1175	1650	92	2125
618	0.0004332	1172	1565	71	1958
619	0.0006003	656	1288	68	1920
620	0.0004119	1164	1606	77	2048
621	0.0003802	1611	1926	80	2241
622	0.0004274	1786	2115	97	2444
623	0.0003858	1790	2125	99	2460
624	0.0003997	1657	2031	84	2405
625	0.0004707	671	1284	98	1897
626	0.0004425	2015	2260	92	2505
627	0.000464	1322	1690	86	2058
628	0.000429	1896	2235	86	2574
629	0.0003911	1899	2181	74	2463
630	0.0005	1071	1507	89	1943
631	0.0005442	62	879	79	1696
632	0.0004266	1535	1956	75	2377
633	0.0005059	1137	1710	86	2283
634	0.0004262	1940	2302	85	2664
635	0.0004426	1377	1746	73	2115
636	0.000459	1580	1948	76	2316
637	0.000393	2219	2520	87	2821
638	0.0004755	617	1269	99	1921
639	0.0004611	632	1181	49	1730
640	0.0004494	2035	2369	81	2703
641	0.0004268	1794	2132	76	2470
642	0.000428	1186	1640	80	2094
643	0.0004291	2074	2393	87	2712
644	0.0004219	1523	1876	86	2229
645	0.0004721	1591	1992	95	2393
646	0.0004024	2871	3081	96	3291
647	0.0004254	1510	1892	89	2274
648	0.0004739	1098	1600	66	2102
649	0.000464	955	1489	89	2023
650	0.0005058	1107	1588	97	2069
651	0.0004456	1520	1938	76	2356
652	0.0003599	2561	2784	99	3007
653	0.0004582	635	1171	69	1707
654	0.0004131	1791	2172	95	2553
655	0.0004021	1863	2197	94	2531
656	0.000391	1923	2220	97	2517
657	0.0004095	1314	1696	94	2078
658	0.0004787	968	1486	63	2004
659	0.0004816	978	1502	77	2026
660	0.0004346	1451	1810	81	2169
661	0.0004241	1133	1611	81	2089
662	0.0004183	1890	2260	87	2630
663	0.0003894	1983	2229	99	2475
664	0.0004771	1249	1635	82	2021
665	0.000451	1118	1584	65	2050
666	0.0004375	2037	2345	94	2653
667	0.000425	1385	1757	84	2129
668	0.0004302	2190	2504	98	2818
669	0.0004287	1509	1894	90	2279
670	0.0004321	1679	2026	95	2373
671	0.0004541	1128	1662	98	2196
672	0.0003795	1768	2098	97	2428
673	0.0004177	1441	1802	85	2163
674	0.0004379	1698	2097	93	2496
675	0.0005015	994	1464	60	1934
676	0.0003905	2213	2471	94	2729
677	0.0004495	1457	1916	90	2375
678	0.0004193	1527	1888	99	2249
679	0.0004197	1510	1856	72	2202
680	0.0005079	250	1022	55	1794
681	0.000428	1281	1748	81	2215
682	0.0004777	624	1234	46	1844
683	0.0004483	1047	1502	75	1957
684	0.0004643	1252	1664	80	2076
685	0.000434	1462	1827	73	2192
686	0.000499	634	1302	84	1970
687	0.0004429	1185	1635	80	2085
688	0.0004726	1118	1601	87	2084
689	0.0006172	48	951	79	1854
690	0.0004292	1808	2150	82	2492
691	0.0004658	1033	1506	81	1979
692	0.0005107	1054	1524	61	1994
693	0.0004377	1306	1726	99	2146
694	0.0004166	1257	1648	71	2039
695	0.0003574	2137	2380	90	2623
696	0.0003959	2298	2564	98	2830
697	0.0004266	1654	1984	99	2314
698	0.0005354	1640	2093	75	2546
699	0.0004215	1793	2125	68	2457
700	0.0004689	1713	2018	84	2323
701	0.0004737	609	1195	53	1781
702	0.0003406	2829	3040	99	3251
703	0.0003807	1800	2120	96	2440
704	0.0004231	1748	2081	89	2414
705	0.0004273	1569	1935	90	2301
706	0.0004684	1111	1643	81	2175
707	0.0003939	2165	2427	92	2689
708	0.0004199	1867	2157	92	2447
709	0.0004362	1247	1665	64	2083
710	0.0003957	1510	1872	89	2234
711	0.0004318	1757	2080	76	2403
712	0.0004315	1503	1871	95	2239
713	0.0004422	1747	2113	78	2479
714	0.0006221	504	1262	53	2020
715	0.000463	1418	1819	95	2220
716	0.0003754	1969	2223	99	2477
717	0.0003425	2363	2589	83	2815
718	0.0004227	1876	2193	73	2510
719	0.0005149	1734	2128	91	2522
720	0.0003731	1988	2293	93	2598
721	0.0004337	1237	1760	70	2283
722	0.0004209	1385	1826	79	2267
723	0.0004355	1716	2052	86	2388
724	0.0004138	1664	2048	93	2432
725	0.0003513	2394	2644	88	2894
726	0.0004276	1487	1889	78	2291
727	0.0004277	1532	1911	92	2290
728	0.000412	1617	1957	90	2297
729	0.0004148	1306	1763	84	2220
730	0.0005162	1239	1676	89	2113
731	0.0004749	1865	2240	81	2615
732	0.0003744	1820	2112	96	2404
733	0.0004247	2052	2405	99	2758
734	0.0004496	1202	1635	85	2068
735	0.0004634	649	1309	79	1969
736	0.0004291	1654	2028	71	2402
737	0.0004571	1222	1674	74	2126
738	0.0003586	2443	2668	99	2893
739	0.0003749	2269	2541	94	2813
740	0.0004764	1874	2219	89	2564
741	0.0004509	1477	1901	81	2325
742	0.0004416	1788	2102	88	2416
743	0.0004159	1543	1956	74	2369
744	0.0004564	677	1202	57	1727
745	0.0003588	1649	1924	88	2199
746	0.0005143	1481	1857	86	2233
747	0.0005047	686	1278	80	1870
748	0.000424	1690	2025	73	2360
749	0.0004928	1472	1874	85	2276
750	0.0004745	1198	1718	74	2238
751	0.0003803	2358	2619	98	2880
752	0.0004488	1408	1774	73	2140
753	0.0003771	1826	2124	91	2422
754	0.0004517	1595	2020	80	2445
755	0.0004789	906	1448	87	1990
756	0.0004716	1069	1556	87	2043
757	0.0003989	1692	2043	98	2394
758	0.0003302	2230	2443	76	2656
759	0.0003354	2768	2960	84	3152
760	0.0003836	1609	1948	96	2287
761	0.0004163	1471	1881	93	2291
762	0.0003979	1755	2088	92	2421
763	0.0004216	1891	2227	86	2563
764	0.0005158	826	1425	65	2024
765	0.0004539	1172	1636	92	2100
766	0.0004182	2409	2627	94	2845
767	0.000522	1144	1641	80	2138
768	0.0003523	2368	2629	92	2890
769	0.0004694	1005	1585	74	2165
770	0.0004295	2186	2459	94	2732
771	0.0004345	1286	1705	71	2124
772	0.0004331	1789	2087	86	2385
773	0.0004391	929	1443	68	1957
774	0.0004254	1029	1425	71	1821
775	0.0004487	1562	1953	92	2344
776	0.0004631	1155	1683	66	2211
777	0.0004413	1200	1669	84	2138
778	0.0004456	1575	2002	99	2429
779	0.0004445	1981	2333	89	2685
780	0.0004204	1879	2236	99	2593
781	0.0004379	1882	2213	93	2544
782	0.0005218	1196	1608	89	2020
783	0.0004705	1748	2089	93	2430
784	0.0003657	2150	2429	84	2708
785	0.0004739	1037	1486	78	1935
786	0.0004493	1838	2194	94	2550
787	0.0004231	2130	2392	95	2654
788	0.0004332	1480	1876	99	2272
789	0.0004055	1470	1828	95	2186
790	0.0004001	1640	1994	89	2348
791	0.0005375	543	1181	76	1819
792	0.0004549	1015	1473	60	1931
793	0.0003888	1470	1810	70	2150
794	0.0004192	1836	2139	80	2442
795	0.0004576	1166	1665	76	2164
796	0.0004004	2312	2581	99	2850
797	0.0004241	1414	1759	83	2104
798	0.0004639	792	1337	87	1882
799	0.0004953	1432	1867	84	2302
800	0.0004306	1814	2188	90	2562
801	0.0004563	1576	1928	84	2280
802	0.0004341	1440	1787	79	2134
803	0.0004374	1326	1699	82	2072
804	0.000379	2216	2484	96	2752
805	0.0004237	1411	1766	67	2121
806	0.0004078	2351	2631	99	2911
807	0.0005019	761	1400	95	2039
808	0.0004568	1002	1496	65	1990
809	0.0004921	1124	1663	82	2202
810	0.0005215	1330	1754	82	2178
811	0.0003614	2442	2672	93	2902
812	0.0004103	1444	1830	95	2216
813	0.0004391	1396	1839	73	2282
814	0.0004346	988	1458	69	1928
815	0.0003847	2097	2354	93	2611
816	0.0005134	992	1483	57	1974
817	0.0004559	1623	1956	88	2289
818	0.0004899	2004	2300	95	2596
819	0.0004711	887	1357	51	1827
820	0.0004517	442	1056	56	1670
821	0.0004294	1929	2251	91	2573
822	0.0004258	1448	1838	83	2228
823	0.0004668	1937	2265	98	2593
824	0.0004111	1560	1935	86	2310
825	0.0004367	761	1277	56	1793
826	0.0004421	1134	1595	67	2056
827	0.0004149	1804	2119	97	2434
828	0.0004148	1865	2184	90	2503
829	0.0004351	1573	1964	79	2355
830	0.0004846	1347	1821	94	2295
831	0.0004403	1524	1922	97	2320
832	0.00046	714	1326	83	1938
833	0.0003747	2158	2461	97	2764
834	0.0004666	918	1456	69	1994
835	0.0004168	2055	2369	95	2683
836	0.0004662	1166	1611	85	2056
837	0.0004302	1690	2042	86	2394
838	0.0004717	659	1246	93	1833
839	0.000399	1928	2264	75	2600
840	0.0003852	2431	2652	87	2873
841	0.0004406	2118	2376	95	2634
842	0.0004133	2045	2394	74	2743
843	0.0004903	1454	1820	69	2186
844	0.0004046	1703	2015	81	2327
845	0.0004669	2176	2417	82	2658
846	0.0004359	1373	1811	91	2249
847	0.0003531	2230	2512	90	2794
848	0.0004198	1650	2046	78	2442
849	0.000407	2091	2428	87	2765
850	0.000359	2442	2658	93	2874
851	0.0004499	967	1403	69	1839
852	0.0003922	2014	2363	94	2712
853	0.0004795	1766	2078	73	2390
854	0.0004869	1770	2147	85	2524
855	0.0004244	1372	1788	95	2204
856	0.0004974	977	1483	74	1989
857	0.0004029	1944	2288	86	2632
858	0.000467	1298	1692	82	2086
859	0.0004425	1486	1853	80	2220
860	0.0004932	266	1041	49	1816
861	0.0003904	1903	2199	81	2495
862	0.0003461	2651	2869	88	3087
863	0.0004851	500	1141	61	1782
864	0.0003927	1743	2071	97	2399
865	0.0003755	2178	2424	97	2670
866	0.0004212	1545	1991	90	2437
867	0.0004614	767	1360	71	1953
868	0.000399	2222	2529	92	2836
869	0.0004147	1080	1490	86	1900
870	0.0004448	1061	1507	84	1953
871	0.0004495	1284	1706	82	2128
872	0.000429	1333	1733	61	2133
873	0.0004297	883	1454	92	2025
874	0.0004014	2206	2477	92	2748
875	0.0004681	1646	1999	83	2352
876	0.0004265	1234	1697	89	2160
877	0.0004404	1324	1765	91	2206
878	0.0004419	1529	1909	88	2289
879	0.0004699	1135	1615	83	2095
880	0.0004086	1897	2260	98	2623
881	0.0004919	1200	1669	93	2138
882	0.0003723	2182	2436	82	2690
883	0.0004679	817	1411	45	2005
884	0.0005655	684	1326	79	1968
885	0.0004645	1514	1925	85	2336
886	0.0003999	2142	2443	92	2744
887	0.0004043	1666	1987	99	2308
888	0.0003502	2595	2857	99	3119
889	0.0004082	1740	2122	96	2504
890	0.0004871	606	1250	78	1894
891	0.0003911	2585	2808	95	3031
892	0.00044	1141	1640	81	2139
893	0.000493	1400	1811	83	2222
894	0.0004529	1239	1647	89	2055
895	0.0004829	1407	1872	95	2337
896	0.0004175	1103	1563	65	2023
897	0.0003698	1971	2265	84	2559
898	0.0004624	1930	2256	97	2582
899	0.0004469	1225	1621	96	2017
900	0.0004081	1034	1504	74	1974
901	0.0004782	1580	1932	93	2284
902	0.0003959	1842	2167	95	2492
903	0.000471	725	1206	53	1687
904	0.0005208	130	893	57	1656
905	0.0003876	1616	1968	82	2320
906	0.0004624	1059	1573	98	2087
907	0.0003982	2118	2409	87	2700
908	0.000429	1843	2204	99	2565
909	0.0003969	2254	2563	97	2872
910	0.0004006	1989	2282	87	2575
911	0.0004572	675	1265	61	1855
912	0.000473	884	1392	65	1900
913	0.0003938	2062	2411	93	2760
914	0.0004207	991	1448	83	1905
915	0.0004384	873	1321	86	1769
916	0.0005644	1388	1807	95	2226
917	0.0004304	1189	1663	83	2137
918	0.0003897	1608	1942	95	2276
919	0.0004422	1225	1642	68	2059
920	0.0004221	1107	1564	82	2021
921	0.0003975	2156	2426	95	2696
922	0.0004114	1393	1808	92	2223
923	0.0003712	1853	2163	78	2473
924	0.0004559	1397	1824	73	2251
925	0.0004896	1699	2043	71	2387
926	0.0004167	1264	1697	92	2130
927	0.0004467	1386	1782	81	2178
928	0.0003917	1695	2059	87	2423
929	0.0004715	1180	1615	90	2050
930	0.0004101	1401	1839	68	2277
931	0.0004817	1492	1884	86	2276
932	0.0004313	1714	2050	75	2386
933	0.000409	1963	2253	88	2543
934	0.0004239	1825	2124	68	2423
935	0.0004249	1785	2105	97	2425
936	0.0004313	1686	1980	77	2274
937	0.0003673	2598	2848	99	3098
938	0.0004123	1895	2234	83	2573
939	0.0004419	1468	1887	99	2306
940	0.0004368	1236	1676	80	2116
941	0.0004948	1320	1744	85	2168
942	0.0005031	1139	1664	90	2189
943	0.0004108	1143	1602	57	2061
944	0.0003787	2614	2849	98	3084
945	0.0004495	1234	1726	74	2218
946	0.000412	1135	1580	73	2025
947	0.0004321	1073	1583	60	2093
948	0.0004312	1183	1717	94	2251
949	0.0004681	825	1382	73	1939
950	0.0004098	2031	2365	89	2699
951	0.000412	2038	2336	94	2634
952	0.000399	2429	2648	92	2867
953	0.0003693	2262	2498	87	2734
954	0.0003911	1648	1998	68	2348
955	0.0004558	1227	1664	72	2101
956	0.0004301	1389	1803	83	2217
957	0.0005162	711	1259	51	1807
958	0.0004848	180	954	37	1728
959	0.0004197	1517	1839	75	2161
960	0.0005085	1205	1645	88	2085
961	0.0004098	1164	1600	85	2036
962	0.000455	2218	2485	99	2752
963	0.0003697	2001	2295	94	2589
964	0.0004169	1924	2216	94	2508
965	0.0004383	1810	2155	80	2500
966	0.0004475	1399	1816	94	2233
967	0.0003931	2147	2437	94	2727
968	0.0004576	1565	1911	63	2257
969	0.0003557	2486	2733	99	2980
970	0.0003468	2186	2435	89	2684
971	0.0005033	892	1473	60	2054
972	0.0004219	1949	2268	93	2587
973	0.0003572	2085	2338	81	2591
974	0.0004032	1962	2284	90	2606
975	0.0003583	2174	2445	92	2716
976	0.0004063	1346	1715	94	2084
977	0.0003939	2117	2427	98	2737
978	0.0004384	1313	1723	89	2133
979	0.0004498	1240	1715	77	2190
980	0.0003704	2047	2356	98	2665
981	0.0004989	817	1377	75	1937
982	0.0005041	1322	1748	96	2174
983	0.0003573	2552	2823	89	3094
984	0.0003459	2302	2552	98	2802
985	0.0004068	1881	2204	95	2527
986	0.0004131	1308	1702	84	2096
987	0.0004206	1702	2054	94	2406
988	0.0004535	1171	1684	78	2197
989	0.0003949	2026	2316	99	2606
990	0.0004862	1228	1634	78	2040
991	0.0004166	2224	2500	75	2776
992	0.0004364	2126	2425	96	2724
993	0.000418	1597	1954	90	2311
994	0.0004355	892	1403	76	1914
995	0.0004153	1573	1982	91	2391
996	0.0003391	2295	2558	96	2821
997	0.0004323	1526	1937	83	2348
998	0.0004019	1955	2278	76	2601
999	0.0003582	1947	2237	94	2527
mean	0.000434087	1547.56	1939.46	84.694	2331.37

## Sheet: GS_FemaleOpt
	time	SEq	Bal	Reg	Egal
0	0.0004032	1248	1662	86	2076
1	0.0003426	2473	2729	90	2985
2	0.0003858	1598	1938	99	2278
3	0.0003827	1656	2006	79	2356
4	0.0003679	1978	2292	99	2606
5	0.0005546	1546	1947	92	2348
6	0.0003664	1611	1917	90	2223
7	0.0004275	918	1411	50	1904
8	0.0004021	1443	1830	85	2217
9	0.0004714	1217	1666	94	2115
10	0.0003385	1997	2266	91	2535
11	0.0003766	1865	2184	83	2503
12	0.0003981	1249	1620	92	1991
13	0.0003997	970	1443	74	1916
14	0.0004111	1013	1466	65	1919
15	0.0003819	2065	2380	93	2695
16	0.0004594	1339	1746	97	2153
17	0.0004212	1686	2023	84	2360
18	0.0003687	1621	1968	96	2315
19	0.0004288	1178	1560	90	1942
20	0.0004644	307	1031	94	1755
21	0.0003796	1859	2196	87	2533
22	0.0003922	1273	1718	67	2163
23	0.0003813	1901	2190	91	2479
24	0.0003978	1647	2015	89	2383
25	0.0003424	1757	2057	98	2357
26	0.0003656	2116	2411	81	2706
27	0.0003937	1824	2186	93	2548
28	0.0003351	2178	2422	95	2666
29	0.0003954	1393	1807	68	2221
30	0.0004145	1292	1734	88	2176
31	0.0004312	626	1195	78	1764
32	0.0004299	1003	1498	93	1993
33	0.0003518	1760	2062	83	2364
34	0.0004207	1484	1892	98	2300
35	0.0004714	1276	1747	89	2218
36	0.0003752	2208	2495	98	2782
37	0.0004092	1308	1758	76	2208
38	0.0004857	464	1158	61	1852
39	0.0003991	1377	1765	75	2153
40	0.000478	1290	1794	82	2298
41	0.0004028	1514	1841	92	2168
42	0.0003787	1917	2220	91	2523
43	0.0003839	1780	2187	90	2594
44	0.0004018	1304	1715	71	2126
45	0.0004204	1012	1475	83	1938
46	0.0004971	802	1337	60	1872
47	0.0003883	1454	1848	85	2242
48	0.0004242	2041	2336	88	2631
49	0.0005364	1138	1578	92	2018
50	0.0004058	982	1447	71	1912
51	0.0003549	2029	2310	86	2591
52	0.0004059	1394	1831	73	2268
53	0.0003884	1309	1707	73	2105
54	0.0004551	1051	1567	89	2083
55	0.0003853	1938	2286	95	2634
56	0.0003536	1995	2308	96	2621
57	0.0003765	2036	2368	94	2700
58	0.0005416	2006	2289	83	2572
59	0.000336	1737	2027	85	2317
60	0.0004554	928	1479	76	2030
61	0.0004195	1846	2130	79	2414
62	0.0003943	1969	2336	84	2703
63	0.000428	639	1257	91	1875
64	0.0004381	1335	1740	91	2145
65	0.0004838	1	870	97	1739
66	0.0003619	2032	2329	92	2626
67	0.0003617	2269	2567	95	2865
68	0.0003854	1498	1881	99	2264
69	0.000432	1881	2224	78	2567
70	0.0003259	2471	2733	93	2995
71	0.0004439	1424	1776	73	2128
72	0.0003972	2301	2534	99	2767
73	0.0003761	1764	2119	71	2474
74	0.000328	2411	2677	88	2943
75	0.0004069	1303	1729	76	2155
76	0.0004757	1706	2075	83	2444
77	0.0003529	1903	2186	84	2469
78	0.0003523	2102	2360	92	2618
79	0.0003323	2212	2470	94	2728
80	0.0003526	1862	2159	93	2456
81	0.0003535	2298	2584	98	2870
82	0.0003787	1457	1857	76	2257
83	0.0004229	639	1192	67	1745
84	0.0004511	566	1198	60	1830
85	0.0004118	1212	1657	98	2102
86	0.0003323	2484	2690	95	2896
87	0.0003513	2146	2422	98	2698
88	0.0003746	1927	2234	89	2541
89	0.0004339	1036	1468	99	1900
90	0.0003998	1724	2063	90	2402
91	0.0004441	1007	1554	80	2101
92	0.0005289	84	944	51	1804
93	0.0003365	1996	2238	95	2480
94	0.0003771	1883	2164	86	2445
95	0.0004109	1800	2194	85	2588
96	0.0004183	1427	1863	91	2299
97	0.0003876	1505	1848	75	2191
98	0.0004201	1460	1961	87	2462
99	0.0003403	2355	2614	87	2873
100	0.0003964	1035	1498	96	1961
101	0.000443	1058	1557	81	2056
102	0.0003818	1482	1854	94	2226
103	0.0005513	684	1344	57	2004
104	0.0003792	1607	1972	91	2337
105	0.0003955	1799	2138	89	2477
106	0.0004279	1127	1575	91	2023
107	0.000407	1384	1773	86	2162
108	0.0003406	2276	2552	95	2828
109	0.0004059	1792	2138	74	2484
110	0.0004014	1401	1812	99	2223
111	0.0005398	437	1122	56	1807
112	0.0003164	2210	2408	97	2606
113	0.0003919	1285	1689	82	2093
114	0.000496	1344	1787	79	2230
115	0.00038	1832	2162	83	2492
116	0.0004342	826	1388	63	1950
117	0.0005113	1834	2151	85	2468
118	0.0003821	1289	1720	86	2151
119	0.0003788	1861	2161	78	2461
120	0.0003397	2190	2470	90	2750
121	0.0003731	1571	1909	91	2247
122	0.0003846	1833	2196	78	2559
123	0.0004488	1458	1817	86	2176
124	0.0003844	1497	1898	91	2299
125	0.0003345	2097	2348	94	2599
126	0.0003559	2162	2442	89	2722
127	0.0004343	1253	1640	77	2027
128	0.0004617	448	1126	66	1804
129	0.0003631	2119	2404	79	2689
130	0.0003486	1972	2274	89	2576
131	0.0004044	1208	1649	94	2090
132	0.0004906	1425	1786	91	2147
133	0.0004351	607	1234	55	1861
134	0.0004042	1658	2081	81	2504
135	0.0004299	1283	1848	98	2413
136	0.0003015	2580	2777	94	2974
137	0.0004523	1272	1744	86	2216
138	0.0004627	698	1319	66	1940
139	0.0004049	1236	1679	69	2122
140	0.0003694	2345	2655	95	2965
141	0.0004217	1419	1788	70	2157
142	0.0004256	1044	1555	70	2066
143	0.0004507	1345	1760	94	2175
144	0.0004329	582	1200	51	1818
145	0.0004264	1724	2093	97	2462
146	0.0005036	1	867	58	1733
147	0.0003478	1636	1952	78	2268
148	0.0004305	972	1550	73	2128
149	0.0004634	1945	2281	77	2617
150	0.0003527	2641	2852	87	3063
151	0.000388	1791	2114	97	2437
152	0.0004172	1622	2028	89	2434
153	0.0004155	1397	1779	93	2161
154	0.0003867	1582	1920	92	2258
155	0.0003741	1545	1889	88	2233
156	0.0004301	631	1250	94	1869
157	0.0003513	2058	2321	93	2584
158	0.0003742	1597	1959	91	2321
159	0.0003734	2098	2395	99	2692
160	0.0003954	938	1416	63	1894
161	0.0003853	1239	1648	85	2057
162	0.000417	941	1517	51	2093
163	0.0004023	1597	1983	88	2369
164	0.0003499	2197	2464	99	2731
165	0.0004338	983	1450	68	1917
166	0.0004066	1218	1610	73	2002
167	0.0004065	1473	1855	71	2237
168	0.0004277	1852	2204	93	2556
169	0.0003654	1599	1951	87	2303
170	0.0003886	1616	1945	95	2274
171	0.0003771	1689	2047	79	2405
172	0.0003913	1598	1917	86	2236
173	0.0003828	1265	1667	81	2069
174	0.0004262	1127	1682	82	2237
175	0.0004942	1751	2074	91	2397
176	0.0003686	1933	2267	94	2601
177	0.0004877	579	1228	50	1877
178	0.0004202	1610	1922	84	2234
179	0.0004051	643	1145	47	1647
180	0.0003826	2299	2605	98	2911
181	0.0003478	2362	2631	95	2900
182	0.0003831	1498	1864	98	2230
183	0.000372	1992	2340	89	2688
184	0.0004223	1033	1475	64	1917
185	0.0003904	1506	1896	72	2286
186	0.000393	1749	2073	99	2397
187	0.0003786	2205	2535	92	2865
188	0.0004227	856	1364	77	1872
189	0.0003344	1825	2105	86	2385
190	0.0004149	851	1406	84	1961
191	0.0004113	899	1388	90	1877
192	0.0004212	1532	1892	72	2252
193	0.0004483	761	1318	72	1875
194	0.0003852	1392	1772	94	2152
195	0.0003855	1579	1967	93	2355
196	0.000436	1051	1558	87	2065
197	0.0004302	1342	1722	91	2102
198	0.0004165	1112	1586	58	2060
199	0.0003384	2413	2688	99	2963
200	0.0004345	2053	2348	95	2643
201	0.000433	1746	2102	97	2458
202	0.0004034	1142	1616	74	2090
203	0.0004269	1024	1495	97	1966
204	0.0004119	1261	1696	89	2131
205	0.0004317	675	1250	84	1825
206	0.0004597	1288	1739	75	2190
207	0.0003724	1610	2013	99	2416
208	0.0004588	1853	2165	94	2477
209	0.0004059	1576	1945	67	2314
210	0.0003333	2541	2771	97	3001
211	0.0003692	2016	2373	97	2730
212	0.0004259	1296	1778	95	2260
213	0.000344	1889	2152	79	2415
214	0.0004377	1287	1754	82	2221
215	0.0003871	1342	1738	78	2134
216	0.0003789	1881	2211	95	2541
217	0.0004242	1610	1975	93	2340
218	0.0004946	982	1525	64	2068
219	0.0003915	1584	1966	80	2348
220	0.0004488	681	1258	93	1835
221	0.0003837	1954	2275	93	2596
222	0.0003794	1575	1939	89	2303
223	0.0003396	2472	2741	83	3010
224	0.0003894	1753	2121	76	2489
225	0.0004405	1803	2112	94	2421
226	0.0004034	1012	1467	68	1922
227	0.0004264	1047	1563	78	2079
228	0.0003399	1869	2162	93	2455
229	0.0003472	1617	1926	95	2235
230	0.0004061	1221	1645	75	2069
231	0.0003493	2425	2699	98	2973
232	0.0003082	2265	2471	86	2677
233	0.0004545	1113	1631	93	2149
234	0.0003491	2106	2362	92	2618
235	0.0003312	2564	2778	91	2992
236	0.0003905	1597	1955	91	2313
237	0.0003964	1503	1873	99	2243
238	0.0003384	2176	2416	96	2656
239	0.0003905	1879	2208	91	2537
240	0.0004287	800	1311	62	1822
241	0.0004096	971	1491	67	2011
242	0.0003824	1793	2129	99	2465
243	0.0003804	1848	2175	93	2502
244	0.0005022	891	1424	80	1957
245	0.0004017	1167	1594	99	2021
246	0.0004227	1780	2094	78	2408
247	0.0003583	2467	2749	92	3031
248	0.0004023	964	1454	63	1944
249	0.000432	1230	1613	94	1996
250	0.0004012	1560	1956	93	2352
251	0.0004057	1508	1918	82	2328
252	0.0003978	1305	1766	90	2227
253	0.0003946	1688	1985	93	2282
254	0.0003771	1669	1998	97	2327
255	0.00036	1652	1985	96	2318
256	0.0003349	1889	2154	89	2419
257	0.0003983	936	1453	60	1970
258	0.0004074	1447	1868	75	2289
259	0.0004096	1046	1536	85	2026
260	0.0003811	2058	2327	89	2596
261	0.0003824	1655	2038	97	2421
262	0.0003417	2322	2601	97	2880
263	0.0004551	215	979	85	1743
264	0.0004181	1255	1695	81	2135
265	0.0004258	1398	1831	80	2264
266	0.0003361	2205	2442	94	2679
267	0.000447	1818	2151	94	2484
268	0.0005342	2052	2349	98	2646
269	0.0004515	830	1372	77	1914
270	0.0003778	1967	2298	95	2629
271	0.0004002	2342	2567	99	2792
272	0.0003851	1482	1830	84	2178
273	0.0003459	2123	2403	95	2683
274	0.0003759	1357	1737	76	2117
275	0.0003963	1661	2009	96	2357
276	0.0004109	1244	1652	77	2060
277	0.000392	1469	1836	72	2203
278	0.0003686	1885	2217	98	2549
279	0.0003426	1993	2265	99	2537
280	0.0003947	1660	2043	99	2426
281	0.0003936	1778	2118	89	2458
282	0.0003569	2467	2764	88	3061
283	0.0004316	1410	1811	85	2212
284	0.0003716	2034	2357	91	2680
285	0.0003544	2032	2335	94	2638
286	0.0004531	1505	1963	81	2421
287	0.000392	1601	1940	80	2279
288	0.000356	1694	1994	87	2294
289	0.0004336	1781	2101	84	2421
290	0.0003416	1973	2224	96	2475
291	0.0004671	778	1346	94	1914
292	0.000428	1101	1583	59	2065
293	0.0003222	2371	2598	92	2825
294	0.0003411	2030	2308	95	2586
295	0.0003486	2020	2314	97	2608
296	0.0004216	1686	2047	73	2408
297	0.0004025	1811	2174	93	2537
298	0.0003644	1919	2219	94	2519
299	0.0004642	1762	2111	84	2460
300	0.0003623	2135	2430	94	2725
301	0.0004127	1077	1539	75	2001
302	0.0004292	2162	2440	98	2718
303	0.000404	1319	1742	66	2165
304	0.0004059	1802	2164	98	2526
305	0.0003453	2149	2442	99	2735
306	0.000427	755	1376	88	1997
307	0.0003827	1553	1924	99	2295
308	0.0004069	1444	1869	81	2294
309	0.0003887	1350	1777	87	2204
310	0.0003943	1914	2237	87	2560
311	0.0004177	1238	1703	87	2168
312	0.0003706	1447	1803	94	2159
313	0.0004019	1675	2080	96	2485
314	0.0003803	1873	2184	87	2495
315	0.0003829	1817	2143	82	2469
316	0.000428	1151	1645	82	2139
317	0.0003583	1988	2272	91	2556
318	0.000414	917	1463	73	2009
319	0.0003976	1286	1735	78	2184
320	0.000448	1283	1722	86	2161
321	0.0004037	1346	1756	80	2166
322	0.0003833	1878	2214	83	2550
323	0.0003887	1850	2203	85	2556
324	0.0003914	1399	1819	77	2239
325	0.0003776	1524	1899	98	2274
326	0.0003944	1872	2188	98	2504
327	0.0004092	1583	1965	85	2347
328	0.0004291	855	1367	64	1879
329	0.0003867	1588	1983	97	2378
330	0.0003746	1856	2175	99	2494
331	0.0003801	1828	2144	91	2460
332	0.0004081	1840	2222	95	2604
333	0.000392	1221	1619	57	2017
334	0.0003853	1928	2229	87	2530
335	0.0003755	1693	2018	83	2343
336	0.0003939	1265	1703	82	2141
337	0.0003775	1761	2086	85	2411
338	0.0003461	1813	2093	84	2373
339	0.0004584	1461	1837	92	2213
340	0.0004037	1174	1617	97	2060
341	0.0003956	1408	1799	91	2190
342	0.0004269	1279	1765	98	2251
343	0.0004665	1056	1576	69	2096
344	0.0005644	848	1400	90	1952
345	0.0004385	1537	1950	90	2363
346	0.0003631	1947	2238	90	2529
347	0.0004027	1392	1774	63	2156
348	0.0003996	1537	1949	82	2361
349	0.0003766	1946	2275	93	2604
350	0.0003829	1548	1881	77	2214
351	0.0004022	1553	1913	88	2273
352	0.0004063	1452	1879	90	2306
353	0.000424	1003	1508	82	2013
354	0.0003582	2366	2647	97	2928
355	0.0004798	1308	1714	98	2120
356	0.0004246	1835	2169	95	2503
357	0.0003822	2075	2311	87	2547
358	0.0004134	1266	1635	96	2004
359	0.0003782	2454	2711	86	2968
360	0.0003546	2123	2450	97	2777
361	0.0004121	1742	2104	79	2466
362	0.0003722	2518	2753	97	2988
363	0.0004189	1001	1486	85	1971
364	0.0004587	672	1266	77	1860
365	0.0004448	1920	2255	78	2590
366	0.0004336	1667	2037	96	2407
367	0.0004119	1114	1561	80	2008
368	0.0003811	1746	2067	80	2388
369	0.0004088	1986	2315	92	2644
370	0.000341	1936	2228	99	2520
371	0.0004565	1077	1565	67	2053
372	0.0003401	2187	2463	96	2739
373	0.0003888	1319	1663	54	2007
374	0.0003909	1892	2263	83	2634
375	0.0003855	1472	1814	80	2156
376	0.0003726	1653	1995	81	2337
377	0.0003153	2388	2604	99	2820
378	0.0003792	2173	2493	93	2813
379	0.0004044	1239	1734	97	2229
380	0.0004094	1444	1890	68	2336
381	0.0003734	1690	2002	76	2314
382	0.0003746	1734	2039	94	2344
383	0.0003934	1318	1675	80	2032
384	0.0005372	1433	1832	76	2231
385	0.0004962	1387	1843	90	2299
386	0.0005815	1480	1897	89	2314
387	0.0003807	1251	1654	69	2057
388	0.0004196	2064	2330	85	2596
389	0.0003332	2288	2509	99	2730
390	0.0004204	1555	1916	79	2277
391	0.0003732	2159	2447	88	2735
392	0.0003914	1515	1887	82	2259
393	0.0004495	1174	1632	95	2090
394	0.0004217	1045	1541	77	2037
395	0.0004609	1405	1818	81	2231
396	0.0004237	1184	1606	78	2028
397	0.0004315	950	1483	56	2016
398	0.0003939	1548	1945	93	2342
399	0.0003829	1729	2060	87	2391
400	0.000473	735	1334	86	1933
401	0.0004726	501	1183	62	1865
402	0.0003776	1700	2073	99	2446
403	0.0003386	2277	2564	94	2851
404	0.0003998	1945	2274	85	2603
405	0.000394	1882	2201	97	2520
406	0.0003345	2364	2591	95	2818
407	0.0004621	869	1450	96	2031
408	0.0003925	1645	2042	95	2439
409	0.0003998	1270	1777	75	2284
410	0.0003972	1551	1899	90	2247
411	0.0003905	1846	2114	88	2382
412	0.0005344	874	1399	73	1924
413	0.0004107	1640	2030	83	2420
414	0.0004512	979	1493	73	2007
415	0.0004282	1437	1827	88	2217
416	0.000385	1665	2065	99	2465
417	0.0003537	2203	2463	88	2723
418	0.0004811	558	1190	73	1822
419	0.0004536	1652	1966	77	2280
420	0.0004078	1690	2022	69	2354
421	0.0004112	1209	1636	64	2063
422	0.0004364	531	1189	75	1847
423	0.0003538	1868	2137	88	2406
424	0.0004084	1019	1444	70	1869
425	0.0004632	1508	1922	85	2336
426	0.0004368	727	1285	89	1843
427	0.0003783	2237	2482	91	2727
428	0.0005702	781	1407	91	2033
429	0.0003972	1190	1622	74	2054
430	0.0003987	1448	1862	89	2276
431	0.0003927	2152	2489	95	2826
432	0.0003786	1765	2066	85	2367
433	0.0004177	1661	2010	86	2359
434	0.0004878	1287	1734	91	2181
435	0.0004758	1380	1844	90	2308
436	0.0004292	1076	1617	71	2158
437	0.0003845	1458	1831	87	2204
438	0.0003297	2119	2369	84	2619
439	0.0003744	1806	2123	79	2440
440	0.0004244	1231	1686	78	2141
441	0.0004496	490	1135	72	1780
442	0.0004296	905	1395	57	1885
443	0.0003325	2754	2961	98	3168
444	0.0004327	1237	1671	94	2105
445	0.0004666	367	1038	61	1709
446	0.0005707	1939	2219	80	2499
447	0.0003789	1785	2131	91	2477
448	0.0004068	1327	1811	91	2295
449	0.0004397	660	1244	53	1828
450	0.0004242	1238	1657	93	2076
451	0.0004021	1059	1508	74	1957
452	0.0004436	958	1461	86	1964
453	0.0004548	687	1319	87	1951
454	0.0003746	1808	2122	86	2436
455	0.0003829	2000	2299	90	2598
456	0.0004426	1142	1617	86	2092
457	0.0004282	2161	2463	89	2765
458	0.0004523	733	1341	68	1949
459	0.0003755	2443	2737	94	3031
460	0.0004603	750	1348	75	1946
461	0.0004409	508	1151	45	1794
462	0.0004138	1166	1603	99	2040
463	0.0003995	1460	1814	70	2168
464	0.0004529	569	1258	59	1947
465	0.0004628	1108	1637	84	2166
466	0.0003605	1817	2132	87	2447
467	0.0004418	1095	1534	82	1973
468	0.0004736	696	1359	70	2022
469	0.0003338	2110	2345	86	2580
470	0.0004198	491	1093	60	1695
471	0.0003363	2258	2479	92	2700
472	0.0003836	1523	1931	86	2339
473	0.0004035	1420	1853	89	2286
474	0.0004198	1332	1710	77	2088
475	0.0003755	1729	2053	88	2377
476	0.0004221	859	1382	65	1905
477	0.0003472	2110	2380	91	2650
478	0.0003998	1533	1918	75	2303
479	0.0004059	1773	2145	92	2517
480	0.0004221	1900	2244	93	2588
481	0.0003991	1821	2220	97	2619
482	0.0003726	2247	2530	99	2813
483	0.0004322	989	1523	97	2057
484	0.0003985	1160	1609	90	2058
485	0.0005135	320	1078	85	1836
486	0.0003808	1411	1806	83	2201
487	0.0004136	1285	1741	99	2197
488	0.0004065	1321	1764	60	2207
489	0.0004265	1518	1978	95	2438
490	0.0003811	1428	1799	74	2170
491	0.0004003	1177	1606	95	2035
492	0.0004131	1189	1633	63	2077
493	0.0003348	2236	2478	80	2720
494	0.0004231	1449	1806	89	2163
495	0.0004223	1112	1625	84	2138
496	0.0004065	1520	1967	82	2414
497	0.0003917	1562	1945	74	2328
498	0.0003465	2675	2915	81	3155
499	0.0004984	851	1350	78	1849
500	0.0003927	1045	1498	77	1951
501	0.0003548	2146	2431	97	2716
502	0.0003655	1777	2110	80	2443
503	0.0004152	759	1344	87	1929
504	0.000414	838	1323	52	1808
505	0.0004384	1598	2006	90	2414
506	0.0003676	1515	1821	89	2127
507	0.0003547	1909	2203	81	2497
508	0.0004051	1228	1636	69	2044
509	0.0003847	2065	2430	86	2795
510	0.0003956	1172	1576	71	1980
511	0.0005068	413	1096	45	1779
512	0.0004453	812	1413	66	2014
513	0.0003783	2414	2652	98	2890
514	0.0004496	2013	2333	81	2653
515	0.0004464	898	1493	71	2088
516	0.0003862	1688	2068	80	2448
517	0.000468	508	1205	74	1902
518	0.0004382	1585	2009	98	2433
519	0.0003498	1876	2159	77	2442
520	0.0004259	1049	1535	72	2021
521	0.0003536	2129	2430	94	2731
522	0.0003763	1863	2175	88	2487
523	0.0004523	940	1523	83	2106
524	0.0004515	1096	1606	83	2116
525	0.0004284	1108	1651	99	2194
526	0.0005151	1641	1965	81	2289
527	0.0003376	1767	2066	96	2365
528	0.000417	1662	1965	77	2268
529	0.0003353	1841	2138	94	2435
530	0.0003744	2061	2369	88	2677
531	0.0004002	1634	1975	89	2316
532	0.0003812	1708	2018	74	2328
533	0.0003763	1809	2124	91	2439
534	0.0004405	1828	2159	77	2490
535	0.000478	1297	1784	63	2271
536	0.0003785	1346	1696	77	2046
537	0.0004686	798	1308	63	1818
538	0.0003949	1636	2028	96	2420
539	0.0004135	1804	2163	82	2522
540	0.0004073	1508	1933	94	2358
541	0.0003766	2282	2566	92	2850
542	0.0003009	2663	2871	98	3079
543	0.0003833	1443	1826	67	2209
544	0.0004212	966	1460	76	1954
545	0.0003873	1600	1989	84	2378
546	0.0004834	757	1324	51	1891
547	0.0004445	1865	2238	97	2611
548	0.0003507	2085	2372	75	2659
549	0.0004171	1468	1855	98	2242
550	0.0004297	941	1488	77	2035
551	0.0003917	2232	2547	94	2862
552	0.0003676	2308	2600	98	2892
553	0.0003963	1084	1501	87	1918
554	0.0004107	1130	1583	75	2036
555	0.0003465	2154	2412	85	2670
556	0.0004452	1275	1722	78	2169
557	0.0003832	1412	1794	95	2176
558	0.0004584	890	1502	87	2114
559	0.0003855	1833	2150	89	2467
560	0.0003797	1885	2220	84	2555
561	0.0003718	1814	2119	94	2424
562	0.0003729	2233	2524	93	2815
563	0.0003851	1898	2181	94	2464
564	0.0003421	2377	2643	98	2909
565	0.0003659	1843	2166	91	2489
566	0.0004158	1284	1693	76	2102
567	0.0003673	1658	1979	99	2300
568	0.0004021	1445	1874	85	2303
569	0.0004148	1350	1776	98	2202
570	0.0004241	1224	1719	82	2214
571	0.0003821	1261	1670	99	2079
572	0.0003958	1782	2106	93	2430
573	0.0003647	1473	1859	77	2245
574	0.0003939	1122	1525	71	1928
575	0.0003774	1489	1838	77	2187
576	0.0003708	1999	2273	83	2547
577	0.0004205	1536	1899	98	2262
578	0.0004269	1329	1722	69	2115
579	0.000436	1597	1957	99	2317
580	0.0003793	1637	1981	78	2325
581	0.0004114	1843	2231	78	2619
582	0.0003913	1584	1949	79	2314
583	0.0004451	1244	1719	76	2194
584	0.000393	1877	2240	96	2603
585	0.0004181	1727	2077	95	2427
586	0.0003749	1520	1893	99	2266
587	0.0003593	2512	2759	94	3006
588	0.0004474	937	1534	66	2131
589	0.0003874	1622	1960	86	2298
590	0.0003448	2418	2663	87	2908
591	0.0004529	858	1414	71	1970
592	0.0003603	1953	2241	76	2529
593	0.0004338	1725	2085	93	2445
594	0.0004295	1840	2185	96	2530
595	0.0004171	1314	1758	97	2202
596	0.0002997	2843	3019	98	3195
597	0.0003494	2194	2485	98	2776
598	0.0007039	1087	1584	81	2081
599	0.0004998	1062	1551	65	2040
600	0.0003991	719	1266	61	1813
601	0.0003994	1858	2216	89	2574
602	0.0005101	63	925	58	1787
603	0.0004139	2243	2519	92	2795
604	0.0004033	1497	1914	84	2331
605	0.0003951	1867	2129	94	2391
606	0.0003461	1855	2134	83	2413
607	0.0004277	1449	1855	95	2261
608	0.0003868	1566	1940	89	2314
609	0.0003894	1969	2296	84	2623
610	0.0004361	1341	1794	81	2247
611	0.0004107	2190	2470	94	2750
612	0.0004225	1374	1769	94	2164
613	0.0003738	1705	2059	96	2413
614	0.0003744	1543	1905	85	2267
615	0.0004713	691	1324	61	1957
616	0.0003909	1402	1782	85	2162
617	0.0003964	1402	1828	82	2254
618	0.0003698	1626	1972	87	2318
619	0.0004608	850	1429	70	2008
620	0.0003509	1865	2137	89	2409
621	0.000351	2194	2429	85	2664
622	0.0004512	1608	2014	63	2420
623	0.0004158	1258	1728	90	2198
624	0.0004331	438	1077	46	1716
625	0.000372	2199	2434	93	2669
626	0.0003575	1736	2050	93	2364
627	0.0003985	1191	1629	97	2067
628	0.0003369	1935	2206	89	2477
629	0.0004439	982	1508	77	2034
630	0.0004007	1391	1805	76	2219
631	0.0003964	1302	1724	75	2146
632	0.0003878	1670	2035	85	2400
633	0.0004037	1716	2085	80	2454
634	0.0009959	2228	2477	94	2726
635	0.0004122	1309	1720	96	2131
636	0.0003757	1725	2044	85	2363
637	0.0004005	1248	1683	82	2118
638	0.0004339	923	1407	73	1891
639	0.0004749	881	1380	66	1879
640	0.0003989	1747	2094	91	2441
641	0.0004081	1765	2112	80	2459
642	0.0004174	1832	2154	86	2476
643	0.0004126	980	1542	94	2104
644	0.0004881	1824	2188	85	2552
645	0.0004795	301	1051	43	1801
646	0.0004807	322	1087	64	1852
647	0.0004286	859	1433	64	2007
648	0.0003995	1247	1679	96	2111
649	0.00042	1171	1582	78	1993
650	0.0003924	1097	1589	68	2081
651	0.0004208	2164	2476	92	2788
652	0.0004043	2038	2408	93	2778
653	0.0003727	1412	1774	80	2136
654	0.0003865	1510	1887	65	2264
655	0.0004369	1154	1615	66	2076
656	0.0004041	1433	1828	94	2223
657	0.0003529	1708	2004	92	2300
658	0.0004141	1151	1618	90	2085
659	0.000449	386	1090	57	1794
660	0.0004466	706	1271	65	1836
661	0.0004059	1381	1797	98	2213
662	0.0004386	1292	1741	94	2190
663	0.0004253	539	1122	87	1705
664	0.0003892	1367	1770	99	2173
665	0.0004367	995	1557	94	2119
666	0.0004566	1352	1822	93	2292
667	0.0003921	1774	2090	91	2406
668	0.0004065	1491	1830	87	2169
669	0.0004755	903	1482	81	2061
670	0.0003842	1707	2047	86	2387
671	0.0003744	1725	2073	82	2421
672	0.0004574	1438	1898	70	2358
673	0.0003682	1972	2302	83	2632
674	0.0003983	1129	1597	73	2065
675	0.0003872	1280	1684	85	2088
676	0.0003688	1897	2229	98	2561
677	0.000378	1369	1747	73	2125
678	0.0003759	2053	2373	99	2693
679	0.0004296	919	1415	55	1911
680	0.000372	1632	1925	76	2218
681	0.0004091	1055	1587	75	2119
682	0.0004005	1464	1886	70	2308
683	0.0004505	1380	1825	92	2270
684	0.0004059	1005	1447	89	1889
685	0.0004083	960	1493	99	2026
686	0.0004033	1147	1584	92	2021
687	0.0004126	1730	2055	87	2380
688	0.0004375	776	1394	82	2012
689	0.0004938	1752	2099	97	2446
690	0.0003723	1988	2309	88	2630
691	0.0004118	1281	1698	96	2115
692	0.0003634	1658	1977	88	2296
693	0.0004556	1435	1854	98	2273
694	0.000437	1279	1696	71	2113
695	0.0004102	1254	1615	83	1976
696	0.0003787	1927	2255	98	2583
697	0.0003419	2566	2821	95	3076
698	0.0004433	715	1357	85	1999
699	0.0005191	1306	1760	91	2214
700	0.000437	1656	2060	86	2464
701	0.0003681	2324	2589	94	2854
702	0.0003804	1615	1959	85	2303
703	0.0004397	1640	2060	87	2480
704	0.0003921	1530	1881	94	2232
705	0.0004809	579	1288	59	1997
706	0.0003719	2184	2491	94	2798
707	0.0003983	1246	1658	91	2070
708	0.000436	1078	1623	80	2168
709	0.0003829	1641	1996	94	2351
710	0.0004007	1774	2144	91	2514
711	0.0003562	2541	2772	90	3003
712	0.0003734	1597	1903	88	2209
713	0.0003569	1898	2204	97	2510
714	0.0003524	2351	2624	99	2897
715	0.0004506	640	1279	59	1918
716	0.0003135	2415	2640	92	2865
717	0.0004139	864	1333	75	1802
718	0.0003717	1222	1628	88	2034
719	0.0003727	2001	2281	93	2561
720	0.0003395	2558	2814	94	3070
721	0.0003602	2655	2911	87	3167
722	0.0004221	2026	2325	91	2624
723	0.0004433	859	1361	83	1863
724	0.0003505	2206	2489	98	2772
725	0.0003962	1401	1839	74	2277
726	0.0006402	1735	2107	87	2479
727	0.0003774	2062	2316	93	2570
728	0.0003704	1716	2065	89	2414
729	0.0004117	1611	2031	85	2451
730	0.0004219	1737	2090	96	2443
731	0.00038	1715	2075	99	2435
732	0.000345	1916	2179	90	2442
733	0.0003871	1527	1949	77	2371
734	0.0003972	1307	1753	75	2199
735	0.0003714	1724	2074	99	2424
736	0.000383	1931	2318	89	2705
737	0.0003804	1750	2087	83	2424
738	0.0003913	1427	1797	92	2167
739	0.0003939	1456	1914	77	2372
740	0.0004441	1032	1628	79	2224
741	0.0005522	739	1379	82	2019
742	0.0004368	1379	1823	95	2267
743	0.0004074	1198	1663	54	2128
744	0.0004836	1494	1856	79	2218
745	0.0004378	2143	2379	96	2615
746	0.0003877	1531	1875	97	2219
747	0.0004096	1040	1470	66	1900
748	0.0004185	1111	1588	78	2065
749	0.0004253	1272	1677	71	2082
750	0.0003976	1294	1758	81	2222
751	0.0003831	1453	1867	83	2281
752	0.0003976	1887	2181	96	2475
753	0.0004301	1164	1609	90	2054
754	0.0004267	1194	1684	64	2174
755	0.0003313	2594	2845	95	3096
756	0.0004799	1407	1785	74	2163
757	0.0004184	1171	1624	73	2077
758	0.0003773	1651	1960	72	2269
759	0.0003509	2018	2285	93	2552
760	0.0003885	1327	1743	93	2159
761	0.0004165	777	1311	62	1845
762	0.0004651	1703	2053	90	2403
763	0.0003792	1688	2053	74	2418
764	0.0005291	325	1115	77	1905
765	0.0003989	1620	1948	95	2276
766	0.0003348	2253	2492	96	2731
767	0.0004053	1670	2110	82	2550
768	0.0004249	1320	1798	84	2276
769	0.0003329	2577	2777	88	2977
770	0.0003588	1958	2268	93	2578
771	0.0004033	1233	1648	74	2063
772	0.0003823	1952	2309	90	2666
773	0.0003901	1344	1764	97	2184
774	0.0003831	1763	2041	99	2319
775	0.0004011	2067	2398	84	2729
776	0.0004144	1627	1987	89	2347
777	0.0004116	916	1454	54	1992
778	0.0004484	1163	1612	76	2061
779	0.0004267	987	1456	65	1925
780	0.0003756	1404	1746	95	2088
781	0.000345	2142	2436	98	2730
782	0.0003828	1574	1925	82	2276
783	0.0004499	1648	1969	85	2290
784	0.0003841	1413	1799	72	2185
785	0.0004031	2059	2350	87	2641
786	0.000365	2161	2470	97	2779
787	0.0003582	1930	2225	94	2520
788	0.0003315	2435	2677	85	2919
789	0.0003523	1803	2076	93	2349
790	0.0004189	1129	1607	70	2085
791	0.0004437	1340	1837	79	2334
792	0.0003805	2311	2578	98	2845
793	0.0003555	1866	2174	76	2482
794	0.0004208	1235	1637	76	2039
795	0.0003961	1330	1730	82	2130
796	0.0004616	900	1429	90	1958
797	0.0003618	1732	2017	84	2302
798	0.0004475	1615	1970	86	2325
799	0.0003498	1960	2251	97	2542
800	0.0004612	1270	1726	91	2182
801	0.0005861	590	1238	81	1886
802	0.0005012	1234	1654	92	2074
803	0.0004732	923	1416	75	1909
804	0.0004671	278	1008	53	1738
805	0.0003928	1539	1884	80	2229
806	0.0003469	1925	2202	74	2479
807	0.0004457	1783	2150	77	2517
808	0.0003764	1904	2240	90	2576
809	0.0004131	1702	2077	72	2452
810	0.0004344	892	1491	74	2090
811	0.0003693	2266	2577	99	2888
812	0.0003299	2307	2585	98	2863
813	0.0003798	1492	1861	94	2230
814	0.0004104	1032	1516	70	2000
815	0.0003676	1567	1931	92	2295
816	0.0004133	941	1421	92	1901
817	0.0003967	1218	1612	98	2006
818	0.0003934	2121	2426	94	2731
819	0.0003658	1908	2211	78	2514
820	0.0003978	1702	2109	92	2516
821	0.0003731	2272	2518	98	2764
822	0.0004327	725	1313	78	1901
823	0.0003648	2193	2451	96	2709
824	0.0004352	1367	1791	76	2215
825	0.0003682	1699	2015	81	2331
826	0.00041	1347	1731	84	2115
827	0.000418	1786	2137	95	2488
828	0.0004117	957	1455	67	1953
829	0.0003422	1589	1895	77	2201
830	0.0003267	2494	2721	90	2948
831	0.0004005	1933	2248	94	2563
832	0.0005395	442	1143	76	1844
833	0.0004362	1390	1787	91	2184
834	0.0003827	2017	2334	82	2651
835	0.0003852	2358	2618	95	2878
836	0.0004769	960	1456	54	1952
837	0.0004082	1588	2013	86	2438
838	0.0003575	2153	2401	99	2649
839	0.000408	1339	1747	68	2155
840	0.0003312	2459	2714	97	2969
841	0.0004506	749	1353	98	1957
842	0.0004477	797	1421	70	2045
843	0.0003772	2097	2352	89	2607
844	0.0003421	2618	2873	99	3128
845	0.0003914	1516	1900	74	2284
846	0.0003204	2194	2447	95	2700
847	0.0004287	1511	1940	93	2369
848	0.000389	1483	1868	83	2253
849	0.0003932	1756	2122	94	2488
850	0.0003743	1936	2225	76	2514
851	0.0004053	1018	1485	81	1952
852	0.0003479	1900	2232	95	2564
853	0.0003883	1998	2228	94	2458
854	0.0004115	878	1419	82	1960
855	0.0003351	1869	2136	83	2403
856	0.0004556	437	1140	73	1843
857	0.0004373	1524	1955	87	2386
858	0.0004161	1233	1638	95	2043
859	0.0003706	2122	2386	97	2650
860	0.0004006	1626	2009	81	2392
861	0.0003694	2104	2394	97	2684
862	0.0003862	1179	1586	70	1993
863	0.0003683	2315	2569	89	2823
864	0.0004845	2066	2358	82	2650
865	0.0004611	746	1358	60	1970
866	0.000421	1048	1528	75	2008
867	0.0004442	1552	1965	92	2378
868	0.0003787	1876	2220	94	2564
869	0.0005748	342	1039	67	1736
870	0.0003747	1932	2244	91	2556
871	0.0004271	1632	2002	82	2372
872	0.0004045	1675	2064	84	2453
873	0.0004262	1321	1819	98	2317
874	0.0003447	2162	2428	82	2694
875	0.0004487	1064	1511	62	1958
876	0.0004088	1821	2168	92	2515
877	0.000477	905	1362	82	1819
878	0.0004161	1650	1996	66	2342
879	0.00043	1437	1838	99	2239
880	0.0003806	1195	1605	59	2015
881	0.0003876	1550	1894	88	2238
882	0.0003751	1689	2041	79	2393
883	0.0004083	2051	2369	86	2687
884	0.0003574	1963	2247	88	2531
885	0.0003716	1336	1764	85	2192
886	0.0004094	1867	2162	86	2457
887	0.000436	1862	2160	97	2458
888	0.0004279	865	1388	76	1911
889	0.000379	1390	1815	94	2240
890	0.0004325	864	1435	74	2006
891	0.0004195	868	1455	67	2042
892	0.000352	2207	2503	92	2799
893	0.0003706	1884	2202	85	2520
894	0.0003746	1550	1931	91	2312
895	0.0004095	2404	2665	87	2926
896	0.0004768	1131	1575	75	2019
897	0.0003786	1840	2178	89	2516
898	0.0005067	1625	1995	89	2365
899	0.0003759	1539	1940	98	2341
900	0.0004225	616	1229	69	1842
901	0.0004304	1611	1982	93	2353
902	0.0003511	2152	2439	98	2726
903	0.0004653	466	1080	72	1694
904	0.0004565	496	1123	57	1750
905	0.0003986	1008	1495	75	1982
906	0.0005192	1360	1765	91	2170
907	0.0003888	1649	2037	81	2425
908	0.0003174	2825	3032	98	3239
909	0.0004706	1227	1646	71	2065
910	0.0003944	1306	1695	78	2084
911	0.000486	1792	2098	95	2404
912	0.0004213	1418	1809	82	2200
913	0.0004113	1264	1728	97	2192
914	0.0004187	1581	1936	77	2291
915	0.0004051	1604	1960	93	2316
916	0.0004222	1432	1837	80	2242
917	0.0004619	713	1332	71	1951
918	0.0004002	918	1415	65	1912
919	0.0004824	889	1424	50	1959
920	0.0006473	1226	1662	96	2098
921	0.000503	546	1158	78	1770
922	0.000347	2615	2856	91	3097
923	0.0003693	1877	2201	73	2525
924	0.0003018	2688	2917	99	3146
925	0.0003964	976	1505	67	2034
926	0.0003877	1766	2104	68	2442
927	0.0004099	1036	1519	85	2002
928	0.0003759	1557	1938	86	2319
929	0.0004187	959	1485	67	2011
930	0.0006478	1657	2007	81	2357
931	0.0004365	1927	2235	94	2543
932	0.0003982	1264	1673	86	2082
933	0.0003939	1754	2105	90	2456
934	0.0003718	1317	1682	64	2047
935	0.0003795	1719	2047	76	2375
936	0.0003515	2196	2462	98	2728
937	0.0003813	1774	2092	84	2410
938	0.0004647	964	1491	92	2018
939	0.0004052	1341	1764	79	2187
940	0.0004011	2005	2316	79	2627
941	0.0004306	965	1459	82	1953
942	0.0004332	1270	1769	72	2268
943	0.0003903	1540	1932	92	2324
944	0.0003912	1077	1513	54	1949
945	0.0004119	1359	1779	75	2199
946	0.0004207	1434	1806	92	2178
947	0.0005084	1777	2143	79	2509
948	0.0003772	1599	1950	67	2301
949	0.0004437	796	1366	81	1936
950	0.0003967	1391	1786	72	2181
951	0.000398	1589	1968	89	2347
952	0.0004114	1309	1711	91	2113
953	0.0003406	2696	2909	99	3122
954	0.0003539	2821	3054	90	3287
955	0.0003451	1944	2252	89	2560
956	0.0004465	999	1470	71	1941
957	0.0004774	157	933	84	1709
958	0.0004753	1689	2025	88	2361
959	0.0004692	1309	1829	79	2349
960	0.0004411	1347	1741	98	2135
961	0.0004017	913	1383	59	1853
962	0.0004385	1164	1720	73	2276
963	0.0003403	2747	3003	97	3259
964	0.0004935	0	897	84	1794
965	0.0004144	1296	1750	78	2204
966	0.0003959	1522	1928	90	2334
967	0.0004556	794	1438	87	2082
968	0.0003768	1657	2031	85	2405
969	0.0003471	2113	2415	96	2717
970	0.0004487	1089	1578	80	2067
971	0.0003981	1348	1821	71	2294
972	0.0004193	1369	1732	96	2095
973	0.000436	715	1257	96	1799
974	0.0004361	829	1393	59	1957
975	0.0003803	2158	2438	90	2718
976	0.0004294	1313	1713	77	2113
977	0.0004106	1330	1743	81	2156
978	0.0003986	1199	1632	75	2065
979	0.0003987	1639	1981	99	2323
980	0.0003915	1734	2047	95	2360
981	0.0005755	1448	1836	69	2224
982	0.000664	1197	1658	58	2119
983	0.0003946	2152	2472	99	2792
984	0.0003699	1981	2325	88	2669
985	0.0004089	1455	1916	96	2377
986	0.0004338	1358	1776	66	2194
987	0.0003513	2005	2287	94	2569
988	0.0004333	1156	1605	71	2054
989	0.0003873	1768	2049	91	2330
990	0.0005103	1151	1610	93	2069
991	0.00038	1716	2052	85	2388
992	0.000426	1029	1449	92	1869
993	0.0003206	2748	2982	94	3216
994	0.0004044	1221	1655	82	2089
995	0.0004041	1028	1519	86	2010
996	0.0004033	1596	1965	90	2334
997	0.0004447	477	1138	80	1799
998	0.0004008	1545	1948	94	2351
999	0.0004131	1205	1616	65	2027
mean	0.000407356	1522.71	1919.83	84.284	2316.95

## Sheet: GS_Opt
	time	SEq	Bal	Reg	Egal
0	0.0008074	1248	1662	85	2076
1	0.0007708	1660	2025	78	2390
2	0.0007801	1546	1938	94	2278
3	0.0007584	1656	2006	79	2356
4	0.0008209	1412	1789	59	2166
5	0.0009339	1260	1669	86	2078
6	0.0007633	1611	1917	84	2223
7	0.0008752	918	1411	50	1904
8	0.0008132	1166	1653	85	2140
9	0.0008698	1217	1666	83	2115
10	0.0007944	1680	2012	89	2344
11	0.0007487	1785	2099	83	2413
12	0.0007877	1183	1572	92	1961
13	0.0008406	970	1443	74	1916
14	0.0007976	1013	1466	65	1919
15	0.000771	1618	2008	78	2398
16	0.0008292	1339	1746	76	2153
17	0.0008138	1347	1747	84	2147
18	0.0007247	1621	1968	95	2315
19	0.0008438	1178	1560	90	1942
20	0.0008353	307	1031	83	1755
21	0.0007194	1850	2168	87	2486
22	0.0007911	1273	1718	67	2163
23	0.0007881	1518	1917	83	2316
24	0.0007972	1485	1878	82	2271
25	0.0007035	1757	2057	91	2357
26	0.0007299	2116	2411	81	2706
27	0.0007821	1824	2186	89	2548
28	0.0007304	1448	1830	78	2212
29	0.000794	1393	1807	68	2221
30	0.0008051	1292	1725	83	2119
31	0.000836	626	1195	78	1764
32	0.0008337	1003	1498	84	1993
33	0.0006918	1760	2062	83	2364
34	0.0008574	974	1446	75	1918
35	0.0009199	619	1207	60	1795
36	0.0007995	1212	1743	95	2274
37	0.0008053	1217	1621	60	2025
38	0.0008798	464	1158	61	1852
39	0.0008396	1377	1765	75	2153
40	0.0008958	1113	1613	82	2113
41	0.0007613	1514	1841	92	2168
42	0.0007593	1476	1871	73	2266
43	0.0007716	1482	1846	82	2210
44	0.0007989	1304	1715	71	2126
45	0.0007477	1012	1475	83	1938
46	0.0008768	802	1337	60	1872
47	0.0008047	1454	1848	85	2242
48	0.0007877	1568	1901	88	2234
49	0.0009836	880	1383	92	1886
50	0.0008795	982	1447	71	1912
51	0.0007753	1644	2041	86	2438
52	0.0008163	1258	1614	68	1970
53	0.0008633	1309	1707	73	2105
54	0.0008421	1051	1567	89	2083
55	0.0008249	1568	1942	94	2316
56	0.0007617	1995	2270	96	2541
57	0.0008394	1412	1850	91	2288
58	0.000966	1656	1974	83	2292
59	0.0008846	1140	1591	85	2042
60	0.0008721	928	1479	66	2017
61	0.0008856	406	1065	50	1724
62	0.0008373	1338	1758	84	2178
63	0.0008714	639	1257	80	1875
64	0.000879	895	1469	70	2043
65	0.0009639	1	870	71	1739
66	0.0007816	1601	1945	86	2289
67	0.0007751	1459	1835	70	2211
68	0.0008632	568	1208	91	1848
69	0.0008344	1881	2224	78	2567
70	0.0007706	1892	2285	91	2678
71	0.000836	1424	1776	73	2128
72	0.0008125	1373	1740	93	2107
73	0.0008361	1764	2119	71	2474
74	0.0007698	1617	1976	88	2335
75	0.0007724	1303	1729	76	2155
76	0.0008915	1706	2075	83	2444
77	0.0007306	1903	2186	84	2469
78	0.0008127	1571	1983	79	2395
79	0.0008002	1871	2211	80	2551
80	0.0007603	1724	2141	74	2456
81	0.0008826	2097	2416	96	2735
82	0.0008137	1457	1857	76	2257
83	0.0008236	639	1192	67	1745
84	0.0009402	566	1198	60	1830
85	0.0008292	1212	1657	96	2102
86	0.0008012	2196	2490	95	2784
87	0.0007537	1808	2129	90	2450
88	0.000858	827	1435	83	2043
89	0.0008928	1036	1468	67	1900
90	0.0008624	1398	1809	81	2220
91	0.0008805	1007	1554	80	2101
92	0.0010002	84	944	51	1804
93	0.0007898	871	1354	60	1837
94	0.0007666	1883	2163	86	2421
95	0.0008152	1800	2194	85	2539
96	0.0008016	1427	1863	91	2299
97	0.0008151	1505	1846	75	2177
98	0.0008999	1460	1961	87	2454
99	0.0008146	380	1054	49	1728
100	0.0008229	1035	1498	93	1961
101	0.0008976	1058	1557	80	2056
102	0.0008367	1482	1854	88	2226
103	0.0009689	684	1344	57	2004
104	0.0007731	1607	1972	91	2337
105	0.0008515	1642	1964	86	2286
106	0.0009193	1033	1511	64	1989
107	0.0008952	1384	1773	86	2162
108	0.0007109	1935	2231	94	2527
109	0.0007907	1792	2138	74	2484
110	0.0008273	993	1477	77	1961
111	0.0009763	437	1122	56	1807
112	0.0008351	996	1501	76	2006
113	0.000917	311	985	73	1659
114	0.0009329	857	1383	64	1909
115	0.0007598	1832	2162	83	2492
116	0.0009881	826	1388	63	1950
117	0.0009353	1642	1992	84	2342
118	0.0008332	1289	1720	74	2151
119	0.0007437	1861	2161	78	2461
120	0.0007178	2190	2470	88	2750
121	0.0007854	1571	1909	91	2247
122	0.0009129	791	1290	71	1789
123	0.000809	1458	1817	84	2176
124	0.0007703	1497	1898	91	2299
125	0.0009152	294	1080	77	1866
126	0.0007474	1795	2128	89	2461
127	0.0008097	1253	1640	77	2027
128	0.0009112	448	1126	66	1804
129	0.0008985	1231	1723	74	2215
130	0.0007293	1910	2206	89	2502
131	0.0008765	771	1330	85	1889
132	0.0008936	1425	1786	91	2147
133	0.0008752	607	1234	55	1861
134	0.0008809	1658	2081	81	2426
135	0.0009963	1283	1791	87	2246
136	0.0007387	1085	1543	90	2001
137	0.0009071	1272	1744	86	2216
138	0.0008917	698	1319	66	1940
139	0.0008762	1236	1679	69	2122
140	0.0008	1652	2027	95	2402
141	0.0009404	544	1157	53	1770
142	0.0009574	765	1374	51	1983
143	0.0008733	1250	1694	68	2138
144	0.0008506	582	1200	51	1818
145	0.0008631	1469	1856	76	2243
146	0.0009505	1	867	58	1733
147	0.000804	1153	1651	78	2149
148	0.0008327	972	1550	73	2128
149	0.0008685	1945	2268	77	2589
150	0.000738	2478	2697	82	2916
151	0.0008147	1538	1897	92	2256
152	0.0007777	1622	2028	87	2434
153	0.0008692	1223	1649	79	2075
154	0.0008253	1368	1734	66	2100
155	0.0008665	1545	1889	88	2233
156	0.0008025	631	1250	94	1869
157	0.0007859	1302	1738	93	2174
158	0.0008255	1025	1417	85	1809
159	0.0008412	1365	1805	75	2245
160	0.0008071	938	1416	63	1894
161	0.0008331	918	1399	81	1880
162	0.000877	941	1517	51	2093
163	0.0008416	1592	1964	88	2336
164	0.0008124	597	1194	40	1791
165	0.0010044	983	1450	68	1917
166	0.0008225	1142	1575	62	2002
167	0.0008137	1075	1500	71	1925
168	0.0008042	1852	2204	91	2522
169	0.000797	1599	1951	64	2303
170	0.0008351	1616	1945	95	2274
171	0.0008431	1689	2047	69	2405
172	0.0008664	1190	1621	85	2052
173	0.000858	895	1380	58	1865
174	0.0008682	1127	1682	82	2237
175	0.000956	611	1146	42	1681
176	0.000789	1738	2037	77	2336
177	0.0009395	579	1228	50	1877
178	0.0008208	1610	1922	84	2234
179	0.0008567	643	1145	47	1647
180	0.0008978	929	1491	77	2053
181	0.0007948	1598	1961	95	2324
182	0.0008281	740	1257	61	1774
183	0.0008131	1455	1880	89	2305
184	0.0008659	1033	1475	64	1917
185	0.0008302	1506	1896	72	2286
186	0.0008131	1336	1741	93	2146
187	0.0008024	2205	2535	90	2865
188	0.000805	856	1364	77	1872
189	0.0007204	1794	2105	83	2385
190	0.0008558	851	1406	82	1961
191	0.0008928	352	1015	90	1678
192	0.0008602	1445	1831	72	2217
193	0.0009762	761	1318	72	1875
194	0.0008582	751	1338	84	1925
195	0.000866	1010	1510	93	2010
196	0.0008335	1051	1558	87	2065
197	0.000819	1342	1722	83	2102
198	0.0008856	1112	1586	58	2060
199	0.0007905	992	1456	85	1920
200	0.0008993	1031	1523	84	2015
201	0.0008788	975	1470	88	1965
202	0.0008258	1142	1616	74	2090
203	0.0008594	1024	1495	81	1966
204	0.0007964	1261	1696	89	2131
205	0.000903	615	1219	57	1823
206	0.0009012	1288	1739	75	2190
207	0.0007796	1610	2013	76	2369
208	0.00087	1437	1741	94	2045
209	0.0008215	1544	1897	67	2250
210	0.0007658	1888	2245	90	2602
211	0.0008399	1479	1907	85	2335
212	0.0008041	1296	1778	84	2260
213	0.0007318	1564	1888	65	2212
214	0.0008536	1287	1754	82	2221
215	0.0008254	1342	1738	78	2134
216	0.0008666	748	1372	57	1996
217	0.0008853	529	1163	71	1797
218	0.0009069	982	1525	64	2068
219	0.0008419	1484	1887	67	2290
220	0.0011995	681	1258	93	1835
221	0.0008533	778	1344	64	1910
222	0.0008026	1575	1939	81	2303
223	0.0007914	1292	1723	59	2154
224	0.0007854	1746	2078	76	2410
225	0.0007836	1803	2112	94	2421
226	0.0008648	1012	1467	68	1922
227	0.0008706	1047	1563	78	2079
228	0.0007498	1869	2162	93	2455
229	0.0008055	1040	1545	93	2050
230	0.0007598	1221	1645	75	2069
231	0.0008288	1319	1818	97	2317
232	0.0006532	2163	2407	86	2651
233	0.0008382	1113	1631	93	2149
234	0.0007619	2106	2362	78	2618
235	0.0007244	2018	2296	91	2574
236	0.0008603	1597	1955	89	2313
237	0.0008504	1456	1850	99	2243
238	0.0007971	2176	2416	96	2656
239	0.0008818	978	1529	76	2080
240	0.000847	800	1311	54	1822
241	0.0008411	971	1491	67	2011
242	0.0008387	1793	2129	89	2465
243	0.0008478	1728	2084	89	2440
244	0.0009101	891	1424	78	1957
245	0.0008049	1167	1594	73	2021
246	0.0008782	1674	2020	78	2366
247	0.0007725	1305	1728	64	2151
248	0.0008072	964	1454	63	1944
249	0.0008575	1230	1613	69	1996
250	0.0008162	1560	1956	93	2352
251	0.0007876	1508	1918	82	2328
252	0.0008505	1305	1766	90	2226
253	0.0008098	1688	1985	93	2282
254	0.0008263	1345	1713	94	2081
255	0.0007609	1652	1985	96	2318
256	0.000744	1573	1897	80	2221
257	0.0008198	936	1453	60	1970
258	0.000867	1263	1726	75	2189
259	0.0007745	1046	1536	83	2026
260	0.0007904	1777	2116	89	2455
261	0.0007957	1537	1882	94	2227
262	0.00074	1944	2254	97	2564
263	0.0009523	215	979	85	1743
264	0.0008981	1255	1695	81	2135
265	0.000844	1398	1831	80	2264
266	0.0007853	921	1393	55	1865
267	0.0008611	1818	2151	85	2484
268	0.0010501	416	1116	58	1816
269	0.0008387	830	1372	77	1914
270	0.0007506	1652	1946	78	2240
271	0.0007921	2061	2310	98	2559
272	0.0007959	1482	1830	74	2178
273	0.0008026	1713	2106	95	2499
274	0.0008227	1357	1737	76	2117
275	0.0008154	1661	2009	96	2357
276	0.0008641	1244	1652	77	2060
277	0.0007985	1469	1836	72	2203
278	0.0008159	487	1109	91	1731
279	0.0007655	1381	1718	87	2055
280	0.0008421	1660	2035	77	2370
281	0.0008924	538	1199	42	1860
282	0.0009126	1651	2031	88	2411
283	0.0008741	1400	1787	85	2174
284	0.000737	2034	2357	91	2678
285	0.0007684	1438	1838	94	2238
286	0.0009582	461	1254	77	2047
287	0.000833	1566	1940	69	2279
288	0.000817	977	1476	68	1975
289	0.0008946	1207	1610	57	2013
290	0.0007372	1973	2224	95	2475
291	0.0009328	778	1346	94	1914
292	0.000869	1101	1583	59	2065
293	0.0009016	680	1270	61	1860
294	0.000761	1898	2143	93	2388
295	0.0007377	1823	2146	78	2469
296	0.0009019	1303	1693	73	2083
297	0.0008452	1374	1781	89	2188
298	0.0007392	1919	2219	88	2519
299	0.0008687	1762	2111	84	2460
300	0.0007879	1545	1915	93	2285
301	0.0008264	1077	1539	75	2001
302	0.0009279	1320	1782	74	2244
303	0.0008253	1187	1638	66	2089
304	0.000916	702	1287	77	1872
305	0.0006959	2149	2442	95	2735
306	0.0009002	755	1376	79	1997
307	0.0007746	1553	1924	99	2295
308	0.0009059	374	1073	51	1772
309	0.0007947	1350	1777	87	2204
310	0.0007882	1849	2183	87	2517
311	0.0007494	1238	1703	87	2168
312	0.0007563	1447	1803	94	2159
313	0.0008436	1462	1904	96	2346
314	0.0008872	601	1315	74	2029
315	0.0007719	1711	2041	82	2371
316	0.0009756	1151	1645	82	2139
317	0.0007789	1517	1855	74	2193
318	0.0008258	917	1463	73	2009
319	0.0007614	1286	1735	78	2184
320	0.0008852	1283	1722	80	2161
321	0.0009725	1346	1756	80	2166
322	0.0008533	1253	1687	61	2121
323	0.0007713	1850	2141	85	2416
324	0.000801	1399	1819	69	2239
325	0.000815	1023	1505	66	1987
326	0.0008382	1360	1772	74	2184
327	0.0007953	1583	1965	85	2347
328	0.000876	855	1367	64	1879
329	0.0008487	573	1244	65	1915
330	0.0008182	1785	2146	93	2494
331	0.0008321	1315	1763	91	2211
332	0.0008843	1215	1653	83	2091
333	0.0009067	1221	1619	57	2017
334	0.0008439	1575	1988	87	2401
335	0.0007489	1693	2018	83	2343
336	0.0007956	1265	1703	82	2141
337	0.0008821	1188	1632	73	2076
338	0.0007746	1691	2047	80	2373
339	0.0009385	713	1265	67	1817
340	0.0008568	1010	1460	53	1910
341	0.0007797	1408	1799	91	2190
342	0.0008594	1279	1765	89	2251
343	0.0009603	540	1206	69	1872
344	0.0009497	848	1400	90	1952
345	0.0008965	1537	1950	85	2363
346	0.0007598	1923	2215	90	2507
347	0.0007508	1392	1774	63	2156
348	0.0008193	1537	1949	82	2361
349	0.0007756	1946	2275	91	2604
350	0.0008119	1500	1872	77	2214
351	0.0008077	1553	1913	88	2273
352	0.0008031	1452	1879	90	2300
353	0.0007612	1003	1508	80	2013
354	0.0007586	1915	2210	97	2505
355	0.0008984	1308	1714	94	2120
356	0.0008769	868	1415	58	1962
357	0.0008806	1148	1557	62	1966
358	0.0008078	1266	1635	81	2004
359	0.0008425	968	1490	86	2012
360	0.0008344	1503	1940	92	2377
361	0.000839	1354	1740	76	2126
362	0.0007285	2518	2753	97	2988
363	0.0008683	1001	1486	85	1971
364	0.000889	672	1266	77	1860
365	0.0008392	1579	1924	78	2269
366	0.0008311	1376	1711	81	2046
367	0.0007783	1114	1561	80	2008
368	0.0007962	1746	2067	80	2388
369	0.0008714	1345	1768	92	2191
370	0.0007767	1936	2228	78	2520
371	0.0008468	1077	1565	67	2053
372	0.0007687	1121	1600	70	2079
373	0.0008979	83	916	37	1749
374	0.0008214	1892	2263	83	2634
375	0.0008412	785	1344	75	1903
376	0.0008133	1103	1508	81	1913
377	0.0007992	741	1343	69	1945
378	0.0008111	1472	1860	93	2248
379	0.0008157	1239	1734	85	2229
380	0.000913	1444	1890	68	2336
381	0.0008591	486	1252	69	2018
382	0.0008179	1445	1822	73	2199
383	0.0008046	1318	1675	79	2032
384	0.0010672	742	1374	76	2006
385	0.001002	1387	1843	85	2299
386	0.0011104	363	1093	55	1823
387	0.0008286	1251	1654	69	2057
388	0.0008085	1604	1909	85	2214
389	0.000814	1094	1549	90	2004
390	0.0008557	1247	1698	74	2149
391	0.0007213	2159	2447	88	2735
392	0.000738	1515	1887	82	2259
393	0.0008758	1174	1632	87	2090
394	0.0008237	1045	1541	77	2037
395	0.000834	1405	1818	81	2231
396	0.0008424	1184	1606	78	2028
397	0.0009221	386	1151	56	1916
398	0.000844	1512	1913	74	2314
399	0.0008185	1474	1856	83	2238
400	0.0008875	735	1334	86	1933
401	0.0008558	501	1183	62	1865
402	0.0007808	1488	1882	77	2276
403	0.0007669	2214	2513	94	2812
404	0.0008362	1692	2071	85	2450
405	0.0008175	1226	1630	78	2034
406	0.000745	2137	2436	95	2735
407	0.0008774	869	1450	94	2031
408	0.0008378	1645	2042	95	2439
409	0.0009955	813	1415	70	2017
410	0.0007973	1288	1709	80	2130
411	0.0008254	1286	1698	88	2110
412	0.0009993	874	1399	73	1924
413	0.0008918	1007	1512	83	2017
414	0.0008616	979	1493	73	2007
415	0.0009095	1236	1624	78	2012
416	0.0008347	985	1493	62	2001
417	0.0007778	1374	1726	88	2078
418	0.0009481	558	1190	73	1822
419	0.000927	636	1221	55	1806
420	0.0008774	565	1195	64	1825
421	0.0008811	755	1377	64	1999
422	0.000847	531	1189	75	1847
423	0.0008101	1567	1960	88	2353
424	0.000887	1019	1444	70	1869
425	0.0008873	1508	1922	85	2336
426	0.0008771	727	1285	89	1843
427	0.0008075	1171	1605	71	2039
428	0.0010557	781	1407	75	1930
429	0.0008505	1190	1622	71	2054
430	0.0007992	1448	1862	89	2276
431	0.0008188	2152	2489	95	2774
432	0.0007737	1406	1784	81	2162
433	0.0008503	1312	1731	76	2150
434	0.0009411	743	1368	91	1993
435	0.0009317	1380	1844	90	2308
436	0.0009399	1076	1617	71	2158
437	0.0008168	1134	1616	85	2098
438	0.0007528	1578	1963	72	2348
439	0.0007897	1731	2119	79	2440
440	0.0008429	1231	1686	78	2141
441	0.0010151	490	1135	72	1780
442	0.000943	258	961	57	1664
443	0.0007042	2611	2875	94	3139
444	0.0010252	1237	1632	71	1998
445	0.0008609	367	1038	61	1709
446	0.0010482	1588	1998	80	2408
447	0.0007679	1785	2127	91	2469
448	0.0008256	1148	1619	82	2090
449	0.0008499	660	1244	53	1828
450	0.0009385	1238	1657	93	2076
451	0.0008468	1059	1508	74	1957
452	0.0009266	958	1461	86	1964
453	0.0008435	687	1319	81	1951
454	0.0007322	1808	2122	86	2436
455	0.0008249	1467	1896	81	2325
456	0.0008034	1142	1617	86	2092
457	0.0007918	2161	2463	89	2756
458	0.0008912	733	1341	68	1949
459	0.0007624	2114	2402	90	2690
460	0.0008676	750	1348	75	1946
461	0.0008815	508	1151	45	1794
462	0.0007939	1166	1603	89	2040
463	0.0008509	1101	1482	70	1863
464	0.0008156	569	1258	59	1947
465	0.0009311	980	1485	84	1990
466	0.0007402	1817	2111	87	2382
467	0.0008651	1095	1534	82	1973
468	0.0009314	696	1359	70	2022
469	0.0008507	481	1127	49	1773
470	0.0007953	491	1093	60	1695
471	0.0006939	2258	2479	92	2700
472	0.0008242	1368	1793	86	2218
473	0.0008499	1029	1516	65	2003
474	0.0009246	1147	1557	71	1967
475	0.0007647	1729	2053	88	2377
476	0.0009316	859	1382	65	1905
477	0.0008304	1316	1690	77	2064
478	0.000749	1533	1918	75	2303
479	0.0007855	1773	2145	81	2517
480	0.0008465	1374	1814	85	2254
481	0.0007898	1821	2220	92	2619
482	0.0007467	2139	2409	97	2679
483	0.0009335	989	1523	76	2057
484	0.0008587	1160	1609	88	2058
485	0.000905	320	1078	85	1836
486	0.0008126	1411	1806	81	2201
487	0.0008621	977	1547	79	2117
488	0.0008485	1187	1656	60	2125
489	0.0007858	1518	1978	95	2438
490	0.0008147	1428	1799	74	2170
491	0.000869	1177	1606	95	2035
492	0.0007662	1189	1633	63	2077
493	0.0007944	1308	1727	66	2146
494	0.0008501	1449	1806	89	2163
495	0.0008648	1110	1606	84	2102
496	0.0008528	1520	1967	82	2414
497	0.000932	1562	1945	74	2328
498	0.0007637	1718	2071	81	2424
499	0.0009298	851	1350	78	1849
500	0.0008105	1045	1498	77	1951
501	0.0007474	1741	2086	89	2431
502	0.0007333	1777	2110	80	2443
503	0.0007819	759	1344	87	1929
504	0.0007863	838	1323	52	1808
505	0.0008855	1442	1882	81	2322
506	0.0007852	1515	1821	85	2127
507	0.0008398	1170	1653	78	2136
508	0.000855	1228	1636	69	2044
509	0.0008068	1678	2068	78	2458
510	0.0008565	977	1470	57	1963
511	0.0009489	413	1096	45	1779
512	0.0008429	812	1413	66	2014
513	0.0007706	1362	1767	81	2172
514	0.0008715	1324	1727	81	2130
515	0.000891	898	1493	71	2088
516	0.0008454	1284	1780	73	2276
517	0.0009176	508	1205	73	1824
518	0.0009248	1585	2009	88	2433
519	0.0007286	1876	2159	77	2442
520	0.0008752	1049	1535	71	2021
521	0.0007973	1169	1633	90	2097
522	0.0009011	1863	2175	88	2487
523	0.0008804	940	1523	82	2106
524	0.0008172	1096	1606	83	2116
525	0.0008578	1108	1651	96	2194
526	0.0009083	1641	1965	81	2289
527	0.0008139	846	1371	58	1896
528	0.0009078	568	1164	75	1760
529	0.0007759	1563	1928	79	2293
530	0.0007987	1554	1921	87	2288
531	0.0009592	422	1110	72	1798
532	0.0008302	1403	1842	74	2281
533	0.0010166	1519	1869	71	2219
534	0.0008755	1433	1855	77	2277
535	0.0009873	1210	1695	63	2180
536	0.0008591	1346	1696	77	2046
537	0.0008375	798	1308	63	1818
538	0.0008467	709	1288	93	1867
539	0.0008742	1475	1869	82	2263
540	0.000762	1508	1933	85	2358
541	0.0007974	1732	2065	82	2398
542	0.0007124	2015	2318	91	2621
543	0.0008102	1443	1826	67	2209
544	0.00082	966	1460	71	1954
545	0.0008082	1600	1989	84	2378
546	0.0009444	757	1324	51	1891
547	0.0009042	1654	2075	89	2496
548	0.0008162	1826	2200	75	2574
549	0.0007662	1468	1855	98	2242
550	0.0008857	941	1488	77	2035
551	0.0007675	1917	2221	90	2525
552	0.0008831	1062	1576	92	2090
553	0.0009267	1084	1501	70	1918
554	0.0008711	1130	1583	75	2036
555	0.0007758	1642	2036	85	2430
556	0.0008544	1275	1666	78	2035
557	0.0007698	1412	1794	93	2176
558	0.0008747	890	1502	84	2114
559	0.0008265	1122	1585	65	2048
560	0.0007676	1702	1972	84	2242
561	0.0007962	1667	2084	94	2424
562	0.0007831	1806	2146	83	2486
563	0.0008066	1394	1791	80	2188
564	0.000802	1154	1575	80	1996
565	0.0007348	1843	2166	89	2489
566	0.0008075	1284	1693	76	2102
567	0.0007948	1658	1979	92	2300
568	0.0008274	1445	1874	85	2303
569	0.0008776	1350	1776	93	2202
570	0.0008549	1224	1719	82	2214
571	0.0007252	1261	1670	99	2079
572	0.0008302	1267	1663	92	2059
573	0.0007906	1473	1859	77	2245
574	0.000841	718	1238	71	1758
575	0.00083	787	1366	77	1945
576	0.0009046	749	1279	83	1809
577	0.0008422	1536	1899	80	2262
578	0.0008539	1329	1722	69	2115
579	0.0007809	1597	1957	93	2317
580	0.0008141	1637	1981	78	2325
581	0.0008733	1304	1697	78	2090
582	0.0008523	919	1466	59	2013
583	0.0008952	1214	1658	62	2102
584	0.0008465	1832	2149	80	2466
585	0.0008255	1399	1780	87	2161
586	0.0008062	1331	1781	86	2231
587	0.0008041	1793	2207	90	2621
588	0.0009054	937	1534	66	2131
589	0.000949	189	1023	83	1857
590	0.0007889	1681	2097	87	2513
591	0.000901	858	1414	71	1970
592	0.0007551	1677	2029	76	2381
593	0.000908	1384	1791	83	2198
594	0.0008619	1840	2185	96	2530
595	0.0008896	1157	1636	75	2115
596	0.0007546	1229	1637	81	2045
597	0.0007283	1885	2203	89	2521
598	0.0012195	1087	1584	81	2081
599	0.0009728	947	1440	65	1933
600	0.0008256	719	1266	61	1813
601	0.0007682	1858	2216	89	2574
602	0.0009656	63	925	58	1787
603	0.0008902	1231	1687	88	2143
604	0.0007867	1497	1914	84	2331
605	0.0008374	1378	1795	90	2212
606	0.0007128	1855	2134	83	2413
607	0.0009254	1199	1635	95	2071
608	0.0007588	1566	1940	79	2314
609	0.000846	1047	1587	84	2127
610	0.0009078	1341	1794	81	2247
611	0.0007914	2190	2470	94	2750
612	0.0009228	1374	1769	94	2164
613	0.0007546	1705	2059	90	2413
614	0.0007604	1543	1905	82	2267
615	0.0008917	691	1324	61	1957
616	0.0007788	1402	1772	85	2103
617	0.0008437	1175	1650	82	2125
618	0.000803	1172	1565	71	1958
619	0.0010611	656	1288	68	1920
620	0.0007628	1164	1606	77	2048
621	0.0007312	1611	1926	80	2241
622	0.0008786	1608	2014	63	2420
623	0.0008016	1258	1728	90	2198
624	0.0008328	438	1077	46	1716
625	0.0008427	671	1284	93	1897
626	0.0008	1736	2050	92	2364
627	0.0008625	1191	1629	86	2058
628	0.0007659	1896	2206	86	2477
629	0.000835	982	1508	74	2034
630	0.0009007	1071	1507	76	1943
631	0.0009406	62	879	75	1696
632	0.0008144	1535	1956	75	2377
633	0.0009096	1137	1710	80	2283
634	0.0014221	1940	2302	85	2664
635	0.0008548	1309	1720	73	2115
636	0.0008347	1580	1948	76	2316
637	0.0007935	1248	1683	82	2118
638	0.0009094	617	1269	73	1891
639	0.000936	632	1181	49	1730
640	0.0008483	1747	2094	81	2441
641	0.0008349	1765	2112	76	2459
642	0.0008454	1186	1640	80	2094
643	0.0008417	980	1542	87	2104
644	0.00091	1523	1876	85	2229
645	0.0009516	301	1051	43	1801
646	0.0008831	322	1087	64	1852
647	0.000854	859	1433	64	2007
648	0.0008734	1098	1600	66	2102
649	0.000884	955	1489	78	1993
650	0.0008982	1097	1588	68	2069
651	0.0008664	1520	1938	76	2356
652	0.0007642	2038	2408	93	2778
653	0.0008309	635	1171	69	1707
654	0.0007996	1510	1887	65	2264
655	0.000839	1154	1615	66	2076
656	0.0007951	1433	1828	94	2223
657	0.0007624	1314	1696	92	2078
658	0.0008928	968	1486	63	2004
659	0.0009306	386	1090	57	1794
660	0.0008812	706	1271	65	1836
661	0.00083	1133	1611	81	2089
662	0.0008569	1292	1741	87	2190
663	0.0008147	539	1122	87	1705
664	0.0008663	1249	1635	82	2021
665	0.0008877	995	1557	65	2050
666	0.0008941	1352	1822	93	2292
667	0.0008171	1385	1757	84	2129
668	0.0008367	1491	1830	87	2169
669	0.0009042	903	1482	81	2061
670	0.0008163	1679	2026	86	2373
671	0.0008285	1128	1662	82	2196
672	0.0008369	1438	1898	70	2358
673	0.0007859	1441	1802	83	2163
674	0.0008362	1129	1597	73	2065
675	0.0008887	994	1464	60	1934
676	0.0007593	1897	2229	94	2561
677	0.0008275	1369	1747	73	2125
678	0.0007952	1527	1888	99	2249
679	0.0008493	919	1415	55	1911
680	0.0008799	250	1022	55	1794
681	0.0008371	1055	1587	75	2119
682	0.0008782	624	1234	46	1844
683	0.0008988	1047	1502	75	1957
684	0.0008702	1005	1447	80	1889
685	0.0008423	960	1493	73	2026
686	0.0009023	634	1302	84	1970
687	0.0008555	1185	1635	80	2085
688	0.0009101	776	1394	82	2012
689	0.001111	48	951	79	1854
690	0.0008015	1808	2150	82	2492
691	0.0008776	1033	1506	81	1979
692	0.0008741	1054	1524	61	1994
693	0.0008933	1306	1726	98	2146
694	0.0008536	1257	1648	71	2039
695	0.0007676	1254	1615	83	1976
696	0.0007746	1927	2255	98	2583
697	0.0007685	1654	1984	95	2314
698	0.0009787	715	1357	75	1999
699	0.0009406	1306	1760	68	2214
700	0.0009059	1656	2018	84	2323
701	0.0008418	609	1195	53	1781
702	0.000721	1615	1959	85	2303
703	0.0008204	1640	2060	87	2440
704	0.0008152	1530	1881	89	2232
705	0.0009082	579	1288	59	1997
706	0.0008403	1111	1643	81	2175
707	0.0007922	1246	1658	91	2070
708	0.0008559	1078	1623	80	2168
709	0.0008191	1247	1665	64	2083
710	0.0007964	1510	1872	89	2234
711	0.000788	1757	2080	76	2403
712	0.0008049	1503	1871	88	2209
713	0.0007991	1747	2113	78	2479
714	0.0009745	504	1262	53	2020
715	0.0009136	640	1279	59	1918
716	0.0006889	1969	2223	92	2477
717	0.0007564	864	1333	75	1802
718	0.0007944	1222	1628	73	2034
719	0.0008876	1734	2128	91	2522
720	0.0007126	1988	2293	93	2598
721	0.0007939	1237	1760	70	2283
722	0.000843	1385	1826	79	2267
723	0.0008788	859	1361	83	1863
724	0.0007643	1664	2048	93	2432
725	0.0007475	1401	1839	74	2277
726	0.0010678	1487	1889	78	2291
727	0.0008051	1532	1911	92	2290
728	0.0007824	1617	1957	89	2297
729	0.0008265	1306	1763	84	2220
730	0.0009381	1239	1676	89	2113
731	0.0008549	1715	2075	81	2435
732	0.0007194	1820	2112	90	2404
733	0.0008118	1527	1949	77	2371
734	0.0008468	1202	1635	75	2068
735	0.0008348	649	1309	79	1969
736	0.0008121	1654	2028	71	2402
737	0.0008375	1222	1674	74	2126
738	0.0007499	1427	1797	92	2167
739	0.0007688	1456	1914	77	2372
740	0.0009205	1032	1628	79	2224
741	0.0010031	739	1379	81	2019
742	0.0008784	1379	1823	88	2267
743	0.0008233	1198	1663	54	2128
744	0.00094	677	1202	57	1727
745	0.0007966	1649	1924	88	2199
746	0.000902	1481	1857	86	2219
747	0.0009143	686	1278	66	1870
748	0.0008425	1111	1588	73	2065
749	0.0009181	1272	1677	71	2082
750	0.0008721	1198	1718	74	2222
751	0.0007634	1453	1867	83	2281
752	0.0008464	1408	1774	73	2140
753	0.0008072	1164	1609	90	2054
754	0.0008784	1194	1684	64	2174
755	0.0008102	906	1448	87	1990
756	0.0009515	1069	1556	74	2043
757	0.0008173	1171	1624	73	2077
758	0.0007075	1651	1960	72	2269
759	0.0006863	2018	2285	84	2552
760	0.0007721	1327	1743	93	2159
761	0.0008328	777	1311	62	1845
762	0.000863	1703	2053	90	2403
763	0.0008008	1688	2053	74	2418
764	0.0010449	325	1115	65	1905
765	0.0008528	1172	1636	92	2100
766	0.000753	2253	2492	94	2731
767	0.0009273	1144	1641	80	2138
768	0.0007772	1320	1798	84	2276
769	0.0008023	1005	1585	74	2165
770	0.0007883	1958	2268	93	2578
771	0.0008378	1233	1648	71	2063
772	0.0008154	1789	2087	86	2385
773	0.0008292	929	1443	68	1957
774	0.0008085	1029	1425	71	1821
775	0.0008498	1562	1953	84	2344
776	0.0008775	1155	1683	66	2211
777	0.0008529	916	1454	54	1992
778	0.000894	1163	1612	76	2061
779	0.0008712	987	1456	65	1925
780	0.000796	1404	1746	95	2088
781	0.0007829	1882	2213	93	2544
782	0.0009046	1196	1608	82	2020
783	0.0009204	1648	1969	85	2290
784	0.0007498	1413	1799	72	2185
785	0.000877	1037	1486	78	1935
786	0.0008143	1838	2194	94	2550
787	0.0007813	1930	2225	94	2520
788	0.0007647	1480	1876	85	2272
789	0.0007578	1470	1828	93	2186
790	0.000819	1129	1607	70	2085
791	0.0009812	543	1181	76	1819
792	0.0008354	1015	1473	60	1931
793	0.0007443	1470	1810	70	2150
794	0.00084	1235	1637	76	2039
795	0.0008537	1166	1665	76	2130
796	0.000862	900	1429	90	1958
797	0.0007859	1414	1759	83	2104
798	0.0009114	792	1337	86	1882
799	0.0008451	1432	1867	84	2302
800	0.0008918	1270	1726	90	2182
801	0.0010424	590	1238	81	1886
802	0.0009353	1234	1654	79	2074
803	0.0009106	923	1416	75	1909
804	0.0008461	278	1008	53	1738
805	0.0008165	1411	1766	67	2121
806	0.0007547	1925	2202	74	2479
807	0.0009476	761	1400	77	2039
808	0.0008332	1002	1496	65	1990
809	0.0009052	1124	1663	72	2202
810	0.0009559	892	1491	74	2090
811	0.0007307	2266	2577	93	2888
812	0.0007402	1444	1830	95	2216
813	0.0008189	1396	1839	73	2230
814	0.000845	988	1458	69	1928
815	0.0007523	1567	1931	92	2295
816	0.0009267	941	1421	57	1901
817	0.0008526	1218	1612	88	2006
818	0.0008833	2004	2300	94	2596
819	0.0008369	887	1357	51	1827
820	0.0008495	442	1056	56	1670
821	0.0008025	1929	2251	91	2573
822	0.0008585	725	1313	78	1901
823	0.0008316	1937	2265	96	2593
824	0.0008463	1367	1791	76	2215
825	0.0008049	761	1277	56	1793
826	0.0008521	1134	1595	67	2056
827	0.0008329	1786	2119	95	2434
828	0.0008265	957	1455	67	1953
829	0.0007773	1573	1895	77	2201
830	0.0008113	1347	1821	90	2295
831	0.0008408	1524	1922	94	2320
832	0.0009995	442	1143	76	1844
833	0.0008109	1390	1787	91	2184
834	0.0008493	918	1456	69	1994
835	0.000802	2055	2369	95	2683
836	0.0009431	960	1456	54	1952
837	0.0008384	1588	2013	86	2394
838	0.0008292	659	1246	93	1833
839	0.000807	1339	1747	68	2155
840	0.0007164	2431	2652	87	2873
841	0.0008912	749	1353	95	1957
842	0.000861	797	1421	70	2045
843	0.0008675	1454	1820	69	2186
844	0.0007467	1703	2015	81	2327
845	0.0008583	1516	1900	74	2284
846	0.0007563	1373	1811	91	2249
847	0.0007818	1511	1940	90	2369
848	0.0008088	1483	1868	78	2253
849	0.0008002	1756	2122	87	2488
850	0.0007333	1936	2225	76	2514
851	0.0008552	967	1403	69	1839
852	0.0007401	1900	2232	94	2564
853	0.0008678	1766	2078	73	2390
854	0.0008984	878	1419	82	1960
855	0.0007595	1372	1788	83	2204
856	0.000953	437	1140	73	1843
857	0.0008402	1524	1955	86	2386
858	0.0008831	1233	1638	82	2043
859	0.0008131	1486	1853	80	2220
860	0.0008938	266	1041	49	1816
861	0.0007598	1903	2199	81	2495
862	0.0007323	1179	1586	70	1993
863	0.0008534	500	1141	61	1782
864	0.0008772	1743	2071	82	2399
865	0.0008366	746	1358	60	1970
866	0.0008422	1048	1528	75	2008
867	0.0009056	767	1360	71	1953
868	0.0007777	1876	2220	92	2564
869	0.0009895	342	1039	67	1736
870	0.0008195	1061	1507	84	1953
871	0.0008766	1284	1706	82	2128
872	0.0008335	1333	1733	61	2133
873	0.0008559	883	1454	92	2025
874	0.0007461	2162	2428	82	2694
875	0.0009168	1064	1511	62	1958
876	0.0008353	1234	1697	89	2160
877	0.0009174	905	1362	82	1819
878	0.000858	1529	1909	66	2289
879	0.0008999	1135	1615	83	2095
880	0.0007892	1195	1605	59	2015
881	0.0008795	1200	1669	88	2138
882	0.0007474	1689	2041	79	2393
883	0.0008762	817	1411	45	2005
884	0.0009229	684	1326	79	1968
885	0.0008361	1336	1764	85	2192
886	0.0008093	1867	2162	86	2457
887	0.0008403	1666	1987	97	2308
888	0.0007781	865	1388	76	1911
889	0.0007872	1390	1815	94	2240
890	0.0009196	606	1250	74	1894
891	0.0008106	868	1455	67	2042
892	0.000792	1141	1640	81	2139
893	0.0008636	1400	1811	83	2222
894	0.0008275	1239	1647	89	2055
895	0.0008924	1407	1872	87	2337
896	0.0008943	1103	1563	65	2019
897	0.0007484	1840	2178	84	2516
898	0.0009691	1625	1995	89	2365
899	0.0008228	1225	1621	96	2017
900	0.0008306	616	1229	69	1842
901	0.0009086	1580	1932	93	2284
902	0.000747	1842	2167	95	2492
903	0.0009363	466	1080	53	1687
904	0.0009773	130	893	57	1656
905	0.0007862	1008	1495	75	1982
906	0.0009816	1059	1573	91	2087
907	0.000787	1649	2037	81	2425
908	0.0007464	1843	2204	98	2565
909	0.0008675	1227	1646	71	2065
910	0.000795	1306	1695	78	2084
911	0.0009432	675	1265	61	1855
912	0.0008943	884	1392	65	1900
913	0.0008051	1264	1728	93	2192
914	0.0008394	991	1448	77	1905
915	0.0008435	873	1321	86	1769
916	0.0009866	1388	1807	80	2226
917	0.0008923	713	1332	71	1951
918	0.0007899	918	1415	65	1912
919	0.0009246	889	1424	50	1959
920	0.0010694	1107	1564	82	2021
921	0.0009005	546	1158	78	1770
922	0.0007584	1393	1808	91	2223
923	0.0007405	1853	2163	73	2473
924	0.0007577	1397	1824	73	2251
925	0.000886	976	1505	67	2034
926	0.0008044	1264	1697	68	2130
927	0.0008566	1036	1519	81	2002
928	0.0007676	1557	1938	86	2319
929	0.0008902	959	1485	67	2011
930	0.0010579	1401	1839	68	2277
931	0.0009182	1492	1884	86	2276
932	0.0008295	1264	1673	75	2082
933	0.0008029	1754	2105	88	2456
934	0.0007957	1317	1682	64	2047
935	0.0008044	1719	2047	76	2375
936	0.0007828	1686	1980	77	2274
937	0.0007486	1774	2092	84	2410
938	0.000877	964	1491	83	2018
939	0.0008471	1341	1764	79	2187
940	0.0008379	1236	1676	79	2116
941	0.0009254	965	1459	82	1953
942	0.0009363	1139	1664	72	2189
943	0.0008011	1143	1602	57	2061
944	0.0007699	1077	1513	54	1949
945	0.0008614	1234	1726	74	2199
946	0.0008327	1135	1580	73	2025
947	0.0009405	1073	1583	60	2093
948	0.0008084	1183	1717	67	2251
949	0.0009118	796	1366	73	1936
950	0.0008065	1391	1786	72	2181
951	0.00081	1589	1968	89	2347
952	0.0008104	1309	1711	91	2113
953	0.0007099	2262	2498	87	2734
954	0.000745	1648	1998	68	2348
955	0.0008009	1227	1664	72	2101
956	0.0008766	999	1470	71	1941
957	0.0009936	157	933	51	1709
958	0.0009601	180	954	37	1728
959	0.0008889	1309	1829	75	2161
960	0.0009496	1205	1645	88	2085
961	0.0008115	913	1383	59	1853
962	0.0008935	1164	1720	73	2276
963	0.00071	2001	2295	94	2589
964	0.0009104	0	897	84	1794
965	0.0008527	1296	1750	78	2204
966	0.0008434	1399	1816	90	2233
967	0.0008487	794	1438	87	2082
968	0.0008344	1565	1911	63	2257
969	0.0007028	2113	2415	96	2717
970	0.0007955	1089	1578	80	2067
971	0.0009014	892	1473	60	2054
972	0.0008412	1369	1732	93	2095
973	0.0007932	715	1257	81	1799
974	0.0008393	829	1393	59	1957
975	0.0007386	2158	2438	90	2716
976	0.0008357	1313	1713	77	2084
977	0.0008045	1330	1743	81	2156
978	0.000837	1199	1632	75	2065
979	0.0008485	1240	1715	77	2190
980	0.0007619	1734	2047	95	2360
981	0.0010744	817	1377	69	1937
982	0.0011681	1197	1658	58	2119
983	0.0007519	2152	2472	89	2792
984	0.0007158	1981	2325	88	2669
985	0.0008157	1455	1916	95	2377
986	0.0008469	1308	1702	66	2096
987	0.0007719	1702	2054	94	2406
988	0.0008868	1156	1605	71	2054
989	0.0007822	1768	2049	91	2330
990	0.0009965	1151	1610	78	2040
991	0.0007966	1716	2052	75	2388
992	0.0008624	1029	1449	92	1869
993	0.0007386	1597	1954	90	2311
994	0.0008399	892	1403	76	1914
995	0.0008194	1028	1519	86	2010
996	0.0007424	1596	1965	90	2334
997	0.000877	477	1138	80	1799
998	0.0008027	1545	1948	76	2351
999	0.0007713	1205	1616	65	2027
mean	0.000841443	1259.39	1709.53	78.276	2157.64

## Sheet: PolyMin_SEq
	time	SEq	Bal	Reg	Egal
0	0.0060939	231	919	48	1607
1	0.0066586	162	930	60	1698
2	0.0061179	15	902	41	1789
3	0.0068364	257	970	55	1683
4	0.0063214	86	940	59	1794
5	0.0060714	394	1034	47	1674
6	0.0063082	106	909	61	1712
7	0.0062467	20	884	46	1748
8	0.0060677	65	891	51	1717
9	0.0061884	21	841	35	1661
10	0.0069153	273	984	47	1695
11	0.0067126	86	921	50	1756
12	0.0059975	56	825	45	1594
13	0.005579	24	870	50	1716
14	0.0056324	40	863	46	1686
15	0.0067894	361	1149	66	1937
16	0.0060662	28	907	54	1786
17	0.0063887	253	979	69	1705
18	0.0070968	145	1002	52	1859
19	0.0065064	755	1254	90	1753
20	0.0055423	406	1033	45	1660
21	0.0068615	67	947	49	1827
22	0.0058255	103	935	50	1767
23	0.0064558	193	1014	42	1835
24	0.0062903	245	1010	40	1775
25	0.006748	52	865	56	1678
26	0.0074712	221	949	61	1677
27	0.0067092	36	904	50	1772
28	0.006518	56	887	48	1718
29	0.0060811	52	935	42	1818
30	0.0057976	273	974	50	1675
31	0.0054818	213	934	43	1655
32	0.0053954	85	910	39	1735
33	0.0069893	399	1093	63	1787
34	0.0055223	9	824	55	1639
35	0.0055707	177	938	44	1699
36	0.0063476	135	926	61	1717
37	0.0060023	67	904	44	1741
38	0.0057241	225	964	61	1703
39	0.0062841	114	969	41	1824
40	0.0058053	264	998	64	1732
41	0.0061778	81	836	53	1591
42	0.006636	72	891	43	1710
43	0.0069094	20	979	54	1938
44	0.0060284	16	900	37	1784
45	0.0062606	173	941	37	1709
46	0.0059232	206	938	50	1670
47	0.0065941	41	998	50	1955
48	0.0064968	74	838	33	1602
49	0.0055509	32	811	46	1590
50	0.0056959	235	918	39	1601
51	0.0071849	149	992	58	1835
52	0.0059041	218	933	61	1648
53	0.0060623	41	832	40	1623
54	0.0063482	106	900	57	1694
55	0.0071842	176	947	48	1718
56	0.0073075	267	965	49	1663
57	0.0069525	182	1022	61	1862
58	0.0078473	221	1010	46	1799
59	0.0060895	231	970	46	1709
60	0.0052524	187	986	44	1785
61	0.0055932	104	903	35	1702
62	0.0064095	85	961	47	1837
63	0.0052619	40	863	66	1686
64	0.0057952	106	934	53	1762
65	0.0048727	283	986	47	1689
66	0.0067613	47	853	44	1659
67	0.0066325	339	1026	70	1713
68	0.0058266	419	1058	52	1697
69	0.006669	85	981	48	1877
70	0.0068036	257	1044	50	1831
71	0.0064052	155	911	47	1667
72	0.0069612	87	901	42	1715
73	0.0065703	11	919	41	1827
74	0.0071309	482	1103	41	1724
75	0.0062737	15	866	43	1717
76	0.0067365	594	1218	38	1842
77	0.0065986	247	1042	56	1837
78	0.0072573	3	942	48	1881
79	0.0068652	18	862	51	1706
80	0.0068617	26	926	45	1826
81	0.0074497	84	952	49	1820
82	0.0071338	129	975	39	1821
83	0.0054785	639	1192	67	1745
84	0.0049064	44	883	43	1722
85	0.0065095	294	1033	74	1772
86	0.0075816	152	954	38	1756
87	0.0068295	37	845	38	1653
88	0.006106	153	962	51	1771
89	0.0054382	157	945	64	1733
90	0.0064645	11	893	40	1775
91	0.0067434	128	1003	50	1878
92	0.0048696	84	944	51	1804
93	0.0060213	77	848	45	1619
94	0.0067676	8	852	50	1696
95	0.0070149	210	966	53	1722
96	0.0079122	117	887	62	1657
97	0.0064684	12	812	42	1612
98	0.0066065	22	977	55	1932
99	0.0057168	35	870	49	1705
100	0.0062019	313	1004	41	1695
101	0.0057381	39	844	43	1649
102	0.0068341	184	972	66	1760
103	0.0055025	353	1143	55	1933
104	0.0065303	209	1000	45	1791
105	0.0064406	311	1008	53	1705
106	0.0054854	130	905	53	1680
107	0.0063675	301	1030	45	1759
108	0.0072289	150	965	40	1780
109	0.0066497	68	911	64	1754
110	0.005904	333	1033	53	1733
111	0.0054738	62	892	56	1722
112	0.0064036	363	1055	52	1747
113	0.0053261	4	795	44	1586
114	0.005697	325	1039	52	1753
115	0.0070027	256	1017	40	1778
116	0.0058348	98	971	60	1844
117	0.0064162	49	823	36	1597
118	0.0061401	253	966	40	1679
119	0.0073791	29	871	54	1713
120	0.0073408	255	985	49	1715
121	0.0068682	511	1127	42	1743
122	0.0062232	66	856	42	1646
123	0.0065523	144	859	40	1574
124	0.0067671	156	948	59	1740
125	0.0055561	170	1009	39	1848
126	0.0070173	192	1009	42	1826
127	0.0067676	25	836	33	1647
128	0.0049977	18	878	63	1738
129	0.0066012	69	945	40	1821
130	0.0069955	217	979	50	1741
131	0.0055678	192	930	34	1668
132	0.0068667	239	1048	49	1857
133	0.0056243	68	920	65	1772
134	0.0065945	64	896	44	1728
135	0.005891	435	1121	76	1807
136	0.00687	136	926	42	1716
137	0.0059972	83	922	43	1761
138	0.0057062	60	959	50	1858
139	0.0058745	3	899	45	1795
140	0.0071065	30	908	41	1786
141	0.005614	83	863	53	1643
142	0.0056433	341	1095	45	1849
143	0.005812	105	928	47	1751
144	0.0057945	297	1030	39	1763
145	0.0062362	89	955	46	1821
146	0.0053361	83	895	58	1707
147	0.006218	504	1202	79	1900
148	0.0057445	241	1006	52	1771
149	0.0073544	77	996	38	1915
150	0.0073195	152	937	64	1722
151	0.0068054	15	923	35	1831
152	0.0064601	111	950	50	1789
153	0.0058993	120	817	43	1514
154	0.0066847	12	853	67	1694
155	0.006589	323	1022	45	1721
156	0.0063562	47	877	53	1707
157	0.0065848	13	829	60	1645
158	0.0060947	19	747	41	1475
159	0.0070099	100	937	55	1774
160	0.0062658	24	869	47	1714
161	0.0061581	78	799	31	1520
162	0.0058794	192	1017	44	1842
163	0.0063272	254	977	47	1700
164	0.0064567	451	1099	40	1747
165	0.0056513	26	824	41	1622
166	0.0055109	37	833	37	1629
167	0.0057702	189	1002	45	1815
168	0.0068594	148	925	60	1702
169	0.0063216	322	1073	44	1824
170	0.0064776	6	914	64	1822
171	0.0064437	355	1094	56	1833
172	0.0061738	180	934	38	1688
173	0.0058687	59	883	42	1707
174	0.0061807	335	1150	48	1965
175	0.0057475	118	881	52	1644
176	0.0063952	263	961	38	1659
177	0.0058508	299	1058	44	1817
178	0.0067462	58	917	51	1776
179	0.0055386	7	826	45	1645
180	0.0064126	39	990	45	1941
181	0.0074373	260	1023	35	1786
182	0.0053948	59	796	35	1533
183	0.0070346	130	1007	57	1884
184	0.0055176	289	964	49	1639
185	0.0064361	109	943	52	1777
186	0.0064116	88	886	39	1684
187	0.0072664	36	1005	47	1974
188	0.0059851	17	851	50	1685
189	0.0073827	376	1094	50	1812
190	0.0055683	50	900	41	1750
191	0.0049077	44	837	57	1630
192	0.0062337	59	920	51	1781
193	0.0055408	25	922	41	1819
194	0.0055893	129	890	48	1651
195	0.0057665	190	960	42	1730
196	0.00581	14	895	40	1776
197	0.0063475	3	830	42	1657
198	0.0054722	118	927	48	1736
199	0.0062719	290	961	44	1632
200	0.0064364	150	960	39	1770
201	0.0057363	49	854	40	1659
202	0.0066159	162	936	39	1710
203	0.0060316	31	881	51	1731
204	0.006754	169	1013	50	1857
205	0.0050297	160	921	56	1682
206	0.006314	237	1037	45	1837
207	0.0065154	24	883	46	1742
208	0.0064283	31	867	44	1703
209	0.0061086	260	975	40	1690
210	0.0074701	53	938	41	1823
211	0.0068739	162	971	48	1780
212	0.0065997	170	1005	60	1840
213	0.0064827	10	817	44	1624
214	0.0060786	1	878	49	1755
215	0.0059915	213	923	47	1633
216	0.0061657	389	1138	43	1887
217	0.005415	201	934	52	1667
218	0.0059296	314	1059	52	1804
219	0.0065066	329	1112	67	1895
220	0.0062799	50	873	40	1696
221	0.0060672	57	870	48	1683
222	0.0066969	61	920	56	1779
223	0.0068106	496	1178	47	1860
224	0.0066839	340	1060	53	1780
225	0.0071251	20	837	52	1654
226	0.0057423	140	919	51	1698
227	0.0056788	244	1020	72	1796
228	0.0066297	300	1120	53	1940
229	0.0058102	22	853	57	1684
230	0.0063017	245	1001	44	1757
231	0.0069373	53	937	40	1821
232	0.008076	369	1081	52	1793
233	0.0062377	397	1074	60	1751
234	0.0069071	5	911	52	1817
235	0.0077518	139	978	85	1817
236	0.0065203	249	1021	58	1793
237	0.0066198	160	909	44	1658
238	0.0074249	34	887	37	1740
239	0.0059023	294	1059	53	1824
240	0.0059081	41	851	47	1661
241	0.0059241	75	939	44	1803
242	0.0067698	84	866	58	1648
243	0.0068677	127	997	60	1867
244	0.0058686	230	1001	46	1772
245	0.0064098	192	962	40	1732
246	0.0067271	73	942	64	1811
247	0.0068007	107	979	43	1851
248	0.0054299	172	919	40	1666
249	0.006124	261	1042	44	1823
250	0.0065168	238	993	43	1748
251	0.0066344	84	910	51	1736
252	0.0061903	153	988	51	1823
253	0.0081735	141	877	54	1613
254	0.0066922	132	880	40	1628
255	0.0066568	256	1004	40	1752
256	0.0060583	287	922	59	1557
257	0.0060999	199	955	55	1711
258	0.0059682	282	1051	52	1820
259	0.0062754	35	934	58	1833
260	0.0068653	249	1050	58	1851
261	0.0067255	225	982	46	1739
262	0.0070351	14	899	48	1784
263	0.0063874	58	888	57	1718
264	0.0060007	13	908	51	1803
265	0.0067292	11	935	37	1859
266	0.0065353	77	894	55	1711
267	0.0069587	127	971	60	1815
268	0.0057302	84	917	58	1750
269	0.0063845	32	873	54	1714
270	0.0065125	80	925	38	1770
271	0.0069161	24	853	42	1682
272	0.0065814	44	834	47	1624
273	0.0070738	176	956	81	1736
274	0.0058527	366	1034	45	1702
275	0.006292	95	854	39	1613
276	0.0058266	112	925	44	1738
277	0.006754	46	831	54	1616
278	0.0059644	83	869	34	1655
279	0.0065056	295	939	65	1583
280	0.0068936	30	926	54	1822
281	0.0056355	148	930	33	1712
282	0.0075147	25	914	49	1803
283	0.0064068	39	886	50	1733
284	0.0072927	87	906	46	1725
285	0.0061254	16	855	45	1694
286	0.0059772	163	1060	62	1957
287	0.0082735	137	979	51	1821
288	0.0060028	151	879	44	1607
289	0.0060633	26	819	37	1612
290	0.006922	173	933	40	1693
291	0.0054338	116	929	45	1742
292	0.0057394	88	968	43	1848
293	0.0061478	32	839	36	1646
294	0.0064614	151	1019	46	1887
295	0.0063413	66	876	52	1686
296	0.0059247	1	807	46	1613
297	0.0068644	174	972	52	1770
298	0.0075989	117	910	50	1703
299	0.0073506	151	995	77	1839
300	0.0070607	225	1033	55	1841
301	0.0070016	261	991	41	1721
302	0.0068303	7	938	43	1869
303	0.0058123	4	858	48	1712
304	0.0055034	42	840	45	1638
305	0.0074444	150	999	54	1848
306	0.0052884	37	918	52	1799
307	0.0069342	13	873	62	1733
308	0.0055591	55	929	47	1803
309	0.0068799	450	1156	52	1862
310	0.0072537	128	952	44	1776
311	0.0064516	52	931	42	1810
312	0.0069151	120	904	43	1688
313	0.0066795	13	877	51	1741
314	0.0060509	16	938	52	1860
315	0.0068242	47	889	44	1731
316	0.0062868	100	963	50	1826
317	0.0065575	301	999	54	1697
318	0.0060509	195	945	48	1695
319	0.0062795	50	879	57	1708
320	0.0060814	244	947	56	1650
321	0.0065656	16	861	52	1706
322	0.0061961	80	939	44	1798
323	0.0067701	25	922	46	1819
324	0.0066557	59	959	39	1859
325	0.0060526	174	960	45	1746
326	0.0065657	62	868	49	1674
327	0.0063626	113	899	52	1685
328	0.0059807	64	889	54	1714
329	0.0053853	92	913	56	1734
330	0.0067287	160	924	47	1688
331	0.0060983	208	958	52	1708
332	0.0068281	120	930	56	1740
333	0.0059684	487	1145	54	1803
334	0.0066408	230	1006	37	1782
335	0.0068538	368	1043	37	1718
336	0.0067926	151	960	55	1769
337	0.0066247	133	987	45	1841
338	0.0067873	35	885	51	1735
339	0.0056455	133	921	58	1709
340	0.005839	54	855	40	1656
341	0.006677	122	954	38	1786
342	0.0065831	63	907	52	1751
343	0.0051425	116	924	53	1732
344	0.0059504	375	1119	64	1863
345	0.0070263	20	896	34	1772
346	0.0067185	31	881	42	1731
347	0.0068436	279	1031	78	1783
348	0.0067818	382	1095	41	1808
349	0.0069976	58	906	38	1754
350	0.0065423	17	838	45	1659
351	0.00652	327	1062	40	1797
352	0.0063923	376	1065	58	1754
353	0.0068759	113	907	46	1701
354	0.0072127	137	926	48	1715
355	0.0062598	213	906	54	1599
356	0.0060412	133	927	45	1721
357	0.0066295	42	859	46	1676
358	0.0060792	89	865	48	1641
359	0.0071553	149	1068	55	1987
360	0.0066416	92	1013	50	1934
361	0.0068855	421	1129	53	1837
362	0.0076826	447	1173	45	1899
363	0.0060635	5	856	53	1707
364	0.0055617	196	964	53	1732
365	0.0068339	78	851	42	1624
366	0.0063901	25	848	60	1671
367	0.0062672	229	1012	60	1795
368	0.006964	222	957	50	1692
369	0.0067175	362	1069	43	1776
370	0.0071628	69	907	42	1745
371	0.0060699	22	916	52	1810
372	0.0063966	323	1097	73	1871
373	0.0050097	45	882	37	1719
374	0.0070184	31	946	38	1861
375	0.0055888	391	999	37	1607
376	0.0060329	102	850	55	1598
377	0.006432	103	897	41	1691
378	0.0069454	40	970	45	1900
379	0.0060757	67	935	58	1803
380	0.0062308	46	904	53	1762
381	0.0056632	107	987	69	1867
382	0.0061717	61	890	46	1719
383	0.0062419	239	965	40	1691
384	0.0058317	126	1020	53	1914
385	0.0062691	182	1073	61	1964
386	0.0053039	23	894	55	1765
387	0.0066588	232	930	62	1628
388	0.0072316	230	1023	61	1816
389	0.0062707	22	847	41	1672
390	0.0074562	157	980	61	1803
391	0.0073399	76	896	48	1716
392	0.0069031	35	948	57	1861
393	0.0059452	29	875	43	1721
394	0.0058598	91	926	48	1761
395	0.0062452	82	918	46	1754
396	0.0067976	32	903	42	1774
397	0.005229	476	1141	52	1806
398	0.0069742	28	957	45	1886
399	0.0067674	528	1154	51	1780
400	0.00593	117	943	57	1769
401	0.0060309	209	962	39	1715
402	0.0063312	50	926	48	1802
403	0.00712	68	919	42	1770
404	0.0069318	366	1141	53	1916
405	0.0062286	251	929	47	1607
406	0.0075488	93	922	49	1751
407	0.0057877	260	997	47	1734
408	0.0068625	151	1010	52	1869
409	0.0057654	471	1174	43	1877
410	0.0060301	306	980	54	1654
411	0.006329	145	908	41	1671
412	0.0057129	169	983	36	1797
413	0.0063537	407	1117	56	1827
414	0.0067976	189	958	35	1727
415	0.0058409	155	875	46	1595
416	0.0058696	38	875	36	1712
417	0.0066671	104	948	46	1792
418	0.0052204	20	874	52	1728
419	0.005539	52	823	32	1594
420	0.0058775	236	1009	46	1782
421	0.0053976	45	921	53	1797
422	0.0055166	257	1010	55	1763
423	0.0064367	176	1024	70	1872
424	0.0061919	11	868	39	1725
425	0.0060672	73	931	61	1789
426	0.0060857	347	1037	89	1727
427	0.0069773	372	1150	48	1928
428	0.0052652	441	1101	34	1761
429	0.0058345	51	898	50	1745
430	0.0060714	100	963	44	1826
431	0.0074434	170	931	41	1692
432	0.0066161	56	867	36	1678
433	0.0065661	426	1118	54	1810
434	0.0057132	348	1107	41	1866
435	0.0069078	296	1049	45	1802
436	0.0057964	21	984	49	1947
437	0.0058321	116	967	49	1818
438	0.0073251	143	963	47	1783
439	0.0066198	502	1191	78	1880
440	0.0062327	234	1024	53	1814
441	0.0057166	179	946	61	1713
442	0.0048606	113	877	50	1641
443	0.0077432	211	1016	46	1821
444	0.005503	280	933	55	1586
445	0.0052101	258	910	61	1562
446	0.0065702	137	929	44	1721
447	0.0066832	20	877	32	1734
448	0.0060736	94	959	45	1824
449	0.0053162	253	919	38	1585
450	0.0061	91	865	43	1639
451	0.0058832	289	1040	52	1791
452	0.0061821	425	1060	64	1695
453	0.006004	244	1008	41	1772
454	0.0070611	33	893	62	1753
455	0.0067343	262	1042	57	1822
456	0.0063506	84	984	62	1884
457	0.0074601	41	900	52	1759
458	0.0054733	85	959	49	1833
459	0.0074634	279	1121	54	1963
460	0.005919	87	936	75	1785
461	0.0053187	48	870	40	1692
462	0.0062013	329	1046	47	1763
463	0.006071	54	847	41	1640
464	0.0059669	79	910	51	1741
465	0.0055875	170	1030	43	1890
466	0.0063361	145	889	52	1633
467	0.0059943	28	864	42	1700
468	0.0055489	156	1020	47	1884
469	0.0061586	236	1014	42	1792
470	0.0058051	102	824	40	1546
471	0.0073807	26	874	45	1722
472	0.0061695	316	1087	60	1858
473	0.0059259	12	922	46	1832
474	0.0061197	39	876	36	1713
475	0.006868	302	1012	44	1722
476	0.0051705	139	932	59	1725
477	0.0068144	133	916	58	1699
478	0.0065116	192	1027	53	1862
479	0.0069473	215	991	64	1767
480	0.0065087	113	986	40	1859
481	0.0069016	153	1025	44	1897
482	0.0075886	230	1047	49	1864
483	0.0066857	36	901	51	1766
484	0.0059403	74	945	43	1816
485	0.0050448	4	860	58	1716
486	0.0063441	319	1035	58	1751
487	0.0062919	108	975	60	1842
488	0.0061952	375	1098	72	1821
489	0.0068616	318	1090	48	1862
490	0.0059703	142	950	40	1758
491	0.0058911	22	867	57	1712
492	0.0070828	82	901	45	1720
493	0.0067008	79	927	38	1775
494	0.0066887	458	1017	39	1576
495	0.0056808	37	963	47	1889
496	0.0063493	128	1002	42	1876
497	0.0064532	313	1096	45	1879
498	0.0073666	239	983	43	1727
499	0.0054047	68	885	60	1702
500	0.0053418	98	873	35	1648
501	0.0067834	85	931	77	1777
502	0.0063324	114	949	45	1784
503	0.0062604	536	1163	62	1790
504	0.005754	19	809	45	1599
505	0.0064945	166	986	59	1806
506	0.0064878	242	999	52	1756
507	0.0063788	146	968	45	1790
508	0.006229	197	1011	73	1825
509	0.0068235	139	1015	40	1891
510	0.0055771	6	873	46	1740
511	0.0053627	230	974	45	1718
512	0.0060763	378	1082	46	1786
513	0.0071745	14	835	32	1656
514	0.0070595	106	913	64	1720
515	0.0057827	286	1115	55	1944
516	0.0064802	3	962	43	1921
517	0.0049554	182	999	57	1816
518	0.0065645	214	1010	41	1806
519	0.0074483	238	1064	52	1890
520	0.0056109	66	864	33	1662
521	0.007371	447	1138	63	1829
522	0.0066992	230	1000	48	1770
523	0.0058732	100	973	45	1846
524	0.0071188	273	1046	47	1819
525	0.0065855	119	986	55	1853
526	0.0067438	403	1064	71	1725
527	0.0060046	32	859	33	1686
528	0.0059346	104	889	41	1674
529	0.0062695	193	932	43	1671
530	0.007176	136	973	67	1810
531	0.0051323	223	973	72	1723
532	0.0067366	77	871	48	1665
533	0.0064146	282	962	46	1642
534	0.0064413	21	940	38	1859
535	0.005961	66	966	52	1866
536	0.0060803	99	913	55	1727
537	0.0060698	38	825	54	1612
538	0.0058502	422	1079	52	1736
539	0.0064725	141	987	49	1833
540	0.0062974	90	932	45	1774
541	0.0070076	206	1031	40	1856
542	0.0076381	158	907	37	1656
543	0.006553	179	981	47	1783
544	0.0061543	212	923	58	1634
545	0.0062999	10	899	55	1788
546	0.0052659	285	1022	41	1759
547	0.0067139	22	940	52	1858
548	0.0076928	493	1236	50	1979
549	0.0069377	117	937	40	1757
550	0.0054381	216	962	57	1708
551	0.0074444	285	1042	63	1799
552	0.0064501	207	940	49	1673
553	0.0058153	114	905	40	1696
554	0.0059756	24	960	58	1896
555	0.0068612	142	994	43	1846
556	0.0060239	44	834	41	1624
557	0.006198	22	823	52	1624
558	0.0067479	113	960	42	1807
559	0.006181	204	980	51	1756
560	0.0068178	139	906	57	1673
561	0.0069385	236	1048	48	1860
562	0.0068926	50	922	49	1794
563	0.0066182	16	874	44	1732
564	0.0063601	401	1108	61	1815
565	0.0069474	15	856	44	1697
566	0.0075138	159	976	49	1793
567	0.0068357	211	1025	47	1839
568	0.0068372	332	1065	31	1798
569	0.0060758	13	890	49	1767
570	0.0062138	61	980	47	1899
571	0.0066902	241	973	39	1705
572	0.0060762	124	949	58	1774
573	0.0068409	44	903	60	1762
574	0.0057494	9	794	52	1579
575	0.0056974	215	1000	43	1785
576	0.0057668	31	865	40	1699
577	0.0062788	100	853	43	1606
578	0.0061872	135	945	53	1755
579	0.006984	106	898	56	1690
580	0.006613	294	1024	46	1754
581	0.0062007	329	1011	45	1693
582	0.0055458	210	1030	57	1850
583	0.0056419	159	984	39	1809
584	0.0064151	28	879	53	1730
585	0.0060903	67	811	44	1555
586	0.0061261	165	962	39	1759
587	0.0074959	80	938	53	1796
588	0.0059674	296	1173	49	2050
589	0.0051518	85	930	56	1775
590	0.0072146	66	942	49	1818
591	0.0056294	170	996	51	1822
592	0.00651	32	895	44	1758
593	0.0065055	56	861	34	1666
594	0.0070042	138	1008	53	1878
595	0.0057722	192	946	35	1700
596	0.0070472	37	853	49	1669
597	0.007112	7	757	45	1507
598	0.0061497	161	1011	45	1861
599	0.0057809	250	938	65	1626
600	0.0058498	214	1027	42	1840
601	0.0068552	191	973	39	1755
602	0.0055538	77	916	58	1755
603	0.0065156	217	1010	69	1803
604	0.0068145	351	1002	44	1653
605	0.0063099	282	950	50	1618
606	0.0071403	260	940	55	1620
607	0.0065034	166	989	46	1812
608	0.006212	21	855	45	1689
609	0.0061535	246	1071	44	1896
610	0.0072805	88	966	62	1844
611	0.0076189	22	910	38	1798
612	0.0060962	395	1017	45	1639
613	0.0068885	325	1092	69	1859
614	0.0065108	63	891	44	1719
615	0.0056477	94	972	61	1850
616	0.0064956	355	1011	42	1667
617	0.0060687	69	907	39	1745
618	0.0068892	14	867	42	1720
619	0.0052766	2	863	46	1724
620	0.0063134	5	774	41	1543
621	0.0065811	272	968	41	1664
622	0.0065929	170	1055	46	1940
623	0.0059817	164	996	60	1828
624	0.0056888	332	1022	46	1712
625	0.006037	36	849	42	1662
626	0.0065998	304	996	53	1688
627	0.0058146	102	865	66	1628
628	0.006993	159	968	48	1777
629	0.0063036	176	1029	45	1882
630	0.0059358	48	865	64	1682
631	0.0052439	107	900	79	1693
632	0.0063858	38	977	45	1916
633	0.0060007	194	1025	47	1856
634	0.0072405	64	911	39	1758
635	0.005925	67	853	50	1639
636	0.0067768	207	935	39	1663
637	0.00642	129	915	53	1701
638	0.0051115	68	893	66	1718
639	0.0050903	129	883	39	1637
640	0.0069182	117	932	40	1747
641	0.0068302	1	950	57	1899
642	0.0063228	300	1027	55	1754
643	0.0063093	113	997	79	1881
644	0.0067775	211	955	63	1699
645	0.0052115	301	1051	43	1801
646	0.0062463	93	937	55	1781
647	0.0059787	167	1023	46	1879
648	0.0057667	237	1022	58	1807
649	0.0054637	38	894	52	1750
650	0.0053501	223	1030	48	1837
651	0.0070354	60	917	49	1774
652	0.0073508	141	910	37	1679
653	0.0054775	117	861	49	1605
654	0.0065169	277	1042	48	1807
655	0.006098	286	1048	57	1810
656	0.0071652	72	957	58	1842
657	0.0062411	1	807	84	1613
658	0.0056944	473	1108	50	1743
659	0.0048617	116	929	57	1742
660	0.0058268	136	926	76	1716
661	0.0059838	13	889	50	1765
662	0.0066893	1	839	40	1677
663	0.0059774	269	970	38	1671
664	0.0059525	49	871	59	1693
665	0.0053741	0	852	56	1704
666	0.0064253	57	941	49	1825
667	0.006563	161	913	75	1665
668	0.0085193	406	1075	46	1744
669	0.0056203	59	939	57	1819
670	0.0077772	458	1074	61	1690
671	0.0059118	295	998	46	1701
672	0.0063799	74	930	39	1786
673	0.0062743	24	879	44	1734
674	0.0058135	101	879	53	1657
675	0.0054483	207	923	58	1639
676	0.0069861	96	922	47	1748
677	0.0062333	71	940	46	1809
678	0.0065303	303	1059	40	1815
679	0.0063981	21	865	40	1709
680	0.0053771	250	1022	55	1794
681	0.0057326	179	1018	53	1857
682	0.0058296	101	893	55	1685
683	0.0055324	48	928	40	1808
684	0.0055005	169	914	42	1659
685	0.0058721	75	832	38	1589
686	0.0051279	119	949	84	1779
687	0.0063463	106	946	37	1786
688	0.005242	70	937	61	1804
689	0.0049272	467	1119	79	1771
690	0.0070487	102	931	66	1760
691	0.0056393	13	841	43	1669
692	0.0060208	137	894	47	1651
693	0.006196	55	896	42	1737
694	0.0060145	221	968	43	1715
695	0.0063473	36	837	45	1638
696	0.0070041	171	947	39	1723
697	0.0073281	258	1004	45	1750
698	0.0060335	297	1090	40	1883
699	0.0060128	141	988	48	1835
700	0.0063749	16	911	77	1806
701	0.0060475	165	914	46	1663
702	0.0070551	323	1044	47	1765
703	0.0066449	281	1063	66	1845
704	0.0064772	11	860	43	1709
705	0.0056177	39	998	45	1957
706	0.0063601	21	929	48	1837
707	0.0067483	70	861	53	1652
708	0.0059256	452	1119	53	1786
709	0.0056817	167	944	58	1721
710	0.0062255	59	899	39	1739
711	0.0073179	5	910	49	1815
712	0.0066122	217	998	45	1779
713	0.0069454	319	1042	79	1765
714	0.0059605	50	1004	48	1958
715	0.0055833	105	915	39	1725
716	0.0073678	66	897	41	1728
717	0.0067196	168	989	51	1810
718	0.0061172	58	822	49	1586
719	0.0068105	218	1041	49	1864
720	0.0072406	110	911	45	1712
721	0.0069634	202	1004	41	1806
722	0.0065741	112	969	53	1826
723	0.0059586	45	906	44	1767
724	0.0072457	52	921	39	1790
725	0.0066625	261	1004	51	1747
726	0.0062155	142	942	48	1742
727	0.006561	130	893	48	1656
728	0.0064574	349	1043	55	1737
729	0.0067122	329	1063	47	1797
730	0.0060814	23	924	50	1825
731	0.0070581	567	1222	93	1877
732	0.0067868	38	853	39	1668
733	0.0069308	30	967	38	1904
734	0.0060888	88	900	46	1712
735	0.0056107	177	1006	45	1835
736	0.0068982	1	969	45	1937
737	0.0065463	126	917	44	1708
738	0.0064176	4	816	36	1628
739	0.0069948	8	975	49	1942
740	0.0065145	280	1132	75	1984
741	0.0059599	107	979	53	1851
742	0.0065359	37	850	43	1663
743	0.0063343	53	950	42	1847
744	0.0072518	256	992	43	1728
745	0.0076121	32	891	45	1750
746	0.0062724	246	945	42	1644
747	0.0049703	161	919	59	1677
748	0.0060865	142	972	43	1802
749	0.0062039	108	919	56	1730
750	0.0058841	21	897	44	1773
751	0.006907	204	1076	53	1948
752	0.0065778	42	885	42	1728
753	0.0066393	28	901	52	1774
754	0.005998	187	1020	42	1853
755	0.0069487	247	1026	49	1805
756	0.0057527	326	1078	56	1830
757	0.0057662	435	1138	50	1841
758	0.0068547	79	863	43	1647
759	0.0072603	408	1056	41	1704
760	0.0061904	405	1039	50	1673
761	0.0055033	301	1016	64	1731
762	0.0066538	140	985	52	1830
763	0.0065672	286	1062	52	1838
764	0.0048402	127	990	53	1853
765	0.0061174	313	1003	45	1693
766	0.0072374	162	919	39	1676
767	0.0065357	117	976	58	1835
768	0.0068964	56	952	56	1848
769	0.0062655	12	929	58	1846
770	0.0067544	11	845	54	1679
771	0.0060931	33	830	36	1627
772	0.0069841	47	870	42	1693
773	0.0056581	246	959	40	1672
774	0.0062345	115	858	57	1601
775	0.0067036	17	925	47	1833
776	0.0064431	18	946	54	1874
777	0.0060739	62	926	43	1790
778	0.0064685	313	1019	60	1725
779	0.0059548	245	1013	47	1781
780	0.0081061	253	1014	45	1775
781	0.0068063	1	859	38	1717
782	0.0062465	128	897	36	1666
783	0.0066221	246	982	38	1718
784	0.006644	7	848	38	1689
785	0.0071704	273	1067	78	1861
786	0.0072848	276	997	48	1718
787	0.0078872	287	1029	38	1771
788	0.0065889	57	910	51	1763
789	0.0070435	249	1066	57	1883
790	0.0059617	176	927	46	1678
791	0.0053164	368	1110	54	1852
792	0.0063011	6	832	41	1658
793	0.0065111	3	837	57	1671
794	0.0061924	341	1012	55	1683
795	0.0057116	70	926	54	1782
796	0.0064056	406	1058	59	1710
797	0.0060278	42	849	49	1656
798	0.0056065	55	877	60	1699
799	0.0066606	83	874	49	1665
800	0.0064568	357	1071	54	1785
801	0.0055046	30	901	70	1772
802	0.0061744	102	884	46	1666
803	0.0058667	211	944	52	1677
804	0.0058452	309	986	45	1663
805	0.0062143	102	899	41	1696
806	0.0073377	58	978	45	1898
807	0.0057694	359	1113	62	1867
808	0.0059639	63	899	39	1735
809	0.0058621	10	886	57	1762
810	0.0059622	14	928	65	1842
811	0.0072789	3	960	44	1917
812	0.0075757	296	991	46	1686
813	0.0059946	22	865	42	1708
814	0.0054883	178	946	46	1714
815	0.0063863	65	960	53	1855
816	0.0062875	177	918	42	1659
817	0.0058444	29	806	43	1583
818	0.0070585	248	1011	54	1774
819	0.0057581	66	849	43	1632
820	0.0056294	165	915	37	1665
821	0.0072299	192	1009	49	1826
822	0.0058823	50	862	42	1674
823	0.0070935	67	914	55	1761
824	0.0059959	232	1003	42	1774
825	0.0057836	198	911	60	1624
826	0.0061755	12	856	33	1700
827	0.0066493	126	912	51	1698
828	0.0058763	239	983	54	1727
829	0.0065287	104	928	56	1752
830	0.007467	73	985	47	1897
831	0.0067332	119	956	54	1793
832	0.0048616	141	970	52	1799
833	0.0068253	125	979	46	1833
834	0.0060907	1	887	64	1773
835	0.0077137	325	1047	50	1769
836	0.0055481	140	898	50	1656
837	0.006693	165	1046	43	1927
838	0.0062177	79	960	47	1841
839	0.006316	151	976	51	1801
840	0.0071196	158	964	48	1770
841	0.0055349	232	966	51	1700
842	0.0058015	152	1004	57	1856
843	0.007111	52	857	41	1662
844	0.0075685	318	1090	44	1862
845	0.0064778	85	882	35	1679
846	0.006673	95	954	42	1813
847	0.0070836	44	970	43	1896
848	0.0064562	77	906	83	1735
849	0.0070114	243	1006	41	1769
850	0.0069243	340	1050	56	1760
851	0.005681	146	857	54	1568
852	0.0069339	102	936	41	1770
853	0.0068349	101	846	36	1591
854	0.0058157	113	920	44	1727
855	0.0067033	81	880	47	1679
856	0.0051592	170	954	36	1738
857	0.0070551	195	952	37	1709
858	0.0059834	358	1022	70	1686
859	0.0067477	1	852	63	1703
860	0.0051816	59	898	49	1737
861	0.0068246	155	952	41	1749
862	0.0064966	269	944	48	1619
863	0.0058067	21	831	44	1641
864	0.0072114	171	976	94	1781
865	0.0064348	175	971	42	1767
866	0.0063327	64	957	42	1850
867	0.0059663	124	979	42	1834
868	0.0079483	107	974	50	1841
869	0.0050865	244	983	67	1722
870	0.006378	611	1181	56	1751
871	0.0061868	341	1044	43	1747
872	0.0061507	8	889	37	1770
873	0.0054706	189	1064	64	1939
874	0.0070641	173	1039	47	1905
875	0.0059974	76	899	52	1722
876	0.0060994	102	927	37	1752
877	0.0057063	15	890	38	1765
878	0.0067257	213	1025	51	1837
879	0.0060469	187	955	72	1723
880	0.0058984	37	921	47	1805
881	0.0059655	58	850	37	1642
882	0.0073517	318	1103	55	1888
883	0.0059632	108	998	44	1888
884	0.0059623	171	969	48	1767
885	0.0061514	67	964	55	1861
886	0.0067176	64	894	60	1724
887	0.0065137	206	871	50	1536
888	0.0065072	35	912	60	1789
889	0.0063425	129	927	56	1725
890	0.0054592	260	1031	53	1802
891	0.006314	282	1041	51	1800
892	0.0068764	343	1043	39	1743
893	0.0063447	17	868	48	1719
894	0.0060591	568	1140	44	1712
895	0.0067555	105	985	54	1865
896	0.0055201	380	994	44	1608
897	0.0065962	144	989	40	1834
898	0.0067833	399	1090	63	1781
899	0.0065183	103	987	55	1871
900	0.0054228	414	1113	59	1812
901	0.0062226	220	973	36	1726
902	0.0068954	376	1024	41	1672
903	0.0048416	23	800	43	1577
904	0.0045344	130	893	57	1656
905	0.0063156	14	848	62	1682
906	0.0061455	179	963	51	1747
907	0.0066252	261	1039	50	1817
908	0.0072674	114	949	38	1784
909	0.0069276	247	1019	45	1791
910	0.00651	165	868	33	1571
911	0.0056303	28	836	50	1644
912	0.0058479	7	871	41	1735
913	0.0067626	67	932	97	1797
914	0.006391	110	929	43	1748
915	0.0059047	471	1058	86	1645
916	0.0060502	51	952	58	1853
917	0.005792	5	902	40	1799
918	0.0061325	47	874	48	1701
919	0.0057133	210	935	50	1660
920	0.0055221	138	915	58	1692
921	0.0057243	18	850	48	1682
922	0.0073799	225	1051	59	1877
923	0.0069915	116	990	57	1864
924	0.0070683	421	1178	65	1935
925	0.0059048	243	1014	59	1785
926	0.0059173	151	934	51	1717
927	0.0056777	47	830	37	1613
928	0.0063955	384	1045	46	1706
929	0.0055413	19	851	54	1683
930	0.0064633	152	1019	47	1886
931	0.0069649	23	908	58	1793
932	0.0066671	150	969	54	1788
933	0.006954	528	1184	48	1840
934	0.0058105	106	919	44	1732
935	0.0068397	104	915	43	1726
936	0.0065972	209	963	48	1717
937	0.007428	128	951	53	1774
938	0.0060521	115	959	53	1803
939	0.0059429	245	1020	60	1795
940	0.0064214	15	887	45	1759
941	0.0057533	192	932	49	1672
942	0.0058099	105	993	43	1881
943	0.006005	36	865	40	1694
944	0.0064193	64	877	50	1690
945	0.0060197	136	989	56	1842
946	0.0059177	114	919	69	1724
947	0.0062058	139	976	60	1813
948	0.0058268	8	931	46	1854
949	0.0051684	52	856	44	1660
950	0.0069117	42	978	65	1914
951	0.0070771	425	1168	53	1911
952	0.0068563	25	880	42	1735
953	0.00773	29	837	39	1645
954	0.0068099	209	1033	50	1857
955	0.0064795	494	1160	45	1826
956	0.005462	91	920	73	1749
957	0.0045352	205	935	43	1665
958	0.0052413	180	954	37	1728
959	0.0064488	120	965	39	1810
960	0.0056576	94	923	42	1752
961	0.0056577	46	870	52	1694
962	0.0064974	304	1094	59	1884
963	0.0080273	8	933	48	1858
964	0.0051652	194	981	84	1768
965	0.0064965	184	958	57	1732
966	0.0062997	125	954	63	1783
967	0.0063	360	1134	40	1908
968	0.006573	305	1035	46	1765
969	0.0070543	31	900	48	1769
970	0.0063811	10	838	62	1666
971	0.0055809	23	932	48	1841
972	0.0062766	98	895	42	1692
973	0.0058993	62	814	40	1566
974	0.0061681	15	888	59	1761
975	0.006877	25	906	43	1787
976	0.0064114	107	897	57	1687
977	0.0066321	276	1058	60	1840
978	0.0057967	59	933	42	1807
979	0.0059552	245	1026	42	1807
980	0.0073036	171	985	54	1799
981	0.0055751	80	900	52	1720
982	0.0059163	346	1096	58	1846
983	0.0072758	173	978	49	1783
984	0.0071019	253	1037	46	1821
985	0.0071575	73	974	37	1875
986	0.0059968	335	1074	61	1813
987	0.0065556	440	1095	45	1750
988	0.006202	124	951	46	1778
989	0.0069617	8	849	53	1690
990	0.0057638	230	938	33	1646
991	0.0070753	50	918	40	1786
992	0.0062499	107	904	38	1701
993	0.0072151	49	906	56	1763
994	0.0053833	111	945	51	1779
995	0.0056995	133	921	35	1709
996	0.0069531	118	915	35	1712
997	0.0054726	57	904	46	1751
998	0.0064404	44	829	33	1614
999	0.0063836	67	859	57	1651
mean	0.00633974	153.349	953.374	49.553	1753.4

## Sheet: PolyMin_Bal
	time	SEq	Bal	Reg	Egal
0	0.0059202	231	919	48	1607
1	0.0067937	162	930	60	1698
2	0.0060337	15	902	41	1789
3	0.0064227	257	970	55	1683
4	0.0066417	86	940	59	1794
5	0.0058978	394	1034	47	1674
6	0.006594	106	909	61	1712
7	0.0063463	20	884	46	1748
8	0.0061529	65	891	51	1717
9	0.0060875	21	841	35	1661
10	0.0069209	273	984	47	1695
11	0.0065767	86	921	50	1756
12	0.0059101	56	825	45	1594
13	0.0056445	24	870	50	1716
14	0.0054014	40	863	46	1686
15	0.006802	361	1149	66	1937
16	0.0060013	28	907	54	1786
17	0.0067358	253	979	69	1705
18	0.0072532	145	1002	52	1859
19	0.0065446	755	1254	90	1753
20	0.005384	406	1033	45	1660
21	0.0069467	67	947	49	1827
22	0.0062284	103	935	50	1767
23	0.0064069	193	1014	42	1835
24	0.006399	245	1010	40	1775
25	0.0066741	52	865	56	1678
26	0.0070611	221	949	61	1677
27	0.0067076	36	904	50	1772
28	0.0066756	56	887	48	1718
29	0.006095	52	935	42	1818
30	0.0057968	273	974	50	1675
31	0.0053242	213	934	43	1655
32	0.0059519	85	910	39	1735
33	0.0065829	399	1093	63	1787
34	0.0054982	9	824	55	1639
35	0.0056357	177	938	44	1699
36	0.0061964	135	926	61	1717
37	0.0057554	67	904	44	1741
38	0.0055951	225	964	61	1703
39	0.0061576	114	969	41	1824
40	0.0058171	264	998	64	1732
41	0.0063274	81	836	53	1591
42	0.0066515	72	891	43	1710
43	0.0068611	20	979	54	1938
44	0.0062306	16	900	37	1784
45	0.0062469	173	941	37	1709
46	0.0059275	206	938	50	1670
47	0.0067599	41	998	50	1955
48	0.0066037	74	838	33	1602
49	0.0055544	33	807	70	1581
50	0.006138	235	918	39	1601
51	0.0069928	149	992	58	1835
52	0.0058963	218	933	61	1648
53	0.0061727	41	832	40	1623
54	0.0059836	106	900	57	1694
55	0.0070542	176	947	48	1718
56	0.006923	267	965	49	1663
57	0.0072814	182	1022	61	1862
58	0.0074422	221	1010	46	1799
59	0.0060771	231	970	46	1709
60	0.0053241	187	986	44	1785
61	0.0055964	104	903	35	1702
62	0.0063829	85	961	47	1837
63	0.0051809	40	863	66	1686
64	0.0059227	106	934	53	1762
65	0.0048303	283	986	47	1689
66	0.0066552	47	853	44	1659
67	0.0068235	339	1026	70	1713
68	0.0057903	419	1058	52	1697
69	0.0070193	85	981	48	1877
70	0.0070652	257	1044	50	1831
71	0.0066484	155	911	47	1667
72	0.0065758	87	901	42	1715
73	0.0065493	11	919	41	1827
74	0.0069155	482	1103	41	1724
75	0.0062645	15	866	43	1717
76	0.0068601	594	1218	38	1842
77	0.00653	247	1042	56	1837
78	0.0072191	3	942	48	1881
79	0.0068973	18	862	51	1706
80	0.0070019	26	926	45	1826
81	0.0074561	84	952	49	1820
82	0.0069354	129	975	39	1821
83	0.0056163	639	1192	67	1745
84	0.0051036	44	883	43	1722
85	0.0069472	294	1033	74	1772
86	0.0078927	152	954	38	1756
87	0.0068522	37	845	38	1653
88	0.0058318	153	962	51	1771
89	0.0055406	157	945	64	1733
90	0.0064623	11	893	40	1775
91	0.0068225	128	1003	50	1878
92	0.0049527	84	944	51	1804
93	0.0057378	77	848	45	1619
94	0.0068803	8	852	50	1696
95	0.0068429	210	966	53	1722
96	0.0069123	117	887	62	1657
97	0.0062741	12	812	42	1612
98	0.006524	41	968	58	1895
99	0.0056818	35	870	49	1705
100	0.0062033	313	1004	41	1695
101	0.0054921	39	844	43	1649
102	0.0066425	184	972	66	1760
103	0.005524	353	1143	55	1933
104	0.0067169	209	1000	45	1791
105	0.0065556	311	1008	53	1705
106	0.0055042	130	905	53	1680
107	0.0061799	301	1030	45	1759
108	0.0070098	150	965	40	1780
109	0.0066468	68	911	64	1754
110	0.0057655	333	1033	53	1733
111	0.005245	62	892	56	1722
112	0.0065301	363	1055	52	1747
113	0.0050235	4	795	44	1586
114	0.0056966	325	1039	52	1753
115	0.0071184	256	1017	40	1778
116	0.0060492	98	971	60	1844
117	0.0063784	49	823	36	1597
118	0.0059036	253	966	40	1679
119	0.0073338	29	871	54	1713
120	0.0071143	255	985	49	1715
121	0.0065478	511	1127	42	1743
122	0.0060937	66	856	42	1646
123	0.0064493	144	859	40	1574
124	0.0068164	156	948	59	1740
125	0.0055556	170	1009	39	1848
126	0.0070416	192	1009	42	1826
127	0.006455	25	836	33	1647
128	0.0050167	18	878	63	1738
129	0.0067585	69	945	40	1821
130	0.0069001	217	979	50	1741
131	0.0051147	192	930	34	1668
132	0.0070449	362	1027	49	1692
133	0.0054479	68	920	65	1772
134	0.0064914	64	896	44	1728
135	0.0056535	435	1121	76	1807
136	0.0064723	136	926	42	1716
137	0.0063795	83	922	43	1761
138	0.0056704	74	940	51	1806
139	0.0057768	3	899	45	1795
140	0.0068176	30	908	41	1786
141	0.0053599	83	863	53	1643
142	0.0056524	341	1095	45	1849
143	0.0059244	105	928	47	1751
144	0.0058801	297	1030	39	1763
145	0.0064644	89	955	46	1821
146	0.0054527	83	895	58	1707
147	0.0065476	504	1202	79	1900
148	0.0060689	241	1006	52	1771
149	0.0073069	77	996	38	1915
150	0.0075569	152	937	64	1722
151	0.0069151	15	923	35	1831
152	0.0061113	111	950	50	1789
153	0.0059644	120	817	43	1514
154	0.0065445	12	853	67	1694
155	0.0065004	323	1022	45	1721
156	0.0061009	51	865	53	1679
157	0.0062286	13	829	60	1645
158	0.0060743	19	747	41	1475
159	0.0069445	100	937	55	1774
160	0.0063277	24	869	47	1714
161	0.0055922	78	799	31	1520
162	0.0057702	192	1017	44	1842
163	0.0065527	254	977	47	1700
164	0.0059548	451	1099	40	1747
165	0.00584	26	824	41	1622
166	0.0057912	37	833	37	1629
167	0.006146	189	1002	45	1815
168	0.0066191	148	925	60	1702
169	0.0064721	322	1073	44	1824
170	0.0063401	6	914	64	1822
171	0.0066411	355	1094	56	1833
172	0.0061508	180	934	38	1688
173	0.0058121	59	883	42	1707
174	0.0061547	335	1150	48	1965
175	0.0057463	118	881	52	1644
176	0.0065002	263	961	38	1659
177	0.0057248	299	1058	44	1817
178	0.006981	58	917	51	1776
179	0.0054321	7	826	45	1645
180	0.0063927	39	990	45	1941
181	0.0070905	260	1023	35	1786
182	0.0053249	59	796	35	1533
183	0.0070099	130	1007	57	1884
184	0.0055594	289	964	49	1639
185	0.0065551	109	943	52	1777
186	0.0065829	88	886	39	1684
187	0.0074038	36	1005	47	1974
188	0.0061936	17	851	50	1685
189	0.0070083	376	1094	50	1812
190	0.0052973	50	900	41	1750
191	0.0050037	44	837	57	1630
192	0.0061515	59	920	51	1781
193	0.0054619	25	922	41	1819
194	0.0055089	129	890	48	1651
195	0.0059853	190	960	42	1730
196	0.0058721	14	895	40	1776
197	0.0064733	3	830	42	1657
198	0.0056081	118	927	48	1736
199	0.006502	290	961	44	1632
200	0.0061147	150	960	39	1770
201	0.0059059	49	854	40	1659
202	0.0060277	162	936	39	1710
203	0.0063474	31	881	51	1731
204	0.0067967	169	1013	50	1857
205	0.0056427	160	921	56	1682
206	0.0064701	237	1037	45	1837
207	0.0064026	24	883	46	1742
208	0.0065142	31	867	44	1703
209	0.0061177	260	975	40	1690
210	0.0074581	53	938	41	1823
211	0.0070986	162	971	48	1780
212	0.006313	170	1005	60	1840
213	0.0067179	10	817	44	1624
214	0.0061136	1	878	49	1755
215	0.0062448	213	923	47	1633
216	0.0060527	437	1102	48	1767
217	0.0055808	201	934	52	1667
218	0.0058881	314	1059	52	1804
219	0.0066725	329	1112	67	1895
220	0.0070608	50	873	40	1696
221	0.0061709	57	870	48	1683
222	0.0065563	61	920	56	1779
223	0.0069093	496	1178	47	1860
224	0.0063609	340	1060	53	1780
225	0.0071564	20	837	52	1654
226	0.0059044	140	919	51	1698
227	0.005933	244	1020	72	1796
228	0.0066493	368	1067	53	1766
229	0.0058197	22	853	57	1684
230	0.0065045	245	1001	44	1757
231	0.006897	53	937	40	1821
232	0.0075922	369	1081	52	1793
233	0.0065193	397	1074	60	1751
234	0.007198	5	911	52	1817
235	0.0073356	139	978	85	1817
236	0.0066372	249	1021	58	1793
237	0.0071772	160	909	44	1658
238	0.0073591	34	887	37	1740
239	0.0060113	294	1059	53	1824
240	0.0054684	41	851	47	1661
241	0.0057776	75	939	44	1803
242	0.007333	84	866	58	1648
243	0.0067637	127	997	60	1867
244	0.0059428	230	1001	46	1772
245	0.0061867	192	962	40	1732
246	0.0068905	73	942	64	1811
247	0.0069877	107	979	43	1851
248	0.0054652	172	919	40	1666
249	0.0064576	354	1031	66	1708
250	0.0067128	238	993	43	1748
251	0.006957	84	905	66	1726
252	0.0060138	153	988	51	1823
253	0.0064137	141	877	54	1613
254	0.0064955	132	880	40	1628
255	0.0065839	256	1004	40	1752
256	0.0063271	287	922	59	1557
257	0.0061439	199	955	55	1711
258	0.0062404	282	1051	52	1820
259	0.0064593	62	930	62	1798
260	0.0068554	332	1038	65	1744
261	0.0064858	225	982	46	1739
262	0.0071381	14	899	48	1784
263	0.0048537	58	888	57	1718
264	0.005918	13	908	51	1803
265	0.0066406	11	935	37	1859
266	0.006405	77	894	55	1711
267	0.0070557	127	971	60	1815
268	0.0054788	84	917	58	1750
269	0.0064018	32	873	54	1714
270	0.0066685	80	925	38	1770
271	0.0070833	24	853	42	1682
272	0.0066204	44	834	47	1624
273	0.0070303	176	956	81	1736
274	0.0057834	417	1014	60	1611
275	0.0062584	95	854	39	1613
276	0.005789	112	925	44	1738
277	0.0062304	46	831	54	1616
278	0.0057695	83	869	34	1655
279	0.006431	295	939	65	1583
280	0.0070057	30	926	54	1822
281	0.0057368	148	930	33	1712
282	0.0076469	25	914	49	1803
283	0.0062819	39	886	50	1733
284	0.0067181	87	906	46	1725
285	0.006453	16	855	45	1694
286	0.0057911	163	1060	62	1957
287	0.0061755	137	979	51	1821
288	0.006055	151	879	44	1607
289	0.0059755	26	819	37	1612
290	0.0070666	173	933	40	1693
291	0.0053975	116	929	45	1742
292	0.0057441	88	968	43	1848
293	0.0062768	32	839	36	1646
294	0.0065933	151	1019	46	1887
295	0.0066449	66	876	52	1686
296	0.0062001	1	807	46	1613
297	0.0072203	174	972	52	1770
298	0.0073412	117	910	50	1703
299	0.0073346	151	995	77	1839
300	0.0067979	225	1033	55	1841
301	0.0067748	261	991	41	1721
302	0.0068316	7	938	43	1869
303	0.0059163	4	858	48	1712
304	0.0056746	42	840	45	1638
305	0.0072585	150	999	54	1848
306	0.0050243	37	918	52	1799
307	0.0067851	13	873	62	1733
308	0.005337	83	906	47	1729
309	0.0068494	450	1156	52	1862
310	0.0073545	128	952	44	1776
311	0.0066388	52	931	42	1810
312	0.0068629	120	904	43	1688
313	0.0065952	13	877	51	1741
314	0.0073965	16	938	52	1860
315	0.0066426	47	889	44	1731
316	0.0062258	100	963	50	1826
317	0.0066822	301	999	54	1697
318	0.0062439	195	945	48	1695
319	0.0062451	50	879	57	1708
320	0.0060902	244	947	56	1650
321	0.006644	16	861	52	1706
322	0.0062627	80	939	44	1798
323	0.0067973	25	922	46	1819
324	0.0062664	59	959	39	1859
325	0.0059527	174	960	45	1746
326	0.0066657	62	868	49	1674
327	0.0064878	113	899	52	1685
328	0.0059915	64	889	54	1714
329	0.0055897	92	913	56	1734
330	0.0066597	160	924	47	1688
331	0.0060121	208	958	52	1708
332	0.0063974	120	930	56	1740
333	0.0060207	487	1145	54	1803
334	0.0066044	230	1006	37	1782
335	0.0065756	368	1043	37	1718
336	0.0066449	151	960	55	1769
337	0.0068265	133	987	45	1841
338	0.0068373	35	885	51	1735
339	0.0054869	133	921	58	1709
340	0.0057546	54	855	40	1656
341	0.0085325	122	954	38	1786
342	0.0069713	63	907	52	1751
343	0.0050361	116	924	53	1732
344	0.006167	375	1119	64	1863
345	0.0068884	20	896	34	1772
346	0.0068652	31	881	42	1731
347	0.0068976	279	1031	78	1783
348	0.0067306	382	1095	41	1808
349	0.0073825	58	906	38	1754
350	0.0061197	17	838	45	1659
351	0.0065691	327	1062	40	1797
352	0.0065487	376	1065	58	1754
353	0.0067876	113	907	46	1701
354	0.0069968	137	926	48	1715
355	0.0063811	213	906	54	1599
356	0.0059444	133	927	45	1721
357	0.0066995	42	859	46	1676
358	0.0059754	89	865	48	1641
359	0.0071662	149	1068	55	1987
360	0.006618	92	1013	50	1934
361	0.0066416	421	1129	53	1837
362	0.0074551	447	1173	45	1899
363	0.0062779	5	856	53	1707
364	0.0055307	196	964	53	1732
365	0.0067326	78	851	42	1624
366	0.00621	25	848	60	1671
367	0.0065321	229	1012	60	1795
368	0.0071926	222	957	50	1692
369	0.0066908	362	1069	43	1776
370	0.0070797	69	907	42	1745
371	0.005857	37	898	54	1759
372	0.0065662	323	1097	73	1871
373	0.0051694	45	882	37	1719
374	0.0080046	31	946	38	1861
375	0.005633	391	999	37	1607
376	0.0060113	102	850	55	1598
377	0.0060407	103	897	41	1691
378	0.0070794	40	970	45	1900
379	0.0059473	67	935	58	1803
380	0.0060907	46	904	53	1762
381	0.0053182	107	987	69	1867
382	0.0064861	61	890	46	1719
383	0.0058981	239	965	40	1691
384	0.0062239	126	1020	53	1914
385	0.0063115	182	1073	61	1964
386	0.0052459	23	894	55	1765
387	0.0067932	232	930	62	1628
388	0.0075835	230	1023	61	1816
389	0.0068077	22	847	41	1672
390	0.0061136	157	980	61	1803
391	0.0069902	76	896	48	1716
392	0.0066583	35	948	57	1861
393	0.0061861	29	875	43	1721
394	0.0058532	91	926	48	1761
395	0.0064945	82	918	46	1754
396	0.0067722	32	903	42	1774
397	0.0052296	476	1141	52	1806
398	0.006501	28	957	45	1886
399	0.0068021	528	1154	51	1780
400	0.0063052	117	943	57	1769
401	0.0057522	209	962	39	1715
402	0.0063609	50	926	48	1802
403	0.0071872	68	919	42	1770
404	0.0067658	366	1141	53	1916
405	0.0063071	251	929	47	1607
406	0.0078226	93	922	49	1751
407	0.0057889	260	997	47	1734
408	0.0069638	151	1010	52	1869
409	0.0071838	471	1174	43	1877
410	0.0062457	306	980	54	1654
411	0.0065305	145	908	41	1671
412	0.0054258	169	983	36	1797
413	0.0061143	407	1117	56	1827
414	0.0064208	189	958	35	1727
415	0.005956	155	875	46	1595
416	0.0060624	38	875	36	1712
417	0.0065908	104	948	46	1792
418	0.0054011	20	874	52	1728
419	0.0052829	52	823	32	1594
420	0.0057827	236	1009	46	1782
421	0.0052965	45	921	53	1797
422	0.0057202	257	1010	55	1763
423	0.0070218	176	1024	70	1872
424	0.0061784	11	868	39	1725
425	0.0063504	73	931	61	1789
426	0.0058941	347	1037	89	1727
427	0.0067937	372	1150	48	1928
428	0.0052551	441	1101	34	1761
429	0.0058037	51	898	50	1745
430	0.0061306	100	963	44	1826
431	0.0072066	170	931	41	1692
432	0.0068665	56	867	36	1678
433	0.0072223	426	1118	54	1810
434	0.0057176	348	1107	41	1866
435	0.0065131	296	1049	45	1802
436	0.0057916	21	984	49	1947
437	0.0057885	116	967	49	1818
438	0.007409	143	963	47	1783
439	0.006563	502	1191	78	1880
440	0.0062945	234	1024	53	1814
441	0.0057279	179	946	61	1713
442	0.0046178	113	877	50	1641
443	0.0076601	211	1016	46	1821
444	0.0056606	280	933	55	1586
445	0.0051203	258	910	61	1562
446	0.0064812	137	929	44	1721
447	0.0065409	20	877	32	1734
448	0.0058922	94	959	45	1824
449	0.0051808	253	919	38	1585
450	0.0061919	91	865	43	1639
451	0.0058509	289	1040	52	1791
452	0.0063685	425	1060	64	1695
453	0.0059808	244	1008	41	1772
454	0.0065132	33	893	62	1753
455	0.0066411	262	1042	57	1822
456	0.0066294	213	979	63	1745
457	0.0073898	41	900	52	1759
458	0.0055686	85	959	49	1833
459	0.0073908	279	1121	54	1963
460	0.005973	87	936	75	1785
461	0.0054438	48	870	40	1692
462	0.0062868	400	1032	47	1664
463	0.0061	54	847	41	1640
464	0.005725	79	910	51	1741
465	0.0064341	170	1030	43	1890
466	0.0064054	145	889	52	1633
467	0.0062141	28	864	42	1700
468	0.0054037	156	1020	47	1884
469	0.0062372	236	1014	42	1792
470	0.0058166	102	824	40	1546
471	0.0074498	26	874	45	1722
472	0.0062028	316	1087	60	1858
473	0.0061495	12	922	46	1832
474	0.0060511	39	876	36	1713
475	0.0069505	302	1012	44	1722
476	0.0052285	139	932	59	1725
477	0.0068097	133	916	58	1699
478	0.0065364	192	1027	53	1862
479	0.0067632	215	991	64	1767
480	0.0065826	113	986	40	1859
481	0.006763	153	1025	44	1897
482	0.0078277	230	1047	49	1864
483	0.0068205	36	901	51	1766
484	0.0057241	74	945	43	1816
485	0.0050346	4	860	58	1716
486	0.0065081	319	1035	58	1751
487	0.0059428	108	975	60	1842
488	0.0062802	375	1098	72	1821
489	0.006846	318	1090	48	1862
490	0.0061205	142	950	40	1758
491	0.0060074	22	867	57	1712
492	0.0068909	82	901	45	1720
493	0.006673	79	927	38	1775
494	0.0061059	458	1017	39	1576
495	0.0059167	37	963	47	1889
496	0.0064973	128	1002	42	1876
497	0.0065897	313	1096	45	1879
498	0.0074551	239	983	43	1727
499	0.0064111	68	885	60	1702
500	0.0052781	98	873	35	1648
501	0.0064429	85	931	77	1777
502	0.0065187	114	949	45	1784
503	0.0062557	536	1163	62	1790
504	0.0056939	19	809	45	1599
505	0.0062404	166	986	59	1806
506	0.0067026	242	999	52	1756
507	0.006293	146	968	45	1790
508	0.0063331	197	1011	73	1825
509	0.0066296	139	1015	40	1891
510	0.0058772	6	873	46	1740
511	0.0056173	230	974	45	1718
512	0.0063509	378	1082	46	1786
513	0.0073754	14	835	32	1656
514	0.006754	106	913	64	1720
515	0.0058457	286	1115	55	1944
516	0.0069884	3	962	43	1921
517	0.0050735	182	999	57	1816
518	0.0064684	214	1010	41	1806
519	0.0072648	238	1064	52	1890
520	0.0062447	66	864	33	1662
521	0.0073128	447	1138	63	1829
522	0.0073351	230	1000	48	1770
523	0.0060493	100	973	45	1846
524	0.0071707	273	1046	47	1819
525	0.0065143	119	986	55	1853
526	0.0068196	403	1064	71	1725
527	0.00598	32	859	33	1686
528	0.0057554	104	889	41	1674
529	0.0063011	193	932	43	1671
530	0.0070797	136	973	67	1810
531	0.0053844	223	973	72	1723
532	0.0065282	77	871	48	1665
533	0.0066386	282	962	46	1642
534	0.0064736	21	940	38	1859
535	0.0058191	66	966	52	1866
536	0.0061793	99	913	55	1727
537	0.005984	38	825	54	1612
538	0.0056551	422	1079	52	1736
539	0.0066482	141	987	49	1833
540	0.0063329	90	932	45	1774
541	0.0070389	206	1031	40	1856
542	0.0075181	158	907	37	1656
543	0.0067671	179	981	47	1783
544	0.0061392	212	923	58	1634
545	0.0065533	10	899	55	1788
546	0.0053433	285	1022	41	1759
547	0.0067543	22	940	52	1858
548	0.0074265	493	1236	50	1979
549	0.007184	117	937	40	1757
550	0.005609	216	962	57	1708
551	0.0073664	285	1042	63	1799
552	0.0066788	207	940	49	1673
553	0.0057833	114	905	40	1696
554	0.0060724	24	960	58	1896
555	0.0070329	142	994	43	1846
556	0.0060282	44	834	41	1624
557	0.0065589	22	823	52	1624
558	0.006045	113	960	42	1807
559	0.0062105	204	980	51	1756
560	0.0067379	139	906	57	1673
561	0.0069367	236	1048	48	1860
562	0.0068378	50	922	49	1794
563	0.0069383	16	874	44	1732
564	0.006373	401	1108	61	1815
565	0.0066518	15	856	44	1697
566	0.006431	159	976	49	1793
567	0.0068583	211	1025	47	1839
568	0.0066939	332	1065	31	1798
569	0.0061772	13	890	49	1767
570	0.0062144	80	979	47	1878
571	0.0064258	241	973	39	1705
572	0.0061165	124	949	58	1774
573	0.0067669	44	903	60	1762
574	0.0058681	9	794	52	1579
575	0.0057655	224	982	43	1740
576	0.0057682	31	865	40	1699
577	0.0062825	100	853	43	1606
578	0.0062652	135	945	53	1755
579	0.0071686	106	898	56	1690
580	0.006841	294	1024	46	1754
581	0.0059319	329	1011	45	1693
582	0.0056081	210	1030	57	1850
583	0.0055554	159	984	39	1809
584	0.0066029	28	879	53	1730
585	0.0059321	67	811	44	1555
586	0.0064166	165	962	39	1759
587	0.00715	80	938	53	1796
588	0.0057196	325	1152	53	1979
589	0.0050775	85	930	56	1775
590	0.0074044	66	942	49	1818
591	0.0058604	170	996	51	1822
592	0.0063654	32	895	44	1758
593	0.006364	56	861	34	1666
594	0.0070972	138	1008	53	1878
595	0.0059021	192	946	35	1700
596	0.0070593	37	853	49	1669
597	0.0070843	7	757	45	1507
598	0.0061654	168	965	45	1762
599	0.0054447	250	938	65	1626
600	0.0057053	225	991	50	1757
601	0.0068248	191	973	39	1755
602	0.0055556	77	916	58	1755
603	0.0066506	217	1010	69	1803
604	0.0068917	351	1002	44	1653
605	0.0068023	282	950	50	1618
606	0.0067484	260	940	55	1620
607	0.0060251	166	989	46	1812
608	0.0061426	21	855	45	1689
609	0.00616	246	1071	44	1896
610	0.0071679	88	966	62	1844
611	0.0074244	22	910	38	1798
612	0.0061247	395	1017	45	1639
613	0.0067203	325	1092	69	1859
614	0.0066675	63	891	44	1719
615	0.0076482	94	972	61	1850
616	0.0066739	355	1011	42	1667
617	0.0060374	69	907	39	1745
618	0.0068295	14	867	42	1720
619	0.0051048	2	863	46	1724
620	0.006369	5	774	41	1543
621	0.0065469	272	968	41	1664
622	0.0065661	170	1055	46	1940
623	0.0063369	164	996	60	1828
624	0.0058199	332	1022	46	1712
625	0.0060238	36	849	42	1662
626	0.0070809	304	996	53	1688
627	0.0057458	102	865	66	1628
628	0.0069858	159	968	48	1777
629	0.0063264	176	1029	45	1882
630	0.0056731	48	865	64	1682
631	0.0048453	107	900	79	1693
632	0.0066658	38	977	45	1916
633	0.0060717	194	1025	47	1856
634	0.0068871	64	911	39	1758
635	0.0061994	67	853	50	1639
636	0.0067847	207	935	39	1663
637	0.0065327	129	915	53	1701
638	0.0050815	68	893	66	1718
639	0.0051794	129	883	39	1637
640	0.0070851	117	932	40	1747
641	0.0069132	1	950	57	1899
642	0.0064367	300	1027	55	1754
643	0.0064531	113	997	79	1881
644	0.0065031	211	955	63	1699
645	0.0052726	301	1051	43	1801
646	0.0059577	93	937	55	1781
647	0.0058656	167	1023	46	1879
648	0.0055945	237	1022	58	1807
649	0.0055844	38	894	52	1750
650	0.0053487	223	1030	48	1837
651	0.0068825	60	917	49	1774
652	0.0072391	141	910	37	1679
653	0.0053048	117	861	49	1605
654	0.006302	277	1042	48	1807
655	0.0064097	286	1048	57	1810
656	0.0071595	72	957	58	1842
657	0.0059061	1	807	84	1613
658	0.0056319	473	1108	50	1743
659	0.0050465	116	929	57	1742
660	0.0056145	136	926	76	1716
661	0.0063275	13	889	50	1765
662	0.0062436	1	839	40	1677
663	0.0060737	269	970	38	1671
664	0.006025	49	871	59	1693
665	0.0057616	0	852	56	1704
666	0.0067693	57	941	49	1825
667	0.0063745	161	913	75	1665
668	0.0067655	406	1075	46	1744
669	0.0056706	59	939	57	1819
670	0.0071701	458	1074	61	1690
671	0.0061882	295	998	46	1701
672	0.0064305	74	930	39	1786
673	0.0062898	24	879	44	1734
674	0.0057496	101	879	53	1657
675	0.0055355	207	923	58	1639
676	0.0071123	96	922	47	1748
677	0.0060946	71	940	46	1809
678	0.0067015	303	1059	40	1815
679	0.0056124	21	865	40	1709
680	0.0053788	250	1022	55	1794
681	0.0063442	179	1018	53	1857
682	0.0055907	101	893	55	1685
683	0.0057511	48	928	40	1808
684	0.0058321	169	914	42	1659
685	0.0057143	75	832	38	1589
686	0.0052818	119	949	84	1779
687	0.006222	106	946	37	1786
688	0.0055231	70	937	61	1804
689	0.0049701	467	1119	79	1771
690	0.008751	102	931	66	1760
691	0.0057665	13	841	43	1669
692	0.0059662	137	894	47	1651
693	0.0063706	55	896	42	1737
694	0.0058707	221	968	43	1715
695	0.0063066	36	837	45	1638
696	0.0071175	171	947	39	1723
697	0.0075421	258	1004	45	1750
698	0.0058007	297	1090	40	1883
699	0.0062579	141	988	48	1835
700	0.0062874	16	911	77	1806
701	0.0058724	165	914	46	1663
702	0.0074575	323	1044	47	1765
703	0.00668	281	1063	66	1845
704	0.0065798	11	860	43	1709
705	0.0055077	39	998	45	1957
706	0.0066924	21	929	48	1837
707	0.0064746	70	861	53	1652
708	0.0071712	452	1119	53	1786
709	0.0057183	167	944	58	1721
710	0.0066731	60	891	39	1722
711	0.0071346	5	910	49	1815
712	0.0068068	217	998	45	1779
713	0.0068844	319	1042	79	1765
714	0.0062718	50	1004	48	1958
715	0.0053163	105	915	39	1725
716	0.0068102	66	897	41	1728
717	0.0066005	168	989	51	1810
718	0.0062629	58	822	49	1586
719	0.0067391	311	1024	49	1737
720	0.0071613	110	911	45	1712
721	0.0068859	202	1004	41	1806
722	0.0067526	112	969	53	1826
723	0.0061017	45	906	44	1767
724	0.0071788	52	921	39	1790
725	0.0067103	261	1004	51	1747
726	0.0064165	142	942	48	1742
727	0.006699	130	893	48	1656
728	0.0063919	349	1043	55	1737
729	0.0063858	329	1063	47	1797
730	0.0062628	23	924	50	1825
731	0.0071441	567	1222	93	1877
732	0.0066356	38	853	39	1668
733	0.0069526	30	967	38	1904
734	0.0059226	88	900	46	1712
735	0.0056037	177	1006	45	1835
736	0.0066199	1	969	45	1937
737	0.0062767	126	917	44	1708
738	0.0065902	4	816	36	1628
739	0.0064851	8	975	49	1942
740	0.0064567	280	1132	75	1984
741	0.0059647	107	979	53	1851
742	0.006236	37	850	43	1663
743	0.0060362	53	950	42	1847
744	0.0059758	256	992	43	1728
745	0.0073759	32	891	45	1750
746	0.0058349	246	945	42	1644
747	0.0050844	161	919	59	1677
748	0.0062461	227	970	47	1713
749	0.0064103	108	919	56	1730
750	0.0058769	21	897	44	1773
751	0.0068774	204	1076	53	1948
752	0.006553	42	885	42	1728
753	0.0063444	28	901	52	1774
754	0.00594	187	1020	42	1853
755	0.0065926	247	1026	49	1805
756	0.0057335	363	1058	87	1753
757	0.0058534	435	1138	50	1841
758	0.0068432	79	863	43	1647
759	0.0074039	408	1056	41	1704
760	0.006352	405	1039	50	1673
761	0.0057473	301	1016	64	1731
762	0.0070201	140	985	52	1830
763	0.0070013	286	1062	52	1838
764	0.0047928	127	990	53	1853
765	0.0060093	313	1003	45	1693
766	0.0071815	162	919	39	1676
767	0.0062521	117	976	58	1835
768	0.0064079	56	952	56	1848
769	0.006494	12	929	58	1846
770	0.0070023	11	845	54	1679
771	0.0058254	33	830	36	1627
772	0.0068642	47	870	42	1693
773	0.0056476	246	959	40	1672
774	0.0061596	115	858	57	1601
775	0.0067184	17	925	47	1833
776	0.0065725	18	946	54	1874
777	0.0056884	62	926	43	1790
778	0.0063367	313	1019	60	1725
779	0.0059985	245	1013	47	1781
780	0.0065911	253	1014	45	1775
781	0.0067828	1	859	38	1717
782	0.0063771	128	897	36	1666
783	0.0065243	246	982	38	1718
784	0.0067034	7	848	38	1689
785	0.0065843	273	1067	78	1861
786	0.0069994	276	997	48	1718
787	0.0067425	287	1029	38	1771
788	0.0065678	57	910	51	1763
789	0.0068875	249	1066	57	1883
790	0.0070919	176	927	46	1678
791	0.0052711	368	1110	54	1852
792	0.0063244	6	832	41	1658
793	0.0063726	3	837	57	1671
794	0.0060631	341	1012	55	1683
795	0.0059407	70	926	54	1782
796	0.0061005	406	1058	59	1710
797	0.005878	42	849	49	1656
798	0.0056348	55	877	60	1699
799	0.0069443	83	874	49	1665
800	0.0065144	357	1071	54	1785
801	0.0056334	30	901	70	1772
802	0.0061944	102	884	46	1666
803	0.0059806	211	944	52	1677
804	0.0057323	309	986	45	1663
805	0.0062125	102	899	41	1696
806	0.0072522	58	978	45	1898
807	0.0057503	359	1113	62	1867
808	0.0062397	63	899	39	1735
809	0.0062582	10	886	57	1762
810	0.0059513	14	928	65	1842
811	0.0074706	3	960	44	1917
812	0.0070843	296	991	46	1686
813	0.0061963	22	865	42	1708
814	0.005251	178	946	46	1714
815	0.0061246	65	960	53	1855
816	0.0052649	177	918	42	1659
817	0.0059457	29	806	43	1583
818	0.006869	248	1011	54	1774
819	0.0060026	66	849	43	1632
820	0.0055005	165	915	37	1665
821	0.0072049	192	1009	49	1826
822	0.0058285	50	862	42	1674
823	0.0067658	67	914	55	1761
824	0.0061359	232	1003	42	1774
825	0.0059299	198	911	60	1624
826	0.0059576	12	856	33	1700
827	0.0066418	126	912	51	1698
828	0.0061545	239	983	54	1727
829	0.0065141	104	928	56	1752
830	0.0071984	73	985	47	1897
831	0.0065316	119	956	54	1793
832	0.0047767	141	970	52	1799
833	0.0067194	125	979	46	1833
834	0.0062433	1	887	64	1773
835	0.0078274	325	1047	50	1769
836	0.005672	140	898	50	1656
837	0.0065822	165	1046	43	1927
838	0.0060952	106	923	47	1740
839	0.0063684	151	976	51	1801
840	0.0074274	158	964	48	1770
841	0.0056486	232	966	51	1700
842	0.0064302	152	1004	57	1856
843	0.0068163	52	857	41	1662
844	0.007597	318	1090	44	1862
845	0.0064496	85	882	35	1679
846	0.0078042	127	948	42	1769
847	0.0070073	44	970	43	1896
848	0.0063657	77	906	83	1735
849	0.0072825	243	1006	41	1769
850	0.0070518	340	1050	56	1760
851	0.0054522	146	857	54	1568
852	0.0074651	102	936	41	1770
853	0.0067179	101	846	36	1591
854	0.0057103	113	920	44	1727
855	0.0067815	81	880	47	1679
856	0.0050892	170	954	36	1738
857	0.0068159	195	952	37	1709
858	0.0060922	358	1022	70	1686
859	0.0066815	1	852	63	1703
860	0.0052759	59	898	49	1737
861	0.0070819	155	952	41	1749
862	0.0068677	269	944	48	1619
863	0.0061701	21	831	44	1641
864	0.0074018	171	976	94	1781
865	0.0064564	175	971	42	1767
866	0.0061554	64	957	42	1850
867	0.0058742	124	979	42	1834
868	0.0077299	107	974	50	1841
869	0.0050757	244	983	67	1722
870	0.0063349	611	1181	56	1751
871	0.0064372	341	1044	43	1747
872	0.0063246	8	889	37	1770
873	0.0057159	189	1064	64	1939
874	0.0069728	213	1036	49	1859
875	0.0060683	76	899	52	1722
876	0.0063005	102	927	37	1752
877	0.0057774	15	890	38	1765
878	0.0068173	213	1025	51	1837
879	0.0059344	187	955	72	1723
880	0.0062972	37	921	47	1805
881	0.0058468	58	850	37	1642
882	0.0075312	318	1103	55	1888
883	0.0059187	108	998	44	1888
884	0.006029	171	969	48	1767
885	0.0063262	67	964	55	1861
886	0.0067626	64	894	60	1724
887	0.0063724	206	871	50	1536
888	0.0068002	35	912	60	1789
889	0.0063728	129	927	56	1725
890	0.0053192	260	1031	53	1802
891	0.0066515	282	1041	51	1800
892	0.0068228	343	1043	39	1743
893	0.0065427	17	868	48	1719
894	0.0058412	568	1140	44	1712
895	0.0065833	105	985	54	1865
896	0.0054632	380	994	44	1608
897	0.0070169	144	989	40	1834
898	0.0069048	399	1090	63	1781
899	0.0063272	103	987	55	1871
900	0.0052654	414	1113	59	1812
901	0.0061903	220	973	36	1726
902	0.006854	376	1024	41	1672
903	0.0047725	23	800	43	1577
904	0.0043623	130	893	57	1656
905	0.0064019	14	848	62	1682
906	0.0061746	206	957	51	1708
907	0.0066383	261	1039	50	1817
908	0.0072596	114	949	38	1784
909	0.006797	247	1019	45	1791
910	0.0064942	165	868	33	1571
911	0.0055417	28	836	50	1644
912	0.0059455	7	871	41	1735
913	0.0067316	67	932	97	1797
914	0.0062444	110	929	43	1748
915	0.0061402	471	1058	86	1645
916	0.0060352	51	952	58	1853
917	0.0064202	5	902	40	1799
918	0.0056365	47	874	48	1701
919	0.0055411	210	935	50	1660
920	0.0055561	138	915	58	1692
921	0.0056979	18	850	48	1682
922	0.0071675	225	1051	59	1877
923	0.0068607	116	990	57	1864
924	0.0072538	421	1178	65	1935
925	0.0060423	243	1014	59	1785
926	0.0064812	151	934	51	1717
927	0.0056271	47	830	37	1613
928	0.006412	384	1045	46	1706
929	0.0057563	19	851	54	1683
930	0.0067636	152	1019	47	1886
931	0.0066616	23	908	58	1793
932	0.0067712	150	969	54	1788
933	0.0068841	528	1184	48	1840
934	0.0058187	106	919	44	1732
935	0.0085979	104	915	43	1726
936	0.0065891	218	953	53	1688
937	0.0069848	128	951	53	1774
938	0.0057864	115	959	53	1803
939	0.0060186	245	1020	60	1795
940	0.006377	15	887	45	1759
941	0.0055146	192	932	49	1672
942	0.0059098	105	993	43	1881
943	0.006267	36	865	40	1694
944	0.0068444	64	877	50	1690
945	0.0060238	136	989	56	1842
946	0.0059714	114	919	69	1724
947	0.0062624	139	976	60	1813
948	0.005655	8	931	46	1854
949	0.0052039	52	856	44	1660
950	0.0071064	42	978	65	1914
951	0.0069267	425	1168	53	1911
952	0.0074351	25	880	42	1735
953	0.0078886	29	837	39	1645
954	0.0069312	209	1033	50	1857
955	0.0062331	494	1160	45	1826
956	0.0055322	91	920	73	1749
957	0.0044876	205	935	43	1665
958	0.0051439	180	954	37	1728
959	0.0061007	120	965	39	1810
960	0.0056916	94	923	42	1752
961	0.0056127	46	870	52	1694
962	0.0067264	304	1094	59	1884
963	0.0075766	8	933	48	1858
964	0.0051875	194	981	84	1768
965	0.0067895	184	958	57	1732
966	0.0081152	125	954	63	1783
967	0.006228	360	1134	40	1908
968	0.0065363	305	1035	46	1765
969	0.007249	31	900	48	1769
970	0.0064124	10	838	62	1666
971	0.0055886	23	932	48	1841
972	0.0066014	98	895	42	1692
973	0.0061547	62	814	40	1566
974	0.0059294	15	888	59	1761
975	0.0069642	25	906	43	1787
976	0.0062073	107	897	57	1687
977	0.0064673	276	1058	60	1840
978	0.0055682	59	933	42	1807
979	0.0060279	245	1026	42	1807
980	0.0068807	171	985	54	1799
981	0.0054597	80	900	52	1720
982	0.0055212	346	1096	58	1846
983	0.00736	173	978	49	1783
984	0.0069626	253	1037	46	1821
985	0.0069415	73	974	37	1875
986	0.0059156	357	1044	72	1731
987	0.0065723	440	1095	45	1750
988	0.0059982	124	951	46	1778
989	0.006982	8	849	53	1690
990	0.0056729	230	938	33	1646
991	0.0071718	50	918	40	1786
992	0.0062971	107	904	38	1701
993	0.0073409	49	906	56	1763
994	0.0056305	111	945	51	1779
995	0.0060898	133	921	35	1709
996	0.0065923	118	915	35	1712
997	0.0054493	57	904	46	1751
998	0.0066423	44	829	33	1614
999	0.0063846	67	859	57	1651
mean	0.00634438	154.571	952.847	49.717	1751.12

## Sheet: DACC_D
	time	SEq	Bal	Reg	Egal
0	0.0040945	231	919	48	1607
1	0.0045437	387	1096	51	1805
2	0.0043325	15	902	41	1789
3	0.0040208	278	986	55	1694
4	0.0039032	637	1274	55	1911
5	0.0044375	217	987	55	1757
6	0.0039258	106	909	61	1712
7	0.0041592	430	1111	49	1792
8	0.0039918	409	1104	51	1799
9	0.0040311	226	985	57	1744
10	0.0041206	105	927	51	1749
11	0.0040784	164	985	50	1806
12	0.0040513	371	1005	53	1639
13	0.0038335	90	904	50	1718
14	0.00413	95	898	46	1701
15	0.0044183	31	993	63	1955
16	0.0043221	310	1064	54	1818
17	0.0041224	105	913	69	1721
18	0.0037908	452	1178	67	1904
19	0.0039683	338	1052	59	1766
20	0.0037386	83	912	65	1741
21	0.0036196	37	934	49	1831
22	0.0040114	100	948	50	1796
23	0.00413	3	899	54	1795
24	0.0042987	122	991	80	1860
25	0.0039722	299	1023	67	1747
26	0.0037155	236	990	36	1744
27	0.0038672	78	935	50	1792
28	0.0038999	75	900	48	1725
29	0.0042917	141	965	48	1789
30	0.0039723	36	873	50	1710
31	0.0038157	371	1028	43	1685
32	0.004202	40	874	46	1708
33	0.0042397	159	1007	52	1855
34	0.003818	9	824	55	1639
35	0.0039898	341	1071	48	1801
36	0.0041009	135	926	61	1717
37	0.0040791	5	881	44	1757
38	0.0047472	274	1002	61	1730
39	0.0039238	82	976	46	1870
40	0.0037923	43	908	60	1773
41	0.0036671	0	811	52	1622
42	0.0037205	165	946	43	1727
43	0.0039074	51	990	55	1929
44	0.0040752	799	1320	71	1841
45	0.0043481	159	909	49	1659
46	0.0038394	262	1018	60	1774
47	0.0042419	175	1052	63	1929
48	0.0033739	283	990	42	1697
49	0.0036555	33	807	70	1581
50	0.0044276	142	895	40	1648
51	0.0036853	574	1227	68	1880
52	0.004222	124	910	61	1696
53	0.0037418	125	864	40	1603
54	0.0036376	36	885	57	1734
55	0.0036975	134	927	48	1720
56	0.0039146	267	965	49	1663
57	0.0043395	121	993	61	1865
58	0.004383	183	995	46	1807
59	0.0038474	205	960	46	1715
60	0.0040408	497	1176	60	1855
61	0.0039859	86	895	35	1704
62	0.0037523	85	961	47	1837
63	0.0039919	40	863	66	1686
64	0.0039763	106	934	53	1762
65	0.0035625	49	880	97	1711
66	0.0039761	231	988	49	1745
67	0.0035679	339	1026	70	1713
68	0.0040803	62	900	64	1738
69	0.0040412	85	981	48	1877
70	0.0040219	311	1053	50	1795
71	0.003895	194	935	47	1676
72	0.0036001	6	875	46	1744
73	0.0037513	204	1043	57	1882
74	0.0036803	128	935	46	1742
75	0.0042726	55	877	43	1699
76	0.006754	411	1133	38	1855
77	0.0046742	272	1100	52	1928
78	0.0042518	413	1159	66	1905
79	0.0041707	18	862	51	1706
80	0.0042044	200	1043	74	1886
81	0.0036563	229	1009	59	1789
82	0.0041028	312	1105	48	1898
83	0.0037868	223	1015	67	1807
84	0.0038087	260	998	47	1736
85	0.003973	342	1141	55	1940
86	0.003609	26	906	42	1786
87	0.0038932	134	899	62	1664
88	0.0041938	153	962	51	1771
89	0.0045004	3	902	64	1801
90	0.0045188	75	956	48	1837
91	0.0044441	20	974	50	1928
92	0.0041239	553	1215	69	1877
93	0.0034795	235	1002	47	1769
94	0.0038795	389	1108	59	1827
95	0.003844	89	935	57	1781
96	0.0040487	117	887	62	1657
97	0.0036839	12	812	42	1612
98	0.0045727	59	983	55	1907
99	0.0036318	56	900	49	1744
100	0.0040536	157	951	42	1745
101	0.0039835	196	896	47	1596
102	0.0038418	50	906	66	1762
103	0.0042698	56	1029	57	2002
104	0.0040011	43	906	45	1769
105	0.0040944	111	938	53	1765
106	0.004025	237	973	53	1709
107	0.0037925	268	1007	45	1746
108	0.0041759	74	932	40	1790
109	0.0039108	225	1003	64	1781
110	0.0043504	11	902	53	1793
111	0.0042397	437	1122	56	1807
112	0.004067	78	922	52	1766
113	0.0036733	52	809	44	1566
114	0.0041745	50	908	52	1766
115	0.0040005	141	995	49	1849
116	0.003958	604	1240	44	1876
117	0.0042511	133	896	50	1659
118	0.0040637	253	966	40	1679
119	0.004186	29	871	54	1713
120	0.0045632	912	1415	60	1918
121	0.0042124	610	1172	52	1734
122	0.004134	66	856	42	1646
123	0.0038016	86	840	46	1594
124	0.0043815	218	994	59	1770
125	0.0040137	67	940	39	1813
126	0.0042093	28	932	42	1836
127	0.0037734	470	1088	63	1706
128	0.004635	180	986	63	1792
129	0.0033366	143	995	40	1847
130	0.0041438	283	1012	54	1741
131	0.0037834	192	930	34	1668
132	0.0042883	362	1027	49	1692
133	0.0039252	68	920	65	1772
134	0.0038844	136	944	44	1752
135	0.0041569	88	1021	76	1954
136	0.003876	136	926	42	1716
137	0.0041516	314	1058	50	1802
138	0.0044268	25	918	51	1811
139	0.0041591	232	1052	47	1872
140	0.0039017	421	1138	46	1855
141	0.0038305	83	863	53	1643
142	0.0041822	101	975	45	1849
143	0.0038328	263	1031	48	1799
144	0.0042478	73	913	39	1753
145	0.0043105	508	1185	70	1862
146	0.0038586	53	880	58	1707
147	0.0041747	299	1128	62	1957
148	0.0037734	181	980	52	1779
149	0.0043298	221	1115	65	2009
150	0.0040285	52	893	64	1734
151	0.0037117	15	923	35	1831
152	0.0036368	187	999	45	1811
153	0.003451	157	869	69	1581
154	0.0038676	111	922	67	1733
155	0.004286	4	893	66	1782
156	0.0042346	13	847	53	1681
157	0.0039205	13	829	60	1645
158	0.0033455	177	847	41	1517
159	0.0042086	306	1076	62	1846
160	0.003965	24	869	47	1714
161	0.0032921	4	770	31	1536
162	0.0042001	88	980	50	1872
163	0.0037751	47	899	41	1751
164	0.0039886	40	927	48	1814
165	0.004008	197	917	55	1637
166	0.0039279	20	846	49	1672
167	0.0040728	125	954	62	1783
168	0.0042064	11	874	57	1737
169	0.0041717	641	1231	47	1821
170	0.0040807	127	985	64	1843
171	0.0040165	184	1024	56	1864
172	0.0038716	43	876	38	1709
173	0.0034933	64	891	42	1718
174	0.004266	388	1217	63	2046
175	0.0039569	58	851	52	1644
176	0.0038334	466	1094	62	1722
177	0.0038246	625	1303	77	1981
178	0.004023	411	1102	69	1793
179	0.0040253	132	898	67	1664
180	0.0042007	426	1164	54	1902
181	0.0039097	68	930	47	1792
182	0.00382	59	796	35	1533
183	0.0038869	142	1015	51	1888
184	0.0040663	289	964	49	1639
185	0.0045326	599	1233	52	1867
186	0.0040618	153	937	37	1721
187	0.0042507	908	1516	73	2124
188	0.004132	386	1028	75	1670
189	0.0038952	66	943	58	1820
190	0.00417	97	924	41	1751
191	0.0039193	99	866	49	1633
192	0.0041189	39	929	56	1819
193	0.0041224	25	922	41	1819
194	0.0039629	518	1139	58	1760
195	0.0038583	79	923	56	1767
196	0.0041021	14	895	40	1776
197	0.0036683	104	895	42	1686
198	0.0037386	259	1012	57	1765
199	0.0042631	73	892	44	1711
200	0.0038405	28	909	64	1790
201	0.0041565	49	854	40	1659
202	0.0038463	162	936	39	1710
203	0.0037833	61	914	40	1767
204	0.0041068	44	973	50	1902
205	0.0046101	166	937	74	1708
206	0.0041308	29	979	53	1929
207	0.0037434	404	1095	76	1786
208	0.0039226	137	931	49	1725
209	0.0037033	218	964	40	1710
210	0.0038969	66	943	67	1820
211	0.0043177	165	987	48	1809
212	0.0050276	65	960	60	1855
213	0.00381	159	936	47	1713
214	0.0040944	122	967	49	1812
215	0.0038519	422	1046	44	1670
216	0.003917	46	940	43	1834
217	0.0044022	3	855	55	1707
218	0.0048946	332	1063	54	1794
219	0.0040933	413	1161	54	1909
220	0.0038827	88	913	57	1738
221	0.003539	320	1017	54	1714
222	0.0038386	441	1117	41	1793
223	0.0039905	108	995	52	1882
224	0.0038311	379	1087	49	1795
225	0.005195	160	912	57	1664
226	0.0039346	140	919	51	1698
227	0.0046808	45	940	72	1835
228	0.004237	459	1219	76	1979
229	0.0040764	282	1002	57	1722
230	0.0041712	779	1314	75	1849
231	0.003876	19	924	40	1829
232	0.0040305	4	902	47	1800
233	0.0043812	331	1042	60	1753
234	0.0042322	279	1085	52	1891
235	0.004638	3	920	77	1837
236	0.0043127	131	971	58	1811
237	0.0039622	570	1150	62	1730
238	0.0042499	340	1059	37	1778
239	0.0038906	294	1059	53	1824
240	0.0041294	320	1013	62	1706
241	0.004399	681	1305	59	1929
242	0.0043083	84	866	58	1648
243	0.0043123	127	997	60	1867
244	0.0044674	335	1084	67	1833
245	0.0050401	266	1003	40	1740
246	0.0042461	73	942	64	1811
247	0.003913	55	960	43	1865
248	0.0040433	175	948	40	1721
249	0.0043008	261	1042	44	1823
250	0.003949	101	936	54	1771
251	0.0038426	198	1000	56	1802
252	0.0042724	245	1087	88	1929
253	0.0035256	141	877	54	1613
254	0.0038595	400	1031	48	1662
255	0.0039202	256	1004	40	1752
256	0.0041479	216	899	59	1582
257	0.0041037	504	1144	63	1784
258	0.0044342	369	1117	52	1865
259	0.0042933	96	962	58	1828
260	0.0040733	347	1116	73	1885
261	0.0038876	550	1188	50	1826
262	0.0036712	377	1064	53	1751
263	0.0038268	215	979	85	1743
264	0.004038	463	1166	54	1869
265	0.0044921	193	1072	45	1951
266	0.0037886	210	991	49	1772
267	0.0049976	637	1275	71	1913
268	0.0040372	188	973	58	1758
269	0.0036118	64	900	39	1736
270	0.0039916	222	965	38	1708
271	0.003758	224	922	42	1620
272	0.0040769	521	1144	51	1767
273	0.0043922	449	1112	51	1775
274	0.0037442	345	1030	45	1715
275	0.0037868	95	854	39	1613
276	0.0036992	1	874	44	1747
277	0.0036884	18	826	54	1634
278	0.0042414	195	897	37	1599
279	0.004062	184	916	73	1648
280	0.0042419	30	926	54	1822
281	0.0037549	121	937	44	1753
282	0.0041447	47	930	49	1813
283	0.0040083	67	902	50	1737
284	0.0041871	421	1132	46	1843
285	0.0040589	67	888	45	1709
286	0.0044096	35	1008	76	1981
287	0.0042848	70	947	51	1824
288	0.0040103	188	894	63	1600
289	0.0037792	257	957	43	1657
290	0.0040631	297	1000	40	1703
291	0.0047944	253	1025	71	1797
292	0.0043674	88	968	43	1848
293	0.0037756	32	839	36	1646
294	0.0042851	151	1019	46	1887
295	0.0043402	292	1013	52	1734
296	0.0039743	136	888	46	1640
297	0.0037797	18	946	70	1874
298	0.004452	185	974	58	1763
299	0.0037384	266	1078	50	1890
300	0.0044333	24	939	55	1854
301	0.004106	64	909	41	1754
302	0.0039974	14	956	43	1898
303	0.0036177	29	875	48	1721
304	0.0038324	42	840	45	1638
305	0.004188	55	973	44	1891
306	0.0043632	37	918	52	1799
307	0.0044519	122	952	62	1782
308	0.0038924	83	906	47	1729
309	0.0039124	400	1144	52	1888
310	0.0037484	294	1018	56	1742
311	0.0042921	357	1126	59	1895
312	0.0034264	96	865	45	1634
313	0.0037905	74	911	48	1748
314	0.0043448	150	1022	52	1894
315	0.0046697	599	1242	65	1885
316	0.0036563	100	963	50	1826
317	0.0040341	248	982	54	1716
318	0.0037837	195	945	48	1695
319	0.0043815	565	1174	57	1783
320	0.0037563	131	901	56	1671
321	0.0038663	317	1033	53	1749
322	0.003932	417	1118	47	1819
323	0.0043439	169	985	69	1801
324	0.0040813	92	967	51	1842
325	0.0037953	174	960	45	1746
326	0.0041946	168	942	49	1716
327	0.0040303	335	987	52	1639
328	0.0039741	54	888	51	1722
329	0.0041966	92	913	56	1734
330	0.0044304	89	901	47	1713
331	0.0040383	414	1081	61	1748
332	0.0043487	120	930	56	1740
333	0.0040719	196	1026	58	1856
334	0.0044243	327	1054	56	1781
335	0.0039206	422	1084	43	1746
336	0.0042572	30	918	55	1806
337	0.0039025	26	951	45	1876
338	0.0038829	82	897	51	1712
339	0.0044977	133	921	58	1709
340	0.0043909	786	1289	53	1792
341	0.0041262	21	902	39	1783
342	0.0039757	42	915	52	1788
343	0.0041881	131	945	77	1759
344	0.0041897	406	1167	80	1928
345	0.0036686	267	1059	51	1851
346	0.0036201	209	966	55	1723
347	0.0046628	314	1083	78	1852
348	0.0039685	128	976	45	1824
349	0.0037429	58	906	38	1754
350	0.003959	17	838	45	1659
351	0.0044943	212	1026	53	1840
352	0.0052231	330	1042	58	1754
353	0.003665	6	869	46	1732
354	0.0040981	114	959	58	1804
355	0.00386	171	886	54	1601
356	0.003859	181	965	50	1749
357	0.00398	134	929	46	1724
358	0.0042725	731	1246	53	1761
359	0.0038676	259	1095	57	1931
360	0.0041579	285	1069	67	1853
361	0.004244	219	1081	66	1943
362	0.0038462	306	1121	65	1936
363	0.004499	148	933	50	1718
364	0.0040066	196	964	53	1732
365	0.0034135	143	901	49	1659
366	0.0041624	25	848	60	1671
367	0.0041559	667	1282	80	1897
368	0.004257	106	913	50	1720
369	0.0040925	286	1038	58	1790
370	0.0040683	380	1087	50	1794
371	0.0044554	561	1207	62	1853
372	0.0040902	778	1390	73	2002
373	0.0041734	45	882	37	1719
374	0.0040393	274	1091	59	1908
375	0.0040085	51	868	44	1685
376	0.004342	71	842	55	1613
377	0.0040967	85	892	41	1699
378	0.0040283	81	949	50	1817
379	0.0043224	142	985	58	1828
380	0.0038266	68	919	53	1770
381	0.0042473	4	936	69	1868
382	0.0042718	492	1154	50	1816
383	0.0042126	466	1057	49	1648
384	0.0042339	13	966	76	1919
385	0.0040105	323	1146	61	1969
386	0.0042247	144	959	55	1774
387	0.0036459	123	885	62	1647
388	0.0038242	14	918	61	1822
389	0.0039084	22	847	41	1672
390	0.0042572	681	1293	74	1905
391	0.0052828	76	896	48	1716
392	0.0041027	35	948	57	1861
393	0.0039389	175	951	37	1727
394	0.005353	106	940	50	1774
395	0.0038246	124	943	46	1762
396	0.0038761	32	903	42	1774
397	0.0042359	267	1062	52	1857
398	0.0040336	475	1218	63	1961
399	0.0046677	48	956	54	1864
400	0.0041908	410	1153	57	1896
401	0.0039276	209	962	39	1715
402	0.0038258	234	1041	59	1848
403	0.0035839	68	919	42	1770
404	0.0045703	471	1189	65	1907
405	0.0037126	48	835	48	1622
406	0.0037523	13	893	49	1773
407	0.0041295	134	957	47	1780
408	0.0041371	83	955	58	1827
409	0.0041158	294	1100	43	1906
410	0.0039388	58	865	61	1672
411	0.0037404	145	908	41	1671
412	0.0038408	106	954	56	1802
413	0.0047384	459	1155	56	1851
414	0.0041852	94	928	49	1762
415	0.0038353	155	875	46	1595
416	0.0040861	38	875	36	1712
417	0.0039821	250	1025	49	1800
418	0.0038358	336	1032	54	1728
419	0.0037697	172	882	34	1592
420	0.0039031	31	916	47	1801
421	0.004308	223	1034	51	1845
422	0.0044213	531	1189	75	1847
423	0.0047661	1101	1566	81	2031
424	0.0040072	102	934	62	1766
425	0.0045629	55	948	51	1841
426	0.0039957	3	882	49	1761
427	0.0042022	372	1150	48	1928
428	0.0044454	34	915	46	1796
429	0.0040474	252	1041	53	1830
430	0.0042564	239	1057	59	1875
431	0.0038647	170	931	41	1692
432	0.0038604	26	848	36	1670
433	0.0043933	577	1213	62	1849
434	0.0042331	199	1073	57	1947
435	0.0040003	900	1482	71	2064
436	0.0037234	61	1011	49	1961
437	0.0038451	213	1028	49	1843
438	0.0042883	377	1142	49	1907
439	0.0045319	83	999	66	1915
440	0.0041152	128	983	53	1838
441	0.0037778	158	927	72	1696
442	0.0037845	113	877	50	1641
443	0.0039197	211	1016	46	1821
444	0.0044316	174	882	55	1590
445	0.0040086	201	895	61	1589
446	0.0043091	223	1013	64	1803
447	0.0038693	99	934	62	1769
448	0.0042692	1	918	45	1835
449	0.0036577	20	829	38	1638
450	0.0038219	336	995	53	1654
451	0.0040101	36	944	70	1852
452	0.0052609	145	967	52	1789
453	0.0045513	226	1013	43	1800
454	0.0048155	482	1161	55	1840
455	0.0045443	60	967	57	1874
456	0.0039821	424	1144	84	1864
457	0.0041172	41	900	52	1759
458	0.0037988	8	923	49	1838
459	0.0042527	254	1126	57	1998
460	0.0042347	146	989	54	1832
461	0.0041585	277	1023	45	1769
462	0.0043145	162	936	47	1710
463	0.0038184	100	862	42	1624
464	0.0041658	72	921	51	1770
465	0.0036852	64	969	51	1874
466	0.0040948	145	889	52	1633
467	0.0042352	191	932	50	1673
468	0.0038109	424	1181	70	1938
469	0.0038926	380	1080	63	1780
470	0.0035038	152	884	44	1616
471	0.0046703	26	874	45	1722
472	0.0041947	346	1117	42	1888
473	0.0041071	198	1017	46	1836
474	0.0041323	423	1117	53	1811
475	0.003917	192	990	49	1788
476	0.004189	139	932	59	1725
477	0.0040254	217	988	58	1759
478	0.0040128	495	1216	68	1937
479	0.0038352	37	911	59	1785
480	0.0040061	132	993	47	1854
481	0.0037774	153	1025	44	1897
482	0.0038754	180	1033	51	1886
483	0.0039372	117	951	51	1785
484	0.0042638	30	910	43	1790
485	0.0044868	4	860	58	1716
486	0.0042316	82	954	58	1826
487	0.0042275	94	996	60	1898
488	0.0047223	353	1122	72	1891
489	0.0039726	125	1020	48	1915
490	0.00372	142	950	40	1758
491	0.0045437	363	1057	64	1751
492	0.0037747	275	1013	55	1751
493	0.0039097	287	1038	51	1789
494	0.0036967	127	877	66	1627
495	0.0039169	276	1056	54	1836
496	0.0049711	211	1056	46	1901
497	0.0042002	216	1062	42	1908
498	0.0038113	239	983	43	1727
499	0.0033183	84	894	47	1704
500	0.0040717	65	880	51	1695
501	0.0039555	85	931	77	1777
502	0.0034083	3	887	53	1771
503	0.0042973	86	984	62	1882
504	0.0038994	28	825	45	1622
505	0.0036809	91	969	59	1847
506	0.0039145	84	929	52	1774
507	0.0052003	73	961	49	1849
508	0.0044322	180	1023	73	1866
509	0.0053421	205	1046	40	1887
510	0.0045119	599	1194	57	1789
511	0.0044724	302	1016	45	1730
512	0.0041446	285	1059	46	1833
513	0.0037047	39	860	32	1681
514	0.0036016	106	913	64	1720
515	0.00426	200	1048	64	1896
516	0.0040159	287	1105	50	1923
517	0.0041397	40	930	57	1820
518	0.0042194	94	993	62	1892
519	0.0041187	105	1024	52	1943
520	0.0036704	66	864	33	1662
521	0.003848	548	1283	46	2018
522	0.0041365	301	1040	60	1779
523	0.0044367	43	930	50	1817
524	0.0043313	273	1046	47	1819
525	0.00418	109	1023	54	1937
526	0.0040915	90	922	56	1754
527	0.003625	487	1121	49	1755
528	0.0040224	58	879	75	1700
529	0.0040707	193	932	43	1671
530	0.004224	9	910	69	1811
531	0.0038817	199	971	57	1743
532	0.0042076	480	1083	50	1686
533	0.0044271	17	857	46	1697
534	0.0044313	306	1077	65	1848
535	0.0044176	186	1024	61	1862
536	0.0039888	99	913	55	1727
537	0.0038282	38	825	54	1612
538	0.0042988	448	1103	52	1758
539	0.0040579	551	1239	57	1927
540	0.0040656	727	1289	55	1851
541	0.0040467	161	1008	43	1855
542	0.0034253	70	852	37	1634
543	0.0044519	95	973	47	1851
544	0.0039803	212	923	58	1634
545	0.0042582	49	928	55	1807
546	0.0037774	183	1033	79	1883
547	0.004432	279	1093	52	1907
548	0.0049769	493	1236	50	1979
549	0.0036103	150	963	46	1776
550	0.0036995	216	962	57	1708
551	0.0040307	285	1042	63	1799
552	0.0039296	122	907	49	1692
553	0.0037474	651	1201	67	1751
554	0.0044629	24	960	58	1896
555	0.0041817	56	943	45	1830
556	0.0041602	106	876	41	1646
557	0.0037572	22	823	52	1624
558	0.0037546	40	932	42	1824
559	0.0042876	164	967	56	1770
560	0.0039153	139	906	57	1673
561	0.0043595	187	1056	50	1925
562	0.004336	378	1142	55	1906
563	0.0038036	30	885	44	1740
564	0.0038037	136	991	61	1846
565	0.0040341	495	1096	63	1697
566	0.0041047	43	916	60	1789
567	0.0038865	46	967	47	1888
568	0.0037804	332	1065	31	1798
569	0.004602	296	1042	63	1788
570	0.0041087	80	979	47	1878
571	0.0040644	176	976	54	1776
572	0.0045864	434	1121	73	1808
573	0.004128	319	1065	60	1811
574	0.0037216	67	839	58	1611
575	0.0039947	224	982	43	1740
576	0.0033262	19	861	40	1703
577	0.0036495	416	1043	53	1670
578	0.0046201	599	1225	51	1851
579	0.0034705	590	1204	56	1818
580	0.0039954	177	1007	62	1837
581	0.0043397	48	896	45	1744
582	0.0044693	52	956	57	1860
583	0.0042848	7	924	42	1841
584	0.0037951	461	1084	59	1707
585	0.0037097	67	811	44	1555
586	0.0042495	582	1189	61	1796
587	0.0043471	76	952	53	1828
588	0.0037481	81	1040	53	1999
589	0.004357	342	1078	57	1814
590	0.0038684	54	934	52	1814
591	0.0038369	214	1001	51	1788
592	0.0040148	213	980	48	1747
593	0.0049312	222	992	48	1762
594	0.004161	1	937	64	1873
595	0.003657	192	946	35	1700
596	0.0042354	210	947	49	1684
597	0.0033195	72	802	45	1532
598	0.0041127	94	955	45	1816
599	0.0041475	333	1041	56	1749
600	0.0042579	442	1103	54	1764
601	0.0041843	33	908	39	1783
602	0.0039835	77	916	58	1755
603	0.004498	282	1034	69	1786
604	0.0038221	307	1047	64	1787
605	0.0036059	149	932	50	1715
606	0.0039036	260	940	55	1620
607	0.0041964	23	911	67	1799
608	0.0042393	21	855	45	1689
609	0.0038812	50	966	46	1882
610	0.0046666	121	991	45	1861
611	0.00402	190	1030	66	1870
612	0.0042228	321	1017	75	1713
613	0.0038769	551	1220	53	1889
614	0.0038037	63	891	44	1719
615	0.0040656	132	1001	61	1870
616	0.0042705	179	936	44	1693
617	0.004204	303	1042	55	1781
618	0.0034831	14	867	42	1720
619	0.0040327	2	863	46	1724
620	0.0038228	5	774	41	1543
621	0.0037082	12	845	66	1678
622	0.0042964	39	986	47	1933
623	0.0034939	191	1002	60	1813
624	0.0039478	140	970	61	1800
625	0.0038087	9	839	42	1669
626	0.003942	105	914	70	1723
627	0.0043063	2	838	66	1674
628	0.0040953	33	911	48	1789
629	0.0039494	571	1247	68	1923
630	0.0041344	556	1169	64	1782
631	0.0043593	136	925	79	1714
632	0.0038637	320	1088	52	1856
633	0.0051489	109	1033	47	1957
634	0.0041785	400	1147	39	1894
635	0.00454	380	1042	53	1704
636	0.0039403	207	935	39	1663
637	0.0041283	369	1070	53	1771
638	0.0042592	8	881	66	1754
639	0.0038567	129	883	39	1637
640	0.0038479	141	966	48	1791
641	0.0043853	286	1093	57	1900
642	0.004035	150	973	64	1796
643	0.0046726	381	1162	63	1943
644	0.0045059	64	914	55	1764
645	0.0035577	529	1204	66	1879
646	0.0040388	186	1015	64	1844
647	0.0042622	81	983	50	1885
648	0.0047646	334	1084	58	1834
649	0.0040955	313	1076	89	1839
650	0.0039258	40	915	48	1790
651	0.0037651	197	1003	44	1809
652	0.0041792	46	902	51	1758
653	0.0040788	297	980	49	1663
654	0.0041399	234	1034	48	1834
655	0.0045925	399	1113	57	1827
656	0.0039889	72	957	58	1842
657	0.0037783	176	912	90	1648
658	0.004158	535	1204	59	1873
659	0.0045959	541	1216	56	1891
660	0.0041562	212	988	76	1764
661	0.0037023	55	912	50	1769
662	0.0038416	52	871	40	1690
663	0.0037234	233	941	38	1649
664	0.0035043	35	883	59	1731
665	0.0043429	233	1011	80	1789
666	0.0035282	57	941	49	1825
667	0.003768	161	913	75	1665
668	0.0044434	406	1075	46	1744
669	0.0042788	59	939	57	1819
670	0.0043276	280	1010	64	1740
671	0.0045675	57	895	57	1733
672	0.0038603	83	944	37	1805
673	0.0042195	341	1047	57	1753
674	0.0036819	332	1051	58	1770
675	0.0039418	221	984	58	1747
676	0.0039341	96	922	47	1748
677	0.0038719	397	1120	51	1843
678	0.0040052	25	922	41	1819
679	0.004025	135	927	40	1719
680	0.0042371	305	1003	55	1701
681	0.0044392	179	1018	53	1857
682	0.0039018	166	943	55	1720
683	0.0039172	28	924	40	1820
684	0.0047467	69	895	56	1721
685	0.0034718	362	1024	48	1686
686	0.0041236	119	949	84	1779
687	0.0045045	255	1053	57	1851
688	0.0039385	70	937	61	1804
689	0.0041859	75	964	79	1853
690	0.0040909	309	1063	72	1817
691	0.0035012	13	841	43	1669
692	0.0045421	375	1093	47	1811
693	0.0041522	143	950	42	1757
694	0.0041626	72	923	52	1774
695	0.0039393	184	904	50	1624
696	0.0040979	148	963	42	1778
697	0.0041093	155	977	48	1799
698	0.0037573	118	1017	42	1916
699	0.0040857	278	1057	50	1836
700	0.0047403	458	1179	61	1900
701	0.0041679	33	881	55	1729
702	0.0040998	242	1018	46	1794
703	0.0041267	161	1007	66	1853
704	0.0038714	196	986	70	1776
705	0.0040169	452	1227	59	2002
706	0.0048783	21	929	48	1837
707	0.0037747	107	885	53	1663
708	0.0038755	358	1095	53	1832
709	0.004041	14	886	58	1758
710	0.0040706	166	965	61	1764
711	0.0042415	88	957	49	1826
712	0.0039432	20	928	45	1836
713	0.0038641	319	1042	79	1765
714	0.0040269	145	1048	48	1951
715	0.0039298	127	935	39	1743
716	0.0041552	306	1068	54	1830
717	0.0039951	150	948	51	1746
718	0.0041136	20	812	49	1604
719	0.0040266	126	998	49	1870
720	0.0039002	6	879	45	1752
721	0.0040808	202	1004	41	1806
722	0.0046336	470	1163	57	1856
723	0.0045725	502	1136	83	1770
724	0.0037232	52	921	39	1790
725	0.0041143	221	1031	54	1841
726	0.004216	191	961	59	1731
727	0.0037162	193	942	73	1691
728	0.0038234	246	1032	64	1818
729	0.0044311	683	1302	66	1921
730	0.0038199	23	924	50	1825
731	0.0044408	311	1117	93	1923
732	0.004162	28	849	39	1670
733	0.0042017	53	1001	41	1949
734	0.0039867	33	876	46	1719
735	0.0044264	765	1346	50	1927
736	0.0043127	23	973	45	1923
737	0.0038611	382	1037	48	1692
738	0.0041619	4	816	36	1628
739	0.0043394	8	975	49	1942
740	0.0041996	188	1097	75	2006
741	0.0038821	321	1118	52	1915
742	0.0040948	94	879	43	1664
743	0.0038733	53	950	42	1847
744	0.0041084	65	879	43	1693
745	0.0041393	568	1184	52	1800
746	0.0035144	47	852	50	1657
747	0.0040596	196	965	59	1734
748	0.0037677	123	953	47	1783
749	0.0040218	56	902	56	1748
750	0.0035886	169	997	44	1825
751	0.0041939	205	1076	60	1947
752	0.0042931	202	1000	46	1798
753	0.0043551	28	901	52	1774
754	0.0042278	482	1181	46	1880
755	0.0047531	140	996	49	1852
756	0.0043567	116	940	56	1764
757	0.0040972	167	1009	93	1851
758	0.003405	122	899	43	1676
759	0.0041433	59	914	47	1769
760	0.0042322	304	1017	50	1730
761	0.004445	301	1016	64	1731
762	0.0041699	140	985	52	1830
763	0.0037724	175	1012	52	1849
764	0.0042484	291	1102	53	1913
765	0.0046942	755	1271	67	1787
766	0.003769	162	919	39	1676
767	0.0037481	279	1091	54	1903
768	0.0041658	7	937	56	1867
769	0.0040643	12	929	58	1846
770	0.003887	347	1043	57	1739
771	0.0040493	14	833	48	1652
772	0.0039498	358	1064	68	1770
773	0.0041748	181	936	41	1691
774	0.0041196	80	855	65	1630
775	0.0035636	17	925	47	1833
776	0.0041715	338	1122	82	1906
777	0.0036912	134	963	43	1792
778	0.0046993	400	1041	64	1682
779	0.004537	100	942	55	1784
780	0.0038627	0	920	70	1840
781	0.0040822	170	958	42	1746
782	0.0045035	5	852	36	1699
783	0.0039687	74	911	52	1748
784	0.0036474	380	1052	67	1724
785	0.0039789	183	1046	61	1909
786	0.0037492	20	913	58	1806
787	0.0041399	287	1049	38	1811
788	0.0040966	57	910	51	1763
789	0.0039354	68	983	57	1898
790	0.0032028	55	875	65	1695
791	0.0043515	321	1070	76	1819
792	0.0031727	91	881	41	1671
793	0.0038204	69	890	57	1711
794	0.0041189	92	899	55	1706
795	0.0038836	70	926	54	1782
796	0.0040468	18	889	59	1760
797	0.0039788	42	849	49	1656
798	0.0041778	293	1009	60	1725
799	0.0041395	83	874	49	1665
800	0.0045254	251	1021	58	1791
801	0.0038999	308	1077	64	1846
802	0.0039573	583	1180	77	1777
803	0.004302	112	907	52	1702
804	0.0038206	70	870	45	1670
805	0.003793	102	899	41	1696
806	0.0042304	58	978	45	1898
807	0.0036924	81	985	62	1889
808	0.0035701	124	923	39	1722
809	0.0038376	58	922	57	1786
810	0.0038565	205	1048	51	1891
811	0.0037834	101	996	54	1891
812	0.0039396	178	939	38	1700
813	0.0035445	22	865	42	1708
814	0.0039922	230	979	46	1728
815	0.0039484	62	956	53	1850
816	0.0038849	177	918	42	1659
817	0.0036772	234	945	73	1656
818	0.0036667	137	960	54	1783
819	0.004064	455	1091	51	1727
820	0.0044454	165	915	37	1665
821	0.0044003	25	940	41	1855
822	0.0038056	39	860	42	1681
823	0.0044544	370	1096	55	1822
824	0.0039059	157	990	50	1823
825	0.0041788	574	1156	51	1738
826	0.0043495	43	886	33	1729
827	0.0036918	375	1057	47	1739
828	0.0039469	516	1183	67	1850
829	0.0040412	188	936	62	1684
830	0.0041263	148	1040	58	1932
831	0.0038037	42	924	54	1806
832	0.0039966	177	988	52	1799
833	0.0040195	39	950	63	1861
834	0.004461	175	976	64	1777
835	0.0039325	65	948	53	1831
836	0.003804	88	875	50	1662
837	0.0043826	133	1023	43	1913
838	0.0038992	253	1023	53	1793
839	0.0042787	151	976	51	1801
840	0.0040407	158	964	48	1770
841	0.0037171	178	939	51	1700
842	0.0043089	152	1004	57	1856
843	0.004019	193	948	41	1703
844	0.0042711	318	1090	44	1862
845	0.0034632	279	967	40	1655
846	0.0039064	95	954	42	1813
847	0.0042627	428	1196	68	1964
848	0.0041021	147	950	83	1753
849	0.0039654	169	986	43	1803
850	0.0041269	253	1068	56	1883
851	0.0037644	146	857	54	1568
852	0.0036557	42	911	45	1780
853	0.0045414	101	846	36	1591
854	0.0047381	44	893	66	1742
855	0.0038338	81	880	47	1679
856	0.0040785	170	954	36	1738
857	0.0040229	195	952	37	1709
858	0.0037513	21	867	64	1713
859	0.0036624	133	920	51	1707
860	0.0037236	59	898	49	1737
861	0.0037262	7	880	41	1753
862	0.0040996	714	1305	72	1896
863	0.0035168	69	868	44	1667
864	0.0040642	81	968	94	1855
865	0.0041262	34	918	42	1802
866	0.0045241	348	1077	49	1806
867	0.0049179	124	979	42	1834
868	0.00411	308	1090	50	1872
869	0.0039728	573	1173	86	1773
870	0.0045722	120	961	45	1802
871	0.0040671	118	947	46	1776
872	0.0038064	259	1058	45	1857
873	0.0043438	17	955	64	1893
874	0.0039643	585	1255	61	1925
875	0.0036225	198	993	52	1788
876	0.0035773	102	927	37	1752
877	0.0036929	174	928	71	1682
878	0.0040383	16	935	49	1854
879	0.0038539	274	1043	66	1812
880	0.0044137	37	921	47	1805
881	0.0043149	245	965	47	1685
882	0.0043799	318	1103	55	1888
883	0.0039959	108	998	44	1888
884	0.0036561	171	969	48	1767
885	0.0038112	137	1002	56	1867
886	0.004445	64	894	60	1724
887	0.003746	206	871	50	1536
888	0.0042724	35	912	60	1789
889	0.0035884	212	979	42	1746
890	0.0040953	138	978	53	1818
891	0.0036731	36	923	51	1810
892	0.0043451	258	1057	43	1856
893	0.0035975	17	868	48	1719
894	0.0038584	218	1013	53	1808
895	0.0040594	247	1067	54	1887
896	0.0039434	278	1011	49	1744
897	0.00426	257	1039	42	1821
898	0.0038884	341	1062	60	1783
899	0.0041755	16	937	56	1858
900	0.0047653	497	1171	64	1845
901	0.0045031	220	973	36	1726
902	0.0042253	54	901	57	1748
903	0.0038971	23	800	43	1577
904	0.0036147	42	871	55	1700
905	0.0039827	14	848	62	1682
906	0.0041463	206	957	51	1708
907	0.0040291	111	978	50	1845
908	0.0041671	383	1133	50	1883
909	0.0044482	247	1019	45	1791
910	0.0037053	15	800	44	1585
911	0.0039911	229	944	50	1659
912	0.0036087	148	927	41	1706
913	0.0042554	340	1095	76	1850
914	0.0037805	110	929	43	1748
915	0.0037945	308	1009	66	1710
916	0.0044338	294	1091	65	1888
917	0.0040177	465	1168	59	1871
918	0.0039092	171	950	48	1729
919	0.0037885	210	935	50	1660
920	0.0040656	138	915	58	1692
921	0.0041625	214	977	49	1740
922	0.0041863	106	999	55	1892
923	0.0042905	116	990	57	1864
924	0.004307	85	1036	65	1987
925	0.0045396	226	1009	59	1792
926	0.0040789	365	1092	57	1819
927	0.0037142	45	830	37	1615
928	0.0045572	129	953	55	1777
929	0.0035934	19	851	54	1683
930	0.0042173	244	1056	47	1868
931	0.0040427	23	908	58	1793
932	0.0038955	321	1063	50	1805
933	0.0043398	98	993	48	1888
934	0.0041484	132	941	41	1750
935	0.0039079	56	904	43	1752
936	0.0043337	260	981	53	1702
937	0.0043595	636	1234	53	1832
938	0.0043755	100	955	57	1810
939	0.0044265	245	1020	60	1795
940	0.0038611	378	1112	57	1846
941	0.0041106	404	1068	49	1732
942	0.004754	259	1073	43	1887
943	0.0035861	37	877	43	1717
944	0.0048726	157	925	50	1693
945	0.0039927	136	989	56	1842
946	0.0038927	161	949	69	1737
947	0.0040655	29	923	60	1817
948	0.004579	8	931	46	1854
949	0.0041697	262	982	44	1702
950	0.004297	292	1106	70	1920
951	0.003994	151	1032	53	1913
952	0.0036797	10	870	43	1730
953	0.0041838	82	878	39	1674
954	0.004504	12	955	50	1898
955	0.0041107	418	1128	45	1838
956	0.0043594	6	882	66	1758
957	0.0043205	205	935	43	1665
958	0.003862	170	967	62	1764
959	0.0041356	489	1173	40	1857
960	0.0041553	94	923	42	1752
961	0.0039647	46	870	52	1694
962	0.0042723	116	1006	59	1896
963	0.0040053	34	949	48	1864
964	0.0040487	36	918	84	1800
965	0.0040417	289	1062	57	1835
966	0.0041413	125	954	63	1783
967	0.0039627	94	1046	48	1998
968	0.0036817	88	933	56	1778
969	0.004662	65	920	48	1775
970	0.0037111	68	904	62	1740
971	0.0040414	9	964	49	1919
972	0.0049334	344	1077	50	1810
973	0.0039377	71	851	51	1631
974	0.0044773	104	945	65	1786
975	0.0036564	116	958	43	1800
976	0.0041167	402	1037	63	1672
977	0.0041588	760	1413	60	2066
978	0.0038678	94	936	45	1778
979	0.0041784	294	1060	52	1826
980	0.0039861	65	922	54	1779
981	0.0047317	709	1298	66	1887
982	0.0043803	67	971	58	1875
983	0.0035845	85	939	45	1793
984	0.0042744	77	967	50	1857
985	0.0044358	678	1342	53	2006
986	0.0040695	540	1143	72	1746
987	0.0048855	163	965	65	1767
988	0.0039216	104	945	46	1786
989	0.0037389	368	1059	53	1750
990	0.0036889	76	870	44	1664
991	0.0037371	85	933	40	1781
992	0.0037318	449	1079	49	1709
993	0.0041048	1	892	56	1783
994	0.0046184	674	1281	80	1888
995	0.0042512	143	963	38	1783
996	0.0042203	0	873	52	1746
997	0.0043122	115	940	46	1765
998	0.003604	137	868	36	1599
999	0.0041563	24	842	57	1660
mean	0.00407307	194.652	988.024	53.444	1781.4

## Sheet: PowerBalance_SEq
	time	SEq	Bal	Reg	Egal
0	0.0034447	231	919	48	1607
1	0.0033644	86	914	60	1742
2	0.0022136	15	902	41	1789
3	0.0023946	20	889	55	1758
4	0.0035996	129	994	40	1859
5	0.0027211	10	878	55	1746
6	0.0034324	106	909	61	1712
7	0.002246	20	884	46	1748
8	0.003405	42	891	51	1740
9	0.0017585	2	837	35	1672
10	0.0033268	28	887	51	1746
11	0.0026048	4	903	50	1802
12	0.0033819	56	825	45	1594
13	0.0034915	24	870	50	1716
14	0.0034514	40	863	46	1686
15	0.0021216	6	979	63	1952
16	0.0035306	28	907	54	1786
17	0.0034186	37	873	69	1709
18	0.0034294	27	970	52	1913
19	0.0026536	20	910	59	1800
20	0.0033881	63	865	68	1667
21	0.0034305	47	928	49	1809
22	0.0033709	100	948	50	1796
23	0.0027094	3	899	54	1795
24	0.0023028	1	909	42	1817
25	0.0021228	13	852	56	1691
26	0.0035125	30	877	46	1724
27	0.003372	36	904	50	1772
28	0.0035151	56	887	48	1718
29	0.0034361	52	935	42	1818
30	0.0033873	77	899	50	1721
31	0.0033933	83	890	51	1697
32	0.0034159	40	874	46	1708
33	0.0033437	116	957	63	1798
34	0.0017806	9	824	55	1639
35	0.0034117	34	875	46	1716
36	0.0035558	34	893	61	1752
37	0.0018656	5	881	44	1757
38	0.0034475	45	894	61	1743
39	0.0033406	17	926	41	1835
40	0.0021116	4	891	60	1778
41	0.0019974	0	811	52	1622
42	0.0021353	14	869	43	1724
43	0.0034103	20	979	54	1938
44	0.0034167	212	1035	50	1858
45	0.0034202	23	866	49	1709
46	0.0023966	0	844	50	1688
47	0.0036518	86	1010	63	1934
48	0.0034467	74	838	33	1602
49	0.0023579	33	807	70	1581
50	0.0034353	78	855	40	1632
51	0.0034884	131	1009	58	1887
52	0.0034418	124	910	61	1696
53	0.0033872	41	832	40	1623
54	0.0033335	36	885	57	1734
55	0.0033716	46	891	53	1736
56	0.0034608	71	879	38	1687
57	0.0035668	121	993	61	1865
58	0.0035408	17	935	46	1853
59	0.0033816	50	907	46	1764
60	0.0033954	86	949	44	1812
61	0.0033832	51	877	35	1703
62	0.0034038	18	937	47	1856
63	0.0034719	40	863	66	1686
64	0.0034901	106	934	53	1762
65	0.0021148	49	880	97	1711
66	0.0026346	20	845	44	1670
67	0.0034539	112	952	78	1792
68	0.0025676	62	900	64	1738
69	0.0035567	85	981	48	1877
70	0.003317	44	932	91	1820
71	0.0030374	1	850	47	1699
72	0.0020545	0	852	42	1704
73	0.0017495	11	919	41	1827
74	0.0034701	128	935	46	1742
75	0.0028441	15	866	43	1717
76	0.0035129	52	965	39	1878
77	0.00346	60	958	56	1856
78	0.0034623	54	960	63	1866
79	0.0034336	18	862	51	1706
80	0.0024417	13	914	45	1815
81	0.0021287	21	908	49	1795
82	0.0034012	65	971	44	1877
83	0.00246	5	946	62	1887
84	0.0034629	44	883	43	1722
85	0.0034683	92	952	55	1812
86	0.0025768	26	906	42	1786
87	0.0033974	73	863	38	1653
88	0.0033708	153	962	51	1771
89	0.003159	3	902	64	1801
90	0.0034259	36	895	48	1754
91	0.0029728	20	974	50	1928
92	0.0034372	84	944	51	1804
93	0.0033314	43	849	45	1655
94	0.0019594	8	852	50	1696
95	0.0034615	26	900	57	1774
96	0.0034464	104	905	62	1706
97	0.0034625	15	848	42	1681
98	0.0035012	41	968	58	1895
99	0.0033678	35	870	49	1705
100	0.0031989	6	876	42	1746
101	0.0021612	5	812	43	1619
102	0.0033879	50	906	66	1762
103	0.0034055	13	1005	57	1997
104	0.0034416	46	908	45	1770
105	0.0033932	95	959	53	1823
106	0.0034671	108	906	53	1704
107	0.0034574	68	924	76	1780
108	0.0034635	74	932	40	1790
109	0.00289	40	907	64	1774
110	0.0030563	11	902	53	1793
111	0.0033368	18	886	56	1754
112	0.0034055	84	923	62	1762
113	0.0034622	52	809	44	1566
114	0.0033847	50	908	52	1766
115	0.0034097	66	928	49	1790
116	0.0033575	22	945	60	1868
117	0.0033774	49	823	36	1597
118	0.0023209	4	854	67	1704
119	0.0022932	29	871	54	1713
120	0.0035175	110	925	71	1740
121	0.003433	58	929	55	1800
122	0.0033781	66	856	42	1646
123	0.0022607	19	823	48	1627
124	0.0034399	67	920	59	1773
125	0.0034468	29	939	39	1849
126	0.0034053	28	932	42	1836
127	0.003377	25	836	33	1647
128	0.0021436	12	881	63	1750
129	0.0033386	69	945	40	1821
130	0.0033336	217	979	50	1741
131	0.0035775	98	891	38	1684
132	0.0034474	116	939	49	1762
133	0.0026191	9	894	65	1779
134	0.0034154	23	892	44	1761
135	0.0033841	88	1021	76	1954
136	0.0033864	92	909	43	1726
137	0.0035488	83	922	43	1761
138	0.0023215	25	918	51	1811
139	0.0032917	77	937	45	1797
140	0.0024805	30	908	41	1786
141	0.0033608	83	863	53	1643
142	0.0034237	20	955	45	1890
143	0.0034823	54	903	47	1752
144	0.0026629	15	894	39	1773
145	0.00326	33	924	70	1815
146	0.0030551	53	880	58	1707
147	0.0024759	4	970	79	1936
148	0.0033715	143	995	52	1847
149	0.0033926	77	996	38	1915
150	0.003432	52	893	64	1734
151	0.0023651	15	923	35	1831
152	0.0034595	111	950	50	1789
153	0.0034327	49	790	65	1531
154	0.002046	12	853	67	1694
155	0.0023943	4	893	66	1782
156	0.0022894	51	865	53	1679
157	0.0019361	13	829	60	1645
158	0.0018466	6	744	41	1482
159	0.0027524	18	909	55	1800
160	0.0023697	24	869	47	1714
161	0.0034834	25	775	31	1525
162	0.0035642	88	980	50	1872
163	0.0042449	71	912	42	1753
164	0.0033864	40	927	48	1814
165	0.0025843	26	824	41	1622
166	0.0033758	37	833	37	1629
167	0.0022968	29	898	51	1767
168	0.0023092	11	874	57	1737
169	0.0033378	44	940	50	1836
170	0.0023912	6	914	64	1822
171	0.0033471	74	991	51	1908
172	0.0030542	43	876	38	1709
173	0.0035574	59	883	42	1707
174	0.003343	63	1047	63	2031
175	0.0033849	58	851	52	1644
176	0.0034677	37	865	43	1693
177	0.0035264	42	938	56	1834
178	0.0034017	85	935	51	1785
179	0.0020524	7	826	45	1645
180	0.0034802	39	990	45	1941
181	0.0034921	68	930	47	1792
182	0.0035931	59	796	35	1533
183	0.0035674	73	1003	57	1933
184	0.0034962	183	929	49	1675
185	0.0022243	23	905	45	1787
186	0.0035106	27	866	39	1705
187	0.0034087	36	1005	47	1974
188	0.0022733	17	851	50	1685
189	0.0033422	66	943	58	1820
190	0.003404	46	943	51	1840
191	0.0033591	44	837	57	1630
192	0.0035118	39	929	56	1819
193	0.0026326	25	922	41	1819
194	0.0032897	88	902	67	1716
195	0.0033624	79	923	56	1767
196	0.0019706	14	895	40	1776
197	0.0033679	31	852	42	1673
198	0.0034062	35	887	51	1739
199	0.0034049	29	872	44	1715
200	0.0034984	40	914	43	1788
201	0.0034075	49	854	40	1659
202	0.0033832	95	911	39	1727
203	0.0033559	31	881	51	1731
204	0.0020339	2	942	50	1882
205	0.0033679	87	891	74	1695
206	0.0034568	77	997	53	1917
207	0.0027441	24	883	46	1742
208	0.0024882	16	866	43	1716
209	0.0035365	66	886	40	1706
210	0.0023675	21	912	41	1803
211	0.0034706	42	920	48	1798
212	0.0032824	22	961	77	1900
213	0.0020402	10	817	44	1624
214	0.0017211	1	878	49	1755
215	0.0022668	2	842	56	1682
216	0.0024298	11	910	43	1809
217	0.002363	3	855	55	1707
218	0.0034422	49	935	52	1821
219	0.0028149	30	982	67	1934
220	0.0034078	50	873	40	1696
221	0.0033974	26	860	46	1694
222	0.0035666	61	920	56	1779
223	0.0034451	108	995	52	1882
224	0.003425	55	926	53	1797
225	0.0033411	20	837	52	1654
226	0.0035733	95	909	65	1723
227	0.0033419	45	940	72	1835
228	0.0026841	3	903	53	1803
229	0.0025377	22	853	57	1684
230	0.002954	17	905	44	1793
231	0.0035852	62	951	40	1840
232	0.0021797	4	902	47	1800
233	0.0029873	12	901	60	1790
234	0.0020766	5	911	52	1817
235	0.0026564	3	920	77	1837
236	0.003463	131	971	58	1811
237	0.0031232	59	875	44	1691
238	0.0035582	34	887	37	1740
239	0.0035572	148	996	56	1844
240	0.0028579	18	850	47	1682
241	0.0033807	59	962	46	1865
242	0.0036906	84	866	58	1648
243	0.0034156	116	993	63	1870
244	0.0035647	152	968	46	1784
245	0.0035248	84	917	44	1750
246	0.003427	73	942	64	1811
247	0.0034247	55	960	43	1865
248	0.0035371	81	878	40	1675
249	0.003597	55	920	44	1785
250	0.0033517	101	936	54	1771
251	0.0033936	30	890	66	1750
252	0.0029479	28	952	51	1876
253	0.0034358	70	884	57	1698
254	0.0025352	28	837	40	1646
255	0.0044429	86	939	43	1792
256	0.0034505	72	835	48	1598
257	0.0022276	2	881	55	1760
258	0.003385	63	966	52	1869
259	0.0026209	3	909	62	1815
260	0.0024453	3	886	58	1769
261	0.0026752	23	910	50	1797
262	0.0033391	51	915	48	1779
263	0.003484	58	888	57	1718
264	0.0034144	13	908	51	1803
265	0.0026778	11	935	37	1859
266	0.0034423	16	874	55	1732
267	0.0034394	92	954	60	1816
268	0.0026479	37	914	51	1791
269	0.0033207	42	884	54	1726
270	0.0034697	80	925	38	1770
271	0.0023316	33	852	59	1671
272	0.0035452	44	834	47	1624
273	0.003484	15	918	81	1821
274	0.0026296	6	857	60	1708
275	0.0034349	64	843	39	1622
276	0.0034285	51	900	44	1749
277	0.0028984	18	826	54	1634
278	0.0033234	38	838	34	1638
279	0.0034071	46	824	73	1602
280	0.0034355	30	926	54	1822
281	0.0034497	53	901	44	1749
282	0.0028748	25	914	49	1803
283	0.0022955	3	879	54	1755
284	0.0033594	28	900	46	1772
285	0.0020523	16	855	45	1694
286	0.0025993	35	1008	76	1981
287	0.0035159	70	947	51	1824
288	0.0034422	46	825	54	1604
289	0.0028652	26	819	37	1612
290	0.0033514	106	900	44	1694
291	0.0034721	116	929	45	1742
292	0.0034214	41	940	43	1839
293	0.0033667	32	839	36	1646
294	0.0035503	151	1019	46	1887
295	0.0035379	66	876	52	1686
296	0.0020627	27	822	46	1617
297	0.0024681	37	945	70	1853
298	0.0033947	141	923	50	1705
299	0.002229	2	931	50	1860
300	0.0026492	24	939	55	1854
301	0.0034117	64	909	41	1754
302	0.0018906	17	945	43	1873
303	0.0019655	4	858	48	1712
304	0.0034356	42	840	45	1638
305	0.0023901	3	939	44	1875
306	0.002171	37	918	52	1799
307	0.0033353	29	886	62	1743
308	0.0034829	55	929	47	1803
309	0.0034473	69	976	52	1883
310	0.0034597	51	930	56	1809
311	0.0034792	52	931	42	1810
312	0.0034216	84	872	43	1660
313	0.0022594	12	885	48	1758
314	0.0021298	5	935	52	1865
315	0.003414	39	890	44	1741
316	0.0034325	100	963	50	1826
317	0.0030072	29	872	54	1715
318	0.0035638	126	920	48	1714
319	0.0033895	50	879	57	1708
320	0.0026055	11	840	56	1669
321	0.0020861	16	861	52	1706
322	0.0034708	80	939	44	1798
323	0.0025847	25	922	46	1819
324	0.0033572	59	959	39	1859
325	0.0020928	0	873	45	1746
326	0.003386	33	854	49	1675
327	0.0021095	1	834	52	1667
328	0.003441	54	888	51	1722
329	0.0033144	28	894	56	1760
330	0.0034545	66	893	47	1720
331	0.0034752	181	971	61	1761
332	0.003285	120	930	56	1740
333	0.0035181	113	974	58	1835
334	0.0034896	28	933	77	1838
335	0.0034867	69	904	42	1739
336	0.0036506	44	924	55	1804
337	0.0033798	26	951	45	1876
338	0.0034126	82	897	51	1712
339	0.0035328	133	921	58	1709
340	0.0034379	54	855	40	1656
341	0.0034075	21	902	39	1783
342	0.0034371	63	907	52	1751
343	0.003311	32	902	77	1772
344	0.0028856	3	947	64	1891
345	0.0035309	14	892	34	1770
346	0.0034364	31	881	42	1731
347	0.0034489	87	969	77	1851
348	0.0034842	88	945	45	1802
349	0.0033877	58	906	38	1754
350	0.0033969	17	838	45	1659
351	0.0035085	95	991	57	1887
352	0.0034734	195	983	58	1771
353	0.0022688	6	869	46	1732
354	0.0019874	5	876	58	1747
355	0.002344	15	808	54	1601
356	0.0024497	40	892	45	1744
357	0.0032792	42	859	46	1676
358	0.0023669	12	832	48	1652
359	0.0034254	20	994	57	1968
360	0.0024684	16	963	50	1910
361	0.0026933	48	950	53	1852
362	0.0032979	90	1013	65	1936
363	0.0030295	23	866	53	1709
364	0.0035149	60	904	53	1748
365	0.0034243	78	851	42	1624
366	0.0019867	7	846	60	1685
367	0.0034618	12	955	82	1898
368	0.0028245	7	869	50	1731
369	0.0039604	50	916	58	1782
370	0.0035333	32	901	42	1770
371	0.0023828	20	900	54	1780
372	0.0033918	96	1003	54	1910
373	0.0034025	45	882	37	1719
374	0.0036384	31	946	38	1861
375	0.0033585	22	856	44	1690
376	0.003408	47	881	56	1715
377	0.0034602	85	892	41	1699
378	0.0034798	59	931	50	1803
379	0.0035586	67	935	58	1803
380	0.0035049	46	904	53	1762
381	0.0034585	85	977	69	1869
382	0.0033878	61	890	46	1719
383	0.003441	63	875	42	1687
384	0.0026299	13	966	76	1919
385	0.0032768	70	1021	61	1972
386	0.002085	23	894	55	1765
387	0.0033756	59	876	48	1693
388	0.0026287	14	918	61	1822
389	0.0026382	22	847	41	1672
390	0.0035198	78	970	74	1862
391	0.0018096	24	881	53	1738
392	0.0032279	35	948	57	1861
393	0.0034724	29	875	43	1721
394	0.0019288	19	901	48	1783
395	0.0034108	109	947	37	1785
396	0.0033923	32	903	42	1774
397	0.0035512	98	994	61	1890
398	0.0032897	28	957	45	1886
399	0.0032969	33	948	54	1863
400	0.0035221	71	941	80	1811
401	0.0034109	151	947	62	1743
402	0.0039407	50	926	48	1802
403	0.0025111	23	909	42	1795
404	0.003318	96	1026	53	1956
405	0.0033721	33	825	48	1617
406	0.0030851	13	893	49	1773
407	0.0034432	134	957	47	1780
408	0.0034813	46	920	52	1794
409	0.0035002	51	1004	52	1957
410	0.0033374	10	852	61	1694
411	0.0036816	43	884	65	1725
412	0.0034997	106	954	56	1802
413	0.0034261	32	962	57	1892
414	0.0034649	33	892	49	1751
415	0.0034418	40	835	48	1630
416	0.0034141	38	875	36	1712
417	0.0033619	40	914	46	1788
418	0.0027334	20	874	52	1728
419	0.0032658	43	809	49	1575
420	0.0034569	31	916	47	1801
421	0.0033797	45	921	53	1797
422	0.0034839	110	983	55	1856
423	0.0034105	51	968	67	1885
424	0.0026747	11	868	39	1725
425	0.0035742	55	948	51	1841
426	0.0022254	3	882	49	1761
427	0.0034752	39	931	48	1823
428	0.0034396	34	915	46	1796
429	0.0035064	40	901	53	1762
430	0.0033257	100	963	44	1826
431	0.0033646	153	948	76	1743
432	0.0033244	26	848	36	1670
433	0.0034833	38	932	55	1826
434	0.0034446	53	975	54	1897
435	0.0033613	36	934	61	1832
436	0.0024574	21	984	49	1947
437	0.0033339	116	967	49	1818
438	0.0033626	29	940	49	1851
439	0.0027233	25	968	66	1911
440	0.0025026	8	918	53	1828
441	0.0035039	21	866	72	1711
442	0.0034122	112	877	50	1642
443	0.0033116	168	1024	67	1880
444	0.0036525	129	864	49	1599
445	0.00206	19	811	61	1603
446	0.0036531	21	902	52	1783
447	0.0024209	20	877	32	1734
448	0.0020111	1	918	45	1835
449	0.0034026	37	850	38	1663
450	0.0033969	36	853	43	1670
451	0.0034124	36	944	70	1852
452	0.0022951	21	870	57	1719
453	0.0026969	13	908	43	1803
454	0.0034443	33	893	62	1753
455	0.0028133	2	941	57	1880
456	0.0035423	64	940	62	1816
457	0.0032845	41	900	52	1759
458	0.0021805	8	923	49	1838
459	0.0035716	15	1011	54	2007
460	0.0035073	146	989	54	1832
461	0.0036415	37	879	39	1721
462	0.0035537	162	936	47	1710
463	0.0035528	54	847	41	1640
464	0.0033655	72	921	51	1770
465	0.0035086	98	993	43	1888
466	0.0024281	30	837	52	1644
467	0.0034303	28	864	42	1700
468	0.00333	131	1009	47	1887
469	0.0035453	134	971	63	1808
470	0.0035803	102	824	40	1546
471	0.0022661	26	874	45	1722
472	0.0034076	21	944	60	1867
473	0.0034449	94	964	46	1834
474	0.0033897	39	876	36	1713
475	0.0033465	50	919	44	1788
476	0.0033507	138	969	59	1800
477	0.003334	47	877	58	1707
478	0.0034446	92	1009	68	1926
479	0.0035303	37	911	59	1785
480	0.0035031	65	951	40	1837
481	0.0036985	86	1012	51	1938
482	0.003339	124	1011	53	1898
483	0.0019256	5	889	51	1773
484	0.003381	30	910	43	1790
485	0.0019419	4	860	58	1716
486	0.0035227	73	925	58	1777
487	0.0021765	5	942	60	1879
488	0.0033734	21	957	72	1893
489	0.0033921	35	993	50	1951
490	0.0035072	64	935	74	1806
491	0.0026327	16	863	57	1710
492	0.0034228	71	905	45	1739
493	0.0022156	16	896	41	1776
494	0.0033431	127	877	66	1627
495	0.0033752	17	956	56	1895
496	0.0034677	128	1002	42	1876
497	0.0020172	4	960	44	1916
498	0.0035618	153	961	43	1769
499	0.0036033	53	884	47	1715
500	0.0033887	24	871	51	1718
501	0.0035323	23	908	77	1793
502	0.0028253	3	887	53	1771
503	0.0033362	51	948	62	1845
504	0.0018475	19	809	45	1599
505	0.0033118	166	986	59	1806
506	0.0034725	84	929	52	1774
507	0.0034724	73	961	49	1849
508	0.003287	46	941	73	1836
509	0.0030129	17	954	62	1891
510	0.0022086	6	873	46	1740
511	0.0022817	7	883	47	1759
512	0.0034309	113	961	61	1809
513	0.002002	14	835	32	1656
514	0.002528	3	877	64	1751
515	0.0023957	16	968	64	1920
516	0.0028906	1	986	49	1971
517	0.0033517	40	930	57	1820
518	0.0034891	41	956	62	1871
519	0.003496	40	985	52	1930
520	0.0033612	46	868	38	1690
521	0.0034744	76	986	53	1896
522	0.0023107	3	897	60	1791
523	0.0034887	49	931	48	1813
524	0.0034125	47	943	47	1839
525	0.0018391	10	937	55	1864
526	0.0026631	22	897	56	1772
527	0.0031638	32	859	33	1686
528	0.0035245	58	879	75	1700
529	0.0035129	110	914	43	1718
530	0.0023023	9	910	69	1811
531	0.0033064	199	971	57	1743
532	0.0034485	20	856	48	1692
533	0.0022917	17	857	46	1697
534	0.0022686	21	940	38	1859
535	0.0034878	28	941	61	1854
536	0.0025354	13	875	51	1737
537	0.0034091	20	830	54	1640
538	0.0034431	24	940	60	1856
539	0.0034706	42	959	54	1876
540	0.0022074	13	910	47	1807
541	0.0033968	114	988	43	1862
542	0.0033325	70	852	37	1634
543	0.0033456	95	973	47	1851
544	0.0034159	48	863	67	1678
545	0.0034233	69	939	61	1809
546	0.003065	51	930	41	1809
547	0.0023556	47	959	42	1871
548	0.0034662	83	1056	54	2029
549	0.0035562	28	912	46	1796
550	0.003001	20	884	57	1748
551	0.0019002	20	929	63	1838
552	0.0033	31	870	49	1709
553	0.0033567	114	905	40	1696
554	0.0033555	26	951	64	1876
555	0.0033779	56	943	45	1830
556	0.0026941	44	834	41	1624
557	0.0020928	22	823	52	1624
558	0.0033941	40	932	42	1824
559	0.0034558	97	937	51	1777
560	0.0034519	88	887	60	1686
561	0.0024318	0	932	48	1864
562	0.0033644	50	922	49	1794
563	0.0020491	16	874	44	1732
564	0.0035187	98	1019	77	1940
565	0.0022262	15	856	44	1697
566	0.003358	43	916	60	1789
567	0.00361	46	967	47	1888
568	0.0033379	150	1019	50	1888
569	0.002186	13	890	49	1767
570	0.0033416	61	980	47	1899
571	0.0028108	28	894	45	1760
572	0.0034219	128	963	63	1798
573	0.0024499	23	899	60	1775
574	0.0019404	9	794	52	1579
575	0.0033461	59	912	43	1765
576	0.0033428	31	865	40	1699
577	0.003506	100	853	43	1606
578	0.0029092	12	896	53	1780
579	0.0035027	55	887	56	1719
580	0.0033329	72	921	62	1770
581	0.0033817	48	896	45	1744
582	0.0035405	52	956	57	1860
583	0.0034166	159	984	39	1809
584	0.0033132	28	879	53	1730
585	0.003421	67	811	44	1555
586	0.0034699	27	879	40	1731
587	0.0034863	31	929	53	1827
588	0.0033773	81	1040	53	1999
589	0.0019865	85	930	56	1775
590	0.0022479	12	918	52	1824
591	0.0033723	46	924	51	1802
592	0.0035234	32	895	44	1758
593	0.0034484	39	863	46	1687
594	0.0033526	138	1008	53	1878
595	0.0034328	90	947	61	1804
596	0.0033678	37	853	49	1669
597	0.0021794	12	782	45	1552
598	0.0035204	55	929	45	1803
599	0.0029936	9	833	58	1657
600	0.0033394	55	940	42	1825
601	0.0034705	33	899	39	1765
602	0.0020928	77	916	58	1755
603	0.0028855	11	930	73	1849
604	0.00279	24	890	64	1756
605	0.0034781	94	875	50	1656
606	0.0034332	31	851	55	1671
607	0.0029171	23	911	67	1799
608	0.0021388	21	855	45	1689
609	0.0030063	14	950	46	1886
610	0.0023692	20	938	45	1856
611	0.0023596	22	910	38	1798
612	0.0034444	36	846	75	1656
613	0.0034171	87	990	69	1893
614	0.0026778	14	870	50	1726
615	0.0035059	94	972	61	1850
616	0.0034157	36	885	48	1734
617	0.003564	31	903	40	1775
618	0.0020926	14	867	42	1720
619	0.0021279	13	888	46	1763
620	0.0017542	5	774	41	1543
621	0.0018612	12	845	66	1678
622	0.0034415	50	991	46	1932
623	0.0033054	29	931	68	1833
624	0.0033406	23	874	61	1725
625	0.0025678	9	839	42	1669
626	0.0033277	30	886	70	1742
627	0.0025656	2	838	66	1674
628	0.0035178	33	911	48	1789
629	0.0026379	6	907	45	1808
630	0.0034346	48	865	64	1682
631	0.0027891	62	879	79	1696
632	0.0034159	38	977	45	1916
633	0.003411	109	1033	47	1957
634	0.0020168	5	893	39	1781
635	0.0033084	27	839	50	1651
636	0.003512	114	926	71	1738
637	0.0023208	12	874	73	1736
638	0.0033905	41	887	66	1733
639	0.003419	71	873	49	1675
640	0.0033427	36	907	44	1778
641	0.003484	57	980	57	1903
642	0.0034218	54	925	64	1796
643	0.0033672	113	997	79	1881
644	0.0035252	97	929	55	1761
645	0.0023295	4	919	50	1834
646	0.0035424	93	937	55	1781
647	0.0033458	81	983	50	1885
648	0.0031171	25	952	60	1879
649	0.0034276	38	894	52	1750
650	0.0034526	40	915	48	1790
651	0.00334	25	902	48	1779
652	0.0025022	17	883	51	1749
653	0.0034309	57	834	49	1611
654	0.0035585	31	931	48	1831
655	0.0033434	122	1002	57	1882
656	0.0034897	72	957	58	1842
657	0.0021228	1	807	84	1613
658	0.0032683	99	936	59	1773
659	0.0033996	97	936	56	1775
660	0.0033456	136	926	76	1716
661	0.0032102	13	889	50	1765
662	0.0020941	1	839	40	1677
663	0.0034192	32	849	52	1666
664	0.0033863	49	871	59	1693
665	0.0020321	0	852	56	1704
666	0.0034812	57	941	49	1825
667	0.0035223	161	913	75	1665
668	0.0033845	40	928	47	1816
669	0.0034623	59	939	57	1819
670	0.0033698	34	916	64	1798
671	0.0033046	57	895	57	1733
672	0.0034421	17	909	38	1801
673	0.0029446	24	879	44	1734
674	0.0032865	51	861	53	1671
675	0.0034292	56	898	58	1740
676	0.0034147	64	926	41	1788
677	0.0034438	44	905	49	1766
678	0.0026844	25	922	41	1819
679	0.0021693	21	865	40	1709
680	0.0034506	71	925	55	1779
681	0.0026344	3	940	53	1877
682	0.0033593	69	913	62	1757
683	0.0033264	28	924	40	1820
684	0.0035011	69	895	56	1721
685	0.0034882	75	832	38	1589
686	0.0035213	42	926	78	1810
687	0.0034062	106	946	37	1786
688	0.0032685	70	937	61	1804
689	0.0029465	75	964	79	1853
690	0.0025897	23	892	66	1761
691	0.0025576	13	841	43	1669
692	0.0019141	21	839	47	1657
693	0.0033166	55	896	42	1737
694	0.0033017	72	923	52	1774
695	0.0025774	29	836	50	1643
696	0.0034706	55	905	39	1755
697	0.0034813	102	941	48	1780
698	0.0025563	22	958	49	1894
699	0.0035104	67	965	50	1863
700	0.0033151	32	937	77	1842
701	0.0035968	33	881	55	1729
702	0.0032921	66	919	47	1772
703	0.0036288	161	1007	66	1853
704	0.0021124	11	860	43	1709
705	0.0034309	39	998	45	1957
706	0.0022238	21	929	48	1837
707	0.0034563	70	861	53	1652
708	0.0033789	37	948	50	1859
709	0.0034059	87	920	58	1753
710	0.0034963	59	899	39	1739
711	0.0034071	88	957	49	1826
712	0.0033737	20	928	45	1836
713	0.0033669	58	948	76	1838
714	0.0034447	43	985	48	1927
715	0.0034231	59	894	39	1729
716	0.0034421	61	912	53	1763
717	0.0020741	37	899	51	1761
718	0.0034817	20	812	49	1604
719	0.0034088	25	931	49	1837
720	0.0033669	34	898	45	1762
721	0.0033876	115	958	53	1801
722	0.0034627	112	969	53	1826
723	0.003476	147	961	45	1775
724	0.0034615	52	921	39	1790
725	0.0028113	35	922	51	1809
726	0.0034325	142	942	48	1742
727	0.0025343	24	857	48	1690
728	0.0033386	81	929	67	1777
729	0.0034942	72	944	50	1816
730	0.0032582	57	932	54	1807
731	0.0033123	103	1026	93	1949
732	0.0026548	28	849	39	1670
733	0.0034506	30	967	38	1904
734	0.0027102	10	867	46	1724
735	0.0034318	30	956	45	1882
736	0.0035445	23	973	45	1923
737	0.0034477	45	870	44	1695
738	0.0021525	4	816	36	1628
739	0.0024098	8	975	49	1942
740	0.0034409	43	1055	64	2067
741	0.0023594	27	941	52	1855
742	0.003396	68	887	43	1706
743	0.0034892	22	939	42	1856
744	0.0034436	65	879	43	1693
745	0.0033828	11	908	51	1805
746	0.0035506	47	852	50	1657
747	0.0034943	161	919	59	1677
748	0.0034492	123	953	47	1783
749	0.0033303	56	902	56	1748
750	0.0034331	36	919	44	1802
751	0.0033811	42	1012	60	1982
752	0.0022021	0	869	42	1738
753	0.0034178	28	901	52	1774
754	0.00353	22	950	42	1878
755	0.0033996	43	949	49	1855
756	0.0034408	80	926	56	1772
757	0.0033266	40	952	93	1864
758	0.0034321	79	863	43	1647
759	0.0033894	59	914	47	1769
760	0.0036315	85	915	70	1745
761	0.0029357	23	910	64	1797
762	0.0025145	11	924	64	1837
763	0.003328	91	981	50	1871
764	0.0033117	127	990	53	1853
765	0.0022897	6	878	57	1750
766	0.0026491	12	854	39	1696
767	0.0034648	29	949	58	1869
768	0.0024018	7	937	56	1867
769	0.0020197	12	929	58	1846
770	0.0033102	43	864	54	1685
771	0.0032784	33	830	36	1627
772	0.003596	47	870	42	1693
773	0.0035079	116	915	40	1714
774	0.0033649	80	855	65	1630
775	0.0034552	17	925	47	1833
776	0.0023281	18	946	54	1874
777	0.0033355	36	911	66	1786
778	0.0035113	108	898	60	1688
779	0.0027079	14	909	55	1804
780	0.0026701	0	920	70	1840
781	0.0028202	1	859	38	1717
782	0.0033952	128	897	36	1666
783	0.0034397	53	909	52	1765
784	0.0026499	10	855	38	1700
785	0.0034168	32	953	61	1874
786	0.0034657	51	898	48	1745
787	0.0033593	73	927	48	1781
788	0.0034433	57	910	51	1763
789	0.0034413	68	983	57	1898
790	0.0024673	3	835	46	1667
791	0.0034538	229	1040	76	1851
792	0.0019773	6	832	41	1658
793	0.0021176	3	837	57	1671
794	0.0026037	1	858	55	1715
795	0.0034915	52	918	54	1784
796	0.0034834	228	1007	59	1786
797	0.00437	42	849	49	1656
798	0.003317	93	919	61	1745
799	0.0035325	83	874	49	1665
800	0.0032616	84	941	58	1798
801	0.0033734	30	901	70	1772
802	0.0034704	102	884	46	1666
803	0.002577	13	858	52	1703
804	0.0034491	19	857	53	1695
805	0.0034293	38	878	47	1718
806	0.0034722	58	978	45	1898
807	0.0034843	81	985	62	1889
808	0.003525	63	899	39	1735
809	0.0016958	10	886	57	1762
810	0.0028909	14	928	65	1842
811	0.0034056	61	972	44	1883
812	0.0034451	105	899	38	1693
813	0.0018666	31	875	42	1719
814	0.0034602	74	926	43	1778
815	0.0034269	65	960	53	1855
816	0.0034322	40	883	62	1726
817	0.0020382	10	806	43	1602
818	0.0034113	85	938	54	1791
819	0.0033508	66	849	43	1632
820	0.0033561	165	915	37	1665
821	0.0027922	25	940	41	1855
822	0.0036068	39	860	42	1681
823	0.0033832	67	914	55	1761
824	0.0034872	45	949	50	1853
825	0.0035094	25	839	60	1653
826	0.0022196	12	856	33	1700
827	0.0024486	13	864	51	1715
828	0.0025214	18	884	67	1750
829	0.003486	39	882	62	1725
830	0.0035426	30	963	58	1896
831	0.0034975	42	924	54	1806
832	0.0033486	50	932	61	1814
833	0.0027173	16	938	63	1860
834	0.0020962	27	903	64	1779
835	0.0034843	65	948	53	1831
836	0.0033302	34	849	50	1664
837	0.0022788	22	962	43	1902
838	0.0033793	41	935	47	1829
839	0.0034863	75	966	64	1857
840	0.0034182	44	918	48	1792
841	0.003432	37	882	51	1727
842	0.0035367	57	962	57	1867
843	0.0026904	16	853	41	1690
844	0.0035385	30	947	61	1864
845	0.0034085	85	882	35	1679
846	0.0024051	23	905	42	1787
847	0.0033976	44	970	43	1896
848	0.0039901	77	906	83	1735
849	0.0033775	149	947	41	1745
850	0.0034462	81	950	56	1819
851	0.0034085	111	861	54	1611
852	0.0034103	42	911	45	1780
853	0.0034181	101	846	36	1591
854	0.0034936	44	893	66	1742
855	0.0033118	81	880	47	1679
856	0.0034416	113	971	73	1829
857	0.0034382	36	931	45	1826
858	0.0033433	33	876	64	1719
859	0.0020205	32	868	63	1704
860	0.0025394	15	887	49	1759
861	0.001961	7	880	41	1753
862	0.0034844	72	853	48	1634
863	0.0018861	21	831	44	1641
864	0.003363	69	926	94	1783
865	0.0028633	34	910	42	1786
866	0.0033245	64	957	42	1850
867	0.0034321	92	981	44	1870
868	0.0033924	21	950	50	1879
869	0.0033897	104	915	67	1726
870	0.0034853	120	961	45	1802
871	0.0033022	118	947	46	1776
872	0.0023783	32	901	45	1770
873	0.002271	17	955	64	1893
874	0.0033906	117	1008	47	1899
875	0.0036517	47	903	52	1759
876	0.0033556	62	903	37	1744
877	0.0033064	76	903	38	1730
878	0.0032991	41	941	51	1841
879	0.0035866	157	948	72	1739
880	0.0035451	37	921	47	1805
881	0.0024705	7	837	47	1667
882	0.0025562	12	973	73	1934
883	0.0020051	2	969	46	1936
884	0.0036007	37	933	48	1829
885	0.0035847	67	964	55	1861
886	0.0035071	64	894	60	1724
887	0.0034061	49	857	60	1665
888	0.0021886	35	912	60	1789
889	0.0024381	22	880	41	1738
890	0.0032197	4	907	60	1810
891	0.003438	36	923	51	1810
892	0.0034942	115	988	43	1861
893	0.0029745	17	868	48	1719
894	0.0033141	34	907	53	1780
895	0.0023286	1	938	54	1875
896	0.0020549	36	857	46	1678
897	0.0023962	24	932	42	1840
898	0.0033973	72	967	59	1862
899	0.0024065	16	937	56	1858
900	0.002145	16	942	59	1868
901	0.0034118	220	973	36	1726
902	0.0033872	54	901	57	1748
903	0.0026578	23	800	43	1577
904	0.0032334	33	863	55	1693
905	0.0020789	14	848	62	1682
906	0.0033375	53	892	51	1731
907	0.0032259	87	963	50	1839
908	0.0035466	75	963	45	1851
909	0.0034496	70	963	49	1856
910	0.001953	15	800	44	1585
911	0.0035506	14	837	50	1660
912	0.0034295	49	875	41	1701
913	0.0023302	13	908	97	1803
914	0.0034698	99	926	43	1753
915	0.0033683	87	883	67	1679
916	0.0028785	1	933	58	1865
917	0.0023261	5	902	40	1799
918	0.0034871	42	872	48	1702
919	0.0034328	108	931	64	1754
920	0.0020756	17	890	82	1763
921	0.0024143	18	850	48	1682
922	0.0027593	2	965	55	1928
923	0.003408	116	990	57	1864
924	0.0034016	203	1085	65	1967
925	0.0034784	74	958	59	1842
926	0.0034204	151	934	51	1717
927	0.0039773	18	823	37	1628
928	0.003215	51	913	55	1775
929	0.0017888	19	851	54	1683
930	0.0034047	62	1030	47	1998
931	0.0029567	23	908	58	1793
932	0.0032844	38	931	54	1824
933	0.0033151	98	993	48	1888
934	0.00342	13	885	43	1757
935	0.00219	6	885	43	1764
936	0.0033467	46	880	48	1714
937	0.0021807	5	893	53	1781
938	0.0033831	100	955	57	1810
939	0.0021859	15	913	63	1811
940	0.0024316	15	887	45	1759
941	0.0033064	29	880	60	1731
942	0.0034663	27	965	43	1903
943	0.0019285	36	865	40	1694
944	0.0025292	2	852	50	1702
945	0.0033055	18	947	56	1876
946	0.0027857	8	873	46	1738
947	0.0023683	29	923	60	1817
948	0.0020968	8	931	46	1854
949	0.0034763	52	856	44	1660
950	0.0030445	42	978	65	1914
951	0.0035507	84	1004	68	1924
952	0.0019541	10	870	43	1730
953	0.0019956	3	831	39	1659
954	0.0025461	6	938	50	1870
955	0.0022588	21	921	70	1821
956	0.0021406	6	882	66	1758
957	0.0028704	6	872	84	1738
958	0.003473	70	903	51	1736
959	0.0033179	120	965	39	1810
960	0.0034238	94	923	42	1752
961	0.0036136	46	870	52	1694
962	0.0034296	50	975	59	1900
963	0.0024527	34	949	48	1864
964	0.0027777	36	918	84	1800
965	0.0033683	38	906	57	1774
966	0.0033597	125	954	63	1783
967	0.003491	94	1046	48	1998
968	0.0033037	88	933	56	1778
969	0.0031715	31	900	48	1769
970	0.0033904	27	850	62	1673
971	0.0023865	23	932	48	1841
972	0.0034026	20	868	42	1716
973	0.0032835	36	818	51	1600
974	0.0023773	15	888	59	1761
975	0.0034763	25	906	43	1787
976	0.0029446	23	874	61	1725
977	0.0033666	16	933	49	1850
978	0.0034258	94	936	45	1778
979	0.0023855	32	926	42	1820
980	0.0035254	65	922	54	1779
981	0.0033947	80	935	52	1790
982	0.0033504	67	971	58	1875
983	0.0035572	45	926	40	1807
984	0.0026403	25	940	50	1855
985	0.0023794	16	943	53	1870
986	0.0035221	59	927	72	1795
987	0.0034216	103	954	58	1805
988	0.0033663	45	946	46	1847
989	0.0031705	8	849	53	1690
990	0.0034087	76	870	44	1664
991	0.0033939	50	918	40	1786
992	0.0024289	10	870	45	1730
993	0.0019265	1	892	56	1783
994	0.0035348	111	945	51	1779
995	0.003556	43	888	35	1733
996	0.0020455	0	873	52	1746
997	0.0033932	34	902	50	1770
998	0.0033993	44	829	33	1614
999	0.0023101	24	842	57	1660
mean	0.00310375	49.414	910.472	51.997	1771.53

## Sheet: PowerBalance_Bal
	time	SEq	Bal	Reg	Egal
0	0.0034158	231	919	48	1607
1	0.0035051	101	906	60	1711
2	0.002153	15	902	41	1789
3	0.0024766	20	889	55	1758
4	0.0034878	132	966	59	1800
5	0.0026629	10	878	55	1746
6	0.0035969	106	909	61	1712
7	0.0022586	20	884	46	1748
8	0.0035515	42	891	51	1740
9	0.0017559	2	837	35	1672
10	0.0033445	28	887	51	1746
11	0.0027323	4	903	50	1802
12	0.0033715	56	825	45	1594
13	0.0033277	24	870	50	1716
14	0.0033923	40	863	46	1686
15	0.0021097	6	979	63	1952
16	0.0034311	28	907	54	1786
17	0.0035345	37	873	69	1709
18	0.0034487	27	970	52	1913
19	0.0027494	20	910	59	1800
20	0.0033826	63	865	68	1667
21	0.0035117	47	928	49	1809
22	0.0034538	103	935	50	1767
23	0.0025895	3	899	54	1795
24	0.0023627	1	909	42	1817
25	0.0020934	13	852	56	1691
26	0.0035828	30	877	46	1724
27	0.0033309	36	904	50	1772
28	0.0034773	56	887	48	1718
29	0.0034986	52	935	42	1818
30	0.0034855	77	899	50	1721
31	0.0034072	83	890	51	1697
32	0.0033583	40	874	46	1708
33	0.0035443	116	957	63	1798
34	0.0018004	9	824	55	1639
35	0.003496	34	875	46	1716
36	0.0034689	34	893	61	1752
37	0.0018739	5	881	44	1757
38	0.0034419	45	894	61	1743
39	0.0032905	17	926	41	1835
40	0.002153	4	891	60	1778
41	0.0019759	0	811	52	1622
42	0.0021968	14	869	43	1724
43	0.0033326	20	979	54	1938
44	0.0033095	262	997	47	1732
45	0.0034068	23	866	49	1709
46	0.0021744	0	844	50	1688
47	0.0033479	86	1010	63	1934
48	0.0034914	74	838	33	1602
49	0.0023227	33	807	70	1581
50	0.0032758	80	849	71	1618
51	0.0034315	149	992	58	1835
52	0.0034395	124	910	61	1696
53	0.0033508	41	832	40	1623
54	0.0033238	41	872	57	1703
55	0.0033982	46	891	53	1736
56	0.003593	71	879	38	1687
57	0.0035848	121	993	61	1865
58	0.0033748	17	935	46	1853
59	0.0042479	50	907	46	1764
60	0.0033626	86	949	44	1812
61	0.003349	51	877	35	1703
62	0.0033904	18	937	47	1856
63	0.003524	40	863	66	1686
64	0.0034194	106	934	53	1762
65	0.0021757	49	880	97	1711
66	0.0026061	20	845	44	1670
67	0.003394	112	952	78	1792
68	0.0026322	62	900	64	1738
69	0.0034807	85	981	48	1877
70	0.0033665	44	932	91	1820
71	0.0028982	1	850	47	1699
72	0.0019102	6	875	46	1744
73	0.0018345	11	919	41	1827
74	0.0032987	128	935	46	1742
75	0.0028498	15	866	43	1717
76	0.0035038	52	965	39	1878
77	0.0033868	60	958	56	1856
78	0.0034358	54	960	63	1866
79	0.0034226	18	862	51	1706
80	0.0023435	13	914	45	1815
81	0.0022087	21	908	49	1795
82	0.003538	65	971	44	1877
83	0.0025068	5	946	62	1887
84	0.0033787	44	883	43	1722
85	0.0034713	92	952	55	1812
86	0.0026064	26	906	42	1786
87	0.0033666	73	863	38	1653
88	0.0034196	153	962	51	1771
89	0.0030172	3	902	64	1801
90	0.0034619	36	895	48	1754
91	0.0029078	20	974	50	1928
92	0.0034687	84	944	51	1804
93	0.0033337	50	836	45	1622
94	0.0019012	8	852	50	1696
95	0.0033602	26	900	57	1774
96	0.0035124	117	887	62	1657
97	0.0034593	45	845	42	1645
98	0.0035593	41	968	58	1895
99	0.0034838	35	870	49	1705
100	0.0032323	6	876	42	1746
101	0.0022241	5	812	43	1619
102	0.0033579	50	906	66	1762
103	0.0034625	13	1005	57	1997
104	0.0033609	46	908	45	1770
105	0.0032968	111	938	53	1765
106	0.0035313	130	905	53	1680
107	0.0035657	68	924	76	1780
108	0.0033287	74	932	40	1790
109	0.0028413	40	907	64	1774
110	0.0029615	11	902	53	1793
111	0.0034108	18	886	56	1754
112	0.0033793	84	923	62	1762
113	0.0036524	52	809	44	1566
114	0.00341	50	908	52	1766
115	0.0034944	66	928	49	1790
116	0.0034332	22	945	60	1868
117	0.0034715	49	823	36	1597
118	0.0023006	4	854	67	1704
119	0.0023247	29	871	54	1713
120	0.0034037	110	925	71	1740
121	0.0034289	58	929	55	1800
122	0.003385	66	856	42	1646
123	0.0022816	19	823	48	1627
124	0.0033678	67	920	59	1773
125	0.0033653	29	939	39	1849
126	0.0036584	29	930	48	1831
127	0.0034127	25	836	33	1647
128	0.0023967	12	881	63	1750
129	0.0034213	69	945	40	1821
130	0.0033935	217	979	50	1741
131	0.0035621	98	891	38	1684
132	0.0033835	116	939	49	1762
133	0.0031059	9	894	65	1779
134	0.0036823	23	892	44	1761
135	0.003525	88	1021	76	1954
136	0.0033069	92	909	43	1726
137	0.0036074	83	922	43	1761
138	0.0023236	25	918	51	1811
139	0.0034166	77	937	45	1797
140	0.0025686	30	908	41	1786
141	0.0033806	83	863	53	1643
142	0.0034498	43	952	45	1861
143	0.0035193	54	903	47	1752
144	0.0027215	15	894	39	1773
145	0.0033715	33	924	70	1815
146	0.003107	53	880	58	1707
147	0.0024038	4	970	79	1936
148	0.0035255	181	980	52	1779
149	0.0034699	77	996	38	1915
150	0.0034435	52	893	64	1734
151	0.0024046	15	923	35	1831
152	0.0033495	111	950	50	1789
153	0.0033699	49	790	65	1531
154	0.0021337	12	853	67	1694
155	0.0022868	4	893	66	1782
156	0.002224	51	865	53	1679
157	0.0025568	13	829	60	1645
158	0.0018906	6	744	41	1482
159	0.0027418	18	909	55	1800
160	0.0023716	24	869	47	1714
161	0.0033701	25	775	31	1525
162	0.0033659	88	980	50	1872
163	0.0036287	71	912	42	1753
164	0.0033639	40	927	48	1814
165	0.0023534	26	824	41	1622
166	0.0038149	37	833	37	1629
167	0.0023913	29	898	51	1767
168	0.0022708	11	874	57	1737
169	0.0034147	44	940	50	1836
170	0.0022878	6	914	64	1822
171	0.0032929	74	991	51	1908
172	0.0030727	43	876	38	1709
173	0.0034448	59	883	42	1707
174	0.0034216	63	1047	63	2031
175	0.0034144	58	851	52	1644
176	0.0035167	37	865	43	1693
177	0.0035956	42	938	56	1834
178	0.003435	85	935	51	1785
179	0.0018975	7	826	45	1645
180	0.0034505	54	983	45	1912
181	0.0034862	68	930	47	1792
182	0.0034895	59	796	35	1533
183	0.0034317	73	1003	57	1933
184	0.0034924	183	929	49	1675
185	0.0022368	23	905	45	1787
186	0.0033513	27	866	39	1705
187	0.0034295	36	1005	47	1974
188	0.0022909	17	851	50	1685
189	0.0034572	66	943	58	1820
190	0.0034153	97	924	41	1751
191	0.003358	44	837	57	1630
192	0.0033258	39	929	56	1819
193	0.0026489	25	922	41	1819
194	0.0033673	129	890	48	1651
195	0.0033717	79	923	56	1767
196	0.0020551	14	895	40	1776
197	0.003376	31	852	42	1673
198	0.0034095	35	887	51	1739
199	0.003378	29	872	44	1715
200	0.0034475	53	912	39	1771
201	0.0034765	49	854	40	1659
202	0.0035448	95	911	39	1727
203	0.0032995	31	881	51	1731
204	0.0019489	2	942	50	1882
205	0.0039477	87	891	74	1695
206	0.0034301	77	997	53	1917
207	0.0026763	24	883	46	1742
208	0.0024868	16	866	43	1716
209	0.003391	66	886	40	1706
210	0.0023416	21	912	41	1803
211	0.003471	42	920	48	1798
212	0.0034295	22	961	77	1900
213	0.0020926	10	817	44	1624
214	0.0017711	1	878	49	1755
215	0.00231	2	842	56	1682
216	0.0020744	11	910	43	1809
217	0.0022072	3	855	55	1707
218	0.0033779	49	935	52	1821
219	0.0027175	30	982	67	1934
220	0.003403	50	873	40	1696
221	0.0033992	26	860	46	1694
222	0.0036192	61	920	56	1779
223	0.003571	108	995	52	1882
224	0.0034221	55	926	53	1797
225	0.0033238	20	837	52	1654
226	0.0034655	95	909	65	1723
227	0.0035337	45	940	72	1835
228	0.0027421	3	903	53	1803
229	0.00256	22	853	57	1684
230	0.0027297	17	905	44	1793
231	0.0035378	62	951	40	1840
232	0.0022057	4	902	47	1800
233	0.0030446	12	901	60	1790
234	0.0019437	5	911	52	1817
235	0.0026947	3	920	77	1837
236	0.0034653	143	969	60	1795
237	0.0030887	59	875	44	1691
238	0.0035023	34	887	37	1740
239	0.0036401	148	996	56	1844
240	0.0026637	18	850	47	1682
241	0.0033488	75	939	44	1803
242	0.0034516	84	866	58	1648
243	0.0034725	116	993	63	1870
244	0.0035012	152	968	46	1784
245	0.0035252	84	917	44	1750
246	0.0034231	73	942	64	1811
247	0.0035593	55	960	43	1865
248	0.0036176	81	878	40	1675
249	0.0034201	55	920	44	1785
250	0.0034623	101	936	54	1771
251	0.003321	30	890	66	1750
252	0.002992	28	952	51	1876
253	0.0034339	141	877	54	1613
254	0.0023446	28	837	40	1646
255	0.0033243	86	939	43	1792
256	0.0035134	72	821	52	1570
257	0.0024436	2	881	55	1760
258	0.0033598	63	966	52	1869
259	0.0026089	3	909	62	1815
260	0.0025091	3	886	58	1769
261	0.0025424	23	910	50	1797
262	0.0035364	51	915	48	1779
263	0.0035178	58	888	57	1718
264	0.0034876	13	908	51	1803
265	0.0027919	11	935	37	1859
266	0.0034434	16	874	55	1732
267	0.0034075	92	954	60	1816
268	0.0026775	37	914	51	1791
269	0.0034718	42	884	54	1726
270	0.0034146	80	925	38	1770
271	0.0021309	33	852	59	1671
272	0.0035597	44	834	47	1624
273	0.003368	46	906	81	1766
274	0.0026348	6	857	60	1708
275	0.0034796	64	843	39	1622
276	0.0035571	51	900	44	1749
277	0.0028901	18	826	54	1634
278	0.0033531	38	838	34	1638
279	0.0034287	46	824	73	1602
280	0.0034573	30	926	54	1822
281	0.0033703	53	901	44	1749
282	0.0029914	25	914	49	1803
283	0.0023366	3	879	54	1755
284	0.003343	36	892	46	1748
285	0.0020271	16	855	45	1694
286	0.0026499	35	1008	76	1981
287	0.0034233	70	947	51	1824
288	0.0034404	46	825	54	1604
289	0.002876	26	819	37	1612
290	0.0033168	106	900	44	1694
291	0.0034631	116	929	45	1742
292	0.0035913	41	940	43	1839
293	0.0034267	32	839	36	1646
294	0.003384	151	1019	46	1887
295	0.0038135	66	876	52	1686
296	0.002282	1	807	46	1613
297	0.002449	37	945	70	1853
298	0.0033067	141	923	50	1705
299	0.0023382	2	931	50	1860
300	0.0025788	24	939	55	1854
301	0.0033417	64	909	41	1754
302	0.0019632	17	945	43	1873
303	0.0020818	4	858	48	1712
304	0.0034563	42	840	45	1638
305	0.0026219	3	939	44	1875
306	0.0030153	37	918	52	1799
307	0.0033953	29	886	62	1743
308	0.0033901	83	906	47	1729
309	0.003422	69	976	52	1883
310	0.0034826	51	930	56	1809
311	0.0034753	52	931	42	1810
312	0.0033416	96	865	45	1634
313	0.0022127	12	885	48	1758
314	0.002128	5	935	52	1865
315	0.0034978	47	889	44	1731
316	0.0035253	100	963	50	1826
317	0.003105	29	872	54	1715
318	0.0033973	126	920	48	1714
319	0.0033619	50	879	57	1708
320	0.0026656	11	840	56	1669
321	0.0020762	16	861	52	1706
322	0.003463	80	939	44	1798
323	0.0026384	25	922	46	1819
324	0.0033356	59	959	39	1859
325	0.0021029	0	873	45	1746
326	0.0035894	33	854	49	1675
327	0.0021882	1	834	52	1667
328	0.0035342	54	888	51	1722
329	0.0034921	28	894	56	1760
330	0.0033607	66	893	47	1720
331	0.0034696	208	958	52	1708
332	0.0034975	120	930	56	1740
333	0.0036666	113	974	58	1835
334	0.0033427	28	933	77	1838
335	0.0033268	69	904	42	1739
336	0.003554	44	924	55	1804
337	0.0033935	26	951	45	1876
338	0.003586	82	897	51	1712
339	0.0034816	133	921	58	1709
340	0.0033652	54	855	40	1656
341	0.0033961	21	902	39	1783
342	0.0035728	63	907	52	1751
343	0.0035298	32	902	77	1772
344	0.0047898	3	947	64	1891
345	0.003355	14	892	34	1770
346	0.00342	31	881	42	1731
347	0.0035651	87	969	77	1851
348	0.0034834	88	945	45	1802
349	0.0035185	58	906	38	1754
350	0.0034693	17	838	45	1659
351	0.003508	129	991	53	1853
352	0.0034028	195	983	58	1771
353	0.0021243	6	869	46	1732
354	0.0020451	5	876	58	1747
355	0.002331	15	808	54	1601
356	0.002489	40	892	45	1744
357	0.0033904	42	859	46	1676
358	0.0023322	12	832	48	1652
359	0.0033562	20	994	57	1968
360	0.0024369	16	963	50	1910
361	0.0028229	48	950	53	1852
362	0.0033828	90	1013	65	1936
363	0.0033123	148	933	50	1718
364	0.0036319	60	904	53	1748
365	0.0034713	78	851	42	1624
366	0.0020251	7	846	60	1685
367	0.003481	12	955	82	1898
368	0.0027406	7	869	50	1731
369	0.0033883	50	916	58	1782
370	0.003371	32	901	42	1770
371	0.0024328	20	900	54	1780
372	0.0034268	96	1003	54	1910
373	0.0034161	45	882	37	1719
374	0.0034878	31	946	38	1861
375	0.0033303	22	856	44	1690
376	0.0035073	102	850	55	1598
377	0.0033633	85	892	41	1699
378	0.0033886	59	931	50	1803
379	0.0033781	67	935	58	1803
380	0.0035238	46	904	53	1762
381	0.0034524	85	977	69	1869
382	0.003429	61	890	46	1719
383	0.0035391	63	875	42	1687
384	0.0027783	13	966	76	1919
385	0.0033537	70	1021	61	1972
386	0.0021616	23	894	55	1765
387	0.0034005	59	876	48	1693
388	0.0026169	14	918	61	1822
389	0.0026441	22	847	41	1672
390	0.0038806	78	970	74	1862
391	0.00189	24	881	53	1738
392	0.003328	35	948	57	1861
393	0.003565	29	875	43	1721
394	0.0020754	19	901	48	1783
395	0.0033032	109	947	37	1785
396	0.0033543	32	903	42	1774
397	0.0034066	122	988	75	1854
398	0.0033776	28	957	45	1886
399	0.0034003	33	948	54	1863
400	0.0036999	71	941	80	1811
401	0.0032859	151	947	62	1743
402	0.0033779	50	926	48	1802
403	0.0024058	23	909	42	1795
404	0.003292	96	1026	53	1956
405	0.003426	33	825	48	1617
406	0.0030818	13	893	49	1773
407	0.0035188	134	957	47	1780
408	0.0034507	46	920	52	1794
409	0.0035122	51	1004	52	1957
410	0.0033167	10	852	61	1694
411	0.0033745	43	884	65	1725
412	0.0034011	106	954	56	1802
413	0.0035992	50	957	57	1864
414	0.0033546	33	892	49	1751
415	0.0036058	40	835	48	1630
416	0.0035187	38	875	36	1712
417	0.0033889	40	914	46	1788
418	0.0026566	20	874	52	1728
419	0.0033817	43	809	49	1575
420	0.0033663	31	916	47	1801
421	0.0035098	45	921	53	1797
422	0.0035484	110	983	55	1856
423	0.0035545	51	968	67	1885
424	0.0025646	11	868	39	1725
425	0.0033976	73	931	61	1789
426	0.0022576	3	882	49	1761
427	0.0034129	39	931	48	1823
428	0.0034058	34	915	46	1796
429	0.0035295	51	898	50	1745
430	0.0034263	100	963	44	1826
431	0.0034415	170	931	41	1692
432	0.0034428	26	848	36	1670
433	0.0035285	38	932	55	1826
434	0.0035609	53	975	54	1897
435	0.0034145	36	934	61	1832
436	0.0025349	21	984	49	1947
437	0.0033956	116	967	49	1818
438	0.0032445	29	940	49	1851
439	0.0027912	25	968	66	1911
440	0.0024241	8	918	53	1828
441	0.0033429	21	866	72	1711
442	0.0033835	112	877	50	1642
443	0.0034355	211	1016	46	1821
444	0.0036666	129	864	49	1599
445	0.0021359	19	811	61	1603
446	0.0033573	21	902	52	1783
447	0.0023196	20	877	32	1734
448	0.0021163	1	918	45	1835
449	0.0033733	73	843	38	1613
450	0.0033154	36	853	43	1670
451	0.0033431	36	944	70	1852
452	0.0022123	21	870	57	1719
453	0.0027444	13	908	43	1803
454	0.0035775	33	893	62	1753
455	0.002798	2	941	57	1880
456	0.0034969	64	940	62	1816
457	0.0033057	41	900	52	1759
458	0.0022196	8	923	49	1838
459	0.0033197	15	1011	54	2007
460	0.0034631	146	989	54	1832
461	0.0035605	37	879	39	1721
462	0.0034353	162	936	47	1710
463	0.003324	54	847	41	1640
464	0.0033188	79	910	51	1741
465	0.0033991	98	993	43	1888
466	0.0032931	30	837	52	1644
467	0.0034545	41	860	42	1679
468	0.0034339	131	1009	47	1887
469	0.0034428	134	971	63	1808
470	0.0035275	102	824	40	1546
471	0.0026993	26	874	45	1722
472	0.0034008	21	944	60	1867
473	0.0034032	118	961	47	1804
474	0.0034036	39	876	36	1713
475	0.0033692	50	919	44	1788
476	0.0033764	139	932	59	1725
477	0.0034633	47	877	58	1707
478	0.0034119	92	1009	68	1926
479	0.0035557	37	911	59	1785
480	0.003406	65	951	40	1837
481	0.0034454	86	1012	51	1938
482	0.003374	124	1011	53	1898
483	0.0019155	5	889	51	1773
484	0.003521	30	910	43	1790
485	0.0019649	4	860	58	1716
486	0.0034904	73	925	58	1777
487	0.0022193	5	942	60	1879
488	0.003494	21	957	72	1893
489	0.0034235	35	993	50	1951
490	0.0035005	64	935	74	1806
491	0.0026661	16	863	57	1710
492	0.003487	82	901	45	1720
493	0.0021753	16	896	41	1776
494	0.0033579	127	877	66	1627
495	0.0034071	17	956	56	1895
496	0.0035019	128	1002	42	1876
497	0.0019868	4	960	44	1916
498	0.0035211	153	961	43	1769
499	0.0034885	53	884	47	1715
500	0.0032912	24	871	51	1718
501	0.0033983	23	908	77	1793
502	0.0029022	3	887	53	1771
503	0.0033902	51	948	62	1845
504	0.0018572	19	809	45	1599
505	0.0033219	166	986	59	1806
506	0.0034069	84	929	52	1774
507	0.0034098	73	961	49	1849
508	0.0036028	46	941	73	1836
509	0.0031164	17	954	62	1891
510	0.0020454	6	873	46	1740
511	0.0021975	7	883	47	1759
512	0.003448	113	961	61	1809
513	0.00203	14	835	32	1656
514	0.0023119	3	877	64	1751
515	0.002338	16	968	64	1920
516	0.0027174	1	986	49	1971
517	0.0034609	40	930	57	1820
518	0.0033528	41	956	62	1871
519	0.003372	40	985	52	1930
520	0.0033878	66	864	33	1662
521	0.0033724	76	986	53	1896
522	0.0024896	3	897	60	1791
523	0.0035621	49	931	48	1813
524	0.0034883	47	943	47	1839
525	0.0018112	10	937	55	1864
526	0.0026494	22	897	56	1772
527	0.002077	32	859	33	1686
528	0.0035107	58	879	75	1700
529	0.0033631	110	914	43	1718
530	0.0023658	9	910	69	1811
531	0.0033488	199	971	57	1743
532	0.0033754	35	854	48	1673
533	0.0025951	17	857	46	1697
534	0.0022306	21	940	38	1859
535	0.0033558	28	941	61	1854
536	0.002272	13	875	51	1737
537	0.0034518	38	825	54	1612
538	0.0034522	24	940	60	1856
539	0.0034464	42	959	54	1876
540	0.0021873	13	910	47	1807
541	0.0033428	114	988	43	1862
542	0.0034743	70	852	37	1634
543	0.0034008	95	973	47	1851
544	0.0033616	48	863	67	1678
545	0.0033378	69	939	61	1809
546	0.0030248	51	930	41	1809
547	0.0023831	47	959	42	1871
548	0.00343	83	1056	54	2029
549	0.0034675	117	937	40	1757
550	0.0029747	20	884	57	1748
551	0.0019884	20	929	63	1838
552	0.0033493	31	870	49	1709
553	0.0033689	114	905	40	1696
554	0.0034485	26	951	64	1876
555	0.003366	56	943	45	1830
556	0.0027396	44	834	41	1624
557	0.0021058	22	823	52	1624
558	0.0034163	40	932	42	1824
559	0.0034417	97	937	51	1777
560	0.0033573	88	887	60	1686
561	0.0024176	0	932	48	1864
562	0.0034911	50	922	49	1794
563	0.0020486	16	874	44	1732
564	0.0034486	136	991	61	1846
565	0.0022243	15	856	44	1697
566	0.0032857	43	916	60	1789
567	0.003516	46	967	47	1888
568	0.0034914	150	1019	50	1888
569	0.0020217	13	890	49	1767
570	0.0033743	80	979	47	1878
571	0.0027452	28	894	45	1760
572	0.0034094	150	957	58	1764
573	0.002476	23	899	60	1775
574	0.0019909	9	794	52	1579
575	0.0034423	59	912	43	1765
576	0.0033755	31	865	40	1699
577	0.0034916	100	853	43	1606
578	0.0028489	12	896	53	1780
579	0.003382	55	887	56	1719
580	0.0033431	72	921	62	1770
581	0.003508	48	896	45	1744
582	0.0034476	52	956	57	1860
583	0.0033849	159	984	39	1809
584	0.0030927	28	879	53	1730
585	0.003515	67	811	44	1555
586	0.0033795	27	879	40	1731
587	0.0035871	31	929	53	1827
588	0.0035033	81	1040	53	1999
589	0.002083	85	930	56	1775
590	0.002239	12	918	52	1824
591	0.0035093	46	924	51	1802
592	0.0034644	32	895	44	1758
593	0.003426	56	861	34	1666
594	0.0032963	138	1008	53	1878
595	0.0035667	151	933	35	1715
596	0.0034134	37	853	49	1669
597	0.0021028	12	782	45	1552
598	0.0034646	55	929	45	1803
599	0.0030794	9	833	58	1657
600	0.0033615	55	940	42	1825
601	0.0034268	33	899	39	1765
602	0.0020189	77	916	58	1755
603	0.0029103	11	930	73	1849
604	0.0029033	24	890	64	1756
605	0.003384	94	875	50	1656
606	0.0034636	31	851	55	1671
607	0.0029709	23	911	67	1799
608	0.0022778	21	855	45	1689
609	0.0026942	14	950	46	1886
610	0.0022052	20	938	45	1856
611	0.0024604	22	910	38	1798
612	0.0035755	36	846	75	1656
613	0.0034829	87	990	69	1893
614	0.0024324	14	870	50	1726
615	0.0034261	94	972	61	1850
616	0.0034123	46	881	50	1716
617	0.0034397	31	903	40	1775
618	0.0019513	14	867	42	1720
619	0.0020426	13	888	46	1763
620	0.0017717	5	774	41	1543
621	0.0018797	12	845	66	1678
622	0.0034758	50	991	46	1932
623	0.0033433	29	931	68	1833
624	0.0034302	23	874	61	1725
625	0.0025111	9	839	42	1669
626	0.0033612	30	886	70	1742
627	0.0024625	2	838	66	1674
628	0.003411	33	911	48	1789
629	0.0025718	6	907	45	1808
630	0.0036213	48	865	64	1682
631	0.0028457	62	879	79	1696
632	0.0034162	46	964	45	1882
633	0.0033831	194	1025	47	1856
634	0.0018978	5	893	39	1781
635	0.0034099	27	839	50	1651
636	0.003624	174	921	39	1668
637	0.0024214	12	874	73	1736
638	0.0034156	41	887	66	1733
639	0.0033744	71	873	49	1675
640	0.0033841	36	907	44	1778
641	0.0034327	57	980	57	1903
642	0.0033278	54	925	64	1796
643	0.0035687	113	997	79	1881
644	0.0033382	104	912	63	1720
645	0.0024202	4	919	50	1834
646	0.0034204	93	937	55	1781
647	0.0032565	81	983	50	1885
648	0.003137	25	952	60	1879
649	0.0034086	38	894	52	1750
650	0.0035446	40	915	48	1790
651	0.0033264	25	902	48	1779
652	0.002407	17	883	51	1749
653	0.0034432	57	834	49	1611
654	0.0034399	31	931	48	1831
655	0.0033875	122	1002	57	1882
656	0.0034728	72	957	58	1842
657	0.0021743	1	807	84	1613
658	0.0033299	99	936	59	1773
659	0.0032926	116	929	57	1742
660	0.0034576	136	926	76	1716
661	0.0031207	13	889	50	1765
662	0.0020487	1	839	40	1677
663	0.0033795	32	849	52	1666
664	0.0033899	49	871	59	1693
665	0.0020323	0	852	56	1704
666	0.0034354	57	941	49	1825
667	0.0034047	161	913	75	1665
668	0.0034511	40	928	47	1816
669	0.0034292	59	939	57	1819
670	0.003493	34	916	64	1798
671	0.0033655	57	895	57	1733
672	0.0033323	17	909	38	1801
673	0.0029589	24	879	44	1734
674	0.0035096	51	861	53	1671
675	0.0033382	56	898	58	1740
676	0.0033664	96	922	47	1748
677	0.0035287	44	905	49	1766
678	0.0025468	25	922	41	1819
679	0.0021091	21	865	40	1709
680	0.0033688	71	925	55	1779
681	0.0027772	3	940	53	1877
682	0.003472	101	893	55	1685
683	0.0035261	28	924	40	1820
684	0.0034232	69	895	56	1721
685	0.0034916	75	832	38	1589
686	0.0034568	42	926	78	1810
687	0.0034087	106	946	37	1786
688	0.0034641	70	937	61	1804
689	0.0031773	75	964	79	1853
690	0.0025242	23	892	66	1761
691	0.0027701	13	841	43	1669
692	0.0019056	21	839	47	1657
693	0.0033999	55	896	42	1737
694	0.0035164	72	923	52	1774
695	0.0024788	29	836	50	1643
696	0.0032794	55	905	39	1755
697	0.0035326	102	941	48	1780
698	0.0025773	22	958	49	1894
699	0.0035273	67	965	50	1863
700	0.0033453	32	937	77	1842
701	0.0036346	36	875	55	1714
702	0.0032895	66	919	47	1772
703	0.0040215	161	1007	66	1853
704	0.0020176	11	860	43	1709
705	0.0034612	39	998	45	1957
706	0.0021679	21	929	48	1837
707	0.0033486	70	861	53	1652
708	0.003329	37	948	50	1859
709	0.0034069	87	920	58	1753
710	0.0034359	60	891	39	1722
711	0.0035909	88	957	49	1826
712	0.0034025	20	928	45	1836
713	0.0033468	58	948	76	1838
714	0.0034751	43	985	48	1927
715	0.0033693	59	894	39	1729
716	0.0032885	66	897	41	1728
717	0.0022326	37	899	51	1761
718	0.0034329	20	812	49	1604
719	0.0034043	25	931	49	1837
720	0.0033994	34	898	45	1762
721	0.0034366	115	958	53	1801
722	0.0035472	112	969	53	1826
723	0.0034105	147	961	45	1775
724	0.0035129	52	921	39	1790
725	0.0027613	35	922	51	1809
726	0.0037584	142	942	48	1742
727	0.0030914	24	857	48	1690
728	0.0033063	81	929	67	1777
729	0.0034564	72	944	50	1816
730	0.0033581	57	932	54	1807
731	0.0033716	103	1026	93	1949
732	0.0027405	28	849	39	1670
733	0.0034695	30	967	38	1904
734	0.0026514	10	867	46	1724
735	0.003385	42	944	45	1846
736	0.0034223	23	973	45	1923
737	0.0039029	45	870	44	1695
738	0.0026095	4	816	36	1628
739	0.0024285	8	975	49	1942
740	0.0034333	43	1055	64	2067
741	0.0022631	27	941	52	1855
742	0.0033213	99	886	43	1673
743	0.0034027	22	939	42	1856
744	0.0036465	65	879	43	1693
745	0.0034481	55	905	45	1755
746	0.003503	47	852	50	1657
747	0.003382	161	919	59	1677
748	0.0035091	123	953	47	1783
749	0.0033672	56	902	56	1748
750	0.0036093	52	915	44	1778
751	0.0034938	42	1012	60	1982
752	0.002204	0	869	42	1738
753	0.0032847	28	901	52	1774
754	0.0034596	22	950	42	1878
755	0.0033399	65	947	49	1829
756	0.0034016	80	926	56	1772
757	0.0033263	40	952	93	1864
758	0.0033358	79	863	43	1647
759	0.0033508	59	914	47	1769
760	0.0033995	85	915	70	1745
761	0.003075	23	910	64	1797
762	0.0025837	11	924	64	1837
763	0.0034311	91	981	50	1871
764	0.0033948	127	990	53	1853
765	0.0024116	6	878	57	1750
766	0.0027364	12	854	39	1696
767	0.0034214	29	949	58	1869
768	0.0024621	7	937	56	1867
769	0.0020004	12	929	58	1846
770	0.0033976	43	864	54	1685
771	0.0034969	33	830	36	1627
772	0.0035746	47	870	42	1693
773	0.0034583	116	915	40	1714
774	0.0033854	80	855	65	1630
775	0.0034235	17	925	47	1833
776	0.0023366	18	946	54	1874
777	0.0034037	36	911	66	1786
778	0.0033875	108	898	60	1688
779	0.0028627	14	909	55	1804
780	0.0026122	0	920	70	1840
781	0.0023927	1	859	38	1717
782	0.0033862	128	897	36	1666
783	0.0034702	53	909	52	1765
784	0.002749	10	855	38	1700
785	0.0033978	32	953	61	1874
786	0.0033781	51	898	48	1745
787	0.0033984	73	927	48	1781
788	0.0033723	57	910	51	1763
789	0.0033694	68	983	57	1898
790	0.0023937	3	835	46	1667
791	0.0034711	229	1040	76	1851
792	0.0018408	6	832	41	1658
793	0.0020227	3	837	57	1671
794	0.0026958	1	858	55	1715
795	0.0034436	52	918	54	1784
796	0.0033992	288	1003	59	1718
797	0.0033859	42	849	49	1656
798	0.003367	97	899	56	1701
799	0.0034696	83	874	49	1665
800	0.0034626	84	941	58	1798
801	0.0035278	30	901	70	1772
802	0.0034299	102	884	46	1666
803	0.002616	13	858	52	1703
804	0.0034279	19	857	53	1695
805	0.0034296	38	878	47	1718
806	0.0034836	58	978	45	1898
807	0.0035482	81	985	62	1889
808	0.0034931	63	899	39	1735
809	0.001709	10	886	57	1762
810	0.00279	14	928	65	1842
811	0.0032996	61	972	44	1883
812	0.003475	105	899	38	1693
813	0.0019528	31	875	42	1719
814	0.0033606	74	926	43	1778
815	0.0033922	65	960	53	1855
816	0.0034745	40	883	62	1726
817	0.0020364	10	806	43	1602
818	0.0036919	85	938	54	1791
819	0.0034539	66	849	43	1632
820	0.0034141	165	915	37	1665
821	0.0029736	25	940	41	1855
822	0.0034257	39	860	42	1681
823	0.00347	67	914	55	1761
824	0.0035156	45	949	50	1853
825	0.0034701	25	839	60	1653
826	0.0024107	12	856	33	1700
827	0.0023887	13	864	51	1715
828	0.0025906	18	884	67	1750
829	0.0032241	39	882	62	1725
830	0.0037209	30	963	58	1896
831	0.0034599	42	924	54	1806
832	0.0033699	50	932	61	1814
833	0.0027281	16	938	63	1860
834	0.0020541	27	903	64	1779
835	0.0036233	65	948	53	1831
836	0.0033994	34	849	50	1664
837	0.0023417	22	962	43	1902
838	0.003394	66	913	47	1760
839	0.0035108	75	966	64	1857
840	0.0033785	44	918	48	1792
841	0.0033986	37	882	51	1727
842	0.0035434	57	962	57	1867
843	0.0026145	16	853	41	1690
844	0.0035159	30	947	61	1864
845	0.0037553	85	882	35	1679
846	0.002329	23	905	42	1787
847	0.0033329	44	970	43	1896
848	0.0033387	77	906	83	1735
849	0.0032774	149	947	41	1745
850	0.0034724	81	950	56	1819
851	0.0034299	146	857	54	1568
852	0.003465	42	911	45	1780
853	0.0034239	101	846	36	1591
854	0.0035354	44	893	66	1742
855	0.0032876	81	880	47	1679
856	0.0036213	170	954	36	1738
857	0.0033208	36	931	45	1826
858	0.0034349	33	876	64	1719
859	0.0020347	32	868	63	1704
860	0.0031031	15	887	49	1759
861	0.0020532	7	880	41	1753
862	0.0034676	72	853	48	1634
863	0.001984	21	831	44	1641
864	0.003502	69	926	94	1783
865	0.002837	34	910	42	1786
866	0.0033665	64	957	42	1850
867	0.0034294	124	979	42	1834
868	0.0035943	21	950	50	1879
869	0.0033852	104	915	67	1726
870	0.0034856	120	961	45	1802
871	0.0033182	118	947	46	1776
872	0.0022633	32	901	45	1770
873	0.0020733	17	955	64	1893
874	0.0035621	117	1008	47	1899
875	0.0034396	76	899	52	1722
876	0.0034715	62	903	37	1744
877	0.0034347	76	903	38	1730
878	0.0031586	41	941	51	1841
879	0.0036346	157	948	72	1739
880	0.0034175	37	921	47	1805
881	0.0025453	7	837	47	1667
882	0.0026284	12	973	73	1934
883	0.0020843	2	969	46	1936
884	0.0035029	37	933	48	1829
885	0.0033043	102	957	56	1812
886	0.0035215	64	894	60	1724
887	0.0040686	49	857	60	1665
888	0.0021492	35	912	60	1789
889	0.0026119	22	880	41	1738
890	0.0032662	4	907	60	1810
891	0.0035573	36	923	51	1810
892	0.0034611	115	988	43	1861
893	0.0023959	17	868	48	1719
894	0.0033001	34	907	53	1780
895	0.00234	1	938	54	1875
896	0.0020825	36	857	46	1678
897	0.0023726	24	932	42	1840
898	0.0035351	118	961	59	1804
899	0.0024895	16	937	56	1858
900	0.0022158	16	942	59	1868
901	0.0036206	220	973	36	1726
902	0.0035139	54	901	57	1748
903	0.0027242	23	800	43	1577
904	0.0033407	33	863	55	1693
905	0.0019649	14	848	62	1682
906	0.0032584	53	892	51	1731
907	0.0034061	87	963	50	1839
908	0.0034841	114	949	38	1784
909	0.0035237	70	963	49	1856
910	0.0019216	15	800	44	1585
911	0.0034383	28	836	50	1644
912	0.0033069	49	875	41	1701
913	0.0024117	13	908	97	1803
914	0.0035745	99	926	43	1753
915	0.0033496	87	883	67	1679
916	0.0027417	1	933	58	1865
917	0.0022262	5	902	40	1799
918	0.0034109	42	872	48	1702
919	0.0034076	108	931	64	1754
920	0.0021806	17	890	82	1763
921	0.0024049	18	850	48	1682
922	0.0027577	2	965	55	1928
923	0.0033386	116	990	57	1864
924	0.0035829	203	1085	65	1967
925	0.0033348	74	958	59	1842
926	0.0035328	151	934	51	1717
927	0.0033822	18	823	37	1628
928	0.0031723	51	913	55	1775
929	0.0017549	19	851	54	1683
930	0.0033555	152	1019	47	1886
931	0.0029853	23	908	58	1793
932	0.0034209	38	931	54	1824
933	0.0034624	98	993	48	1888
934	0.0033238	13	885	43	1757
935	0.0021625	6	885	43	1764
936	0.0032222	46	880	48	1714
937	0.0022003	5	893	53	1781
938	0.0034435	100	955	57	1810
939	0.0023144	15	913	63	1811
940	0.0024746	15	887	45	1759
941	0.0034591	29	880	60	1731
942	0.0035539	27	965	43	1903
943	0.0019038	36	865	40	1694
944	0.0027834	2	852	50	1702
945	0.0033544	18	947	56	1876
946	0.0027041	8	873	46	1738
947	0.0025	29	923	60	1817
948	0.002059	8	931	46	1854
949	0.0036129	52	856	44	1660
950	0.0030291	42	978	65	1914
951	0.0034706	84	1004	68	1924
952	0.0022274	10	870	43	1730
953	0.0019835	3	831	39	1659
954	0.0025284	6	938	50	1870
955	0.0022299	21	921	70	1821
956	0.0020718	6	882	66	1758
957	0.0028666	6	872	84	1738
958	0.0034668	70	903	51	1736
959	0.0033968	120	965	39	1810
960	0.0032816	94	923	42	1752
961	0.0034668	46	870	52	1694
962	0.0034997	50	975	59	1900
963	0.0024055	34	949	48	1864
964	0.0027404	36	918	84	1800
965	0.0033677	38	906	57	1774
966	0.0037126	125	954	63	1783
967	0.0033635	94	1046	48	1998
968	0.0033228	88	933	56	1778
969	0.0032929	31	900	48	1769
970	0.0033551	27	850	62	1673
971	0.0024731	23	932	48	1841
972	0.0033854	20	868	42	1716
973	0.0033611	62	814	40	1566
974	0.0024608	15	888	59	1761
975	0.0034498	25	906	43	1787
976	0.0030269	23	874	61	1725
977	0.0033928	16	933	49	1850
978	0.0035123	94	936	45	1778
979	0.0025114	32	926	42	1820
980	0.0034344	65	922	54	1779
981	0.0034902	80	900	52	1720
982	0.0034133	67	971	58	1875
983	0.0034186	45	926	40	1807
984	0.0026117	25	940	50	1855
985	0.0023092	16	943	53	1870
986	0.0036339	59	927	72	1795
987	0.0033246	103	954	58	1805
988	0.003355	104	945	46	1786
989	0.0031282	8	849	53	1690
990	0.0036167	76	870	44	1664
991	0.0035282	50	918	40	1786
992	0.0024306	10	870	45	1730
993	0.001937	1	892	56	1783
994	0.0035018	111	945	51	1779
995	0.0034881	43	888	35	1733
996	0.0022186	0	873	52	1746
997	0.0033051	34	902	50	1770
998	0.0033593	44	829	33	1614
999	0.0021581	24	842	57	1660
mean	0.00311189	51.647	909.727	51.802	1767.81
