# Supplementary material
Source: ML conference proceedings conference paper supplement (https://openreview.net/forum?id=2rAiDBJgR_)
Supplement: supplementary_material [file DD_size-20_test.xlsx]

## Sheet: GS_MaleOpt
	time	SEq	Bal	Reg	Egal
0	0.0001866	9	140	18	271
1	0.0001723	37	150	19	263
2	0.0001985	49	167	18	285
3	0.0001773	18	149	15	280
4	0.0002194	3	140	18	277
5	0.0001741	29	155	17	281
6	0.000229	34	165	19	296
7	0.0002716	26	159	18	292
8	0.0001875	37	161	19	285
9	0.0001815	19	140	18	261
10	0.000186	15	147	18	279
11	0.0001772	46	164	17	282
12	0.000184	2	136	13	270
13	0.0002066	21	153	16	285
14	0.0002059	9	145	18	281
15	0.0001696	52	165	19	278
16	0.0001829	2	138	16	274
17	0.000166	67	177	16	287
18	0.000182	22	147	15	272
19	0.0001769	41	160	17	279
20	0.0001983	72	182	18	292
21	0.0001805	10	143	15	276
22	0.000184	29	153	17	277
23	0.0002014	23	135	16	247
24	0.000178	44	160	19	276
25	0.0001819	10	148	19	286
26	0.0001775	10	135	15	260
27	0.0002434	79	192	19	305
28	0.0002082	1	140	15	279
29	0.0001765	34	146	18	258
30	0.0002084	38	153	16	268
31	0.0001765	52	168	19	284
32	0.0002148	12	135	18	258
33	0.0001795	25	148	19	271
34	0.0002115	10	143	15	276
35	0.000228	36	152	17	268
36	0.0001807	58	178	18	298
37	0.0001725	36	152	17	268
38	0.000186	23	146	14	269
39	0.0001893	19	147	15	275
40	0.0001784	34	150	18	266
41	0.0001772	11	132	16	253
42	0.0001809	6	140	17	274
43	0.000186	11	139	15	267
44	0.0002139	35	154	18	273
45	0.0001763	30	150	19	270
46	0.0002264	47	168	19	289
47	0.0001812	38	159	18	280
48	0.0001738	46	160	18	274
49	0.0001746	24	151	15	278
50	0.0001821	18	145	18	272
51	0.0002258	19	150	18	281
52	0.0001866	24	147	17	270
53	0.000185	12	143	18	274
54	0.0001767	51	164	16	277
55	0.0002328	5	137	17	269
56	0.0001785	52	169	19	286
57	0.0001854	9	142	16	275
58	0.0001772	11	133	13	255
59	0.0001834	26	143	15	260
60	0.0001915	56	170	19	284
61	0.0001753	22	141	15	260
62	0.0001818	40	155	18	270
63	0.0001896	32	159	18	286
64	0.000176	54	170	19	286
65	0.0001846	33	156	19	279
66	0.0001733	29	148	19	267
67	0.0001864	60	174	17	288
68	0.0001749	14	148	19	282
69	0.0001926	13	149	17	285
70	0.0001945	13	142	16	271
71	0.0001854	48	165	17	282
72	0.0001813	44	168	18	292
73	0.0001841	53	166	18	279
74	0.0001815	32	157	18	282
75	0.0002308	9	139	17	269
76	0.0001782	50	163	18	276
77	0.0002058	49	166	19	283
78	0.0001798	43	164	18	285
79	0.0001812	11	147	18	283
80	0.0001798	22	141	15	260
81	0.0001826	58	172	18	286
82	0.0001842	18	146	19	274
83	0.0002321	12	139	16	266
84	0.0001812	64	180	17	296
85	0.0001784	36	164	18	292
86	0.0001779	23	140	19	257
87	0.0001751	40	159	18	278
88	0.0002108	26	152	19	278
89	0.0001797	26	146	13	266
90	0.0001847	23	150	17	277
91	0.0002042	14	138	16	262
92	0.0001924	23	155	19	287
93	0.0001983	35	159	18	283
94	0.0001833	27	148	18	269
95	0.0001842	61	174	19	287
96	0.000238	24	154	18	284
97	0.0001837	73	182	18	291
98	0.000184	35	157	19	279
99	0.0001817	25	145	18	265
100	0.0002004	34	154	18	274
101	0.0001806	22	148	17	274
102	0.0001771	56	170	18	284
103	0.0002228	31	154	18	277
104	0.0001801	31	161	19	291
105	0.0001931	2	134	17	266
106	0.0002024	15	151	18	287
107	0.0003873	6	136	17	266
108	0.0001766	53	162	19	271
109	0.0002011	38	164	16	290
110	0.0002043	61	169	18	277
111	0.0001795	49	168	19	287
112	0.0002032	7	142	14	277
113	0.0001848	27	147	15	267
114	0.0001958	39	162	16	285
115	0.0002007	26	150	16	274
116	0.0001882	30	147	15	264
117	0.0002126	4	139	16	274
118	0.0001771	24	147	13	270
119	0.0001758	28	144	16	260
120	0.0001788	43	162	18	281
121	0.0001981	10	139	17	268
122	0.0001776	21	144	17	267
123	0.0001807	2	127	17	252
124	0.0002363	8	143	19	278
125	0.0001829	2	127	13	252
126	0.0001926	6	138	14	270
127	0.0001828	29	154	16	279
128	0.000183	37	156	18	275
129	0.0001848	54	167	17	280
130	0.0002493	12	138	15	264
131	0.0002286	3	130	16	257
132	0.0001835	27	159	15	291
133	0.0001786	42	151	19	260
134	0.0001946	15	148	17	281
135	0.0002038	2	137	16	272
136	0.0002091	68	171	18	274
137	0.0001712	57	162	18	267
138	0.0001831	39	162	19	285
139	0.0001815	22	146	15	270
140	0.0001949	15	138	14	261
141	0.0001867	10	142	17	274
142	0.0001853	12	146	16	280
143	0.0001761	15	140	14	265
144	0.0001732	59	172	19	285
145	0.0002031	10	142	16	274
146	0.0001841	11	136	18	261
147	0.0002123	36	166	17	296
148	0.0001925	32	160	17	288
149	0.0001853	33	157	17	281
150	0.0002065	31	156	17	281
151	0.0001897	15	137	14	259
152	0.0001764	42	162	19	282
153	0.000192	38	161	16	284
154	0.0002048	25	147	16	269
155	0.000187	55	173	17	291
156	0.0002051	5	139	18	273
157	0.0001839	9	139	17	269
158	0.0001864	41	157	18	273
159	0.0001763	43	159	19	275
160	0.0001848	12	141	18	270
161	0.0002417	20	146	18	272
162	0.0001829	19	148	17	277
163	0.0001719	87	197	19	307
164	0.0002074	62	175	17	288
165	0.0001746	59	168	18	277
166	0.0001759	56	174	18	292
167	0.0001963	15	144	18	273
168	0.000217	18	157	19	296
169	0.0002005	30	150	19	270
170	0.0001888	57	169	17	281
171	0.000195	39	159	17	279
172	0.0001885	44	161	13	278
173	0.0001884	23	146	15	269
174	0.00018	40	159	18	278
175	0.0001836	45	172	19	299
176	0.0001786	42	159	18	276
177	0.0001928	22	149	14	276
178	0.0001787	26	156	17	286
179	0.0001942	47	162	15	277
180	0.0001996	1	128	14	255
181	0.0001966	19	151	16	283
182	0.0002177	15	139	16	263
183	0.0001764	34	160	16	286
184	0.0001957	34	149	18	264
185	0.000177	18	138	18	258
186	0.0001735	46	160	17	274
187	0.0001843	26	138	15	250
188	0.0001968	29	164	18	299
189	0.0002658	38	153	17	268
190	0.0002321	17	132	16	247
191	0.0001805	29	155	19	281
192	0.0001818	12	137	17	262
193	0.0002066	54	170	16	286
194	0.0002233	60	172	18	284
195	0.0001942	16	142	18	268
196	0.0001841	36	152	18	268
197	0.0001744	23	144	19	265
198	0.0002051	19	148	16	277
199	0.0001745	45	161	14	277
200	0.000176	15	139	15	263
201	0.0001832	27	150	19	273
202	0.0002002	19	148	18	277
203	0.0001848	55	176	19	297
204	0.0001951	14	152	18	290
205	0.0001838	40	161	17	282
206	0.0001805	12	137	14	262
207	0.0001805	38	158	16	278
208	0.0002286	40	163	19	286
209	0.0001813	25	149	16	273
210	0.000184	17	143	19	269
211	0.0001803	17	143	16	269
212	0.0001869	31	157	19	283
213	0.0001811	57	168	17	279
214	0.0001969	66	183	18	300
215	0.0001994	42	157	15	272
216	0.0001989	34	157	17	280
217	0.000187	42	160	18	278
218	0.0001821	17	140	14	263
219	0.0001971	30	157	16	284
220	0.0001736	46	164	18	282
221	0.0001893	14	145	19	276
222	0.0001761	5	134	16	263
223	0.000174	2	134	14	266
224	0.0001834	52	169	19	286
225	0.0001752	35	157	18	279
226	0.0001761	39	160	19	281
227	0.0001797	2	133	18	264
228	0.0001861	50	167	19	284
229	0.000178	43	153	15	263
230	0.0001758	43	162	14	281
231	0.0002002	38	159	18	280
232	0.0002002	14	145	17	276
233	0.000187	42	157	19	272
234	0.000191	43	170	19	297
235	0.0001963	4	136	13	268
236	0.0001803	48	162	18	276
237	0.0001814	44	162	19	280
238	0.0002041	18	149	16	280
239	0.000185	9	135	17	261
240	0.0001895	22	155	16	288
241	0.000211	47	162	16	277
242	0.0001797	77	187	19	297
243	0.0002021	20	152	19	284
244	0.0001899	19	146	16	273
245	0.0002317	4	132	15	260
246	0.0001941	14	139	16	264
247	0.0002406	61	171	17	281
248	0.0001922	13	141	15	269
249	0.000178	54	173	19	292
250	0.000184	18	146	19	274
251	0.0001826	30	147	15	264
252	0.0002115	10	150	19	290
253	0.0001781	5	131	15	257
254	0.0001792	39	158	15	277
255	0.0002141	3	146	17	289
256	0.0002027	17	144	17	271
257	0.0001841	18	142	16	266
258	0.000179	33	150	17	267
259	0.0001937	14	142	18	270
260	0.0002116	27	153	16	279
261	0.0001771	38	157	19	276
262	0.0001821	26	143	18	260
263	0.0002074	13	141	17	269
264	0.0001826	36	158	18	280
265	0.0001823	57	171	19	285
266	0.0001944	44	162	18	280
267	0.0001956	25	157	17	289
268	0.0001734	56	166	17	276
269	0.0001818	50	162	18	274
270	0.0002063	20	147	16	274
271	0.0001888	59	174	18	289
272	0.0001906	13	143	16	273
273	0.0001903	19	137	18	255
274	0.0002001	46	171	18	296
275	0.0002671	41	153	17	265
276	0.0001752	49	167	16	285
277	0.0001933	7	137	18	267
278	0.0002007	27	150	17	273
279	0.0001729	64	169	18	274
280	0.0001994	61	180	19	299
281	0.000181	33	166	17	299
282	0.0001959	6	143	18	280
283	0.0001983	26	139	16	252
284	0.0001914	32	153	16	274
285	0.0001816	32	155	19	278
286	0.0001944	18	148	14	278
287	0.0001772	51	166	17	281
288	0.000191	51	169	18	287
289	0.0001748	4	136	15	268
290	0.0002145	13	150	17	287
291	0.0002144	37	160	19	283
292	0.0002001	20	145	18	270
293	0.0001659	40	150	19	260
294	0.0001808	3	142	19	281
295	0.0001952	34	158	17	282
296	0.000198	35	159	17	283
297	0.0001791	28	152	17	276
298	0.0002136	15	142	15	269
299	0.0001893	57	168	18	279
300	0.0002044	33	153	18	273
301	0.0002019	32	148	19	264
302	0.0001792	42	154	18	266
303	0.0001761	29	143	17	257
304	0.0001993	10	146	16	282
305	0.0001941	3	139	17	275
306	0.0001901	69	179	19	289
307	0.0002031	34	157	19	280
308	0.0001874	20	158	18	296
309	0.0001765	23	147	18	271
310	0.0001985	16	149	18	282
311	0.000179	50	163	19	276
312	0.000184	34	164	18	294
313	0.0002072	33	157	15	281
314	0.0001872	26	155	19	284
315	0.0001789	34	155	19	276
316	0.0002391	40	153	15	266
317	0.0002077	31	156	18	281
318	0.0001869	12	143	19	274
319	0.0001826	54	163	18	272
320	0.0001795	12	137	18	262
321	0.00017	42	160	18	278
322	0.0001807	14	138	15	262
323	0.0002036	17	146	19	275
324	0.0001744	24	138	15	252
325	0.0001958	15	133	16	251
326	0.0002031	30	153	16	276
327	0.0001996	16	138	15	260
328	0.0001779	6	144	16	282
329	0.000189	0	132	19	264
330	0.000176	46	161	19	276
331	0.0002109	17	141	14	265
332	0.0001935	5	143	17	281
333	0.0001877	78	187	19	296
334	0.0001886	30	162	19	294
335	0.000181	24	150	19	276
336	0.0001773	44	159	15	274
337	0.0001745	55	172	18	289
338	0.0001942	33	155	19	277
339	0.0001869	14	144	17	274
340	0.0002223	1	136	17	271
341	0.0002083	40	164	17	288
342	0.0001829	2	138	14	274
343	0.0001988	36	159	15	282
344	0.0002002	1	137	19	273
345	0.0002069	32	158	18	284
346	0.0001862	39	151	19	263
347	0.0001853	21	146	17	271
348	0.0001897	8	139	15	270
349	0.0001932	17	155	17	293
350	0.0001859	39	164	19	289
351	0.0001912	37	162	18	287
352	0.0001814	26	150	17	274
353	0.0001792	12	142	14	272
354	0.0001844	36	156	17	276
355	0.0001762	47	159	19	271
356	0.0002072	55	168	17	281
357	0.0001795	17	148	17	279
358	0.0001832	26	151	16	276
359	0.0001952	48	166	19	284
360	0.0001882	33	153	16	273
361	0.000178	29	153	17	277
362	0.0001876	17	144	19	271
363	0.0001829	29	154	19	279
364	0.0002008	29	152	15	275
365	0.0001794	53	162	17	271
366	0.0001985	29	152	19	275
367	0.0001862	11	136	14	261
368	0.0002055	10	142	16	274
369	0.0001845	5	137	18	269
370	0.0001839	56	174	18	292
371	0.0001859	18	146	19	274
372	0.0001832	56	172	19	288
373	0.0001951	44	166	19	288
374	0.0001815	59	178	17	297
375	0.0001769	64	176	19	288
376	0.0001892	26	157	19	288
377	0.0002081	10	141	16	272
378	0.0001886	11	132	16	253
379	0.0001948	17	147	19	277
380	0.0001957	24	155	18	286
381	0.0001862	35	153	18	271
382	0.0002246	17	142	15	267
383	0.0001976	18	147	16	276
384	0.0001926	10	140	16	270
385	0.0002028	19	144	19	269
386	0.0001825	20	146	18	272
387	0.0001836	6	130	14	254
388	0.0001869	45	170	19	295
389	0.000185	20	149	16	278
390	0.0002315	36	151	18	266
391	0.0002274	10	139	16	268
392	0.0001783	50	165	18	280
393	0.0001775	20	138	18	256
394	0.0001811	24	150	17	276
395	0.0001805	0	130	13	260
396	0.000191	53	167	19	281
397	0.0001778	7	135	15	263
398	0.0002041	22	149	18	276
399	0.0001834	22	149	17	276
400	0.0001891	2	131	14	260
401	0.0002044	39	162	17	285
402	0.0001743	31	152	18	273
403	0.0001857	6	141	14	276
404	0.0001955	51	163	16	275
405	0.0001747	39	155	16	271
406	0.0001912	44	166	17	288
407	0.0001723	72	171	19	270
408	0.0001954	70	184	18	298
409	0.0001827	29	150	18	271
410	0.0002249	29	146	14	263
411	0.0001793	19	138	14	257
412	0.0001995	15	145	14	275
413	0.0001911	30	158	18	286
414	0.0002007	15	147	16	279
415	0.0001763	46	164	18	282
416	0.0001849	65	175	19	285
417	0.000195	47	161	18	275
418	0.000202	21	147	17	273
419	0.000179	49	169	19	289
420	0.000183	57	171	18	285
421	0.0001934	16	142	19	268
422	0.0002094	54	172	18	290
423	0.0001824	35	150	14	265
424	0.0002403	19	148	19	277
425	0.0001836	28	155	19	282
426	0.0001912	32	155	16	278
427	0.0001852	36	159	19	282
428	0.0001802	17	152	18	287
429	0.0001905	71	180	19	289
430	0.0002031	27	147	17	267
431	0.0001802	41	163	19	285
432	0.0001862	28	161	19	294
433	0.0001833	43	155	18	267
434	0.0002003	7	137	15	267
435	0.0002095	30	148	16	266
436	0.0001861	11	139	16	267
437	0.0001843	44	161	15	278
438	0.000239	41	160	18	279
439	0.0001846	27	141	18	255
440	0.0001915	29	149	18	269
441	0.0002041	39	158	16	277
442	0.000207	2	133	17	264
443	0.0001948	15	144	18	273
444	0.0001904	33	152	17	271
445	0.0002822	6	136	17	266
446	0.0002072	28	152	18	276
447	0.0001792	31	150	16	269
448	0.0001733	36	154	15	272
449	0.0001881	8	139	19	270
450	0.0001878	14	145	18	276
451	0.0001786	36	157	19	278
452	0.0001998	8	145	17	282
453	0.0002157	21	144	17	267
454	0.0001768	36	158	17	280
455	0.0001931	24	151	18	278
456	0.0002429	40	163	17	286
457	0.0001937	38	157	17	276
458	0.0002151	10	137	15	264
459	0.0002148	1	139	16	277
460	0.0002122	25	146	15	267
461	0.0002298	12	142	18	272
462	0.0001881	12	151	17	290
463	0.0001752	26	144	17	262
464	0.0002014	33	153	18	273
465	0.0001777	36	154	17	272
466	0.0001846	44	166	18	288
467	0.0001784	20	152	17	284
468	0.0001764	30	153	17	276
469	0.0001729	38	156	19	274
470	0.0001863	21	149	17	277
471	0.0001828	25	154	18	283
472	0.0001909	22	144	16	266
473	0.0001877	37	161	19	285
474	0.0001917	18	140	14	262
475	0.000192	3	127	13	251
476	0.000185	40	162	17	284
477	0.0001788	78	186	18	294
478	0.0001831	15	144	16	273
479	0.0001824	21	147	16	273
480	0.0001893	23	143	16	263
481	0.0001832	20	138	15	256
482	0.0001882	0	136	19	272
483	0.0001901	27	148	18	269
484	0.0001942	28	150	19	272
485	0.0001868	57	168	17	279
486	0.0001877	15	140	18	265
487	0.0001714	42	161	15	280
488	0.0001811	13	145	16	277
489	0.0001797	29	144	14	259
490	0.000189	42	158	18	274
491	0.0001855	69	177	19	285
492	0.000301	24	144	19	264
493	0.0002063	52	172	19	292
494	0.0001828	15	145	17	275
495	0.0001802	38	157	17	276
496	0.0001874	27	149	16	271
497	0.0001831	6	142	17	278
498	0.0001945	62	183	19	304
499	0.0002172	16	144	14	272
500	0.0001791	54	172	19	290
501	0.0002212	3	138	16	273
502	0.0001951	22	143	19	264
503	0.0001845	36	154	17	272
504	0.0001784	65	182	19	299
505	0.0001978	38	157	19	276
506	0.0001808	2	138	17	274
507	0.0001794	37	158	18	279
508	0.0001863	2	146	19	290
509	0.0001969	8	137	16	266
510	0.0001949	41	162	19	283
511	0.0001802	6	141	16	276
512	0.0002141	29	145	16	261
513	0.0001852	11	132	18	253
514	0.0002262	2	135	15	268
515	0.0001854	70	175	19	280
516	0.0001814	50	166	16	282
517	0.0001809	4	135	14	266
518	0.0001885	19	141	16	263
519	0.0001736	6	137	13	268
520	0.0003815	25	158	18	291
521	0.0001995	10	133	14	256
522	0.0002225	2	140	15	278
523	0.0001878	34	158	18	282
524	0.0001757	52	158	17	264
525	0.0002025	46	163	19	280
526	0.0002163	46	160	18	274
527	0.0001833	57	175	19	293
528	0.0002218	30	148	18	266
529	0.000188	36	151	18	266
530	0.0002101	14	148	17	282
531	0.0001882	7	140	17	273
532	0.0001993	10	135	13	260
533	0.0001899	22	146	17	270
534	0.0002071	17	148	16	279
535	0.0001833	12	141	15	270
536	0.0001867	1	140	19	279
537	0.0001923	27	141	18	255
538	0.0002458	37	148	19	259
539	0.000187	24	156	17	288
540	0.0001914	41	164	19	287
541	0.0002263	4	133	15	262
542	0.0001801	28	159	19	290
543	0.0002294	30	158	16	286
544	0.0001919	54	174	18	294
545	0.0002224	22	146	15	270
546	0.0002287	1	129	15	257
547	0.0001893	40	164	19	288
548	0.0001886	15	141	16	267
549	0.0001989	38	155	17	272
550	0.0001868	41	158	18	275
551	0.000187	67	176	19	285
552	0.0001886	44	156	17	268
553	0.000189	40	157	19	274
554	0.0001999	31	153	19	275
555	0.0001893	20	144	15	268
556	0.0002319	14	137	13	260
557	0.0001916	22	140	17	258
558	0.0002204	51	173	19	295
559	0.000193	19	147	16	275
560	0.0002137	4	138	16	272
561	0.0001893	11	145	19	279
562	0.0001898	34	156	17	278
563	0.0001914	14	141	18	268
564	0.0001971	61	175	18	289
565	0.000182	34	161	18	288
566	0.0002047	13	143	19	273
567	0.0001855	42	163	19	284
568	0.0001748	28	149	15	270
569	0.0001898	37	154	15	271
570	0.0001903	13	137	15	261
571	0.0001898	33	161	19	289
572	0.0002125	4	137	17	270
573	0.0002179	45	159	18	273
574	0.0001985	29	158	19	287
575	0.0001892	64	182	19	300
576	0.0001967	50	169	19	288
577	0.0002133	19	145	17	271
578	0.0001803	54	165	19	276
579	0.0002016	61	175	17	289
580	0.000224	45	165	16	285
581	0.0001795	34	148	18	262
582	0.0001873	4	136	18	268
583	0.0001812	12	137	15	262
584	0.0001769	51	158	19	265
585	0.0001824	32	152	17	272
586	0.0002112	22	150	17	278
587	0.0001899	31	152	16	273
588	0.0001948	28	146	18	264
589	0.0001957	21	141	16	261
590	0.0002179	29	154	15	279
591	0.0001865	79	193	18	307
592	0.0001767	23	149	17	275
593	0.0001848	47	160	18	273
594	0.0002148	15	142	19	269
595	0.0001745	33	151	15	269
596	0.0002088	17	153	16	289
597	0.0001896	24	151	17	278
598	0.0001811	29	147	19	265
599	0.000213	26	150	17	274
600	0.000211	9	150	18	291
601	0.0001881	40	155	17	270
602	0.0001864	31	148	19	265
603	0.0001796	42	166	19	290
604	0.0001888	35	142	16	249
605	0.0001954	15	140	19	265
606	0.0001905	22	144	17	266
607	0.000247	19	145	17	271
608	0.0002561	43	154	18	265
609	0.0001865	43	166	19	289
610	0.00023	75	182	19	289
611	0.0002001	26	147	18	268
612	0.0001954	2	144	19	286
613	0.0002453	13	149	17	285
614	0.0002389	18	151	19	284
615	0.0002115	11	146	17	281
616	0.0001977	19	144	19	269
617	0.0001966	26	158	17	290
618	0.0001995	25	146	19	267
619	0.0001919	6	136	15	266
620	0.0001866	65	180	19	295
621	0.0001798	25	151	18	277
622	0.0001787	38	161	18	284
623	0.0001823	13	147	16	281
624	0.0001771	46	159	18	272
625	0.0002159	16	147	18	278
626	0.000192	19	139	17	259
627	0.0001997	5	138	19	271
628	0.0002222	45	160	17	275
629	0.0001909	22	148	16	274
630	0.0001927	46	165	19	284
631	0.0001847	26	157	18	288
632	0.0002093	2	143	18	284
633	0.0001925	29	148	18	267
634	0.0001756	51	174	19	297
635	0.0002072	1	138	17	275
636	0.000224	34	156	19	278
637	0.0001767	16	134	18	252
638	0.0002117	48	158	19	268
639	0.0001941	11	148	16	285
640	0.0001883	5	147	17	289
641	0.0001922	65	178	18	291
642	0.0001989	13	143	18	273
643	0.000182	28	157	19	286
644	0.000226	6	131	15	256
645	0.0001785	32	149	17	266
646	0.0002089	9	137	16	265
647	0.0001774	45	170	17	295
648	0.0002024	40	152	16	264
649	0.0001943	43	166	15	289
650	0.000207	0	139	17	278
651	0.0002286	37	153	18	269
652	0.0001926	23	146	18	269
653	0.0002072	56	164	19	272
654	0.0002014	48	165	17	282
655	0.0001966	14	145	16	276
656	0.0001734	25	143	14	261
657	0.0002167	57	177	18	297
658	0.0001961	17	143	19	269
659	0.0002029	7	144	15	281
660	0.0002024	37	158	17	279
661	0.0002022	45	162	18	279
662	0.0001852	38	162	18	286
663	0.0001871	19	146	17	273
664	0.0001893	5	145	17	285
665	0.0001752	30	145	19	260
666	0.0001964	3	136	18	269
667	0.0001864	39	156	16	273
668	0.000189	64	186	18	308
669	0.0001789	9	143	15	277
670	0.0001843	13	145	17	277
671	0.0001854	25	148	15	271
672	0.0002156	49	165	19	281
673	0.0001808	23	145	17	267
674	0.0001862	35	161	18	287
675	0.0002268	39	163	19	287
676	0.0001839	7	134	16	261
677	0.0002061	6	140	15	274
678	0.0001892	28	150	19	272
679	0.0001974	32	156	18	280
680	0.0001822	15	147	18	279
681	0.000191	43	161	17	279
682	0.000188	4	126	13	248
683	0.0001891	3	135	14	267
684	0.0002068	40	154	17	268
685	0.0001904	15	143	17	271
686	0.0001855	5	134	16	263
687	0.0001892	58	177	19	296
688	0.0002151	46	159	18	272
689	0.000197	30	156	19	282
690	0.0001742	37	155	17	273
691	0.0002107	6	135	15	264
692	0.0001952	39	162	14	285
693	0.0001758	27	156	16	285
694	0.0002031	41	152	18	263
695	0.0002057	3	139	17	275
696	0.0001897	9	136	15	263
697	0.000207	10	143	16	276
698	0.0001874	34	149	18	264
699	0.0002182	16	140	19	264
700	0.0001803	17	139	16	261
701	0.000194	12	138	16	264
702	0.0001902	8	132	16	256
703	0.0001874	39	164	19	289
704	0.0001756	85	193	19	301
705	0.000229	49	169	17	289
706	0.0001773	27	146	17	265
707	0.0001992	8	151	17	294
708	0.0002058	21	147	17	273
709	0.000179	26	157	19	288
710	0.0002817	21	148	15	275
711	0.0001726	51	168	17	285
712	0.0001871	3	141	19	279
713	0.0001816	15	146	18	277
714	0.000214	49	166	19	283
715	0.0001872	52	163	18	274
716	0.0001893	37	152	18	267
717	0.0001914	27	143	17	259
718	0.0001889	73	189	18	305
719	0.0001938	24	146	19	268
720	0.0001904	40	165	19	290
721	0.0001787	8	139	19	270
722	0.0001856	9	138	17	267
723	0.0001891	11	142	18	273
724	0.0001788	14	141	17	268
725	0.0002085	3	135	17	267
726	0.0001932	4	138	17	272
727	0.0001776	19	147	19	275
728	0.0002036	24	147	18	270
729	0.0001874	15	142	15	269
730	0.0001941	2	139	17	276
731	0.0001764	58	172	18	286
732	0.0001995	58	168	16	278
733	0.0001947	11	141	15	271
734	0.0002001	46	156	18	266
735	0.0001859	8	135	18	262
736	0.0002356	27	151	18	275
737	0.0001829	22	145	14	268
738	0.0002002	60	171	17	282
739	0.0001916	44	157	19	270
740	0.0001886	48	159	18	270
741	0.000221	46	165	16	284
742	0.0001974	4	141	19	278
743	0.0001818	24	146	18	268
744	0.000195	24	154	17	284
745	0.0002315	17	150	18	283
746	0.0002041	29	154	16	279
747	0.0001829	5	142	15	279
748	0.0001899	12	147	16	282
749	0.0002024	36	156	19	276
750	0.0001807	15	147	17	279
751	0.0001764	51	173	19	295
752	0.0001811	8	140	19	272
753	0.0001795	41	158	16	275
754	0.0002079	13	146	18	279
755	0.0001887	58	167	18	276
756	0.00023	13	141	16	269
757	0.0002114	41	162	19	283
758	0.0001857	4	145	19	286
759	0.000171	58	171	19	284
760	0.0002234	35	153	16	271
761	0.0002576	27	154	18	281
762	0.0001969	38	157	16	276
763	0.0001794	31	145	14	259
764	0.0001989	3	142	16	281
765	0.0002054	10	142	18	274
766	0.000195	91	199	19	307
767	0.0001834	34	155	18	276
768	0.0002455	45	162	19	279
769	0.0001804	38	150	17	262
770	0.0001886	21	140	19	259
771	0.0002195	18	139	14	260
772	0.000196	34	152	17	270
773	0.0002126	11	152	18	293
774	0.0002232	8	133	18	258
775	0.000211	35	154	19	273
776	0.0001845	36	152	18	268
777	0.000175	25	152	18	279
778	0.0002004	24	153	17	282
779	0.0001882	47	161	18	275
780	0.0001772	39	157	16	275
781	0.0001773	25	148	16	271
782	0.000176	20	150	19	280
783	0.0001862	14	148	17	282
784	0.0002149	4	140	17	276
785	0.0001946	33	159	17	285
786	0.0001776	57	170	19	283
787	0.0001792	17	145	14	273
788	0.000216	6	138	15	270
789	0.0001947	18	139	18	260
790	0.0001962	15	141	14	267
791	0.0001876	39	157	15	275
792	0.0002007	12	141	16	270
793	0.0001845	41	164	17	287
794	0.0001985	30	154	19	278
795	0.0001952	18	144	17	270
796	0.000192	24	139	17	254
797	0.0001994	2	135	17	268
798	0.0001763	61	178	18	295
799	0.0002268	47	162	18	277
800	0.0001866	45	157	18	269
801	0.0002123	16	132	19	248
802	0.0001809	17	142	14	267
803	0.0001981	14	154	19	294
804	0.0002161	6	133	18	260
805	0.0001872	19	151	19	283
806	0.0001738	30	142	18	254
807	0.0002055	28	151	18	274
808	0.0001925	29	148	17	267
809	0.0001805	10	137	17	264
810	0.0002038	5	146	15	287
811	0.000207	31	154	18	277
812	0.0001929	30	153	18	276
813	0.0001788	30	153	16	276
814	0.0001945	1	141	15	281
815	0.0001962	39	160	18	281
816	0.0001888	39	156	18	273
817	0.0001927	42	159	18	276
818	0.0001747	73	180	19	287
819	0.0001822	48	163	16	278
820	0.00018	35	154	16	273
821	0.0001664	63	170	19	277
822	0.0001717	73	181	19	289
823	0.0001898	46	162	17	278
824	0.0001971	24	144	17	264
825	0.0001876	35	160	15	285
826	0.0001869	45	166	17	287
827	0.0001782	17	139	17	261
828	0.0002221	22	136	14	250
829	0.0001944	57	171	17	285
830	0.0001952	47	161	17	275
831	0.0001823	7	133	14	259
832	0.0001804	48	159	16	270
833	0.0001732	40	161	16	282
834	0.0001843	52	163	18	274
835	0.0001913	60	173	18	286
836	0.0001725	54	163	19	272
837	0.0001903	3	138	17	273
838	0.0001971	20	147	18	274
839	0.0001814	43	165	17	287
840	0.0001868	12	147	18	282
841	0.0001942	25	151	18	277
842	0.0001874	46	166	18	286
843	0.0001999	38	158	19	278
844	0.0002112	30	155	18	280
845	0.0001758	43	164	17	285
846	0.0001901	16	147	18	278
847	0.000187	2	129	16	256
848	0.0001858	12	138	15	264
849	0.0002282	22	151	19	280
850	0.000185	39	160	17	281
851	0.0001791	38	161	19	284
852	0.0001864	12	143	18	274
853	0.0001814	38	161	19	284
854	0.0001735	60	174	19	288
855	0.0001798	2	128	13	254
856	0.0001897	28	154	18	280
857	0.0002331	13	139	15	265
858	0.0002028	49	171	19	293
859	0.0002048	28	163	17	298
860	0.0001792	7	134	18	261
861	0.0001779	35	147	17	259
862	0.0001969	66	184	19	302
863	0.0002005	27	156	19	285
864	0.0001846	56	168	17	280
865	0.0001968	11	145	18	279
866	0.0001945	2	144	16	286
867	0.0001748	43	164	19	285
868	0.0001821	34	157	19	280
869	0.0001903	39	156	17	273
870	0.0001782	38	155	17	272
871	0.0002165	33	153	19	273
872	0.0001949	31	148	18	265
873	0.0002271	29	150	18	271
874	0.000193	34	151	19	268
875	0.0002047	0	135	19	270
876	0.0001917	24	151	17	278
877	0.0001725	59	173	17	287
878	0.0001855	14	136	14	258
879	0.0001744	36	156	19	276
880	0.0001954	19	138	15	257
881	0.0001823	56	176	18	296
882	0.0001799	54	166	18	278
883	0.0001862	17	138	17	259
884	0.0002117	37	158	18	279
885	0.0001814	15	140	15	265
886	0.000185	12	150	19	288
887	0.0001945	36	159	19	282
888	0.0001876	2	143	16	284
889	0.0001795	4	144	17	284
890	0.000181	8	140	14	272
891	0.0002116	43	158	18	273
892	0.0001761	24	144	15	264
893	0.0001834	49	163	18	277
894	0.000195	8	139	17	270
895	0.0001758	56	178	19	300
896	0.0001943	48	158	19	268
897	0.0002319	39	156	17	273
898	0.0001887	62	174	19	286
899	0.0002046	58	169	18	280
900	0.0001756	60	179	19	298
901	0.0002006	13	140	19	267
902	0.0001782	37	160	19	283
903	0.0001852	33	153	19	273
904	0.0001801	59	168	19	277
905	0.0002007	26	150	18	274
906	0.0001834	4	138	16	272
907	0.0001991	24	155	15	286
908	0.0001797	64	178	19	292
909	0.0001763	20	151	18	282
910	0.0001778	33	160	19	287
911	0.0001945	24	152	19	280
912	0.0001883	63	173	18	283
913	0.0001844	52	168	16	284
914	0.0001807	28	140	14	252
915	0.0002286	45	165	19	285
916	0.0001915	11	144	19	277
917	0.0001813	51	159	17	267
918	0.0001783	62	171	17	280
919	0.0001783	13	148	19	283
920	0.0001886	19	149	15	279
921	0.0001707	24	142	19	260
922	0.000202	40	164	17	288
923	0.0002241	33	158	18	283
924	0.0001841	26	152	17	278
925	0.0001903	17	150	19	283
926	0.0001888	30	157	18	284
927	0.0001895	9	141	14	273
928	0.0001814	17	148	18	279
929	0.0001744	55	164	16	273
930	0.0001855	26	150	19	274
931	0.0001946	22	152	16	282
932	0.0002046	62	176	18	290
933	0.0001806	29	156	17	283
934	0.0002032	32	156	15	280
935	0.0001781	30	156	15	282
936	0.0001857	19	147	15	275
937	0.0002249	6	145	16	284
938	0.0002054	23	149	16	275
939	0.0001849	32	163	17	294
940	0.000192	6	137	16	268
941	0.0001783	24	150	16	276
942	0.0001727	37	153	17	269
943	0.000184	26	142	15	258
944	0.0001992	60	171	19	282
945	0.0001794	44	159	18	274
946	0.0001818	1	144	16	287
947	0.0001846	37	160	19	283
948	0.0002178	40	158	17	276
949	0.0001767	5	142	14	279
950	0.0002424	8	132	16	256
951	0.0001872	11	138	19	265
952	0.0001767	22	148	18	274
953	0.0002232	9	141	19	273
954	0.0002131	43	166	17	289
955	0.0001813	9	144	19	279
956	0.0002124	18	139	18	260
957	0.0001812	29	146	17	263
958	0.0002032	22	150	18	278
959	0.0001755	33	158	18	283
960	0.0001787	8	136	17	264
961	0.0001863	4	135	17	266
962	0.0001679	51	165	16	279
963	0.0001986	39	158	19	277
964	0.0001855	33	157	19	281
965	0.000225	65	177	19	289
966	0.0001776	8	139	14	270
967	0.0001934	26	150	19	274
968	0.0001971	31	154	18	277
969	0.0002055	38	161	19	284
970	0.0001791	18	136	15	254
971	0.0001863	8	140	18	272
972	0.0001873	32	157	18	282
973	0.0001799	23	153	19	283
974	0.0001892	39	166	19	293
975	0.000169	39	156	17	273
976	0.0001956	6	132	17	258
977	0.0001887	46	162	17	278
978	0.0001781	45	157	17	269
979	0.0001852	26	140	14	254
980	0.0001755	21	143	19	265
981	0.0002347	32	161	18	290
982	0.000196	50	167	17	284
983	0.0001836	79	192	17	305
984	0.0001917	2	140	16	278
985	0.0001822	44	167	18	290
986	0.0001919	59	173	19	287
987	0.0001801	42	165	19	288
988	0.0001826	68	177	19	286
989	0.0001741	35	161	18	287
990	0.0001756	52	166	18	280
991	0.0001894	43	159	17	275
992	0.0001961	5	137	17	269
993	0.0001789	17	139	15	261
994	0.0001951	55	165	18	275
995	0.0001911	5	141	17	277
996	0.0001976	22	152	17	282
997	0.0001884	43	162	18	281
998	0.0003212	48	163	16	278
999	0.000182	0	130	16	260
mean	0.000193388	29.396	152.598	17.224	275.8

## Sheet: GS_FemaleOpt
	time	SEq	Bal	Reg	Egal
0	0.0003806	11	140	15	269
1	0.0001867	16	142	18	268
2	0.0001878	1	139	15	277
3	0.0001787	8	141	15	274
4	0.0002028	50	164	18	278
5	0.0001705	27	155	19	283
6	0.0002078	8	144	18	280
7	0.0001739	38	158	17	278
8	0.0001707	56	171	19	286
9	0.0001896	31	146	18	261
10	0.0001754	44	165	18	286
11	0.000219	51	166	19	281
12	0.0001684	11	138	13	265
13	0.0001731	53	169	18	285
14	0.000211	10	144	17	278
15	0.0002003	24	144	19	264
16	0.0001941	28	150	16	272
17	0.0001729	28	150	17	272
18	0.000186	6	140	15	274
19	0.0001791	27	152	16	277
20	0.0001921	69	183	19	297
21	0.0001757	12	146	17	280
22	0.0001894	8	140	17	272
23	0.0001653	43	148	14	253
24	0.00017	47	161	16	275
25	0.0001766	41	171	19	301
26	0.0001771	3	129	15	255
27	0.0001827	51	172	19	293
28	0.0002058	27	147	14	267
29	0.0001732	5	128	14	251
30	0.0001801	6	131	13	256
31	0.0001699	31	158	17	285
32	0.0001659	34	150	19	266
33	0.0001685	21	143	18	265
34	0.000214	39	159	16	279
35	0.0001849	36	152	19	268
36	0.0001731	57	173	18	289
37	0.0001807	0	133	18	266
38	0.000173	41	160	15	279
39	0.0001772	55	166	15	277
40	0.000177	34	155	19	276
41	0.0001925	33	147	16	261
42	0.0001769	6	140	17	274
43	0.0001855	11	139	15	267
44	0.0001944	22	147	18	272
45	0.000202	50	161	19	272
46	0.0001855	21	144	18	267
47	0.0001843	2	139	15	276
48	0.0001752	32	150	15	268
49	0.0001744	38	157	18	276
50	0.0001913	27	152	18	277
51	0.0001741	53	166	19	279
52	0.0001946	21	144	18	267
53	0.000167	47	160	17	273
54	0.0001729	38	157	19	276
55	0.0001877	33	151	17	269
56	0.0001759	11	146	17	281
57	0.0001871	13	143	17	273
58	0.000176	27	146	17	265
59	0.0001754	22	146	19	270
60	0.0001785	6	144	17	282
61	0.0001826	44	156	17	268
62	0.000197	31	153	16	275
63	0.0002025	29	152	18	275
64	0.0001903	28	155	19	282
65	0.0001742	21	148	18	275
66	0.0001685	3	129	17	255
67	0.0002248	55	175	19	295
68	0.0001691	81	186	19	291
69	0.0001953	13	149	17	285
70	0.0001931	26	152	16	278
71	0.0001706	41	166	17	291
72	0.0002131	12	150	17	288
73	0.0001713	39	148	16	257
74	0.0001797	5	140	18	275
75	0.0001766	11	139	17	267
76	0.0001817	20	147	18	274
77	0.0001902	28	152	19	276
78	0.0001817	21	148	19	275
79	0.000173	30	156	18	282
80	0.0001703	24	145	14	266
81	0.000176	37	162	17	287
82	0.0001923	32	154	19	276
83	0.0001741	22	144	16	266
84	0.000184	29	154	13	279
85	0.0001825	38	167	19	296
86	0.000191	19	133	15	247
87	0.0002136	18	150	16	282
88	0.0001792	40	164	19	288
89	0.0001754	2	136	15	270
90	0.0001955	23	150	17	277
91	0.000172	30	145	16	260
92	0.0002159	42	165	19	288
93	0.0001667	46	159	19	272
94	0.0001965	33	155	14	277
95	0.0001877	48	168	16	288
96	0.0001812	1	139	18	277
97	0.0001794	37	157	18	277
98	0.0001714	10	147	18	284
99	0.0001845	4	134	15	264
100	0.0001745	15	144	15	273
101	0.0001776	32	151	15	270
102	0.0001674	32	156	19	280
103	0.0001718	62	169	18	276
104	0.0002033	57	170	18	283
105	0.0001867	4	134	17	264
106	0.00017	69	186	18	303
107	0.0001742	6	136	17	266
108	0.0001815	15	141	17	267
109	0.0001801	53	173	19	293
110	0.0001787	20	149	18	278
111	0.0001777	43	167	18	291
112	0.000194	7	142	14	277
113	0.0001981	40	159	16	278
114	0.000198	29	156	17	283
115	0.0001717	70	177	17	284
116	0.0001894	22	143	15	264
117	0.0001725	35	155	15	275
118	0.0001803	14	143	13	272
119	0.0001826	26	144	14	262
120	0.0001673	23	143	16	263
121	0.0001731	34	154	16	274
122	0.0001741	19	142	19	265
123	0.0002027	26	140	17	254
124	0.0001709	52	176	19	300
125	0.0001889	2	127	13	252
126	0.0001793	12	141	14	270
127	0.0001985	35	160	18	285
128	0.0002122	34	154	18	274
129	0.0001831	15	148	18	281
130	0.0001804	12	138	15	264
131	0.0001704	26	146	16	266
132	0.0001766	23	155	17	287
133	0.0001654	35	149	17	263
134	0.0001896	16	151	18	286
135	0.0001733	23	148	16	273
136	0.0001864	11	137	14	263
137	0.0001749	21	136	18	251
138	0.0001784	43	165	18	287
139	0.0001716	9	138	15	267
140	0.0001698	44	153	14	262
141	0.0001772	24	146	17	268
142	0.0001753	34	157	17	280
143	0.0001813	8	135	15	262
144	0.0001753	6	135	18	264
145	0.0001713	41	163	17	285
146	0.0001779	3	131	18	259
147	0.0001887	86	191	19	296
148	0.0001799	18	155	18	292
149	0.0001822	22	150	17	278
150	0.000179	2	140	15	278
151	0.0001772	3	133	14	263
152	0.0001834	42	155	18	268
153	0.0001703	28	153	17	278
154	0.0001757	17	152	19	287
155	0.0001687	45	168	17	291
156	0.0001851	1	137	18	273
157	0.0001705	14	138	13	262
158	0.000184	1	127	12	253
159	0.0001753	45	163	19	281
160	0.0001828	44	155	15	266
161	0.0001892	0	138	18	276
162	0.0001727	44	166	19	288
163	0.0001806	41	165	17	289
164	0.000202	48	165	18	282
165	0.0001774	23	151	19	279
166	0.0001771	37	160	19	283
167	0.0001706	25	145	17	265
168	0.0001804	28	160	19	292
169	0.0001705	38	149	19	260
170	0.0002042	18	153	18	288
171	0.0001695	63	176	19	289
172	0.0001858	11	142	15	273
173	0.0001816	30	152	18	274
174	0.0001789	18	148	16	278
175	0.0001732	30	155	13	280
176	0.0001844	33	146	17	259
177	0.0001767	52	170	18	288
178	0.0001799	1	144	17	287
179	0.0001805	26	150	15	274
180	0.0001681	22	136	14	250
181	0.0001755	11	144	16	277
182	0.0001713	24	141	16	258
183	0.0002125	11	148	16	285
184	0.0001731	27	149	17	271
185	0.0001773	1	132	19	263
186	0.0001759	6	141	13	276
187	0.000173	7	127	15	247
188	0.0002049	58	178	18	298
189	0.0001692	72	183	19	294
190	0.0001687	28	141	16	254
191	0.000186	4	138	18	272
192	0.0001782	12	137	17	262
193	0.0001722	38	164	17	290
194	0.0001816	31	154	15	277
195	0.0001801	13	136	15	259
196	0.0001687	34	150	14	266
197	0.0001959	13	140	17	267
198	0.0001756	45	162	17	279
199	0.0001943	36	163	18	290
200	0.0001686	27	142	15	257
201	0.0001806	25	152	18	279
202	0.0001865	13	145	16	277
203	0.0001711	40	162	18	284
204	0.0001891	9	152	18	295
205	0.0002048	4	138	16	272
206	0.0001732	48	158	18	268
207	0.000172	41	161	16	281
208	0.0001704	41	152	16	263
209	0.0001669	55	170	19	285
210	0.000171	29	152	19	275
211	0.0001814	31	153	18	275
212	0.000174	37	154	17	271
213	0.0001795	25	156	19	287
214	0.0001743	24	154	16	284
215	0.0001765	13	142	13	271
216	0.0001702	20	143	15	266
217	0.0001737	24	144	15	264
218	0.0002173	22	142	14	262
219	0.0002039	21	156	19	291
220	0.000177	24	154	17	284
221	0.0001752	36	157	17	278
222	0.0001875	30	149	16	268
223	0.0001771	2	134	14	266
224	0.0001841	28	156	18	284
225	0.0001718	34	157	17	280
226	0.0001931	7	144	19	281
227	0.0001706	33	152	19	271
228	0.0001706	31	156	17	281
229	0.0001715	32	149	16	266
230	0.0001725	64	181	16	298
231	0.0001794	49	161	16	273
232	0.0001691	30	146	17	262
233	0.0001717	19	142	18	265
234	0.0001783	12	142	15	272
235	0.0001827	15	142	13	269
236	0.0001789	43	161	19	279
237	0.0001829	8	149	17	290
238	0.0001689	58	173	19	288
239	0.0001698	37	157	18	277
240	0.0001727	25	152	18	279
241	0.0001779	0	133	16	266
242	0.0001737	51	166	18	281
243	0.0001842	17	155	19	293
244	0.0002057	42	162	15	282
245	0.0001739	49	163	18	277
246	0.0001912	20	142	16	264
247	0.0002054	4	142	16	280
248	0.0001696	39	157	19	275
249	0.0001955	37	162	18	287
250	0.000185	26	152	16	278
251	0.0001764	8	135	15	262
252	0.0001761	80	189	19	298
253	0.0001716	43	156	19	269
254	0.0001894	19	151	18	283
255	0.0001844	3	146	17	289
256	0.00017	44	159	18	274
257	0.0001697	19	141	14	263
258	0.0001861	6	143	17	280
259	0.0001821	9	143	19	277
260	0.0002094	63	178	17	293
261	0.0001822	23	149	17	275
262	0.0001813	32	154	18	276
263	0.0001782	37	158	19	279
264	0.0001972	25	146	19	267
265	0.0001754	58	179	19	300
266	0.0001742	67	177	19	287
267	0.00017	53	174	18	295
268	0.0001713	36	153	15	270
269	0.0001746	12	135	17	258
270	0.0001839	20	147	16	274
271	0.0002178	2	144	16	286
272	0.0001817	67	177	17	287
273	0.0001724	23	144	17	265
274	0.0001799	17	153	15	289
275	0.0001907	1	131	17	261
276	0.0001812	6	144	16	282
277	0.0001692	40	151	19	262
278	0.0001769	48	162	18	276
279	0.0002069	20	155	19	290
280	0.0001697	47	172	19	297
281	0.0001741	30	159	17	288
282	0.0001981	29	158	17	287
283	0.0001639	56	164	19	272
284	0.0001725	28	152	18	276
285	0.000177	67	180	19	293
286	0.0001829	10	146	14	282
287	0.0001907	56	173	19	290
288	0.0001868	8	143	19	278
289	0.0001805	4	136	15	268
290	0.0001702	44	166	17	288
291	0.0002051	48	171	19	294
292	0.0001747	8	139	18	270
293	0.0001793	17	140	17	263
294	0.0001743	3	142	19	281
295	0.0001718	62	181	19	300
296	0.0001688	57	168	18	279
297	0.0001805	23	142	18	261
298	0.0001733	36	151	15	266
299	0.0001917	12	139	19	266
300	0.000178	4	136	17	268
301	0.0001932	11	133	17	255
302	0.0001756	9	138	15	267
303	0.0001735	2	129	17	256
304	0.0001785	33	154	19	275
305	0.000188	16	147	17	278
306	0.0002571	59	171	19	283
307	0.0001785	3	139	18	275
308	0.0001778	4	145	18	286
309	0.0001854	23	147	18	271
310	0.0001708	85	188	18	291
311	0.0001777	51	167	18	283
312	0.0001812	34	159	19	284
313	0.0001799	47	164	15	281
314	0.0002138	21	150	19	279
315	0.0001721	27	148	17	269
316	0.0001676	46	162	16	278
317	0.0002207	30	150	15	270
318	0.0001744	43	161	18	279
319	0.0001962	29	150	19	271
320	0.0001875	10	140	18	270
321	0.0001741	45	160	19	275
322	0.000175	19	148	16	277
323	0.0001772	17	146	19	275
324	0.0001742	12	135	19	258
325	0.0002048	3	128	16	253
326	0.0001773	39	168	18	297
327	0.0001854	1	128	15	255
328	0.0001749	9	142	16	275
329	0.0001888	51	164	19	277
330	0.0001812	3	130	13	257
331	0.0001828	16	141	14	266
332	0.0002158	42	161	17	280
333	0.0001766	13	142	19	271
334	0.0001726	37	159	16	281
335	0.0002222	28	147	18	266
336	0.0001863	12	143	16	274
337	0.0001738	7	139	16	271
338	0.0001765	16	148	19	280
339	0.0001697	50	166	18	282
340	0.0002136	23	143	17	263
341	0.000182	12	148	17	284
342	0.0001788	22	147	14	272
343	0.0001701	53	166	15	279
344	0.000177	11	143	19	275
345	0.0002033	54	164	18	274
346	0.0001731	24	148	18	272
347	0.0001739	51	161	19	271
348	0.0001691	12	140	15	268
349	0.0001752	40	166	16	292
350	0.0001689	49	169	19	289
351	0.0002006	43	164	17	285
352	0.0001798	12	142	17	272
353	0.0001821	8	141	15	274
354	0.0001752	22	152	16	282
355	0.0001705	23	141	17	259
356	0.000172	29	146	17	263
357	0.0001669	41	158	16	275
358	0.0001737	23	147	17	271
359	0.0002087	19	144	15	269
360	0.0001675	69	178	19	287
361	0.0001717	4	139	17	274
362	0.0001794	40	154	15	268
363	0.0001739	24	148	16	272
364	0.0001685	51	161	17	271
365	0.0001708	27	149	18	271
366	0.0001729	19	148	16	277
367	0.0001688	53	158	17	263
368	0.0001953	17	143	16	269
369	0.0001713	5	137	18	269
370	0.0001767	32	164	17	296
371	0.000177	6	142	19	278
372	0.0001894	43	160	15	277
373	0.0002066	27	158	16	289
374	0.0001759	73	188	18	303
375	0.0001737	17	146	16	275
376	0.0001752	48	166	19	284
377	0.0002046	44	164	19	284
378	0.0002083	5	129	15	253
379	0.0002291	6	143	19	280
380	0.0001801	7	144	18	281
381	0.0001745	52	167	19	282
382	0.0001663	48	157	17	266
383	0.0001728	51	172	19	293
384	0.0001762	24	145	15	266
385	0.0001788	40	162	18	284
386	0.0001771	12	136	13	260
387	0.0001713	22	135	14	248
388	0.0001793	27	155	17	283
389	0.0001846	5	137	15	269
390	0.0002023	8	139	18	270
391	0.000169	48	161	18	274
392	0.0001713	75	181	18	287
393	0.0001776	20	138	18	256
394	0.0002307	26	147	19	268
395	0.000171	26	143	15	260
396	0.0001739	22	147	17	272
397	0.0001726	38	155	17	272
398	0.0001767	54	167	18	280
399	0.0001794	9	141	17	273
400	0.0001809	49	161	17	273
401	0.0001735	28	157	16	286
402	0.0001743	25	148	19	271
403	0.0001739	21	151	14	281
404	0.0001668	54	167	19	280
405	0.0001727	31	150	18	269
406	0.0001761	43	166	15	289
407	0.0001898	10	140	15	270
408	0.0001722	28	152	19	276
409	0.0001827	41	156	17	271
410	0.0001895	11	135	14	259
411	0.0001873	12	135	19	258
412	0.000173	52	172	19	292
413	0.0001718	40	159	19	278
414	0.0001751	15	147	16	279
415	0.0001676	41	164	19	287
416	0.0001694	38	157	17	276
417	0.0001743	6	140	14	274
418	0.0002112	19	146	18	273
419	0.0001846	16	153	18	290
420	0.0001819	46	165	16	284
421	0.0001785	79	183	19	287
422	0.0001847	61	173	19	285
423	0.0002003	12	144	18	276
424	0.0001705	28	146	16	264
425	0.0001732	38	157	17	276
426	0.0001768	11	144	16	277
427	0.0001676	36	150	14	264
428	0.0001695	23	143	16	263
429	0.0001718	22	150	19	278
430	0.0001788	29	152	15	275
431	0.000183	7	148	17	289
432	0.0001754	24	150	18	276
433	0.0001725	26	144	19	262
434	0.0001761	37	157	18	277
435	0.0001782	1	133	19	265
436	0.0001862	3	132	13	261
437	0.0001833	23	148	18	273
438	0.0001737	12	143	17	274
439	0.0002276	12	140	18	268
440	0.0001731	1	132	18	263
441	0.0001769	9	138	15	267
442	0.0001743	17	136	17	255
443	0.0001662	65	174	19	283
444	0.0001709	15	141	15	267
445	0.0001694	8	134	14	260
446	0.0001749	15	142	17	269
447	0.0001745	10	137	13	264
448	0.0001738	15	147	16	279
449	0.0001719	35	155	15	275
450	0.000176	21	146	18	271
451	0.0001996	9	139	16	269
452	0.0001736	51	173	19	295
453	0.0001729	28	149	16	270
454	0.0001931	27	153	19	279
455	0.000173	41	159	17	277
456	0.0001744	14	147	18	280
457	0.0001742	19	145	17	271
458	0.0001896	46	158	19	270
459	0.000171	26	151	19	276
460	0.0001717	31	159	16	287
461	0.0001741	26	151	18	276
462	0.0001982	15	146	17	277
463	0.0001778	15	145	18	275
464	0.0001763	16	142	16	268
465	0.0001913	29	150	19	271
466	0.0001795	1	143	16	285
467	0.0001788	18	150	17	282
468	0.0001761	18	146	18	274
469	0.0001704	22	142	19	262
470	0.0001824	42	158	18	274
471	0.0001856	65	177	19	289
472	0.0001927	30	151	17	272
473	0.0001775	42	164	19	286
474	0.0001884	35	156	19	277
475	0.000172	3	127	13	251
476	0.0001891	29	152	18	275
477	0.0001676	47	167	19	287
478	0.0001935	4	139	16	274
479	0.0001773	0	137	16	274
480	0.000179	3	135	19	267
481	0.0001676	67	172	18	277
482	0.0002117	40	152	18	264
483	0.0001795	38	156	17	274
484	0.0001725	10	144	19	278
485	0.0001799	8	137	15	266
486	0.0001703	12	136	16	260
487	0.000186	6	139	14	272
488	0.0001764	40	155	18	270
489	0.0001703	13	137	17	261
490	0.0001795	47	169	19	291
491	0.0002745	41	158	17	275
492	0.0001743	8	138	19	268
493	0.0001676	53	176	19	299
494	0.0001734	30	152	18	274
495	0.0001802	32	158	16	284
496	0.0001864	35	161	18	287
497	0.0001657	34	154	16	274
498	0.0001773	8	150	18	292
499	0.000192	27	152	15	277
500	0.0001645	39	156	17	273
501	0.0002132	15	141	15	267
502	0.0001753	39	149	17	259
503	0.0001777	14	144	16	274
504	0.0001992	24	157	15	290
505	0.0001763	13	140	19	267
506	0.0001762	18	146	17	274
507	0.0001751	16	145	16	274
508	0.0001829	30	158	19	286
509	0.0001707	48	164	19	280
510	0.0002124	4	143	16	282
511	0.000188	44	160	16	276
512	0.0001732	42	153	18	264
513	0.0001783	1	126	18	251
514	0.0001813	47	162	16	277
515	0.0001727	39	164	19	289
516	0.0001697	62	176	18	290
517	0.0001718	62	171	16	280
518	0.0001721	11	141	18	271
519	0.0001723	24	149	16	274
520	0.0001792	34	158	19	282
521	0.000174	25	144	16	263
522	0.0002067	60	171	18	282
523	0.000176	31	153	15	275
524	0.0001816	8	135	16	262
525	0.000173	15	142	15	269
526	0.0001782	12	144	17	276
527	0.0001794	21	148	16	275
528	0.0001659	51	158	19	265
529	0.0001767	22	145	18	268
530	0.00018	19	151	17	283
531	0.000188	67	178	19	289
532	0.0001698	25	141	13	257
533	0.000173	41	153	19	265
534	0.0001699	55	167	19	279
535	0.0001719	4	135	15	266
536	0.0002012	30	159	19	288
537	0.0001898	15	136	14	257
538	0.0001888	32	148	18	264
539	0.0001805	1	142	16	283
540	0.0001751	55	168	17	281
541	0.0001703	29	143	15	257
542	0.0001736	19	147	18	275
543	0.0001711	59	168	19	277
544	0.0001736	11	144	18	277
545	0.0001742	12	143	15	274
546	0.0001839	1	129	15	257
547	0.0001717	22	149	17	276
548	0.0001743	24	148	16	272
549	0.0001725	37	156	16	275
550	0.0002233	19	138	17	257
551	0.0001837	45	164	18	283
552	0.0001726	30	151	16	272
553	0.0001858	18	142	17	266
554	0.0001866	1	141	19	281
555	0.000193	40	151	15	262
556	0.0002047	0	127	13	254
557	0.0001757	27	145	17	263
558	0.0001821	2	146	16	290
559	0.0001742	12	140	17	268
560	0.0001783	82	192	19	302
561	0.0001948	11	145	19	279
562	0.0001753	5	145	17	285
563	0.0001738	30	152	19	274
564	0.0001892	19	157	18	295
565	0.0001729	43	160	16	277
566	0.0001706	18	145	18	272
567	0.0001751	2	147	18	292
568	0.00018	3	132	15	261
569	0.0001722	10	143	16	276
570	0.0001711	23	147	18	271
571	0.0001677	90	192	19	294
572	0.0001757	35	157	19	279
573	0.0001999	35	156	19	277
574	0.0001775	60	175	19	290
575	0.0001763	20	152	18	284
576	0.0001787	21	152	17	283
577	0.000183	33	151	15	269
578	0.0002231	12	144	19	276
579	0.0001867	9	141	15	273
580	0.0001881	6	137	15	268
581	0.0001763	50	164	18	278
582	0.0001737	4	136	18	268
583	0.0001754	13	143	15	273
584	0.0001803	18	139	19	260
585	0.000185	19	141	16	263
586	0.0001867	49	167	19	285
587	0.0001689	19	142	14	265
588	0.0001695	30	146	14	262
589	0.0002112	18	139	15	260
590	0.0001807	32	148	14	264
591	0.0001987	8	149	16	290
592	0.0001687	48	163	15	278
593	0.0001794	60	170	18	280
594	0.0001785	8	135	19	262
595	0.0001811	9	134	14	259
596	0.0002086	38	165	17	292
597	0.0001699	57	174	19	291
598	0.0001696	20	144	19	268
599	0.0001731	17	148	19	279
600	0.0001995	46	167	18	288
601	0.000174	25	146	17	267
602	0.0001921	22	151	16	280
603	0.0001782	15	148	18	281
604	0.0001684	29	140	15	251
605	0.000173	17	139	16	261
606	0.0001728	0	132	18	264
607	0.0001687	15	136	16	257
608	0.0001711	23	143	14	263
609	0.0001731	62	169	19	276
610	0.0001725	45	171	18	297
611	0.0002183	10	142	18	274
612	0.0001767	12	149	19	286
613	0.0001659	60	168	17	276
614	0.0001715	52	163	18	274
615	0.00017	35	160	19	285
616	0.0001829	24	140	18	256
617	0.0001839	36	158	16	280
618	0.0001771	17	143	19	269
619	0.0002214	15	141	16	267
620	0.0002197	75	189	19	303
621	0.000184	27	149	18	271
622	0.0001791	29	160	15	291
623	0.0001818	54	169	17	284
624	0.0001776	26	153	14	280
625	0.0001735	19	151	18	283
626	0.0001761	5	136	17	267
627	0.0001973	32	152	19	272
628	0.0001755	6	138	16	270
629	0.0001833	7	140	16	273
630	0.0001701	20	144	17	268
631	0.0001663	69	181	19	293
632	0.000172	39	160	18	281
633	0.0001742	32	149	16	266
634	0.0001694	78	187	18	296
635	0.0001967	45	163	19	281
636	0.0001803	1	140	19	279
637	0.000169	34	143	17	252
638	0.000177	3	132	17	261
639	0.0001949	60	173	17	286
640	0.0001943	21	154	17	287
641	0.0001795	19	149	19	279
642	0.0002101	4	141	17	278
643	0.0001719	50	167	19	284
644	0.0001786	28	143	17	258
645	0.0001765	21	145	18	269
646	0.0001782	33	160	16	287
647	0.0001765	23	151	16	279
648	0.0001753	34	152	19	270
649	0.0001824	69	181	19	293
650	0.000176	64	172	17	280
651	0.0001729	33	154	17	275
652	0.0001951	14	134	14	254
653	0.0001794	71	176	17	281
654	0.0001938	23	150	15	277
655	0.0001748	38	163	16	288
656	0.0001755	16	141	17	266
657	0.0001888	34	156	18	278
658	0.0001719	35	155	15	275
659	0.0001688	40	158	15	276
660	0.0001684	30	153	18	276
661	0.0002028	55	174	18	293
662	0.0001882	26	158	16	290
663	0.0001878	46	163	19	280
664	0.0001944	6	143	17	280
665	0.0001798	19	139	19	259
666	0.0001796	45	161	19	277
667	0.0001801	39	161	18	283
668	0.000202	31	160	16	289
669	0.0001724	49	171	19	293
670	0.0002128	13	141	15	269
671	0.0001702	32	148	15	264
672	0.0001678	23	150	15	277
673	0.0001717	35	154	17	273
674	0.0001827	9	139	14	269
675	0.0001712	67	184	18	301
676	0.0001697	36	151	17	266
677	0.000174	26	151	18	276
678	0.0001812	29	152	17	275
679	0.000176	36	160	16	284
680	0.0001709	51	172	18	293
681	0.0002223	39	149	14	259
682	0.0002094	29	143	18	257
683	0.0001773	20	145	14	270
684	0.0001781	18	140	15	262
685	0.00017	63	176	19	289
686	0.0001864	5	134	16	263
687	0.0001792	43	163	18	283
688	0.0001811	21	148	19	275
689	0.0001734	54	169	18	284
690	0.0001732	16	141	15	266
691	0.0001718	32	149	15	266
692	0.0001772	0	137	14	274
693	0.0002172	24	152	15	280
694	0.0001766	28	149	19	270
695	0.0001783	27	152	17	277
696	0.0001856	28	147	17	266
697	0.0001729	33	158	18	283
698	0.0001725	26	144	19	262
699	0.0001704	9	132	15	255
700	0.0001714	3	131	15	259
701	0.000187	22	145	18	268
702	0.0001651	53	161	18	269
703	0.0004016	23	151	18	279
704	0.0001734	48	168	17	288
705	0.0001887	39	159	16	279
706	0.000214	24	153	17	282
707	0.000174	52	174	19	296
708	0.0001849	8	145	16	282
709	0.0001874	10	150	19	290
710	0.0001725	36	164	19	292
711	0.000225	34	157	18	280
712	0.0001718	29	156	19	283
713	0.0001728	31	153	18	275
714	0.0001801	17	147	19	277
715	0.0001744	21	141	18	261
716	0.0001769	30	146	17	262
717	0.0001701	31	151	18	271
718	0.0001694	42	165	16	288
719	0.0001737	21	146	17	271
720	0.0001894	33	162	19	291
721	0.0001687	38	155	19	272
722	0.0001758	60	172	19	284
723	0.0001783	39	156	18	273
724	0.0001758	17	145	19	273
725	0.0001874	29	153	17	277
726	0.0001766	5	141	17	277
727	0.000175	7	139	16	271
728	0.0001903	19	141	16	263
729	0.0001669	39	160	19	281
730	0.0001898	23	146	17	269
731	0.0001952	28	152	18	276
732	0.0002415	45	170	18	295
733	0.0001798	5	136	15	267
734	0.0001702	29	144	18	259
735	0.0001694	44	159	18	274
736	0.0001736	27	149	19	271
737	0.000171	19	142	14	265
738	0.0001751	19	150	17	281
739	0.0001741	6	133	17	260
740	0.0001767	47	162	18	277
741	0.0001683	42	163	19	284
742	0.000196	42	158	17	274
743	0.0001735	8	141	17	274
744	0.0001761	21	153	16	285
745	0.0001726	47	162	17	277
746	0.0001883	35	163	19	291
747	0.0001749	32	158	18	284
748	0.0001739	24	156	16	288
749	0.0001748	29	151	17	273
750	0.0001793	2	140	17	278
751	0.0001763	20	147	19	274
752	0.0001733	34	159	19	284
753	0.0002258	39	157	18	275
754	0.0002084	14	143	18	272
755	0.0001692	60	171	18	282
756	0.0001735	31	155	16	279
757	0.0001734	35	157	19	279
758	0.0001738	59	176	19	293
759	0.0001703	30	150	15	270
760	0.0001966	16	141	13	266
761	0.000176	19	149	17	279
762	0.0001737	7	136	16	265
763	0.0001772	52	159	18	266
764	0.0001794	3	142	16	281
765	0.0001807	32	153	18	274
766	0.0001777	30	162	18	294
767	0.0001747	12	151	19	290
768	0.000174	68	176	15	284
769	0.0001706	14	140	18	266
770	0.0001751	10	132	18	254
771	0.0001758	48	158	15	268
772	0.0001757	32	150	15	268
773	0.0001764	36	162	17	288
774	0.0001669	37	150	19	263
775	0.0001795	23	156	17	289
776	0.0002098	18	145	17	272
777	0.0001817	23	154	18	285
778	0.0001711	55	167	17	279
779	0.0001698	27	148	17	269
780	0.000169	45	159	17	273
781	0.0001801	15	137	16	259
782	0.0001879	41	164	17	287
783	0.0001803	30	155	17	280
784	0.0001743	24	147	15	270
785	0.0001729	44	163	18	282
786	0.0001865	19	146	18	273
787	0.0001761	2	138	14	274
788	0.0002724	31	156	18	281
789	0.0001717	18	139	15	260
790	0.0001861	39	155	18	271
791	0.0001779	6	134	15	262
792	0.0001682	37	154	18	271
793	0.0001694	60	183	19	306
794	0.0001699	39	157	19	275
795	0.0001635	55	163	17	271
796	0.0001717	23	147	19	271
797	0.0002071	8	138	18	268
798	0.0002024	54	168	18	282
799	0.0001762	18	152	19	286
800	0.0001779	29	145	19	261
801	0.0001761	5	129	19	253
802	0.0001756	15	141	14	267
803	0.0001729	39	166	19	293
804	0.0001678	6	133	18	260
805	0.0001746	18	144	18	270
806	0.0001681	43	157	19	271
807	0.0001785	10	142	18	274
808	0.0002166	37	157	18	277
809	0.0001954	52	163	19	274
810	0.000205	5	146	15	287
811	0.0001763	31	154	18	277
812	0.0001779	8	144	16	280
813	0.0001836	11	145	15	279
814	0.000178	51	168	19	285
815	0.0001894	26	146	15	266
816	0.0001681	17	139	16	261
817	0.0001798	7	135	13	263
818	0.0001734	3	134	17	265
819	0.0001725	53	171	18	289
820	0.0001727	22	143	17	264
821	0.000178	15	137	17	259
822	0.0001771	5	137	15	269
823	0.0001922	34	160	19	286
824	0.0002052	42	156	18	270
825	0.0001829	10	149	18	288
826	0.000168	67	180	19	293
827	0.0001958	15	143	16	271
828	0.0002089	0	125	14	250
829	0.0001802	11	143	14	275
830	0.000181	4	138	16	272
831	0.0001711	32	142	15	252
832	0.0001699	54	168	18	282
833	0.0001751	11	145	16	279
834	0.0001717	36	155	19	274
835	0.0001736	15	147	17	279
836	0.0001734	61	174	17	287
837	0.0001892	20	151	16	282
838	0.0001785	58	170	19	282
839	0.0002	18	149	17	280
840	0.0002246	48	160	18	272
841	0.0001917	34	159	18	284
842	0.0001828	2	138	16	274
843	0.0002012	6	140	16	274
844	0.0001882	53	164	18	275
845	0.0001754	37	158	18	279
846	0.0001692	41	160	18	279
847	0.0001746	22	143	18	264
848	0.0002228	12	138	15	264
849	0.0001814	8	146	19	284
850	0.0001762	0	133	17	266
851	0.0001668	71	183	19	295
852	0.0002143	55	165	18	275
853	0.0001721	4	139	14	274
854	0.0001749	40	155	19	270
855	0.0001719	16	140	17	264
856	0.0001742	46	164	17	282
857	0.0001696	39	159	15	279
858	0.0001719	47	166	18	285
859	0.0001711	64	186	19	308
860	0.0001777	7	134	18	261
861	0.0001744	22	142	14	262
862	0.0001788	32	163	16	294
863	0.0001812	72	189	19	306
864	0.0001727	21	151	18	281
865	0.0001711	68	176	19	284
866	0.0001776	32	161	17	290
867	0.0001816	10	148	19	286
868	0.000177	6	138	15	270
869	0.0001883	36	153	18	270
870	0.0001685	36	159	17	282
871	0.0001845	7	142	17	277
872	0.0001681	38	146	16	254
873	0.0001757	29	150	18	271
874	0.000181	13	139	15	265
875	0.0001655	40	151	16	262
876	0.0001979	14	150	16	286
877	0.0001864	42	161	18	280
878	0.0001817	11	135	17	259
879	0.000213	7	142	19	277
880	0.0001887	4	131	15	258
881	0.0001693	61	177	19	293
882	0.0002006	14	146	19	278
883	0.0001779	35	151	18	267
884	0.0001893	1	135	17	269
885	0.0001765	43	158	18	273
886	0.0001878	20	155	19	290
887	0.0002058	25	146	15	267
888	0.0001791	27	151	16	275
889	0.000192	61	181	17	301
890	0.00023	12	140	14	268
891	0.0001688	19	141	14	263
892	0.000176	24	143	16	262
893	0.0003165	43	158	17	273
894	0.0001768	26	150	17	274
895	0.0001678	86	195	19	304
896	0.0001787	45	157	19	269
897	0.0001765	25	151	19	277
898	0.0001672	28	151	19	274
899	0.0001671	44	156	17	268
900	0.0001662	59	168	18	277
901	0.0001924	30	152	19	274
902	0.0002032	5	141	19	277
903	0.0001735	22	147	17	272
904	0.0001731	21	145	18	269
905	0.0001738	3	139	18	275
906	0.0001687	27	151	17	275
907	0.0001705	54	169	17	284
908	0.0001699	46	157	19	268
909	0.0001769	19	148	18	277
910	0.0002657	27	155	16	283
911	0.0001801	57	174	17	291
912	0.00018	13	142	14	271
913	0.0001762	32	163	16	294
914	0.0001674	28	140	14	252
915	0.0001818	29	152	16	275
916	0.0001753	1	136	19	271
917	0.0001663	73	179	19	285
918	0.000184	2	137	16	272
919	0.0001737	1	139	14	277
920	0.0001811	13	146	19	279
921	0.0001839	3	131	17	259
922	0.0001731	9	140	15	271
923	0.0001702	50	171	18	292
924	0.0001735	23	152	18	281
925	0.0001707	34	155	17	276
926	0.0001786	16	144	16	272
927	0.00017	46	160	15	274
928	0.0001781	24	153	18	282
929	0.0001833	13	144	18	275
930	0.0001694	38	151	19	264
931	0.0001666	61	175	18	289
932	0.0001847	40	162	18	284
933	0.0001767	36	165	19	294
934	0.0001865	30	156	16	282
935	0.000176	10	143	15	276
936	0.0001735	46	160	14	274
937	0.0001739	32	155	17	278
938	0.0001775	16	148	19	280
939	0.0001688	22	150	17	278
940	0.0001709	27	147	16	267
941	0.0001792	60	176	18	292
942	0.000169	36	153	16	270
943	0.0001752	29	145	14	261
944	0.0001846	18	145	15	272
945	0.0001683	38	154	18	270
946	0.0001731	28	158	16	288
947	0.0001685	46	169	19	292
948	0.0001764	37	160	17	283
949	0.0001749	33	157	16	281
950	0.0001718	14	135	16	256
951	0.0001662	37	152	17	267
952	0.0001721	45	162	18	279
953	0.0001732	14	139	18	264
954	0.0001779	12	146	14	280
955	0.0001718	31	151	18	271
956	0.0001688	29	146	18	263
957	0.0001954	42	156	16	270
958	0.0001735	51	168	19	285
959	0.0001706	18	144	16	270
960	0.000172	4	134	17	264
961	0.0001711	40	154	17	268
962	0.0001741	19	143	15	267
963	0.0002045	12	140	15	268
964	0.000181	23	152	19	281
965	0.0001689	42	155	16	268
966	0.0002051	22	149	14	276
967	0.0001758	25	154	19	283
968	0.0001709	21	145	19	269
969	0.0001722	47	165	18	283
970	0.0001715	16	133	15	250
971	0.0002235	38	165	19	292
972	0.0001721	1	139	19	277
973	0.0001761	28	155	17	282
974	0.00018	25	158	19	291
975	0.0001697	26	153	17	280
976	0.0002089	9	135	17	261
977	0.0001673	34	152	18	270
978	0.0001701	53	164	19	275
979	0.0001674	41	151	17	261
980	0.0001755	6	130	13	254
981	0.0001896	76	186	19	296
982	0.0001702	14	145	18	276
983	0.0001744	18	155	18	292
984	0.0001738	66	179	19	292
985	0.0001731	33	158	17	283
986	0.0002061	13	143	15	273
987	0.0001721	23	158	18	293
988	0.0001776	7	135	18	263
989	0.0001829	46	172	17	298
990	0.0001706	24	146	15	268
991	0.0002217	14	144	17	274
992	0.0001793	36	157	17	278
993	0.0001715	39	156	18	273
994	0.0002206	58	178	19	298
995	0.000191	5	141	17	277
996	0.000191	2	144	17	286
997	0.000171	47	171	19	295
998	0.0001786	2	133	16	264
999	0.0002037	30	148	17	266
mean	0.000181604	28.294	151.807	17.072	275.32

## Sheet: GS_Opt
	time	SEq	Bal	Reg	Egal
0	0.0005672	9	140	15	269
1	0.000359	16	142	18	263
2	0.0003863	1	139	15	277
3	0.000356	8	141	15	274
4	0.0004222	3	140	18	277
5	0.0003446	27	155	17	281
6	0.0004368	8	144	18	280
7	0.0004455	26	158	17	278
8	0.0003582	37	161	19	285
9	0.0003711	19	140	18	261
10	0.0003614	15	147	18	279
11	0.0003962	46	164	17	281
12	0.0003524	2	136	13	265
13	0.0003797	21	153	16	285
14	0.0004169	9	144	17	278
15	0.0003699	24	144	19	264
16	0.000377	2	138	16	272
17	0.0003389	28	150	16	272
18	0.000368	6	140	15	272
19	0.000356	27	152	16	277
20	0.0003904	69	182	18	292
21	0.0003562	10	143	15	276
22	0.0003734	8	140	17	272
23	0.0003667	23	135	14	247
24	0.000348	44	160	16	275
25	0.0003585	10	148	19	286
26	0.0003546	3	129	15	255
27	0.0004261	51	172	19	293
28	0.000414	1	140	14	267
29	0.0003497	5	128	14	251
30	0.0003885	6	131	13	256
31	0.0003464	31	158	17	284
32	0.0003807	12	135	18	258
33	0.000348	21	143	18	265
34	0.0004255	10	143	15	276
35	0.0004129	36	152	17	268
36	0.0003538	57	173	18	289
37	0.0003532	0	133	17	266
38	0.000359	23	146	14	269
39	0.0003665	19	147	15	275
40	0.0003554	34	150	18	266
41	0.0003697	11	132	16	253
42	0.0003578	6	140	17	274
43	0.0003715	11	139	15	267
44	0.0004083	22	147	18	272
45	0.0003783	30	150	19	270
46	0.0004119	21	144	18	267
47	0.0003655	2	139	15	276
48	0.000349	32	150	15	268
49	0.000349	24	151	15	276
50	0.0003734	18	145	18	272
51	0.0003999	19	150	18	279
52	0.0003812	21	144	17	267
53	0.000352	12	143	17	273
54	0.0003496	38	157	16	276
55	0.0004205	5	137	17	269
56	0.0003544	11	146	17	281
57	0.0003725	9	142	16	273
58	0.0003532	11	133	13	255
59	0.0003588	22	143	15	260
60	0.00037	6	144	17	282
61	0.0003579	22	141	15	260
62	0.0003788	31	153	16	270
63	0.0003921	29	152	18	275
64	0.0003663	28	155	19	282
65	0.0003588	21	148	18	275
66	0.0003418	3	129	17	255
67	0.0004112	55	174	17	288
68	0.000344	14	148	19	282
69	0.0003879	13	149	17	285
70	0.0003876	13	142	16	271
71	0.000356	41	165	17	282
72	0.0003944	12	150	17	288
73	0.0003554	39	148	16	257
74	0.0003612	5	140	18	275
75	0.0004074	9	139	17	267
76	0.0003599	20	147	18	274
77	0.000396	28	152	19	276
78	0.0003615	21	148	18	275
79	0.0003542	11	147	18	282
80	0.0003501	22	141	14	260
81	0.0003586	37	162	17	286
82	0.0003765	18	146	19	274
83	0.0004062	12	139	16	266
84	0.0003652	29	154	13	279
85	0.0003609	36	164	18	292
86	0.0003689	19	133	15	247
87	0.0003887	18	150	16	278
88	0.00039	26	152	19	278
89	0.0003551	2	136	13	266
90	0.0003802	23	150	17	277
91	0.0003762	14	138	16	260
92	0.0004083	23	155	19	287
93	0.000365	35	159	18	272
94	0.0003798	27	148	14	269
95	0.0003719	48	168	16	287
96	0.0004192	1	139	18	277
97	0.0003631	37	157	18	277
98	0.0003554	10	147	18	279
99	0.0003662	4	134	15	264
100	0.0003749	15	144	15	273
101	0.0003582	22	148	15	270
102	0.0003445	32	156	18	280
103	0.0003946	31	154	18	276
104	0.0003834	31	161	18	283
105	0.0003798	2	134	17	264
106	0.0003724	15	151	18	287
107	0.0005615	6	136	17	266
108	0.0003581	15	141	17	267
109	0.0003812	38	164	16	290
110	0.000383	20	149	18	277
111	0.0003572	43	167	18	287
112	0.0003972	7	142	14	277
113	0.0003829	27	147	15	267
114	0.0003938	29	156	16	283
115	0.0003724	26	150	16	274
116	0.0003776	22	143	15	264
117	0.0003851	4	139	15	274
118	0.0003574	14	143	13	270
119	0.0003584	26	144	14	260
120	0.0003461	23	143	16	263
121	0.0003712	10	139	16	268
122	0.0003517	19	142	17	265
123	0.0003834	2	127	17	252
124	0.0004072	8	143	19	278
125	0.0003718	2	127	13	252
126	0.0003719	6	138	14	270
127	0.0003813	29	154	16	279
128	0.0003952	34	154	18	274
129	0.0003679	15	148	17	280
130	0.0004297	12	138	15	264
131	0.000399	3	130	16	257
132	0.0003601	23	155	15	287
133	0.000344	35	149	17	260
134	0.0003842	15	148	17	281
135	0.0003771	2	137	16	272
136	0.0003955	11	137	14	263
137	0.0003461	21	136	18	251
138	0.0003615	39	162	18	285
139	0.0003531	9	138	15	267
140	0.0003647	15	138	14	261
141	0.0003639	10	142	17	268
142	0.0003606	12	146	16	280
143	0.0003574	8	135	14	262
144	0.0003485	6	135	18	264
145	0.0003744	10	142	16	274
146	0.000362	3	131	18	259
147	0.000401	36	166	17	296
148	0.0003724	18	155	17	288
149	0.0003675	22	150	17	278
150	0.0003855	2	140	15	278
151	0.0003669	3	133	14	259
152	0.0003598	42	155	18	268
153	0.0003623	28	153	16	278
154	0.0003805	17	147	16	269
155	0.0003557	45	168	17	291
156	0.0003902	1	137	18	273
157	0.0003544	9	138	13	262
158	0.0003704	1	127	12	253
159	0.0003516	43	159	19	275
160	0.0003676	12	141	15	266
161	0.0004309	0	138	18	272
162	0.0003556	19	148	17	277
163	0.0003525	41	165	17	289
164	0.0004094	48	165	17	282
165	0.000352	23	151	18	277
166	0.000353	37	160	18	283
167	0.0003669	15	144	17	265
168	0.0003974	18	157	19	292
169	0.000371	30	149	19	260
170	0.000393	18	153	17	281
171	0.0003645	39	159	17	279
172	0.0003743	11	142	13	273
173	0.00037	23	146	15	269
174	0.0003589	18	148	16	278
175	0.0003568	30	155	13	280
176	0.000363	33	146	17	259
177	0.0003695	22	149	14	276
178	0.0003586	1	144	17	286
179	0.0003747	26	150	15	274
180	0.0003677	1	128	14	250
181	0.0003721	11	144	16	277
182	0.000389	15	139	16	258
183	0.0003889	11	148	16	285
184	0.0003688	27	149	17	264
185	0.0003543	1	132	18	258
186	0.0003494	6	141	13	274
187	0.0003573	7	127	15	247
188	0.0004017	29	164	18	298
189	0.000435	38	153	17	268
190	0.0004008	17	132	16	247
191	0.0003665	4	138	18	272
192	0.00036	12	137	17	262
193	0.0003788	38	164	16	286
194	0.0004049	31	154	15	277
195	0.0003743	13	136	15	259
196	0.0003528	34	150	14	266
197	0.0003703	13	140	17	265
198	0.0003807	19	148	16	277
199	0.0003688	36	161	14	277
200	0.0003446	15	139	15	257
201	0.0003638	25	150	18	273
202	0.0003867	13	145	16	277
203	0.0003559	40	162	18	284
204	0.0003842	9	152	18	290
205	0.0003886	4	138	16	272
206	0.0003537	12	137	14	262
207	0.0003525	38	158	16	278
208	0.000399	40	152	16	263
209	0.0003482	25	149	16	273
210	0.000355	17	143	19	269
211	0.0003617	17	143	16	269
212	0.0003609	31	154	17	271
213	0.0003606	25	156	17	279
214	0.0003712	24	154	16	284
215	0.0003759	13	142	13	271
216	0.0003691	20	143	15	266
217	0.0003607	24	144	15	264
218	0.0003994	17	140	14	262
219	0.000401	21	156	16	284
220	0.0003506	24	154	17	282
221	0.0003645	14	145	17	276
222	0.0003636	5	134	16	263
223	0.0003511	2	134	14	266
224	0.0003675	28	156	18	284
225	0.000347	34	157	17	279
226	0.0003692	7	144	19	281
227	0.0003503	2	133	18	264
228	0.0003567	31	156	17	281
229	0.0003495	32	149	15	263
230	0.0003483	43	162	14	281
231	0.0003796	38	159	16	273
232	0.0003693	14	145	17	262
233	0.0003587	19	142	18	265
234	0.0003693	12	142	15	272
235	0.000379	4	136	13	268
236	0.0003592	43	161	18	276
237	0.0003643	8	149	17	280
238	0.000373	18	149	16	280
239	0.0003548	9	135	17	261
240	0.0003622	22	152	16	279
241	0.0003889	0	133	16	266
242	0.0003534	51	166	18	281
243	0.0003863	17	152	19	284
244	0.0003956	19	146	15	273
245	0.0004056	4	132	15	260
246	0.0003853	14	139	16	264
247	0.000446	4	142	16	280
248	0.0003618	13	141	15	269
249	0.0003735	37	162	18	287
250	0.000369	18	146	16	274
251	0.000359	8	135	15	262
252	0.0003876	10	150	19	290
253	0.0003497	5	131	15	257
254	0.0003686	19	151	15	277
255	0.0003985	3	146	17	289
256	0.0003727	17	144	17	271
257	0.0003538	18	141	14	263
258	0.0003651	6	143	17	267
259	0.0003758	9	142	18	270
260	0.000421	27	153	16	279
261	0.0003593	23	149	17	275
262	0.0003634	26	143	18	260
263	0.0003856	13	141	17	269
264	0.0003798	25	146	18	267
265	0.0003577	57	171	19	285
266	0.0003686	44	162	18	280
267	0.0003656	25	157	17	289
268	0.0003447	36	153	15	270
269	0.0003564	12	135	17	258
270	0.0003902	20	147	16	274
271	0.0004066	2	144	16	286
272	0.0003723	13	143	16	273
273	0.0003627	19	137	17	255
274	0.00038	17	153	15	289
275	0.0004578	1	131	17	261
276	0.0003564	6	144	16	282
277	0.0003625	7	137	18	262
278	0.0003776	27	150	17	273
279	0.0003798	20	155	18	274
280	0.0003691	47	172	19	297
281	0.0003551	30	159	17	288
282	0.000394	6	143	17	280
283	0.0003622	26	139	16	252
284	0.0003639	28	152	16	274
285	0.0003586	32	155	19	278
286	0.0003773	10	146	14	278
287	0.0003679	51	166	17	281
288	0.0003778	8	143	18	278
289	0.0003553	4	136	15	268
290	0.0003847	13	150	17	287
291	0.0004195	37	160	19	283
292	0.0003748	8	139	18	270
293	0.0003452	17	140	17	260
294	0.0003551	3	142	19	281
295	0.000367	34	158	17	282
296	0.0003668	35	159	17	279
297	0.0003596	23	142	17	261
298	0.0003869	15	142	15	266
299	0.000381	12	139	18	266
300	0.0003824	4	136	17	268
301	0.0003951	11	133	17	255
302	0.0003548	9	138	15	266
303	0.0003496	2	129	17	256
304	0.0003778	10	146	16	275
305	0.0003821	3	139	17	275
306	0.0004472	59	171	19	283
307	0.0003816	3	139	18	275
308	0.0003652	4	145	18	286
309	0.0003619	23	147	18	271
310	0.0003693	16	149	18	282
311	0.0003567	50	163	18	276
312	0.0003652	34	159	18	284
313	0.0003871	33	157	15	281
314	0.000401	21	150	19	279
315	0.000351	27	148	17	269
316	0.0004067	40	153	15	266
317	0.0004284	30	150	15	270
318	0.0003613	12	143	18	274
319	0.0003788	29	150	18	271
320	0.000367	10	137	18	262
321	0.0003441	42	160	18	275
322	0.0003557	14	138	15	262
323	0.0003808	17	146	19	275
324	0.0003486	12	135	15	252
325	0.0004006	3	128	16	251
326	0.0003804	30	153	16	276
327	0.000385	1	128	15	255
328	0.0003528	6	142	16	275
329	0.0003778	0	132	19	264
330	0.0003572	3	130	13	257
331	0.0003937	16	141	14	265
332	0.0004093	5	143	17	280
333	0.0003643	13	142	19	271
334	0.0003612	30	159	16	281
335	0.0004032	24	147	18	266
336	0.0003636	12	143	15	274
337	0.0003483	7	139	16	271
338	0.0003707	16	148	19	277
339	0.0003566	14	144	17	274
340	0.0004359	1	136	17	263
341	0.0003903	12	148	17	284
342	0.0003617	2	138	14	272
343	0.0003689	36	159	15	279
344	0.0003772	1	137	19	273
345	0.0004102	32	158	18	274
346	0.0003593	24	148	18	263
347	0.0003592	21	146	17	271
348	0.0003588	8	139	15	268
349	0.0003684	17	155	16	292
350	0.0003548	39	164	19	289
351	0.0003918	37	162	17	285
352	0.0003612	12	142	17	272
353	0.0003613	8	141	14	272
354	0.0003596	22	152	16	276
355	0.0003467	23	141	17	259
356	0.0003792	29	146	17	263
357	0.0003464	17	148	16	275
358	0.0003569	23	147	16	271
359	0.0004039	19	144	15	269
360	0.0003557	33	153	16	273
361	0.0003497	4	139	17	274
362	0.000367	17	144	15	268
363	0.0003568	24	148	16	272
364	0.0003693	29	152	15	271
365	0.0003502	27	149	17	271
366	0.0003714	19	148	16	275
367	0.000355	11	136	14	261
368	0.0004008	10	142	16	269
369	0.0003558	5	137	18	269
370	0.0003606	32	164	17	292
371	0.0003629	6	142	19	274
372	0.0003726	43	160	15	277
373	0.0004017	27	158	16	288
374	0.0003574	59	178	17	297
375	0.0003506	17	146	16	275
376	0.0003644	26	157	19	284
377	0.0004127	10	141	16	272
378	0.0003969	5	129	15	253
379	0.0004239	6	143	19	277
380	0.0003758	7	144	18	281
381	0.0003607	35	153	18	271
382	0.0003909	17	142	15	266
383	0.0003704	18	147	16	276
384	0.0003688	10	140	15	266
385	0.0003816	19	144	18	269
386	0.0003596	12	136	13	260
387	0.0003549	6	130	14	248
388	0.0003662	27	155	17	283
389	0.0003696	5	137	15	269
390	0.0004338	8	139	18	266
391	0.0003964	10	139	16	268
392	0.0003496	50	165	18	280
393	0.0003551	20	138	18	256
394	0.0004118	24	147	17	268
395	0.0003515	0	130	13	260
396	0.0003649	22	147	17	272
397	0.0003504	7	135	15	263
398	0.0003808	22	149	18	276
399	0.0003628	9	141	17	273
400	0.00037	2	131	14	260
401	0.0003779	28	157	16	285
402	0.0003486	25	148	18	271
403	0.0003596	6	141	14	276
404	0.0003623	51	163	16	275
405	0.0003474	31	150	16	269
406	0.0003673	43	166	15	288
407	0.0003621	10	140	15	270
408	0.0003676	28	152	18	276
409	0.0003654	29	150	17	271
410	0.0004144	11	135	14	259
411	0.0003666	12	135	14	257
412	0.0003725	15	145	14	275
413	0.0003629	30	158	18	278
414	0.0003758	15	147	16	279
415	0.0003439	41	164	18	282
416	0.0003543	38	157	17	276
417	0.0003693	6	140	14	274
418	0.0004132	19	146	17	273
419	0.0003636	16	153	18	289
420	0.0003649	46	165	16	284
421	0.0003719	16	142	19	268
422	0.0003941	54	172	18	285
423	0.0003827	12	144	14	265
424	0.0004108	19	146	16	264
425	0.0003568	28	155	17	276
426	0.000368	11	144	16	277
427	0.0003528	36	150	14	264
428	0.0003497	17	143	16	263
429	0.0003623	22	150	19	278
430	0.0003819	27	147	15	267
431	0.0003632	7	148	17	285
432	0.0003616	24	150	18	276
433	0.0003558	26	144	18	262
434	0.0003764	7	137	15	267
435	0.0003877	1	133	16	265
436	0.0003723	3	132	13	261
437	0.0003676	23	148	15	273
438	0.0004127	12	143	17	274
439	0.0004122	12	140	18	255
440	0.0003646	1	132	18	263
441	0.000381	9	138	15	267
442	0.0003813	2	133	17	255
443	0.000361	15	144	18	273
444	0.0003613	15	141	15	267
445	0.0004516	6	134	14	260
446	0.0003821	15	142	17	269
447	0.0003537	10	137	13	264
448	0.0003471	15	147	15	272
449	0.00036	8	139	15	270
450	0.0003638	14	145	18	271
451	0.0003782	9	139	16	269
452	0.0003734	8	145	17	282
453	0.0003886	21	144	16	267
454	0.0003699	27	153	17	279
455	0.0003661	24	151	17	277
456	0.0004173	14	147	17	280
457	0.0003679	19	145	17	271
458	0.0004047	10	137	15	264
459	0.0003858	1	139	16	276
460	0.0003839	25	146	15	267
461	0.0004039	12	142	18	272
462	0.0003863	12	146	17	277
463	0.000353	15	144	17	262
464	0.0003777	16	142	16	268
465	0.000369	29	150	17	271
466	0.0003641	1	143	16	285
467	0.0003572	18	150	17	282
468	0.0003525	18	146	17	274
469	0.0003433	22	142	19	262
470	0.0003687	21	149	17	274
471	0.0003684	25	154	18	283
472	0.0003836	22	144	16	266
473	0.0003652	37	161	19	285
474	0.0003801	18	140	14	262
475	0.000364	3	127	13	251
476	0.0003741	29	152	17	275
477	0.0003464	47	167	18	287
478	0.0003766	4	139	16	273
479	0.0003597	0	137	16	273
480	0.0003683	3	135	16	263
481	0.0003508	20	138	15	256
482	0.0003999	0	136	18	264
483	0.0003696	27	148	17	269
484	0.0003667	10	144	19	272
485	0.0003667	8	137	15	266
486	0.000358	12	136	16	260
487	0.0003574	6	139	14	272
488	0.0003575	13	145	16	270
489	0.00035	13	137	14	259
490	0.0003685	42	158	18	274
491	0.00046	41	158	17	275
492	0.0004753	8	138	19	264
493	0.0003739	52	172	19	292
494	0.0003562	15	145	17	274
495	0.0003604	32	157	16	276
496	0.0003738	27	149	16	271
497	0.0003488	6	142	16	274
498	0.0003718	8	150	18	292
499	0.0004092	16	144	14	272
500	0.0003436	39	156	17	273
501	0.0004344	3	138	15	267
502	0.0003704	22	143	17	259
503	0.0003622	14	144	16	272
504	0.0003776	24	157	15	290
505	0.0003741	13	140	19	267
506	0.000357	2	138	17	274
507	0.0003545	16	145	16	274
508	0.0003692	2	146	19	286
509	0.0003676	8	137	16	266
510	0.0004073	4	143	16	282
511	0.0003682	6	141	16	276
512	0.0003873	29	145	16	261
513	0.0003635	1	126	18	251
514	0.0004075	2	135	15	268
515	0.0003581	39	164	19	280
516	0.0003511	50	166	16	282
517	0.0003527	4	135	14	266
518	0.0003606	11	141	16	263
519	0.0003459	6	137	13	268
520	0.0005607	25	158	18	282
521	0.0003735	10	133	14	256
522	0.0004292	2	140	15	278
523	0.0003638	31	153	15	275
524	0.0003573	8	135	16	262
525	0.0003755	15	142	15	269
526	0.0003945	12	144	17	274
527	0.0003627	21	148	16	275
528	0.0003877	30	148	18	265
529	0.0003647	22	145	18	266
530	0.0003901	14	148	17	282
531	0.0003762	7	140	17	273
532	0.0003691	10	135	13	257
533	0.0003629	22	146	17	265
534	0.000377	17	148	16	279
535	0.0003552	4	135	15	266
536	0.0003879	1	140	19	279
537	0.0003821	15	136	14	255
538	0.0004346	32	148	18	259
539	0.0003675	1	142	16	283
540	0.0003665	41	164	17	281
541	0.0003966	4	133	15	257
542	0.0003537	19	147	18	275
543	0.0004005	30	158	16	277
544	0.0003655	11	144	18	277
545	0.0003966	12	143	15	270
546	0.0004126	1	129	15	257
547	0.000361	22	149	17	276
548	0.0003629	15	141	16	267
549	0.0003714	37	155	16	272
550	0.0004101	19	138	17	257
551	0.0003707	45	164	18	283
552	0.0003612	30	151	16	268
553	0.0003748	18	142	17	266
554	0.0003865	1	141	19	275
555	0.0003823	20	144	15	262
556	0.0004366	0	127	13	254
557	0.0003673	22	140	17	258
558	0.0004025	2	146	16	290
559	0.0003672	12	140	16	268
560	0.000392	4	138	16	272
561	0.0003841	11	145	19	279
562	0.0003651	5	145	17	278
563	0.0003652	14	141	18	268
564	0.0003863	19	157	18	289
565	0.0003549	34	160	16	277
566	0.0003753	13	143	18	272
567	0.0003606	2	147	18	284
568	0.0003548	3	132	15	261
569	0.000362	10	143	15	271
570	0.0003614	13	137	15	261
571	0.0003575	33	161	19	289
572	0.0003882	4	137	17	270
573	0.0004178	35	156	18	273
574	0.000376	29	158	19	287
575	0.0003655	20	152	18	284
576	0.0003754	21	152	17	283
577	0.0003963	19	145	15	269
578	0.0004034	12	144	19	276
579	0.0003883	9	141	15	273
580	0.0004121	6	137	15	268
581	0.0003558	34	148	18	262
582	0.000361	4	136	18	268
583	0.0003566	12	137	15	262
584	0.0003572	18	139	19	260
585	0.0003674	19	141	16	263
586	0.0003979	22	150	17	278
587	0.0003588	19	142	14	265
588	0.0003643	28	146	14	262
589	0.0004069	18	139	15	260
590	0.0003986	29	148	14	264
591	0.0003852	8	149	16	290
592	0.0003454	23	149	15	275
593	0.0003642	47	160	18	273
594	0.0003933	8	135	19	262
595	0.0003556	9	134	14	259
596	0.0004174	17	153	16	289
597	0.0003595	24	151	17	278
598	0.0003507	20	144	19	265
599	0.0003861	17	148	17	274
600	0.0004105	9	150	18	288
601	0.0003621	25	146	17	267
602	0.0003785	22	148	16	265
603	0.0003578	15	148	18	281
604	0.0003572	29	140	15	249
605	0.0003684	15	139	16	261
606	0.0003633	0	132	17	264
607	0.0004157	15	136	16	257
608	0.0004272	23	143	14	263
609	0.0003596	43	166	19	276
610	0.0004025	45	171	18	289
611	0.0004184	10	142	18	268
612	0.0003721	2	144	19	286
613	0.0004112	13	149	17	276
614	0.0004104	18	151	18	274
615	0.0003815	11	146	17	281
616	0.0003806	19	140	18	256
617	0.0003805	26	158	16	280
618	0.0003766	17	143	19	267
619	0.0004133	6	136	15	266
620	0.0004063	65	180	19	295
621	0.0003638	25	149	18	271
622	0.0003578	29	160	15	284
623	0.0003641	13	147	16	281
624	0.0003547	26	153	14	272
625	0.0003894	16	147	18	278
626	0.0003681	5	136	17	259
627	0.000397	5	138	19	271
628	0.0003977	6	138	16	270
629	0.0003742	7	140	16	273
630	0.0003628	20	144	17	268
631	0.000351	26	157	18	288
632	0.0003813	2	143	18	281
633	0.0003667	29	148	16	266
634	0.000345	51	174	18	296
635	0.0004039	1	138	17	275
636	0.0004043	1	140	19	278
637	0.0003457	16	134	17	252
638	0.0003887	3	132	17	261
639	0.000389	11	148	16	285
640	0.0003826	5	147	17	287
641	0.0003717	19	149	18	279
642	0.000409	4	141	17	273
643	0.0003539	28	157	19	284
644	0.0004046	6	131	15	256
645	0.000355	21	145	17	266
646	0.0003871	9	137	16	265
647	0.0003539	23	151	16	279
648	0.0003777	34	152	16	264
649	0.0003767	43	166	15	289
650	0.000383	0	139	17	278
651	0.0004015	33	153	17	269
652	0.0003877	14	134	14	254
653	0.0003866	56	164	17	272
654	0.0003952	23	150	15	277
655	0.0003714	14	145	16	276
656	0.0003489	16	141	14	261
657	0.0004055	34	156	18	278
658	0.000368	17	143	15	269
659	0.0003717	7	144	15	276
660	0.0003708	30	153	17	276
661	0.000405	45	162	18	279
662	0.0003734	26	158	16	286
663	0.0003749	19	146	17	273
664	0.0003837	5	143	17	280
665	0.000355	19	139	19	259
666	0.000376	3	136	18	269
667	0.0003665	39	156	16	273
668	0.000391	31	160	16	289
669	0.0003513	9	143	15	277
670	0.0003971	13	141	15	269
671	0.0003556	25	148	15	264
672	0.0003834	23	150	15	277
673	0.0003525	23	145	17	267
674	0.0003689	9	139	14	269
675	0.000398	39	163	18	287
676	0.0003536	7	134	16	261
677	0.0003801	6	140	15	274
678	0.0003704	28	150	17	272
679	0.0003734	32	156	16	280
680	0.0003531	15	147	18	279
681	0.0004133	39	149	14	259
682	0.0003974	4	126	13	248
683	0.0003664	3	135	14	267
684	0.0003849	18	140	15	262
685	0.0003604	15	143	17	271
686	0.0003719	5	134	16	263
687	0.0003684	43	163	18	283
688	0.0003962	21	148	18	272
689	0.0003704	30	156	18	282
690	0.0003474	16	141	15	266
691	0.0003825	6	135	15	264
692	0.0003724	0	137	14	274
693	0.000393	24	152	15	280
694	0.0003797	28	149	18	263
695	0.000384	3	139	17	275
696	0.0003753	9	136	15	263
697	0.0003799	10	143	16	276
698	0.0003599	26	144	18	262
699	0.0003886	9	132	15	255
700	0.0003517	3	131	15	259
701	0.000381	12	138	16	264
702	0.0003553	8	132	16	256
703	0.000589	23	151	18	279
704	0.000349	48	168	17	288
705	0.0004177	39	159	16	279
706	0.0003913	24	146	17	265
707	0.0003732	8	151	17	294
708	0.0003907	8	145	16	273
709	0.0003664	10	150	19	288
710	0.0004542	21	148	15	275
711	0.0003976	34	157	17	280
712	0.0003589	3	141	19	279
713	0.0003544	15	146	18	275
714	0.0003941	17	147	19	277
715	0.0003616	21	141	18	261
716	0.0003662	30	146	17	262
717	0.0003615	27	143	17	259
718	0.0003583	42	165	16	288
719	0.0003675	21	146	17	268
720	0.0003798	33	162	19	290
721	0.0003474	8	139	19	270
722	0.0003614	9	138	17	267
723	0.0003674	11	142	18	273
724	0.0003546	14	141	17	268
725	0.0003959	3	135	17	267
726	0.0003698	4	138	17	272
727	0.0003526	7	139	16	271
728	0.0003939	19	141	16	263
729	0.0003543	15	142	15	269
730	0.0003839	2	139	17	269
731	0.0003716	28	152	18	276
732	0.000441	45	168	16	278
733	0.0003745	5	136	15	267
734	0.0003703	29	144	18	259
735	0.0003553	8	135	18	262
736	0.0004092	27	149	18	271
737	0.0003539	19	142	14	265
738	0.0003753	19	150	17	281
739	0.0003657	6	133	17	260
740	0.0003653	47	159	18	270
741	0.0003893	42	163	16	284
742	0.0003934	4	141	17	274
743	0.0003553	8	141	17	268
744	0.0003711	21	153	16	284
745	0.0004041	17	150	17	277
746	0.0003924	29	154	16	279
747	0.0003578	5	142	15	279
748	0.0003638	12	147	16	282
749	0.0003772	29	151	17	273
750	0.00036	2	140	17	278
751	0.0003527	20	147	19	274
752	0.0003544	8	140	19	272
753	0.0004053	39	157	16	275
754	0.0004163	13	143	18	272
755	0.0003579	58	167	18	276
756	0.0004035	13	141	16	269
757	0.0003848	35	157	19	279
758	0.0003595	4	145	19	286
759	0.0003413	30	150	15	270
760	0.00042	16	141	13	266
761	0.0004336	19	149	17	279
762	0.0003706	7	136	16	265
763	0.0003566	31	145	14	259
764	0.0003783	3	142	16	281
765	0.0003861	10	142	18	274
766	0.0003727	30	162	18	294
767	0.0003581	12	151	18	276
768	0.0004195	45	162	15	279
769	0.000351	14	140	17	262
770	0.0003637	10	132	18	254
771	0.0003953	18	139	14	260
772	0.0003717	32	150	15	268
773	0.000389	11	152	17	288
774	0.0003901	8	133	18	258
775	0.0003905	23	154	17	273
776	0.0003943	18	145	17	268
777	0.0003567	23	152	18	279
778	0.0003715	24	153	17	279
779	0.000358	27	148	17	269
780	0.0003462	39	157	16	273
781	0.0003574	15	137	16	259
782	0.0003639	20	150	17	280
783	0.0003665	14	148	17	280
784	0.0003892	4	140	15	270
785	0.0003675	33	159	17	282
786	0.0003641	19	146	18	273
787	0.0003553	2	138	14	273
788	0.0004884	6	138	15	270
789	0.0003664	18	139	15	260
790	0.0003823	15	141	14	267
791	0.0003655	6	134	15	262
792	0.0003689	12	141	16	270
793	0.0003539	41	164	17	287
794	0.0003684	30	154	19	275
795	0.0003587	18	144	17	270
796	0.0003637	23	139	17	254
797	0.0004065	2	135	17	268
798	0.0003787	54	168	18	282
799	0.000403	18	152	18	277
800	0.0003645	29	145	18	261
801	0.0003884	5	129	19	248
802	0.0003565	15	141	14	267
803	0.000371	14	154	19	293
804	0.0003839	6	133	18	260
805	0.0003618	18	144	18	270
806	0.0003419	30	142	18	254
807	0.000384	10	142	18	274
808	0.0004091	29	148	17	267
809	0.0003759	10	137	17	264
810	0.0004088	5	146	15	287
811	0.0003833	31	154	18	277
812	0.0003708	8	144	16	276
813	0.0003624	11	145	15	276
814	0.0003725	1	141	15	281
815	0.0003856	26	146	15	266
816	0.0003569	17	139	16	261
817	0.0003725	7	135	13	263
818	0.0003481	3	134	17	265
819	0.0003547	48	163	16	278
820	0.0003527	22	143	16	264
821	0.0003444	15	137	17	259
822	0.0003488	5	137	15	269
823	0.000382	34	160	17	278
824	0.0004023	24	144	17	264
825	0.0003705	10	149	15	285
826	0.0003549	45	166	17	287
827	0.000374	15	139	16	261
828	0.000431	0	125	14	250
829	0.0003746	11	143	14	275
830	0.0003762	4	138	16	272
831	0.0003534	7	133	14	252
832	0.0003503	48	159	16	270
833	0.0003483	11	145	16	279
834	0.000356	36	155	18	274
835	0.0003649	15	147	17	279
836	0.0003459	54	163	17	272
837	0.0003795	3	138	16	273
838	0.0003756	20	147	18	274
839	0.0003814	18	149	17	280
840	0.0004114	12	147	18	272
841	0.0003859	25	151	18	277
842	0.0003702	2	138	16	274
843	0.0004011	6	140	16	274
844	0.0003994	30	155	18	275
845	0.0003512	37	158	17	279
846	0.0003593	16	147	18	278
847	0.0003616	2	129	16	256
848	0.0004086	12	138	15	264
849	0.0004096	8	146	19	280
850	0.0003612	0	133	17	266
851	0.0003459	38	161	19	284
852	0.0004007	12	143	18	274
853	0.0003535	4	139	14	274
854	0.0003484	40	155	19	270
855	0.0003517	2	128	13	254
856	0.0003639	28	154	17	280
857	0.0004027	13	139	15	265
858	0.0003747	47	166	18	285
859	0.0003759	28	163	17	298
860	0.0003569	7	134	18	261
861	0.0003523	22	142	14	259
862	0.0003757	32	163	16	294
863	0.0003817	27	156	19	285
864	0.0003573	21	151	17	280
865	0.0003679	11	145	18	279
866	0.0003721	2	144	16	286
867	0.0003564	10	148	19	285
868	0.0003591	6	138	15	270
869	0.0003786	36	153	17	270
870	0.0003467	36	155	17	272
871	0.000401	7	142	17	273
872	0.000363	31	146	16	254
873	0.0004028	29	150	18	271
874	0.000374	13	139	15	265
875	0.0003702	0	135	16	262
876	0.0003896	14	150	16	278
877	0.0003589	42	161	17	280
878	0.0003672	11	135	14	258
879	0.0003874	7	142	19	276
880	0.0003841	4	131	15	257
881	0.0003516	56	176	18	293
882	0.0003805	14	146	18	278
883	0.0003641	17	138	17	259
884	0.000401	1	135	17	269
885	0.0003579	15	140	15	265
886	0.0003728	12	150	19	288
887	0.0004003	25	146	15	267
888	0.0003667	2	143	16	275
889	0.0003715	4	144	17	284
890	0.000411	8	140	14	268
891	0.0003804	19	141	14	263
892	0.0003521	24	143	15	262
893	0.0004999	43	158	17	273
894	0.0003718	8	139	17	270
895	0.0003436	56	178	19	300
896	0.000373	45	157	19	268
897	0.0004084	25	151	17	273
898	0.0003559	28	151	19	274
899	0.0003717	44	156	17	268
900	0.0003418	59	168	18	277
901	0.000393	13	140	19	267
902	0.0003814	5	141	19	277
903	0.0003587	22	147	17	272
904	0.0003532	21	145	18	269
905	0.0003745	3	139	18	274
906	0.0003521	4	138	16	272
907	0.0003696	24	155	15	284
908	0.0003496	46	157	19	268
909	0.0003532	19	148	18	277
910	0.0004435	27	155	16	283
911	0.0003746	24	152	17	280
912	0.0003683	13	142	14	271
913	0.0003606	32	163	16	284
914	0.0003481	28	140	14	252
915	0.0004104	29	152	16	275
916	0.0003668	1	136	19	271
917	0.0003476	51	159	17	267
918	0.0003623	2	137	16	272
919	0.000352	1	139	14	277
920	0.0003697	13	146	15	279
921	0.0003546	3	131	17	259
922	0.0003751	9	140	15	271
923	0.0003943	33	158	18	283
924	0.0003576	23	152	17	278
925	0.000361	17	150	17	276
926	0.0003674	16	144	16	272
927	0.0003595	9	141	14	273
928	0.0003595	17	148	18	279
929	0.0003577	13	144	16	273
930	0.0003549	26	150	19	264
931	0.0003612	22	152	16	282
932	0.0003893	40	162	18	284
933	0.0003573	29	156	17	283
934	0.0003897	30	156	15	280
935	0.0003541	10	143	15	276
936	0.0003592	19	147	14	274
937	0.0003988	6	145	16	278
938	0.0003829	16	148	16	275
939	0.0003537	22	150	17	278
940	0.0003629	6	137	16	267
941	0.0003575	24	150	16	276
942	0.0003417	36	153	16	269
943	0.0003592	26	142	14	258
944	0.0003838	18	145	15	272
945	0.0003477	38	154	18	270
946	0.0003549	1	144	16	287
947	0.0003531	37	160	19	283
948	0.0003942	37	158	17	276
949	0.0003516	5	142	14	279
950	0.0004142	8	132	16	256
951	0.0003534	11	138	17	265
952	0.0003488	22	148	18	274
953	0.0003964	9	139	18	264
954	0.000391	12	146	14	280
955	0.0003531	9	144	18	271
956	0.0003812	18	139	18	260
957	0.0003766	29	146	16	263
958	0.0003767	22	150	18	278
959	0.0003461	18	144	16	270
960	0.0003507	4	134	17	264
961	0.0003574	4	135	17	266
962	0.000342	19	143	15	267
963	0.0004031	12	140	15	268
964	0.0003665	23	152	19	281
965	0.0003939	42	155	16	268
966	0.0003827	8	139	14	270
967	0.0003692	25	150	19	274
968	0.000368	21	145	18	269
969	0.0003777	38	161	18	283
970	0.0003506	16	133	15	250
971	0.0004098	8	140	18	272
972	0.0003594	1	139	18	277
973	0.000356	23	153	17	282
974	0.0003692	25	158	19	291
975	0.0003387	26	153	17	273
976	0.0004045	6	132	17	258
977	0.000356	34	152	17	270
978	0.0003482	45	157	17	269
979	0.0003526	26	140	14	254
980	0.000351	6	130	13	254
981	0.0004243	32	161	18	290
982	0.0003662	14	145	17	276
983	0.000358	18	155	17	292
984	0.0003655	2	140	16	278
985	0.0003553	33	158	17	283
986	0.000398	13	143	15	273
987	0.0003522	23	158	18	288
988	0.0003602	7	135	18	263
989	0.000357	35	161	17	287
990	0.0003462	24	146	15	268
991	0.0004111	14	144	17	274
992	0.0003754	5	137	17	269
993	0.0003504	17	139	15	261
994	0.0004157	55	165	18	275
995	0.0003821	5	141	17	277
996	0.0003886	2	144	17	282
997	0.0003594	43	162	18	281
998	0.0004998	2	133	16	264
999	0.0003857	0	130	16	260
mean	0.000374992	18.81	146.159	16.524	272.181

## Sheet: PolyMin_SEq
	time	SEq	Bal	Reg	Egal
0	0.0029021	11	140	15	269
1	0.0029622	27	142	16	257
2	0.0030932	1	139	15	277
3	0.0029049	0	136	15	272
4	0.0029753	32	153	16	274
5	0.0031734	5	141	17	277
6	0.002994	8	144	18	280
7	0.0032683	16	150	16	284
8	0.0030854	1	133	16	265
9	0.0029695	19	140	18	261
10	0.0030188	15	147	18	279
11	0.0031639	2	133	15	264
12	0.0028112	2	136	13	270
13	0.0030971	23	152	16	281
14	0.003077	10	144	17	278
15	0.0032658	24	143	17	262
16	0.0029692	28	150	16	272
17	0.003054	12	137	14	262
18	0.0029534	6	140	15	274
19	0.0031416	7	139	14	271
20	0.0031936	10	142	18	274
21	0.0030883	2	137	15	272
22	0.0029581	1	135	17	269
23	0.0031937	14	129	14	244
24	0.0032961	3	136	15	269
25	0.0030315	10	148	19	286
26	0.0030445	3	129	15	255
27	0.0032679	4	143	17	282
28	0.0028527	27	147	14	267
29	0.0029905	5	128	14	251
30	0.0031031	6	131	13	256
31	0.0032028	7	140	19	273
32	0.0030273	12	135	18	258
33	0.0030182	0	131	17	262
34	0.0028904	10	143	15	276
35	0.0030121	20	144	17	268
36	0.0031014	29	156	15	283
37	0.00311	17	140	17	263
38	0.0029354	23	146	14	269
39	0.0029552	32	153	15	274
40	0.0031089	10	136	13	262
41	0.0032146	11	132	16	253
42	0.0028483	6	140	17	274
43	0.0025973	11	139	15	267
44	0.003113	12	142	18	272
45	0.0030996	1	132	19	263
46	0.0031518	1	134	18	267
47	0.003178	11	141	15	271
48	0.0030267	32	150	15	268
49	0.0031975	4	138	15	272
50	0.003206	18	145	18	272
51	0.0030494	19	150	18	281
52	0.003047	5	135	18	265
53	0.0029684	21	142	17	263
54	0.0031289	16	145	16	274
55	0.0029675	18	140	17	262
56	0.0030087	11	146	17	281
57	0.0029327	1	140	16	279
58	0.002858	11	133	13	255
59	0.0031313	4	132	17	260
60	0.0030813	15	148	15	281
61	0.0030374	14	136	15	258
62	0.003	10	138	18	266
63	0.0029403	23	148	18	273
64	0.0030365	28	155	19	282
65	0.0028961	7	138	13	269
66	0.003034	3	129	17	255
67	0.0031839	5	136	15	267
68	0.0032857	32	154	17	276
69	0.002713	13	149	17	285
70	0.002987	5	139	14	273
71	0.0033006	30	154	17	278
72	0.0029575	12	150	17	288
73	0.003178	21	141	15	261
74	0.0029374	5	140	18	275
75	0.0029445	9	139	17	269
76	0.0031615	39	156	18	273
77	0.0031985	9	141	15	273
78	0.0030697	5	138	14	271
79	0.0029326	22	151	18	280
80	0.0029828	3	131	14	259
81	0.0033089	14	148	17	282
82	0.0028955	18	146	19	274
83	0.003159	12	139	16	266
84	0.00309	5	138	13	271
85	0.0030953	1	145	19	289
86	0.0031569	1	124	15	247
87	0.0030272	18	150	16	282
88	0.0030289	3	140	17	277
89	0.0030132	19	142	13	265
90	0.0028449	23	150	17	277
91	0.0033038	30	145	16	260
92	0.0030342	23	155	19	287
93	0.003031	8	138	18	268
94	0.0029217	2	134	14	266
95	0.0031766	18	149	15	280
96	0.0029918	1	139	18	277
97	0.0030459	13	144	15	275
98	0.0036543	6	141	16	276
99	0.0028855	4	134	15	264
100	0.0030062	5	138	15	271
101	0.0029459	17	141	15	265
102	0.0031573	0	139	16	278
103	0.0030913	62	169	18	276
104	0.0031546	29	155	16	281
105	0.0028257	4	134	17	264
106	0.0031446	6	148	16	290
107	0.0027344	6	136	17	266
108	0.003079	2	132	17	262
109	0.0030197	15	151	16	287
110	0.0029693	42	159	18	276
111	0.0031902	6	146	16	286
112	0.002727	7	142	14	277
113	0.0032358	6	136	16	266
114	0.003107	9	146	16	283
115	0.0032511	6	135	15	264
116	0.0028963	2	130	15	258
117	0.0031501	7	138	15	269
118	0.0029795	13	141	13	269
119	0.002945	16	140	14	264
120	0.0029786	13	138	16	263
121	0.0029624	10	139	17	268
122	0.0029517	1	132	17	263
123	0.0030016	5	128	17	251
124	0.0031953	8	143	19	278
125	0.0026387	2	127	13	252
126	0.0028842	6	138	14	270
127	0.0030579	14	142	15	270
128	0.0031333	0	133	16	266
129	0.0030071	40	159	16	278
130	0.0026831	12	138	15	264
131	0.0028565	3	130	16	257
132	0.0030587	2	143	15	284
133	0.0030133	18	134	13	250
134	0.0031023	15	148	17	281
135	0.0029527	2	137	16	272
136	0.0033414	11	137	14	263
137	0.0032644	13	132	16	251
138	0.0029884	29	155	19	281
139	0.0030691	0	131	15	262
140	0.0029782	15	138	14	261
141	0.002894	10	142	17	274
142	0.0033434	12	146	16	280
143	0.003011	2	133	14	264
144	0.0029887	6	135	18	264
145	0.0031864	5	139	17	273
146	0.0029629	3	131	18	259
147	0.0032394	28	152	17	276
148	0.0030317	4	143	17	282
149	0.0030272	2	138	16	274
150	0.0031935	2	140	15	278
151	0.0028467	3	133	14	263
152	0.0030471	9	140	15	271
153	0.003054	0	137	17	274
154	0.0031542	25	147	16	269
155	0.0030896	6	143	17	280
156	0.002849	1	137	18	273
157	0.0028908	14	138	13	262
158	0.0030581	1	127	12	253
159	0.0030253	15	144	19	273
160	0.0030279	16	138	15	260
161	0.0029502	11	144	17	277
162	0.0031936	19	148	17	277
163	0.0030981	0	141	17	282
164	0.0032639	13	144	16	275
165	0.0030811	3	136	19	269
166	0.0032683	22	155	17	288
167	0.0029341	15	142	16	269
168	0.0036996	7	149	19	291
169	0.0029689	19	140	16	261
170	0.0031515	46	162	17	278
171	0.0030331	4	139	15	274
172	0.0033087	2	135	13	268
173	0.0028096	6	139	14	272
174	0.00314	30	151	16	272
175	0.0032999	14	145	13	276
176	0.0029484	33	146	17	259
177	0.0030978	22	149	14	276
178	0.0029071	1	144	17	287
179	0.003169	0	135	15	270
180	0.0031949	22	136	14	250
181	0.0029346	1	142	16	283
182	0.0028101	24	141	16	258
183	0.0031795	7	145	16	283
184	0.0029317	16	138	18	260
185	0.0028221	18	138	18	258
186	0.0028799	16	145	13	274
187	0.0031162	7	127	15	247
188	0.0029874	48	171	18	294
189	0.0034097	3	137	15	271
190	0.002914	17	132	16	247
191	0.0030196	4	138	18	272
192	0.0027545	12	137	17	262
193	0.0031287	14	146	16	278
194	0.0033501	1	137	16	273
195	0.003153	13	136	15	259
196	0.0030056	13	134	15	255
197	0.0029302	13	140	17	267
198	0.0030202	37	156	16	275
199	0.0031133	25	150	15	275
200	0.0030484	10	133	14	256
201	0.0029219	25	152	18	279
202	0.0030625	10	142	16	274
203	0.0031409	9	144	18	279
204	0.0028916	9	152	18	295
205	0.0029263	4	138	16	272
206	0.0030039	12	137	14	262
207	0.003082	5	140	16	275
208	0.0030264	21	142	17	263
209	0.0030438	20	146	16	272
210	0.00308	17	143	19	269
211	0.0030909	4	135	16	266
212	0.0030214	3	139	14	275
213	0.0031841	38	161	16	284
214	0.0030997	24	154	16	284
215	0.0031441	13	142	13	271
216	0.0030619	20	143	15	266
217	0.0036188	3	132	16	261
218	0.0029352	4	132	14	260
219	0.0030394	4	143	14	282
220	0.0030711	3	138	17	273
221	0.0030669	13	143	17	273
222	0.0029892	5	134	16	263
223	0.0028067	2	134	14	266
224	0.0029835	17	144	19	271
225	0.0030461	9	144	17	279
226	0.0029448	27	152	19	277
227	0.0029615	2	133	18	264
228	0.0032742	24	150	17	276
229	0.0030954	9	133	15	257
230	0.0032814	26	152	14	278
231	0.0032404	19	147	14	275
232	0.0032075	13	137	14	261
233	0.0028728	2	130	18	258
234	0.0029928	12	142	15	272
235	0.0029825	4	136	13	268
236	0.0030566	7	136	16	265
237	0.0032208	8	149	17	290
238	0.0030181	18	149	16	280
239	0.003035	9	135	17	261
240	0.0029784	2	138	15	274
241	0.0029173	10	138	16	266
242	0.0033137	1	138	17	275
243	0.0031102	20	152	19	284
244	0.0032223	5	138	16	271
245	0.002974	4	132	15	260
246	0.0028805	14	139	16	264
247	0.003014	15	147	15	279
248	0.0033106	5	135	15	265
249	0.0030179	9	144	19	279
250	0.0033356	18	146	19	274
251	0.002903	8	135	15	262
252	0.0031805	24	156	19	288
253	0.0030446	5	131	15	257
254	0.0029922	39	158	15	277
255	0.0027076	3	146	17	289
256	0.0030068	1	134	17	267
257	0.0030395	7	135	14	263
258	0.0030243	6	143	17	280
259	0.0029213	14	142	18	270
260	0.0031897	14	148	15	282
261	0.0029477	23	149	17	275
262	0.0029921	19	145	16	271
263	0.0030178	2	134	17	266
264	0.0030539	14	139	19	264
265	0.0033526	3	139	17	275
266	0.0032318	2	135	16	268
267	0.0031745	5	147	17	289
268	0.003113	17	143	15	269
269	0.0032192	12	135	17	258
270	0.0033083	20	147	16	274
271	0.0028642	2	144	16	286
272	0.0031259	13	143	16	273
273	0.0031493	11	132	18	253
274	0.0030383	17	153	15	289
275	0.0029585	12	134	17	256
276	0.003038	19	147	16	275
277	0.0033361	33	149	18	265
278	0.0032058	13	139	14	265
279	0.0030715	10	151	17	292
280	0.0031556	19	155	19	291
281	0.0030558	12	147	17	282
282	0.0029408	6	143	18	280
283	0.0030512	12	130	16	248
284	0.0030364	2	138	14	274
285	0.0030658	6	138	17	270
286	0.0031618	10	146	14	282
287	0.0031328	1	136	15	271
288	0.0040752	9	142	19	275
289	0.0027944	4	136	15	268
290	0.0031854	26	155	17	284
291	0.0032236	21	152	17	283
292	0.002949	3	136	18	269
293	0.0032194	1	128	14	255
294	0.0025422	3	142	19	281
295	0.0035483	8	145	17	282
296	0.0030235	13	142	16	271
297	0.0030435	1	139	17	277
298	0.0030169	1	133	15	265
299	0.0029772	14	137	15	260
300	0.0027929	4	136	17	268
301	0.0028624	11	133	17	255
302	0.0028894	33	149	15	265
303	0.0030063	2	129	17	256
304	0.0028906	8	142	16	276
305	0.0032545	3	139	17	275
306	0.0032943	20	147	15	274
307	0.002897	3	139	18	275
308	0.0028853	4	145	18	286
309	0.0027007	23	147	18	271
310	0.0031837	11	140	16	269
311	0.0030606	30	157	16	284
312	0.0031352	4	142	16	280
313	0.0030151	33	157	15	281
314	0.0030489	3	138	19	273
315	0.0033333	27	148	17	269
316	0.0029545	16	140	15	264
317	0.0030592	3	140	15	277
318	0.0030507	6	137	19	268
319	0.0030224	17	137	15	257
320	0.0029479	12	137	18	262
321	0.0034113	1	135	17	269
322	0.0029549	7	138	14	269
323	0.002741	17	146	19	275
324	0.0030026	24	138	15	252
325	0.0031719	15	133	16	251
326	0.0030317	12	150	16	288
327	0.0029204	1	128	15	255
328	0.0028384	6	144	16	282
329	0.0030312	9	136	19	263
330	0.0029771	3	130	13	257
331	0.0031358	8	134	14	260
332	0.0028879	23	150	17	277
333	0.0036731	16	143	16	270
334	0.0030526	25	153	16	281
335	0.0029156	1	136	15	271
336	0.0028431	6	136	15	266
337	0.0030428	7	139	16	271
338	0.0030624	33	155	19	277
339	0.0029696	13	137	15	261
340	0.0028532	23	143	17	263
341	0.0031208	12	148	17	284
342	0.0029396	6	139	14	272
343	0.002931	43	161	15	279
344	0.0032191	1	137	19	273
345	0.0033759	9	139	17	269
346	0.0030406	6	131	18	256
347	0.0031061	12	140	18	268
348	0.002951	1	134	15	267
349	0.0028601	33	162	16	291
350	0.0030224	39	164	19	289
351	0.0031509	11	142	17	273
352	0.0029471	12	142	17	272
353	0.0029659	12	142	14	272
354	0.0031424	15	148	15	281
355	0.0030354	11	134	15	257
356	0.0032667	8	135	14	262
357	0.0030364	22	143	16	264
358	0.0032448	1	136	16	271
359	0.0029902	0	133	15	266
360	0.0031744	33	153	16	273
361	0.0029133	4	139	17	274
362	0.0032945	26	146	13	266
363	0.0029644	12	141	16	270
364	0.0030439	4	136	15	268
365	0.0029906	18	136	14	254
366	0.0030098	19	148	16	277
367	0.0032733	34	145	14	256
368	0.0030519	10	142	16	274
369	0.0026465	5	137	18	269
370	0.0031145	2	142	17	282
371	0.0029505	8	139	19	270
372	0.0031946	15	141	15	267
373	0.0031701	0	141	16	282
374	0.0033918	10	146	16	282
375	0.0030288	18	143	15	268
376	0.0032216	4	146	16	288
377	0.0029789	10	141	16	272
378	0.0028351	5	129	15	253
379	0.0028448	17	147	19	277
380	0.0029744	7	144	18	281
381	0.0030707	5	141	15	277
382	0.0033109	21	141	13	261
383	0.0029505	18	147	16	276
384	0.0032891	24	145	15	266
385	0.003084	11	139	16	267
386	0.003063	12	136	13	260
387	0.0030286	6	130	14	254
388	0.003124	9	145	17	281
389	0.0029711	5	137	15	269
390	0.0030258	17	141	18	265
391	0.0030101	10	139	16	268
392	0.0033655	9	138	15	267
393	0.0028304	20	138	18	256
394	0.0028761	4	136	17	268
395	0.0029664	0	130	13	260
396	0.0031561	22	147	17	272
397	0.0031334	7	135	15	263
398	0.0028388	33	153	18	273
399	0.003114	9	141	17	273
400	0.0030884	9	134	13	259
401	0.0030193	13	146	15	279
402	0.0030932	12	141	16	270
403	0.0031472	6	141	14	276
404	0.0030507	0	134	15	268
405	0.0032633	10	136	16	262
406	0.0030197	4	142	15	280
407	0.0030676	10	140	15	270
408	0.003107	28	152	19	276
409	0.0032166	12	139	16	266
410	0.0029981	11	135	14	259
411	0.0031998	19	138	14	257
412	0.0030452	0	134	14	268
413	0.0030541	15	146	19	277
414	0.0027274	15	147	16	279
415	0.0032215	10	144	15	278
416	0.0030085	7	138	16	269
417	0.0030213	27	148	14	269
418	0.0029959	21	147	17	273
419	0.0031316	16	153	18	290
420	0.00302	14	144	16	274
421	0.0032481	1	131	14	261
422	0.0030938	18	141	19	264
423	0.0030038	16	139	18	262
424	0.0030485	19	140	16	261
425	0.0029823	18	147	17	276
426	0.0029752	16	146	16	276
427	0.0030608	18	142	13	266
428	0.0029842	23	143	16	263
429	0.0032145	21	143	13	265
430	0.0033145	27	147	17	267
431	0.0032621	12	147	17	282
432	0.0031095	1	140	15	279
433	0.0030967	1	129	17	257
434	0.0029659	6	135	16	264
435	0.0029475	17	139	16	261
436	0.0029485	3	132	13	261
437	0.0032392	1	134	16	267
438	0.003142	2	134	14	266
439	0.0028232	27	141	18	255
440	0.002976	1	132	18	263
441	0.002979	21	144	15	267
442	0.0028855	17	136	17	255
443	0.003131	11	137	14	263
444	0.0029017	4	131	15	258
445	0.0029844	8	134	14	260
446	0.0030329	4	138	16	272
447	0.0030155	10	137	13	264
448	0.003279	36	154	15	272
449	0.0029658	1	135	19	269
450	0.0031045	14	145	18	276
451	0.0029369	0	133	16	266
452	0.0032574	9	143	17	277
453	0.002857	21	144	17	267
454	0.003277	4	142	16	280
455	0.0031475	1	134	14	267
456	0.0029779	14	147	18	280
457	0.0032457	6	137	17	268
458	0.0030171	1	132	15	263
459	0.0028974	1	139	16	277
460	0.0028973	0	134	15	268
461	0.0028603	12	142	18	272
462	0.0028959	15	146	17	277
463	0.0028942	26	144	17	262
464	0.0030182	16	142	16	268
465	0.0029316	7	137	16	267
466	0.0031642	1	143	16	285
467	0.0029988	2	141	17	280
468	0.0030996	2	138	18	274
469	0.0031729	6	136	17	266
470	0.003004	22	149	17	276
471	0.003217	22	148	15	274
472	0.0030621	1	131	17	261
473	0.002936	2	140	19	278
474	0.003142	5	135	14	265
475	0.0027131	3	127	13	251
476	0.0031506	29	152	18	275
477	0.0031979	13	141	14	269
478	0.0028878	4	139	16	274
479	0.0031248	21	147	16	273
480	0.0029531	9	137	16	265
481	0.0030681	3	128	17	253
482	0.003035	30	146	15	262
483	0.0029574	3	133	14	263
484	0.0032397	12	139	19	266
485	0.0029039	8	137	15	266
486	0.0029864	12	136	16	260
487	0.0029137	6	139	14	272
488	0.0030996	13	142	16	271
489	0.0028874	29	144	14	259
490	0.0030442	13	142	16	271
491	0.0032912	23	153	17	283
492	0.003482	24	144	19	264
493	0.0032526	29	159	18	289
494	0.0030524	15	145	17	275
495	0.0032026	13	144	17	275
496	0.0029964	27	149	16	271
497	0.0028584	34	154	16	274
498	0.0031287	2	147	17	292
499	0.0032166	3	138	14	273
500	0.0033025	12	141	15	270
501	0.0029501	15	141	15	267
502	0.0029921	27	142	17	257
503	0.0030762	3	135	16	267
504	0.003257	18	154	14	290
505	0.0029604	5	133	18	261
506	0.0029656	18	146	17	274
507	0.0031604	7	141	15	275
508	0.0030807	6	146	19	286
509	0.0030195	2	133	16	264
510	0.0029893	4	143	16	282
511	0.0028954	20	146	16	272
512	0.0032627	29	145	16	261
513	0.0027733	1	126	18	251
514	0.003147	10	136	13	262
515	0.0030425	28	146	19	264
516	0.0032231	8	142	15	276
517	0.0030822	4	135	14	266
518	0.0028665	19	141	16	263
519	0.0029652	2	134	13	266
520	0.0032154	24	155	18	286
521	0.0030527	10	133	14	256
522	0.0029473	17	144	15	271
523	0.0030614	0	137	17	274
524	0.0029589	8	135	16	262
525	0.0031797	2	135	15	268
526	0.0030611	25	151	17	277
527	0.0030662	21	148	16	275
528	0.0031056	25	137	16	249
529	0.002934	36	151	18	266
530	0.0029372	5	142	17	279
531	0.0030864	6	139	17	272
532	0.0030773	25	141	13	257
533	0.0032103	22	146	17	270
534	0.0031281	1	136	16	271
535	0.002893	4	135	15	266
536	0.0028791	1	140	19	279
537	0.0031193	0	127	14	254
538	0.0031047	4	129	14	254
539	0.0029151	1	142	16	283
540	0.0032338	7	141	16	275
541	0.0032462	8	132	15	256
542	0.0031597	6	142	16	278
543	0.0030447	27	152	16	277
544	0.0030073	11	144	18	277
545	0.0030003	22	146	15	270
546	0.0026442	1	129	15	257
547	0.0030971	22	149	17	276
548	0.0030406	15	141	16	267
549	0.0029035	27	146	17	265
550	0.003106	12	138	16	264
551	0.0031964	3	139	18	275
552	0.0030575	4	136	15	268
553	0.0031451	12	138	19	264
554	0.0028534	31	153	19	275
555	0.0030303	13	141	14	269
556	0.0029069	0	127	13	254
557	0.0029941	14	134	17	254
558	0.003195	2	146	16	290
559	0.0029111	12	140	17	268
560	0.0030419	15	143	16	271
561	0.0028657	11	145	19	279
562	0.0031058	5	145	17	285
563	0.0029355	14	139	16	264
564	0.0029711	50	167	18	284
565	0.0030614	5	139	15	273
566	0.0027658	0	136	19	272
567	0.0029932	33	156	19	279
568	0.0028631	3	132	15	261
569	0.0030581	0	137	14	274
570	0.0028894	13	137	15	261
571	0.0034562	5	139	17	273
572	0.0029629	8	137	17	266
573	0.0030659	6	139	18	272
574	0.0031784	13	149	16	285
575	0.0031045	20	152	18	284
576	0.0030115	9	146	15	283
577	0.0029751	13	138	15	263
578	0.0030485	27	150	16	273
579	0.0029446	9	141	15	273
580	0.003167	6	137	15	268
581	0.0030781	12	142	16	272
582	0.0027005	4	136	18	268
583	0.0030195	12	137	15	262
584	0.0029732	18	139	19	260
585	0.0030801	9	135	16	261
586	0.0031399	1	137	15	273
587	0.0030687	1	132	14	263
588	0.0029373	12	134	14	256
589	0.0031782	2	131	16	260
590	0.0030337	32	148	14	264
591	0.003142	27	157	16	287
592	0.0029572	14	140	15	266
593	0.0031683	47	160	18	273
594	0.0030423	8	135	19	262
595	0.0031175	9	134	14	259
596	0.0032685	5	147	16	289
597	0.0031916	10	143	17	276
598	0.0030774	17	141	18	265
599	0.002895	26	150	17	274
600	0.0033001	23	153	18	283
601	0.0030001	0	129	16	258
602	0.0031395	10	138	16	266
603	0.0029706	15	148	18	281
604	0.0031076	17	133	15	249
605	0.0030995	17	139	16	261
606	0.0029046	0	132	18	264
607	0.0029369	15	136	16	257
608	0.003196	13	135	17	257
609	0.0030034	28	151	19	274
610	0.0032993	32	150	15	268
611	0.0028655	26	147	18	268
612	0.0028317	2	144	19	286
613	0.0030109	45	158	15	271
614	0.0031613	33	156	17	279
615	0.0029672	11	146	17	281
616	0.0030297	24	140	18	256
617	0.0030962	36	158	16	280
618	0.0030027	16	143	18	270
619	0.0030179	5	135	15	265
620	0.0032849	19	150	17	281
621	0.0028915	12	140	18	268
622	0.0031774	8	146	15	284
623	0.0030964	26	153	15	280
624	0.0028478	7	138	14	269
625	0.0028921	16	147	18	278
626	0.002755	5	136	17	267
627	0.0030656	12	141	19	270
628	0.0031431	6	138	16	270
629	0.0035486	7	140	16	273
630	0.0031253	3	137	15	271
631	0.0032127	3	141	18	279
632	0.0030055	25	151	18	277
633	0.0030273	5	134	17	263
634	0.0032453	35	159	15	283
635	0.0028379	27	150	16	273
636	0.0029994	1	140	19	279
637	0.0028944	7	126	17	245
638	0.0029927	3	132	17	261
639	0.003023	2	141	16	280
640	0.0028723	1	144	17	287
641	0.0029857	10	143	15	276
642	0.0028317	4	141	17	278
643	0.0032677	20	146	19	272
644	0.0028534	6	131	15	256
645	0.0029455	6	134	14	262
646	0.0029205	9	137	16	265
647	0.0032314	11	143	16	275
648	0.0030645	26	142	16	258
649	0.0031562	1	141	15	281
650	0.0029135	26	148	17	270
651	0.0031259	21	142	15	263
652	0.0029796	14	134	14	254
653	0.0032627	0	134	16	268
654	0.0029775	11	139	13	267
655	0.0028863	14	145	16	276
656	0.0029976	1	128	14	255
657	0.0031567	10	142	18	274
658	0.0031256	8	138	18	268
659	0.0029841	28	152	15	276
660	0.0031938	0	137	15	274
661	0.0034557	13	143	14	273
662	0.0030828	4	143	16	282
663	0.0030844	9	142	17	275
664	0.0030714	6	143	17	280
665	0.0030959	2	131	16	260
666	0.0029217	3	136	18	269
667	0.003174	29	153	16	277
668	0.0030265	25	156	16	287
669	0.0030612	9	143	15	277
670	0.0029286	13	141	15	269
671	0.0034848	15	136	15	257
672	0.0030746	8	140	15	272
673	0.0030986	23	145	17	267
674	0.0029164	9	139	14	269
675	0.0032852	5	146	17	287
676	0.0029999	7	133	16	259
677	0.0029318	3	138	15	273
678	0.003265	8	136	17	264
679	0.0029652	1	139	16	277
680	0.0029508	15	147	18	279
681	0.0030057	10	133	14	256
682	0.0029488	3	124	13	245
683	0.0030458	3	135	14	267
684	0.0030464	2	130	13	258
685	0.0036339	6	137	17	268
686	0.0027786	5	134	16	263
687	0.0031952	43	163	18	283
688	0.0029332	2	136	15	270
689	0.0033243	1	140	18	279
690	0.003176	2	132	14	262
691	0.0029954	6	135	15	264
692	0.0029507	0	137	14	274
693	0.0029292	13	144	15	275
694	0.0030793	41	152	18	263
695	0.0028465	15	144	17	273
696	0.0030903	9	136	15	263
697	0.0029497	6	141	15	276
698	0.0030985	15	141	18	267
699	0.0032129	9	132	15	255
700	0.0030368	3	131	15	259
701	0.0028796	6	134	18	262
702	0.0029666	8	132	16	256
703	0.0031521	23	151	18	279
704	0.003388	2	142	17	282
705	0.0031281	13	142	16	271
706	0.0031011	24	153	17	282
707	0.002988	4	147	16	290
708	0.0030396	8	145	16	282
709	0.0030045	10	150	19	290
710	0.0030983	14	143	15	272
711	0.0030803	4	139	18	274
712	0.0029005	3	141	19	279
713	0.0030912	24	149	18	274
714	0.002972	17	147	19	277
715	0.0029966	2	128	15	254
716	0.0032217	3	132	17	261
717	0.0030183	5	131	18	257
718	0.0033572	1	142	15	283
719	0.0030483	21	146	17	271
720	0.0029304	33	162	19	291
721	0.0029451	16	142	19	268
722	0.0030991	12	139	17	266
723	0.0029519	18	144	18	270
724	0.0030416	14	141	17	268
725	0.0028315	3	135	17	267
726	0.0028715	4	138	17	272
727	0.0028723	7	139	16	271
728	0.0030248	5	134	18	263
729	0.0031251	15	142	15	269
730	0.0030208	23	146	17	269
731	0.0030903	28	155	14	282
732	0.0032915	15	148	16	281
733	0.0028656	5	136	15	267
734	0.0029437	3	127	15	251
735	0.003059	8	135	18	262
736	0.0032453	2	137	16	272
737	0.0028689	19	142	14	265
738	0.0035461	4	142	17	280
739	0.0031218	6	133	17	260
740	0.003028	1	134	16	267
741	0.0029898	4	135	14	266
742	0.0031063	23	145	13	267
743	0.0028761	8	141	17	274
744	0.0031333	11	148	15	285
745	0.0030318	9	139	17	269
746	0.0030754	6	141	16	276
747	0.0029569	5	142	15	279
748	0.0030051	12	147	16	282
749	0.0032225	5	138	15	271
750	0.0028032	2	140	17	278
751	0.0030685	9	140	13	271
752	0.0030873	8	140	19	272
753	0.0030187	10	144	16	278
754	0.0029624	13	146	18	279
755	0.0030276	18	145	18	272
756	0.0029928	3	135	16	267
757	0.0032465	1	137	16	273
758	0.0032288	4	145	19	286
759	0.0033347	30	150	15	270
760	0.0031453	0	130	13	260
761	0.0029429	11	145	17	279
762	0.0029676	4	134	16	264
763	0.0031719	12	134	14	256
764	0.0027715	3	142	16	281
765	0.003043	0	135	18	270
766	0.0035397	17	149	16	281
767	0.0032855	34	155	18	276
768	0.0035802	1	132	15	263
769	0.0029791	3	137	17	271
770	0.003022	10	132	18	254
771	0.0030092	6	132	14	258
772	0.0031809	0	134	16	268
773	0.0029064	2	143	18	284
774	0.0030956	8	133	18	258
775	0.0030559	23	156	17	289
776	0.0030255	4	134	16	264
777	0.0031747	23	154	18	285
778	0.0030269	45	161	17	277
779	0.0031573	10	139	17	268
780	0.0032179	13	141	16	269
781	0.0030411	15	137	16	259
782	0.0029523	5	140	17	275
783	0.0030096	24	151	17	278
784	0.0031047	24	147	15	270
785	0.0030376	5	140	16	275
786	0.0030971	4	136	16	268
787	0.0028788	17	145	14	273
788	0.002921	6	138	15	270
789	0.0029945	2	129	13	256
790	0.0028414	19	141	14	263
791	0.0030811	6	134	15	262
792	0.0029442	9	138	18	267
793	0.0032436	28	154	17	280
794	0.002881	39	157	19	275
795	0.0030291	16	140	17	264
796	0.00286	2	130	17	258
797	0.0029404	2	135	17	268
798	0.0031815	6	140	14	274
799	0.0029349	27	148	18	269
800	0.0031974	10	133	13	256
801	0.0029328	5	129	19	253
802	0.0030993	10	138	14	266
803	0.0029973	39	166	19	293
804	0.0028055	6	133	18	260
805	0.0030377	18	144	18	270
806	0.0031375	2	128	18	254
807	0.0028812	1	137	18	273
808	0.0048594	8	136	17	264
809	0.0030885	0	131	17	262
810	0.0026848	5	146	15	287
811	0.0028165	31	154	18	277
812	0.0031718	8	144	16	280
813	0.0029051	1	136	15	271
814	0.003118	1	141	15	281
815	0.003011	8	136	15	264
816	0.0031847	7	134	18	261
817	0.0030245	7	135	13	263
818	0.0029802	3	134	17	265
819	0.0033547	2	137	18	272
820	0.0032533	1	128	16	255
821	0.0031074	5	131	17	257
822	0.0030375	11	139	14	267
823	0.0029398	19	144	14	269
824	0.0030866	5	132	15	259
825	0.0030192	0	143	15	286
826	0.0032061	3	141	16	279
827	0.0030196	15	143	16	271
828	0.0029441	22	136	14	250
829	0.0029468	2	137	14	272
830	0.0029981	11	140	15	269
831	0.0030734	19	137	14	255
832	0.0031213	28	147	16	266
833	0.0030685	3	140	16	277
834	0.0031024	6	134	15	262
835	0.0029869	38	158	17	278
836	0.0030493	32	149	16	266
837	0.0030859	3	138	17	273
838	0.0029973	20	147	18	274
839	0.0027803	18	149	17	280
840	0.0031466	34	153	18	272
841	0.0030873	25	151	18	277
842	0.0031518	2	138	16	274
843	0.0028263	6	140	16	274
844	0.003193	3	133	18	263
845	0.003179	2	139	16	276
846	0.0028935	16	147	18	278
847	0.0029746	2	129	16	256
848	0.002952	12	138	15	264
849	0.0029683	9	144	19	279
850	0.0030386	0	133	17	266
851	0.0033727	6	141	19	276
852	0.0029527	19	145	18	271
853	0.0029024	4	139	14	274
854	0.0032363	21	149	16	277
855	0.0028639	2	128	13	254
856	0.002999	4	138	17	272
857	0.0030164	1	131	15	261
858	0.0031499	14	146	18	278
859	0.0031729	6	151	17	296
860	0.0027975	7	134	18	261
861	0.0031289	13	134	14	255
862	0.0032118	3	142	17	281
863	0.0032908	2	140	17	278
864	0.0030867	1	138	14	275
865	0.0031973	11	145	18	279
866	0.0030399	10	146	16	282
867	0.0027988	43	164	19	285
868	0.0029769	6	138	15	270
869	0.0030746	3	134	18	265
870	0.0031576	12	142	17	272
871	0.0030404	7	142	17	277
872	0.0030416	33	143	16	253
873	0.0031764	29	150	18	271
874	0.0029522	13	139	15	265
875	0.0030246	19	141	15	263
876	0.0030747	10	145	15	280
877	0.0031658	15	147	18	279
878	0.003024	1	126	14	251
879	0.0028872	25	148	19	271
880	0.0027822	19	138	15	257
881	0.0031161	1	143	14	285
882	0.003127	9	140	19	271
883	0.0029657	17	138	17	259
884	0.002987	1	135	17	269
885	0.0028808	5	133	15	261
886	0.0030069	12	150	19	288
887	0.0030809	25	146	15	267
888	0.0030209	2	143	16	284
889	0.0032631	4	144	17	284
890	0.0030025	6	136	14	266
891	0.0030127	19	141	14	263
892	0.0029506	10	134	13	258
893	0.0032909	24	147	17	270
894	0.0031591	8	139	17	270
895	0.0032024	28	152	15	276
896	0.0030422	5	139	17	273
897	0.0031247	1	132	16	263
898	0.0033993	6	137	15	268
899	0.0031695	44	156	17	268
900	0.0032457	47	163	17	279
901	0.0029346	19	143	16	267
902	0.0029169	14	145	19	276
903	0.0030625	7	138	18	269
904	0.0032375	16	137	14	258
905	0.0029661	3	139	18	275
906	0.0029778	4	138	16	272
907	0.0031282	3	142	15	281
908	0.0031074	27	152	17	277
909	0.0030134	9	142	15	275
910	0.0028891	27	155	16	283
911	0.0029602	0	137	16	274
912	0.003058	1	134	14	267
913	0.003258	18	154	15	290
914	0.0026659	28	140	14	252
915	0.0031105	9	138	16	267
916	0.0028826	1	136	19	271
917	0.0031799	0	138	16	276
918	0.0029994	17	142	16	267
919	0.0030503	1	139	14	277
920	0.0028818	10	143	15	276
921	0.0030025	3	131	17	259
922	0.0028942	3	137	15	271
923	0.0029453	3	145	16	287
924	0.0031432	7	142	17	277
925	0.003114	20	146	17	272
926	0.0029654	6	138	14	270
927	0.0031052	0	134	14	268
928	0.0031761	2	140	18	278
929	0.0031352	17	141	14	265
930	0.0032797	17	143	18	269
931	0.0031214	3	141	16	279
932	0.0028379	40	162	18	284
933	0.0030328	19	150	17	281
934	0.0030257	7	143	16	279
935	0.0029148	10	143	15	276
936	0.0031554	32	152	14	272
937	0.0031827	12	146	16	280
938	0.002975	0	138	16	276
939	0.0030409	7	144	17	281
940	0.0029779	0	133	16	266
941	0.0032142	11	145	15	279
942	0.0030931	13	136	15	259
943	0.0029641	13	135	15	257
944	0.002911	18	145	15	272
945	0.0032195	12	137	14	262
946	0.0028561	7	146	16	285
947	0.0030467	3	139	19	275
948	0.0030482	6	138	14	270
949	0.0028846	6	142	16	278
950	0.0030775	8	132	16	256
951	0.0029354	9	134	13	259
952	0.0031868	7	137	16	267
953	0.0030287	8	137	18	266
954	0.0031049	5	142	13	279
955	0.0030301	9	141	17	273
956	0.0028615	18	139	18	260
957	0.0030964	12	135	15	258
958	0.0031048	13	146	17	279
959	0.003145	18	144	16	270
960	0.0028702	8	136	17	264
961	0.0031103	18	141	17	264
962	0.0029967	19	143	15	267
963	0.0030984	12	140	15	268
964	0.0029936	0	145	18	290
965	0.0032727	3	131	15	259
966	0.0029293	8	139	14	270
967	0.0033793	4	139	18	274
968	0.003247	2	142	17	282
969	0.0033382	34	160	17	286
970	0.0031064	0	124	15	248
971	0.0029821	8	140	18	272
972	0.003002	1	139	19	277
973	0.0030987	4	142	15	280
974	0.0030368	25	158	19	291
975	0.0029452	2	136	17	270
976	0.0029059	6	132	17	258
977	0.0031132	10	139	16	268
978	0.0031332	19	143	13	267
979	0.0029023	1	124	15	247
980	0.0029944	6	130	13	254
981	0.003268	0	142	16	284
982	0.003077	1	136	16	271
983	0.0032436	15	149	17	283
984	0.0035771	18	145	16	272
985	0.003231	12	144	18	276
986	0.0030874	5	137	15	269
987	0.0029173	21	153	19	285
988	0.0030092	1	132	18	263
989	0.003208	9	148	18	287
990	0.0030559	7	136	13	265
991	0.0030299	33	152	17	271
992	0.0030531	5	137	17	269
993	0.0029939	7	135	15	263
994	0.0032565	3	136	14	269
995	0.0031534	5	141	17	277
996	0.0029597	22	152	17	282
997	0.0032105	16	145	18	274
998	0.0031509	2	133	16	264
999	0.0030221	16	136	16	256
mean	0.00305741	11.833	141.104	16.143	270.375

## Sheet: PolyMin_Bal
	time	SEq	Bal	Reg	Egal
0	0.0030336	11	140	15	269
1	0.0030328	27	142	16	257
2	0.0030713	1	139	15	277
3	0.0029421	0	136	15	272
4	0.0028751	32	153	16	274
5	0.0030553	5	141	17	277
6	0.0029504	8	144	18	280
7	0.0030329	16	150	16	284
8	0.0031586	1	133	16	265
9	0.0028656	19	140	18	261
10	0.003152	15	147	18	279
11	0.003151	2	133	15	264
12	0.0032019	2	136	13	270
13	0.0030358	23	152	16	281
14	0.0027307	10	144	17	278
15	0.003197	24	143	17	262
16	0.0029198	28	150	16	272
17	0.0031677	12	137	14	262
18	0.0029322	6	140	15	274
19	0.0030927	7	139	14	271
20	0.0031473	10	142	18	274
21	0.0029533	2	137	15	272
22	0.0029807	1	135	17	269
23	0.0031042	14	129	14	244
24	0.0039027	3	136	15	269
25	0.002994	10	148	19	286
26	0.0027941	3	129	15	255
27	0.0032626	4	143	17	282
28	0.0028494	27	147	14	267
29	0.002967	5	128	14	251
30	0.0030554	6	131	13	256
31	0.0031811	7	140	19	273
32	0.0030555	12	135	18	258
33	0.0031034	0	131	17	262
34	0.0028739	10	143	15	276
35	0.0029607	21	142	17	263
36	0.0031922	29	156	15	283
37	0.0029862	17	140	17	263
38	0.0031044	23	146	14	269
39	0.0030931	32	153	15	274
40	0.0031593	10	136	13	262
41	0.0029315	11	132	16	253
42	0.0027671	6	140	17	274
43	0.0028335	11	139	15	267
44	0.0029483	12	142	18	272
45	0.0030929	1	132	19	263
46	0.0030179	1	134	18	267
47	0.0031122	11	141	15	271
48	0.0030995	32	150	15	268
49	0.0028796	4	138	15	272
50	0.0027976	18	145	18	272
51	0.0029101	19	150	18	281
52	0.0030682	5	135	18	265
53	0.0030724	21	142	17	263
54	0.0031241	16	144	16	272
55	0.0028357	18	140	17	262
56	0.002884	11	146	17	281
57	0.0030029	3	136	17	269
58	0.0028982	11	133	13	255
59	0.0032389	4	132	17	260
60	0.0030919	15	148	15	281
61	0.0029522	14	136	15	258
62	0.0031303	10	138	18	266
63	0.0030926	23	148	18	273
64	0.0030162	28	155	19	282
65	0.0029876	7	138	13	269
66	0.0030355	3	129	17	255
67	0.0031269	5	136	15	267
68	0.003592	32	154	17	276
69	0.0027156	13	149	17	285
70	0.0030797	6	138	14	270
71	0.0031502	30	154	17	278
72	0.002907	12	150	17	288
73	0.0031485	21	141	15	261
74	0.0028528	5	140	18	275
75	0.0028879	9	139	17	269
76	0.0030385	39	156	18	273
77	0.003254	9	141	15	273
78	0.0029987	5	138	14	271
79	0.0030218	22	151	18	280
80	0.0031038	3	131	14	259
81	0.0031667	14	148	17	282
82	0.0029245	18	146	19	274
83	0.0029547	12	139	16	266
84	0.003102	5	138	13	271
85	0.0032902	1	145	19	289
86	0.0028277	1	124	15	247
87	0.0030867	18	150	16	282
88	0.0030003	3	140	17	277
89	0.0028489	19	142	13	265
90	0.0029805	23	150	17	277
91	0.0030126	30	145	16	260
92	0.0028111	23	155	19	287
93	0.0031944	8	138	18	268
94	0.0029658	2	134	14	266
95	0.0033088	18	149	15	280
96	0.0030822	1	139	18	277
97	0.0033306	13	144	15	275
98	0.0030828	6	141	16	276
99	0.0030182	4	134	15	264
100	0.003067	5	138	15	271
101	0.0030011	17	141	15	265
102	0.0034012	0	139	16	278
103	0.002858	62	169	18	276
104	0.0030706	29	155	16	281
105	0.0028985	4	134	17	264
106	0.0030668	6	148	16	290
107	0.002584	6	136	17	266
108	0.0030925	2	132	17	262
109	0.0030239	15	151	16	287
110	0.0033581	42	159	18	276
111	0.003347	6	146	16	286
112	0.0027385	7	142	14	277
113	0.0031959	6	136	16	266
114	0.0030827	9	146	16	283
115	0.0031199	6	135	15	264
116	0.003126	2	130	15	258
117	0.0029443	7	138	15	269
118	0.0031086	13	141	13	269
119	0.0031323	19	139	14	259
120	0.0030536	13	138	16	263
121	0.0030857	10	139	17	268
122	0.0029365	1	132	17	263
123	0.0029306	5	128	17	251
124	0.0032224	8	143	19	278
125	0.002742	2	127	13	252
126	0.0028894	6	138	14	270
127	0.0031219	14	142	15	270
128	0.003021	0	133	16	266
129	0.0030898	40	159	16	278
130	0.0027135	12	138	15	264
131	0.0030112	3	130	16	257
132	0.0030602	2	143	15	284
133	0.0029572	18	134	13	250
134	0.0029976	15	148	17	281
135	0.0028789	2	137	16	272
136	0.0031176	11	137	14	263
137	0.0031294	13	132	16	251
138	0.0030957	29	155	19	281
139	0.0029001	0	131	15	262
140	0.00281	15	138	14	261
141	0.0030101	10	142	17	274
142	0.0030766	12	146	16	280
143	0.0031771	2	133	14	264
144	0.0029878	6	135	18	264
145	0.0030967	5	139	17	273
146	0.0030442	3	131	18	259
147	0.0031031	28	152	17	276
148	0.0029933	4	143	17	282
149	0.0043144	2	138	16	274
150	0.003027	2	140	15	278
151	0.0028501	3	133	14	263
152	0.0030637	9	140	15	271
153	0.00301	0	137	17	274
154	0.0029221	25	147	16	269
155	0.0033629	6	143	17	280
156	0.0029156	1	137	18	273
157	0.0028681	14	138	13	262
158	0.0032202	1	127	12	253
159	0.0029173	15	144	19	273
160	0.0030529	16	138	15	260
161	0.0030134	11	144	17	277
162	0.002934	19	148	17	277
163	0.0033065	0	141	17	282
164	0.0032924	13	144	16	275
165	0.0031113	3	136	19	269
166	0.0034718	22	155	17	288
167	0.0028563	15	142	16	269
168	0.0029635	7	149	19	291
169	0.002957	19	140	16	261
170	0.0030064	46	162	17	278
171	0.0030866	4	139	15	274
172	0.0038597	2	135	13	268
173	0.0030841	6	139	14	272
174	0.0029307	30	151	16	272
175	0.0029942	14	145	13	276
176	0.0030542	33	146	17	259
177	0.0029862	22	149	14	276
178	0.0028907	1	144	17	287
179	0.0031613	0	135	15	270
180	0.0028154	22	136	14	250
181	0.0029836	1	142	16	283
182	0.0029015	24	141	16	258
183	0.0029159	7	145	16	283
184	0.0028923	16	138	18	260
185	0.0029531	18	138	18	258
186	0.0029291	16	145	13	274
187	0.003107	7	127	15	247
188	0.0029563	48	171	18	294
189	0.0032793	3	137	15	271
190	0.0028965	17	132	16	247
191	0.0028993	4	138	18	272
192	0.0027036	12	137	17	262
193	0.0029404	14	146	16	278
194	0.0031635	1	137	16	273
195	0.0029145	13	136	15	259
196	0.0031295	13	134	15	255
197	0.0028377	13	140	17	267
198	0.0030066	37	156	16	275
199	0.0032463	25	150	15	275
200	0.0029163	10	133	14	256
201	0.0028564	27	150	19	273
202	0.003289	10	142	16	274
203	0.0032304	9	144	18	279
204	0.0030283	9	152	18	295
205	0.0028947	4	138	16	272
206	0.0028988	12	137	14	262
207	0.0031655	5	140	16	275
208	0.0030951	21	142	17	263
209	0.0030654	20	146	16	272
210	0.0029261	17	143	19	269
211	0.0029349	4	135	16	266
212	0.0031423	3	139	14	275
213	0.0031245	43	159	17	275
214	0.0031973	24	154	16	284
215	0.0031404	13	142	13	271
216	0.0030804	20	143	15	266
217	0.0031503	3	132	16	261
218	0.0029952	4	132	14	260
219	0.0030452	4	143	14	282
220	0.0030687	3	138	17	273
221	0.0029521	13	143	17	273
222	0.0029624	5	134	16	263
223	0.0028616	2	134	14	266
224	0.0030444	17	144	19	271
225	0.0031545	9	144	17	279
226	0.003014	27	152	19	277
227	0.0032	2	133	18	264
228	0.0030794	24	150	17	276
229	0.0029781	9	133	15	257
230	0.0034132	26	152	14	278
231	0.0031012	19	147	14	275
232	0.0028406	13	137	14	261
233	0.0031909	2	130	18	258
234	0.0028769	12	142	15	272
235	0.0029294	4	136	13	268
236	0.0032507	7	136	16	265
237	0.0031376	8	149	17	290
238	0.0028916	18	149	16	280
239	0.0029799	9	135	17	261
240	0.0031426	2	138	15	274
241	0.0029011	10	138	16	266
242	0.0032467	1	138	17	275
243	0.002967	20	152	19	284
244	0.0030974	5	138	16	271
245	0.0029261	4	132	15	260
246	0.0029466	14	139	16	264
247	0.0029735	15	147	15	279
248	0.0029207	5	135	15	265
249	0.0029986	9	144	19	279
250	0.0030827	18	146	19	274
251	0.0030452	8	135	15	262
252	0.0031089	24	156	19	288
253	0.0031616	5	131	15	257
254	0.0028896	39	158	15	277
255	0.0026837	3	146	17	289
256	0.0029697	1	134	17	267
257	0.0029661	7	135	14	263
258	0.002903	6	143	17	280
259	0.0028282	14	142	18	270
260	0.0030993	18	147	16	276
261	0.0030151	26	148	19	270
262	0.0031325	26	143	18	260
263	0.003091	2	134	17	266
264	0.0031559	14	139	19	264
265	0.0032181	3	139	17	275
266	0.0031276	2	135	16	268
267	0.0033234	5	147	17	289
268	0.0031063	17	143	15	269
269	0.0040664	12	135	17	258
270	0.0027152	20	147	16	274
271	0.0029169	2	144	16	286
272	0.0029388	13	143	16	273
273	0.003047	11	132	18	253
274	0.0031076	17	153	15	289
275	0.0029597	12	134	17	256
276	0.0036307	19	147	16	275
277	0.003022	33	149	18	265
278	0.0030856	13	139	14	265
279	0.0031267	10	151	17	292
280	0.0031596	19	155	19	291
281	0.0030481	12	147	17	282
282	0.0030218	6	143	18	280
283	0.0030684	12	130	16	248
284	0.0029402	2	138	14	274
285	0.0032167	6	138	17	270
286	0.0030446	10	143	14	276
287	0.0031063	1	136	15	271
288	0.0031617	9	142	19	275
289	0.0027003	4	136	15	268
290	0.0027909	26	155	17	284
291	0.0029403	21	152	17	283
292	0.0029548	3	136	18	269
293	0.0030126	1	128	14	255
294	0.0027034	3	142	19	281
295	0.0030271	8	143	17	278
296	0.0031179	13	142	16	271
297	0.0030436	7	133	18	259
298	0.003021	1	133	15	265
299	0.0029862	14	137	15	260
300	0.0030749	4	136	17	268
301	0.0029702	11	133	17	255
302	0.0031434	33	149	15	265
303	0.002954	2	129	17	256
304	0.0028727	8	142	16	276
305	0.0028141	3	139	17	275
306	0.0032492	20	147	15	274
307	0.0030943	3	139	18	275
308	0.0028844	4	145	18	286
309	0.0025691	23	147	18	271
310	0.0031253	11	140	16	269
311	0.0040334	30	157	16	284
312	0.0031151	4	142	16	280
313	0.00273	33	157	15	281
314	0.0029258	3	138	19	273
315	0.0030167	27	148	17	269
316	0.0030874	16	140	15	264
317	0.0029971	3	140	15	277
318	0.0032605	6	137	19	268
319	0.003105	17	137	15	257
320	0.0029898	12	137	18	262
321	0.0031321	1	135	17	269
322	0.0029439	7	138	14	269
323	0.0028458	17	146	19	275
324	0.00303	24	138	15	252
325	0.0028797	15	133	16	251
326	0.0031079	20	147	16	274
327	0.0028704	1	128	15	255
328	0.0036905	9	142	16	275
329	0.0030239	9	136	19	263
330	0.0030099	3	130	13	257
331	0.0029907	8	134	14	260
332	0.0029687	23	150	17	277
333	0.0031457	16	143	16	270
334	0.0033862	25	153	16	281
335	0.0030083	1	136	15	271
336	0.00296	6	136	15	266
337	0.0029759	7	139	16	271
338	0.0032688	33	155	19	277
339	0.0029221	13	137	15	261
340	0.0029841	23	143	17	263
341	0.0028804	12	148	17	284
342	0.0030769	6	139	14	272
343	0.0028815	43	161	15	279
344	0.0028276	1	137	19	273
345	0.0030836	9	139	17	269
346	0.0031602	6	131	18	256
347	0.0032374	12	140	18	268
348	0.0029071	1	134	15	267
349	0.0030199	33	162	16	291
350	0.0029393	39	164	19	289
351	0.0031424	11	142	17	273
352	0.0029639	12	142	17	272
353	0.0031002	12	142	14	272
354	0.003134	22	147	17	272
355	0.0029885	11	134	15	257
356	0.0031326	8	135	14	262
357	0.0030859	22	143	16	264
358	0.0028933	1	136	16	271
359	0.0031123	0	133	15	266
360	0.0031261	33	153	16	273
361	0.0028527	4	139	17	274
362	0.0032296	26	146	13	266
363	0.0029455	12	141	16	270
364	0.0030201	4	136	15	268
365	0.0030819	18	136	14	254
366	0.0029309	20	147	16	274
367	0.0031469	34	145	14	256
368	0.0030015	10	142	16	274
369	0.0026602	5	137	18	269
370	0.003057	2	142	17	282
371	0.0030216	8	139	19	270
372	0.0030284	15	141	15	267
373	0.0032815	0	141	16	282
374	0.0032324	10	146	16	282
375	0.0030951	18	143	15	268
376	0.0030696	5	143	17	281
377	0.0030542	10	141	16	272
378	0.0028891	5	129	15	253
379	0.0029562	17	147	19	277
380	0.0028246	7	144	18	281
381	0.0031787	5	141	15	277
382	0.0029274	21	141	13	261
383	0.0030674	18	147	16	276
384	0.0028215	24	145	15	266
385	0.0029543	11	139	16	267
386	0.0030376	12	136	13	260
387	0.0028923	6	130	14	254
388	0.0030998	9	145	17	281
389	0.0028352	5	137	15	269
390	0.0029746	17	141	18	265
391	0.0029361	10	139	16	268
392	0.0032728	9	138	15	267
393	0.0027712	20	138	18	256
394	0.0028923	4	136	17	268
395	0.0029804	0	130	13	260
396	0.0030775	23	145	17	267
397	0.0030235	7	135	15	263
398	0.002852	33	153	18	273
399	0.0029018	9	141	17	273
400	0.0030439	9	134	13	259
401	0.0029838	13	144	15	275
402	0.0030109	12	141	16	270
403	0.0030036	6	141	14	276
404	0.0034738	0	134	15	268
405	0.0030821	10	136	16	262
406	0.0031883	4	142	15	280
407	0.0029875	13	136	17	259
408	0.0030868	28	152	19	276
409	0.0031476	12	139	16	266
410	0.0029164	11	135	14	259
411	0.0032043	19	138	14	257
412	0.0029081	0	134	14	268
413	0.0030932	15	146	19	277
414	0.0027557	15	147	16	279
415	0.0031168	10	144	15	278
416	0.0031598	7	138	16	269
417	0.0031726	27	148	14	269
418	0.0029243	21	147	17	273
419	0.0031156	16	153	18	290
420	0.0030812	14	144	16	274
421	0.0030265	1	131	14	261
422	0.0031431	18	141	19	264
423	0.0031433	16	139	18	262
424	0.0030365	19	140	16	261
425	0.003048	18	147	17	276
426	0.0030769	16	146	16	276
427	0.0031875	18	142	13	266
428	0.0030273	23	143	16	263
429	0.003141	21	143	13	265
430	0.0029727	27	147	17	267
431	0.0030683	12	147	17	282
432	0.0029325	1	140	15	279
433	0.0030096	1	129	17	257
434	0.0030718	6	135	16	264
435	0.0030812	17	139	16	261
436	0.0030836	3	132	13	261
437	0.0030765	1	134	16	267
438	0.0032763	2	134	14	266
439	0.0030346	27	141	18	255
440	0.0030805	1	132	18	263
441	0.0030773	21	144	15	267
442	0.0029054	17	136	17	255
443	0.0030201	11	137	14	263
444	0.0029126	4	131	15	258
445	0.0029921	8	134	14	260
446	0.0032363	4	138	16	272
447	0.0031403	10	137	13	264
448	0.0028834	36	154	15	272
449	0.0030817	1	135	19	269
450	0.0029015	14	145	18	276
451	0.0030107	0	133	16	266
452	0.0031303	9	143	17	277
453	0.002937	21	144	17	267
454	0.0030505	4	142	16	280
455	0.0029283	1	134	14	267
456	0.002944	14	147	18	280
457	0.0032473	6	137	17	268
458	0.0029109	1	132	15	263
459	0.0028712	1	139	16	277
460	0.0029295	0	134	15	268
461	0.0028765	12	142	18	272
462	0.0030065	15	146	17	277
463	0.0030686	26	144	17	262
464	0.0031735	16	142	16	268
465	0.0032805	7	137	16	267
466	0.0029479	1	143	16	285
467	0.0029447	2	141	17	280
468	0.0031715	2	138	18	274
469	0.0031201	8	134	19	260
470	0.0031446	23	147	18	271
471	0.0031963	22	148	15	274
472	0.0032811	1	131	17	261
473	0.0031792	2	140	19	278
474	0.003898	5	135	14	265
475	0.0027221	3	127	13	251
476	0.0030653	29	152	18	275
477	0.0031787	13	141	14	269
478	0.0029706	6	138	16	270
479	0.0029469	21	147	16	273
480	0.0029126	9	137	16	265
481	0.003034	3	128	17	253
482	0.0030815	30	146	15	262
483	0.0029628	3	133	14	263
484	0.0032225	12	139	19	266
485	0.0030558	8	137	15	266
486	0.0032628	12	136	16	260
487	0.0031812	6	139	14	272
488	0.0029989	13	142	16	271
489	0.0030432	29	144	14	259
490	0.0030387	14	139	16	264
491	0.0035936	29	151	17	273
492	0.0031047	24	144	19	264
493	0.0031986	29	159	18	289
494	0.0030286	17	143	18	269
495	0.0032794	13	144	17	275
496	0.0031204	27	149	16	271
497	0.0030676	34	154	16	274
498	0.0030507	2	147	17	292
499	0.0030415	3	138	14	273
500	0.0032566	12	141	15	270
501	0.0028883	15	141	15	267
502	0.0031706	27	142	17	257
503	0.0028874	3	135	16	267
504	0.0030785	21	150	14	279
505	0.0029892	5	133	18	261
506	0.0029407	18	146	17	274
507	0.0031738	7	141	15	275
508	0.0030203	6	146	19	286
509	0.0029855	2	133	16	264
510	0.0029545	4	143	16	282
511	0.0028595	20	146	16	272
512	0.0029844	29	145	16	261
513	0.002872	1	126	18	251
514	0.0031621	10	136	13	262
515	0.0032147	28	146	19	264
516	0.0032793	8	142	15	276
517	0.0032622	4	135	14	266
518	0.0029265	19	141	16	263
519	0.0029646	2	134	13	266
520	0.0030229	24	155	18	286
521	0.0031589	10	133	14	256
522	0.002966	17	144	15	271
523	0.0029579	0	137	17	274
524	0.0030538	8	135	16	262
525	0.0031372	2	135	15	268
526	0.002939	25	151	17	277
527	0.0030588	21	148	16	275
528	0.0030888	25	137	16	249
529	0.0028885	36	151	18	266
530	0.0029035	5	142	17	279
531	0.0030905	6	139	17	272
532	0.002941	25	141	13	257
533	0.0031368	22	146	17	270
534	0.003032	1	136	16	271
535	0.0028389	4	135	15	266
536	0.0031784	1	140	19	279
537	0.0030259	0	127	14	254
538	0.0032409	4	129	14	254
539	0.0029899	1	142	16	283
540	0.0031466	7	141	16	275
541	0.0029102	8	132	15	256
542	0.0028948	6	142	16	278
543	0.0031937	27	152	16	277
544	0.002951	11	144	18	277
545	0.0029287	22	146	15	270
546	0.0026293	1	129	15	257
547	0.0031079	22	149	17	276
548	0.0030774	15	141	16	267
549	0.0031219	27	146	17	265
550	0.0030771	12	138	16	264
551	0.0029645	3	139	18	275
552	0.0030952	4	136	15	268
553	0.003089	12	138	19	264
554	0.002913	31	153	19	275
555	0.0033893	13	141	14	269
556	0.0029037	0	127	13	254
557	0.002912	14	134	17	254
558	0.0030082	2	146	16	290
559	0.0028842	12	140	17	268
560	0.0034335	15	143	16	271
561	0.0026297	11	145	19	279
562	0.0030971	5	145	17	285
563	0.0030723	14	139	16	264
564	0.0030065	50	167	18	284
565	0.003222	5	139	15	273
566	0.0030534	0	136	19	272
567	0.0030738	33	156	19	279
568	0.002877	3	132	15	261
569	0.0032448	0	137	14	274
570	0.0029368	13	137	15	261
571	0.0031746	5	139	17	273
572	0.0028115	8	137	17	266
573	0.0032481	6	139	18	272
574	0.0031654	13	149	16	285
575	0.0031781	22	147	19	272
576	0.0029998	9	146	15	283
577	0.0029823	13	138	15	263
578	0.0029347	27	150	16	273
579	0.0033464	9	141	15	273
580	0.0031083	6	137	15	268
581	0.0031776	12	142	16	272
582	0.002841	4	136	18	268
583	0.002848	12	137	15	262
584	0.0029864	18	139	19	260
585	0.0035337	9	135	16	261
586	0.0030461	1	137	15	273
587	0.0031951	1	132	14	263
588	0.0029308	12	134	14	256
589	0.0030568	2	131	16	260
590	0.0031333	32	148	14	264
591	0.0029454	27	157	16	287
592	0.003035	14	140	15	266
593	0.0030423	47	160	18	273
594	0.0029694	8	135	19	262
595	0.0029514	9	134	14	259
596	0.0030631	5	147	16	289
597	0.0030968	10	143	17	276
598	0.0030969	17	141	18	265
599	0.003002	26	150	17	274
600	0.003157	23	153	18	283
601	0.0030078	0	129	16	258
602	0.0031976	10	138	16	266
603	0.0031476	15	148	18	281
604	0.0030622	17	133	15	249
605	0.0028547	17	139	16	261
606	0.0031314	0	132	18	264
607	0.0029651	15	136	16	257
608	0.0035581	13	135	17	257
609	0.0029845	28	151	19	274
610	0.0032006	32	150	15	268
611	0.0027593	26	147	18	268
612	0.003057	2	144	19	286
613	0.0029444	45	158	15	271
614	0.0031885	36	154	18	272
615	0.0029828	11	144	19	277
616	0.0030886	24	140	18	256
617	0.0029902	36	158	16	280
618	0.003013	16	143	18	270
619	0.0031909	5	135	15	265
620	0.0034085	19	150	17	281
621	0.0030021	12	140	18	268
622	0.0034223	8	146	15	284
623	0.0031785	26	153	15	280
624	0.0030196	7	138	14	269
625	0.002892	16	147	18	278
626	0.0031003	5	136	17	267
627	0.0031109	12	141	19	270
628	0.0029336	6	138	16	270
629	0.0028867	7	140	16	273
630	0.0031152	3	137	15	271
631	0.0032918	3	141	18	279
632	0.0029734	25	151	18	277
633	0.0030985	5	134	17	263
634	0.0032286	35	159	15	283
635	0.0030966	27	150	16	273
636	0.0030594	1	140	19	279
637	0.0029475	7	126	17	245
638	0.0030441	3	132	17	261
639	0.0029997	2	141	16	280
640	0.0029385	1	144	17	287
641	0.0031423	10	143	15	276
642	0.0030082	4	141	17	278
643	0.0030603	20	146	19	272
644	0.0029607	6	131	15	256
645	0.0029843	6	134	14	262
646	0.0030474	9	137	16	265
647	0.0031045	11	143	16	275
648	0.0031262	26	142	16	258
649	0.0032032	1	141	15	281
650	0.0030246	26	148	17	270
651	0.002987	21	142	15	263
652	0.0028193	14	134	14	254
653	0.0032396	0	134	16	268
654	0.0031266	11	139	13	267
655	0.0029242	14	145	16	276
656	0.0029865	1	128	14	255
657	0.0029725	10	142	18	274
658	0.0031452	8	138	18	268
659	0.0030676	28	152	15	276
660	0.0033564	0	137	15	274
661	0.0031246	13	143	14	273
662	0.0030131	4	143	16	282
663	0.0029941	9	142	17	275
664	0.002891	6	143	17	280
665	0.0031745	2	131	16	260
666	0.0030086	3	136	18	269
667	0.0031009	29	153	16	277
668	0.0031298	25	156	16	287
669	0.0029278	9	143	15	277
670	0.0029964	13	141	15	269
671	0.0032142	15	136	15	257
672	0.0031358	8	140	15	272
673	0.0031133	23	145	17	267
674	0.0028639	9	139	14	269
675	0.0031682	5	146	17	287
676	0.002964	7	133	16	259
677	0.0030058	3	138	15	273
678	0.003026	8	136	17	264
679	0.0030065	1	139	16	277
680	0.0029119	15	147	18	279
681	0.0030674	10	133	14	256
682	0.0030896	3	124	13	245
683	0.0030524	3	135	14	267
684	0.0031851	2	130	13	258
685	0.0032729	6	137	17	268
686	0.0028936	5	134	16	263
687	0.0032292	43	163	18	283
688	0.0030133	2	136	15	270
689	0.00328	1	140	18	279
690	0.0030875	2	132	14	262
691	0.0029303	6	135	15	264
692	0.0029778	0	137	14	274
693	0.0029521	13	144	15	275
694	0.0029554	41	152	18	263
695	0.0027936	15	144	17	273
696	0.0030641	9	136	15	263
697	0.0029061	6	141	15	276
698	0.0033552	15	141	18	267
699	0.0029597	9	132	15	255
700	0.0029128	3	131	15	259
701	0.0030713	6	134	18	262
702	0.0029953	8	132	16	256
703	0.0031442	23	151	18	279
704	0.0032652	2	142	17	282
705	0.0030277	13	142	16	271
706	0.0031456	27	146	17	265
707	0.002981	4	147	16	290
708	0.0028758	8	145	16	282
709	0.002936	10	150	19	290
710	0.0030578	14	143	15	272
711	0.0031298	4	139	18	274
712	0.0028291	3	141	19	279
713	0.0029628	24	149	18	274
714	0.0031768	17	147	19	277
715	0.0029347	2	128	15	254
716	0.0029718	3	132	17	261
717	0.0029947	5	131	18	257
718	0.0032732	1	142	15	283
719	0.0029714	21	146	17	271
720	0.0028999	33	162	19	291
721	0.0033203	16	142	19	268
722	0.0031537	12	139	17	266
723	0.0032778	18	144	18	270
724	0.0030249	14	141	17	268
725	0.0030366	3	135	17	267
726	0.0031165	4	138	17	272
727	0.0030047	7	139	16	271
728	0.0030714	5	134	18	263
729	0.0029765	15	142	15	269
730	0.0029152	23	146	17	269
731	0.0030877	28	152	18	276
732	0.0030462	15	148	16	281
733	0.0028463	5	136	15	267
734	0.0029275	3	127	15	251
735	0.003208	8	135	18	262
736	0.0031602	2	137	16	272
737	0.0030041	19	142	14	265
738	0.0032893	4	142	17	280
739	0.0030212	6	133	17	260
740	0.0031162	1	134	16	267
741	0.0032105	4	135	14	266
742	0.0030745	23	145	13	267
743	0.0030591	8	141	17	274
744	0.0030132	11	148	15	285
745	0.0029484	9	139	17	269
746	0.0031043	6	141	16	276
747	0.0029419	5	142	15	279
748	0.0028336	12	147	16	282
749	0.0029901	5	138	15	271
750	0.0029319	2	140	17	278
751	0.0030744	9	140	13	271
752	0.0030266	8	140	19	272
753	0.0030257	16	141	18	266
754	0.0028664	14	143	18	272
755	0.003028	18	145	18	272
756	0.0028474	3	135	16	267
757	0.0030455	1	137	16	273
758	0.002859	4	145	19	286
759	0.0029523	30	150	15	270
760	0.0031488	0	130	13	260
761	0.0028858	11	145	17	279
762	0.0030414	4	134	16	264
763	0.003031	12	134	14	256
764	0.0027753	3	142	16	281
765	0.0032019	0	135	18	270
766	0.0034114	17	149	16	281
767	0.0030414	34	155	18	276
768	0.0033202	1	132	15	263
769	0.0030839	3	131	18	259
770	0.0029947	10	132	18	254
771	0.0029581	6	132	14	258
772	0.0031067	0	134	16	268
773	0.0032114	2	143	18	284
774	0.0030379	8	133	18	258
775	0.0029672	35	154	19	273
776	0.0030368	4	134	16	264
777	0.0029502	25	152	18	279
778	0.0029382	45	161	17	277
779	0.0030768	10	139	17	268
780	0.0031132	13	141	16	269
781	0.0028359	15	137	16	259
782	0.0030209	5	140	17	275
783	0.0028507	24	151	17	278
784	0.0029828	24	147	15	270
785	0.0030381	5	140	16	275
786	0.0030648	4	136	16	268
787	0.0030964	17	145	14	273
788	0.0032652	6	138	15	270
789	0.0033221	2	129	13	256
790	0.0028928	19	141	14	263
791	0.0028189	6	134	15	262
792	0.0028716	9	138	18	267
793	0.0030997	28	154	17	280
794	0.0030089	39	157	19	275
795	0.0030907	16	140	17	264
796	0.0042918	2	130	17	258
797	0.0029556	2	135	17	268
798	0.0032992	6	140	14	274
799	0.0032804	27	148	18	269
800	0.0030507	10	133	13	256
801	0.0028315	5	129	19	253
802	0.003	10	138	14	266
803	0.002978	39	166	19	293
804	0.0028734	6	133	18	260
805	0.0029894	18	144	18	270
806	0.0032189	2	128	18	254
807	0.0030146	1	137	18	273
808	0.0030235	8	136	17	264
809	0.003081	0	131	17	262
810	0.0028572	5	146	15	287
811	0.0028734	31	154	18	277
812	0.0031143	8	144	16	280
813	0.0030283	1	136	15	271
814	0.0031121	1	141	15	281
815	0.0031339	8	136	15	264
816	0.0031718	7	134	18	261
817	0.002945	7	135	13	263
818	0.0030226	3	134	17	265
819	0.0031032	2	137	18	272
820	0.0030358	1	128	16	255
821	0.003084	5	131	17	257
822	0.003008	11	139	14	267
823	0.0030518	19	144	14	269
824	0.0032084	5	132	15	259
825	0.0030742	0	143	15	286
826	0.0031775	3	141	16	279
827	0.0029196	17	139	17	261
828	0.00293	22	136	14	250
829	0.0031969	2	137	14	272
830	0.0032084	11	140	15	269
831	0.0030383	19	137	14	255
832	0.0031698	28	147	16	266
833	0.0032004	3	140	16	277
834	0.0031367	6	134	15	262
835	0.0030979	38	158	17	278
836	0.0032171	32	149	16	266
837	0.0028822	3	138	17	273
838	0.0029195	20	147	18	274
839	0.0028137	18	149	17	280
840	0.0031021	34	153	18	272
841	0.0032176	25	151	18	277
842	0.0029509	2	138	16	274
843	0.0029482	6	140	16	274
844	0.0030443	3	133	18	263
845	0.0029901	2	139	16	276
846	0.0030611	16	147	18	278
847	0.0031008	2	129	16	256
848	0.0029482	12	138	15	264
849	0.0029662	9	144	19	279
850	0.0030955	0	133	17	266
851	0.003455	6	141	19	276
852	0.003003	19	145	18	271
853	0.0030622	4	139	14	274
854	0.0031581	21	149	16	277
855	0.0028867	2	128	13	254
856	0.0031147	4	138	17	272
857	0.0029842	1	131	15	261
858	0.0031463	14	146	18	278
859	0.0032921	6	151	17	296
860	0.0027142	7	134	18	261
861	0.0030822	13	134	14	255
862	0.0031861	3	142	17	281
863	0.0032168	2	140	17	278
864	0.003046	1	138	14	275
865	0.0029865	11	145	18	279
866	0.0028143	10	146	16	282
867	0.0029658	43	164	19	285
868	0.002861	6	138	15	270
869	0.0030852	3	134	18	265
870	0.0030202	12	142	17	272
871	0.0030973	7	142	17	277
872	0.0030371	33	143	16	253
873	0.0026009	29	150	18	271
874	0.002964	13	139	15	265
875	0.0029469	19	141	15	263
876	0.0031159	10	145	15	280
877	0.0032389	15	147	18	279
878	0.0028028	1	126	14	251
879	0.002874	25	148	19	271
880	0.0031306	19	138	15	257
881	0.0031505	1	143	14	285
882	0.0030999	9	140	19	271
883	0.002816	17	138	17	259
884	0.0029007	1	135	17	269
885	0.0030762	5	133	15	261
886	0.0030795	12	150	19	288
887	0.0031154	25	146	15	267
888	0.0031316	2	143	16	284
889	0.0031156	4	144	17	284
890	0.0035418	6	136	14	266
891	0.0030688	19	141	14	263
892	0.0030615	10	134	13	258
893	0.0031693	24	147	17	270
894	0.0030066	8	139	17	270
895	0.0031636	28	152	15	276
896	0.0035963	11	137	18	263
897	0.002984	1	132	16	263
898	0.0030443	6	137	15	268
899	0.0032586	44	156	17	268
900	0.0033326	47	163	17	279
901	0.0030886	19	143	16	267
902	0.00298	14	145	19	276
903	0.0032691	7	138	18	269
904	0.0032283	16	137	14	258
905	0.0032946	3	139	18	275
906	0.002981	4	138	16	272
907	0.003134	3	142	15	281
908	0.0031335	27	152	17	277
909	0.0030971	9	142	15	275
910	0.0029306	27	155	16	283
911	0.0029017	0	137	16	274
912	0.0031239	1	134	14	267
913	0.0032467	18	154	15	290
914	0.0026694	28	140	14	252
915	0.0031596	9	138	16	267
916	0.0028068	1	136	19	271
917	0.0032398	13	135	19	257
918	0.0031638	17	142	16	267
919	0.002976	1	139	14	277
920	0.0028106	10	143	15	276
921	0.0028475	3	131	17	259
922	0.0032249	3	137	15	271
923	0.0032017	3	145	16	287
924	0.0031209	7	142	17	277
925	0.0030365	20	146	17	272
926	0.0033109	6	138	14	270
927	0.0031237	0	134	14	268
928	0.0031316	2	140	18	278
929	0.0030688	17	141	14	265
930	0.0030927	17	143	18	269
931	0.0031048	3	141	16	279
932	0.0030082	40	162	18	284
933	0.0029985	19	150	17	281
934	0.0031631	7	143	16	279
935	0.0030259	10	143	15	276
936	0.0031037	32	152	14	272
937	0.002888	12	146	16	280
938	0.0030481	0	138	16	276
939	0.0031138	7	144	17	281
940	0.0030383	0	133	16	266
941	0.0030555	11	145	15	279
942	0.0030894	13	136	15	259
943	0.0028945	13	135	15	257
944	0.0028905	18	145	15	272
945	0.0030676	12	137	14	262
946	0.0029195	7	146	16	285
947	0.0030766	3	139	19	275
948	0.0030477	6	138	14	270
949	0.0028542	6	142	16	278
950	0.0029818	8	132	16	256
951	0.0029529	9	134	13	259
952	0.0030876	7	137	16	267
953	0.0030629	8	137	18	266
954	0.0029516	5	142	13	279
955	0.0029212	9	141	17	273
956	0.0029194	18	139	18	260
957	0.0033569	12	135	15	258
958	0.0031144	13	145	18	277
959	0.0029521	18	144	16	270
960	0.0029705	8	136	17	264
961	0.0030336	18	141	17	264
962	0.0030304	19	143	15	267
963	0.0029696	12	140	15	268
964	0.0031462	0	145	18	290
965	0.0030473	3	131	15	259
966	0.0029199	8	139	14	270
967	0.003072	4	139	18	274
968	0.0030394	7	136	19	265
969	0.0035486	34	160	17	286
970	0.0030318	0	124	15	248
971	0.0031853	8	140	18	272
972	0.002881	1	139	19	277
973	0.0031649	4	142	15	280
974	0.0029434	25	158	19	291
975	0.00303	2	136	17	270
976	0.0029828	6	132	17	258
977	0.0032626	10	139	16	268
978	0.0030478	19	143	13	267
979	0.0031036	1	124	15	247
980	0.0029605	6	130	13	254
981	0.0033155	0	142	16	284
982	0.0031551	1	136	16	271
983	0.0032046	15	149	17	283
984	0.0031727	18	145	16	272
985	0.0030792	12	144	18	276
986	0.0030813	5	137	15	269
987	0.0030583	21	153	19	285
988	0.0029968	1	132	18	263
989	0.0031273	9	148	18	287
990	0.0031347	7	136	13	265
991	0.002957	33	152	17	271
992	0.00296	5	137	17	269
993	0.0029277	7	132	15	257
994	0.0032182	3	136	14	269
995	0.0027408	5	141	17	277
996	0.0030271	22	152	17	282
997	0.0031472	16	145	18	274
998	0.0030116	2	133	16	264
999	0.002888	16	136	16	256
mean	0.00305101	11.963	140.988	16.182	270.013

## Sheet: DACC_D
	time	SEq	Bal	Reg	Egal
0	0.0005759	11	140	15	269
1	0.0006099	7	137	17	267
2	0.0005372	49	167	18	285
3	0.000582	10	146	15	282
4	0.000681	13	144	18	275
5	0.0005652	27	155	19	283
6	0.0006424	14	151	17	288
7	0.0005109	38	158	17	278
8	0.0006384	56	171	19	286
9	0.0005602	19	140	18	261
10	0.0007585	15	147	18	279
11	0.0006176	17	143	18	269
12	0.00067	2	136	13	270
13	0.0005534	53	169	18	285
14	0.0006152	10	144	17	278
15	0.000742	13	143	19	273
16	0.0005938	2	138	16	274
17	0.0005283	67	177	16	287
18	0.0005849	22	147	15	272
19	0.0006417	7	139	14	271
20	0.000611	25	151	16	277
21	0.0005877	10	143	15	276
22	0.0005323	18	145	16	272
23	0.0005515	32	140	14	248
24	0.0007809	14	147	17	280
25	0.0006422	10	148	19	286
26	0.0005723	3	129	15	255
27	0.0007001	19	154	17	289
28	0.0007258	14	144	15	274
29	0.0005026	34	146	18	258
30	0.0005575	6	131	13	256
31	0.0005723	7	140	19	273
32	0.0007023	34	150	19	266
33	0.0005405	0	131	17	262
34	0.0006687	39	159	16	279
35	0.0006121	36	152	19	268
36	0.0006373	10	149	15	288
37	0.0005791	17	140	17	263
38	0.0006479	23	146	14	269
39	0.0005849	43	159	15	275
40	0.0005837	34	155	19	276
41	0.0005817	21	141	16	261
42	0.0005694	6	140	17	274
43	0.0005314	11	139	15	267
44	0.0006112	22	147	18	272
45	0.0006289	19	144	19	269
46	0.000657	47	168	19	289
47	0.0008981	22	150	15	278
48	0.0005516	32	150	15	268
49	0.0006316	15	146	15	277
50	0.0006674	27	152	18	277
51	0.0007988	34	153	19	272
52	0.0005543	9	140	17	271
53	0.0005244	47	160	17	273
54	0.0006357	27	151	16	275
55	0.0005929	18	140	17	262
56	0.0006599	16	149	17	282
57	0.0005997	9	142	16	275
58	0.0006285	11	133	13	255
59	0.0006072	4	132	17	260
60	0.0006546	6	144	17	282
61	0.0006331	44	156	17	268
62	0.0005253	40	155	18	270
63	0.000613	1	142	18	283
64	0.0005547	46	165	19	284
65	0.0005875	10	144	19	278
66	0.0005936	3	129	17	255
67	0.0005507	43	162	17	281
68	0.0005327	66	178	19	290
69	0.0006746	13	149	17	285
70	0.0005864	6	138	14	270
71	0.0006076	9	144	17	279
72	0.0006085	44	168	18	292
73	0.0005129	39	148	16	257
74	0.0005967	32	157	18	282
75	0.0005479	11	139	17	267
76	0.000653	20	147	18	274
77	0.000549	28	152	19	276
78	0.0007114	43	164	18	285
79	0.0006248	22	151	18	280
80	0.000556	22	141	15	260
81	0.0006158	23	155	17	287
82	0.0006126	18	146	19	274
83	0.0005617	12	139	16	266
84	0.0006168	29	154	13	279
85	0.0005926	28	161	19	294
86	0.0004997	19	133	15	247
87	0.0006172	18	149	16	280
88	0.000746	4	139	19	274
89	0.0005313	26	146	13	266
90	0.000607	23	150	17	277
91	0.0005877	6	135	16	264
92	0.0005806	42	165	19	288
93	0.0006199	13	144	18	275
94	0.0006185	27	148	18	269
95	0.0006658	10	147	15	284
96	0.0006258	16	149	18	282
97	0.000737	37	157	18	277
98	0.0005984	20	150	16	280
99	0.0005795	4	134	15	264
100	0.0007057	15	144	15	273
101	0.0005039	32	151	15	270
102	0.0005294	56	170	18	284
103	0.0006731	41	161	18	281
104	0.0005698	57	170	18	283
105	0.0005203	4	134	17	264
106	0.0006323	6	148	16	290
107	0.0006236	6	136	17	266
108	0.0006218	26	145	17	264
109	0.0006266	15	151	16	287
110	0.0005513	61	169	18	277
111	0.0005974	43	167	18	291
112	0.0006146	7	142	14	277
113	0.0005991	3	137	16	271
114	0.0005665	39	162	16	285
115	0.0005981	10	138	15	266
116	0.0005605	13	137	15	261
117	0.0005414	35	155	15	275
118	0.0005901	14	143	13	272
119	0.0005814	9	135	14	261
120	0.0005837	0	132	16	264
121	0.000545	8	139	16	270
122	0.0005447	1	132	17	263
123	0.0005076	22	138	17	254
124	0.000614	8	143	19	278
125	0.000578	2	127	13	252
126	0.0006101	12	141	14	270
127	0.0005876	35	160	18	285
128	0.0005558	0	133	16	266
129	0.0007872	13	149	16	285
130	0.0005347	12	138	15	264
131	0.000548	26	146	16	266
132	0.0006036	8	147	15	286
133	0.0005156	42	151	19	260
134	0.000686	2	143	18	284
135	0.0006783	23	148	16	273
136	0.000695	11	137	14	263
137	0.0005917	13	132	16	251
138	0.0005877	43	165	18	287
139	0.0005729	12	138	15	264
140	0.0004955	44	153	14	262
141	0.0006587	24	146	17	268
142	0.0006705	6	142	16	278
143	0.0005411	9	136	15	263
144	0.0006017	33	154	19	275
145	0.0005944	15	146	17	277
146	0.0005524	3	131	18	259
147	0.0005372	86	191	19	296
148	0.0006391	18	155	18	292
149	0.0005778	2	138	16	274
150	0.0005633	2	140	15	278
151	0.0005763	3	133	14	263
152	0.0005614	42	155	18	268
153	0.0006049	8	141	17	274
154	0.0007532	25	147	16	269
155	0.0005721	36	162	17	288
156	0.0006026	5	139	18	273
157	0.000511	14	138	13	262
158	0.0005642	18	140	18	262
159	0.0006138	27	151	19	275
160	0.0005489	44	155	15	266
161	0.0005862	0	138	18	276
162	0.0006434	19	148	17	277
163	0.0006384	10	151	17	292
164	0.0005697	62	175	17	288
165	0.0006482	36	154	18	272
166	0.0006695	37	160	19	283
167	0.0005816	15	144	18	273
168	0.0006726	17	154	19	291
169	0.000564	19	140	16	261
170	0.0005726	46	162	17	278
171	0.0005284	63	176	19	289
172	0.0005939	2	135	13	268
173	0.000636	30	152	18	274
174	0.0005699	18	148	16	278
175	0.0006429	10	146	13	282
176	0.0005444	23	142	17	261
177	0.0005599	22	149	14	276
178	0.0007573	9	146	17	283
179	0.0005669	11	143	15	275
180	0.0006127	22	136	14	250
181	0.0007115	19	151	16	283
182	0.0004922	24	141	16	258
183	0.0006022	11	148	16	285
184	0.0005417	27	149	17	271
185	0.0006419	18	138	18	258
186	0.0005813	46	160	17	274
187	0.0004902	26	138	15	250
188	0.0006461	48	171	18	294
189	0.0005397	23	145	17	267
190	0.0004973	28	141	16	254
191	0.0006637	29	155	19	281
192	0.0006378	12	137	17	262
193	0.0005708	45	163	16	281
194	0.0005713	31	154	15	277
195	0.0005378	13	136	15	259
196	0.0005393	13	134	15	255
197	0.0005861	13	140	17	267
198	0.0005814	27	154	17	281
199	0.0005599	34	156	14	278
200	0.000646	27	142	15	257
201	0.0006198	15	145	18	275
202	0.0006391	13	145	16	277
203	0.0005544	32	158	18	284
204	0.0007156	14	152	18	290
205	0.0006038	4	138	16	272
206	0.0005994	12	137	14	262
207	0.0006612	41	161	16	281
208	0.0005196	41	152	16	263
209	0.0005686	55	170	19	285
210	0.0006338	12	142	19	272
211	0.0006558	17	143	16	269
212	0.0005277	29	151	17	273
213	0.0007179	25	156	19	287
214	0.0006109	17	155	16	293
215	0.0006574	13	142	13	271
216	0.000577	20	143	15	266
217	0.0005187	12	137	16	262
218	0.0005296	17	140	14	263
219	0.0006379	21	156	19	291
220	0.0006552	9	142	17	275
221	0.0005828	14	145	19	276
222	0.0005715	14	140	16	266
223	0.0005768	2	134	14	266
224	0.000701	17	144	19	271
225	0.000756	35	157	18	279
226	0.0005936	7	144	19	281
227	0.0005338	2	133	18	264
228	0.0006552	16	147	17	278
229	0.0005179	9	133	15	257
230	0.0006101	64	181	16	298
231	0.0005693	32	148	16	264
232	0.0005587	30	146	17	262
233	0.0005388	19	142	18	265
234	0.0006503	12	142	15	272
235	0.0006355	4	136	13	268
236	0.0006001	26	150	16	274
237	0.0006432	8	149	17	290
238	0.0006237	22	151	16	280
239	0.0005887	11	138	18	265
240	0.0006395	13	146	18	279
241	0.0005858	10	138	16	266
242	0.000585	17	148	17	279
243	0.0007406	10	151	19	292
244	0.0005826	5	138	16	271
245	0.0005736	4	132	15	260
246	0.00059	14	139	16	264
247	0.0005715	61	171	17	281
248	0.0005647	29	152	19	275
249	0.0006163	17	149	17	281
250	0.0006084	0	138	16	276
251	0.0005806	19	140	15	261
252	0.0006288	28	162	18	296
253	0.0005343	25	143	16	261
254	0.0007081	19	151	18	283
255	0.000622	3	146	17	289
256	0.0006103	14	145	16	276
257	0.0005919	7	135	14	263
258	0.0005903	33	150	17	267
259	0.0005679	14	142	18	270
260	0.0005598	22	151	17	280
261	0.0005828	23	149	17	275
262	0.000591	10	137	18	264
263	0.0007106	2	134	17	266
264	0.0005655	36	158	18	280
265	0.000624	26	154	18	282
266	0.0006561	17	144	16	271
267	0.0005319	53	174	18	295
268	0.0005324	36	153	15	270
269	0.0006262	40	158	17	276
270	0.0007077	20	147	16	274
271	0.000609	23	149	18	275
272	0.0006503	13	145	17	277
273	0.0005748	7	131	17	255
274	0.0006065	46	171	18	296
275	0.0006582	1	131	17	261
276	0.0006417	19	147	16	275
277	0.0006077	14	141	18	268
278	0.0005576	48	162	18	276
279	0.0005221	64	169	18	274
280	0.0006308	19	155	19	291
281	0.0006116	1	143	17	285
282	0.000589	14	149	17	284
283	0.0005466	56	164	19	272
284	0.0005815	7	139	18	271
285	0.0005621	26	149	17	272
286	0.0005973	10	143	14	276
287	0.0006136	11	140	16	269
288	0.0006737	38	162	18	286
289	0.0006202	4	136	15	268
290	0.0007565	13	150	17	287
291	0.000674	7	146	18	285
292	0.0005712	8	139	18	270
293	0.0005211	1	128	14	255
294	0.000651	3	142	19	281
295	0.0005835	9	146	17	283
296	0.0005685	13	142	16	271
297	0.0006318	1	139	17	277
298	0.0006484	22	146	15	270
299	0.0006306	57	168	18	279
300	0.0006282	33	153	18	273
301	0.0005341	11	133	17	255
302	0.0006239	9	138	15	267
303	0.0006078	2	129	17	256
304	0.0006559	8	142	16	276
305	0.0006408	3	139	17	275
306	0.0005841	69	179	19	289
307	0.0005637	3	139	18	275
308	0.0006606	4	145	18	286
309	0.0007477	23	147	18	271
310	0.0006189	72	180	18	288
311	0.0005803	37	160	18	283
312	0.0006282	4	142	16	280
313	0.000602	41	161	15	281
314	0.0005386	21	150	19	279
315	0.0006194	10	141	17	272
316	0.0005754	9	137	15	265
317	0.0005525	30	150	15	270
318	0.0005673	18	145	18	272
319	0.0006229	7	133	15	259
320	0.0005628	12	137	18	262
321	0.0006118	30	150	18	270
322	0.0005647	5	134	14	263
323	0.0006817	17	146	19	275
324	0.0005344	12	135	19	258
325	0.0005673	15	133	16	251
326	0.0005768	14	150	17	286
327	0.0005396	6	131	15	256
328	0.0006562	9	142	16	275
329	0.0006338	0	132	19	264
330	0.0005802	46	161	19	276
331	0.0005932	4	133	14	262
332	0.000637	5	143	17	281
333	0.0006053	0	137	17	274
334	0.0005442	25	153	16	281
335	0.0006585	14	145	19	276
336	0.0005835	6	136	15	266
337	0.0006414	39	164	18	289
338	0.0006175	16	148	19	280
339	0.0005815	8	135	15	262
340	0.0006268	6	138	17	270
341	0.0006914	12	148	17	284
342	0.0005648	6	139	14	272
343	0.0007257	36	159	15	282
344	0.000609	11	143	19	275
345	0.0007299	6	139	15	272
346	0.0005463	27	143	19	259
347	0.0005885	14	143	18	272
348	0.0006066	1	134	15	267
349	0.0006289	22	157	17	292
350	0.0006705	39	164	19	289
351	0.0005797	6	140	17	274
352	0.0006684	26	150	17	274
353	0.000574	8	141	15	274
354	0.0006732	4	140	15	276
355	0.0007978	11	134	15	257
356	0.0005242	29	146	17	263
357	0.0005762	41	158	16	275
358	0.0006526	15	143	16	271
359	0.0006008	19	144	15	269
360	0.0005565	57	169	19	281
361	0.0005952	29	153	17	277
362	0.0006387	1	134	13	267
363	0.0005732	13	146	16	279
364	0.0006527	16	143	15	270
365	0.0004957	7	133	14	259
366	0.0007064	17	148	19	279
367	0.0005187	35	149	17	263
368	0.000553	4	138	16	272
369	0.0006291	5	137	18	269
370	0.0006548	19	154	17	289
371	0.0006473	6	142	19	278
372	0.000572	15	141	15	267
373	0.0005752	0	141	16	282
374	0.0005932	73	188	18	303
375	0.0005996	6	137	15	268
376	0.0006635	17	152	16	287
377	0.0006412	10	141	16	272
378	0.0006684	11	132	16	253
379	0.0006072	17	147	19	277
380	0.0008119	7	144	18	281
381	0.0005912	5	141	15	277
382	0.0005339	48	157	17	266
383	0.0007113	12	145	19	278
384	0.0005834	24	145	15	266
385	0.0005849	40	162	18	284
386	0.0005916	9	138	16	267
387	0.0005753	13	133	14	253
388	0.0005736	22	153	17	284
389	0.000563	5	137	15	269
390	0.000622	1	136	18	271
391	0.000568	48	161	18	274
392	0.000619	20	147	16	274
393	0.0005489	20	138	18	256
394	0.0005337	26	147	19	268
395	0.0005059	0	130	13	260
396	0.0006409	3	137	17	271
397	0.0005434	31	152	17	273
398	0.0006983	22	149	18	276
399	0.0006104	9	141	17	273
400	0.0005807	2	131	14	260
401	0.0005875	3	141	15	279
402	0.0005502	31	152	18	273
403	0.0006612	6	141	14	276
404	0.0005236	54	167	19	280
405	0.0005631	3	133	14	263
406	0.0005837	4	142	15	280
407	0.0005547	72	171	19	270
408	0.000659	21	150	19	279
409	0.0005308	30	149	17	268
410	0.0006105	11	135	14	259
411	0.0005799	12	135	19	258
412	0.0005487	0	134	14	268
413	0.000571	40	159	19	278
414	0.0007163	15	147	16	279
415	0.000567	0	139	15	278
416	0.0006445	7	138	16	269
417	0.0006935	6	140	14	274
418	0.0006418	19	146	18	273
419	0.0006053	2	146	19	290
420	0.0005628	46	165	16	284
421	0.000523	79	183	19	287
422	0.0006138	4	139	16	274
423	0.0005574	35	150	14	265
424	0.0005289	19	140	16	261
425	0.0006114	9	145	19	281
426	0.0006351	11	144	16	277
427	0.0005476	11	139	13	267
428	0.0006084	0	138	18	276
429	0.0006316	62	174	19	286
430	0.0005662	11	139	17	267
431	0.0005961	26	152	18	278
432	0.0006646	24	150	18	276
433	0.0006342	1	129	17	257
434	0.0006027	7	137	15	267
435	0.0006365	1	133	19	265
436	0.0006276	3	132	13	261
437	0.0005658	23	148	18	273
438	0.0005619	41	160	18	279
439	0.0006348	27	141	18	255
440	0.0005846	1	132	18	263
441	0.0005692	9	138	15	267
442	0.0005965	17	136	17	255
443	0.0006397	11	137	14	263
444	0.0005803	33	152	17	271
445	0.0005703	8	134	14	260
446	0.0005876	4	138	16	272
447	0.0005701	9	137	13	265
448	0.000542	36	154	15	272
449	0.0005891	8	139	19	270
450	0.0006346	14	145	18	276
451	0.0006522	0	133	16	266
452	0.0005603	43	167	19	291
453	0.0005959	5	136	16	267
454	0.0007528	0	140	16	280
455	0.0005957	41	159	17	277
456	0.0005916	14	147	18	280
457	0.0006736	6	137	17	268
458	0.0005965	46	158	19	270
459	0.0005889	1	139	16	277
460	0.0006053	31	159	16	287
461	0.0006186	26	151	18	276
462	0.0005637	15	146	17	277
463	0.0005999	26	144	17	262
464	0.0006523	16	142	18	268
465	0.0005954	36	154	17	272
466	0.0005499	44	166	18	288
467	0.0006239	4	145	17	286
468	0.0006085	30	153	17	276
469	0.0005509	22	142	19	262
470	0.0005883	3	138	17	273
471	0.0006365	4	141	16	278
472	0.0006311	10	136	14	262
473	0.0006007	0	142	19	284
474	0.0005918	5	135	14	265
475	0.0005485	3	127	13	251
476	0.0005777	35	159	17	283
477	0.0006875	22	150	19	278
478	0.0005694	6	138	16	270
479	0.0005599	21	147	16	273
480	0.0005842	4	134	19	264
481	0.0006863	53	163	18	273
482	0.000533	33	149	18	265
483	0.0005972	38	156	17	274
484	0.0006299	10	144	19	278
485	0.0006183	10	139	16	268
486	0.0006551	15	140	18	265
487	0.0005969	6	139	14	272
488	0.0006148	4	139	16	274
489	0.0005157	29	144	14	259
490	0.0005598	4	135	16	266
491	0.0005642	41	158	17	275
492	0.0005457	24	144	19	264
493	0.0005557	40	166	19	292
494	0.0005796	17	143	18	269
495	0.0005623	26	154	16	282
496	0.0005355	35	161	18	287
497	0.000625	8	144	17	280
498	0.0006152	1	147	18	293
499	0.0005996	11	142	14	273
500	0.0005901	6	139	15	272
501	0.0007967	3	138	16	273
502	0.0005099	39	149	17	259
503	0.0005705	36	154	17	272
504	0.0006427	22	164	18	306
505	0.0005539	5	133	18	261
506	0.0006131	18	146	17	274
507	0.0007706	14	142	15	270
508	0.0006318	30	158	19	286
509	0.0005415	2	133	16	264
510	0.0006433	28	154	16	280
511	0.0005606	37	155	16	273
512	0.0005293	42	153	18	264
513	0.0005798	1	126	18	251
514	0.0006917	10	136	13	262
515	0.0005464	42	156	19	270
516	0.0007886	8	143	15	278
517	0.0006566	62	171	16	280
518	0.0006058	19	141	16	263
519	0.00064	2	134	13	266
520	0.0006678	9	146	19	283
521	0.0005814	10	133	14	256
522	0.000593	37	158	18	279
523	0.0008571	34	158	18	282
524	0.0005694	8	135	16	262
525	0.0005509	46	163	19	280
526	0.000548	46	160	18	274
527	0.0005903	45	167	19	289
528	0.0005698	20	140	18	260
529	0.0006517	36	151	18	266
530	0.0006792	5	142	17	279
531	0.0005322	67	178	19	289
532	0.0006253	25	141	13	257
533	0.0005829	30	146	18	262
534	0.0005432	48	164	19	280
535	0.0006793	12	141	15	270
536	0.0006068	17	150	19	283
537	0.0005949	27	141	18	255
538	0.0008539	32	148	18	264
539	0.0038319	1	142	16	283
540	0.00057	55	168	17	281
541	0.0006205	29	143	15	257
542	0.0006108	15	149	17	283
543	0.0005332	45	162	19	279
544	0.0006122	3	143	18	283
545	0.0005901	22	146	15	270
546	0.0005479	1	129	15	257
547	0.0006004	22	149	17	276
548	0.0005274	15	141	16	267
549	0.0005835	37	156	16	275
550	0.0005957	1	130	16	259
551	0.0005409	45	164	18	283
552	0.000533	44	156	17	268
553	0.0005467	17	141	19	265
554	0.0006112	22	150	19	278
555	0.0005439	40	151	15	262
556	0.0005922	0	127	13	254
557	0.0005397	22	140	17	258
558	0.0007512	2	146	16	290
559	0.0005361	12	140	17	268
560	0.0006367	4	138	16	272
561	0.0007052	11	145	19	279
562	0.000624	5	146	17	287
563	0.0006185	14	141	18	268
564	0.0006699	19	157	18	295
565	0.0005534	43	160	16	277
566	0.0005731	0	136	19	272
567	0.0006005	27	154	18	281
568	0.0005972	3	132	15	261
569	0.0006197	37	154	15	271
570	0.0005973	13	137	15	261
571	0.0005587	77	185	19	293
572	0.0005669	4	137	17	270
573	0.0005357	45	159	18	273
574	0.0005426	60	175	19	290
575	0.0006196	9	142	19	275
576	0.0006108	9	146	15	283
577	0.000567	33	151	15	269
578	0.0006224	12	144	19	276
579	0.0006447	9	141	15	273
580	0.0005708	6	137	15	268
581	0.0005756	50	164	18	278
582	0.0005863	4	136	18	268
583	0.0005276	3	134	15	265
584	0.0005265	40	151	19	262
585	0.0010996	9	135	16	261
586	0.0006147	49	167	19	285
587	0.0008135	8	137	14	266
588	0.0006438	0	129	14	258
589	0.0005384	2	131	16	260
590	0.0005763	20	146	14	272
591	0.0007287	8	149	16	290
592	0.0005407	30	150	15	270
593	0.0005392	60	170	18	280
594	0.0005884	15	142	19	269
595	0.0005668	4	132	14	260
596	0.0006356	5	147	16	289
597	0.0006555	4	140	16	276
598	0.0005543	17	141	18	265
599	0.0006265	2	140	19	278
600	0.0005407	46	167	18	288
601	0.0005397	0	129	16	258
602	0.0005967	10	138	16	266
603	0.0006592	4	142	18	280
604	0.0004911	35	142	16	249
605	0.0005606	5	134	19	263
606	0.0005573	0	132	18	264
607	0.0006476	15	136	16	257
608	0.0005793	1	130	14	259
609	0.0006375	33	159	19	285
610	0.0005749	31	159	18	287
611	0.0005371	10	142	18	274
612	0.0006017	12	149	19	286
613	0.0006076	60	168	17	276
614	0.0006457	6	144	17	282
615	0.0005886	11	146	17	281
616	0.0005846	24	140	18	256
617	0.0006661	36	158	16	280
618	0.0006172	16	143	18	270
619	0.0005542	15	141	16	267
620	0.0005618	75	189	19	303
621	0.0005927	12	140	18	268
622	0.0006011	4	145	18	286
623	0.0005578	46	165	17	284
624	0.0005655	46	159	18	272
625	0.0005841	19	151	18	283
626	0.0006201	5	136	17	267
627	0.0005979	32	152	19	272
628	0.0005563	45	160	17	275
629	0.0005972	22	148	16	274
630	0.0006838	27	153	16	279
631	0.0006604	69	181	19	293
632	0.000609	2	143	18	284
633	0.0006124	5	134	17	263
634	0.0005328	71	184	18	297
635	0.0005646	1	138	17	275
636	0.0006198	11	143	19	275
637	0.0005695	16	131	17	246
638	0.000541	28	144	17	260
639	0.0006437	23	152	16	281
640	0.0006347	15	152	17	289
641	0.000585	33	159	18	285
642	0.0005961	4	141	17	278
643	0.0006304	20	146	19	272
644	0.0006548	28	143	17	258
645	0.0006052	32	149	17	266
646	0.0007546	9	137	16	265
647	0.0005654	4	141	16	278
648	0.0005408	35	149	16	263
649	0.0008232	11	149	15	287
650	0.0006236	0	139	17	278
651	0.0006312	5	134	15	263
652	0.0005478	14	134	14	254
653	0.0005659	63	171	17	279
654	0.0005735	9	146	17	283
655	0.0006031	14	145	16	276
656	0.0005454	1	128	14	255
657	0.0006744	18	148	18	278
658	0.0005589	35	155	15	275
659	0.0008054	16	147	15	278
660	0.0007616	17	146	18	275
661	0.0006522	13	143	14	273
662	0.0006409	38	162	18	286
663	0.0008861	46	163	19	280
664	0.0006115	6	143	17	280
665	0.000524	30	145	19	260
666	0.0005592	3	136	18	269
667	0.0006032	29	153	16	277
668	0.0007065	25	156	16	287
669	0.0006211	9	143	15	277
670	0.0005955	2	136	15	270
671	0.0005093	32	148	15	264
672	0.0005842	13	143	18	273
673	0.0006125	23	145	17	267
674	0.0005689	9	139	15	269
675	0.000605	56	175	18	294
676	0.0005571	22	145	17	268
677	0.0006079	6	140	15	274
678	0.0005838	21	145	19	269
679	0.0007789	1	139	16	277
680	0.0006544	15	147	18	279
681	0.0005562	39	149	14	259
682	0.0005677	3	124	13	245
683	0.0005577	3	135	14	267
684	0.0006641	2	130	13	258
685	0.0006419	6	137	17	268
686	0.0010628	5	134	16	263
687	0.0005802	43	163	18	283
688	0.0006011	39	155	18	271
689	0.000583	30	156	19	282
690	0.0005584	16	141	15	266
691	0.0005588	28	147	15	266
692	0.0006133	19	147	14	275
693	0.0006206	27	156	16	285
694	0.0005163	41	152	18	263
695	0.0006383	15	144	17	273
696	0.0005902	0	132	17	264
697	0.0006443	6	141	15	276
698	0.0005682	26	144	19	262
699	0.0006004	9	132	15	255
700	0.0005488	3	131	15	259
701	0.0005857	12	138	16	264
702	0.0005696	8	133	18	258
703	0.0005818	24	155	19	286
704	0.0006052	4	144	17	284
705	0.0005343	49	169	17	289
706	0.0005792	24	153	17	282
707	0.0007674	8	149	16	290
708	0.0006008	21	147	17	273
709	0.0006076	21	155	19	289
710	0.0006038	8	140	15	272
711	0.0006176	10	143	18	276
712	0.0007606	14	147	19	280
713	0.0006164	24	149	18	274
714	0.0005442	17	147	19	277
715	0.000524	11	137	18	263
716	0.0006405	12	137	16	262
717	0.0005435	3	131	18	259
718	0.0008012	1	142	15	283
719	0.000608	4	136	19	268
720	0.0006357	33	162	19	291
721	0.0007714	25	149	19	273
722	0.0006237	12	139	17	266
723	0.0006122	30	151	18	272
724	0.000626	1	136	17	271
725	0.0006166	3	135	17	267
726	0.0005762	5	141	17	277
727	0.0005784	7	139	16	271
728	0.0005801	12	139	18	266
729	0.0006593	7	138	17	269
730	0.0005714	23	146	17	269
731	0.0006564	3	142	16	281
732	0.0005789	52	165	16	278
733	0.0006386	5	136	15	267
734	0.0005652	3	127	15	251
735	0.0005993	8	135	18	262
736	0.0006649	17	142	17	267
737	0.0005379	22	145	14	268
738	0.0006853	15	148	17	281
739	0.0006167	31	151	18	271
740	0.0006441	1	134	16	267
741	0.0005766	5	140	19	275
742	0.0005108	42	158	17	274
743	0.0006167	8	141	17	274
744	0.0007553	14	150	16	286
745	0.0005874	47	162	17	277
746	0.000665	14	152	19	290
747	0.0006445	5	142	15	279
748	0.0006575	12	147	16	282
749	0.0005752	12	140	16	268
750	0.0006536	2	140	17	278
751	0.0006198	31	158	19	285
752	0.0006303	8	140	19	272
753	0.000611	9	141	16	273
754	0.000648	4	140	18	276
755	0.0005462	58	167	18	276
756	0.0007137	31	155	16	279
757	0.0005614	41	162	19	283
758	0.0006146	59	176	19	293
759	0.0006549	7	139	16	271
760	0.0005451	16	141	13	266
761	0.0006369	27	154	18	281
762	0.0005756	4	134	16	264
763	0.0006114	43	154	18	265
764	0.0006014	3	142	16	281
765	0.0006324	10	140	18	270
766	0.0006543	5	145	17	285
767	0.0007107	12	151	19	290
768	0.0005731	45	162	19	279
769	0.0005862	3	137	17	271
770	0.0006735	10	132	18	254
771	0.0005065	48	158	15	268
772	0.0005789	19	145	15	271
773	0.0006643	11	152	18	293
774	0.0006225	8	133	18	258
775	0.0005936	23	156	17	289
776	0.0005988	5	137	16	269
777	0.0005958	2	143	18	284
778	0.0006412	24	153	17	282
779	0.000623	47	161	18	275
780	0.0006026	26	151	17	276
781	0.0005534	15	137	16	259
782	0.0006286	6	141	14	276
783	0.0006736	14	148	17	282
784	0.0005878	9	141	15	273
785	0.0005598	29	156	18	283
786	0.0005207	57	170	19	283
787	0.0006016	17	145	14	273
788	0.0006222	6	138	15	270
789	0.0005234	10	134	13	258
790	0.0005612	4	134	14	264
791	0.0005338	6	134	15	262
792	0.000597	12	141	16	270
793	0.0006887	28	154	17	280
794	0.0006087	39	157	19	275
795	0.0005238	27	148	17	269
796	0.0006174	2	130	17	258
797	0.0005498	2	135	17	268
798	0.0005248	54	168	18	282
799	0.0006121	27	148	18	269
800	0.0005737	10	133	13	256
801	0.0005381	16	132	19	248
802	0.0005695	15	141	14	267
803	0.0007191	14	154	19	294
804	0.0005512	6	133	18	260
805	0.0006135	19	151	19	283
806	0.0006093	6	133	14	260
807	0.0005591	28	151	18	274
808	0.0005898	28	154	18	280
809	0.0005254	52	163	19	274
810	0.0007203	5	146	15	287
811	0.0005588	31	154	18	277
812	0.0006239	8	144	16	280
813	0.000591	1	136	15	271
814	0.0005305	42	163	19	284
815	0.0005798	8	136	15	264
816	0.0006216	17	139	16	261
817	0.0006154	7	135	13	263
818	0.0005232	58	169	19	280
819	0.0005131	48	163	16	278
820	0.000589	35	154	16	273
821	0.0005687	63	170	19	277
822	0.0007608	11	139	14	267
823	0.0005941	10	140	14	270
824	0.0006983	24	144	17	264
825	0.0006631	0	143	15	286
826	0.0006461	7	146	16	285
827	0.000598	15	143	16	271
828	0.0005374	4	127	14	250
829	0.0005874	2	137	14	272
830	0.0005671	11	140	15	269
831	0.0004881	32	142	15	252
832	0.0006232	19	144	16	269
833	0.0005669	3	140	16	277
834	0.0005983	6	134	15	262
835	0.0006228	15	147	17	279
836	0.0005514	43	158	19	273
837	0.0005875	20	151	16	282
838	0.000633	58	170	19	282
839	0.0006566	18	149	17	280
840	0.0006206	17	148	18	279
841	0.0006002	25	151	18	277
842	0.000608	2	138	16	274
843	0.0006371	13	143	16	273
844	0.0005895	9	138	18	267
845	0.0006232	2	139	16	276
846	0.0006177	16	147	18	278
847	0.00053	2	129	16	256
848	0.0005878	12	138	15	264
849	0.0005962	22	151	19	280
850	0.0005582	13	142	17	271
851	0.0006393	6	141	19	276
852	0.0005145	49	162	18	275
853	0.0006001	20	149	15	278
854	0.0005884	40	155	19	270
855	0.0006056	2	128	13	254
856	0.0006583	8	140	17	272
857	0.0006278	13	139	15	265
858	0.0006161	27	153	18	279
859	0.0005993	58	182	19	306
860	0.0006097	7	134	18	261
861	0.0005639	28	145	17	262
862	0.0006199	56	176	19	296
863	0.0005917	2	140	17	278
864	0.0006009	37	155	17	273
865	0.0005735	68	176	19	284
866	0.0007059	10	146	16	282
867	0.0006179	43	164	19	285
868	0.0007151	6	138	15	270
869	0.0005748	28	150	17	272
870	0.0006524	12	142	17	272
871	0.0006423	7	142	17	277
872	0.0005789	0	132	18	264
873	0.0006286	29	150	18	271
874	0.0005989	13	139	15	265
875	0.000527	40	151	16	262
876	0.0007317	14	150	16	286
877	0.0006209	15	147	18	279
878	0.000547	14	136	14	258
879	0.0006967	15	145	19	275
880	0.0005504	4	131	15	258
881	0.0006592	14	151	14	288
882	0.0006302	22	150	16	278
883	0.0005232	35	151	18	267
884	0.0005939	37	158	18	279
885	0.0005437	1	133	15	265
886	0.0006466	12	150	19	288
887	0.0006736	8	140	15	272
888	0.0006231	20	147	16	274
889	0.0005967	4	144	17	284
890	0.0008153	6	136	14	266
891	0.0010809	43	158	18	273
892	0.0006117	12	138	16	264
893	0.0006776	43	158	17	273
894	0.0005507	8	139	17	270
895	0.0005629	68	181	19	294
896	0.0005274	48	158	19	268
897	0.0006127	14	143	15	272
898	0.000575	29	149	15	269
899	0.0005075	44	156	17	268
900	0.000633	49	163	18	277
901	0.0005575	30	152	19	274
902	0.000587	5	141	19	277
903	0.0006888	33	153	19	273
904	0.0006327	21	145	18	269
905	0.0006153	3	139	18	275
906	0.0005795	4	138	16	272
907	0.0006417	39	163	16	287
908	0.0005931	12	145	17	278
909	0.0005252	20	151	18	282
910	0.0006818	16	151	16	286
911	0.0006611	57	174	17	291
912	0.0005978	7	139	14	271
913	0.000571	43	163	16	283
914	0.0006186	28	140	14	252
915	0.0005393	5	137	16	269
916	0.0006323	1	136	19	271
917	0.0005462	36	149	17	262
918	0.0006644	17	142	16	267
919	0.0006201	1	139	14	277
920	0.0005668	19	149	15	279
921	0.0005829	3	131	17	259
922	0.0007421	0	137	15	274
923	0.0006679	23	156	18	289
924	0.0006775	3	140	17	277
925	0.0005383	25	149	17	273
926	0.0007162	7	141	16	275
927	0.0005961	9	141	14	273
928	0.0006041	17	148	18	279
929	0.0005125	55	164	16	273
930	0.000549	26	150	19	274
931	0.0008761	47	165	18	283
932	0.0007392	62	176	18	290
933	0.0005869	4	146	19	288
934	0.0006631	7	143	16	279
935	0.0006188	10	143	15	276
936	0.0006087	19	147	15	275
937	0.000601	6	145	16	284
938	0.0006837	7	143	19	279
939	0.000588	22	150	17	278
940	0.0006356	27	147	16	267
941	0.0006319	11	145	15	279
942	0.0005326	28	147	16	266
943	0.0005304	13	135	15	257
944	0.0006156	18	145	15	272
945	0.0006291	17	142	17	267
946	0.0006205	28	158	16	288
947	0.0006734	39	164	19	289
948	0.0005276	40	158	17	276
949	0.0006086	10	146	14	282
950	0.000512	14	135	16	256
951	0.0005414	37	152	17	267
952	0.0005612	45	162	18	279
953	0.0005144	14	139	18	264
954	0.0005764	12	146	14	280
955	0.0006618	9	141	17	273
956	0.000613	18	139	18	260
957	0.0006081	12	135	15	258
958	0.0005729	13	145	18	277
959	0.0005865	18	144	16	270
960	0.0005464	4	134	17	264
961	0.0005354	18	141	17	264
962	0.0005767	19	143	15	267
963	0.0006035	12	140	15	268
964	0.0006195	33	157	19	281
965	0.0005935	33	150	16	267
966	0.0006115	15	144	14	273
967	0.0006455	12	143	18	274
968	0.0005366	14	142	19	270
969	0.0006415	34	160	17	286
970	0.0005597	2	129	15	256
971	0.0006136	8	140	18	272
972	0.0006457	1	139	19	277
973	0.0005664	0	141	19	282
974	0.000666	39	166	19	293
975	0.000665	8	140	17	272
976	0.0005297	9	135	17	261
977	0.0005159	34	152	18	270
978	0.0005611	45	157	17	269
979	0.0005761	41	151	17	261
980	0.0005245	6	130	13	254
981	0.0006951	14	150	16	286
982	0.0006155	14	145	18	276
983	0.000593	62	181	17	300
984	0.0005604	66	179	19	292
985	0.0005913	33	158	17	283
986	0.0005823	7	142	16	277
987	0.0006979	2	146	18	290
988	0.0005436	7	135	18	263
989	0.0006767	10	152	18	294
990	0.0005744	52	166	18	280
991	0.0006375	34	155	17	276
992	0.0005921	11	140	17	269
993	0.0005181	39	156	18	273
994	0.0005539	55	165	18	275
995	0.0006099	5	141	17	277
996	0.000643	2	144	17	286
997	0.000597	2	138	18	274
998	0.0006083	9	138	16	267
999	0.000527	0	130	16	260
mean	0.000609516	20.134	146.706	16.746	273.278

## Sheet: PowerBalance_SEq
	time	SEq	Bal	Reg	Egal
0	0.0004657	9	140	18	271
1	0.0004906	6	137	18	268
2	0.0003686	1	139	15	277
3	0.0003908	0	136	15	272
4	0.0005154	13	144	18	275
5	0.0004863	9	143	17	277
6	0.0003631	8	144	18	280
7	0.0004745	26	159	18	292
8	0.0003593	1	133	16	265
9	0.0004725	19	140	18	261
10	0.0004824	15	147	18	279
11	0.0003597	2	133	15	264
12	0.0005047	2	136	13	270
13	0.0005136	21	153	16	285
14	0.0004665	9	145	18	281
15	0.0004717	18	141	19	264
16	0.0006912	11	142	16	273
17	0.0003535	0	131	14	262
18	0.0005732	6	140	15	274
19	0.0004694	7	139	14	271
20	0.0004707	10	142	18	274
21	0.0003446	2	137	15	272
22	0.0004299	1	135	17	269
23	0.0004745	14	129	14	244
24	0.0004806	3	136	15	269
25	0.0003384	4	145	19	286
26	0.0003843	3	129	15	255
27	0.0003796	4	143	17	282
28	0.000521	1	140	15	279
29	0.0003642	5	128	14	251
30	0.0003658	6	131	13	256
31	0.0005011	10	147	17	284
32	0.0003704	12	135	18	258
33	0.0004721	4	133	17	262
34	0.0005512	10	143	15	276
35	0.0004643	5	134	17	263
36	0.0003775	2	144	15	286
37	0.000511	0	133	18	266
38	0.0005685	23	146	14	269
39	0.0004972	32	153	15	274
40	0.0004594	9	138	18	267
41	0.0005139	11	132	16	253
42	0.0003514	6	140	17	274
43	0.0004823	11	139	15	267
44	0.0005099	10	142	18	274
45	0.0004577	1	132	19	263
46	0.0004703	21	144	18	267
47	0.0004912	11	141	15	271
48	0.0005336	32	154	18	276
49	0.0004926	4	138	15	272
50	0.0004893	27	152	18	277
51	0.0004907	19	150	18	281
52	0.0005048	5	135	18	265
53	0.000466	12	143	18	274
54	0.00047	16	144	16	272
55	0.0004558	5	137	17	269
56	0.0004949	11	146	17	281
57	0.0003724	3	136	17	269
58	0.0004074	11	133	13	255
59	0.0004646	4	132	17	260
60	0.0004822	6	144	17	282
61	0.0004791	14	136	15	258
62	0.0004776	11	140	18	269
63	0.0005059	9	143	18	277
64	0.000475	28	155	19	282
65	0.0003679	7	138	13	269
66	0.0004732	3	129	17	255
67	0.0003794	5	136	15	267
68	0.0004843	3	141	19	279
69	0.000487	13	149	17	285
70	0.0005729	6	138	14	270
71	0.0003582	3	141	17	279
72	0.0004813	12	150	17	288
73	0.0005401	14	142	16	270
74	0.0005329	5	140	18	275
75	0.000492	9	139	17	269
76	0.0004861	20	147	18	274
77	0.000354	2	137	15	272
78	0.0004852	5	138	14	271
79	0.0004795	22	151	18	280
80	0.0004719	6	134	14	262
81	0.0004738	14	148	17	282
82	0.0004736	18	146	19	274
83	0.0004616	12	139	16	266
84	0.000348	5	138	13	271
85	0.0004618	1	145	19	289
86	0.0004752	19	133	15	247
87	0.000355	9	144	16	279
88	0.0004686	13	144	19	275
89	0.0004857	2	136	15	270
90	0.0004767	23	150	17	277
91	0.0004791	6	135	16	264
92	0.0004677	23	155	19	287
93	0.0005136	8	138	18	268
94	0.0004694	8	139	14	270
95	0.0004929	17	150	15	283
96	0.0004784	1	139	18	277
97	0.0005218	7	142	15	277
98	0.0004722	6	141	16	276
99	0.0004785	4	134	15	264
100	0.000397	5	138	15	271
101	0.0004658	17	141	15	265
102	0.0004883	32	156	19	280
103	0.0005006	31	154	18	277
104	0.0005021	29	155	16	281
105	0.0003644	4	134	17	264
106	0.0004778	10	148	18	286
107	0.0004678	6	136	17	266
108	0.0004739	2	132	17	262
109	0.0004883	15	151	16	287
110	0.0004714	31	154	18	277
111	0.0004755	18	149	17	280
112	0.0005889	7	142	14	277
113	0.0004543	0	134	16	268
114	0.0004799	8	146	17	284
115	0.0004679	6	135	15	264
116	0.0003747	2	130	15	258
117	0.0003827	4	139	16	274
118	0.0004084	5	137	13	269
119	0.000497	9	135	14	261
120	0.0004823	13	138	16	263
121	0.0005078	6	137	17	268
122	0.00048	8	137	19	266
123	0.0004648	2	127	17	252
124	0.0005126	2	142	19	282
125	0.0003493	2	127	13	252
126	0.0004745	6	138	14	270
127	0.0004823	14	142	15	270
128	0.0003797	0	133	16	266
129	0.0004741	13	149	16	285
130	0.0004671	12	138	15	264
131	0.0004914	3	130	16	257
132	0.0003479	2	143	15	284
133	0.0004618	14	135	15	256
134	0.0003631	2	143	18	284
135	0.0005657	4	138	16	272
136	0.0003617	5	136	14	267
137	0.0004612	7	130	15	253
138	0.0004915	27	156	18	285
139	0.0004684	0	131	15	262
140	0.0005211	15	138	14	261
141	0.0004904	24	146	17	268
142	0.0005215	5	144	16	283
143	0.0004858	2	133	14	264
144	0.000368	6	135	18	264
145	0.000372	0	139	16	278
146	0.0003661	3	131	18	259
147	0.0005281	6	144	17	282
148	0.0004905	18	155	18	292
149	0.0003796	11	140	16	269
150	0.0004685	5	141	15	277
151	0.0003518	3	133	14	263
152	0.0004871	9	140	15	271
153	0.0005577	8	141	17	274
154	0.0004804	17	152	19	287
155	0.0004718	3	144	17	285
156	0.0004112	1	137	18	273
157	0.0003469	0	132	17	264
158	0.0003535	1	127	12	253
159	0.0005353	15	144	19	273
160	0.0004555	16	138	15	260
161	0.0004571	0	138	18	276
162	0.0004882	19	148	17	277
163	0.0005677	19	154	17	289
164	0.0005247	13	144	16	275
165	0.0005005	3	136	19	269
166	0.0005371	6	146	17	286
167	0.0004963	15	144	18	273
168	0.0004608	7	149	19	291
169	0.0004831	7	138	19	269
170	0.0004877	2	142	18	282
171	0.0004717	4	139	15	274
172	0.0004679	5	136	13	267
173	0.0004802	23	146	15	269
174	0.0004693	6	141	16	276
175	0.0004934	6	142	13	278
176	0.0004733	23	142	17	261
177	0.0003655	1	140	15	279
178	0.0004671	9	146	17	283
179	0.0004766	11	143	15	275
180	0.0004866	6	130	14	254
181	0.0004864	7	142	16	277
182	0.0004823	9	134	16	259
183	0.0004761	7	145	16	283
184	0.000491	8	136	17	264
185	0.0004014	1	132	19	263
186	0.0004747	6	141	13	276
187	0.0004585	7	127	15	247
188	0.0005676	37	166	18	295
189	0.0004721	3	137	15	271
190	0.0004966	17	132	16	247
191	0.0005673	4	138	18	272
192	0.0004724	12	137	17	262
193	0.0004868	9	148	17	287
194	0.0004819	21	149	15	277
195	0.0004685	5	134	18	263
196	0.0003327	4	131	14	258
197	0.0004753	13	140	17	267
198	0.000487	19	148	16	277
199	0.0004868	10	147	18	284
200	0.0004842	6	134	15	262
201	0.000495	15	145	18	275
202	0.0004741	10	142	16	274
203	0.0004681	6	143	18	280
204	0.0004869	14	152	18	290
205	0.0004926	4	138	16	272
206	0.0004773	12	137	14	262
207	0.0005058	5	140	16	275
208	0.0004592	2	137	17	272
209	0.0004868	13	144	19	275
210	0.0004684	12	142	19	272
211	0.0003667	4	135	16	266
212	0.000549	17	146	16	275
213	0.0004797	14	148	19	282
214	0.0004712	8	148	16	288
215	0.0004815	3	139	13	275
216	0.0005267	20	143	15	266
217	0.0003578	3	132	16	261
218	0.0005475	4	132	14	260
219	0.0005025	21	156	19	291
220	0.0004646	3	138	17	273
221	0.0004951	1	138	17	275
222	0.0003582	1	132	16	263
223	0.0003729	2	134	14	266
224	0.000462	12	146	18	280
225	0.0005045	16	145	18	274
226	0.0005056	27	152	19	277
227	0.0003545	2	133	18	264
228	0.0004998	9	143	17	277
229	0.0004624	4	129	15	254
230	0.0004834	26	152	14	278
231	0.0003388	4	134	14	264
232	0.0004533	1	136	17	271
233	0.0004621	18	141	19	264
234	0.0004754	12	142	15	272
235	0.0004714	4	136	13	268
236	0.0004934	2	134	16	266
237	0.000483	2	143	17	284
238	0.0005595	22	151	16	280
239	0.0004669	9	135	17	261
240	0.0004855	13	149	16	285
241	0.0003742	0	133	16	266
242	0.0004759	13	147	16	281
243	0.0005049	9	148	19	287
244	0.0005083	5	138	16	271
245	0.0003646	4	132	15	260
246	0.00047	14	139	16	264
247	0.0005121	4	142	16	280
248	0.0004764	5	135	15	265
249	0.0004768	9	144	19	279
250	0.0003615	5	141	16	277
251	0.0003597	8	135	15	262
252	0.0005083	24	156	19	288
253	0.0004216	1	129	15	257
254	0.0004753	19	151	18	283
255	0.0004874	3	146	17	289
256	0.0005049	11	140	17	269
257	0.0004398	1	133	14	265
258	0.000478	6	140	17	274
259	0.0004875	9	143	19	277
260	0.0005286	9	143	15	277
261	0.0004873	19	147	17	275
262	0.0003659	1	133	18	265
263	0.0004666	2	134	17	266
264	0.0004805	15	148	18	281
265	0.0005431	3	139	17	275
266	0.0004962	17	144	16	271
267	0.0004775	13	151	17	289
268	0.0004797	14	143	15	272
269	0.0004665	12	135	17	258
270	0.0004674	20	147	16	274
271	0.0005102	9	144	16	279
272	0.0005147	5	139	16	273
273	0.0005186	7	131	17	255
274	0.000697	17	153	15	289
275	0.0005236	12	134	17	256
276	0.0004831	19	147	16	275
277	0.0005037	7	137	18	267
278	0.0003727	1	134	17	267
279	0.0005103	0	140	19	280
280	0.0004662	19	155	19	291
281	0.0004664	12	147	17	282
282	0.0004908	6	143	18	280
283	0.0004597	12	130	16	248
284	0.0004703	5	138	14	271
285	0.000374	2	138	16	274
286	0.0003788	10	143	14	276
287	0.0004706	11	140	16	269
288	0.0004849	9	142	19	275
289	0.0004411	4	136	15	268
290	0.0003831	13	150	17	287
291	0.0005117	21	152	17	283
292	0.0004997	3	136	18	269
293	0.0003474	1	128	14	255
294	0.0004753	3	142	19	281
295	0.0003701	3	143	17	283
296	0.0005197	3	139	17	275
297	0.0004792	12	145	17	278
298	0.0005482	15	142	15	269
299	0.0004653	12	139	19	266
300	0.0003818	4	136	17	268
301	0.0003758	11	133	17	255
302	0.000469	9	138	15	267
303	0.0005429	15	137	17	259
304	0.0004101	8	142	16	276
305	0.000375	3	139	17	275
306	0.000484	15	147	19	279
307	0.0005149	3	139	18	275
308	0.0003572	4	145	18	286
309	0.0004657	23	147	18	271
310	0.0004946	4	140	18	276
311	0.0004808	37	160	18	283
312	0.0004759	4	142	16	280
313	0.0005045	33	157	15	281
314	0.0004637	3	138	19	273
315	0.0004679	10	141	17	272
316	0.0004632	9	137	15	265
317	0.0004759	26	148	15	270
318	0.0004679	6	137	19	268
319	0.0004764	13	141	19	269
320	0.0004612	12	137	18	262
321	0.0004852	29	152	17	275
322	0.000366	5	134	14	263
323	0.0004761	17	146	19	275
324	0.0003706	12	135	19	258
325	0.0004728	3	128	16	253
326	0.0004767	3	143	16	283
327	0.0003463	1	128	15	255
328	0.0004774	9	142	16	275
329	0.0004887	9	136	19	263
330	0.0003483	3	130	13	257
331	0.000353	8	134	14	260
332	0.0004895	5	143	17	281
333	0.0003534	0	137	17	274
334	0.0004805	18	155	19	292
335	0.0004166	1	136	15	271
336	0.0004783	3	137	16	271
337	0.0003856	1	137	16	273
338	0.0004786	12	145	19	278
339	0.0004602	8	135	15	262
340	0.0004776	6	138	17	270
341	0.0004716	29	156	17	283
342	0.0003561	6	139	14	272
343	0.0004846	36	159	15	282
344	0.0003632	1	137	19	273
345	0.0004817	10	141	17	272
346	0.0003774	6	131	18	256
347	0.0004654	7	138	17	269
348	0.000378	1	134	15	267
349	0.0004916	22	157	17	292
350	0.000498	39	164	19	289
351	0.0004742	6	140	17	274
352	0.0004652	12	142	17	272
353	0.0004792	8	141	15	274
354	0.000468	4	140	15	276
355	0.0004688	11	134	15	257
356	0.0004669	8	135	14	262
357	0.000462	3	137	17	271
358	0.0003701	1	136	16	271
359	0.0004839	0	133	15	266
360	0.0004111	0	138	15	276
361	0.0004826	4	139	17	274
362	0.0005887	1	134	13	267
363	0.0004868	1	139	16	277
364	0.000536	16	143	15	270
365	0.0004634	4	136	18	268
366	0.0005426	3	141	16	279
367	0.0004641	11	136	14	261
368	0.0004833	4	138	16	272
369	0.000536	5	137	18	269
370	0.0004791	2	142	17	282
371	0.0004835	8	139	19	270
372	0.0003625	3	136	15	269
373	0.0004894	11	147	16	283
374	0.0004883	21	153	16	285
375	0.0005537	6	137	15	268
376	0.0004772	5	143	17	281
377	0.0004694	10	141	16	272
378	0.0003502	5	129	15	253
379	0.0004765	10	145	19	280
380	0.0004758	7	144	18	281
381	0.0004673	2	140	15	278
382	0.0005003	17	142	15	267
383	0.0004799	12	145	16	278
384	0.000479	24	145	15	266
385	0.0004883	8	138	19	268
386	0.0004866	12	136	13	260
387	0.0004732	22	135	14	248
388	0.0005363	11	149	17	287
389	0.0003672	5	137	15	269
390	0.0004623	1	136	18	271
391	0.0003749	10	139	16	268
392	0.0004787	9	138	15	267
393	0.0004702	20	138	18	256
394	0.00042	4	136	17	268
395	0.00036	0	130	13	260
396	0.0004597	12	140	17	268
397	0.00048	3	134	15	265
398	0.0005028	22	149	18	276
399	0.0003701	9	141	17	273
400	0.0003575	2	131	14	260
401	0.0005576	13	147	17	281
402	0.0005115	12	141	16	270
403	0.0004706	6	141	14	276
404	0.000374	0	134	15	268
405	0.0004693	3	133	14	263
406	0.000472	4	142	15	280
407	0.0003808	2	134	15	266
408	0.0005074	5	142	16	279
409	0.0004743	12	139	16	266
410	0.0004739	11	135	14	259
411	0.0004997	2	131	18	260
412	0.0003512	0	134	14	268
413	0.0005043	12	149	18	286
414	0.0005091	15	147	16	279
415	0.0003595	0	139	15	278
416	0.0004788	7	138	16	269
417	0.0004961	17	144	14	271
418	0.000486	19	146	18	273
419	0.0005056	9	149	18	289
420	0.0004964	13	146	16	279
421	0.0003626	1	131	14	261
422	0.0004955	18	141	19	264
423	0.0004496	1	135	18	269
424	0.0004691	19	148	19	277
425	0.0005247	28	155	19	282
426	0.0003509	5	142	16	279
427	0.0004763	2	134	13	266
428	0.000463	0	138	18	276
429	0.0004823	16	141	13	266
430	0.0003552	5	138	15	271
431	0.0005176	12	147	17	282
432	0.0004812	24	150	18	276
433	0.0004798	21	141	18	261
434	0.0004916	6	135	16	264
435	0.0004679	1	133	19	265
436	0.0004	3	132	13	261
437	0.0004877	13	140	16	267
438	0.0005195	2	134	14	266
439	0.0004615	3	131	18	259
440	0.0003541	1	132	18	263
441	0.0004651	9	138	15	267
442	0.0003748	17	136	17	255
443	0.0005054	11	137	14	263
444	0.0003429	4	131	15	258
445	0.0003647	8	134	14	260
446	0.0004628	4	138	16	272
447	0.0003646	9	137	13	265
448	0.0005017	15	147	16	279
449	0.0004776	14	143	17	272
450	0.0005056	1	138	18	275
451	0.0003508	0	133	16	266
452	0.0004632	9	143	17	277
453	0.0004651	7	137	16	267
454	0.0003628	0	140	16	280
455	0.0003914	1	134	14	267
456	0.0004893	14	148	17	282
457	0.0004748	6	137	17	268
458	0.0004951	1	132	15	263
459	0.0003797	1	139	16	277
460	0.0004784	0	134	15	268
461	0.0004963	12	142	18	272
462	0.0004711	15	146	17	277
463	0.0003753	3	135	18	267
464	0.0003612	4	138	16	272
465	0.0004914	5	137	16	269
466	0.0004848	8	146	16	284
467	0.0004943	18	150	17	282
468	0.0004734	16	145	18	274
469	0.0005004	8	134	19	260
470	0.000382	3	138	17	273
471	0.0004819	12	147	18	282
472	0.0005067	9	139	14	269
473	0.0005187	11	145	19	279
474	0.0004739	5	135	14	265
475	0.0003288	3	127	13	251
476	0.0005174	25	152	17	279
477	0.0004788	7	141	14	275
478	0.0004618	15	144	16	273
479	0.0005261	0	137	16	274
480	0.0004688	4	134	19	264
481	0.0003359	3	128	17	253
482	0.000468	8	139	19	270
483	0.0004531	3	133	14	263
484	0.0004952	12	139	19	266
485	0.0004713	8	137	15	266
486	0.0004745	12	136	16	260
487	0.0004733	11	142	14	273
488	0.0004856	13	142	16	271
489	0.0004758	13	137	17	261
490	0.0004692	4	135	16	266
491	0.0004642	11	146	17	281
492	0.0004637	15	140	19	265
493	0.0004615	8	151	18	294
494	0.0003678	0	136	17	272
495	0.0003701	1	139	16	277
496	0.0003863	2	140	18	278
497	0.0004164	6	142	17	278
498	0.0004788	1	147	18	293
499	0.0004792	11	142	14	273
500	0.0004678	12	141	15	270
501	0.0004958	3	138	16	273
502	0.0003567	4	131	18	258
503	0.0004552	3	135	16	267
504	0.0003625	3	143	14	283
505	0.000472	5	133	18	261
506	0.0004696	2	138	17	274
507	0.0004645	7	141	15	275
508	0.0004894	30	158	19	286
509	0.0004223	2	133	16	264
510	0.0004991	4	143	16	282
511	0.0004945	6	141	16	276
512	0.0004622	29	145	16	261
513	0.0003525	1	126	18	251
514	0.0004669	2	135	15	268
515	0.0004729	21	143	19	265
516	0.0004855	8	142	15	276
517	0.0004864	4	135	14	266
518	0.0004682	11	141	18	271
519	0.0003995	2	134	13	266
520	0.0005007	1	144	18	287
521	0.0003743	10	133	14	256
522	0.0004744	2	140	15	278
523	0.0005123	15	145	17	275
524	0.0005368	8	135	16	262
525	0.0004674	2	135	15	268
526	0.0004723	2	140	17	278
527	0.0004735	3	139	16	275
528	0.0004672	20	140	18	260
529	0.0004641	22	145	18	268
530	0.0004789	5	142	17	279
531	0.0003637	6	139	17	272
532	0.0004685	10	135	13	260
533	0.0004671	4	134	17	264
534	0.0005023	1	136	16	271
535	0.0004761	3	135	15	267
536	0.0005398	1	140	19	279
537	0.0003549	0	127	14	254
538	0.000358	4	129	14	254
539	0.0005042	1	142	16	283
540	0.0005266	17	150	19	283
541	0.0004807	4	133	15	262
542	0.0004893	15	149	17	283
543	0.0004721	13	147	16	281
544	0.0004834	11	144	18	277
545	0.0004795	7	142	15	277
546	0.0003507	1	129	15	257
547	0.0004877	18	151	16	284
548	0.0004991	7	138	16	269
549	0.0004849	16	141	17	266
550	0.0005947	1	130	16	259
551	0.0004663	3	139	18	275
552	0.0004641	8	137	15	266
553	0.0004768	12	138	19	264
554	0.0004697	8	143	19	278
555	0.0005304	6	137	14	268
556	0.0003363	0	127	13	254
557	0.0004692	14	134	17	254
558	0.0004874	2	146	16	290
559	0.0003876	5	139	16	273
560	0.0005152	4	138	16	272
561	0.0004871	11	145	19	279
562	0.0004902	5	145	17	285
563	0.0004779	14	141	18	268
564	0.0005289	43	165	18	287
565	0.0005313	5	139	15	273
566	0.0004855	5	139	18	273
567	0.0004813	27	154	18	281
568	0.0004485	3	132	15	261
569	0.0003627	0	137	14	274
570	0.0004904	8	137	17	266
571	0.0005027	5	139	17	273
572	0.0004733	8	137	17	266
573	0.0004608	4	140	17	276
574	0.0004841	13	149	16	285
575	0.0005063	9	142	19	275
576	0.0003739	1	143	16	285
577	0.0004716	13	138	15	263
578	0.0004925	12	144	19	276
579	0.0004845	9	141	15	273
580	0.0004749	6	137	15	268
581	0.0004867	13	138	18	263
582	0.0004759	4	136	18	268
583	0.0003451	3	134	15	265
584	0.0004597	8	137	18	266
585	0.0004703	9	135	16	261
586	0.0004705	1	137	15	273
587	0.0003579	7	135	14	263
588	0.0004653	0	129	14	258
589	0.0003748	5	133	15	261
590	0.0004769	7	141	15	275
591	0.000477	16	153	16	290
592	0.0004958	4	137	17	270
593	0.0005287	39	156	18	273
594	0.0003676	8	135	19	262
595	0.0003673	4	132	14	260
596	0.0003946	4	147	16	290
597	0.0004666	4	140	16	276
598	0.0004857	5	137	19	269
599	0.0004923	17	148	19	279
600	0.0004905	9	150	18	291
601	0.0003572	0	129	16	258
602	0.0004682	10	138	16	266
603	0.0003607	4	142	18	280
604	0.0004656	11	130	16	249
605	0.0004698	5	134	19	263
606	0.0003639	0	132	18	264
607	0.0003548	3	134	16	265
608	0.0003421	1	130	14	259
609	0.0005023	9	144	18	279
610	0.0004682	8	141	18	274
611	0.0004863	26	147	18	268
612	0.0004753	2	144	19	286
613	0.0005315	13	149	17	285
614	0.0004814	7	143	19	279
615	0.0004937	11	146	17	281
616	0.0004799	11	139	18	267
617	0.0005072	26	158	17	290
618	0.000468	16	143	18	270
619	0.0004725	4	136	16	268
620	0.0004205	3	142	17	281
621	0.000495	8	140	18	272
622	0.0004972	10	149	18	288
623	0.0005401	13	147	16	281
624	0.000358	7	138	14	269
625	0.0005471	10	145	18	280
626	0.0005024	8	135	17	262
627	0.0005056	12	141	19	270
628	0.000482	6	138	16	270
629	0.0005296	7	140	16	273
630	0.000499	3	137	15	271
631	0.0005044	24	153	18	282
632	0.0004793	20	149	18	278
633	0.0005437	26	146	16	266
634	0.0005087	28	156	15	284
635	0.0003661	1	138	17	275
636	0.0004602	1	140	19	279
637	0.0003483	7	126	17	245
638	0.0004933	3	132	17	261
639	0.0006085	2	141	16	280
640	0.0004564	15	152	17	289
641	0.0005214	8	147	19	286
642	0.0004749	4	141	17	278
643	0.0004687	8	146	19	284
644	0.0004777	2	129	15	256
645	0.0004795	11	138	18	265
646	0.000376	9	137	16	265
647	0.0004835	4	141	16	278
648	0.0004851	11	139	19	267
649	0.0004786	11	149	15	287
650	0.0003588	0	139	17	278
651	0.0003458	5	134	15	263
652	0.0004693	3	131	17	259
653	0.000529	29	149	18	269
654	0.0005054	4	136	13	268
655	0.0004632	6	141	16	276
656	0.0003571	1	128	14	255
657	0.0004885	7	141	18	275
658	0.0004671	8	138	18	268
659	0.00048	28	152	15	276
660	0.0004779	9	142	15	275
661	0.0004748	10	143	16	276
662	0.0004842	4	143	16	282
663	0.0004643	19	146	17	273
664	0.0004769	6	143	17	280
665	0.0004855	5	131	16	257
666	0.000358	3	136	18	269
667	0.000466	6	141	18	276
668	0.0004883	25	156	16	287
669	0.0004766	9	143	15	277
670	0.0004868	13	141	15	269
671	0.0004676	11	137	15	263
672	0.0004674	2	140	18	278
673	0.0004811	9	140	17	271
674	0.0004648	9	139	15	269
675	0.0004664	5	146	17	287
676	0.0004658	7	134	16	261
677	0.0004919	6	140	15	274
678	0.000576	13	141	19	269
679	0.0003667	1	139	16	277
680	0.0004805	15	147	18	279
681	0.0004759	10	133	14	256
682	0.0004804	10	129	13	248
683	0.0003443	3	135	14	267
684	0.0004688	2	130	13	258
685	0.0004688	6	137	17	268
686	0.0004707	5	134	16	263
687	0.0004813	26	156	18	286
688	0.0004703	11	138	15	265
689	0.000478	0	143	16	286
690	0.0004053	2	132	14	262
691	0.0004833	19	144	15	269
692	0.0003692	0	137	14	274
693	0.0003519	2	139	15	276
694	0.0004935	28	149	19	270
695	0.0005156	15	144	17	273
696	0.0004822	9	136	15	263
697	0.0003281	6	141	15	276
698	0.0004091	6	136	18	266
699	0.0004546	3	130	19	257
700	0.0003443	3	131	15	259
701	0.0004662	6	134	18	262
702	0.0004576	8	132	16	256
703	0.00037	4	143	18	282
704	0.0004776	19	151	17	283
705	0.0005111	13	142	16	271
706	0.0004802	0	138	17	276
707	0.0004811	4	149	17	294
708	0.0003658	0	140	16	280
709	0.0005221	10	150	19	290
710	0.0004896	8	140	15	272
711	0.000539	10	143	18	276
712	0.0004943	3	141	19	279
713	0.0004798	24	149	18	274
714	0.0004823	17	147	19	277
715	0.0003515	8	132	15	256
716	0.0003727	3	132	17	261
717	0.000364	3	131	18	259
718	0.0003893	1	142	15	283
719	0.0004627	12	140	19	268
720	0.0004916	33	162	19	291
721	0.0003669	3	136	19	269
722	0.0004746	9	138	17	267
723	0.0004793	11	142	18	273
724	0.0004635	4	137	19	270
725	0.0004711	3	135	17	267
726	0.0004886	4	138	17	272
727	0.0004642	7	139	16	271
728	0.0003698	5	134	18	263
729	0.0004759	7	138	17	269
730	0.0004743	13	142	17	271
731	0.000488	21	151	14	281
732	0.0004782	15	148	16	281
733	0.0004187	5	136	15	267
734	0.0004609	9	131	15	253
735	0.0004693	8	135	18	262
736	0.0004771	17	142	17	267
737	0.0004757	5	136	14	267
738	0.0004854	11	147	17	283
739	0.0004702	6	133	17	260
740	0.0003809	1	134	16	267
741	0.000487	12	141	14	270
742	0.0004856	4	141	19	278
743	0.0004814	8	141	17	274
744	0.0004978	11	148	15	285
745	0.0004992	17	150	18	283
746	0.0004727	6	141	16	276
747	0.0004682	5	142	15	279
748	0.0004921	12	147	16	282
749	0.0004708	5	138	15	271
750	0.0005569	2	140	17	278
751	0.0004656	9	140	13	271
752	0.000481	8	140	19	272
753	0.0005094	20	145	18	270
754	0.0003865	7	140	18	273
755	0.0004814	31	153	18	275
756	0.0003613	3	135	16	267
757	0.0003562	1	137	16	273
758	0.0005069	4	145	19	286
759	0.0005401	7	139	16	271
760	0.0003397	0	130	13	260
761	0.0005688	11	145	17	279
762	0.0003582	4	134	16	264
763	0.0004832	1	130	15	259
764	0.0005167	3	142	16	281
765	0.0005206	10	140	18	270
766	0.0004245	5	145	17	285
767	0.0004915	12	151	19	290
768	0.0003579	1	132	15	263
769	0.0004272	14	139	17	264
770	0.0004955	10	132	18	254
771	0.0003743	6	132	14	258
772	0.0005381	11	140	17	269
773	0.0004743	2	143	18	284
774	0.0004815	8	133	18	258
775	0.0004356	1	140	17	279
776	0.0003719	4	134	16	264
777	0.0004752	12	146	18	280
778	0.0004819	24	153	17	282
779	0.0006163	10	139	17	268
780	0.0004694	13	141	16	269
781	0.0004786	4	134	16	264
782	0.0004739	5	140	17	275
783	0.0004764	14	148	17	282
784	0.0004727	4	139	17	274
785	0.0004639	9	146	18	283
786	0.0003553	4	136	16	268
787	0.0005733	2	138	14	274
788	0.0005248	6	138	15	270
789	0.0003326	2	129	13	256
790	0.0004824	15	141	14	267
791	0.0004105	6	134	15	262
792	0.0004545	9	138	18	267
793	0.0004657	23	159	17	295
794	0.0004971	39	157	19	275
795	0.0003561	3	135	17	267
796	0.0004819	23	147	19	271
797	0.0003582	2	135	17	268
798	0.0003785	3	139	13	275
799	0.0004725	3	140	19	277
800	0.0004656	10	133	13	256
801	0.0004555	16	132	19	248
802	0.0004788	10	138	14	266
803	0.0005511	14	154	19	294
804	0.0005549	6	133	18	260
805	0.0004745	8	143	19	278
806	0.0003742	5	130	14	255
807	0.0003781	1	137	18	273
808	0.0004954	19	148	17	277
809	0.0004943	4	136	16	268
810	0.0004756	5	146	15	287
811	0.0004946	31	154	18	277
812	0.000367	12	143	16	274
813	0.0003659	1	136	15	271
814	0.0004005	1	141	15	281
815	0.0003675	8	136	15	264
816	0.0004624	7	135	16	263
817	0.0003558	7	135	13	263
818	0.0003744	3	134	17	265
819	0.0003662	2	137	18	272
820	0.0003472	1	128	16	255
821	0.0004615	5	131	17	257
822	0.0003711	5	137	15	269
823	0.0004964	10	140	14	270
824	0.0004661	5	132	15	259
825	0.0003913	0	143	15	286
826	0.0005023	18	149	16	280
827	0.0004625	15	143	16	271
828	0.0003679	0	125	14	250
829	0.0004895	2	137	14	272
830	0.0004943	4	138	16	272
831	0.0004686	14	135	14	256
832	0.0004876	19	144	16	269
833	0.0004892	3	140	16	277
834	0.0003417	6	134	15	262
835	0.0004949	1	140	17	279
836	0.0004783	11	140	16	269
837	0.000375	3	138	17	273
838	0.000484	20	147	18	274
839	0.0004729	18	149	17	280
840	0.0004732	8	141	18	274
841	0.0004884	25	151	18	277
842	0.000367	2	138	16	274
843	0.0004854	6	140	16	274
844	0.000511	9	138	18	267
845	0.0004636	2	139	16	276
846	0.0004657	29	153	18	277
847	0.0004008	2	129	16	256
848	0.000373	2	133	15	264
849	0.0005481	8	146	19	284
850	0.0005256	0	133	17	266
851	0.0004844	21	150	19	279
852	0.0004631	12	143	18	274
853	0.0004821	4	139	14	274
854	0.0004987	15	147	16	279
855	0.0003673	2	128	13	254
856	0.000469	8	140	17	272
857	0.0003711	1	131	15	261
858	0.0004824	13	148	19	283
859	0.0004849	15	157	17	299
860	0.0004677	7	134	18	261
861	0.0003751	6	133	14	260
862	0.0004029	3	142	17	281
863	0.0004881	18	148	17	278
864	0.0004736	3	136	16	269
865	0.000481	11	145	18	279
866	0.0004801	10	146	16	282
867	0.000511	10	148	19	286
868	0.0004943	6	138	15	270
869	0.0004996	16	141	18	266
870	0.0004736	12	142	17	272
871	0.0004815	1	140	17	279
872	0.0004794	3	128	18	253
873	0.0004781	29	150	18	271
874	0.0004642	13	139	15	265
875	0.0004664	0	135	19	270
876	0.0005062	5	144	16	283
877	0.0004753	15	147	18	279
878	0.0003582	1	126	14	251
879	0.0004722	15	145	19	275
880	0.0004676	19	138	15	257
881	0.0005215	14	151	14	288
882	0.0004833	7	142	19	277
883	0.0004799	17	138	17	259
884	0.0003841	1	135	17	269
885	0.0003556	5	133	15	261
886	0.0004693	12	150	19	288
887	0.0004703	8	140	15	272
888	0.0004881	20	147	16	274
889	0.0005191	4	144	17	284
890	0.0005439	6	136	14	266
891	0.0003728	5	134	14	263
892	0.0004763	2	131	13	260
893	0.0004686	10	142	17	274
894	0.0003656	2	136	17	270
895	0.0005425	17	147	15	277
896	0.0004913	28	146	19	264
897	0.0003741	1	132	16	263
898	0.0004702	6	137	15	268
899	0.0004689	16	148	18	280
900	0.0005043	14	151	19	288
901	0.0004581	0	138	18	276
902	0.0003805	5	141	19	277
903	0.0005071	22	147	17	272
904	0.0004657	4	132	14	260
905	0.0004729	3	139	18	275
906	0.0004788	4	138	16	272
907	0.0004841	10	146	15	282
908	0.0004764	12	145	17	278
909	0.0004609	6	141	18	276
910	0.0004872	22	153	19	284
911	0.0003722	0	137	16	274
912	0.0004586	17	143	14	269
913	0.0005023	9	149	15	289
914	0.0004898	28	140	14	252
915	0.0003587	4	136	16	268
916	0.000483	1	136	19	271
917	0.0004735	13	135	19	257
918	0.0003879	17	142	16	267
919	0.0003981	1	139	14	277
920	0.0004753	10	143	15	276
921	0.0003604	3	131	17	259
922	0.0004913	3	141	17	279
923	0.0004942	3	145	16	287
924	0.0004653	3	140	17	277
925	0.000367	6	142	17	278
926	0.000476	6	138	14	270
927	0.0004819	0	134	14	268
928	0.0004915	9	146	18	283
929	0.0004717	13	144	18	275
930	0.0005048	10	141	19	272
931	0.0004603	3	141	16	279
932	0.0004819	40	162	18	284
933	0.0004789	26	161	19	296
934	0.0005057	7	143	16	279
935	0.0004864	10	143	15	276
936	0.0005025	5	140	15	275
937	0.0003577	4	143	16	282
938	0.0004856	7	143	19	279
939	0.0004767	6	143	17	280
940	0.0004723	10	139	16	268
941	0.0004819	10	144	16	278
942	0.0005029	7	135	17	263
943	0.0005019	5	133	15	261
944	0.0004763	18	145	15	272
945	0.0004836	12	137	14	262
946	0.000499	7	146	16	285
947	0.000464	3	139	19	275
948	0.0004617	6	138	14	270
949	0.0004648	5	142	14	279
950	0.0004868	4	130	16	256
951	0.0004724	9	134	13	259
952	0.000475	7	137	16	267
953	0.0004835	3	137	19	271
954	0.0003735	5	142	13	279
955	0.0004681	9	144	19	279
956	0.0004828	18	139	18	260
957	0.0005147	12	135	15	258
958	0.0004839	4	141	17	278
959	0.0004723	14	143	18	272
960	0.0004871	4	134	17	264
961	0.0004798	18	141	17	264
962	0.0004951	19	143	15	267
963	0.0004882	12	140	15	268
964	0.0004725	10	149	18	288
965	0.0003694	3	131	15	259
966	0.0004721	15	144	14	273
967	0.0004883	16	145	19	274
968	0.000373	0	133	19	266
969	0.0004868	10	147	19	284
970	0.0004709	16	133	15	250
971	0.0003771	3	139	18	275
972	0.0003939	1	139	19	277
973	0.0003547	4	142	15	280
974	0.0004817	25	158	19	291
975	0.0005063	8	140	17	272
976	0.0003704	6	132	17	258
977	0.0004669	17	145	16	273
978	0.0004551	4	135	17	266
979	0.0003553	1	124	15	247
980	0.0005216	6	130	13	254
981	0.0004905	7	147	18	287
982	0.0003628	1	136	16	271
983	0.0004824	6	148	18	290
984	0.0004668	27	152	16	277
985	0.0005571	12	144	18	276
986	0.0003493	5	137	15	269
987	0.0004808	2	146	18	290
988	0.0003716	1	132	18	263
989	0.0004764	9	150	17	291
990	0.0003564	1	133	13	265
991	0.0004803	14	144	17	274
992	0.0004729	5	137	17	269
993	0.0004911	7	132	15	257
994	0.0004934	19	146	15	273
995	0.0005139	5	141	17	277
996	0.0005543	16	150	17	284
997	0.0004556	2	138	18	274
998	0.0004585	9	138	16	267
999	0.0004676	16	136	16	256
mean	0.000460181	8.93	140.262	16.436	271.594

## Sheet: PowerBalance_Bal
	time	SEq	Bal	Reg	Egal
0	0.0005235	9	140	18	271
1	0.0004676	3	135	17	267
2	0.0003588	1	139	15	277
3	0.0003488	0	136	15	272
4	0.0005451	13	144	18	275
5	0.0005103	9	143	17	277
6	0.0003939	8	144	18	280
7	0.0005361	28	153	17	278
8	0.0003683	1	133	16	265
9	0.000486	19	140	18	261
10	0.0005413	15	147	18	279
11	0.0003573	2	133	15	264
12	0.0004818	2	136	13	270
13	0.00058	23	152	16	281
14	0.000468	10	144	17	278
15	0.0004995	18	141	19	264
16	0.0005119	11	142	16	273
17	0.0003475	0	131	14	262
18	0.0004716	6	140	15	274
19	0.0004665	7	139	14	271
20	0.0006783	10	142	18	274
21	0.0003558	2	137	15	272
22	0.0003757	1	135	17	269
23	0.0004961	14	129	14	244
24	0.0005169	3	136	15	269
25	0.0003698	4	145	19	286
26	0.0003407	3	129	15	255
27	0.0003708	4	143	17	282
28	0.0005392	1	140	15	279
29	0.0003627	5	128	14	251
30	0.0003683	6	131	13	256
31	0.0005033	15	145	19	275
32	0.0003861	12	135	18	258
33	0.0004796	4	133	17	262
34	0.0004924	10	143	15	276
35	0.0003709	5	134	17	263
36	0.0003645	2	144	15	286
37	0.0004728	0	133	18	266
38	0.0004854	23	146	14	269
39	0.0004878	32	153	15	274
40	0.0004653	10	136	13	262
41	0.0004622	11	132	16	253
42	0.0003588	6	140	17	274
43	0.0005795	11	139	15	267
44	0.0004677	10	142	18	274
45	0.0004738	1	132	19	263
46	0.000486	21	144	18	267
47	0.0004747	11	141	15	271
48	0.0005016	32	150	15	268
49	0.0004652	4	138	15	272
50	0.0004945	27	152	18	277
51	0.0004916	19	150	18	281
52	0.0005437	5	135	18	265
53	0.0004949	21	142	17	263
54	0.0004772	16	144	16	272
55	0.0004805	5	137	17	269
56	0.0004871	16	149	17	282
57	0.0003955	3	136	17	269
58	0.0003668	11	133	13	255
59	0.0003667	4	132	17	260
60	0.0004721	6	144	17	282
61	0.0004847	14	136	15	258
62	0.0004677	11	140	18	269
63	0.0004946	9	143	18	277
64	0.0004975	28	155	19	282
65	0.0004809	7	138	13	269
66	0.0004702	3	129	17	255
67	0.0003599	5	136	15	267
68	0.0004902	3	141	19	279
69	0.0004888	13	149	17	285
70	0.0004978	6	138	14	270
71	0.0003705	3	141	17	279
72	0.0004775	12	150	17	288
73	0.0004949	21	141	15	261
74	0.0004799	5	140	18	275
75	0.0004848	9	139	17	269
76	0.0005066	20	147	18	274
77	0.0003604	2	137	15	272
78	0.0004644	5	138	14	271
79	0.0005352	22	151	18	280
80	0.0004583	6	134	14	262
81	0.0005073	14	148	17	282
82	0.0004642	18	146	19	274
83	0.0005031	12	139	16	266
84	0.000363	5	138	13	271
85	0.0004827	1	145	19	289
86	0.0004731	19	133	15	247
87	0.0004103	9	144	16	279
88	0.0004846	14	143	17	272
89	0.0004764	2	136	15	270
90	0.0004763	23	150	17	277
91	0.0005068	6	135	16	264
92	0.0004806	23	155	19	287
93	0.0004655	8	138	18	268
94	0.000539	8	141	18	274
95	0.0005081	17	150	15	283
96	0.0004839	1	139	18	277
97	0.0004769	7	142	15	277
98	0.0004733	6	141	16	276
99	0.000492	4	134	15	264
100	0.0003667	5	138	15	271
101	0.0004627	17	141	15	265
102	0.000477	32	156	19	280
103	0.0005526	31	154	18	277
104	0.0004893	29	155	16	281
105	0.0003713	4	134	17	264
106	0.0004714	10	148	18	286
107	0.0004729	6	136	17	266
108	0.0004665	2	132	17	262
109	0.0004703	15	151	16	287
110	0.0004791	31	154	18	277
111	0.0004752	18	149	17	280
112	0.0005035	7	142	14	277
113	0.000471	0	134	16	268
114	0.0005059	8	146	17	284
115	0.0004768	6	135	15	264
116	0.0003801	2	130	15	258
117	0.0003697	4	139	16	274
118	0.000493	5	137	13	269
119	0.0004765	9	135	14	261
120	0.0004828	13	138	16	263
121	0.0004923	6	137	17	268
122	0.000465	8	137	19	266
123	0.0004618	2	127	17	252
124	0.0004662	2	142	19	282
125	0.0003536	2	127	13	252
126	0.0004701	6	138	14	270
127	0.0005221	14	142	15	270
128	0.0003638	0	133	16	266
129	0.0004711	15	148	18	281
130	0.0005023	12	138	15	264
131	0.0004586	3	130	16	257
132	0.0003755	2	143	15	284
133	0.000484	18	134	13	250
134	0.0004601	2	143	18	284
135	0.000474	4	138	16	272
136	0.0003856	5	136	14	267
137	0.0004629	7	130	15	253
138	0.0004926	29	155	19	281
139	0.0004864	0	131	15	262
140	0.0004763	15	138	14	261
141	0.0005062	24	146	17	268
142	0.0004808	5	144	16	283
143	0.0004764	2	133	14	264
144	0.0003547	6	135	18	264
145	0.0005925	0	139	16	278
146	0.0003565	3	131	18	259
147	0.0004769	12	149	17	286
148	0.0004829	18	155	18	292
149	0.0003636	11	140	16	269
150	0.0004701	5	141	15	277
151	0.0003615	3	133	14	263
152	0.0005062	9	140	15	271
153	0.0004697	8	141	17	274
154	0.0004771	25	147	16	269
155	0.000469	6	143	17	280
156	0.0004055	1	137	18	273
157	0.000347	0	132	17	264
158	0.0003742	1	127	12	253
159	0.0004607	15	144	19	273
160	0.0005963	16	138	15	260
161	0.0003725	0	138	18	276
162	0.0004878	19	148	17	277
163	0.0004906	19	154	17	289
164	0.0004697	13	144	16	275
165	0.0004887	3	136	19	269
166	0.0004863	6	146	17	286
167	0.0004762	15	142	16	269
168	0.0004672	7	149	19	291
169	0.0004691	7	138	19	269
170	0.0004715	2	142	18	282
171	0.0004773	4	139	15	274
172	0.0004647	5	136	13	267
173	0.0004858	23	146	15	269
174	0.0004855	6	141	16	276
175	0.0004935	6	142	13	278
176	0.0004685	23	142	17	261
177	0.0003642	1	140	15	279
178	0.0004627	9	146	17	283
179	0.0004925	15	143	15	271
180	0.0004772	6	130	14	254
181	0.0004685	7	142	16	277
182	0.0004714	9	134	16	259
183	0.0004806	7	145	16	283
184	0.0004605	8	136	17	264
185	0.0003675	1	132	19	263
186	0.0005102	6	141	13	276
187	0.0004715	7	127	15	247
188	0.0005176	37	166	18	295
189	0.0003621	3	137	15	271
190	0.0004843	17	132	16	247
191	0.0005322	4	138	18	272
192	0.0004559	12	137	17	262
193	0.0004819	15	145	16	275
194	0.0004735	21	149	15	277
195	0.0005092	5	134	18	263
196	0.0003517	4	131	14	258
197	0.0004743	13	140	17	267
198	0.000481	19	148	16	277
199	0.0005049	10	147	18	284
200	0.0004674	10	133	14	256
201	0.0005345	15	145	18	275
202	0.0004794	10	142	16	274
203	0.0005424	6	143	18	280
204	0.0004827	14	152	18	290
205	0.0005064	4	138	16	272
206	0.0004616	12	137	14	262
207	0.0005523	5	140	16	275
208	0.0004677	2	137	17	272
209	0.0004668	13	144	19	275
210	0.0004916	12	142	19	272
211	0.0003634	4	135	16	266
212	0.0004889	17	146	16	275
213	0.0005167	14	148	19	282
214	0.0004719	8	148	16	288
215	0.0004765	3	139	13	275
216	0.0005596	20	143	15	266
217	0.0004635	3	132	16	261
218	0.00048	4	132	14	260
219	0.0004974	22	152	16	282
220	0.0004805	3	138	17	273
221	0.0004813	1	138	17	275
222	0.0003547	1	132	16	263
223	0.0003818	2	134	14	266
224	0.0004678	17	144	19	271
225	0.0004933	16	145	18	274
226	0.0004899	10	145	19	280
227	0.0003616	2	133	18	264
228	0.000462	9	143	17	277
229	0.0004688	4	129	15	254
230	0.0004742	26	152	14	278
231	0.0003291	4	134	14	264
232	0.0004645	1	136	17	271
233	0.0005128	18	141	19	264
234	0.0004889	12	142	15	272
235	0.0004796	4	136	13	268
236	0.0004702	2	134	16	266
237	0.0004857	2	143	17	284
238	0.0004724	18	149	16	280
239	0.0004658	9	135	17	261
240	0.000483	14	144	15	274
241	0.0003669	0	133	16	266
242	0.0004684	13	147	16	281
243	0.0004795	9	148	19	287
244	0.000465	5	138	16	271
245	0.0003902	4	132	15	260
246	0.00049	14	139	16	264
247	0.000495	4	142	16	280
248	0.0004725	5	135	15	265
249	0.0004785	9	144	19	279
250	0.0003855	5	141	16	277
251	0.000356	8	135	15	262
252	0.0004971	24	156	19	288
253	0.0003472	1	129	15	257
254	0.0005141	19	151	18	283
255	0.0005092	3	146	17	289
256	0.00048	11	140	17	269
257	0.000479	13	139	14	265
258	0.0004871	6	140	17	274
259	0.0004889	14	142	18	270
260	0.0005009	9	143	15	277
261	0.0004811	19	147	17	275
262	0.0003983	1	133	18	265
263	0.0004571	2	134	17	266
264	0.0004948	25	146	19	267
265	0.0004706	3	139	17	275
266	0.0004634	17	144	16	271
267	0.0004841	13	151	17	289
268	0.0004958	14	143	15	272
269	0.0004711	12	135	17	258
270	0.0004825	20	147	16	274
271	0.0004993	9	144	16	279
272	0.0004744	5	139	16	273
273	0.0004623	7	131	17	255
274	0.0004976	19	153	17	287
275	0.0004614	12	134	17	256
276	0.0004863	19	147	16	275
277	0.0004997	7	137	18	267
278	0.0004792	13	139	14	265
279	0.0004749	0	140	19	280
280	0.0004704	19	155	19	291
281	0.0004636	12	147	17	282
282	0.0004827	6	143	18	280
283	0.0004544	12	130	16	248
284	0.0005	5	138	14	271
285	0.0003845	2	138	16	274
286	0.0003789	10	143	14	276
287	0.0004824	11	140	16	269
288	0.0004546	9	142	19	275
289	0.0003709	4	136	15	268
290	0.0003615	13	150	17	287
291	0.000549	21	152	17	283
292	0.0005001	3	136	18	269
293	0.0003836	1	128	14	255
294	0.0004859	3	142	19	281
295	0.0003674	3	143	17	283
296	0.0004904	3	139	17	275
297	0.0005156	23	142	18	261
298	0.0004784	15	142	15	269
299	0.0004695	14	137	15	260
300	0.0003589	4	136	17	268
301	0.0004073	11	133	17	255
302	0.0004694	9	138	15	267
303	0.0005169	15	137	17	259
304	0.0003597	8	142	16	276
305	0.0003897	3	139	17	275
306	0.0004743	15	147	19	279
307	0.0004857	3	139	18	275
308	0.0006117	4	145	18	286
309	0.0005301	23	147	18	271
310	0.0004603	4	140	18	276
311	0.0004962	40	157	19	274
312	0.0004756	4	142	16	280
313	0.0005594	33	157	15	281
314	0.000474	3	138	19	273
315	0.0004747	10	141	17	272
316	0.0005058	9	137	15	265
317	0.0004796	26	148	15	270
318	0.0004588	6	137	19	268
319	0.0004928	17	137	15	257
320	0.0004598	12	137	18	262
321	0.0004922	30	150	18	270
322	0.000385	5	134	14	263
323	0.000486	17	146	19	275
324	0.0003718	12	135	19	258
325	0.0004609	3	128	16	253
326	0.0004796	3	143	16	283
327	0.0003352	1	128	15	255
328	0.0004723	9	142	16	275
329	0.0005102	9	136	19	263
330	0.0003375	3	130	13	257
331	0.0003458	8	134	14	260
332	0.000484	5	143	17	281
333	0.0003524	0	137	17	274
334	0.0004764	25	153	16	281
335	0.0003708	1	136	15	271
336	0.0004689	6	136	15	266
337	0.0004772	1	137	16	273
338	0.0004733	12	145	19	278
339	0.0004851	8	135	15	262
340	0.000461	6	138	17	270
341	0.0004882	29	156	17	283
342	0.0003832	6	139	14	272
343	0.0005212	36	159	15	282
344	0.0003769	1	137	19	273
345	0.0004824	10	141	17	272
346	0.0003695	6	131	18	256
347	0.0004595	5	137	18	269
348	0.0004857	1	134	15	267
349	0.0004831	22	157	17	292
350	0.0005213	39	164	19	289
351	0.0005041	6	140	17	274
352	0.0004587	12	142	17	272
353	0.000473	8	141	15	274
354	0.000469	4	140	15	276
355	0.0004889	11	134	15	257
356	0.0004933	8	135	14	262
357	0.0003657	3	137	17	271
358	0.000388	1	136	16	271
359	0.0004733	0	133	15	266
360	0.0003553	0	138	15	276
361	0.0004837	4	139	17	274
362	0.0004636	1	134	13	267
363	0.0005151	1	139	16	277
364	0.0004797	16	143	15	270
365	0.0004644	4	136	18	268
366	0.0005597	3	141	16	279
367	0.0004636	11	136	14	261
368	0.0004614	4	138	16	272
369	0.0004693	5	137	18	269
370	0.0005163	2	142	17	282
371	0.0004765	8	139	19	270
372	0.0003702	3	136	15	269
373	0.0004776	11	147	16	283
374	0.0005003	21	153	16	285
375	0.0004687	6	137	15	268
376	0.0004822	8	145	17	282
377	0.000477	10	141	16	272
378	0.0003906	5	129	15	253
379	0.0005038	6	143	19	280
380	0.0004918	7	144	18	281
381	0.000486	2	140	15	278
382	0.0005148	21	141	13	261
383	0.0005103	12	145	16	278
384	0.0004894	24	145	15	266
385	0.0004805	11	139	16	267
386	0.0005086	12	136	13	260
387	0.0005233	22	135	14	248
388	0.000509	11	149	17	287
389	0.000367	5	137	15	269
390	0.0004872	1	136	18	271
391	0.0003789	10	139	16	268
392	0.0004966	9	138	15	267
393	0.0005283	20	138	18	256
394	0.0003816	4	136	17	268
395	0.0003539	0	130	13	260
396	0.0004577	13	140	17	267
397	0.000497	3	134	15	265
398	0.0004946	33	153	18	273
399	0.0004976	9	141	17	273
400	0.0004288	2	131	14	260
401	0.0005063	13	144	15	275
402	0.0004708	12	141	16	270
403	0.0004774	6	141	14	276
404	0.0003811	0	134	15	268
405	0.0004793	3	133	14	263
406	0.0004742	4	142	15	280
407	0.0003656	2	134	15	266
408	0.0005345	5	142	16	279
409	0.0004651	12	139	16	266
410	0.0004624	11	135	14	259
411	0.0004489	2	131	18	260
412	0.0003531	0	134	14	268
413	0.0004749	12	149	18	286
414	0.0004774	15	147	16	279
415	0.0003564	0	139	15	278
416	0.000489	7	138	16	269
417	0.0004951	17	144	14	271
418	0.0004833	13	143	17	273
419	0.0004966	9	149	18	289
420	0.0004847	13	146	16	279
421	0.0003565	1	131	14	261
422	0.0004754	18	141	19	264
423	0.000365	1	135	18	269
424	0.0004872	19	140	16	261
425	0.0004841	28	155	19	282
426	0.0003653	5	142	16	279
427	0.000475	2	134	13	266
428	0.0005335	0	138	18	276
429	0.0004632	16	141	13	266
430	0.0003562	5	138	15	271
431	0.0005778	12	147	17	282
432	0.0004856	24	150	18	276
433	0.000497	21	141	18	261
434	0.0004663	6	135	16	264
435	0.0004783	1	133	19	265
436	0.0003644	3	132	13	261
437	0.0004934	13	140	16	267
438	0.0004708	2	134	14	266
439	0.0004615	3	131	18	259
440	0.0004109	1	132	18	263
441	0.0004733	9	138	15	267
442	0.0003668	17	136	17	255
443	0.0004939	11	137	14	263
444	0.0003413	4	131	15	258
445	0.0003586	8	134	14	260
446	0.0004525	4	138	16	272
447	0.0004859	9	137	13	265
448	0.0004929	21	147	15	273
449	0.0004768	14	143	17	272
450	0.000495	1	138	18	275
451	0.0003554	0	133	16	266
452	0.0004739	9	143	17	277
453	0.0004712	7	137	16	267
454	0.0003686	0	140	16	280
455	0.000364	1	134	14	267
456	0.0004667	14	147	18	280
457	0.0004685	6	137	17	268
458	0.0004985	1	132	15	263
459	0.000358	1	139	16	277
460	0.0004775	0	134	15	268
461	0.0005782	12	142	18	272
462	0.0004695	15	146	17	277
463	0.0003695	3	135	18	267
464	0.0003587	4	138	16	272
465	0.000475	5	137	16	269
466	0.0004683	8	146	16	284
467	0.0004823	18	150	17	282
468	0.0004762	16	145	18	274
469	0.0004611	6	136	17	266
470	0.0003785	3	138	17	273
471	0.0004752	12	147	18	282
472	0.0004911	10	136	14	262
473	0.0004657	2	140	19	278
474	0.0004753	5	135	14	265
475	0.0003589	3	127	13	251
476	0.0005125	25	152	17	279
477	0.0005472	7	141	14	275
478	0.0004724	15	144	16	273
479	0.0005699	0	137	16	274
480	0.0004499	4	134	19	264
481	0.0003759	3	128	17	253
482	0.0004696	8	139	19	270
483	0.0003738	3	133	14	263
484	0.0004496	12	139	19	266
485	0.0004771	8	137	15	266
486	0.0004726	12	136	16	260
487	0.0005064	11	142	14	273
488	0.0004694	13	142	16	271
489	0.0005072	13	137	17	261
490	0.0004713	5	135	16	265
491	0.0005282	11	146	17	281
492	0.0004783	15	140	19	265
493	0.0004744	8	151	18	294
494	0.0003727	0	136	17	272
495	0.0003786	1	139	16	277
496	0.0003628	2	140	18	278
497	0.0004889	6	142	17	278
498	0.0004987	16	154	18	292
499	0.0004767	11	142	14	273
500	0.0004657	0	135	15	270
501	0.0004626	3	138	16	273
502	0.0004757	4	131	18	258
503	0.0003524	5	138	16	271
504	0.0003684	3	143	14	283
505	0.0004587	5	133	18	261
506	0.0004696	2	138	17	274
507	0.0004673	7	141	15	275
508	0.0004768	30	158	19	286
509	0.0004073	2	133	16	264
510	0.0004883	4	143	16	282
511	0.0005172	6	141	16	276
512	0.000478	29	145	16	261
513	0.0003605	1	126	18	251
514	0.0004006	2	135	15	268
515	0.0005266	21	143	19	265
516	0.00051	8	142	15	276
517	0.0004576	4	135	14	266
518	0.0004675	19	141	16	263
519	0.000407	2	134	13	266
520	0.0008881	1	144	18	287
521	0.0003663	10	133	14	256
522	0.0005029	2	140	15	278
523	0.0004807	15	145	17	275
524	0.0004632	8	135	16	262
525	0.0004809	2	135	15	268
526	0.0004625	2	140	17	278
527	0.0005219	3	139	16	275
528	0.0004753	25	137	16	249
529	0.0004623	22	145	18	268
530	0.0005201	5	142	17	279
531	0.0003648	6	139	17	272
532	0.0004896	10	135	13	260
533	0.0004629	4	134	17	264
534	0.0004763	1	136	16	271
535	0.0004647	3	135	15	267
536	0.0004824	1	140	19	279
537	0.000363	0	127	14	254
538	0.0003615	4	129	14	254
539	0.0004905	1	142	16	283
540	0.000539	17	147	16	277
541	0.0004548	8	132	15	256
542	0.0004696	19	147	18	275
543	0.0004815	13	147	16	281
544	0.0004751	11	144	18	277
545	0.0005073	22	146	15	270
546	0.0003361	1	129	15	257
547	0.0004677	22	149	17	276
548	0.0004757	7	138	16	269
549	0.0004832	16	141	17	266
550	0.0004544	1	130	16	259
551	0.00046	3	139	18	275
552	0.0004673	8	137	15	266
553	0.0005621	12	138	19	264
554	0.0005368	8	143	19	278
555	0.0004622	6	137	14	268
556	0.0003428	0	127	13	254
557	0.0004789	14	134	17	254
558	0.0004929	2	146	16	290
559	0.0005169	5	139	16	273
560	0.0004803	4	138	16	272
561	0.0004895	11	145	19	279
562	0.0004928	5	145	17	285
563	0.0004779	14	139	16	264
564	0.000499	43	165	18	287
565	0.0004761	5	139	15	273
566	0.0004826	5	139	18	273
567	0.0004679	27	154	18	281
568	0.00036	3	132	15	261
569	0.0003551	0	137	14	274
570	0.0004594	13	137	15	261
571	0.00048	5	139	17	273
572	0.0004486	8	137	17	266
573	0.0005081	4	140	17	276
574	0.0004822	13	149	16	285
575	0.0004806	9	142	19	275
576	0.0003795	1	143	16	285
577	0.0004708	13	138	15	263
578	0.0004867	12	144	19	276
579	0.0005014	9	141	15	273
580	0.0004692	6	137	15	268
581	0.0004744	13	138	18	263
582	0.0005048	4	136	18	268
583	0.0003403	3	134	15	265
584	0.0004784	8	137	18	266
585	0.0004869	9	135	16	261
586	0.000479	1	137	15	273
587	0.0004851	0	133	14	266
588	0.0004738	0	129	14	258
589	0.000488	5	133	15	261
590	0.0004913	7	141	15	275
591	0.0004816	16	153	16	290
592	0.0004774	4	137	17	270
593	0.0005138	39	156	18	273
594	0.0003776	8	135	19	262
595	0.0003657	4	132	14	260
596	0.0003837	4	147	16	290
597	0.0004748	4	140	16	276
598	0.0005093	5	137	19	269
599	0.0004797	17	148	19	279
600	0.0004126	1	144	18	287
601	0.0003611	0	129	16	258
602	0.0004192	10	138	16	266
603	0.0003724	4	142	18	280
604	0.0005059	11	130	16	249
605	0.0004705	5	134	19	263
606	0.0003883	0	132	18	264
607	0.0004265	3	134	16	265
608	0.0003544	1	130	14	259
609	0.0005978	33	159	19	285
610	0.0005162	8	141	18	274
611	0.0004614	26	147	18	268
612	0.0004678	2	144	19	286
613	0.0004701	13	149	17	285
614	0.0004788	7	143	19	279
615	0.0005	11	146	17	281
616	0.0005315	11	139	18	267
617	0.0005047	26	158	17	290
618	0.0004692	16	143	18	270
619	0.0004613	6	136	15	266
620	0.0003728	3	142	17	281
621	0.0005143	8	140	18	272
622	0.0004954	12	148	15	284
623	0.0005888	13	147	16	281
624	0.0003657	7	138	14	269
625	0.0004942	10	145	18	280
626	0.000502	8	135	17	262
627	0.0004913	5	138	19	271
628	0.0004824	6	138	16	270
629	0.0004739	7	140	16	273
630	0.0004721	3	137	15	271
631	0.0005672	24	153	18	282
632	0.0005175	20	149	18	278
633	0.0004796	26	146	16	266
634	0.0004939	28	156	15	284
635	0.0003728	1	138	17	275
636	0.0004798	1	140	19	279
637	0.0003481	7	126	17	245
638	0.0004696	3	132	17	261
639	0.0004972	2	141	16	280
640	0.0005076	15	152	17	289
641	0.0004862	10	147	18	284
642	0.0004712	4	141	17	278
643	0.0004738	8	146	19	284
644	0.0004946	2	129	15	256
645	0.0003601	6	134	14	262
646	0.0003807	9	137	16	265
647	0.000488	4	141	16	278
648	0.0005497	11	139	19	267
649	0.0004941	11	149	15	287
650	0.0003699	0	139	17	278
651	0.0003562	5	134	15	263
652	0.0004666	3	131	17	259
653	0.0005337	11	141	16	271
654	0.000358	4	136	13	268
655	0.0004772	6	141	16	276
656	0.0003558	1	128	14	255
657	0.0004961	7	141	18	275
658	0.0004984	8	138	18	268
659	0.0004853	28	152	15	276
660	0.0004959	9	142	15	275
661	0.0004682	13	143	14	273
662	0.0004578	4	143	16	282
663	0.0004747	19	146	17	273
664	0.0004751	6	143	17	280
665	0.0004664	5	131	16	257
666	0.0003615	3	136	18	269
667	0.0004763	6	141	18	276
668	0.0004791	25	156	16	287
669	0.000484	9	143	15	277
670	0.0005139	2	139	17	276
671	0.0004833	15	136	15	257
672	0.000457	2	140	18	278
673	0.0005178	9	140	17	271
674	0.0005262	9	139	15	269
675	0.0004749	5	146	17	287
676	0.0004669	7	134	16	261
677	0.0005744	6	140	15	274
678	0.0005105	13	141	19	269
679	0.0003529	1	139	16	277
680	0.0004589	15	147	18	279
681	0.0004854	10	133	14	256
682	0.0004602	10	129	13	248
683	0.0003678	3	135	14	267
684	0.0004959	2	130	13	258
685	0.0005019	6	137	17	268
686	0.0004554	5	134	16	263
687	0.0004781	26	156	18	286
688	0.0004882	11	138	15	265
689	0.0004913	6	147	16	288
690	0.0003589	2	132	14	262
691	0.0004966	19	144	15	269
692	0.0003682	0	137	14	274
693	0.000389	2	139	15	276
694	0.0004953	28	149	19	270
695	0.000482	15	144	17	273
696	0.0005182	9	136	15	263
697	0.0003972	6	141	15	276
698	0.0003708	6	136	18	266
699	0.0004991	3	130	19	257
700	0.00036	3	131	15	259
701	0.0004776	6	134	18	262
702	0.0004592	8	132	16	256
703	0.0004542	4	143	18	282
704	0.0004848	19	151	17	283
705	0.0004688	13	142	16	271
706	0.0005224	0	138	17	276
707	0.0005484	4	149	17	294
708	0.0004809	13	143	17	273
709	0.0004989	10	150	19	290
710	0.0004913	8	140	15	272
711	0.0004811	10	143	18	276
712	0.0004826	3	141	19	279
713	0.0004639	24	149	18	274
714	0.0004845	17	147	19	277
715	0.0003749	8	132	15	256
716	0.0003616	3	132	17	261
717	0.0003788	3	131	18	259
718	0.0003704	1	142	15	283
719	0.0004661	12	140	19	268
720	0.0005454	33	162	19	291
721	0.0004127	3	136	19	269
722	0.0004882	9	138	17	267
723	0.0004875	11	142	18	273
724	0.0004599	4	137	19	270
725	0.000466	3	135	17	267
726	0.0004899	4	138	17	272
727	0.0004979	7	139	16	271
728	0.0003895	5	134	18	263
729	0.0004739	15	142	15	269
730	0.000469	13	142	17	271
731	0.0004944	21	151	14	281
732	0.0004893	15	148	16	281
733	0.0003778	5	136	15	267
734	0.0005133	9	131	15	253
735	0.0004885	8	135	18	262
736	0.0004599	17	142	17	267
737	0.0005171	5	136	14	267
738	0.0004847	11	147	17	283
739	0.000475	6	133	17	260
740	0.0004689	1	134	16	267
741	0.0004815	12	141	14	270
742	0.0004701	4	141	19	278
743	0.0004615	8	141	17	274
744	0.000464	11	148	15	285
745	0.0005299	25	148	16	271
746	0.0004598	6	141	16	276
747	0.0004833	5	142	15	279
748	0.0005316	12	147	16	282
749	0.0004722	5	138	15	271
750	0.0005032	2	140	17	278
751	0.0005361	9	140	13	271
752	0.0004599	8	140	19	272
753	0.0004917	20	145	18	270
754	0.0003686	7	140	18	273
755	0.0005516	18	145	18	272
756	0.0003743	3	135	16	267
757	0.0003484	1	137	16	273
758	0.0005359	4	145	19	286
759	0.0004847	7	139	16	271
760	0.0003555	0	130	13	260
761	0.0005074	11	145	17	279
762	0.00036	4	134	16	264
763	0.0004758	1	130	15	259
764	0.0005501	3	142	16	281
765	0.0004822	10	140	18	270
766	0.0003587	5	145	17	285
767	0.0004833	16	146	18	276
768	0.000369	1	132	15	263
769	0.000377	14	139	17	264
770	0.0004715	10	132	18	254
771	0.0003914	6	132	14	258
772	0.000477	11	140	17	269
773	0.0004802	2	143	18	284
774	0.0004581	8	133	18	258
775	0.0004726	1	140	17	279
776	0.000372	4	134	16	264
777	0.0004645	12	146	18	280
778	0.0004741	24	153	17	282
779	0.0004763	10	139	17	268
780	0.0004653	13	141	16	269
781	0.0004541	4	134	16	264
782	0.0004624	5	140	17	275
783	0.0003706	14	148	17	282
784	0.0004576	4	139	17	274
785	0.0004753	10	143	16	276
786	0.0003558	4	136	16	268
787	0.0004732	2	138	14	274
788	0.0004803	6	138	15	270
789	0.0003521	2	129	13	256
790	0.0004639	4	134	14	264
791	0.0004167	6	134	15	262
792	0.0005008	9	138	18	267
793	0.0004847	28	154	17	280
794	0.0005127	39	157	19	275
795	0.0003565	3	135	17	267
796	0.000479	24	139	17	254
797	0.0003544	2	135	17	268
798	0.0004065	3	139	13	275
799	0.0004644	12	142	19	272
800	0.000473	10	133	13	256
801	0.000506	16	132	19	248
802	0.0004697	10	138	14	266
803	0.0004781	14	154	19	294
804	0.000606	6	133	18	260
805	0.0004722	8	143	19	278
806	0.0003623	5	130	14	255
807	0.00042	1	137	18	273
808	0.0005943	29	148	17	267
809	0.0004762	4	136	16	268
810	0.0004744	5	146	15	287
811	0.0004933	31	154	18	277
812	0.0003727	12	143	16	274
813	0.0003588	1	136	15	271
814	0.0004268	1	141	15	281
815	0.0004111	8	136	15	264
816	0.0004754	7	135	16	263
817	0.0004083	7	135	13	263
818	0.0003629	3	134	17	265
819	0.0003653	2	137	18	272
820	0.0003561	1	128	16	255
821	0.000488	5	131	17	257
822	0.0005213	5	137	15	269
823	0.0004759	10	140	14	270
824	0.0005007	5	132	15	259
825	0.0003641	0	143	15	286
826	0.0004825	18	149	16	280
827	0.0005496	17	139	17	261
828	0.0004702	0	125	14	250
829	0.0004875	2	137	14	272
830	0.000507	4	138	16	272
831	0.0004834	14	135	14	256
832	0.0004803	19	144	16	269
833	0.0004024	3	140	16	277
834	0.0003739	6	134	15	262
835	0.0004862	1	140	17	279
836	0.0004807	11	140	16	269
837	0.0003814	3	138	17	273
838	0.0004762	20	147	18	274
839	0.0004806	18	149	17	280
840	0.0004685	8	141	18	274
841	0.0004992	25	151	18	277
842	0.0003766	2	138	16	274
843	0.000478	6	140	16	274
844	0.0004825	9	138	18	267
845	0.0005078	2	139	16	276
846	0.0004635	29	153	18	277
847	0.0003581	2	129	16	256
848	0.0003665	2	133	15	264
849	0.000493	9	144	19	279
850	0.0004709	0	133	17	266
851	0.0005037	21	150	19	279
852	0.0004788	12	143	18	274
853	0.0004706	4	139	14	274
854	0.0005379	21	146	19	271
855	0.0003721	2	128	13	254
856	0.0005156	8	140	17	272
857	0.0003806	1	131	15	261
858	0.0005393	14	146	18	278
859	0.000478	15	157	17	299
860	0.0004632	7	134	18	261
861	0.0004057	6	133	14	260
862	0.0004199	3	142	17	281
863	0.0004833	18	148	17	278
864	0.0004825	3	136	16	269
865	0.0005428	11	145	18	279
866	0.0004733	10	146	16	282
867	0.0004953	10	148	19	286
868	0.000485	6	138	15	270
869	0.0004844	16	141	18	266
870	0.0005539	12	142	17	272
871	0.0004834	1	140	17	279
872	0.0004685	3	128	18	253
873	0.0004885	29	150	18	271
874	0.0004621	13	139	15	265
875	0.0004769	0	135	19	270
876	0.0004917	5	144	16	283
877	0.0004744	15	147	18	279
878	0.0003462	1	126	14	251
879	0.0004507	15	145	19	275
880	0.0005228	19	138	15	257
881	0.0004951	19	152	14	285
882	0.0004756	9	140	19	271
883	0.0004769	17	138	17	259
884	0.0003581	1	135	17	269
885	0.0004608	5	133	15	261
886	0.0004649	12	150	19	288
887	0.0005304	8	140	15	272
888	0.0004779	20	147	16	274
889	0.0004652	4	144	17	284
890	0.0004895	6	136	14	266
891	0.0004709	14	139	14	264
892	0.0003472	2	131	13	260
893	0.0004706	10	142	17	274
894	0.0003664	2	136	17	270
895	0.0004759	17	147	15	277
896	0.0004742	28	146	19	264
897	0.0003832	1	132	16	263
898	0.0004775	6	137	15	268
899	0.0004678	16	148	18	280
900	0.0004725	14	151	19	288
901	0.0004735	0	138	18	276
902	0.0004708	5	141	19	277
903	0.0004986	22	147	17	272
904	0.0005167	4	132	14	260
905	0.0004761	3	139	18	275
906	0.0004684	4	138	16	272
907	0.0004807	10	146	15	282
908	0.0005153	12	145	17	278
909	0.0004667	6	141	18	276
910	0.0004817	22	153	19	284
911	0.0003883	0	137	16	274
912	0.0005269	17	143	14	269
913	0.0004778	9	149	15	289
914	0.0004699	28	140	14	252
915	0.0003963	4	136	16	268
916	0.0004895	1	136	19	271
917	0.0005119	13	135	19	257
918	0.0003748	17	142	16	267
919	0.0004758	1	139	14	277
920	0.0004716	10	143	15	276
921	0.0003616	3	131	17	259
922	0.0004628	9	140	15	271
923	0.0004878	3	145	16	287
924	0.0003631	3	140	17	277
925	0.00037	6	142	17	278
926	0.000477	6	138	14	270
927	0.0003701	0	134	14	268
928	0.0005011	9	146	18	283
929	0.0004571	17	141	14	265
930	0.0005524	10	141	19	272
931	0.000465	3	141	16	279
932	0.0004839	40	162	18	284
933	0.0005504	29	156	17	283
934	0.0005226	7	143	16	279
935	0.0004734	10	143	15	276
936	0.0004895	5	140	15	275
937	0.000358	4	143	16	282
938	0.0004938	7	143	19	279
939	0.0005298	6	143	17	280
940	0.0005501	10	139	16	268
941	0.0005381	10	144	16	278
942	0.0004771	7	135	17	263
943	0.0005438	5	133	15	261
944	0.0005652	18	145	15	272
945	0.0004855	12	137	14	262
946	0.0005629	7	146	16	285
947	0.000475	3	139	19	275
948	0.0004662	6	138	14	270
949	0.0004647	5	142	14	279
950	0.0004852	4	130	16	256
951	0.0004989	9	134	13	259
952	0.0004823	7	137	16	267
953	0.0004751	3	137	19	271
954	0.0004793	5	142	13	279
955	0.0005092	9	141	17	273
956	0.0004605	18	139	18	260
957	0.0004819	12	135	15	258
958	0.0004592	4	141	17	278
959	0.0004809	14	143	18	272
960	0.0005305	4	134	17	264
961	0.0005224	18	141	17	264
962	0.0005172	19	143	15	267
963	0.0004748	12	140	15	268
964	0.0004917	13	146	19	279
965	0.0003839	3	131	15	259
966	0.0004761	15	144	14	273
967	0.0004903	2	138	18	274
968	0.0005718	7	136	19	265
969	0.0004718	10	147	19	284
970	0.0004701	16	133	15	250
971	0.0003879	3	139	18	275
972	0.0003611	1	139	19	277
973	0.0004036	4	142	15	280
974	0.0005518	25	158	19	291
975	0.0004616	8	140	17	272
976	0.0004917	6	132	17	258
977	0.0004752	20	145	16	270
978	0.0003654	4	135	17	266
979	0.0003747	1	124	15	247
980	0.0004546	6	130	13	254
981	0.0005051	14	150	16	286
982	0.0003511	1	136	16	271
983	0.0004743	6	148	18	290
984	0.0004711	27	152	16	277
985	0.0004877	12	144	18	276
986	0.0003609	5	137	15	269
987	0.000477	2	146	18	290
988	0.0003672	1	132	18	263
989	0.0004951	9	150	17	291
990	0.0003366	1	133	13	265
991	0.0004745	14	144	17	274
992	0.0004909	5	137	17	269
993	0.0004658	7	132	15	257
994	0.0005024	3	136	14	269
995	0.0005277	5	141	17	277
996	0.0004719	16	150	17	284
997	0.0004523	2	138	18	274
998	0.0004635	9	138	16	267
999	0.0004876	16	136	16	256
mean	0.000462222	9.165	140.116	16.359	271.067
