# Supplementary material
Source: ML conference proceedings conference paper supplement (https://openreview.net/forum?id=2rAiDBJgR_)
Supplement: supplementary_material [file DD_size-30_test.xlsx]

## Sheet: GS_MaleOpt
	time	SEq	Bal	Reg	Egal
0	0.0002773	51	332	24	613
1	0.0002457	47	323	24	599
2	0.000254	28	303	25	578
3	0.0002549	115	358	29	601
4	0.0002416	85	340	25	595
5	0.0002976	45	333	20	621
6	0.0002439	76	346	26	616
7	0.0002398	101	354	28	607
8	0.0002602	133	390	29	647
9	0.000246	85	342	27	599
10	0.0002397	12	303	27	594
11	0.0002763	59	334	24	609
12	0.0002699	95	360	28	625
13	0.0002576	100	362	29	624
14	0.0002305	95	357	27	619
15	0.0002447	28	313	26	598
16	0.0003103	118	380	29	642
17	0.0002161	101	353	28	605
18	0.0002272	124	382	29	640
19	0.0003529	107	356	26	605
20	0.0002463	67	340	26	613
21	0.0002287	105	364	29	623
22	0.0002482	71	342	29	613
23	0.0002582	84	341	25	598
24	0.0002749	62	336	29	610
25	0.0002459	27	313	22	599
26	0.00025	67	338	29	609
27	0.000223	100	351	26	602
28	0.0002492	28	308	20	588
29	0.0002791	4	305	27	606
30	0.0002562	107	361	29	615
31	0.0002541	2	293	23	584
32	0.0002505	49	326	25	603
33	0.0002616	36	324	25	612
34	0.0002549	93	371	29	649
35	0.0002903	97	350	23	603
36	0.0002721	29	303	25	577
37	0.0002392	156	399	27	642
38	0.0002432	51	330	29	609
39	0.0002543	62	342	23	622
40	0.0002503	66	331	21	596
41	0.0002792	34	311	24	588
42	0.0002543	107	373	28	639
43	0.0002611	14	295	27	576
44	0.0002335	42	330	23	618
45	0.0002553	19	300	21	581
46	0.0002327	130	386	28	642
47	0.000238	64	338	28	612
48	0.0002683	79	345	29	611
49	0.0002524	17	313	26	609
50	0.0002541	32	311	27	590
51	0.0002817	30	328	28	626
52	0.000246	26	297	22	568
53	0.0002683	10	295	26	580
54	0.000244	51	315	25	579
55	0.0002542	3	297	28	591
56	0.0002524	32	313	22	594
57	0.0003379	50	342	24	634
58	0.0002297	45	320	19	595
59	0.0002506	24	306	25	588
60	0.0002364	50	328	26	606
61	0.0002644	49	348	28	647
62	0.0002671	39	311	22	583
63	0.0002611	48	321	27	594
64	0.0002478	5	293	24	581
65	0.0002363	40	310	22	580
66	0.0002553	92	357	27	622
67	0.0002469	70	346	24	622
68	0.0002786	18	304	23	590
69	0.0002243	61	325	27	589
70	0.0002795	92	342	27	592
71	0.0002525	85	346	28	607
72	0.0002444	48	315	27	582
73	0.000261	38	329	29	620
74	0.0002561	54	342	27	630
75	0.0002558	118	371	27	624
76	0.0002494	64	335	26	606
77	0.0002506	38	314	29	590
78	0.0002545	49	319	24	589
79	0.0002329	96	352	22	608
80	0.000252	148	398	29	648
81	0.000236	101	358	28	615
82	0.0002458	25	306	27	587
83	0.0002397	104	355	27	606
84	0.0002446	22	300	20	578
85	0.0002514	89	341	26	593
86	0.0002292	115	364	29	613
87	0.0002312	86	352	28	618
88	0.0002327	93	352	26	611
89	0.0002375	33	310	24	587
90	0.0002678	24	309	23	594
91	0.0002631	12	304	25	596
92	0.0002403	75	340	24	605
93	0.0002434	43	319	24	595
94	0.0002435	58	342	26	626
95	0.0002656	77	330	23	583
96	0.000222	65	320	27	575
97	0.0002598	94	354	25	614
98	0.0002567	84	344	28	604
99	0.0002492	73	340	25	607
100	0.0002569	23	296	21	569
101	0.0002486	96	369	28	642
102	0.000252	46	316	26	586
103	0.0002738	59	330	29	601
104	0.0002328	127	370	26	613
105	0.0002503	47	323	29	599
106	0.0002626	14	307	25	600
107	0.0002275	123	368	26	613
108	0.0003054	91	353	25	615
109	0.0002283	139	379	29	619
110	0.0002419	32	294	22	556
111	0.0002695	15	309	24	603
112	0.0002452	87	348	27	609
113	0.0002657	83	338	26	593
114	0.0002591	97	367	25	637
115	0.0002416	34	311	23	588
116	0.0002452	96	374	29	652
117	0.0002429	46	326	28	606
118	0.0002326	101	362	27	623
119	0.0002211	161	406	29	651
120	0.0002519	80	340	23	600
121	0.0002447	8	292	23	576
122	0.0002461	94	340	28	586
123	0.0002422	65	330	22	595
124	0.0002567	50	334	27	618
125	0.0002527	100	364	26	628
126	0.0002356	79	337	29	595
127	0.0002458	4	297	25	590
128	0.0002427	1	287	21	573
129	0.0003287	107	367	27	627
130	0.0002678	69	343	24	617
131	0.0002729	101	370	27	639
132	0.0002325	124	377	27	630
133	0.0002414	86	340	26	594
134	0.0002325	55	324	28	593
135	0.0002695	24	306	21	588
136	0.0002702	66	338	24	610
137	0.0002358	71	344	26	617
138	0.0002585	5	301	28	597
139	0.0002644	43	310	29	577
140	0.000254	33	319	23	605
141	0.0002738	38	316	25	594
142	0.0002488	83	348	25	613
143	0.0002627	21	310	26	599
144	0.0002537	118	367	29	616
145	0.0002456	87	357	28	627
146	0.0002791	108	358	29	608
147	0.0002276	91	358	29	625
148	0.0002519	85	350	26	615
149	0.0002569	68	332	26	596
150	0.0002603	110	367	21	624
151	0.0002489	63	335	28	607
152	0.0002306	111	365	27	619
153	0.0002629	38	308	22	578
154	0.0002414	42	320	24	598
155	0.0002864	7	295	24	583
156	0.0002411	43	325	29	607
157	0.0002352	44	318	28	592
158	0.0002341	88	350	28	612
159	0.0002406	28	303	22	578
160	0.0002224	51	319	22	587
161	0.00025	83	351	25	619
162	0.0002706	12	299	25	586
163	0.0002373	100	357	28	614
164	0.000271	73	337	29	601
165	0.0002596	16	314	29	612
166	0.000222	40	305	26	570
167	0.000245	91	350	27	609
168	0.0002172	154	390	29	626
169	0.0002342	58	323	28	588
170	0.0002537	53	324	25	595
171	0.0002339	8	292	26	576
172	0.000229	95	350	26	605
173	0.0002429	55	336	29	617
174	0.0002948	56	323	21	590
175	0.0002521	112	362	29	612
176	0.0002246	102	354	26	606
177	0.0002305	93	346	25	599
178	0.0002558	55	334	25	613
179	0.0002574	18	306	21	594
180	0.0002751	90	357	28	624
181	0.0002596	69	354	27	639
182	0.0002456	30	325	24	620
183	0.0002501	23	309	29	595
184	0.0002647	85	354	26	623
185	0.0002459	15	306	25	597
186	0.0002374	135	377	28	619
187	0.0002827	79	346	26	613
188	0.0002345	125	364	26	603
189	0.0002341	59	317	26	575
190	0.0002304	101	353	28	605
191	0.0002519	43	316	25	589
192	0.0002333	96	359	27	622
193	0.0002602	121	371	26	621
194	0.0003177	63	337	26	611
195	0.0002395	49	346	29	643
196	0.0002439	37	317	24	597
197	0.000233	109	368	28	627
198	0.0002861	16	314	24	612
199	0.0002073	170	404	27	638
200	0.0002426	24	316	24	608
201	0.0002366	66	333	28	600
202	0.0002579	114	364	28	614
203	0.0002343	72	339	28	606
204	0.0002536	15	310	23	605
205	0.0002639	21	302	28	583
206	0.0002556	69	345	27	621
207	0.0002516	101	353	29	605
208	0.0002401	90	361	28	632
209	0.0002712	46	322	26	598
210	0.0002427	31	318	26	605
211	0.0002394	4	302	26	600
212	0.0002371	156	401	26	646
213	0.000231	90	339	28	588
214	0.0002962	32	317	29	602
215	0.00026	46	332	23	618
216	0.0002627	24	296	29	568
217	0.0002562	17	316	29	615
218	0.00023	36	313	23	590
219	0.0002694	87	344	26	601
220	0.0002407	75	339	22	603
221	0.0002515	86	353	29	620
222	0.0002414	35	313	27	591
223	0.0002317	78	334	23	590
224	0.0002439	103	363	25	623
225	0.000274	55	329	25	603
226	0.0002442	9	311	29	613
227	0.0002623	18	301	23	584
228	0.0002414	95	355	26	615
229	0.0002409	52	342	29	632
230	0.0002291	67	340	24	613
231	0.0002289	65	333	28	601
232	0.0002737	58	328	24	598
233	0.0002438	60	334	25	608
234	0.0002383	55	342	24	629
235	0.0003039	17	303	21	589
236	0.0002258	97	373	26	649
237	0.0002561	5	300	22	595
238	0.0002302	69	335	26	601
239	0.0002742	69	330	27	591
240	0.0002443	98	359	28	620
241	0.0002302	126	377	27	628
242	0.0002361	49	345	27	641
243	0.0002426	72	345	29	618
244	0.0002609	69	339	27	609
245	0.0002486	51	329	29	607
246	0.0002476	116	372	29	628
247	0.000263	31	320	26	609
248	0.0002325	105	350	23	595
249	0.0002343	90	344	24	598
250	0.0002369	78	334	27	590
251	0.0002526	4	293	27	582
252	0.0002297	34	309	26	584
253	0.0002427	88	338	28	588
254	0.0002518	25	303	24	581
255	0.0002305	35	315	27	595
256	0.0002411	25	306	26	587
257	0.0002937	81	349	29	617
258	0.0002609	14	296	29	578
259	0.0002529	35	321	22	607
260	0.000229	70	339	27	608
261	0.0002277	41	319	27	597
262	0.0002593	12	288	20	564
263	0.0002545	34	302	23	570
264	0.0002528	26	307	27	588
265	0.0002391	89	359	29	629
266	0.0002329	27	308	22	589
267	0.000235	91	358	25	625
268	0.0002355	52	332	26	612
269	0.000258	91	350	27	609
270	0.0002532	21	315	26	609
271	0.0002457	52	315	23	578
272	0.0002645	41	313	26	585
273	0.0002388	47	322	25	597
274	0.000238	29	304	27	579
275	0.0002863	134	386	28	638
276	0.0002438	105	363	25	621
277	0.0002701	86	359	28	632
278	0.0002477	69	336	24	603
279	0.0002607	21	303	21	585
280	0.0002852	87	344	24	601
281	0.0002391	191	429	28	667
282	0.0002445	3	291	23	579
283	0.0002316	8	294	20	580
284	0.0003196	94	359	28	624
285	0.0002544	43	336	26	629
286	0.0002168	150	391	28	632
287	0.0002458	64	339	28	614
288	0.0002626	45	310	22	575
289	0.0002626	7	302	23	597
290	0.0002324	71	337	23	603
291	0.0003396	52	328	28	604
292	0.0002414	96	359	26	622
293	0.0002633	69	330	26	591
294	0.000226	83	345	24	607
295	0.0002726	23	323	24	623
296	0.000234	79	335	21	591
297	0.0002356	18	298	24	578
298	0.0002868	41	323	25	605
299	0.0002626	93	339	29	585
300	0.0002461	95	340	25	585
301	0.0002872	43	315	22	587
302	0.0002567	64	331	29	598
303	0.0002354	106	359	27	612
304	0.000236	48	312	20	576
305	0.0002486	101	359	26	617
306	0.000256	7	303	25	599
307	0.0002478	58	326	27	594
308	0.0002412	2	298	23	594
309	0.0002397	39	307	28	575
310	0.0002265	122	373	29	624
311	0.000272	30	306	22	582
312	0.0002505	20	322	24	624
313	0.0002463	79	335	24	591
314	0.000245	58	327	24	596
315	0.0002332	47	318	26	589
316	0.0002528	37	317	23	597
317	0.0002485	139	392	27	645
318	0.0002464	61	328	29	595
319	0.0002453	9	301	24	593
320	0.0002717	48	333	28	618
321	0.0002555	29	322	23	615
322	0.0002342	55	328	29	601
323	0.0002198	81	328	24	575
324	0.0002614	87	354	25	621
325	0.0002675	34	311	22	588
326	0.0002396	31	313	25	595
327	0.0002282	97	353	28	609
328	0.0002641	13	317	28	621
329	0.0002579	57	329	27	601
330	0.0002592	72	348	25	624
331	0.0002648	65	340	29	615
332	0.000245	48	324	25	600
333	0.0002508	58	324	26	590
334	0.0002425	73	339	26	605
335	0.0003031	131	384	27	637
336	0.0002571	65	324	23	583
337	0.0002555	49	338	26	627
338	0.0002547	22	320	24	618
339	0.0002683	79	343	25	607
340	0.0002838	66	325	28	584
341	0.0002468	37	325	26	613
342	0.0002638	82	351	28	620
343	0.0002406	130	377	27	624
344	0.0002357	34	327	26	620
345	0.0002597	106	368	29	630
346	0.0002235	120	369	29	618
347	0.0002297	130	375	28	620
348	0.0002331	123	373	28	623
349	0.0002604	79	348	28	617
350	0.0002525	121	379	29	637
351	0.0002429	96	339	24	582
352	0.0002832	72	345	24	618
353	0.0002321	105	365	28	625
354	0.0002807	47	320	21	593
355	0.0002449	69	344	25	619
356	0.0002642	61	333	23	605
357	0.0002403	23	309	23	595
358	0.0002442	70	344	29	618
359	0.0002446	66	336	26	606
360	0.0003026	51	319	26	587
361	0.000234	115	355	28	595
362	0.000238	74	335	27	596
363	0.0002332	68	328	27	588
364	0.0002385	52	320	26	588
365	0.0002463	73	346	27	619
366	0.0002416	15	293	21	571
367	0.0002456	47	328	26	609
368	0.0002225	75	324	27	573
369	0.0002587	106	366	28	626
370	0.0002349	63	331	22	599
371	0.0002694	74	338	27	602
372	0.0002366	6	294	20	582
373	0.0002846	73	348	28	623
374	0.0002425	70	332	23	594
375	0.0002281	90	341	26	592
376	0.0002572	85	346	25	607
377	0.000249	74	344	27	614
378	0.0002668	0	297	28	594
379	0.0002371	100	362	26	624
380	0.000221	191	431	29	671
381	0.0002832	44	311	24	578
382	0.0002297	79	348	28	617
383	0.0002761	128	385	29	642
384	0.0002451	89	351	29	613
385	0.0002418	64	321	24	578
386	0.0002554	13	295	21	577
387	0.0002438	126	377	29	628
388	0.0002449	56	322	23	588
389	0.0002385	83	349	27	615
390	0.0002692	7	306	22	605
391	0.0002381	70	334	27	598
392	0.000307	30	319	27	608
393	0.0002545	47	326	24	605
394	0.0002449	14	315	27	616
395	0.0002349	31	299	25	567
396	0.0002576	92	346	24	600
397	0.0002377	91	353	28	615
398	0.0002631	14	310	26	606
399	0.0002857	39	318	25	597
400	0.0002415	146	381	29	616
401	0.0002901	53	323	28	593
402	0.0002419	45	329	29	613
403	0.000262	19	326	28	633
404	0.0002455	96	361	27	626
405	0.0002412	43	306	29	569
406	0.0002622	127	380	28	633
407	0.000237	97	353	28	609
408	0.0002761	19	317	29	615
409	0.0002527	120	371	27	622
410	0.0002467	100	362	29	624
411	0.0003172	85	363	29	641
412	0.000231	146	391	29	636
413	0.0002377	129	378	26	627
414	0.0002331	96	366	24	636
415	0.0002454	74	330	28	586
416	0.000285	27	315	23	603
417	0.0002495	83	348	21	613
418	0.00026	53	338	25	623
419	0.0002397	83	343	28	603
420	0.0002623	9	313	26	617
421	0.0002428	76	344	28	612
422	0.000248	95	341	26	587
423	0.0002908	68	339	28	610
424	0.0002535	25	328	27	631
425	0.0002789	166	418	28	670
426	0.0002503	67	324	24	581
427	0.0002947	12	309	24	606
428	0.0002504	71	337	27	603
429	0.0002356	170	415	26	660
430	0.0002455	108	363	29	618
431	0.0002571	8	304	25	600
432	0.000255	45	338	26	631
433	0.0002764	31	316	26	601
434	0.0002325	71	348	25	625
435	0.0002625	46	334	23	622
436	0.0002579	1	300	22	599
437	0.0002707	91	349	27	607
438	0.0002434	18	300	28	582
439	0.0002429	89	351	29	613
440	0.0002489	116	381	26	646
441	0.0002994	72	341	22	610
442	0.0003281	41	325	26	609
443	0.0002482	84	335	29	586
444	0.000243	31	306	27	581
445	0.0002759	70	331	25	592
446	0.0002415	155	408	28	661
447	0.0002272	97	361	29	625
448	0.0002375	80	344	25	608
449	0.0002316	105	365	28	625
450	0.0002552	59	331	28	603
451	0.0002374	67	322	28	577
452	0.0002672	40	325	25	610
453	0.0002673	20	317	27	614
454	0.0002432	49	321	22	593
455	0.0002892	37	325	29	613
456	0.0002647	48	316	28	584
457	0.0002546	81	353	29	625
458	0.0002753	99	357	26	615
459	0.0002333	42	317	26	592
460	0.0002598	46	326	27	606
461	0.0003593	39	313	29	587
462	0.0002498	7	295	22	583
463	0.0002676	44	316	22	588
464	0.0002249	135	382	27	629
465	0.0002261	89	340	25	591
466	0.0002411	104	364	29	624
467	0.0002693	91	335	23	579
468	0.0002977	94	355	24	616
469	0.0002451	19	290	22	561
470	0.0002431	69	338	27	607
471	0.0002412	74	337	23	600
472	0.0003247	5	287	25	569
473	0.0002728	37	322	28	607
474	0.0002408	93	352	24	611
475	0.0002425	34	301	22	568
476	0.000272	15	300	23	585
477	0.0002474	70	333	28	596
478	0.0003981	16	308	26	600
479	0.0002617	5	304	25	603
480	0.0002795	69	331	19	593
481	0.0002382	61	331	29	601
482	0.000283	45	326	28	607
483	0.0002852	149	397	28	645
484	0.0002546	70	323	26	576
485	0.000294	68	337	24	606
486	0.000228	74	337	28	600
487	0.0002777	86	350	24	614
488	0.0002439	16	311	26	606
489	0.0002638	10	306	26	602
490	0.0003168	40	325	25	610
491	0.0002488	82	339	26	596
492	0.0002432	68	342	29	616
493	0.0002494	95	359	27	623
494	0.0003	110	361	27	612
495	0.0002456	76	323	24	570
496	0.0002599	68	339	27	610
497	0.000275	94	366	28	638
498	0.0002558	59	331	27	603
499	0.0002479	13	303	21	593
500	0.0002508	84	349	29	614
501	0.000279	60	332	23	604
502	0.0002552	88	349	25	610
503	0.0002767	3	300	24	597
504	0.0002418	76	344	25	612
505	0.0002762	102	359	29	616
506	0.0002303	120	376	29	632
507	0.000297	1	289	25	577
508	0.0002456	103	375	28	647
509	0.000244	54	337	29	620
510	0.0002479	67	337	29	607
511	0.0002203	123	374	28	625
512	0.000235	79	336	27	593
513	0.0002399	1	292	23	583
514	0.0002469	104	367	27	630
515	0.0003049	54	314	28	574
516	0.0002584	4	287	24	570
517	0.0002732	35	315	23	595
518	0.000258	71	341	28	611
519	0.0002463	45	312	29	579
520	0.0002331	114	369	25	624
521	0.0002467	102	368	28	634
522	0.0003034	22	308	28	594
523	0.0002464	133	385	27	637
524	0.0002614	63	345	28	627
525	0.0002441	45	317	29	589
526	0.0003013	22	306	24	590
527	0.0002637	54	335	25	616
528	0.0002631	68	327	26	586
529	0.0002383	101	348	28	595
530	0.0002522	83	347	25	611
531	0.0002536	77	342	26	607
532	0.0003097	17	297	24	577
533	0.0002578	1	301	26	601
534	0.0002755	62	329	25	596
535	0.0002442	2	296	22	590
536	0.0002435	74	338	29	602
537	0.0002694	10	302	25	594
538	0.000242	102	362	29	622
539	0.0003033	92	356	26	620
540	0.0002961	25	311	26	597
541	0.0003404	77	335	26	593
542	0.0002931	142	394	28	646
543	0.0002396	82	349	25	616
544	0.0002609	17	308	24	599
545	0.0002533	88	358	27	628
546	0.0002548	44	318	26	592
547	0.00034	13	305	27	597
548	0.0002469	114	366	29	618
549	0.0002384	76	338	26	600
550	0.000246	27	318	28	609
551	0.0003222	141	385	27	629
552	0.0002843	7	296	23	585
553	0.0002468	107	359	27	611
554	0.0002847	15	313	25	611
555	0.000246	104	361	25	618
556	0.000247	87	348	25	609
557	0.0002473	66	339	24	612
558	0.0002439	24	308	26	592
559	0.0002372	65	339	26	613
560	0.0002254	96	363	28	630
561	0.0003341	62	346	28	630
562	0.0002292	56	323	26	590
563	0.0002136	113	371	28	629
564	0.000231	80	352	29	624
565	0.0002622	18	317	23	616
566	0.0002448	88	351	29	614
567	0.0002795	7	292	22	577
568	0.0002502	56	339	27	622
569	0.0002627	20	320	25	620
570	0.0002442	111	364	29	617
571	0.0002531	41	319	20	597
572	0.0002595	13	311	27	609
573	0.0002454	148	393	28	638
574	0.0002398	82	345	28	608
575	0.0002437	62	325	28	588
576	0.0002593	9	310	24	611
577	0.0002728	26	307	29	588
578	0.0002626	85	353	29	621
579	0.0002485	125	367	29	609
580	0.0002639	88	358	27	628
581	0.0002671	78	348	24	618
582	0.0002547	43	323	27	603
583	0.000253	17	313	29	609
584	0.0002934	1	312	24	623
585	0.0002402	41	329	24	617
586	0.0002795	71	343	26	615
587	0.0002651	89	354	29	619
588	0.0002529	4	299	23	594
589	0.0002223	106	354	26	602
590	0.0002588	100	352	29	604
591	0.00024	66	334	29	602
592	0.000265	83	350	26	617
593	0.0002473	52	326	29	600
594	0.0002747	41	319	27	597
595	0.0003187	3	295	22	587
596	0.0002423	88	344	25	600
597	0.0002808	173	422	27	671
598	0.0002916	51	327	28	603
599	0.0002538	66	327	25	588
600	0.0002258	41	314	29	587
601	0.0002726	134	386	27	638
602	0.0002688	92	350	26	608
603	0.0002461	3	303	26	603
604	0.0002409	87	349	27	611
605	0.000241	101	364	27	627
606	0.0002749	67	335	26	603
607	0.0002285	90	348	28	606
608	0.0002657	64	325	27	586
609	0.0002431	52	319	22	586
610	0.000233	100	358	29	616
611	0.0002571	79	350	28	621
612	0.0003484	70	341	28	612
613	0.0002707	21	333	25	645
614	0.0003138	67	337	26	607
615	0.0002422	99	355	26	611
616	0.0002358	40	322	25	604
617	0.0002389	9	299	21	589
618	0.0002414	61	343	23	625
619	0.0002314	66	339	27	612
620	0.0002622	105	369	26	633
621	0.0002666	78	349	28	620
622	0.0002237	131	394	29	657
623	0.0002951	18	301	21	584
624	0.0002326	31	300	26	569
625	0.0002158	128	368	28	608
626	0.0002336	67	336	24	605
627	0.0002405	86	346	26	606
628	0.0002442	80	349	26	618
629	0.0002646	12	299	24	586
630	0.0002354	36	318	26	600
631	0.0002538	2	293	26	584
632	0.0002586	121	384	27	647
633	0.0002932	3	294	22	585
634	0.0002619	120	366	29	612
635	0.0002583	87	344	27	601
636	0.0002363	33	310	28	587
637	0.0002285	66	321	28	576
638	0.0002295	66	329	26	592
639	0.0002586	76	342	24	608
640	0.0002395	22	303	23	584
641	0.000255	111	359	28	607
642	0.0002305	137	386	29	635
643	0.0002284	81	345	28	609
644	0.0002505	48	319	27	590
645	0.0002616	55	335	22	615
646	0.0002841	74	334	23	594
647	0.0002324	67	325	27	583
648	0.0002553	24	304	24	584
649	0.0002454	139	390	29	641
650	0.0002419	50	322	27	594
651	0.0002433	71	335	24	599
652	0.0002523	87	345	29	603
653	0.0002313	102	364	24	626
654	0.0002271	48	325	25	602
655	0.0002337	74	348	27	622
656	0.0002881	78	350	23	622
657	0.0002391	46	329	24	612
658	0.0002279	63	341	27	619
659	0.0002309	131	377	28	623
660	0.0002574	57	345	28	633
661	0.0002529	112	368	29	624
662	0.0002304	126	383	28	640
663	0.0002832	68	343	28	618
664	0.0002317	43	322	27	601
665	0.0002461	51	320	23	589
666	0.0002626	47	313	25	579
667	0.0002504	52	302	28	552
668	0.0002516	37	326	25	615
669	0.0002227	16	296	25	576
670	0.0002454	100	354	26	608
671	0.0002365	110	368	28	626
672	0.0002606	51	337	26	623
673	0.0002868	86	347	23	608
674	0.0002373	38	316	23	594
675	0.0002293	124	386	29	648
676	0.0002857	80	340	24	600
677	0.0002556	62	333	26	604
678	0.0002552	31	319	28	607
679	0.0002462	24	301	23	578
680	0.0002612	65	341	27	617
681	0.0002606	76	329	29	582
682	0.0002486	105	368	27	631
683	0.0002472	8	303	27	598
684	0.0002356	75	337	26	599
685	0.0002658	57	323	24	589
686	0.0002578	41	322	28	603
687	0.0002354	4	297	24	590
688	0.0002288	49	312	23	575
689	0.0002565	55	330	21	605
690	0.0002548	44	324	27	604
691	0.0002402	52	340	25	628
692	0.0003475	82	358	29	634
693	0.000265	91	365	24	639
694	0.0002594	15	316	24	617
695	0.0002965	45	333	21	621
696	0.0002679	99	356	26	613
697	0.0002357	61	336	27	611
698	0.0002611	84	341	24	598
699	0.0002538	103	360	27	617
700	0.0002789	36	308	22	580
701	0.0002396	81	340	26	599
702	0.0002619	40	338	28	636
703	0.0003303	63	339	25	615
704	0.0002598	103	364	28	625
705	0.0002331	62	338	25	614
706	0.0002591	5	295	24	585
707	0.0003211	26	307	26	588
708	0.0002727	4	307	24	610
709	0.0002615	47	319	23	591
710	0.0002491	50	325	23	600
711	0.0002608	169	405	29	641
712	0.0003128	93	355	29	617
713	0.0002372	108	360	28	612
714	0.0002392	48	321	26	594
715	0.0002371	27	308	23	589
716	0.000236	72	329	28	586
717	0.0002755	63	333	25	603
718	0.0002456	0	314	29	628
719	0.0002267	157	408	27	659
720	0.000256	29	314	22	599
721	0.0002234	60	319	24	578
722	0.0002575	11	309	24	607
723	0.0003022	71	341	29	611
724	0.0002964	2	299	22	596
725	0.000245	38	308	28	578
726	0.0002295	55	332	22	609
727	0.0002451	6	296	22	586
728	0.0002413	53	321	20	589
729	0.0002394	35	309	29	583
730	0.0002684	16	306	23	596
731	0.0002291	115	369	24	623
732	0.0002705	10	297	21	584
733	0.0002622	50	321	25	592
734	0.0002623	86	344	28	602
735	0.0002169	148	391	28	634
736	0.0002422	143	397	29	651
737	0.000225	59	329	29	599
738	0.0002791	94	346	25	598
739	0.0002531	75	342	24	609
740	0.0002641	57	320	25	583
741	0.0002739	71	331	27	591
742	0.0002467	65	349	28	633
743	0.0002525	30	322	29	614
744	0.0002214	92	339	23	586
745	0.0002294	95	351	26	607
746	0.0002375	64	340	25	616
747	0.0002694	27	309	28	591
748	0.000239	94	358	24	622
749	0.0002906	81	345	23	609
750	0.0002799	36	320	24	604
751	0.000254	107	371	24	635
752	0.0003168	28	294	22	560
753	0.0002556	26	299	23	572
754	0.0002585	58	332	25	606
755	0.0002518	8	302	26	596
756	0.0002525	5	287	29	569
757	0.0002584	98	362	28	626
758	0.0002536	108	368	23	628
759	0.0002355	77	344	23	611
760	0.0002557	17	306	24	595
761	0.0002459	103	350	29	597
762	0.0002626	47	325	24	603
763	0.0002289	74	348	26	622
764	0.0002293	79	358	26	637
765	0.0002142	115	359	28	603
766	0.0002997	54	331	26	608
767	0.0002756	69	328	21	587
768	0.0002398	29	314	25	599
769	0.0002845	3	287	23	571
770	0.0002366	49	316	27	583
771	0.0002248	98	352	28	606
772	0.0002438	36	317	25	598
773	0.0002301	81	346	29	611
774	0.0002464	115	363	25	611
775	0.0002777	21	304	28	587
776	0.0002652	73	328	28	583
777	0.0002607	20	302	29	584
778	0.0002308	112	364	27	616
779	0.0002325	79	335	29	591
780	0.0002401	44	325	23	606
781	0.0002261	72	342	25	612
782	0.0002646	45	319	24	593
783	0.000284	52	331	27	610
784	0.0002533	75	328	27	581
785	0.0002835	29	319	29	609
786	0.0002354	64	342	29	620
787	0.0002688	41	308	22	575
788	0.0002364	49	324	24	599
789	0.000232	68	319	28	570
790	0.0002362	63	328	29	593
791	0.0002487	77	329	26	581
792	0.0002787	28	320	25	612
793	0.0002503	127	384	28	641
794	0.0002352	3	295	26	587
795	0.0002429	53	320	25	587
796	0.0002581	22	313	28	604
797	0.0002464	6	315	24	624
798	0.0002453	58	327	29	596
799	0.0002592	26	314	22	602
800	0.0002808	28	307	25	586
801	0.0002466	132	379	27	626
802	0.0002664	92	359	25	626
803	0.000265	44	324	27	604
804	0.0002533	39	322	21	605
805	0.0002509	32	324	27	616
806	0.0002443	100	370	29	640
807	0.00025	84	350	27	616
808	0.0002695	101	355	26	609
809	0.0002407	55	329	27	603
810	0.000272	40	327	29	614
811	0.0002184	125	373	26	621
812	0.0002248	131	382	29	633
813	0.0002463	32	308	28	584
814	0.000231	62	339	26	616
815	0.0002621	54	344	29	634
816	0.0002622	58	323	20	588
817	0.0002437	105	359	24	613
818	0.0002726	36	313	27	590
819	0.0002383	30	303	22	576
820	0.0002352	36	308	24	580
821	0.0002324	110	360	27	610
822	0.0002668	65	341	26	617
823	0.0002669	56	344	28	632
824	0.0002632	29	320	25	611
825	0.0002446	83	338	23	593
826	0.0002548	4	292	24	580
827	0.0002775	29	308	24	587
828	0.0002437	80	345	23	610
829	0.0002587	4	307	28	610
830	0.0002612	23	321	26	619
831	0.0002675	16	318	22	620
832	0.000242	31	301	29	571
833	0.0002463	13	309	28	605
834	0.0002588	39	311	24	583
835	0.0002696	42	322	23	602
836	0.000272	54	339	26	624
837	0.0002445	123	375	29	627
838	0.0002379	32	303	27	574
839	0.0002673	71	334	26	597
840	0.0002651	54	332	29	610
841	0.0002329	36	317	25	598
842	0.0002607	13	309	25	605
843	0.0002589	16	290	24	564
844	0.0002221	79	339	27	599
845	0.0002488	16	306	25	596
846	0.0002228	137	381	28	625
847	0.0002451	56	325	29	594
848	0.0002323	36	314	23	592
849	0.0002326	67	329	28	591
850	0.0002417	13	286	19	559
851	0.0002694	25	318	26	611
852	0.0002477	51	322	24	593
853	0.0002572	142	387	29	632
854	0.0002837	40	317	22	594
855	0.0002639	41	318	20	595
856	0.0002739	81	339	26	597
857	0.000246	45	320	24	595
858	0.0002896	90	355	28	620
859	0.0002344	85	345	27	605
860	0.0002292	98	345	28	592
861	0.0002442	1	300	19	599
862	0.0002543	52	315	24	578
863	0.0002655	42	320	25	598
864	0.0002544	81	355	28	629
865	0.0002685	108	379	29	650
866	0.0002503	95	357	29	619
867	0.0002374	55	333	29	611
868	0.0002972	27	313	25	599
869	0.000245	114	377	27	640
870	0.0002576	26	315	26	604
871	0.0002703	62	313	27	564
872	0.0002444	24	317	26	610
873	0.0002845	14	317	27	620
874	0.0002368	16	298	20	580
875	0.0002612	89	359	28	629
876	0.000224	107	363	26	619
877	0.0002607	73	340	24	607
878	0.0002215	104	352	28	600
879	0.0002525	157	408	27	659
880	0.0002874	86	358	28	630
881	0.0002839	50	322	28	594
882	0.0002796	173	419	29	665
883	0.0002506	91	347	29	603
884	0.0002357	36	332	24	628
885	0.0002877	33	310	22	587
886	0.0002268	74	336	27	598
887	0.0002698	127	387	24	647
888	0.0002298	26	312	25	598
889	0.0002487	11	290	26	569
890	0.0002945	28	318	22	608
891	0.0002516	5	294	27	583
892	0.0002843	55	336	26	617
893	0.000254	36	330	28	624
894	0.0002524	8	312	23	616
895	0.0002617	37	317	25	597
896	0.0002613	43	318	23	593
897	0.0002982	36	310	28	584
898	0.0002387	79	344	28	609
899	0.0002599	33	317	28	601
900	0.0002484	68	338	29	608
901	0.0002325	66	347	29	628
902	0.0002339	60	338	22	616
903	0.0002502	30	319	21	608
904	0.000259	26	317	27	608
905	0.000253	39	323	23	607
906	0.000285	13	301	26	589
907	0.0002419	45	313	26	581
908	0.0002343	10	288	24	566
909	0.0002493	19	316	27	613
910	0.0002269	122	372	29	622
911	0.0002592	17	308	25	599
912	0.0002317	59	335	25	611
913	0.000249	63	345	25	627
914	0.0002375	65	335	25	605
915	0.0002512	119	388	28	657
916	0.0002494	74	331	28	588
917	0.0002593	36	310	27	584
918	0.0002666	14	294	26	574
919	0.0002292	109	364	28	619
920	0.0002489	111	353	26	595
921	0.0002846	97	355	26	613
922	0.000274	26	297	22	568
923	0.0002291	144	394	29	644
924	0.0002726	84	342	27	600
925	0.0002375	115	376	27	637
926	0.0002463	20	306	22	592
927	0.000248	49	323	23	597
928	0.0002386	83	351	28	619
929	0.0002526	4	321	27	638
930	0.0002495	49	313	25	577
931	0.000231	65	329	23	593
932	0.000239	63	336	25	609
933	0.0002704	59	324	24	589
934	0.0002383	41	313	24	585
935	0.0002368	62	331	25	600
936	0.0002375	54	326	29	598
937	0.0002871	10	313	23	616
938	0.000241	86	354	28	622
939	0.0002574	92	344	26	596
940	0.0002436	33	312	27	591
941	0.0002481	50	327	26	604
942	0.0002518	95	362	28	629
943	0.0002571	75	343	29	611
944	0.0002223	73	335	25	597
945	0.000234	89	355	24	621
946	0.0002426	76	353	24	630
947	0.0002561	35	307	29	579
948	0.0002372	28	305	27	582
949	0.0002526	30	319	22	608
950	0.0002866	58	327	27	596
951	0.0002577	7	319	27	631
952	0.0002392	62	337	27	612
953	0.0002491	32	324	24	616
954	0.0002567	60	344	25	628
955	0.0002491	33	317	24	601
956	0.000244	30	314	24	598
957	0.0002516	62	329	25	596
958	0.0002706	74	343	28	612
959	0.0002421	98	360	28	622
960	0.0002371	85	340	27	595
961	0.0002943	32	317	28	602
962	0.000266	109	373	28	637
963	0.0002393	96	351	27	606
964	0.0002401	65	344	28	623
965	0.0002435	67	324	28	581
966	0.0002626	105	369	27	633
967	0.0002599	76	345	29	614
968	0.0002612	108	365	28	622
969	0.0002581	44	321	28	598
970	0.0002743	52	331	29	610
971	0.0002423	76	344	28	612
972	0.0002574	78	343	26	608
973	0.0002391	125	363	28	601
974	0.0002369	92	350	26	608
975	0.0002453	113	361	27	609
976	0.0002554	68	325	20	582
977	0.0002347	108	376	27	644
978	0.0002618	3	293	20	583
979	0.0002689	54	335	29	616
980	0.0002379	44	325	24	606
981	0.0002666	71	331	26	591
982	0.0002219	162	399	29	636
983	0.000245	80	351	28	622
984	0.0002718	75	349	26	623
985	0.0002481	58	328	29	598
986	0.000234	71	337	24	603
987	0.0002443	8	307	26	606
988	0.0002341	24	310	27	596
989	0.0002526	70	333	28	596
990	0.0002614	92	366	27	640
991	0.0002512	128	381	27	634
992	0.0002655	56	332	28	608
993	0.0003771	46	327	28	608
994	0.0002831	45	322	26	599
995	0.0002687	116	371	29	626
996	0.0002664	49	309	22	569
997	0.0002583	70	336	28	602
998	0.0002414	63	342	25	621
999	0.0002661	23	310	27	597
mean	0.00025417	63.856	334.931	25.971	606.006

## Sheet: GS_FemaleOpt
	time	SEq	Bal	Reg	Egal
0	0.0002329	97	365	26	633
1	0.0002365	25	327	29	629
2	0.0002319	41	320	29	599
3	0.0002311	6	293	24	580
4	0.0002353	32	320	28	608
5	0.0002457	111	384	29	657
6	0.000235	44	317	23	590
7	0.0002285	84	363	27	642
8	0.0002223	58	335	25	612
9	0.0002208	97	354	27	611
10	0.0002269	49	324	27	599
11	0.0002304	35	320	27	605
12	0.0002372	99	364	29	629
13	0.0002328	53	333	29	613
14	0.0002454	12	303	19	594
15	0.000237	16	308	26	600
16	0.0002237	70	341	29	612
17	0.0002249	62	327	26	592
18	0.0002188	89	356	28	623
19	0.0002159	87	344	25	601
20	0.0002521	12	316	23	620
21	0.0002771	54	328	25	602
22	0.0002142	63	323	22	583
23	0.0002302	28	312	27	596
24	0.0002237	89	342	26	595
25	0.0002621	104	362	23	620
26	0.0003819	10	297	25	584
27	0.0002254	84	346	28	608
28	0.0002214	102	360	27	618
29	0.0002765	4	305	27	606
30	0.0002363	117	369	29	621
31	0.0002274	80	332	25	584
32	0.0002297	90	351	27	612
33	0.0002454	46	319	21	592
34	0.000229	123	385	27	647
35	0.0002237	59	330	24	601
36	0.0002506	58	326	29	594
37	0.0002277	71	335	24	599
38	0.0002405	107	363	28	619
39	0.0002329	39	320	23	601
40	0.0002282	64	332	27	600
41	0.0002132	107	357	29	607
42	0.0002257	104	362	26	620
43	0.0002635	49	314	26	579
44	0.0002143	75	349	28	623
45	0.0002262	66	328	28	590
46	0.0002409	27	312	24	597
47	0.0002417	44	328	25	612
48	0.0002277	42	320	28	598
49	0.0002348	40	326	29	612
50	0.0002537	17	308	27	599
51	0.0002316	72	345	29	618
52	0.0002207	23	299	26	575
53	0.0002242	67	329	28	591
54	0.0002187	32	304	25	576
55	0.000232	24	310	28	596
56	0.0002143	86	338	25	590
57	0.000237	19	318	27	617
58	0.0002372	102	355	24	608
59	0.0002339	9	296	21	583
60	0.0002363	106	361	27	616
61	0.0002235	42	334	23	626
62	0.0002506	36	306	23	576
63	0.0002179	64	328	24	592
64	0.0002146	63	322	23	581
65	0.0002425	105	361	26	617
66	0.0002329	33	312	26	591
67	0.0002216	144	395	27	646
68	0.0002389	86	353	27	620
69	0.000235	25	298	27	571
70	0.0002369	42	322	24	602
71	0.000236	38	316	23	594
72	0.0002355	54	330	29	606
73	0.0002333	50	325	28	600
74	0.0002269	70	350	27	630
75	0.0002208	118	371	28	624
76	0.0002298	65	343	28	621
77	0.0002338	96	340	26	584
78	0.000226	45	313	21	581
79	0.0002363	23	317	26	611
80	0.0002271	97	355	26	613
81	0.0002365	43	329	26	615
82	0.0002313	73	326	29	579
83	0.0002212	86	347	29	608
84	0.0002452	65	330	24	595
85	0.0002596	126	383	28	640
86	0.0002416	33	319	22	605
87	0.0002121	103	357	27	611
88	0.000224	45	322	21	599
89	0.000219	56	315	29	574
90	0.0002391	69	345	27	621
91	0.0002296	20	308	25	596
92	0.0002238	92	348	28	604
93	0.0002346	33	321	26	609
94	0.0002439	89	352	29	615
95	0.0002259	20	306	21	592
96	0.000217	57	313	20	569
97	0.0002309	70	348	28	626
98	0.0002272	73	328	28	583
99	0.0002222	87	343	26	599
100	0.0002281	22	300	22	578
101	0.0002383	38	328	25	618
102	0.0002225	58	316	26	574
103	0.0002475	90	346	27	602
104	0.0002463	23	315	28	607
105	0.0002319	27	314	26	601
106	0.0002395	135	385	28	635
107	0.0002457	29	301	25	573
108	0.0002546	104	371	26	638
109	0.0002184	105	362	28	619
110	0.0002828	24	301	29	578
111	0.0002222	74	338	24	602
112	0.0002228	81	340	29	599
113	0.0002332	46	327	24	608
114	0.0002209	125	373	26	621
115	0.0002188	73	342	27	611
116	0.0002212	44	323	22	602
117	0.0002513	3	306	28	609
118	0.0002407	9	300	27	591
119	0.0002344	35	329	29	623
120	0.0002256	67	342	23	617
121	0.0002257	57	318	21	579
122	0.0002217	69	328	25	587
123	0.0002301	81	345	28	609
124	0.0002109	109	357	27	605
125	0.0002347	101	360	24	619
126	0.0002549	102	351	28	600
127	0.0002258	59	324	26	589
128	0.0002563	42	308	23	574
129	0.0002619	59	339	26	619
130	0.000223	77	338	29	599
131	0.0002319	39	322	24	605
132	0.0002344	58	332	28	606
133	0.0002856	67	332	27	597
134	0.0002505	30	315	28	600
135	0.0002311	62	329	23	596
136	0.0002424	46	322	24	598
137	0.0002273	87	352	29	617
138	0.0002238	103	372	28	641
139	0.000229	38	311	26	584
140	0.0002284	70	347	26	624
141	0.0002388	124	377	29	630
142	0.0002128	120	374	28	628
143	0.0002311	82	347	25	612
144	0.0002591	6	300	21	594
145	0.0002434	57	343	27	629
146	0.0002178	102	353	29	604
147	0.000284	66	343	29	620
148	0.0002305	90	347	28	604
149	0.0002325	20	304	20	588
150	0.0002473	25	322	24	619
151	0.0002194	99	358	29	617
152	0.0002258	110	358	29	606
153	0.0002392	67	334	28	601
154	0.0002285	65	338	29	611
155	0.0002212	88	349	26	610
156	0.0002295	63	343	29	623
157	0.000228	71	343	29	615
158	0.0002353	42	323	26	604
159	0.000222	64	325	24	586
160	0.0002245	85	342	26	599
161	0.0002416	81	338	23	595
162	0.0002453	47	317	25	587
163	0.0002365	64	347	25	630
164	0.0002255	16	304	26	592
165	0.0002344	130	375	28	620
166	0.0002363	79	331	27	583
167	0.0002244	65	335	29	605
168	0.0002259	56	319	26	582
169	0.0002261	9	291	27	573
170	0.0002322	75	343	25	611
171	0.0002265	39	301	22	563
172	0.0002194	59	321	20	583
173	0.0002192	19	300	20	581
174	0.0002248	49	314	28	579
175	0.0002702	87	347	28	607
176	0.0002436	38	319	26	600
177	0.0002298	65	339	28	613
178	0.0002327	32	317	25	602
179	0.0002216	107	366	29	625
180	0.0002178	122	367	28	612
181	0.000268	107	357	29	607
182	0.0002246	103	371	29	639
183	0.0002829	101	362	29	623
184	0.000225	140	388	29	636
185	0.0002393	63	330	24	597
186	0.0002172	78	343	27	608
187	0.0002338	45	327	27	609
188	0.0002286	40	325	28	610
189	0.0002397	48	319	25	590
190	0.0002167	62	328	25	594
191	0.0002351	46	313	25	580
192	0.0002164	83	340	25	597
193	0.0002455	73	340	28	607
194	0.0002288	25	305	24	585
195	0.0002533	134	389	29	644
196	0.0002324	37	332	28	627
197	0.0009174	40	323	25	606
198	0.0002242	29	322	24	615
199	0.0002336	52	336	27	620
200	0.0002233	87	353	25	619
201	0.0002543	38	320	29	602
202	0.0002247	60	323	29	586
203	0.0002176	55	323	27	591
204	0.0002374	80	352	29	624
205	0.0002267	36	308	28	580
206	0.0002251	103	371	29	639
207	0.0002233	92	356	28	620
208	0.0002227	149	396	27	643
209	0.000239	53	331	27	609
210	0.0002408	65	334	29	603
211	0.0002323	38	322	26	606
212	0.0002177	94	353	25	612
213	0.000222	44	314	29	584
214	0.0002308	19	309	29	599
215	0.0002686	51	338	27	625
216	0.0002414	24	296	29	568
217	0.0002243	98	367	29	636
218	0.0002215	89	337	25	585
219	0.0002381	28	302	29	576
220	0.0002326	14	302	21	590
221	0.0002242	77	347	28	617
222	0.0002189	144	390	27	636
223	0.0002124	87	347	29	607
224	0.0002454	14	309	25	604
225	0.0002268	137	390	28	643
226	0.0002499	9	311	29	613
227	0.0002178	7	295	23	583
228	0.0002428	94	350	26	606
229	0.0002287	113	367	26	621
230	0.0002245	62	344	24	626
231	0.0002523	29	323	29	617
232	0.0002188	95	346	28	597
233	0.0002291	7	305	25	603
234	0.0002413	76	349	28	622
235	0.0002224	30	318	27	606
236	0.00023	27	327	27	627
237	0.0002267	22	310	23	598
238	0.0002167	166	404	29	642
239	0.0002307	36	312	26	588
240	0.0002369	27	304	27	581
241	0.0002247	44	328	27	612
242	0.0002373	7	317	27	627
243	0.0002339	45	334	26	623
244	0.0002259	58	329	24	600
245	0.0002246	73	339	27	605
246	0.0002328	36	315	27	594
247	0.0002254	53	338	26	623
248	0.0002497	46	325	29	604
249	0.0002146	110	362	27	614
250	0.000233	11	294	23	577
251	0.000229	55	326	27	597
252	0.0002282	83	343	29	603
253	0.0002322	16	291	22	566
254	0.0002139	139	385	27	631
255	0.0002293	24	314	28	604
256	0.0002366	62	328	29	594
257	0.0002497	88	345	28	602
258	0.0002277	19	300	23	581
259	0.0002214	95	357	22	619
260	0.0002356	92	349	29	606
261	0.0002291	34	308	26	582
262	0.0002267	63	321	26	579
263	0.0002228	9	285	23	561
264	0.0002294	60	344	25	628
265	0.0002347	3	301	26	599
266	0.0002252	30	312	26	594
267	0.0003093	95	359	23	623
268	0.000222	48	327	25	606
269	0.0002127	64	320	20	576
270	0.0002317	65	337	28	609
271	0.0002298	51	312	24	573
272	0.0002215	86	341	26	596
273	0.0002385	21	309	25	597
274	0.0002227	58	321	27	584
275	0.000237	43	324	23	605
276	0.0002379	21	318	23	615
277	0.0002152	98	371	27	644
278	0.0002333	11	307	28	603
279	0.0002337	43	320	21	597
280	0.000217	96	343	28	590
281	0.0002246	62	331	23	600
282	0.0002266	74	333	25	592
283	0.0002198	74	338	23	602
284	0.0002754	89	355	29	621
285	0.000219	76	341	26	606
286	0.0002235	121	379	28	637
287	0.000217	92	348	23	604
288	0.000234	2	289	22	576
289	0.0002174	134	379	27	624
290	0.0002235	76	341	28	606
291	0.0002368	21	302	28	583
292	0.000234	34	315	22	596
293	0.0002329	4	287	22	570
294	0.000234	9	307	26	605
295	0.0002279	82	354	28	626
296	0.0002261	85	344	29	603
297	0.0002204	82	338	27	594
298	0.0002137	113	366	29	619
299	0.0002516	7	295	28	583
300	0.0002265	24	294	23	564
301	0.000216	122	378	29	634
302	0.0002201	55	329	27	603
303	0.0002416	97	357	29	617
304	0.0002384	58	330	25	602
305	0.000214	159	398	28	637
306	0.0002285	92	354	26	616
307	0.0002329	1	295	27	589
308	0.0002281	44	321	28	598
309	0.0002441	61	320	28	579
310	0.0002212	48	309	27	570
311	0.000214	105	355	27	605
312	0.0002373	81	350	26	619
313	0.000227	68	331	27	594
314	0.0002172	45	317	23	589
315	0.0003363	102	360	29	618
316	0.0002556	29	313	22	597
317	0.0002341	16	305	19	594
318	0.0002344	76	334	28	592
319	0.0002218	83	340	24	597
320	0.0002298	87	354	25	621
321	0.00029	80	344	27	608
322	0.0002138	104	353	29	602
323	0.0002246	59	326	24	593
324	0.0002603	68	343	24	618
325	0.0002288	75	341	25	607
326	0.0002237	73	332	29	591
327	0.0002231	53	325	20	597
328	0.0002245	107	364	29	621
329	0.000216	120	368	26	616
330	0.0002146	119	367	28	615
331	0.0002362	15	320	29	625
332	0.0002562	29	313	23	597
333	0.0002248	59	332	23	605
334	0.0002229	97	359	26	621
335	0.000227	43	330	23	617
336	0.0002238	27	301	23	575
337	0.0002245	59	335	24	611
338	0.0002209	82	338	25	594
339	0.000211	103	358	24	613
340	0.0002562	50	322	22	594
341	0.0002355	29	319	25	609
342	0.0002282	54	324	26	594
343	0.0002243	46	324	23	602
344	0.0002479	12	318	26	624
345	0.0002134	146	391	29	636
346	0.0002629	58	329	29	600
347	0.0002618	59	329	29	599
348	0.000228	82	344	26	606
349	0.000219	55	330	28	605
350	0.0003142	48	338	26	628
351	0.0002289	80	341	29	602
352	0.0002286	15	311	24	607
353	0.0002201	64	338	26	612
354	0.000248	45	316	26	587
355	0.0002349	18	309	22	600
356	0.0002403	55	333	26	611
357	0.0002489	48	330	27	612
358	0.0002328	27	309	28	591
359	0.0002296	47	322	28	597
360	0.0002276	24	308	26	592
361	0.0002234	44	308	29	572
362	0.0002273	53	321	27	589
363	0.0002244	52	315	23	578
364	0.0002117	91	343	29	595
365	0.0002515	11	303	23	595
366	0.0002311	3	289	21	575
367	0.0002202	134	387	28	640
368	0.0002307	28	298	24	568
369	0.0002363	13	311	28	609
370	0.0002203	99	360	29	621
371	0.0002228	123	369	29	615
372	0.0002276	6	297	20	588
373	0.0002862	75	346	28	617
374	0.0002317	83	347	23	611
375	0.0002371	34	309	27	584
376	0.0002384	4	303	23	602
377	0.0002385	8	310	25	612
378	0.0002278	18	307	28	596
379	0.0002295	70	342	26	614
380	0.0002248	126	380	29	634
381	0.0002133	93	348	28	603
382	0.0002303	51	325	23	599
383	0.0002456	71	341	24	611
384	0.0002264	32	317	24	602
385	0.0002538	81	353	25	625
386	0.0002218	61	316	21	571
387	0.0002316	54	325	28	596
388	0.000254	51	328	24	605
389	0.0002239	36	308	26	580
390	0.0002254	70	344	27	618
391	0.0002179	117	359	28	601
392	0.0002311	102	358	26	614
393	0.0002305	55	329	25	603
394	0.0002073	137	386	28	635
395	0.0002303	21	292	25	563
396	0.0002218	72	340	29	608
397	0.0002263	73	328	29	583
398	0.0002229	95	367	24	639
399	0.0002175	120	365	29	610
400	0.0002249	11	297	25	583
401	0.0002309	34	317	25	600
402	0.0002319	93	352	29	611
403	0.0002455	54	343	29	632
404	0.0002122	88	357	22	626
405	0.0002213	106	357	29	608
406	0.0002958	87	363	27	639
407	0.0002604	86	349	28	612
408	0.0002343	2	309	29	616
409	0.0002365	36	313	28	590
410	0.0002611	54	319	25	584
411	0.0002353	57	341	27	625
412	0.0002223	46	325	27	604
413	0.0002243	93	365	29	637
414	0.0002278	75	347	29	619
415	0.0002278	39	313	29	587
416	0.0002308	89	350	24	611
417	0.000233	28	318	23	608
418	0.0002343	56	337	23	618
419	0.0002226	56	344	29	632
420	0.0002232	74	345	26	616
421	0.0002336	18	310	25	602
422	0.0002274	73	340	25	607
423	0.0002236	49	331	24	613
424	0.000236	68	348	26	628
425	0.0002102	185	422	29	659
426	0.0002219	18	295	22	572
427	0.0002611	112	383	28	654
428	0.0003147	86	357	27	628
429	0.0002312	70	354	26	638
430	0.0002229	47	302	23	557
431	0.0002609	138	384	25	630
432	0.0002254	118	375	29	632
433	0.0002267	69	344	27	619
434	0.0002614	72	349	27	626
435	0.0002475	53	326	24	599
436	0.000224	110	362	26	614
437	0.0002264	61	333	29	605
438	0.0002438	34	311	26	588
439	0.0002739	54	325	28	596
440	0.0002561	78	350	28	622
441	0.0002251	2	312	26	622
442	0.0002159	76	341	23	606
443	0.000259	14	291	23	568
444	0.0002199	69	332	28	595
445	0.0002586	41	310	25	579
446	0.0002309	17	319	27	621
447	0.0002219	84	357	25	630
448	0.0002272	47	334	29	621
449	0.000218	68	335	23	602
450	0.0002178	79	341	28	603
451	0.0002306	26	301	20	576
452	0.0002364	11	313	25	615
453	0.0002245	108	371	28	634
454	0.0002536	5	295	27	585
455	0.0002264	128	392	27	656
456	0.0002238	21	303	24	585
457	0.0002302	42	319	24	596
458	0.0002403	23	323	26	623
459	0.0002301	28	317	25	606
460	0.0002161	56	329	25	602
461	0.000227	82	331	27	580
462	0.0002283	110	363	28	616
463	0.0002277	64	331	26	598
464	0.0002243	43	324	26	605
465	0.0002817	28	318	29	608
466	0.0002209	142	387	29	632
467	0.0002387	1	288	23	575
468	0.0002228	93	356	25	619
469	0.0002281	18	293	22	568
470	0.0002299	66	338	22	610
471	0.0002408	14	302	23	590
472	0.0002164	40	303	25	566
473	0.0002329	81	346	29	611
474	0.0002416	28	318	23	608
475	0.0002807	66	326	27	586
476	0.0002347	1	291	23	581
477	0.000214	119	366	25	613
478	0.0002174	49	325	29	601
479	0.0002579	90	349	21	608
480	0.0002965	100	359	23	618
481	0.0002664	108	355	26	602
482	0.0002406	45	328	25	611
483	0.0002189	96	358	29	620
484	0.000248	62	324	23	586
485	0.0002298	46	331	24	616
486	0.0002722	32	308	24	584
487	0.0002223	97	349	29	601
488	0.0002684	116	368	28	620
489	0.0002488	50	329	26	608
490	0.0002437	58	336	27	614
491	0.0002278	6	299	25	592
492	0.0002174	55	332	25	609
493	0.0002264	98	359	27	620
494	0.000223	22	305	27	588
495	0.0002371	34	310	28	586
496	0.0002194	114	365	29	616
497	0.0002443	27	322	25	617
498	0.0002233	62	328	25	594
499	0.0002554	105	363	24	621
500	0.00022	91	353	27	615
501	0.0002235	98	353	25	608
502	0.0002418	3	304	25	605
503	0.0002293	68	335	25	602
504	0.0002229	88	348	27	608
505	0.0002356	15	300	21	585
506	0.000231	59	334	24	609
507	0.0002324	67	325	24	583
508	0.000259	75	343	25	611
509	0.0002195	83	349	28	615
510	0.000223	86	340	26	594
511	0.000234	56	334	26	612
512	0.0002274	27	301	26	575
513	0.0002112	107	347	23	587
514	0.0002969	25	323	24	621
515	0.0002259	43	311	25	579
516	0.0002504	103	348	27	593
517	0.0002175	98	357	25	616
518	0.0002152	121	380	25	639
519	0.0002662	27	299	29	571
520	0.0002362	4	303	25	602
521	0.0002378	65	327	23	589
522	0.0002171	101	353	25	605
523	0.0002139	82	344	26	606
524	0.0002169	175	424	29	673
525	0.0002213	42	321	28	600
526	0.0002496	71	336	24	601
527	0.0002241	52	323	27	594
528	0.0002219	81	342	29	603
529	0.0002305	37	309	26	581
530	0.0002624	22	307	25	592
531	0.0002144	62	334	27	606
532	0.0002183	76	334	27	592
533	0.0002295	22	316	26	610
534	0.0002377	6	295	24	584
535	0.0002157	106	357	27	608
536	0.0002182	98	348	26	598
537	0.0002349	32	319	25	606
538	0.0002788	26	322	29	618
539	0.0002284	41	331	27	621
540	0.0002308	52	332	25	612
541	0.0002159	89	341	28	593
542	0.0002143	100	346	24	592
543	0.0002353	36	318	23	600
544	0.0002405	49	323	24	597
545	0.0002322	23	320	27	617
546	0.0002138	117	370	28	623
547	0.0002338	57	325	27	593
548	0.000228	88	353	26	618
549	0.0002332	20	305	26	590
550	0.0002344	32	315	28	598
551	0.0002368	29	322	27	615
552	0.0002217	98	358	26	618
553	0.0002261	106	364	29	622
554	0.00028	45	332	23	619
555	0.0002347	55	327	28	599
556	0.0002162	67	322	27	577
557	0.0002212	87	351	29	615
558	0.0002434	108	362	29	616
559	0.0002894	79	346	28	613
560	0.0002258	56	336	29	616
561	0.0002314	62	339	28	616
562	0.0002214	120	379	28	638
563	0.0002222	57	329	25	601
564	0.0002249	96	364	28	632
565	0.0002317	76	351	25	626
566	0.0002704	48	318	24	588
567	0.0002233	89	341	25	593
568	0.0002325	26	319	29	612
569	0.0002197	87	359	25	631
570	0.0002397	0	294	24	588
571	0.0002263	82	351	28	620
572	0.0002486	79	347	27	615
573	0.0002438	31	305	22	579
574	0.0002243	38	313	29	588
575	0.0002406	43	325	28	607
576	0.000226	80	344	28	608
577	0.0002262	78	338	29	598
578	0.0002414	66	339	27	612
579	0.0002405	90	353	27	616
580	0.0002239	67	335	26	603
581	0.0002737	99	361	23	623
582	0.0002345	26	305	27	584
583	0.0002334	2	305	29	608
584	0.0002438	150	398	25	646
585	0.0002402	75	340	28	605
586	0.0002616	128	380	29	632
587	0.0002185	115	374	27	633
588	0.0002168	78	336	26	594
589	0.0002228	54	320	22	586
590	0.0002625	54	322	29	590
591	0.0002298	67	333	28	599
592	0.0002197	107	362	28	617
593	0.0002542	70	341	28	612
594	0.0002328	23	315	26	607
595	0.0002101	94	351	29	608
596	0.000227	124	384	28	644
597	0.0002295	55	329	22	603
598	0.0002333	68	340	22	612
599	0.0002287	70	327	25	584
600	0.0002409	76	338	28	600
601	0.000225	94	367	25	640
602	0.0002453	48	326	26	604
603	0.000219	109	365	25	621
604	0.0002309	69	336	23	603
605	0.0002245	51	330	27	609
606	0.0002304	25	311	24	597
607	0.0002167	82	349	27	616
608	0.0002411	3	292	23	581
609	0.000241	31	304	22	577
610	0.0002457	85	351	24	617
611	0.0002651	117	381	28	645
612	0.0002445	13	312	26	611
613	0.0002191	101	369	25	637
614	0.000298	35	318	26	601
615	0.0002313	42	318	24	594
616	0.000234	19	320	25	621
617	0.0002304	55	327	28	599
618	0.0002278	49	330	27	611
619	0.0002295	80	353	26	626
620	0.000215	128	377	28	626
621	0.00022	92	354	27	616
622	0.0002363	119	372	27	625
623	0.0002348	29	307	25	585
624	0.0002159	83	333	24	583
625	0.0002246	96	354	27	612
626	0.0002359	13	292	22	571
627	0.0002667	83	349	26	615
628	0.0002403	68	349	27	630
629	0.0002213	36	311	24	586
630	0.0002717	9	299	23	589
631	0.0002343	54	323	29	592
632	0.0002324	44	319	21	594
633	0.0002176	74	335	28	596
634	0.0002149	116	366	27	616
635	0.0002436	78	351	27	624
636	0.0002129	62	333	28	604
637	0.0002262	72	323	21	574
638	0.0002158	81	333	22	585
639	0.0002338	152	399	29	646
640	0.0002356	75	339	25	603
641	0.0002301	17	300	28	583
642	0.0002155	96	354	29	612
643	0.0002237	70	332	26	594
644	0.0002192	109	359	26	609
645	0.0002286	68	340	27	612
646	0.0002795	57	324	25	591
647	0.0002089	104	358	29	612
648	0.000244	61	323	23	585
649	0.0002191	101	352	27	603
650	0.000218	119	371	29	623
651	0.0002164	46	319	24	592
652	0.0002089	131	367	29	603
653	0.0002126	127	381	29	635
654	0.0002312	28	311	24	594
655	0.0002385	50	330	24	610
656	0.000228	37	324	25	611
657	0.0002214	78	342	28	606
658	0.0002416	27	315	29	603
659	0.0002398	19	313	21	607
660	0.0002359	56	344	25	632
661	0.0002237	83	348	25	613
662	0.0002298	149	403	29	657
663	0.0002306	55	329	28	603
664	0.0002188	79	349	26	619
665	0.0002282	83	345	28	607
666	0.000246	5	299	25	593
667	0.0002118	73	331	29	589
668	0.0002297	36	328	23	620
669	0.0002294	33	305	24	577
670	0.0002173	126	373	29	620
671	0.0002394	92	350	29	608
672	0.0002398	67	347	28	627
673	0.0002239	124	379	29	634
674	0.0002385	5	297	23	589
675	0.0002231	47	332	24	617
676	0.0002156	103	356	26	609
677	0.0002504	6	308	26	610
678	0.000226	120	378	29	636
679	0.0002383	20	308	28	596
680	0.0002491	102	362	28	622
681	0.0002129	63	320	27	577
682	0.0003067	92	352	27	612
683	0.0002371	96	346	28	596
684	0.0002336	102	366	28	630
685	0.0002288	25	307	24	589
686	0.0002413	34	309	24	584
687	0.0002308	108	360	27	612
688	0.0002215	49	314	23	579
689	0.0002225	83	339	26	595
690	0.0002285	26	309	27	592
691	0.000236	28	310	22	592
692	0.0002408	6	313	26	620
693	0.0002359	7	307	24	607
694	0.000224	142	394	28	646
695	0.0002428	53	326	24	599
696	0.0002305	27	303	24	579
697	0.0002651	14	306	29	598
698	0.0002114	121	358	27	595
699	0.0002174	105	366	25	627
700	0.0002335	55	319	22	583
701	0.0002357	14	303	27	592
702	0.0002343	57	343	28	629
703	0.0002283	77	339	26	601
704	0.0002307	54	325	23	596
705	0.0002402	51	334	29	617
706	0.0002257	49	318	29	587
707	0.0002296	45	308	19	571
708	0.0002174	94	355	26	616
709	0.0002735	40	322	26	604
710	0.0002189	57	323	24	589
711	0.0002742	86	363	26	640
712	0.0002217	94	354	27	614
713	0.0002343	63	333	28	603
714	0.0002209	86	342	26	598
715	0.0002252	113	368	29	623
716	0.0002502	101	358	29	615
717	0.0003084	27	317	29	607
718	0.0002269	47	331	25	615
719	0.0002149	88	347	27	606
720	0.0002287	25	309	23	593
721	0.0002277	111	361	29	611
722	0.0002326	43	319	24	595
723	0.0002196	54	317	22	580
724	0.0002415	72	333	29	594
725	0.0002725	10	288	21	566
726	0.0002235	157	399	26	641
727	0.0002618	47	326	27	605
728	0.0002158	47	312	20	577
729	0.0002058	81	328	25	575
730	0.0002288	27	313	23	599
731	0.0002416	14	308	24	602
732	0.0002284	24	304	21	584
733	0.0004333	67	323	25	579
734	0.0002242	98	351	27	604
735	0.0002173	75	336	25	597
736	0.000238	17	314	23	611
737	0.000226	91	360	28	629
738	0.0002257	112	369	26	626
739	0.0002313	181	424	29	667
740	0.0002134	163	393	29	623
741	0.0002658	14	295	28	576
742	0.000212	132	383	28	634
743	0.0002461	30	322	29	614
744	0.0002324	100	359	25	618
745	0.0002222	32	308	23	584
746	0.0002187	169	419	29	669
747	0.000223	70	343	29	616
748	0.0002385	26	316	20	606
749	0.0002176	114	370	28	626
750	0.0002303	70	345	24	620
751	0.0002868	130	380	28	630
752	0.0002484	121	367	29	613
753	0.0002446	23	304	22	585
754	0.0002325	78	350	27	622
755	0.0002797	32	310	27	588
756	0.0002333	32	304	25	576
757	0.0002487	40	329	21	618
758	0.0002407	23	322	29	621
759	0.0002759	6	301	24	596
760	0.0002152	116	367	25	618
761	0.0002276	105	370	29	635
762	0.0002312	88	362	23	636
763	0.0002331	40	330	24	620
764	0.0002275	113	371	28	629
765	0.0002223	100	350	28	600
766	0.0002172	73	333	25	593
767	0.0002395	33	309	21	585
768	0.0002141	110	356	24	602
769	0.0002147	77	336	27	595
770	0.0002213	26	313	24	600
771	0.0002279	105	359	28	613
772	0.0002322	19	314	28	609
773	0.0002374	5	299	29	593
774	0.0002337	11	296	22	581
775	0.0002213	85	347	27	609
776	0.0002159	12	292	23	572
777	0.0002233	42	310	26	578
778	0.0002565	80	352	28	624
779	0.0002273	61	335	28	609
780	0.0002226	85	349	28	613
781	0.0002409	16	311	25	606
782	0.0002325	3	298	24	593
783	0.0002368	52	329	25	606
784	0.0002292	6	283	22	560
785	0.0002259	46	319	24	592
786	0.0002244	106	363	27	620
787	0.0003238	57	321	25	585
788	0.0002296	77	342	29	607
789	0.0002271	36	308	27	580
790	0.0002352	88	345	25	602
791	0.000272	0	284	22	568
792	0.0002614	41	329	26	617
793	0.000272	107	364	28	621
794	0.0002286	68	331	28	594
795	0.0002307	15	300	20	585
796	0.0002296	68	344	29	620
797	0.0002196	61	342	24	623
798	0.0002271	57	331	28	605
799	0.0002222	86	353	29	620
800	0.0002115	96	352	25	608
801	0.0002138	101	350	29	599
802	0.0002282	25	309	21	593
803	0.0002181	68	332	23	596
804	0.0002244	52	337	29	622
805	0.0002385	40	329	27	618
806	0.0002289	88	355	25	622
807	0.0002523	69	338	28	607
808	0.0002121	120	368	28	616
809	0.0002359	50	324	23	598
810	0.0003916	59	326	23	593
811	0.0002267	29	322	27	615
812	0.0002202	103	371	28	639
813	0.0003212	51	317	29	583
814	0.0002353	51	331	24	611
815	0.0002165	93	359	29	625
816	0.0002283	24	301	26	578
817	0.0002347	1	286	21	571
818	0.0002249	38	315	29	592
819	0.0002241	27	301	21	575
820	0.0002509	88	343	26	598
821	0.0002246	61	328	23	595
822	0.0002375	61	337	29	613
823	0.0002254	65	348	25	631
824	0.0002914	94	363	25	632
825	0.0002539	90	350	27	610
826	0.0002718	33	309	22	585
827	0.0002401	121	376	27	631
828	0.0002346	16	310	22	604
829	0.0002245	99	356	29	613
830	0.0002395	121	374	28	627
831	0.0002353	49	339	26	629
832	0.000218	50	308	28	566
833	0.0002308	38	317	26	596
834	0.0002286	5	296	24	587
835	0.0002232	34	320	26	606
836	0.0002215	63	333	22	603
837	0.0002212	105	358	27	611
838	0.000212	117	365	29	613
839	0.0002177	137	386	29	635
840	0.0002387	35	315	29	595
841	0.0002436	103	360	28	617
842	0.0002275	95	361	28	627
843	0.0002388	49	310	24	571
844	0.0002523	2	302	29	602
845	0.0002399	5	301	25	597
846	0.0002292	61	326	27	591
847	0.0002231	77	338	28	599
848	0.0002205	35	305	24	575
849	0.0002319	27	301	27	575
850	0.0002552	8	288	25	568
851	0.0002305	118	367	26	616
852	0.0002285	97	357	23	617
853	0.0002273	129	378	26	627
854	0.0005484	101	351	28	601
855	0.0002143	100	361	26	622
856	0.000238	40	311	26	582
857	0.0002256	48	322	24	596
858	0.0002156	81	356	29	631
859	0.0002324	1	288	21	575
860	0.0002543	46	316	22	586
861	0.0002563	27	311	19	595
862	0.0002387	17	299	24	581
863	0.0002324	53	325	27	597
864	0.0002276	55	336	28	617
865	0.0002317	67	339	22	611
866	0.0002358	26	310	26	594
867	0.0002353	5	310	29	615
868	0.0002363	40	322	29	604
869	0.0002295	88	359	28	630
870	0.000215	83	342	28	601
871	0.0002282	52	311	27	570
872	0.0002291	26	314	25	602
873	0.0002191	115	372	28	629
874	0.0002135	74	342	27	610
875	0.0002345	8	307	28	606
876	0.0002273	64	340	27	616
877	0.000233	41	323	22	605
878	0.0002141	121	371	29	621
879	0.0002497	6	330	28	654
880	0.0002265	93	355	26	617
881	0.0002274	62	328	28	594
882	0.0002202	84	359	29	634
883	0.0002345	44	314	29	584
884	0.0002176	111	374	28	637
885	0.0002208	137	382	27	627
886	0.000214	118	367	29	616
887	0.0002774	24	332	25	640
888	0.0002553	92	352	26	612
889	0.0002201	65	317	20	569
890	0.0002375	74	345	22	616
891	0.0002365	46	323	27	600
892	0.0002234	33	321	26	609
893	0.0002314	91	358	27	625
894	0.0002199	148	398	29	648
895	0.0002087	76	335	23	594
896	0.0002339	37	322	23	607
897	0.0002331	28	298	22	568
898	0.0002314	80	347	26	614
899	0.0002226	97	354	29	611
900	0.0002493	9	301	27	593
901	0.0002318	127	381	29	635
902	0.0002334	104	363	23	622
903	0.000229	95	359	25	623
904	0.0002312	65	335	28	605
905	0.000236	101	358	27	615
906	0.0002219	94	350	23	606
907	0.0002168	98	352	27	606
908	0.0002214	66	321	27	576
909	0.0002199	69	350	25	631
910	0.0002339	7	297	23	587
911	0.0002158	127	372	29	617
912	0.0002186	30	314	23	598
913	0.000239	105	374	29	643
914	0.0002339	9	304	24	599
915	0.0002234	127	388	28	649
916	0.0002336	75	326	29	577
917	0.0002676	44	321	29	598
918	0.0002148	52	321	26	590
919	0.0002421	136	393	29	650
920	0.0002229	29	298	23	567
921	0.0002351	93	351	27	609
922	0.0002271	26	296	22	566
923	0.0002174	85	346	25	607
924	0.0002217	40	315	23	590
925	0.0002325	70	343	23	616
926	0.0002501	184	420	29	656
927	0.0002257	38	317	25	596
928	0.0002272	23	312	27	601
929	0.0002243	80	359	27	638
930	0.0002247	11	295	22	579
931	0.0002279	39	317	23	595
932	0.0002161	94	359	28	624
933	0.0002279	125	376	26	627
934	0.0002258	75	339	28	603
935	0.0002346	56	339	28	622
936	0.0002142	125	374	29	623
937	0.0002294	57	338	23	619
938	0.0002288	103	369	25	635
939	0.0002163	85	354	25	623
940	0.0002527	26	312	28	598
941	0.0002305	22	313	26	604
942	0.0002602	82	338	25	594
943	0.0002352	28	321	29	614
944	0.0002685	103	349	28	595
945	0.0002335	8	304	22	600
946	0.0002249	77	342	29	607
947	0.0002179	119	357	29	595
948	0.0002185	31	307	26	583
949	0.0002703	107	369	29	631
950	0.0002126	98	350	29	602
951	0.0002179	103	360	26	617
952	0.0002267	68	335	25	602
953	0.0002177	102	359	27	616
954	0.0002205	107	362	26	617
955	0.0002509	112	368	26	624
956	0.0002279	9	303	24	597
957	0.0002334	121	368	28	615
958	0.0002156	96	346	25	596
959	0.0002152	105	361	28	617
960	0.0002821	39	311	28	583
961	0.0002399	73	341	25	609
962	0.0002235	125	372	24	619
963	0.0002169	74	339	25	604
964	0.000203	133	381	25	629
965	0.0002161	61	322	27	583
966	0.0002178	118	372	28	626
967	0.0002188	126	377	25	628
968	0.0002199	40	318	28	596
969	0.0002224	94	354	25	614
970	0.0002198	103	366	27	629
971	0.0002407	66	345	25	624
972	0.000223	18	308	23	598
973	0.0002188	49	326	28	603
974	0.0002379	57	329	25	601
975	0.0002125	79	342	28	605
976	0.0002291	17	299	20	581
977	0.0002277	70	340	24	610
978	0.0002291	63	328	23	593
979	0.0002681	43	321	22	599
980	0.0002732	40	321	25	602
981	0.0002282	62	321	23	580
982	0.000227	87	354	28	621
983	0.0002056	174	414	28	654
984	0.0002235	83	346	28	609
985	0.0002685	93	354	29	615
986	0.0002255	64	334	28	604
987	0.0002303	192	437	28	682
988	0.0002275	116	371	28	626
989	0.0002324	79	337	27	595
990	0.0002302	128	379	27	630
991	0.0002487	138	394	27	650
992	0.0002243	71	328	24	585
993	0.0002199	103	360	27	617
994	0.0002194	82	341	26	600
995	0.0002317	37	317	23	597
996	0.0002231	164	405	29	646
997	0.0002244	91	354	29	617
998	0.0002352	50	344	28	638
999	0.0002218	75	331	29	587
mean	0.000234468	65.444	335.677	26.07	605.91

## Sheet: GS_Opt
	time	SEq	Bal	Reg	Egal
0	0.0005102	51	332	24	613
1	0.0004822	25	323	24	599
2	0.0004859	28	303	25	578
3	0.000486	6	293	24	580
4	0.0004769	32	320	25	595
5	0.0005433	45	333	20	621
6	0.0004789	44	317	23	590
7	0.0004683	84	354	27	607
8	0.0004825	58	335	25	612
9	0.0004668	85	342	27	599
10	0.0004666	12	303	27	594
11	0.0005067	35	320	24	605
12	0.0005071	95	360	28	625
13	0.0004904	53	333	29	613
14	0.0004759	12	303	19	594
15	0.0004817	16	308	26	598
16	0.000534	70	341	29	612
17	0.000441	62	327	26	592
18	0.000446	89	356	28	623
19	0.0005688	87	344	25	601
20	0.0004984	12	316	23	613
21	0.0005058	54	328	25	602
22	0.0004624	63	323	22	583
23	0.0004884	28	312	25	596
24	0.0004986	62	336	26	595
25	0.000508	27	313	22	599
26	0.0006319	10	297	25	584
27	0.0004484	84	346	26	602
28	0.0004706	28	308	20	588
29	0.0005556	4	305	27	606
30	0.0004925	107	361	29	615
31	0.0004815	2	293	23	584
32	0.0004802	49	326	25	603
33	0.000507	36	319	21	592
34	0.0004839	93	371	27	647
35	0.000514	59	330	23	601
36	0.0005227	29	303	25	577
37	0.0004669	71	335	24	599
38	0.0004837	51	330	28	609
39	0.0004872	39	320	23	601
40	0.0004785	64	331	21	596
41	0.0004924	34	311	24	588
42	0.00048	104	362	26	620
43	0.0005246	14	295	26	576
44	0.0004478	42	330	23	618
45	0.0004815	19	300	21	581
46	0.0004736	27	312	24	597
47	0.0004797	44	328	25	612
48	0.000496	42	320	28	598
49	0.0004872	17	313	26	609
50	0.0005078	17	308	27	590
51	0.0005133	30	328	28	618
52	0.0004667	23	297	22	568
53	0.0004925	10	295	26	580
54	0.0004627	32	304	25	576
55	0.0004862	3	297	28	591
56	0.0004667	32	313	22	590
57	0.0005749	19	318	24	617
58	0.0004669	45	320	19	595
59	0.0004845	9	296	21	583
60	0.0004727	50	328	26	606
61	0.0004879	42	334	23	626
62	0.0005177	36	306	22	576
63	0.000479	48	321	24	592
64	0.0004624	5	293	23	581
65	0.0004788	40	310	22	580
66	0.0004882	33	312	26	591
67	0.0004685	70	346	24	622
68	0.0005175	18	304	23	590
69	0.0004593	25	298	27	571
70	0.0005164	42	322	24	592
71	0.0004885	38	316	23	594
72	0.0004799	48	315	27	582
73	0.0004943	38	325	28	600
74	0.000483	54	342	27	630
75	0.0004766	118	371	27	624
76	0.0004792	64	335	26	606
77	0.0004844	38	314	26	584
78	0.0004805	45	313	21	581
79	0.0004692	23	317	22	608
80	0.0004791	97	355	26	613
81	0.0004725	43	329	26	615
82	0.0004771	25	306	27	579
83	0.0004609	86	347	27	606
84	0.0004898	22	300	20	578
85	0.000511	89	341	26	593
86	0.0004708	33	319	22	605
87	0.0004433	86	352	27	611
88	0.0004567	45	322	21	599
89	0.0004565	33	310	24	574
90	0.0005069	24	309	23	594
91	0.0004927	12	304	25	596
92	0.0004641	75	340	24	604
93	0.000478	33	319	24	595
94	0.0004874	58	342	26	615
95	0.0004915	20	306	21	583
96	0.000439	57	313	20	569
97	0.0004907	70	348	25	614
98	0.0004839	73	328	28	583
99	0.0004714	73	340	25	599
100	0.000485	22	296	21	569
101	0.0004869	38	328	25	618
102	0.0004745	46	316	26	574
103	0.0005213	59	330	27	601
104	0.0004791	23	315	26	607
105	0.0004822	27	314	26	599
106	0.0005021	14	307	25	600
107	0.0004732	29	301	25	573
108	0.00056	91	353	25	615
109	0.0004467	105	362	28	619
110	0.0005247	24	294	22	556
111	0.0004917	15	309	24	602
112	0.000468	81	340	27	599
113	0.0004989	46	327	24	593
114	0.00048	97	367	25	621
115	0.0004604	34	311	23	588
116	0.0004664	44	323	22	602
117	0.0004942	3	306	28	606
118	0.0004733	9	300	27	591
119	0.0004555	35	329	29	623
120	0.0004775	67	340	23	600
121	0.0004704	8	292	21	576
122	0.0004678	69	328	25	586
123	0.0004723	65	330	22	595
124	0.0004676	50	334	27	605
125	0.0004874	100	360	24	619
126	0.0004905	79	337	28	595
127	0.0004716	4	297	25	589
128	0.000499	1	287	21	573
129	0.0005906	59	339	26	619
130	0.0004908	69	338	24	599
131	0.0005048	39	322	24	605
132	0.0004669	58	332	27	606
133	0.000527	67	332	26	594
134	0.000483	30	315	28	593
135	0.0005006	24	306	21	588
136	0.0005126	46	322	24	598
137	0.0004631	71	344	26	617
138	0.0004823	5	301	28	597
139	0.0004934	38	310	26	577
140	0.0004824	33	319	23	605
141	0.0005126	38	316	25	594
142	0.0004616	83	348	25	613
143	0.0004938	21	310	25	599
144	0.0005128	6	300	21	594
145	0.000489	57	343	27	627
146	0.0004969	102	353	29	604
147	0.0005116	66	343	29	620
148	0.0004824	85	347	26	604
149	0.0004894	20	304	20	588
150	0.0005076	25	322	21	619
151	0.0004683	63	335	28	607
152	0.0004564	110	358	27	606
153	0.0005021	38	308	22	578
154	0.0004699	42	320	24	598
155	0.0005076	7	295	24	583
156	0.0004706	43	325	29	607
157	0.0004632	44	318	28	592
158	0.0004694	42	323	26	604
159	0.0004626	28	303	22	578
160	0.0004469	51	319	22	587
161	0.0004916	81	338	23	595
162	0.0005159	12	299	25	586
163	0.0004738	64	347	25	614
164	0.0004965	16	304	26	592
165	0.000494	16	314	28	612
166	0.0004583	40	305	26	570
167	0.0004694	65	335	27	605
168	0.0004431	56	319	26	582
169	0.0004603	9	291	27	573
170	0.0004859	53	324	25	595
171	0.0004604	8	292	22	563
172	0.0004484	59	321	20	583
173	0.0004621	19	300	20	581
174	0.0005196	49	314	21	579
175	0.0005223	87	347	28	607
176	0.0004682	38	319	26	600
177	0.0004603	65	339	25	599
178	0.0004885	32	317	25	602
179	0.000479	18	306	21	594
180	0.0004929	90	357	28	612
181	0.0005276	69	354	27	607
182	0.0004702	30	325	24	620
183	0.000533	23	309	29	595
184	0.0004897	85	354	26	623
185	0.0004852	15	306	24	597
186	0.0004546	78	343	27	608
187	0.0005165	45	327	26	609
188	0.0004631	40	325	26	603
189	0.0004738	48	317	25	575
190	0.0004471	62	328	25	594
191	0.000487	43	313	25	580
192	0.0004497	83	340	25	597
193	0.0005057	73	340	26	607
194	0.0005465	25	305	24	585
195	0.0004928	49	346	29	643
196	0.0004763	37	317	24	597
197	0.0011504	40	323	25	606
198	0.0005103	16	314	24	612
199	0.0004409	52	336	27	620
200	0.0004659	24	316	24	608
201	0.0004909	38	320	28	600
202	0.0004826	60	323	28	586
203	0.0004519	55	323	27	591
204	0.000491	15	310	23	605
205	0.0004906	21	302	28	580
206	0.0004807	69	345	27	621
207	0.0004749	92	353	28	605
208	0.0004628	90	361	27	632
209	0.0005102	46	322	26	598
210	0.0004835	31	318	26	603
211	0.0004717	4	302	26	600
212	0.0004548	94	353	25	612
213	0.000453	44	314	28	584
214	0.000527	19	309	29	599
215	0.0005286	46	332	23	618
216	0.0005041	24	296	29	568
217	0.0004805	17	316	29	615
218	0.0004515	36	313	23	585
219	0.0005075	28	302	26	576
220	0.0004733	14	302	21	590
221	0.0004757	77	347	28	617
222	0.0004603	35	313	27	591
223	0.0004441	78	334	23	590
224	0.0004893	14	309	25	604
225	0.0005008	55	329	25	603
226	0.0004941	9	311	29	613
227	0.0004801	7	295	23	583
228	0.0004842	94	350	26	606
229	0.0004696	52	342	26	621
230	0.0004536	62	340	24	613
231	0.0004812	29	323	28	601
232	0.0004925	58	328	24	597
233	0.0004729	7	305	25	603
234	0.0004796	55	342	24	622
235	0.0005263	17	303	21	589
236	0.0004558	27	327	26	627
237	0.0004828	5	300	22	595
238	0.0004469	69	335	26	601
239	0.0005049	36	312	26	588
240	0.0004812	27	304	27	581
241	0.0004549	44	328	27	612
242	0.0004734	7	317	27	627
243	0.0004765	45	334	26	618
244	0.0004868	58	329	24	600
245	0.0004732	51	329	27	605
246	0.0004804	36	315	27	594
247	0.0004884	31	320	26	609
248	0.0004822	46	325	23	595
249	0.0004489	90	344	24	598
250	0.0004699	11	294	23	577
251	0.0004816	4	293	27	582
252	0.0004579	34	309	26	584
253	0.0004749	16	291	22	566
254	0.0004657	25	303	24	581
255	0.0004598	24	314	27	595
256	0.0004777	25	306	26	587
257	0.0005434	81	345	28	602
258	0.0004886	14	296	23	578
259	0.0004743	35	321	22	607
260	0.0004646	70	339	27	606
261	0.0004568	34	308	26	582
262	0.000486	12	288	20	564
263	0.0004773	9	285	23	561
264	0.0004822	26	307	25	588
265	0.0004738	3	301	26	599
266	0.0004581	27	308	22	589
267	0.0005443	91	358	23	623
268	0.0004575	48	327	25	606
269	0.0004707	64	320	20	576
270	0.0004849	21	315	26	609
271	0.0004755	51	312	23	573
272	0.000486	41	313	26	585
273	0.0004773	21	309	25	597
274	0.0004607	29	304	27	579
275	0.0005233	43	324	23	605
276	0.0004817	21	318	23	615
277	0.0004853	86	359	27	632
278	0.000481	11	307	24	603
279	0.0004944	21	303	21	585
280	0.0005022	87	343	24	590
281	0.0004637	62	331	23	600
282	0.0004711	3	291	23	579
283	0.0004514	8	294	20	580
284	0.000595	89	355	28	621
285	0.0004734	43	336	26	606
286	0.0004403	121	379	28	632
287	0.0004628	64	339	23	604
288	0.0004966	2	289	22	575
289	0.00048	7	302	23	597
290	0.0004559	71	337	23	603
291	0.0005764	21	302	28	583
292	0.0004754	34	315	22	596
293	0.0004962	4	287	22	570
294	0.00046	9	307	24	605
295	0.0005005	23	323	24	623
296	0.0004601	79	335	21	591
297	0.000456	18	298	24	578
298	0.0005005	41	323	25	605
299	0.0005142	7	295	28	583
300	0.0004726	24	294	23	564
301	0.0005032	43	315	22	587
302	0.0004768	55	329	27	598
303	0.000477	97	357	27	612
304	0.0004744	48	312	20	576
305	0.0004626	101	359	26	617
306	0.0004845	7	303	25	599
307	0.0004807	1	295	27	589
308	0.0004693	2	298	23	594
309	0.0004838	39	307	28	575
310	0.0004477	48	309	27	570
311	0.000486	30	306	22	582
312	0.0004878	20	322	24	619
313	0.0004733	68	331	24	591
314	0.0004622	45	317	23	589
315	0.0005695	47	318	26	589
316	0.0005084	29	313	22	597
317	0.0004826	16	305	19	594
318	0.0004808	61	328	28	592
319	0.0004671	9	301	24	593
320	0.0005015	48	333	25	618
321	0.0005455	29	322	23	608
322	0.000448	55	328	29	601
323	0.0004444	59	326	24	575
324	0.0005217	68	343	24	618
325	0.0004963	34	311	22	588
326	0.0004633	31	313	25	591
327	0.0004513	53	325	20	597
328	0.0004886	13	317	28	621
329	0.0004739	57	329	26	601
330	0.0004738	72	348	25	615
331	0.000501	15	320	29	615
332	0.0005012	29	313	23	597
333	0.0004756	58	324	23	590
334	0.0004654	73	339	26	605
335	0.0005301	43	330	23	617
336	0.0004809	27	301	23	575
337	0.00048	49	335	24	611
338	0.0004756	22	320	24	594
339	0.0004793	79	343	24	607
340	0.00054	50	322	22	584
341	0.0004823	29	319	25	609
342	0.000492	54	324	26	594
343	0.0004649	46	324	23	602
344	0.0004836	12	318	26	620
345	0.0004731	106	368	29	630
346	0.0004864	58	329	29	600
347	0.0004915	59	329	28	599
348	0.0004611	82	344	26	606
349	0.0004794	55	330	28	605
350	0.0005667	48	338	26	628
351	0.0004718	80	339	24	582
352	0.0005118	15	311	24	607
353	0.0004522	64	338	26	612
354	0.0005287	45	316	21	587
355	0.0004798	18	309	22	600
356	0.0005045	55	333	23	605
357	0.0004892	23	309	23	595
358	0.000477	27	309	28	591
359	0.0004742	47	322	26	597
360	0.0005302	24	308	26	587
361	0.0004574	44	308	28	572
362	0.0004653	53	321	27	589
363	0.0004576	52	315	23	578
364	0.0004502	52	320	26	588
365	0.0004978	11	303	23	595
366	0.0004727	3	289	21	571
367	0.0004658	47	328	26	609
368	0.0004532	28	298	24	568
369	0.000495	13	311	28	609
370	0.0004552	63	331	22	599
371	0.0004922	74	338	27	602
372	0.0004642	6	294	20	582
373	0.0005708	73	346	28	617
374	0.0004742	70	332	23	594
375	0.0004652	34	309	26	584
376	0.0004956	4	303	23	602
377	0.0004875	8	310	25	612
378	0.0004946	0	297	28	594
379	0.0004666	70	342	26	614
380	0.0004458	126	380	29	634
381	0.0004965	44	311	24	578
382	0.00046	51	325	23	599
383	0.0005217	71	341	24	611
384	0.0004715	32	317	24	602
385	0.0004956	64	321	24	578
386	0.0004772	13	295	21	571
387	0.0004754	54	325	28	596
388	0.0004989	51	322	23	588
389	0.0004624	36	308	26	580
390	0.0004946	7	306	22	605
391	0.000456	70	334	27	598
392	0.0005381	30	319	26	608
393	0.000485	47	326	24	603
394	0.0004522	14	315	27	616
395	0.0004652	21	292	25	563
396	0.0004794	72	340	24	600
397	0.000464	73	328	28	583
398	0.000486	14	310	24	606
399	0.0005032	39	318	25	597
400	0.0004664	11	297	25	583
401	0.000521	34	317	25	593
402	0.0004738	45	329	29	611
403	0.0005075	19	326	28	632
404	0.0004577	88	357	22	626
405	0.0004625	43	306	29	569
406	0.000558	87	363	27	633
407	0.0004974	86	349	28	609
408	0.0005104	2	309	29	615
409	0.0004892	36	313	27	590
410	0.0005078	54	319	25	584
411	0.0005525	57	341	27	625
412	0.0004533	46	325	27	604
413	0.000462	93	365	26	627
414	0.0004609	75	347	24	619
415	0.0004732	39	313	28	586
416	0.0005158	27	315	23	603
417	0.0004825	28	318	21	608
418	0.0004943	53	337	23	618
419	0.0004623	56	343	28	603
420	0.0004855	9	313	26	616
421	0.0004764	18	310	25	602
422	0.0004754	73	340	25	587
423	0.0005144	49	331	24	610
424	0.0004895	25	328	26	628
425	0.0004891	166	418	28	659
426	0.0004722	18	295	22	572
427	0.0005558	12	309	24	606
428	0.0005651	71	337	27	603
429	0.0004668	70	354	26	638
430	0.0004684	47	302	23	557
431	0.000518	8	304	25	600
432	0.0004804	45	338	26	631
433	0.0005031	31	316	26	601
434	0.0004939	71	348	25	625
435	0.00051	46	326	23	599
436	0.0004819	1	300	22	599
437	0.0004971	61	333	27	605
438	0.0004872	18	300	26	582
439	0.0005168	54	325	28	596
440	0.000505	78	350	26	622
441	0.0005245	2	312	22	610
442	0.000544	41	325	23	606
443	0.0005072	14	291	23	568
444	0.0004629	31	306	27	581
445	0.0005345	41	310	25	579
446	0.0004724	17	319	27	621
447	0.0004491	84	357	25	625
448	0.0004647	47	334	25	608
449	0.0004496	68	335	23	602
450	0.000473	59	331	28	603
451	0.000468	26	301	20	576
452	0.0005036	11	313	25	610
453	0.0004918	20	317	27	614
454	0.0004968	5	295	22	585
455	0.0005156	37	325	27	613
456	0.0004885	21	303	24	584
457	0.0004848	42	319	24	596
458	0.0005156	23	323	26	615
459	0.0004634	28	317	25	592
460	0.0004759	46	326	25	602
461	0.0005863	39	313	27	580
462	0.0004781	7	295	22	583
463	0.0004953	44	316	22	588
464	0.0004492	43	324	26	605
465	0.0005078	28	318	25	591
466	0.000462	104	364	29	624
467	0.000508	1	288	23	575
468	0.0005205	93	355	24	616
469	0.0004732	18	290	22	561
470	0.000473	66	338	22	607
471	0.000482	14	302	23	590
472	0.0005411	5	287	25	566
473	0.0005057	37	322	28	607
474	0.0004824	28	318	23	608
475	0.0005232	34	301	22	568
476	0.0005067	1	291	23	581
477	0.0004614	70	333	25	596
478	0.0006155	16	308	26	600
479	0.0005196	5	304	21	603
480	0.000576	69	331	19	593
481	0.0005046	61	331	26	601
482	0.0005236	45	326	25	607
483	0.0005041	96	358	28	620
484	0.0005026	62	323	23	576
485	0.0005238	46	331	24	606
486	0.0005002	32	308	24	584
487	0.0005	86	349	24	601
488	0.0005123	16	311	26	606
489	0.0005126	10	306	26	602
490	0.0005605	40	325	25	610
491	0.0004766	6	299	25	592
492	0.0004606	55	332	25	609
493	0.0004758	95	359	27	620
494	0.000523	22	305	27	588
495	0.0004827	34	310	24	570
496	0.0004793	68	339	27	610
497	0.0005193	27	322	25	617
498	0.0004791	59	328	25	594
499	0.0005033	13	303	21	593
500	0.0004708	84	349	27	614
501	0.0005025	60	332	23	604
502	0.000497	3	304	25	605
503	0.000506	3	300	24	597
504	0.0004647	76	344	25	608
505	0.0005118	15	300	21	585
506	0.0004613	59	334	24	609
507	0.0005294	1	289	24	577
508	0.0005046	75	343	25	611
509	0.0004635	54	337	28	615
510	0.0004709	67	337	26	594
511	0.0004543	56	334	26	612
512	0.0004624	27	301	26	575
513	0.0004511	1	292	23	583
514	0.0005438	25	323	24	621
515	0.0005308	43	311	25	574
516	0.0005088	4	287	24	570
517	0.0004907	35	315	23	595
518	0.0004732	71	341	25	611
519	0.0005125	27	299	29	571
520	0.0004693	4	303	25	602
521	0.0004845	65	327	23	589
522	0.0005205	22	308	25	594
523	0.0004603	82	344	26	606
524	0.0004783	63	345	28	627
525	0.0004654	42	317	28	589
526	0.0005509	22	306	24	590
527	0.0004878	52	323	25	594
528	0.000485	68	327	26	586
529	0.0004688	37	309	26	581
530	0.0005146	22	307	25	592
531	0.000468	62	334	26	606
532	0.000528	17	297	24	577
533	0.0004873	1	301	26	601
534	0.0005132	6	295	24	584
535	0.0004599	2	296	22	590
536	0.0004617	74	338	26	598
537	0.0005043	10	302	25	594
538	0.0005208	26	322	29	618
539	0.0005317	41	331	26	620
540	0.0005269	25	311	25	597
541	0.0005563	77	335	26	593
542	0.0005074	100	346	24	592
543	0.0004749	36	318	23	600
544	0.0005014	17	308	24	597
545	0.0004855	23	320	27	617
546	0.0004686	44	318	26	592
547	0.0005738	13	305	27	593
548	0.0004749	88	353	26	618
549	0.0004716	20	305	26	590
550	0.0004804	27	315	28	598
551	0.000559	29	322	27	615
552	0.000506	7	296	23	585
553	0.0004729	106	359	27	611
554	0.0005647	15	313	23	611
555	0.0004807	55	327	25	599
556	0.0004632	67	322	25	577
557	0.0004685	66	339	24	612
558	0.0004873	24	308	26	592
559	0.0005266	65	339	26	613
560	0.0004512	56	336	28	616
561	0.0005655	62	339	28	616
562	0.0004506	56	323	26	590
563	0.0004358	57	329	25	601
564	0.0004559	80	352	28	624
565	0.0004939	18	317	23	616
566	0.0005152	48	318	24	588
567	0.0005028	7	292	22	577
568	0.0004827	26	319	27	612
569	0.0004824	20	320	25	620
570	0.0004839	0	294	24	588
571	0.0004794	41	319	20	597
572	0.0005081	13	311	27	609
573	0.0004892	31	305	22	579
574	0.0004641	38	313	28	588
575	0.0004843	43	325	28	588
576	0.0004853	9	310	24	608
577	0.000499	26	307	29	588
578	0.000504	66	339	27	612
579	0.000489	90	353	27	609
580	0.0004878	67	335	26	603
581	0.0005408	78	348	23	618
582	0.0004892	26	305	27	584
583	0.0004864	2	305	29	608
584	0.0005372	1	312	24	623
585	0.0004804	41	329	24	605
586	0.0005411	71	343	26	615
587	0.0004836	89	354	27	619
588	0.0004697	4	299	23	594
589	0.0004451	54	320	22	586
590	0.0005213	54	322	29	590
591	0.0004698	66	333	28	599
592	0.0004847	83	350	26	617
593	0.0005015	52	326	28	600
594	0.0005075	23	315	26	597
595	0.0005288	3	295	22	587
596	0.0004693	88	344	25	600
597	0.0005103	55	329	22	603
598	0.0005249	51	327	22	603
599	0.0004825	66	327	25	584
600	0.0004667	41	314	28	587
601	0.0004976	94	367	25	638
602	0.0005141	48	326	26	604
603	0.0004651	3	303	25	603
604	0.0004718	69	336	23	603
605	0.0004655	51	330	27	609
606	0.0005053	25	311	24	597
607	0.0004452	82	348	27	606
608	0.0005068	3	292	23	581
609	0.0004841	31	304	22	577
610	0.0004787	85	351	24	616
611	0.0005222	79	350	28	621
612	0.0005929	13	312	26	611
613	0.0004898	21	333	25	637
614	0.0006118	35	318	26	601
615	0.0004735	42	318	24	594
616	0.0004698	19	320	25	604
617	0.0004693	9	299	21	589
618	0.0004692	49	330	23	611
619	0.0004609	66	339	26	612
620	0.0004772	105	369	26	626
621	0.0004866	78	349	27	616
622	0.00046	119	372	27	625
623	0.0005299	18	301	21	584
624	0.0004485	31	300	24	569
625	0.0004404	96	354	27	608
626	0.0004695	13	292	22	571
627	0.0005072	83	346	26	606
628	0.0004845	68	349	26	618
629	0.0004859	12	299	24	586
630	0.0005071	9	299	23	589
631	0.0004881	2	293	26	584
632	0.000491	44	319	21	594
633	0.0005108	3	294	22	585
634	0.0004768	116	366	27	612
635	0.0005019	78	344	27	601
636	0.0004492	33	310	28	587
637	0.0004547	66	321	21	574
638	0.0004453	66	329	22	585
639	0.0004924	76	342	24	608
640	0.0004751	22	303	23	584
641	0.0004851	17	300	28	583
642	0.000446	96	354	29	612
643	0.0004521	70	332	26	594
644	0.0004697	48	319	26	590
645	0.0004902	55	335	22	612
646	0.0005636	57	324	23	591
647	0.0004413	67	325	27	583
648	0.0004993	24	304	23	584
649	0.0004645	101	352	27	603
650	0.0004599	50	322	27	594
651	0.0004597	46	319	24	592
652	0.0004612	87	345	29	603
653	0.0004439	102	364	24	626
654	0.0004583	28	311	24	594
655	0.0004722	50	330	24	610
656	0.0005161	37	324	23	611
657	0.0004605	46	329	24	606
658	0.0004695	27	315	27	603
659	0.0004707	19	313	21	607
660	0.0004933	56	344	25	632
661	0.0004766	83	348	25	613
662	0.0004602	126	383	28	640
663	0.0005138	55	329	28	603
664	0.0004505	43	322	26	601
665	0.0004743	51	320	23	589
666	0.0005086	5	299	25	579
667	0.0004622	52	302	28	552
668	0.0004813	36	326	23	615
669	0.0004521	16	296	24	576
670	0.0004627	100	354	26	608
671	0.0004759	92	350	28	608
672	0.0005004	51	337	26	623
673	0.0005107	86	347	23	608
674	0.0004758	5	297	23	589
675	0.0004524	47	332	24	617
676	0.0005013	80	340	24	600
677	0.000506	6	308	26	604
678	0.0004812	31	319	28	607
679	0.0004845	20	301	23	578
680	0.0005103	65	341	27	617
681	0.0004735	63	320	27	577
682	0.0005553	92	352	27	612
683	0.0004843	8	303	27	596
684	0.0004692	75	337	26	599
685	0.0004946	25	307	24	589
686	0.0004991	34	309	24	584
687	0.0004662	4	297	24	590
688	0.0004503	49	312	23	575
689	0.000479	55	330	21	595
690	0.0004833	26	309	27	592
691	0.0004762	28	310	22	592
692	0.0005883	6	313	26	620
693	0.0005009	7	307	24	607
694	0.0004834	15	316	24	617
695	0.0005393	45	326	21	599
696	0.0004984	27	303	24	579
697	0.0005008	14	306	27	598
698	0.0004725	84	341	24	595
699	0.0004712	103	360	25	617
700	0.0005124	36	308	22	580
701	0.0004753	14	303	26	592
702	0.0004962	40	338	28	629
703	0.0005586	63	339	25	601
704	0.0004905	54	325	23	596
705	0.0004733	51	334	25	614
706	0.0004848	5	295	24	585
707	0.0005507	26	307	19	571
708	0.0004901	4	307	24	610
709	0.000535	40	319	23	591
710	0.000468	50	323	23	589
711	0.000535	86	363	26	640
712	0.0005345	93	354	27	614
713	0.0004715	63	333	28	603
714	0.0004601	48	321	26	594
715	0.0004623	27	308	23	589
716	0.0004862	72	329	28	586
717	0.0005839	27	317	25	603
718	0.0004725	0	314	25	615
719	0.0004416	88	347	27	606
720	0.0004847	25	309	22	593
721	0.0004511	60	319	24	578
722	0.0004901	11	309	24	595
723	0.0005218	54	317	22	580
724	0.0005379	2	299	22	594
725	0.0005175	10	288	21	566
726	0.000453	55	332	22	609
727	0.0005069	6	296	22	586
728	0.0004571	47	312	20	577
729	0.0004452	35	309	25	575
730	0.0004972	16	306	23	596
731	0.0004707	14	308	24	602
732	0.0004989	10	297	21	584
733	0.0006955	50	321	25	579
734	0.0004865	86	344	27	602
735	0.0004342	75	336	25	597
736	0.0004802	17	314	23	611
737	0.000451	59	329	28	599
738	0.0005048	94	346	25	598
739	0.0004844	75	342	24	609
740	0.0004775	57	320	25	583
741	0.0005397	14	295	27	576
742	0.0004587	65	349	28	633
743	0.0004986	30	322	29	614
744	0.0004538	92	339	23	586
745	0.0004516	32	308	23	584
746	0.0004562	64	340	25	616
747	0.0004924	27	309	28	591
748	0.0004775	26	316	20	606
749	0.0005082	81	345	23	609
750	0.0005102	36	320	24	604
751	0.0005408	107	371	24	630
752	0.0005652	28	294	22	560
753	0.0005002	23	299	22	572
754	0.000491	58	332	25	606
755	0.0005315	8	302	26	588
756	0.0004858	5	287	25	569
757	0.0005071	40	329	21	618
758	0.0004943	23	322	23	621
759	0.0005114	6	301	23	596
760	0.0004709	17	306	24	595
761	0.0004735	103	350	29	597
762	0.0004938	47	325	23	603
763	0.000462	40	330	24	620
764	0.0004568	79	358	26	629
765	0.0004365	100	350	28	600
766	0.0005169	54	331	25	593
767	0.0005151	33	309	21	585
768	0.0004539	29	314	24	599
769	0.0004992	3	287	23	571
770	0.0004579	26	313	24	583
771	0.0004527	98	352	28	606
772	0.000476	19	314	25	598
773	0.0004675	5	299	29	593
774	0.0004801	11	296	22	581
775	0.000499	21	304	27	587
776	0.0004811	12	292	23	572
777	0.000484	20	302	26	578
778	0.0004873	80	352	27	616
779	0.0004598	61	335	28	591
780	0.0004627	44	325	23	606
781	0.000467	16	311	25	606
782	0.0004971	3	298	24	593
783	0.0005208	52	329	25	606
784	0.0004825	6	283	22	560
785	0.0005094	29	319	24	592
786	0.0004598	64	342	27	620
787	0.0005926	41	308	22	575
788	0.000466	49	324	24	599
789	0.0004591	36	308	27	570
790	0.0004714	63	328	25	593
791	0.0005207	0	284	22	568
792	0.0005401	28	320	25	612
793	0.0005223	107	364	28	621
794	0.0004638	3	295	26	587
795	0.0004736	15	300	20	585
796	0.0004877	22	313	28	604
797	0.000466	6	315	24	623
798	0.0004724	57	327	28	596
799	0.0004814	26	314	22	602
800	0.0004923	28	307	25	586
801	0.0004604	101	350	27	599
802	0.0004946	25	309	21	593
803	0.0004831	44	324	23	596
804	0.0004777	39	322	21	605
805	0.0004894	32	324	27	616
806	0.0004732	88	355	25	622
807	0.0005023	69	338	27	607
808	0.0004816	101	355	26	609
809	0.0004766	50	324	23	598
810	0.0006636	40	326	23	593
811	0.0004451	29	322	26	615
812	0.000445	103	371	28	633
813	0.0005675	32	308	28	583
814	0.0004663	51	331	24	611
815	0.0004786	54	344	29	625
816	0.0004905	24	301	20	578
817	0.0004784	1	286	21	571
818	0.0004975	36	313	27	590
819	0.0004624	27	301	21	575
820	0.0004861	36	308	24	580
821	0.000457	61	328	23	595
822	0.0005043	61	337	26	613
823	0.0004923	56	344	25	631
824	0.0005546	29	320	25	611
825	0.0004985	83	338	23	593
826	0.0005266	4	292	22	580
827	0.0005176	29	308	24	587
828	0.0004783	16	310	22	604
829	0.0004832	4	307	28	610
830	0.0005007	23	321	26	619
831	0.0005028	16	318	22	620
832	0.00046	31	301	28	566
833	0.0004771	13	309	26	596
834	0.0004874	5	296	24	583
835	0.0004928	34	320	23	602
836	0.0004935	54	333	22	603
837	0.0004657	105	358	27	611
838	0.0004499	32	303	27	574
839	0.000485	71	334	26	597
840	0.0005038	35	315	29	595
841	0.0004765	36	317	25	598
842	0.0004882	13	309	25	605
843	0.0004977	16	290	24	564
844	0.0004744	2	302	27	599
845	0.0004887	5	301	25	596
846	0.000452	61	326	27	591
847	0.0004682	56	325	28	594
848	0.0004528	35	305	23	575
849	0.0004645	27	301	27	575
850	0.0004969	8	286	19	559
851	0.0004999	25	318	26	611
852	0.0004762	51	322	23	593
853	0.0004845	129	378	26	627
854	0.0008321	40	317	22	594
855	0.0004782	41	318	20	595
856	0.0005119	40	311	26	582
857	0.0004716	45	320	24	595
858	0.0005052	81	355	28	620
859	0.0004668	1	288	21	575
860	0.0004835	46	316	22	586
861	0.0005005	1	300	19	595
862	0.000493	17	299	24	578
863	0.0004979	42	320	25	597
864	0.000482	55	336	28	617
865	0.0005002	67	339	22	611
866	0.0004861	26	310	26	594
867	0.0004727	5	310	29	611
868	0.0005335	27	313	25	599
869	0.0004745	88	359	27	630
870	0.0004726	26	315	26	601
871	0.0004985	52	311	27	564
872	0.0004735	24	314	25	602
873	0.0005036	14	317	27	620
874	0.0004503	16	298	20	580
875	0.0004957	8	307	28	606
876	0.0004513	64	340	26	616
877	0.0004937	41	323	22	605
878	0.0004356	104	352	28	600
879	0.0005022	6	330	27	654
880	0.0005139	86	355	26	617
881	0.0005113	50	322	28	594
882	0.0004998	84	359	29	634
883	0.0004851	44	314	29	584
884	0.0004533	36	332	24	628
885	0.0005085	33	310	22	587
886	0.0004408	74	336	27	598
887	0.0005472	24	332	24	640
888	0.0004851	26	312	25	598
889	0.0004688	11	290	20	569
890	0.000532	28	318	22	608
891	0.0004881	5	294	27	583
892	0.0005077	33	321	26	609
893	0.0004854	36	330	27	624
894	0.0004723	8	312	23	616
895	0.0004704	37	317	23	594
896	0.0004952	37	318	23	593
897	0.0005313	28	298	22	568
898	0.0004701	79	344	26	609
899	0.0004825	33	317	28	601
900	0.0004977	9	301	27	593
901	0.0004643	66	347	29	628
902	0.0004673	60	338	22	616
903	0.0004792	30	319	21	608
904	0.0004902	26	317	27	605
905	0.000489	39	323	23	607
906	0.0005069	13	301	23	589
907	0.0004587	45	313	26	581
908	0.0004557	10	288	24	566
909	0.0004692	19	316	25	613
910	0.0004608	7	297	23	587
911	0.000475	17	308	25	599
912	0.0004503	30	314	23	598
913	0.000488	63	345	25	627
914	0.0004714	9	304	24	599
915	0.0004746	119	388	28	649
916	0.000483	74	326	28	577
917	0.0005269	36	310	27	584
918	0.0004814	14	294	26	574
919	0.0004713	109	364	28	619
920	0.0004718	29	298	23	567
921	0.0005197	93	351	26	609
922	0.0005011	26	296	22	566
923	0.0004465	85	346	25	607
924	0.0004943	40	315	23	590
925	0.00047	70	343	23	616
926	0.0004964	20	306	22	592
927	0.0004737	38	317	23	596
928	0.0004658	23	312	27	601
929	0.0004769	4	321	27	638
930	0.0004742	11	295	22	577
931	0.0004589	39	317	23	593
932	0.0004551	63	336	25	609
933	0.0004983	59	324	24	589
934	0.0004641	41	313	24	585
935	0.0004714	56	331	25	600
936	0.0004517	54	326	29	598
937	0.0005165	10	313	23	616
938	0.0004698	86	354	25	622
939	0.0004737	85	344	25	596
940	0.0004963	26	312	27	591
941	0.0004786	22	313	26	604
942	0.000512	82	338	25	594
943	0.0004923	28	321	29	611
944	0.0004908	73	335	25	595
945	0.0004675	8	304	22	600
946	0.0004675	76	342	24	607
947	0.000474	35	307	29	579
948	0.0004557	28	305	26	582
949	0.0005229	30	319	22	608
950	0.0004992	58	327	27	596
951	0.0004756	7	319	26	617
952	0.0004659	62	335	25	602
953	0.0004668	32	324	24	616
954	0.0004772	60	344	25	617
955	0.0005	33	317	24	601
956	0.0004719	9	303	24	597
957	0.000485	62	329	25	596
958	0.0004862	74	343	25	596
959	0.0004573	98	360	28	617
960	0.0005192	39	311	27	583
961	0.0005342	32	317	25	602
962	0.0004895	109	372	24	619
963	0.0004562	74	339	25	604
964	0.0004431	65	344	25	623
965	0.0004596	61	322	27	581
966	0.0004804	105	369	27	626
967	0.0004787	76	345	25	614
968	0.0004811	40	318	28	596
969	0.0004805	44	321	25	598
970	0.0004941	52	331	27	610
971	0.000483	66	344	25	612
972	0.0004804	18	308	23	598
973	0.0004579	49	326	28	601
974	0.0004748	57	329	25	601
975	0.0004578	79	342	27	605
976	0.0004845	17	299	20	581
977	0.0004624	70	340	24	610
978	0.0004909	3	293	20	583
979	0.000537	43	321	22	599
980	0.0005111	40	321	24	602
981	0.0004948	62	321	23	580
982	0.0004489	87	354	28	621
983	0.0004506	80	351	28	622
984	0.0004953	75	346	26	609
985	0.0005166	58	328	29	598
986	0.0004595	64	334	24	603
987	0.0004746	8	307	26	606
988	0.0004616	24	310	27	596
989	0.000485	70	333	27	595
990	0.0004916	92	366	27	630
991	0.0004999	128	381	27	634
992	0.0004898	56	328	24	585
993	0.000597	46	327	27	608
994	0.0005025	45	322	26	599
995	0.0005004	37	317	23	597
996	0.0004895	49	309	22	569
997	0.0004827	70	336	28	602
998	0.0004766	50	342	25	621
999	0.0004879	23	310	27	587
mean	0.000488637	43.458	322.045	24.908	598.798

## Sheet: PolyMin_SEq
	time	SEq	Bal	Reg	Egal
0	0.0034506	17	316	24	615
1	0.0033283	38	320	22	602
2	0.0034564	28	303	25	578
3	0.0031875	40	307	21	574
4	0.003206	1	297	22	593
5	0.0035477	28	322	20	616
6	0.004028	1	295	22	589
7	0.0037141	1	307	22	613
8	0.0034977	58	335	25	612
9	0.0035858	14	299	22	584
10	0.0036476	24	308	27	592
11	0.003215	13	306	22	599
12	0.0036109	8	313	27	618
13	0.0040588	23	324	25	625
14	0.0034104	6	300	19	594
15	0.0030943	28	313	26	598
16	0.0037154	53	328	27	603
17	0.0033522	15	298	23	581
18	0.0035317	46	327	25	608
19	0.0034611	6	299	21	592
20	0.0032444	12	316	23	620
21	0.0035263	18	305	21	592
22	0.0033394	21	310	21	599
23	0.0032005	29	307	24	585
24	0.0036019	4	297	25	590
25	0.0034778	16	305	22	594
26	0.0032146	1	292	25	583
27	0.0033757	5	300	23	595
28	0.0031452	7	294	20	581
29	0.0029079	4	305	27	606
30	0.0033933	13	301	26	589
31	0.0031738	2	293	23	584
32	0.0035244	14	306	25	598
33	0.003086	26	311	21	596
34	0.0033824	47	337	25	627
35	0.0033753	15	302	23	589
36	0.0035187	29	303	25	577
37	0.0034779	19	305	25	591
38	0.00344	25	304	28	583
39	0.0035047	16	305	23	594
40	0.0033294	14	297	25	580
41	0.003387	71	327	24	583
42	0.0035505	39	321	26	603
43	0.0031002	2	294	26	586
44	0.0037248	13	315	28	617
45	0.0032278	4	292	21	580
46	0.0032518	20	316	24	612
47	0.0033133	2	302	24	602
48	0.0032321	22	303	26	584
49	0.0030652	5	308	26	611
50	0.0034299	18	303	27	588
51	0.0032575	1	307	27	613
52	0.0030854	13	287	22	561
53	0.0032618	10	295	26	580
54	0.0032059	4	285	25	566
55	0.0030918	3	297	28	591
56	0.0031187	8	296	22	584
57	0.0030384	7	312	24	617
58	0.0033209	6	290	19	574
59	0.003076	9	296	21	583
60	0.0035144	23	306	23	589
61	0.0032852	28	327	27	626
62	0.0031988	11	292	20	573
63	0.0032336	5	293	27	581
64	0.0032175	30	300	23	570
65	0.0033293	26	304	20	582
66	0.0032101	0	298	23	596
67	0.0034349	43	322	22	601
68	0.0033261	4	294	23	584
69	0.0031807	25	298	27	571
70	0.0035447	40	311	24	582
71	0.0032414	17	303	23	589
72	0.0031709	7	300	27	593
73	0.0031742	12	304	28	596
74	0.0033617	36	331	27	626
75	0.0036828	10	298	20	586
76	0.0035271	29	312	28	595
77	0.0033485	18	298	23	578
78	0.0031721	45	313	21	581
79	0.0035255	29	316	22	603
80	0.0037818	7	298	19	589
81	0.0036313	31	316	23	601
82	0.0031529	25	306	27	587
83	0.0036494	12	299	22	586
84	0.0034076	22	300	20	578
85	0.0035504	40	319	21	598
86	0.0033214	4	300	21	596
87	0.0033332	26	307	22	588
88	0.0032631	1	297	21	593
89	0.003444	17	298	22	579
90	0.0032461	14	310	23	606
91	0.0030855	20	308	25	596
92	0.0033103	53	320	22	587
93	0.0031456	6	300	22	594
94	0.0034845	39	315	25	591
95	0.0032804	28	302	21	576
96	0.0033573	29	292	20	555
97	0.003454	21	310	25	599
98	0.0033574	7	294	24	581
99	0.0036987	68	328	25	588
100	0.0030801	10	289	21	568
101	0.0031349	21	317	25	613
102	0.0033074	3	285	24	567
103	0.003517	1	295	22	589
104	0.0032539	88	345	26	602
105	0.0032872	22	303	24	584
106	0.0032891	40	314	22	588
107	0.0032442	29	301	25	573
108	0.0034344	10	302	22	594
109	0.0035488	42	323	28	604
110	0.0029871	32	294	22	556
111	0.0031952	46	319	24	592
112	0.0033233	17	302	22	587
113	0.0033044	21	302	21	583
114	0.0035392	39	317	20	595
115	0.0033892	21	304	23	587
116	0.0032275	4	301	21	598
117	0.0031809	26	313	28	600
118	0.0033841	6	297	27	588
119	0.0034803	13	312	24	611
120	0.0035437	58	324	23	590
121	0.0031226	8	288	21	568
122	0.0034092	31	305	23	579
123	0.0033476	36	316	20	596
124	0.0033325	14	305	26	596
125	0.003409	31	314	20	597
126	0.0034461	16	295	24	574
127	0.0031171	4	297	25	590
128	0.0032314	1	287	21	573
129	0.003375	26	315	23	604
130	0.0033583	35	313	24	591
131	0.0033523	24	311	24	598
132	0.0034021	12	304	26	596
133	0.003302	33	309	23	585
134	0.0032069	3	294	28	585
135	0.003268	10	297	21	584
136	0.0046232	11	301	24	591
137	0.0032756	11	309	24	607
138	0.0033244	18	307	23	596
139	0.0032898	27	300	29	573
140	0.0032507	8	306	26	604
141	0.0034779	10	296	25	582
142	0.0036962	25	308	24	591
143	0.0032684	2	300	26	598
144	0.0033233	6	300	21	594
145	0.0033404	18	320	25	622
146	0.0034528	9	291	24	573
147	0.0030241	66	343	29	620
148	0.00341	26	308	28	590
149	0.0032821	20	304	20	588
150	0.0034098	41	325	21	609
151	0.0032524	17	298	21	579
152	0.0033153	14	297	20	580
153	0.003252	19	299	22	579
154	0.0035286	36	316	24	596
155	0.0032893	7	295	24	583
156	0.0033032	24	314	29	604
157	0.0033939	5	291	23	577
158	0.0035916	20	309	26	598
159	0.0033795	17	297	22	577
160	0.0032984	25	304	22	583
161	0.0033571	68	331	23	594
162	0.0031609	12	299	25	586
163	0.0036014	63	333	21	603
164	0.0032022	16	304	26	592
165	0.003544	52	337	26	622
166	0.0031729	20	290	19	560
167	0.0031611	0	293	24	586
168	0.0033789	0	284	26	568
169	0.0030874	2	285	27	568
170	0.0033625	53	324	25	595
171	0.0032457	27	294	22	561
172	0.0034866	11	289	20	567
173	0.0031382	19	300	20	581
174	0.0031695	35	306	21	577
175	0.0034405	40	317	22	594
176	0.0030924	52	322	26	592
177	0.0034525	85	341	25	597
178	0.0032758	8	306	23	604
179	0.0034604	18	306	21	594
180	0.0035362	96	351	28	606
181	0.003431	38	337	25	636
182	0.0033341	30	325	24	620
183	0.0032223	23	309	29	595
184	0.0034077	16	307	25	598
185	0.0031433	20	303	24	586
186	0.0035038	14	306	27	598
187	0.0033392	56	329	26	602
188	0.0032779	4	300	25	596
189	0.0034019	39	304	25	569
190	0.0032894	1	285	23	569
191	0.0031589	3	291	25	579
192	0.0033691	17	304	25	591
193	0.0036537	2	298	28	594
194	0.0031044	4	294	24	584
195	0.0034201	16	325	24	634
196	0.0032862	37	317	24	597
197	0.0033921	35	319	28	603
198	0.0031117	16	314	24	612
199	0.0036329	66	338	22	610
200	0.0033832	32	314	25	596
201	0.0031089	6	295	25	584
202	0.0034792	13	294	29	575
203	0.0034913	5	302	23	599
204	0.0032206	15	310	23	605
205	0.0032811	7	293	28	579
206	0.0033031	7	304	27	601
207	0.003529	32	318	24	604
208	0.0034065	36	331	25	626
209	0.003248	27	318	25	609
210	0.003383	12	306	26	600
211	0.0029985	4	302	26	600
212	0.0035516	16	299	21	582
213	0.0034442	2	295	25	588
214	0.0035609	0	299	29	598
215	0.0033846	6	317	23	628
216	0.0029418	24	296	29	568
217	0.0031634	45	329	29	613
218	0.0031399	23	302	23	581
219	0.0034349	28	302	29	576
220	0.0033427	14	302	21	590
221	0.0035182	27	317	25	607
222	0.0031968	11	297	23	583
223	0.0032851	0	289	25	578
224	0.0033961	14	309	25	604
225	0.0035827	35	317	25	599
226	0.0030083	9	311	29	613
227	0.0031737	7	295	23	583
228	0.0032685	13	298	21	583
229	0.003484	18	315	25	612
230	0.0033869	19	306	24	593
231	0.0030895	65	333	28	601
232	0.0033943	22	298	23	574
233	0.0032721	17	306	22	595
234	0.0033171	40	327	24	614
235	0.0031258	1	296	21	591
236	0.0033759	13	324	23	635
237	0.0030888	5	300	22	595
238	0.0036752	2	289	19	576
239	0.0032532	12	303	24	594
240	0.003056	27	304	27	581
241	0.0036649	30	315	25	600
242	0.0030894	7	317	27	627
243	0.0034252	1	310	23	619
244	0.0032745	35	316	24	597
245	0.0033748	0	300	25	600
246	0.003275	3	296	22	589
247	0.0033253	20	312	26	604
248	0.0033846	21	299	20	577
249	0.0035212	22	300	24	578
250	0.0032572	11	294	23	577
251	0.0031396	4	293	27	582
252	0.0037123	4	288	26	572
253	0.0034633	16	291	22	566
254	0.0034924	25	303	24	581
255	0.0033906	0	300	26	600
256	0.0030438	9	292	23	575
257	0.0033852	36	313	28	590
258	0.0031088	14	296	29	578
259	0.0030451	44	324	22	604
260	0.0034169	31	314	28	597
261	0.0030958	28	305	26	582
262	0.0034005	14	285	20	556
263	0.0030007	9	285	23	561
264	0.0031989	26	307	27	588
265	0.0032982	3	301	26	599
266	0.0032126	11	303	22	595
267	0.0036744	20	313	24	606
268	0.0031725	8	304	26	600
269	0.0033601	34	301	20	568
270	0.0031039	37	324	26	611
271	0.0032269	10	288	22	566
272	0.0034343	12	297	26	582
273	0.0031591	47	322	25	597
274	0.0035602	18	298	27	578
275	0.0035648	3	303	23	603
276	0.0033824	2	307	22	612
277	0.0036141	9	317	23	625
278	0.0033873	46	319	24	592
279	0.0032777	21	303	21	585
280	0.0033531	23	300	21	577
281	0.0036507	7	301	23	595
282	0.0032729	22	300	23	578
283	0.0033187	8	294	20	580
284	0.0047472	1	293	25	585
285	0.0033667	47	326	26	605
286	0.0035015	5	311	23	617
287	0.0035452	14	300	22	586
288	0.0032077	45	310	22	575
289	0.0031869	39	314	23	589
290	0.0033146	22	303	23	584
291	0.0031517	21	302	28	583
292	0.0032169	3	297	22	591
293	0.0031827	4	287	22	570
294	0.0034088	70	334	24	598
295	0.0033149	9	315	24	621
296	0.0033067	7	294	25	581
297	0.0031074	2	288	24	574
298	0.0037484	3	304	21	605
299	0.003382	38	305	25	572
300	0.0033114	1	281	20	561
301	0.0033197	43	315	22	587
302	0.0034366	44	316	28	588
303	0.0032751	5	301	21	597
304	0.0031939	48	312	20	576
305	0.0035613	10	290	19	570
306	0.0031142	20	309	25	598
307	0.0032454	27	305	25	583
308	0.0029724	2	298	23	594
309	0.0032353	17	291	26	565
310	0.0032736	10	288	21	566
311	0.0034236	17	299	27	581
312	0.0032682	20	320	24	620
313	0.0035006	34	309	23	584
314	0.0031871	28	305	23	582
315	0.0034111	47	318	26	589
316	0.0031195	5	299	22	593
317	0.0034358	9	298	19	587
318	0.0035025	3	291	22	579
319	0.0033586	31	308	24	585
320	0.0033912	51	330	25	609
321	0.0034201	17	309	27	601
322	0.0039982	1	291	23	581
323	0.0035907	4	293	20	582
324	0.0033382	4	309	24	614
325	0.003307	7	302	22	597
326	0.0043157	31	313	25	595
327	0.0033319	22	298	21	574
328	0.0033717	42	321	26	600
329	0.0034401	31	308	22	585
330	0.003547	13	300	21	587
331	0.0033367	15	320	29	625
332	0.0031698	29	313	23	597
333	0.0033081	28	305	26	582
334	0.003342	1	294	24	587
335	0.0034887	26	320	26	614
336	0.0031834	17	294	23	571
337	0.0032416	6	303	24	600
338	0.00322	43	319	24	595
339	0.0035299	17	303	22	589
340	0.0031892	26	311	22	596
341	0.0032626	29	319	25	609
342	0.0034429	4	297	23	590
343	0.003229	9	298	21	587
344	0.0035349	12	318	26	624
345	0.0036818	27	306	20	585
346	0.003471	53	320	26	587
347	0.0033166	3	290	27	577
348	0.0037499	28	302	23	576
349	0.0034017	11	297	22	583
350	0.0034339	17	320	23	623
351	0.0036184	64	320	22	576
352	0.0034597	3	305	24	607
353	0.0035701	13	300	26	587
354	0.0035157	2	291	21	580
355	0.0032946	5	302	25	599
356	0.0032764	4	303	26	602
357	0.0033717	7	303	21	599
358	0.0031662	7	303	28	599
359	0.0033721	4	300	25	596
360	0.0031078	3	290	26	577
361	0.0033898	7	290	24	573
362	0.0033351	10	290	26	570
363	0.0032987	25	298	23	571
364	0.003299	56	317	24	578
365	0.0032558	11	303	23	595
366	0.0030482	3	289	21	575
367	0.0033496	47	328	26	609
368	0.0030493	28	298	24	568
369	0.0032639	39	322	28	605
370	0.0033185	44	320	22	596
371	0.003319	9	296	25	583
372	0.0033643	6	297	20	588
373	0.0035212	40	324	28	608
374	0.0035283	55	323	23	591
375	0.0032683	16	296	27	576
376	0.0031249	4	303	23	602
377	0.0031911	13	313	25	613
378	0.0031015	0	297	28	594
379	0.0035061	25	322	23	619
380	0.00381	33	314	26	595
381	0.0033881	25	297	24	569
382	0.0033296	8	301	23	594
383	0.0034362	7	301	27	595
384	0.0032841	41	315	23	589
385	0.0032612	24	314	22	604
386	0.0033243	61	316	21	571
387	0.003361	28	312	23	596
388	0.0034289	30	312	23	594
389	0.0037344	36	308	26	580
390	0.0031449	7	306	22	605
391	0.0036447	7	302	27	597
392	0.0031009	54	327	27	600
393	0.0030687	23	308	25	593
394	0.0037551	50	324	23	598
395	0.0029489	21	292	25	563
396	0.0034403	18	302	24	586
397	0.0035294	33	306	29	579
398	0.0033774	0	302	26	604
399	0.0031798	20	301	22	582
400	0.0033947	14	294	25	574
401	0.0032852	37	317	23	597
402	0.0031993	25	307	24	589
403	0.003261	11	321	29	631
404	0.0032722	9	308	22	607
405	0.0032849	19	294	25	569
406	0.0036921	51	333	23	615
407	0.0029117	97	353	28	609
408	0.0031249	19	317	29	615
409	0.0032923	8	294	22	580
410	0.0035419	21	300	22	579
411	0.0032259	26	321	27	616
412	0.0034671	54	325	26	596
413	0.0033963	9	301	22	593
414	0.0035275	34	312	22	590
415	0.0032755	1	283	22	565
416	0.003313	21	308	24	595
417	0.0033401	38	321	23	604
418	0.0037987	1	308	25	615
419	0.0034114	5	302	25	599
420	0.0032002	39	319	22	599
421	0.0033064	18	310	25	602
422	0.0032455	14	296	25	578
423	0.0033441	18	309	24	600
424	0.003202	37	332	27	627
425	0.0038285	35	317	24	599
426	0.0030991	5	287	22	569
427	0.0032061	12	309	24	606
428	0.0035798	29	310	27	591
429	0.0034753	15	305	25	595
430	0.0034189	21	288	22	555
431	0.003599	8	304	25	600
432	0.0033206	47	324	26	601
433	0.0032114	27	312	26	597
434	0.0034216	7	312	27	617
435	0.0031531	35	317	24	599
436	0.0032248	38	315	22	592
437	0.0036011	13	300	22	587
438	0.0032131	18	300	28	582
439	0.0036434	3	289	23	575
440	0.0034796	32	322	28	612
441	0.0033285	54	330	22	606
442	0.0034824	15	309	24	603
443	0.0031919	45	305	23	565
444	0.0034014	11	294	27	577
445	0.003038	41	310	25	579
446	0.0035539	17	319	27	621
447	0.0036757	28	321	29	614
448	0.0033176	41	317	25	593
449	0.0035198	2	297	28	592
450	0.003465	6	301	26	596
451	0.0032957	13	288	20	563
452	0.0033473	11	313	25	615
453	0.0033822	4	316	27	628
454	0.0031472	10	296	21	582
455	0.0036166	37	325	29	613
456	0.003308	1	289	24	577
457	0.0031632	24	310	24	596
458	0.0032971	3	309	24	615
459	0.0032968	7	307	25	607
460	0.0031924	37	315	25	593
461	0.0032327	9	292	23	575
462	0.0032851	7	295	22	583
463	0.0031409	44	316	22	588
464	0.0034151	44	320	26	596
465	0.0033171	75	329	25	583
466	0.0035048	6	300	19	594
467	0.0034794	42	302	23	562
468	0.004327	9	303	24	597
469	0.0033329	19	290	22	561
470	0.0032311	46	323	27	600
471	0.0032621	19	298	23	577
472	0.0030627	40	303	25	566
473	0.0033748	45	322	29	599
474	0.0032688	28	318	23	608
475	0.0031911	10	285	22	560
476	0.0029874	1	291	23	581
477	0.0033187	32	307	24	582
478	0.003144	26	314	26	602
479	0.003093	64	329	21	594
480	0.0034174	41	309	19	577
481	0.0033684	10	296	22	582
482	0.0031635	34	318	28	602
483	0.0035636	14	305	22	596
484	0.0034827	5	281	23	557
485	0.0040124	41	322	24	603
486	0.0032931	5	296	24	587
487	0.0033112	14	296	21	578
488	0.0033785	21	309	26	597
489	0.0036788	10	306	26	602
490	0.0030982	25	312	23	599
491	0.0032988	48	317	25	586
492	0.0031398	22	311	26	600
493	0.003344	48	322	22	596
494	0.0035262	4	296	26	588
495	0.003265	27	298	24	569
496	0.0034969	14	304	22	594
497	0.0032254	14	313	25	612
498	0.0031348	42	316	25	590
499	0.0032343	13	303	21	593
500	0.0033336	19	306	22	593
501	0.003513	17	303	25	589
502	0.0032965	26	314	25	602
503	0.0032631	3	300	24	597
504	0.0034569	29	313	25	597
505	0.0032278	4	293	20	582
506	0.0033481	18	308	25	598
507	0.0035084	53	314	24	575
508	0.0033755	43	323	25	603
509	0.0032577	44	331	26	618
510	0.0035115	43	312	23	581
511	0.0033815	14	299	27	584
512	0.0032558	4	287	26	570
513	0.0032589	37	306	23	575
514	0.0033751	13	310	22	607
515	0.0037969	27	296	23	565
516	0.0031508	14	286	22	558
517	0.0033128	3	295	20	587
518	0.0033562	39	327	21	615
519	0.0030172	27	299	29	571
520	0.0033864	60	327	23	594
521	0.003286	47	313	23	579
522	0.0032747	55	321	25	587
523	0.0035574	26	307	27	588
524	0.0037422	43	332	28	621
525	0.0034189	14	295	24	576
526	0.0031139	22	306	24	590
527	0.0032169	26	313	25	600
528	0.0033887	22	299	25	576
529	0.0032704	3	287	21	571
530	0.0031933	16	304	25	592
531	0.0033563	12	299	21	586
532	0.003473	4	286	21	568
533	0.0030595	1	301	26	601
534	0.0031255	3	292	24	581
535	0.0031894	2	296	22	590
536	0.0033478	0	284	20	568
537	0.0032445	10	302	25	594
538	0.0033576	26	322	29	618
539	0.0033006	2	300	26	598
540	0.0032071	2	297	26	592
541	0.0035311	20	292	22	564
542	0.0040192	23	314	22	605
543	0.0035243	12	305	23	598
544	0.0032384	20	305	24	590
545	0.0036904	23	320	27	617
546	0.0034234	14	295	23	576
547	0.0030504	43	316	27	589
548	0.0038209	4	303	26	602
549	0.0031154	43	315	22	587
550	0.0033771	27	318	28	609
551	0.0033806	30	313	24	596
552	0.0031419	21	302	25	583
553	0.0033368	13	298	21	583
554	0.003301	15	313	25	611
555	0.0034684	5	301	26	597
556	0.0034932	20	305	23	590
557	0.0032692	5	295	22	585
558	0.0031872	24	308	26	592
559	0.0033662	10	301	26	592
560	0.0032494	41	316	24	591
561	0.003437	5	308	25	611
562	0.0033567	42	314	26	586
563	0.003641	1	295	24	589
564	0.0033216	29	321	25	613
565	0.0033249	46	324	23	602
566	0.0034097	1	295	23	589
567	0.0032462	7	292	22	577
568	0.0031941	8	311	24	614
569	0.0032596	48	330	25	612
570	0.0033106	30	306	26	582
571	0.0034235	12	310	20	608
572	0.0032415	37	321	27	605
573	0.0035795	31	305	22	579
574	0.0033818	11	297	24	583
575	0.0033749	31	304	23	577
576	0.0032462	33	319	24	605
577	0.0031351	25	305	29	585
578	0.0032763	15	302	25	589
579	0.0034139	1	292	23	583
580	0.0033156	11	302	24	593
581	0.0036424	50	334	21	618
582	0.0033332	13	298	27	583
583	0.0035379	2	305	29	608
584	0.0033756	1	312	24	623
585	0.0033245	37	322	24	607
586	0.0034891	6	305	23	604
587	0.0034943	27	309	23	591
588	0.003167	38	306	23	574
589	0.0033611	8	288	19	568
590	0.003522	10	299	29	588
591	0.0031851	24	307	29	590
592	0.0036014	8	301	23	594
593	0.0032644	24	308	23	592
594	0.0032747	26	313	26	600
595	0.0032081	34	305	22	576
596	0.0035936	43	331	20	619
597	0.0033643	1	314	22	627
598	0.0033686	26	315	22	604
599	0.0034165	2	283	24	564
600	0.0032133	24	301	24	578
601	0.003576	40	325	27	610
602	0.0036937	23	312	23	601
603	0.0033132	57	326	25	595
604	0.0041587	9	307	21	605
605	0.0033325	22	310	27	598
606	0.0035092	28	307	21	586
607	0.0034296	23	301	25	579
608	0.0034014	23	299	23	575
609	0.0032353	25	299	22	573
610	0.0034106	28	306	26	584
611	0.0036188	21	316	23	611
612	0.0032456	7	310	24	613
613	0.0031498	25	327	25	629
614	0.0032962	47	323	26	599
615	0.0033783	21	303	24	585
616	0.0031874	40	322	25	604
617	0.0031069	8	298	21	588
618	0.0036613	26	320	23	614
619	0.00332	17	308	25	599
620	0.0036172	45	321	23	597
621	0.0036042	4	306	26	608
622	0.0035845	22	316	24	610
623	0.0033711	0	291	20	582
624	0.0032693	2	285	24	568
625	0.0034517	32	303	27	574
626	0.0031795	13	292	22	571
627	0.0039449	9	300	24	591
628	0.0033568	6	307	23	608
629	0.0029991	12	299	24	586
630	0.0033167	9	299	23	589
631	0.0031723	29	304	26	579
632	0.0033502	25	307	21	589
633	0.0032765	7	295	22	583
634	0.0034114	26	298	21	570
635	0.0033583	7	299	23	591
636	0.0033075	12	294	28	576
637	0.0034382	29	294	21	559
638	0.0032202	0	287	22	574
639	0.0036087	16	305	21	594
640	0.0032877	5	290	25	575
641	0.0034353	14	298	22	582
642	0.0035569	66	338	25	610
643	0.0034341	19	301	24	583
644	0.0034496	50	316	22	582
645	0.003329	7	302	22	597
646	0.0033757	7	291	24	575
647	0.0033572	3	295	20	587
648	0.0033686	51	317	23	583
649	0.003564	30	313	22	596
650	0.0033173	8	295	22	582
651	0.0031124	8	296	24	584
652	0.0034617	24	301	28	578
653	0.0037557	22	319	29	616
654	0.003092	10	302	24	594
655	0.0032892	3	305	22	607
656	0.0035832	10	305	23	600
657	0.00336	5	299	22	593
658	0.0031727	1	303	25	605
659	0.0033599	19	313	21	607
660	0.0033721	13	314	22	615
661	0.0035082	22	311	29	600
662	0.0037715	10	312	27	614
663	0.0033595	55	329	28	603
664	0.0031545	6	297	26	588
665	0.0031872	4	290	23	576
666	0.0030339	5	299	25	593
667	0.0032434	52	302	28	552
668	0.0032778	10	310	23	610
669	0.003015	1	286	25	571
670	0.0034198	32	306	26	580
671	0.0035711	1	296	27	591
672	0.0031799	5	309	25	613
673	0.0034975	20	309	22	598
674	0.0031411	26	307	23	588
675	0.0034448	8	305	23	602
676	0.0034296	48	318	21	588
677	0.0032768	62	333	26	604
678	0.0032242	9	303	29	597
679	0.0030835	12	293	23	574
680	0.0034741	13	314	24	615
681	0.0033243	11	289	27	567
682	0.0033359	3	294	21	585
683	0.0034165	41	312	28	583
684	0.0033209	50	319	26	588
685	0.0033088	2	292	24	582
686	0.0032585	34	309	24	584
687	0.0032728	39	311	25	583
688	0.003178	8	289	23	570
689	0.0033114	7	299	24	591
690	0.0031125	1	292	27	583
691	0.0031369	28	310	22	592
692	0.0034283	6	313	26	620
693	0.0031406	21	314	24	607
694	0.0034609	6	311	24	616
695	0.0033207	21	307	21	593
696	0.0032318	27	303	24	579
697	0.0031462	11	304	27	597
698	0.0033866	29	304	21	579
699	0.0035178	5	297	24	589
700	0.0030953	36	308	22	580
701	0.003259	3	294	23	585
702	0.0030821	40	338	28	636
703	0.0034364	6	297	26	588
704	0.0032554	1	290	20	579
705	0.0032152	1	299	24	597
706	0.0032262	22	303	29	584
707	0.0030698	45	308	19	571
708	0.0033103	4	307	24	610
709	0.0031602	21	303	23	585
710	0.0035441	41	314	23	587
711	0.0039325	14	316	25	618
712	0.0035155	33	316	28	599
713	0.0033079	9	295	22	581
714	0.003237	48	321	26	594
715	0.0037585	16	302	23	588
716	0.0033471	12	287	25	562
717	0.0033277	13	305	25	597
718	0.0032929	22	321	25	620
719	0.0036359	6	296	25	586
720	0.00316	9	301	22	593
721	0.0032321	60	319	24	578
722	0.0032965	43	319	24	595
723	0.0034622	24	300	22	576
724	0.0037713	2	299	22	596
725	0.0031361	10	288	21	566
726	0.0034065	38	326	22	614
727	0.0030908	9	296	22	583
728	0.0035416	18	295	20	572
729	0.0033468	39	298	25	557
730	0.0031008	8	301	23	594
731	0.0035513	27	310	24	593
732	0.0031159	14	297	21	580
733	0.0033507	11	290	22	569
734	0.0044086	7	301	24	595
735	0.0035631	0	296	25	592
736	0.0034022	16	314	23	612
737	0.0035647	11	302	27	593
738	0.0034922	37	309	20	581
739	0.0039406	4	303	22	602
740	0.0034086	6	285	24	564
741	0.0032446	11	291	28	571
742	0.0034992	28	320	22	612
743	0.0029137	30	322	29	614
744	0.0032974	68	324	23	580
745	0.0032221	16	298	23	580
746	0.0036207	16	312	25	608
747	0.0035179	10	300	28	590
748	0.0033389	7	303	20	599
749	0.0033154	14	302	23	590
750	0.0035097	22	322	23	622
751	0.0035416	3	300	22	597
752	0.0030493	28	294	22	560
753	0.0030793	23	304	22	585
754	0.0032298	16	305	25	594
755	0.0030833	14	307	26	600
756	0.0031541	5	287	29	569
757	0.003385	6	304	21	602
758	0.0034706	52	332	23	612
759	0.003254	6	300	24	594
760	0.0033195	4	298	24	592
761	0.0036788	68	329	21	590
762	0.0034524	47	325	24	603
763	0.003253	3	304	24	605
764	0.0035232	75	342	20	609
765	0.0033813	22	300	22	578
766	0.0032362	18	304	24	590
767	0.0033245	1	288	20	575
768	0.0033557	39	310	23	581
769	0.003064	3	287	23	571
770	0.0033901	26	313	24	600
771	0.0038708	44	317	28	590
772	0.0030603	26	311	25	596
773	0.0031202	12	301	29	590
774	0.0032319	11	296	22	581
775	0.0033425	21	304	28	587
776	0.0033834	12	292	23	572
777	0.0032828	42	310	26	578
778	0.00367	71	332	22	593
779	0.0032555	12	305	24	598
780	0.003402	0	299	23	598
781	0.0032872	47	326	25	605
782	0.0031043	45	319	24	593
783	0.0033291	23	313	25	603
784	0.0032412	6	283	22	560
785	0.0031994	35	310	24	585
786	0.0035884	14	310	21	606
787	0.0032348	17	292	22	567
788	0.003641	30	310	24	590
789	0.0032284	7	286	27	565
790	0.0032444	26	306	24	586
791	0.003095	16	292	20	568
792	0.0030483	28	320	25	612
793	0.0034391	50	326	22	602
794	0.0032813	24	300	26	576
795	0.0031486	15	300	20	585
796	0.0033009	22	313	28	604
797	0.0030783	35	326	24	617
798	0.0033396	23	313	24	603
799	0.0031325	13	303	22	593
800	0.0032811	18	300	25	582
801	0.0034821	1	287	22	573
802	0.0035096	5	298	21	591
803	0.003225	33	306	21	579
804	0.0032207	23	313	22	603
805	0.0029543	32	324	27	616
806	0.0035377	9	306	21	603
807	0.0033177	9	300	24	591
808	0.0034437	37	311	24	585
809	0.0032212	21	304	23	587
810	0.0031673	59	326	23	593
811	0.0034531	4	305	24	606
812	0.0035763	36	319	28	602
813	0.0032821	15	290	28	565
814	0.0034098	4	297	22	590
815	0.0033363	32	321	26	610
816	0.0032754	3	290	20	577
817	0.0032932	1	286	21	571
818	0.0035484	19	303	29	587
819	0.0033002	19	296	22	573
820	0.0032948	8	285	24	562
821	0.0035257	2	291	22	580
822	0.0033724	7	305	25	603
823	0.0033075	8	317	25	626
824	0.0036903	29	320	25	611
825	0.0033722	27	314	22	601
826	0.0032466	4	292	24	580
827	0.0035737	9	291	20	573
828	0.0033141	16	310	22	604
829	0.0035704	35	317	26	599
830	0.0035903	23	314	25	605
831	0.0031294	16	318	22	620
832	0.0032254	18	291	25	564
833	0.0030702	38	317	26	596
834	0.0032159	39	311	24	583
835	0.003169	1	300	23	599
836	0.0032683	30	311	22	592
837	0.0035042	24	310	29	596
838	0.0034146	7	286	26	565
839	0.0032613	54	323	26	592
840	0.0034363	11	302	29	593
841	0.003593	1	297	21	593
842	0.0035692	18	306	24	594
843	0.0031675	16	290	24	564
844	0.0033468	31	310	26	589
845	0.0030571	16	306	25	596
846	0.0038259	13	299	23	585
847	0.0032836	18	296	21	574
848	0.0033256	11	292	24	573
849	0.0033809	5	290	27	575
850	0.0030467	13	286	19	559
851	0.0032184	44	324	24	604
852	0.0032994	7	295	24	583
853	0.0036381	31	312	20	593
854	0.0033163	12	302	22	592
855	0.003366	1	293	20	585
856	0.0032164	40	311	26	582
857	0.0033939	5	294	24	583
858	0.003457	0	302	25	604
859	0.0032014	1	288	21	575
860	0.0034914	8	289	22	570
861	0.0030206	27	311	19	595
862	0.0032238	32	303	24	574
863	0.0031836	8	300	27	592
864	0.0033449	31	322	28	613
865	0.0039042	1	310	22	619
866	0.0030928	26	310	26	594
867	0.0032859	5	310	29	615
868	0.0031512	9	304	27	599
869	0.0034685	12	312	27	612
870	0.0033906	11	303	26	595
871	0.0032385	7	278	21	549
872	0.0030762	26	314	25	602
873	0.003317	21	312	22	603
874	0.003212	16	298	20	580
875	0.0034354	23	310	24	597
876	0.003352	10	305	24	600
877	0.0034055	17	308	21	599
878	0.0039227	8	298	25	588
879	0.0033836	50	345	24	640
880	0.0033704	2	294	26	586
881	0.0031262	50	322	28	594
882	0.0036746	16	318	25	620
883	0.0035804	30	305	29	580
884	0.0033733	46	333	22	620
885	0.0034347	23	304	22	585
886	0.0033654	40	313	22	586
887	0.0033168	58	338	24	618
888	0.0033557	19	308	22	597
889	0.0031373	53	308	20	563
890	0.0031271	28	318	22	608
891	0.0031031	5	294	27	583
892	0.0033917	11	310	26	609
893	0.0032568	50	332	27	614
894	0.003292	4	306	23	608
895	0.0034177	34	307	23	580
896	0.0032418	32	311	23	590
897	0.0031558	2	287	20	572
898	0.0036297	15	305	19	595
899	0.0033012	33	317	28	601
900	0.003484	9	301	27	593
901	0.0034996	9	302	22	595
902	0.0033543	30	315	22	600
903	0.0034416	26	313	23	600
904	0.0031481	37	318	25	599
905	0.0033175	24	307	23	590
906	0.0034294	8	297	26	586
907	0.0033386	9	289	23	569
908	0.0031842	6	285	24	564
909	0.0033954	19	316	27	613
910	0.0033887	7	297	23	587
911	0.0034581	40	315	29	590
912	0.0032224	30	314	23	598
913	0.0035081	8	309	25	610
914	0.0032796	37	318	24	599
915	0.0042851	6	312	24	618
916	0.0033533	3	282	24	561
917	0.003357	7	292	27	577
918	0.0031478	14	294	26	574
919	0.0036645	44	331	23	618
920	0.0033218	6	289	21	572
921	0.0033569	2	298	22	594
922	0.0029862	0	279	22	558
923	0.0036868	4	297	29	590
924	0.0034099	5	292	25	579
925	0.0032965	21	310	23	599
926	0.0036343	7	299	22	591
927	0.0032534	13	298	22	583
928	0.0033748	15	304	23	593
929	0.0034915	24	326	27	628
930	0.003283	37	305	22	573
931	0.0032761	20	301	23	582
932	0.0033238	53	329	25	605
933	0.0032831	23	298	20	573
934	0.0032542	16	299	22	582
935	0.0033852	13	310	22	607
936	0.0037889	68	330	24	592
937	0.0033916	32	323	23	614
938	0.0038467	26	318	22	610
939	0.0034823	40	312	26	584
940	0.0031569	16	298	27	580
941	0.0032452	22	313	26	604
942	0.0037373	36	318	23	600
943	0.0035342	21	314	27	607
944	0.0034081	1	283	24	565
945	0.0034852	22	309	22	596
946	0.0034199	76	353	24	630
947	0.0034121	35	302	23	569
948	0.0032879	10	294	27	578
949	0.0033829	30	319	22	608
950	0.0040059	24	314	27	604
951	0.0031856	34	321	25	608
952	0.0036717	68	335	25	602
953	0.0033803	16	315	21	614
954	0.0033473	27	306	23	585
955	0.0032732	12	304	24	596
956	0.003049	9	303	24	597
957	0.0035184	14	296	21	578
958	0.003603	35	312	28	589
959	0.0034034	20	313	28	606
960	0.0031836	11	295	27	579
961	0.0034883	2	296	25	590
962	0.0038008	54	332	24	610
963	0.0034413	8	297	20	586
964	0.0035512	13	304	26	595
965	0.0033816	11	286	19	561
966	0.0035131	6	308	25	610
967	0.0034239	54	329	24	604
968	0.0033243	8	294	28	580
969	0.0036494	17	301	23	585
970	0.0033162	5	301	27	597
971	0.0035741	14	309	22	604
972	0.003265	4	296	23	588
973	0.0035834	66	324	25	582
974	0.0032769	40	315	25	590
975	0.0033605	23	304	28	585
976	0.0034501	20	298	20	576
977	0.003331	51	328	22	605
978	0.0032063	3	293	20	583
979	0.0037964	6	297	22	588
980	0.0032986	26	311	25	596
981	0.0033999	15	293	23	571
982	0.0035424	31	314	25	597
983	0.0036613	27	318	27	609
984	0.0033657	16	316	25	616
985	0.003478	6	296	25	586
986	0.0032987	28	311	24	594
987	0.0033981	21	306	20	591
988	0.0034019	20	303	27	586
989	0.0038613	8	292	22	576
990	0.0036872	35	322	24	609
991	0.0036061	80	362	26	644
992	0.0032899	71	328	24	585
993	0.0032923	4	300	23	596
994	0.0031183	62	328	26	594
995	0.003314	36	311	23	586
996	0.0035583	22	291	22	560
997	0.003231	42	318	22	594
998	0.0034313	8	318	25	628
999	0.0031917	23	310	27	597
mean	0.00336006	21.208	306.434	23.971	591.66

## Sheet: PolyMin_Bal
	time	SEq	Bal	Reg	Egal
0	0.0035754	17	316	24	615
1	0.0033231	38	320	22	602
2	0.0034125	28	303	25	578
3	0.0032261	40	307	21	574
4	0.0032945	1	297	22	593
5	0.0041528	28	322	20	616
6	0.0032917	1	295	22	589
7	0.0036632	1	307	22	613
8	0.003385	58	335	25	612
9	0.0033705	14	299	22	584
10	0.0032994	24	308	27	592
11	0.003219	13	306	22	599
12	0.0037987	8	313	27	618
13	0.0035039	23	317	28	611
14	0.0032606	6	300	19	594
15	0.0030981	28	313	26	598
16	0.0035982	53	328	27	603
17	0.003412	15	298	23	581
18	0.0033223	46	327	25	608
19	0.0035428	6	299	21	592
20	0.0031507	12	316	23	620
21	0.0032901	18	305	21	592
22	0.0032432	21	310	21	599
23	0.0032058	29	307	24	585
24	0.0033921	4	297	25	590
25	0.0031679	16	305	22	594
26	0.0034443	1	292	25	583
27	0.0034467	5	300	23	595
28	0.0032045	7	294	20	581
29	0.0029508	4	305	27	606
30	0.0033485	13	301	26	589
31	0.00317	2	293	23	584
32	0.0034408	14	306	25	598
33	0.0031842	26	311	21	596
34	0.0034988	47	337	25	627
35	0.0033302	18	298	23	578
36	0.0031932	29	303	25	577
37	0.0036791	19	305	25	591
38	0.0034307	25	304	28	583
39	0.0033387	16	305	23	594
40	0.0038638	14	297	25	580
41	0.0032016	71	327	24	583
42	0.0034947	39	321	26	603
43	0.0032808	2	294	26	586
44	0.0032994	13	315	28	617
45	0.0030743	4	292	21	580
46	0.003352	27	312	24	597
47	0.0033093	2	302	24	602
48	0.0032045	22	303	26	584
49	0.0031818	5	308	26	611
50	0.0033717	18	303	27	588
51	0.0032492	1	307	27	613
52	0.0031884	13	287	22	561
53	0.0032856	10	295	26	580
54	0.0033732	4	285	25	566
55	0.0030569	3	297	28	591
56	0.0032214	8	296	22	584
57	0.003172	7	312	24	617
58	0.0034276	6	290	19	574
59	0.0031548	9	296	21	583
60	0.0034218	23	306	23	589
61	0.0031158	28	327	27	626
62	0.0031354	11	292	20	573
63	0.0031403	5	293	27	581
64	0.0031807	30	300	23	570
65	0.0032725	26	304	20	582
66	0.0031775	0	298	23	596
67	0.0033523	43	322	22	601
68	0.0033661	4	294	23	584
69	0.0032291	25	298	27	571
70	0.0033283	40	311	24	582
71	0.0032005	17	303	23	589
72	0.0031054	7	300	27	593
73	0.0031694	12	304	28	596
74	0.0032411	36	331	27	626
75	0.003488	10	298	20	586
76	0.0031764	29	312	28	595
77	0.0031638	18	298	23	578
78	0.0031583	45	313	21	581
79	0.0033578	29	316	22	603
80	0.0034397	7	298	19	589
81	0.0033427	31	316	23	601
82	0.0035731	25	306	27	587
83	0.0036499	12	299	22	586
84	0.0034119	22	300	20	578
85	0.0034006	40	319	21	598
86	0.0033427	4	300	21	596
87	0.0034957	26	307	22	588
88	0.0031992	1	297	21	593
89	0.0032178	17	298	22	579
90	0.0031872	24	309	23	594
91	0.003208	20	308	25	596
92	0.0034904	53	320	22	587
93	0.0033047	6	300	22	594
94	0.0036048	39	315	25	591
95	0.0033054	28	302	21	576
96	0.0034043	29	292	20	555
97	0.0031927	21	310	25	599
98	0.0032584	7	294	24	581
99	0.0035	68	328	25	588
100	0.0032788	10	289	21	568
101	0.0034436	21	317	25	613
102	0.0032951	3	285	24	567
103	0.0037436	1	295	22	589
104	0.0032931	88	345	26	602
105	0.0031783	22	303	24	584
106	0.0035291	40	314	22	588
107	0.0032259	29	301	25	573
108	0.0035744	10	302	22	594
109	0.0036029	42	323	28	604
110	0.0032445	32	294	22	556
111	0.0031177	46	319	24	592
112	0.0033827	17	302	22	587
113	0.0032986	21	302	21	583
114	0.0034846	39	317	20	595
115	0.0034118	21	304	23	587
116	0.0032308	4	301	21	598
117	0.003224	26	313	28	600
118	0.0033696	6	297	27	588
119	0.0037118	13	312	24	611
120	0.0033433	58	324	23	590
121	0.0031484	8	288	21	568
122	0.0033236	32	302	23	572
123	0.0032923	36	316	20	596
124	0.0032494	14	305	26	596
125	0.0035041	31	314	20	597
126	0.0032358	16	295	24	574
127	0.0032602	4	297	25	590
128	0.0031002	1	287	21	573
129	0.0034362	26	315	23	604
130	0.00324	35	313	24	591
131	0.0031131	24	311	24	598
132	0.0032868	12	304	26	596
133	0.0031935	33	309	23	585
134	0.0031995	3	294	28	585
135	0.0031482	10	297	21	584
136	0.0035855	11	301	24	591
137	0.00329	11	309	24	607
138	0.0031763	18	307	23	596
139	0.0031627	27	300	29	573
140	0.0033885	8	306	26	604
141	0.0034446	10	296	25	582
142	0.003448	25	308	24	591
143	0.0033476	2	300	26	598
144	0.0030822	6	300	21	594
145	0.0033163	18	320	25	622
146	0.0035217	9	291	24	573
147	0.0029446	66	343	29	620
148	0.0034551	26	308	28	590
149	0.0031041	20	304	20	588
150	0.003556	41	325	21	609
151	0.0032857	17	298	21	579
152	0.0036251	14	297	20	580
153	0.0032714	19	299	22	579
154	0.0030945	36	316	24	596
155	0.0030665	7	295	24	583
156	0.0034426	24	314	29	604
157	0.0034535	5	291	23	577
158	0.0032485	20	309	26	598
159	0.0033564	17	297	22	577
160	0.0032579	25	301	22	577
161	0.0033115	68	331	23	594
162	0.0031133	12	299	25	586
163	0.0033441	63	333	21	603
164	0.0032844	16	304	26	592
165	0.0043478	59	332	26	605
166	0.0033128	20	290	19	560
167	0.0033618	0	293	24	586
168	0.003679	0	284	26	568
169	0.0031957	2	285	27	568
170	0.0034284	53	324	25	595
171	0.0030024	27	294	22	561
172	0.0034263	11	289	20	567
173	0.0031825	19	300	20	581
174	0.0033656	35	306	21	577
175	0.0033409	43	312	27	581
176	0.0031333	52	322	26	592
177	0.0033432	85	341	25	597
178	0.003386	8	306	23	604
179	0.0032428	18	306	21	594
180	0.0033768	96	351	28	606
181	0.00332	38	337	25	636
182	0.0032949	30	325	24	620
183	0.0032433	23	309	29	595
184	0.0034843	16	307	25	598
185	0.0033184	20	303	24	586
186	0.0034975	14	306	27	598
187	0.0033906	56	329	26	602
188	0.0035591	4	300	25	596
189	0.0034803	39	304	25	569
190	0.003268	1	285	23	569
191	0.0030684	3	291	25	579
192	0.0033207	17	304	25	591
193	0.0037969	2	298	28	594
194	0.0032129	4	294	24	584
195	0.0035244	16	325	24	634
196	0.0031485	37	317	24	597
197	0.0036989	35	319	28	603
198	0.0030116	16	314	24	612
199	0.0033727	72	337	27	602
200	0.0032424	32	314	25	596
201	0.003479	6	295	25	584
202	0.003361	13	294	29	575
203	0.0033566	5	302	23	599
204	0.0033619	15	310	23	605
205	0.003035	7	293	28	579
206	0.00337	7	304	27	601
207	0.0035034	32	318	24	604
208	0.0036102	47	330	26	613
209	0.0032543	27	318	25	609
210	0.0033277	12	306	26	600
211	0.0031403	4	302	26	600
212	0.0034838	16	299	21	582
213	0.0035419	2	295	25	588
214	0.0032993	0	299	29	598
215	0.0031976	6	317	23	628
216	0.0029222	24	296	29	568
217	0.0032509	45	329	29	613
218	0.0034402	23	302	23	581
219	0.0031561	28	302	29	576
220	0.0032075	14	302	21	590
221	0.0036048	27	317	25	607
222	0.0033559	11	297	23	583
223	0.0033657	0	289	25	578
224	0.0032074	14	309	25	604
225	0.0034077	35	317	25	599
226	0.0029496	9	311	29	613
227	0.002982	7	295	23	583
228	0.0033739	13	298	21	583
229	0.0034013	18	315	25	612
230	0.003686	19	306	24	593
231	0.0032083	65	333	28	601
232	0.0032971	22	298	23	574
233	0.0033981	17	306	22	595
234	0.0042338	40	327	24	614
235	0.0030651	1	296	21	591
236	0.0032662	13	324	23	635
237	0.0030719	5	300	22	595
238	0.0035088	2	289	19	576
239	0.0032748	12	303	24	594
240	0.0030279	27	304	27	581
241	0.0033835	30	315	25	600
242	0.0031318	7	317	27	627
243	0.0035657	1	310	23	619
244	0.0033179	35	316	24	597
245	0.0034437	0	300	25	600
246	0.0032477	3	296	22	589
247	0.0033891	20	312	26	604
248	0.0032886	21	299	20	577
249	0.0034841	22	300	24	578
250	0.0032446	11	294	23	577
251	0.003187	4	293	27	582
252	0.003365	4	288	26	572
253	0.0033644	16	291	22	566
254	0.0032947	25	303	24	581
255	0.0032886	0	300	26	600
256	0.0030585	9	292	23	575
257	0.0031983	36	313	28	590
258	0.0033727	14	296	29	578
259	0.0035394	44	324	22	604
260	0.0033112	31	314	28	597
261	0.003185	28	305	26	582
262	0.0032287	14	285	20	556
263	0.0029914	9	285	23	561
264	0.0031701	26	307	27	588
265	0.003417	3	301	26	599
266	0.0030692	14	301	26	588
267	0.0034595	20	313	24	606
268	0.0031934	8	304	26	600
269	0.0032033	34	301	20	568
270	0.0030916	37	324	26	611
271	0.0034986	10	288	22	566
272	0.0034964	12	297	26	582
273	0.0031074	47	322	25	597
274	0.0031465	18	298	27	578
275	0.003488	3	303	23	603
276	0.0033941	2	307	22	612
277	0.0034636	14	316	23	618
278	0.0034007	46	319	24	592
279	0.0029902	21	303	21	585
280	0.0032992	23	300	21	577
281	0.0037564	7	301	23	595
282	0.0031535	22	300	23	578
283	0.0032893	8	294	20	580
284	0.0035171	1	293	25	585
285	0.0033605	47	326	26	605
286	0.0034925	5	311	23	617
287	0.0035502	14	300	22	586
288	0.0030407	45	310	22	575
289	0.0032775	39	314	23	589
290	0.0034725	22	303	23	584
291	0.0031671	21	302	28	583
292	0.0032888	3	297	22	591
293	0.0030984	4	287	22	570
294	0.003117	70	334	24	598
295	0.0033938	9	315	24	621
296	0.0032512	7	294	25	581
297	0.0031902	2	288	24	574
298	0.0034462	3	304	21	605
299	0.0032466	38	305	25	572
300	0.0033872	1	281	20	561
301	0.003184	43	315	22	587
302	0.0033615	44	316	28	588
303	0.0034875	5	301	21	597
304	0.0033398	48	312	20	576
305	0.0035358	10	290	19	570
306	0.0032175	20	309	25	598
307	0.0031993	27	305	25	583
308	0.0030798	2	298	23	594
309	0.00327	17	291	26	565
310	0.0035012	10	288	21	566
311	0.0036337	17	299	27	581
312	0.0033005	20	320	24	620
313	0.0034105	34	309	23	584
314	0.0032019	28	305	23	582
315	0.0040325	47	318	26	589
316	0.0034653	5	299	22	593
317	0.0034177	9	298	19	587
318	0.0033504	3	291	22	579
319	0.0035557	31	308	24	585
320	0.0033621	51	330	25	609
321	0.0033294	17	309	27	601
322	0.0032842	1	291	23	581
323	0.0036411	4	293	20	582
324	0.0036895	4	309	24	614
325	0.0032741	7	302	22	597
326	0.003303	31	313	25	595
327	0.0031829	22	298	21	574
328	0.0033106	42	321	26	600
329	0.0033144	31	308	22	585
330	0.0034418	13	300	21	587
331	0.0032447	15	320	29	625
332	0.0030548	29	313	23	597
333	0.0032128	28	305	26	582
334	0.0034136	1	294	24	587
335	0.0035294	26	320	26	614
336	0.0032101	17	294	23	571
337	0.0031887	6	303	24	600
338	0.0031216	43	319	24	595
339	0.0036555	17	303	22	589
340	0.0035916	26	311	22	596
341	0.0032192	29	319	25	609
342	0.0034426	4	297	23	590
343	0.0036157	9	298	21	587
344	0.0033022	12	318	26	624
345	0.0034146	27	306	20	585
346	0.0033096	53	320	26	587
347	0.0035028	3	290	27	577
348	0.0032611	28	302	23	576
349	0.0032388	11	297	22	583
350	0.0035777	17	320	23	623
351	0.0033823	64	320	22	576
352	0.0032777	3	305	24	607
353	0.0033261	13	300	26	587
354	0.0033962	2	291	21	580
355	0.0031795	5	302	25	599
356	0.0032007	4	303	26	602
357	0.0033931	7	303	21	599
358	0.0031146	7	303	28	599
359	0.0032921	4	300	25	596
360	0.0031676	3	290	26	577
361	0.0033141	7	290	24	573
362	0.0033866	10	290	26	570
363	0.0034392	25	298	23	571
364	0.0033018	56	317	24	578
365	0.0032942	11	303	23	595
366	0.0030952	3	289	21	575
367	0.0033788	47	328	26	609
368	0.0031254	28	298	24	568
369	0.0031712	39	322	28	605
370	0.0034946	44	320	22	596
371	0.003279	9	296	25	583
372	0.0029486	6	294	20	582
373	0.0033469	40	324	28	608
374	0.0041237	55	323	23	591
375	0.0033701	16	296	27	576
376	0.0032101	4	303	23	602
377	0.0032918	13	308	27	603
378	0.0030007	0	297	28	594
379	0.0035235	25	322	23	619
380	0.0036815	33	314	26	595
381	0.0035258	25	297	24	569
382	0.003461	8	301	23	594
383	0.0034516	7	301	27	595
384	0.0032074	41	315	23	589
385	0.0033363	24	314	22	604
386	0.0033721	61	316	21	571
387	0.0034254	28	312	23	596
388	0.0032642	30	305	23	580
389	0.0031819	36	308	26	580
390	0.0031656	7	306	22	605
391	0.0035609	7	302	27	597
392	0.003563	54	327	27	600
393	0.0032276	23	308	25	593
394	0.0033669	50	324	23	598
395	0.0029137	21	292	25	563
396	0.0035227	18	302	24	586
397	0.003436	33	306	29	579
398	0.0033793	0	302	26	604
399	0.0032614	20	301	22	582
400	0.0034219	14	294	25	574
401	0.0031096	37	317	23	597
402	0.0033801	25	307	24	589
403	0.0034603	11	321	29	631
404	0.0035249	9	308	22	607
405	0.0031908	19	294	25	569
406	0.0035538	52	331	24	610
407	0.0030514	97	353	28	609
408	0.0031612	19	317	29	615
409	0.0032553	8	294	22	580
410	0.003335	21	300	22	579
411	0.0033483	26	321	27	616
412	0.0033857	54	325	26	596
413	0.0034223	9	301	22	593
414	0.0038879	34	312	22	590
415	0.0032771	1	283	22	565
416	0.0033941	21	308	24	595
417	0.003312	38	321	23	604
418	0.0032436	1	308	25	615
419	0.0033442	5	302	25	599
420	0.0030874	39	319	22	599
421	0.0031916	18	310	25	602
422	0.0032669	14	296	25	578
423	0.0032036	18	309	24	600
424	0.0032541	37	332	27	627
425	0.0037419	35	317	24	599
426	0.0032359	5	287	22	569
427	0.0033564	12	309	24	606
428	0.0034516	29	310	27	591
429	0.0036759	15	305	25	595
430	0.0033477	21	288	22	555
431	0.0031645	8	304	25	600
432	0.0033972	47	324	26	601
433	0.0033112	27	312	26	597
434	0.0034127	7	312	27	617
435	0.0033048	35	317	24	599
436	0.0032823	38	315	22	592
437	0.0034038	13	300	22	587
438	0.0031801	18	300	28	582
439	0.0032773	3	289	23	575
440	0.0039107	32	322	28	612
441	0.0033462	54	330	22	606
442	0.0033289	15	309	24	603
443	0.0032212	45	305	23	565
444	0.0033142	11	294	27	577
445	0.0031837	41	310	25	579
446	0.0034996	17	319	27	621
447	0.0034874	28	321	29	614
448	0.0031955	41	317	25	593
449	0.0034132	2	297	28	592
450	0.0033238	6	301	26	596
451	0.0034782	13	288	20	563
452	0.0033861	11	313	25	615
453	0.0033883	4	316	27	628
454	0.003278	10	296	21	582
455	0.0034088	37	325	29	613
456	0.0031038	1	289	24	577
457	0.0031476	24	310	24	596
458	0.0032971	3	309	24	615
459	0.0031574	7	307	25	607
460	0.0031933	37	315	25	593
461	0.0032167	9	292	23	575
462	0.0033001	7	295	22	583
463	0.0029977	44	316	22	588
464	0.0033962	44	320	26	596
465	0.0032326	75	329	25	583
466	0.0034248	6	300	19	594
467	0.0032445	42	302	23	562
468	0.0033804	9	303	24	597
469	0.0029891	19	290	22	561
470	0.0032307	46	323	27	600
471	0.003253	19	298	23	577
472	0.0032388	40	303	25	566
473	0.0032657	45	322	29	599
474	0.0034073	28	318	23	608
475	0.0031397	10	285	22	560
476	0.0030014	1	291	23	581
477	0.0034832	32	307	24	582
478	0.0030795	26	314	26	602
479	0.0036142	64	329	21	594
480	0.0034594	41	309	19	577
481	0.0032853	10	296	22	582
482	0.0032285	34	318	28	602
483	0.0034306	14	305	22	596
484	0.0033287	5	281	23	557
485	0.0033135	41	322	24	603
486	0.0033066	5	296	24	587
487	0.0033217	14	296	21	578
488	0.0033753	21	309	26	597
489	0.003066	12	304	26	596
490	0.0032494	25	312	23	599
491	0.0033632	48	317	25	586
492	0.0032555	22	311	26	600
493	0.0033456	48	322	22	596
494	0.003517	4	296	26	588
495	0.0032255	27	298	24	569
496	0.0033656	14	304	22	594
497	0.003415	14	313	25	612
498	0.0031563	42	316	25	590
499	0.0031253	13	303	21	593
500	0.003429	19	306	22	593
501	0.0032273	17	303	25	589
502	0.0034326	26	314	25	602
503	0.003146	3	300	24	597
504	0.0034632	29	313	25	597
505	0.0031774	4	293	20	582
506	0.0035174	18	308	25	598
507	0.0034111	53	314	24	575
508	0.0035912	43	323	25	603
509	0.0031984	44	331	26	618
510	0.0033969	43	312	23	581
511	0.0035951	14	299	27	584
512	0.0033336	4	287	26	570
513	0.0032498	37	306	23	575
514	0.0033309	13	310	22	607
515	0.0031467	27	296	23	565
516	0.0039186	14	286	22	558
517	0.0033385	3	295	20	587
518	0.003351	47	325	23	603
519	0.002918	27	299	29	571
520	0.0034359	60	327	23	594
521	0.0034274	47	313	23	579
522	0.0032644	55	321	25	587
523	0.0035384	26	307	27	588
524	0.0036003	43	332	28	621
525	0.003198	14	295	24	576
526	0.003113	22	306	24	590
527	0.0032115	26	313	25	600
528	0.0033214	22	299	25	576
529	0.0033653	3	287	21	571
530	0.0039802	16	304	25	592
531	0.003625	12	299	21	586
532	0.0033447	4	286	21	568
533	0.0032579	1	301	26	601
534	0.0031444	3	292	24	581
535	0.0032564	2	296	22	590
536	0.0034537	0	284	20	568
537	0.0029821	10	302	25	594
538	0.0036816	26	322	29	618
539	0.0033456	2	300	26	598
540	0.0031257	2	297	26	592
541	0.0034192	20	292	22	564
542	0.0034838	23	314	22	605
543	0.0042157	12	305	23	598
544	0.0030222	20	305	24	590
545	0.0035174	23	320	27	617
546	0.0034333	14	295	23	576
547	0.0033484	43	316	27	589
548	0.0038378	4	303	26	602
549	0.0032067	43	315	22	587
550	0.0030617	32	315	28	598
551	0.0032817	30	313	24	596
552	0.0032439	21	302	25	583
553	0.0035592	13	298	21	583
554	0.0030616	15	313	25	611
555	0.0034336	5	301	26	597
556	0.0033846	20	305	23	590
557	0.0031833	5	295	22	585
558	0.0031397	24	308	26	592
559	0.0034555	10	301	26	592
560	0.0034309	41	316	24	591
561	0.0032799	5	308	25	611
562	0.0035749	42	314	26	586
563	0.0032948	1	295	24	589
564	0.0034663	29	321	25	613
565	0.0033038	46	324	23	602
566	0.0033661	1	295	23	589
567	0.0032627	7	292	22	577
568	0.0032474	8	311	24	614
569	0.0031871	48	330	25	612
570	0.0033122	30	306	26	582
571	0.0031495	12	310	20	608
572	0.003238	37	321	27	605
573	0.0035005	31	305	22	579
574	0.0032245	11	297	24	583
575	0.0036933	31	304	23	577
576	0.0034144	33	319	24	605
577	0.0032465	25	305	29	585
578	0.0032388	15	302	25	589
579	0.0035417	1	292	23	583
580	0.0033601	11	302	24	593
581	0.0037379	56	331	23	606
582	0.0033427	13	298	27	583
583	0.0031289	2	305	29	608
584	0.0033276	1	312	24	623
585	0.0031992	37	322	24	607
586	0.0036813	6	305	23	604
587	0.0035223	27	309	23	591
588	0.0032099	38	306	23	574
589	0.0034002	8	288	19	568
590	0.0033358	10	299	29	588
591	0.0032435	24	307	29	590
592	0.0036234	8	301	23	594
593	0.0032793	24	308	23	592
594	0.003237	30	312	27	594
595	0.0031673	34	305	22	576
596	0.0036143	43	331	20	619
597	0.003336	15	305	25	595
598	0.0032243	26	312	22	598
599	0.0034882	2	283	24	564
600	0.0031912	24	301	24	578
601	0.0035731	40	325	27	610
602	0.003508	23	312	23	601
603	0.0032852	57	326	25	595
604	0.0033864	9	307	21	605
605	0.0033373	22	310	27	598
606	0.0031585	28	307	21	586
607	0.0033313	23	301	25	579
608	0.0038706	23	299	23	575
609	0.003222	25	299	22	573
610	0.0034445	28	306	26	584
611	0.0038173	21	316	23	611
612	0.0032625	7	310	24	613
613	0.0034059	25	327	25	629
614	0.0030666	47	323	26	599
615	0.0034965	21	303	24	585
616	0.0031388	40	322	25	604
617	0.0031116	8	298	21	588
618	0.0032801	26	320	23	614
619	0.0037086	17	308	25	599
620	0.0035913	45	321	23	597
621	0.0034089	4	306	26	608
622	0.0036554	22	316	24	610
623	0.0030951	0	291	20	582
624	0.0032394	2	285	24	568
625	0.0035268	32	303	27	574
626	0.0032614	13	292	22	571
627	0.0034878	9	300	24	591
628	0.003389	6	307	23	608
629	0.0029762	12	299	24	586
630	0.0033044	9	299	23	589
631	0.003288	29	304	26	579
632	0.0041991	25	307	21	589
633	0.0030985	7	295	22	583
634	0.0035879	26	298	21	570
635	0.0034859	7	299	23	591
636	0.00315	12	294	28	576
637	0.0036657	29	294	21	559
638	0.003256	0	287	22	574
639	0.0034722	16	305	21	594
640	0.0032988	5	290	25	575
641	0.0033662	14	298	22	582
642	0.0035084	72	333	27	594
643	0.0033807	19	301	24	583
644	0.0033534	50	316	22	582
645	0.0034816	7	302	22	597
646	0.0035024	7	291	24	575
647	0.0033429	3	295	20	587
648	0.0034957	51	317	23	583
649	0.0035674	30	313	22	596
650	0.0035319	8	295	22	582
651	0.0033693	8	296	24	584
652	0.0035282	24	301	28	578
653	0.0036098	22	319	29	616
654	0.0031936	10	302	24	594
655	0.0032975	3	305	22	607
656	0.0033286	10	305	23	600
657	0.003289	5	299	22	593
658	0.0031706	1	303	25	605
659	0.0033288	29	311	23	593
660	0.00349	13	314	22	615
661	0.0034118	22	311	29	600
662	0.0035902	10	312	27	614
663	0.0031429	55	329	28	603
664	0.0031551	6	297	26	588
665	0.0032264	4	290	23	576
666	0.0030548	5	299	25	593
667	0.0033204	52	302	28	552
668	0.0033053	10	310	23	610
669	0.0031374	1	286	25	571
670	0.0036048	32	306	26	580
671	0.0035764	1	296	27	591
672	0.0032261	5	309	25	613
673	0.0033882	20	309	22	598
674	0.0031961	26	307	23	588
675	0.0033872	8	305	23	602
676	0.0036722	48	318	21	588
677	0.0031203	62	333	26	604
678	0.0033287	9	303	29	597
679	0.003171	12	293	23	574
680	0.0033738	13	314	24	615
681	0.0032779	11	289	27	567
682	0.0037549	3	294	21	585
683	0.0032672	41	312	28	583
684	0.0032231	50	319	26	588
685	0.0031751	2	292	24	582
686	0.0031531	34	309	24	584
687	0.0033274	39	311	25	583
688	0.003263	8	289	23	570
689	0.0033469	7	299	24	591
690	0.0030494	1	292	27	583
691	0.0036202	28	310	22	592
692	0.0035731	6	313	26	620
693	0.0032752	21	314	24	607
694	0.0041948	6	311	24	616
695	0.003243	21	307	21	593
696	0.0034323	27	303	24	579
697	0.0033885	11	304	27	597
698	0.0035973	30	302	21	574
699	0.0035154	5	297	24	589
700	0.0030394	36	308	22	580
701	0.0034774	3	294	23	585
702	0.0030567	40	338	28	636
703	0.0035148	6	297	26	588
704	0.0032669	1	290	20	579
705	0.0032827	1	299	24	597
706	0.003221	22	303	29	584
707	0.0032084	45	308	19	571
708	0.0031906	4	307	24	610
709	0.0034488	21	303	23	585
710	0.0032187	41	314	23	587
711	0.0036545	14	316	25	618
712	0.0032407	33	316	28	599
713	0.0033573	9	295	22	581
714	0.0033009	48	321	26	594
715	0.0034689	16	302	23	588
716	0.0038263	12	287	25	562
717	0.0032279	13	305	25	597
718	0.0032324	22	321	25	620
719	0.0034541	6	296	25	586
720	0.0032405	9	301	22	593
721	0.0034808	60	319	24	578
722	0.0030844	43	319	24	595
723	0.0033045	24	300	22	576
724	0.0033952	2	299	22	596
725	0.0032946	10	288	21	566
726	0.0037664	41	320	22	599
727	0.0031083	9	296	22	583
728	0.0033483	18	295	20	572
729	0.0034559	39	298	25	557
730	0.0030153	8	301	23	594
731	0.003352	27	310	24	593
732	0.0032238	14	297	21	580
733	0.0033793	11	290	22	569
734	0.0034976	7	301	24	595
735	0.0033955	0	296	25	592
736	0.0033868	16	314	23	612
737	0.0051437	11	302	27	593
738	0.0034346	37	309	20	581
739	0.0036716	4	303	22	602
740	0.003611	6	285	24	564
741	0.0031722	11	291	28	571
742	0.0035326	28	320	22	612
743	0.0029814	30	322	29	614
744	0.0034211	68	324	23	580
745	0.0031824	16	298	23	580
746	0.0036848	16	312	25	608
747	0.0031956	10	300	28	590
748	0.0034198	7	303	20	599
749	0.003447	14	302	23	590
750	0.0034933	36	320	24	604
751	0.0034288	3	300	22	597
752	0.00303	28	294	22	560
753	0.0031253	26	299	23	572
754	0.0033146	16	305	25	594
755	0.0039588	22	302	27	582
756	0.0030664	5	287	29	569
757	0.0034722	6	304	21	602
758	0.0033642	52	332	23	612
759	0.0031391	6	300	24	594
760	0.0034275	4	298	24	592
761	0.0035417	68	329	21	590
762	0.0034509	47	325	24	603
763	0.0032441	3	304	24	605
764	0.0034724	75	342	20	609
765	0.0042245	22	300	22	578
766	0.0032054	18	304	24	590
767	0.0032461	1	288	20	575
768	0.0033993	39	310	23	581
769	0.0031689	3	287	23	571
770	0.0032478	26	313	24	600
771	0.0035316	44	317	28	590
772	0.0032176	26	311	25	596
773	0.0032517	12	301	29	590
774	0.0032384	11	296	22	581
775	0.0031236	21	304	28	587
776	0.0035797	12	292	23	572
777	0.003304	42	310	26	578
778	0.0035235	71	332	22	593
779	0.0033678	12	305	24	598
780	0.0032872	0	299	23	598
781	0.0033106	47	326	25	605
782	0.0029799	45	319	24	593
783	0.003108	23	313	25	603
784	0.0031079	6	283	22	560
785	0.0032354	35	310	24	585
786	0.0033319	14	310	21	606
787	0.0038503	17	292	22	567
788	0.0035263	30	310	24	590
789	0.0033916	7	286	27	565
790	0.0034124	26	306	24	586
791	0.0033867	16	292	20	568
792	0.0032742	28	320	25	612
793	0.0034632	50	326	22	602
794	0.0030517	24	300	26	576
795	0.0031123	15	300	20	585
796	0.0034038	22	313	28	604
797	0.003341	35	326	24	617
798	0.0033476	23	313	24	603
799	0.0032911	13	303	22	593
800	0.003263	18	300	25	582
801	0.0036438	1	287	22	573
802	0.0032054	5	298	21	591
803	0.0033265	33	306	21	579
804	0.003268	23	313	22	603
805	0.0029263	32	324	27	616
806	0.0033577	9	306	21	603
807	0.0033467	9	300	24	591
808	0.0035782	37	311	24	585
809	0.0033349	21	304	23	587
810	0.0031555	59	326	23	593
811	0.0033306	4	305	24	606
812	0.0034912	36	319	28	602
813	0.0031738	15	290	28	565
814	0.0033936	4	297	22	590
815	0.0033488	32	321	26	610
816	0.0034654	3	290	20	577
817	0.0031438	1	286	21	571
818	0.0032855	19	303	29	587
819	0.0031979	19	296	22	573
820	0.0034487	8	285	24	562
821	0.003436	2	291	22	580
822	0.0032781	7	305	25	603
823	0.0032541	8	317	25	626
824	0.0033029	29	320	25	611
825	0.0037819	27	314	22	601
826	0.0032318	4	292	24	580
827	0.0033305	9	291	20	573
828	0.0031622	16	310	22	604
829	0.0032957	35	317	26	599
830	0.0035475	23	314	25	605
831	0.0031644	16	318	22	620
832	0.0033419	18	291	25	564
833	0.0029573	38	317	26	596
834	0.0030527	39	311	24	583
835	0.0031665	1	300	23	599
836	0.0032904	30	311	22	592
837	0.0037839	24	310	29	596
838	0.0032752	7	286	26	565
839	0.0034463	54	323	26	592
840	0.0033601	11	302	29	593
841	0.0034428	1	297	21	593
842	0.0032298	18	306	24	594
843	0.0034472	16	290	24	564
844	0.0031029	31	310	26	589
845	0.0030027	16	306	25	596
846	0.0036243	16	296	23	576
847	0.0034499	18	296	21	574
848	0.0031321	11	292	24	573
849	0.0034915	5	290	27	575
850	0.0030488	13	286	19	559
851	0.0033262	44	324	24	604
852	0.0032496	7	295	24	583
853	0.0036267	31	312	20	593
854	0.0034738	12	302	22	592
855	0.0033996	1	293	20	585
856	0.0032568	40	311	26	582
857	0.0032441	5	294	24	583
858	0.0032787	0	302	25	604
859	0.0031652	1	288	21	575
860	0.0034156	8	289	22	570
861	0.0032254	27	311	19	595
862	0.0030594	32	303	24	574
863	0.0032048	8	300	27	592
864	0.0034328	31	322	28	613
865	0.0034559	1	310	22	619
866	0.0032876	26	310	26	594
867	0.0031421	5	310	29	615
868	0.0034064	9	304	27	599
869	0.0033233	12	312	27	612
870	0.0033259	11	303	26	595
871	0.0035053	7	278	21	549
872	0.0030274	26	314	25	602
873	0.0032925	21	312	22	603
874	0.0032776	16	298	20	580
875	0.0037364	23	310	24	597
876	0.0035905	10	305	24	600
877	0.0035293	17	308	21	599
878	0.0034578	8	298	25	588
879	0.0034743	50	345	24	640
880	0.003755	2	294	26	586
881	0.0032463	50	322	28	594
882	0.0038527	16	318	25	620
883	0.0034333	30	305	29	580
884	0.0037701	53	332	25	611
885	0.003435	23	304	22	585
886	0.003386	40	313	22	586
887	0.0032857	58	338	24	618
888	0.003334	19	308	22	597
889	0.0032106	53	308	20	563
890	0.0031069	28	318	22	608
891	0.0031454	5	294	27	583
892	0.0031565	11	310	26	609
893	0.0032951	50	332	27	614
894	0.0035665	4	306	23	608
895	0.003434	34	307	23	580
896	0.0033492	32	311	23	590
897	0.0031453	2	287	20	572
898	0.0035843	19	303	22	587
899	0.003339	33	317	28	601
900	0.0034291	9	301	27	593
901	0.0038532	9	302	22	595
902	0.0033826	30	315	22	600
903	0.0032724	26	313	23	600
904	0.0032851	37	318	25	599
905	0.0034121	24	307	23	590
906	0.0033149	8	297	26	586
907	0.0033775	9	289	23	569
908	0.003326	6	285	24	564
909	0.003526	19	316	27	613
910	0.0035826	7	297	23	587
911	0.0032294	40	315	29	590
912	0.0031998	30	314	23	598
913	0.0033304	8	309	25	610
914	0.0032522	37	318	24	599
915	0.0039386	6	312	24	618
916	0.0033097	3	282	24	561
917	0.0034386	7	292	27	577
918	0.0033082	14	294	26	574
919	0.0038071	44	324	25	604
920	0.003147	6	289	21	572
921	0.0035052	2	298	22	594
922	0.0031856	0	279	22	558
923	0.0034239	4	297	29	590
924	0.0031606	5	292	25	579
925	0.0033145	21	310	23	599
926	0.0035784	7	299	22	591
927	0.0034765	13	298	22	583
928	0.0033087	15	304	23	593
929	0.0032871	24	326	27	628
930	0.0032499	37	305	22	573
931	0.0034076	20	301	23	582
932	0.0035609	53	329	25	605
933	0.0033494	23	298	20	573
934	0.003448	16	299	22	582
935	0.0033942	13	310	22	607
936	0.0033941	68	330	24	592
937	0.0031698	32	323	23	614
938	0.0036378	26	318	22	610
939	0.0034688	40	312	26	584
940	0.0031418	16	298	27	580
941	0.0032891	22	313	26	604
942	0.0034328	36	318	23	600
943	0.0034494	21	314	27	607
944	0.0033717	1	283	24	565
945	0.0033139	22	309	22	596
946	0.0034214	77	342	29	607
947	0.003565	35	302	23	569
948	0.0031718	10	294	27	578
949	0.0032549	34	316	23	598
950	0.0033153	32	305	29	578
951	0.0031534	34	321	25	608
952	0.0033232	68	335	25	602
953	0.0036578	16	315	21	614
954	0.0033835	27	306	23	585
955	0.0032446	12	304	24	596
956	0.0032485	9	303	24	597
957	0.0034503	14	296	21	578
958	0.0033967	35	312	28	589
959	0.0034182	20	313	28	606
960	0.0031125	11	295	27	579
961	0.0034914	2	296	25	590
962	0.0036452	54	332	24	610
963	0.0037288	8	297	20	586
964	0.0037991	13	304	26	595
965	0.0034268	11	286	19	561
966	0.0036958	6	308	25	610
967	0.0034422	54	329	24	604
968	0.003333	8	294	28	580
969	0.0033196	17	301	23	585
970	0.003486	5	301	27	597
971	0.0036925	14	309	22	604
972	0.003395	4	296	23	588
973	0.0035476	66	324	25	582
974	0.0035025	40	315	25	590
975	0.003392	23	304	28	585
976	0.0033647	20	298	20	576
977	0.0033454	51	328	22	605
978	0.0033005	3	293	20	583
979	0.0033894	6	297	22	588
980	0.0035143	26	311	25	596
981	0.0035495	15	293	23	571
982	0.0035413	31	314	25	597
983	0.0038797	27	318	27	609
984	0.0034018	16	316	25	616
985	0.0034168	6	296	25	586
986	0.0032106	28	311	24	594
987	0.0034532	21	306	20	591
988	0.0036981	20	303	27	586
989	0.0034065	8	292	22	576
990	0.0035621	35	322	24	609
991	0.0038573	84	351	27	618
992	0.0034268	71	328	24	585
993	0.0034417	4	300	23	596
994	0.0029761	62	328	26	594
995	0.0033834	36	311	23	586
996	0.0034558	22	291	22	560
997	0.0037223	42	318	22	594
998	0.0032331	8	318	25	628
999	0.0033627	38	309	29	580
mean	0.00335245	21.395	306.282	24.026	591.169

## Sheet: DACC_D
	time	SEq	Bal	Reg	Egal
0	0.0010933	30	319	24	608
1	0.0010383	20	318	29	616
2	0.000978	28	303	25	578
3	0.0010163	115	358	29	601
4	0.0010118	75	337	25	599
5	0.0010346	16	322	22	628
6	0.001017	44	317	23	590
7	0.0010862	33	320	23	607
8	0.0011679	32	322	25	612
9	0.0009474	5	297	22	589
10	0.001155	9	306	27	603
11	0.0010878	59	334	24	609
12	0.0010688	39	331	27	623
13	0.0010242	23	317	28	611
14	0.0010439	24	311	19	598
15	0.0009936	15	307	26	599
16	0.0015216	45	325	27	605
17	0.0009503	88	345	28	602
18	0.0009999	89	356	28	623
19	0.0010697	107	356	26	605
20	0.0010468	12	316	23	620
21	0.0010062	18	305	21	592
22	0.0012569	43	315	21	587
23	0.000919	84	341	25	598
24	0.0009081	89	342	26	595
25	0.0010577	2	300	22	598
26	0.0009789	20	302	25	584
27	0.0009969	5	300	23	595
28	0.0009596	88	352	27	616
29	0.0011649	4	305	27	606
30	0.0010362	13	301	26	589
31	0.0014053	80	332	25	584
32	0.0010041	90	351	27	612
33	0.0010465	46	319	21	592
34	0.0012959	1	316	25	631
35	0.0009689	18	298	23	578
36	0.0010395	7	294	25	581
37	0.0011779	2	301	25	600
38	0.0010985	11	303	29	595
39	0.0010215	62	342	23	622
40	0.0010158	4	294	25	584
41	0.0010591	94	348	29	602
42	0.0015875	107	373	28	639
43	0.000976	49	314	26	579
44	0.0010262	65	345	28	625
45	0.0011136	19	300	21	581
46	0.001145	12	306	28	600
47	0.0010337	8	304	24	600
48	0.0010098	22	303	26	584
49	0.0010725	17	313	26	609
50	0.0011496	3	302	27	601
51	0.0010632	1	307	27	613
52	0.0010447	23	299	26	575
53	0.0009378	67	329	28	591
54	0.00096	32	304	25	576
55	0.0010975	13	302	28	591
56	0.0009777	5	297	22	589
57	0.0010907	7	312	24	617
58	0.0010368	6	292	19	578
59	0.0009233	9	296	21	583
60	0.0009402	74	337	26	600
61	0.001057	42	334	23	626
62	0.0009832	11	292	20	573
63	0.0009958	25	308	27	591
64	0.0009805	5	293	24	581
65	0.0009375	0	289	20	578
66	0.0010909	10	301	26	592
67	0.0010367	144	395	27	646
68	0.0010483	4	294	23	584
69	0.0010099	4	289	27	574
70	0.0010496	6	296	24	586
71	0.0010975	13	302	23	591
72	0.00101	54	330	29	606
73	0.0010517	16	312	29	608
74	0.0010636	6	319	27	632
75	0.001037	13	303	25	593
76	0.0011369	48	325	28	602
77	0.0009963	12	299	29	586
78	0.001099	17	301	24	585
79	0.001196	23	317	26	611
80	0.0009827	12	303	22	594
81	0.0010469	73	335	23	597
82	0.0009277	73	326	29	579
83	0.0009782	104	355	27	606
84	0.0009656	13	296	20	579
85	0.001085	20	307	21	594
86	0.0010695	4	309	22	614
87	0.0010037	31	313	22	595
88	0.001035	15	305	21	595
89	0.0010303	56	315	29	574
90	0.0010201	1	299	24	597
91	0.0010459	12	304	25	596
92	0.0011677	53	320	22	587
93	0.0010525	33	321	26	609
94	0.0010246	12	305	25	598
95	0.0009374	58	321	23	584
96	0.0009461	22	290	20	558
97	0.001094	7	303	25	599
98	0.0010106	15	298	24	581
99	0.000938	56	324	25	592
100	0.0008903	23	296	21	569
101	0.001047	11	315	25	619
102	0.0011408	22	291	26	560
103	0.0009279	73	340	27	607
104	0.0010339	12	308	27	604
105	0.0009797	22	303	24	584
106	0.0009869	106	362	28	618
107	0.0009101	93	345	26	597
108	0.0010052	5	305	19	605
109	0.0010165	89	347	29	605
110	0.0009994	12	288	29	564
111	0.0010724	15	309	24	603
112	0.001133	44	320	29	596
113	0.0010183	5	299	24	593
114	0.0011128	24	310	20	596
115	0.0012222	28	310	27	592
116	0.0011061	26	312	21	598
117	0.0010471	18	309	28	600
118	0.000939	101	362	27	623
119	0.0011741	1	309	24	617
120	0.0009529	80	340	23	600
121	0.0008777	57	318	21	579
122	0.0010751	9	293	23	577
123	0.001003	81	345	28	609
124	0.0011125	49	326	26	603
125	0.0010396	31	314	20	597
126	0.0010779	56	317	29	578
127	0.0010157	43	315	26	587
128	0.0010119	1	287	21	573
129	0.0011197	23	316	23	609
130	0.0010616	57	334	24	611
131	0.0011134	24	311	24	598
132	0.0010966	12	304	26	596
133	0.001027	29	314	23	599
134	0.0009721	3	294	28	585
135	0.0010249	20	302	21	584
136	0.0012142	66	338	24	610
137	0.0009761	87	352	29	617
138	0.0010388	103	372	28	641
139	0.0010947	38	311	26	584
140	0.0010603	8	306	26	604
141	0.0009586	19	303	25	587
142	0.0011342	39	326	25	613
143	0.0009381	78	345	25	612
144	0.000968	58	327	23	596
145	0.0011502	30	325	28	620
146	0.0010093	9	291	24	573
147	0.0012465	66	343	29	620
148	0.0010131	1	302	26	603
149	0.0010013	20	304	20	588
150	0.0010561	71	341	21	611
151	0.0009323	87	352	29	617
152	0.0009755	110	358	29	606
153	0.0009589	6	293	22	580
154	0.001079	24	313	24	602
155	0.0010012	7	295	24	583
156	0.0010116	22	316	26	610
157	0.0009895	4	297	23	590
158	0.0010879	59	331	26	603
159	0.0009776	53	319	24	585
160	0.0010957	51	319	22	587
161	0.0011074	2	302	25	602
162	0.0009893	12	299	25	586
163	0.0010171	84	349	28	614
164	0.0009907	32	314	26	596
165	0.0010681	16	314	29	612
166	0.0009417	16	293	19	570
167	0.0010319	26	308	24	590
168	0.0009609	134	376	29	618
169	0.0009894	2	285	27	568
170	0.000937	53	324	25	595
171	0.0009928	27	294	22	561
172	0.0009625	39	309	20	579
173	0.0011366	19	300	20	581
174	0.0009783	11	295	21	579
175	0.0010608	17	300	22	583
176	0.0010369	52	322	26	592
177	0.0010776	11	312	28	613
178	0.0009826	8	306	23	604
179	0.0010077	74	347	29	620
180	0.0012294	18	315	28	612
181	0.0011023	58	333	27	608
182	0.0010619	13	319	24	625
183	0.0010599	12	304	29	596
184	0.0010924	4	304	25	604
185	0.0010008	63	330	24	597
186	0.0009537	9	306	25	603
187	0.0010259	32	318	27	604
188	0.0009321	118	359	26	600
189	0.001111	7	294	25	581
190	0.0009965	14	292	23	570
191	0.0011609	3	291	25	579
192	0.0011386	17	304	25	591
193	0.0011824	2	298	28	594
194	0.0010379	25	305	24	585
195	0.0011292	10	323	29	636
196	0.0009433	37	317	24	597
197	0.001193	35	319	28	603
198	0.0010382	16	314	24	612
199	0.0009866	43	331	27	619
200	0.0010928	24	316	24	608
201	0.0010074	6	295	25	584
202	0.0009256	13	294	29	575
203	0.0011038	6	299	27	592
204	0.0010567	67	344	29	621
205	0.0010768	22	303	28	584
206	0.0010689	33	322	26	611
207	0.0010127	6	305	24	604
208	0.001127	32	323	27	614
209	0.0010892	36	321	27	606
210	0.0009471	36	322	26	608
211	0.0010208	4	302	26	600
212	0.0011009	30	307	21	584
213	0.0009652	12	296	25	580
214	0.0010125	0	299	29	598
215	0.0010659	22	321	27	620
216	0.0009542	24	296	29	568
217	0.0013253	17	316	29	615
218	0.0010367	89	337	25	585
219	0.0010878	28	302	29	576
220	0.0009517	14	302	21	590
221	0.000988	6	307	25	608
222	0.0009718	80	345	27	610
223	0.000989	0	289	25	578
224	0.0010035	19	312	25	605
225	0.001021	65	340	24	615
226	0.0012366	9	311	29	613
227	0.000991	7	295	23	583
228	0.0010518	13	298	21	583
229	0.0011017	3	309	25	615
230	0.0012561	19	306	24	593
231	0.0011455	31	319	28	607
232	0.0010605	82	337	28	592
233	0.0010242	17	306	22	595
234	0.001153	19	320	24	621
235	0.0010373	30	318	27	606
236	0.0011891	13	324	23	635
237	0.0010795	22	310	23	598
238	0.0009515	144	387	29	630
239	0.0010585	12	303	24	594
240	0.0010297	27	304	27	581
241	0.000988	126	377	27	628
242	0.0012767	7	317	27	627
243	0.001065	55	338	29	621
244	0.0009509	58	329	24	600
245	0.0009725	2	307	25	612
246	0.0010479	3	296	22	589
247	0.001044	4	304	26	604
248	0.0009599	83	335	23	587
249	0.0010421	32	308	24	584
250	0.0022389	0	289	23	578
251	0.0009666	55	326	27	597
252	0.0010381	14	295	26	576
253	0.0009853	43	304	22	565
254	0.0009843	128	377	27	626
255	0.0010315	24	314	28	604
256	0.0010189	62	328	29	594
257	0.0009971	50	325	27	600
258	0.0010325	14	296	29	578
259	0.000963	77	342	22	607
260	0.0010552	30	314	27	598
261	0.0010829	34	308	26	582
262	0.0009757	11	291	26	571
263	0.0010147	9	285	23	561
264	0.0009639	26	307	27	588
265	0.0010253	12	306	26	600
266	0.0010185	30	312	26	594
267	0.0010665	68	343	23	618
268	0.0010308	48	327	25	606
269	0.0008656	64	320	20	576
270	0.0010625	37	324	26	611
271	0.0009393	52	315	23	578
272	0.0009798	10	302	26	594
273	0.0010215	21	309	25	597
274	0.0010667	18	298	27	578
275	0.0010339	2	305	28	608
276	0.0011634	1	304	23	607
277	0.0009938	74	352	28	630
278	0.0010378	46	319	24	592
279	0.0009896	31	311	21	591
280	0.0011045	44	311	21	578
281	0.001024	9	306	24	603
282	0.0010398	11	297	23	583
283	0.0009903	74	338	23	602
284	0.0010071	5	296	21	587
285	0.0010419	34	320	26	606
286	0.0009792	7	307	24	607
287	0.0010792	14	300	22	586
288	0.0013024	2	289	22	576
289	0.0009203	117	367	27	617
290	0.0010957	30	316	28	602
291	0.0010508	21	302	28	583
292	0.0010006	80	347	26	614
293	0.0009154	5	288	22	571
294	0.0011384	48	325	25	602
295	0.0010511	82	354	28	626
296	0.0010578	30	310	21	590
297	0.0010635	2	288	24	574
298	0.0010024	3	304	21	605
299	0.0008956	93	339	29	585
300	0.0009531	73	323	25	573
301	0.0010112	7	297	22	587
302	0.0009845	1	297	28	593
303	0.0010183	32	314	21	596
304	0.0011025	4	295	20	586
305	0.0009897	52	319	26	586
306	0.0011484	7	303	25	599
307	0.0010023	58	326	27	594
308	0.0009918	2	298	23	594
309	0.0009683	0	283	26	566
310	0.0010224	10	288	21	566
311	0.0009603	105	355	27	605
312	0.0010589	7	313	24	619
313	0.0009844	21	303	23	585
314	0.0010078	18	306	24	594
315	0.0010136	102	360	29	618
316	0.0010553	5	299	22	593
317	0.0010564	16	305	19	594
318	0.0009641	36	309	27	582
319	0.0010478	3	299	24	595
320	0.001064	48	333	28	618
321	0.0011849	1	303	23	605
322	0.00117	26	303	23	580
323	0.0010432	14	295	20	576
324	0.001134	10	316	25	622
325	0.0009863	24	312	25	600
326	0.0009439	31	313	25	595
327	0.0009554	4	291	20	578
328	0.0010536	10	312	28	614
329	0.0011662	25	307	27	589
330	0.0010578	14	305	21	596
331	0.0011726	52	331	29	610
332	0.001006	29	313	23	597
333	0.0009473	42	322	23	602
334	0.0009716	25	309	24	593
335	0.0009633	131	384	27	637
336	0.0010997	27	301	23	575
337	0.0010486	6	303	24	600
338	0.0011436	20	311	24	602
339	0.0010056	54	323	22	592
340	0.0010051	11	298	25	585
341	0.0010045	0	305	26	610
342	0.0009539	4	297	23	590
343	0.0009934	9	298	21	587
344	0.001078	15	319	26	623
345	0.0010101	146	391	29	636
346	0.0009961	12	305	29	598
347	0.0008642	111	363	28	615
348	0.0009859	9	300	26	591
349	0.00105	33	320	28	607
350	0.0010065	112	374	29	636
351	0.0011609	10	302	29	594
352	0.0010549	12	310	24	608
353	0.0015637	44	322	26	600
354	0.0010222	13	299	21	585
355	0.0009706	58	335	25	612
356	0.0009771	10	312	23	614
357	0.0010224	7	303	21	599
358	0.0010418	7	303	28	599
359	0.0010918	37	317	28	597
360	0.0009226	16	298	26	580
361	0.0009051	85	336	28	587
362	0.0009935	25	300	27	575
363	0.0010461	5	292	26	579
364	0.0010693	31	311	26	591
365	0.0010241	11	303	23	595
366	0.0009369	15	293	21	571
367	0.001048	82	355	28	628
368	0.0010247	37	303	24	569
369	0.0011673	13	311	28	609
370	0.0011379	22	311	22	600
371	0.0009764	123	369	29	615
372	0.0010764	6	294	20	582
373	0.0009738	11	318	28	625
374	0.0011476	17	309	23	601
375	0.0010446	1	291	27	581
376	0.0010815	39	317	25	595
377	0.001062	13	313	25	613
378	0.0011306	18	307	28	596
379	0.001047	42	330	26	618
380	0.0011153	6	301	25	596
381	0.0010047	28	300	22	572
382	0.0010857	15	306	23	597
383	0.0010544	7	301	27	595
384	0.0010114	32	317	24	602
385	0.0011181	34	320	25	606
386	0.0010511	30	305	21	580
387	0.0010584	116	370	29	624
388	0.0009391	11	307	23	603
389	0.0009988	9	300	27	591
390	0.000988	28	315	22	602
391	0.000959	117	359	28	601
392	0.0010841	102	358	26	614
393	0.0009094	42	319	25	596
394	0.0014568	45	322	23	599
395	0.0009625	21	292	25	563
396	0.0009536	92	346	24	600
397	0.0009217	56	319	29	582
398	0.0010357	0	302	26	604
399	0.0010784	88	342	29	596
400	0.0010142	146	381	29	616
401	0.0011279	10	302	25	594
402	0.0009282	46	319	24	592
403	0.0010312	35	334	28	633
404	0.0010572	96	361	27	626
405	0.0009372	27	297	28	567
406	0.0009767	17	320	24	623
407	0.0012158	97	353	28	609
408	0.0011052	19	317	29	615
409	0.001139	68	334	27	600
410	0.000978	21	300	22	579
411	0.0011472	26	321	27	616
412	0.0009722	146	391	29	636
413	0.0009609	86	353	25	620
414	0.0010319	14	310	22	606
415	0.0009654	15	296	25	577
416	0.0010316	80	345	24	610
417	0.001035	50	329	21	608
418	0.0020276	56	337	23	618
419	0.0009308	78	340	28	602
420	0.0010927	39	319	22	599
421	0.0009847	18	310	25	602
422	0.0010146	1	293	25	585
423	0.0011563	2	301	23	600
424	0.0010917	5	317	27	629
425	0.0009661	185	422	29	659
426	0.0009748	11	292	19	573
427	0.0010426	15	313	24	611
428	0.0010736	25	321	26	617
429	0.0010815	7	306	24	605
430	0.0009235	47	302	23	557
431	0.0010058	45	328	25	611
432	0.0010116	118	375	29	632
433	0.0009806	31	316	26	601
434	0.0011107	47	337	25	627
435	0.0011014	36	322	23	608
436	0.0011541	13	304	22	595
437	0.0010293	91	349	27	607
438	0.0009714	18	300	28	582
439	0.0010324	14	304	23	594
440	0.0010771	32	322	28	612
441	0.0010231	2	312	26	622
442	0.0013218	12	308	24	604
443	0.0009321	84	335	29	586
444	0.0009682	69	332	28	595
445	0.0011771	70	331	25	592
446	0.0010382	0	312	27	624
447	0.0009938	53	338	28	623
448	0.0011117	15	305	25	595
449	0.0010671	14	304	28	594
450	0.0010493	16	298	28	580
451	0.0009269	50	311	28	572
452	0.001123	40	325	25	610
453	0.0011628	8	313	28	618
454	0.0010395	5	295	27	585
455	0.0010345	102	375	27	648
456	0.0011143	6	292	24	578
457	0.0010207	16	307	29	598
458	0.0010409	3	309	24	615
459	0.001075	17	311	25	605
460	0.0010483	37	315	25	593
461	0.0008944	82	331	27	580
462	0.0010309	23	306	22	589
463	0.0009686	44	316	22	588
464	0.0010392	33	318	26	603
465	0.0010823	38	316	25	594
466	0.0010599	7	300	19	593
467	0.0010285	22	297	23	572
468	0.0013998	2	304	24	606
469	0.0009647	19	290	22	561
470	0.0011177	21	314	27	607
471	0.0009919	5	294	23	583
472	0.0009842	35	301	25	567
473	0.0009611	45	322	29	599
474	0.0010967	20	312	24	604
475	0.0010046	10	285	22	560
476	0.0011235	1	291	23	581
477	0.0010398	3	293	24	583
478	0.0010656	26	314	26	602
479	0.0010465	9	304	25	599
480	0.0009558	72	341	23	610
481	0.0010617	53	327	29	601
482	0.0010481	8	305	28	602
483	0.001093	14	305	22	596
484	0.0010121	62	324	23	586
485	0.0012073	6	305	24	604
486	0.0010983	5	296	24	587
487	0.0009792	1	293	22	585
488	0.0009343	116	368	28	620
489	0.00118	32	314	26	596
490	0.0010038	3	301	23	599
491	0.0010178	57	326	26	595
492	0.0010837	38	320	24	602
493	0.0009564	85	348	27	611
494	0.0010112	4	296	27	588
495	0.0009685	71	320	24	569
496	0.0009918	104	358	29	612
497	0.0010617	14	313	25	612
498	0.0010821	13	306	27	599
499	0.0011115	105	363	24	621
500	0.0010835	0	300	22	600
501	0.0010082	29	309	25	589
502	0.0011087	18	311	25	604
503	0.0010899	3	300	24	597
504	0.0009862	88	348	27	608
505	0.0010765	5	290	21	575
506	0.0010836	7	303	25	599
507	0.0010214	1	289	25	577
508	0.0010346	31	319	25	607
509	0.00109	44	331	26	618
510	0.0008844	78	336	26	594
511	0.0009299	6	295	27	584
512	0.001103	27	301	26	575
513	0.0010374	37	306	23	575
514	0.0010353	24	317	23	610
515	0.0009659	37	307	28	577
516	0.0008946	85	334	27	583
517	0.0009548	98	357	25	616
518	0.0010169	16	312	21	608
519	0.0009413	27	299	29	571
520	0.0011399	4	303	25	602
521	0.0012146	29	307	23	585
522	0.0010382	22	308	28	594
523	0.0009927	7	299	27	591
524	0.0011204	36	334	28	632
525	0.0009636	14	295	24	576
526	0.0010545	29	311	24	593
527	0.001074	52	323	27	594
528	0.0010501	50	314	25	578
529	0.0009323	47	307	24	567
530	0.000968	83	347	25	611
531	0.0011447	5	305	26	605
532	0.0009841	8	293	24	578
533	0.0010422	14	310	26	606
534	0.0009996	3	292	24	581
535	0.0008892	106	357	27	608
536	0.0009822	41	316	24	591
537	0.0010406	10	302	25	594
538	0.0010726	12	309	29	606
539	0.0011358	28	315	26	602
540	0.0009537	2	302	25	602
541	0.0010454	63	323	28	583
542	0.0010934	62	322	24	582
543	0.0009768	23	313	23	603
544	0.0011423	20	305	24	590
545	0.0010786	2	310	27	618
546	0.0010045	14	295	23	576
547	0.0010876	43	316	27	589
548	0.0010425	47	330	24	613
549	0.0011228	2	296	26	590
550	0.0010936	8	308	28	608
551	0.0009487	127	379	27	631
552	0.0010243	21	302	25	583
553	0.0009785	13	298	21	583
554	0.0010474	15	313	25	611
555	0.0010944	11	306	26	601
556	0.0009571	53	315	27	577
557	0.0012278	15	302	22	589
558	0.0010242	108	362	29	616
559	0.0009809	79	346	28	613
560	0.0010492	41	316	24	591
561	0.001106	31	329	28	627
562	0.0010203	114	375	27	636
563	0.0010391	11	302	24	593
564	0.0009702	82	353	28	624
565	0.0010211	46	324	23	602
566	0.0009833	40	314	24	588
567	0.0010288	7	292	22	577
568	0.001085	8	311	24	614
569	0.001052	37	326	25	615
570	0.0009892	0	294	24	588
571	0.0010661	82	351	28	620
572	0.0009995	37	321	27	605
573	0.0010359	31	305	22	579
574	0.0012011	11	297	24	583
575	0.0010255	13	298	23	583
576	0.0009876	80	344	28	608
577	0.0011024	12	301	29	590
578	0.0009945	15	302	25	589
579	0.0009547	54	322	24	590
580	0.0010352	1	298	24	595
581	0.0011239	29	322	24	615
582	0.0010068	15	302	26	589
583	0.0010243	2	305	29	608
584	0.0013521	34	331	24	628
585	0.0010299	7	309	24	611
586	0.0009906	49	334	23	619
587	0.0009922	27	309	23	591
588	0.0011462	57	320	26	583
589	0.0010312	9	293	22	577
590	0.0010486	24	308	25	592
591	0.0010822	10	301	29	592
592	0.0009412	81	341	28	601
593	0.0010431	52	326	29	600
594	0.001072	15	306	26	597
595	0.0010153	42	310	22	578
596	0.0010238	89	355	28	621
597	0.0010419	118	379	27	640
598	0.0010555	10	305	22	600
599	0.0011812	16	298	25	580
600	0.0009534	20	302	28	584
601	0.0010058	17	317	25	617
602	0.0010031	6	298	24	590
603	0.001094	13	305	26	597
604	0.0011051	35	319	21	603
605	0.0010142	4	308	27	612
606	0.0009866	3	296	21	589
607	0.0010366	37	312	25	587
608	0.001008	23	299	23	575
609	0.0010651	25	299	22	573
610	0.001068	74	336	27	598
611	0.0011662	4	313	26	622
612	0.0010596	13	312	26	611
613	0.0011763	21	333	25	645
614	0.0011518	35	318	26	601
615	0.0011154	19	305	24	591
616	0.0010148	3	307	25	611
617	0.0009714	9	299	21	589
618	0.0011905	3	307	23	611
619	0.0010774	2	306	25	610
620	0.0011541	8	307	25	606
621	0.0010936	37	324	27	611
622	0.0011617	37	336	27	635
623	0.0009152	0	291	20	582
624	0.001091	2	285	24	568
625	0.0009781	32	303	27	574
626	0.00093	5	290	22	575
627	0.0011274	24	316	26	608
628	0.0009803	4	307	22	610
629	0.0010097	36	311	24	586
630	0.0010184	10	302	24	594
631	0.0010039	29	304	26	579
632	0.0010296	0	297	21	594
633	0.000958	7	295	22	583
634	0.0010635	46	320	26	594
635	0.0011088	14	303	23	592
636	0.0010702	23	303	28	583
637	0.0009702	50	313	28	576
638	0.0010418	19	296	26	573
639	0.0012471	5	301	21	597
640	0.0009305	5	290	25	575
641	0.0011137	28	306	22	584
642	0.0010585	6	308	26	610
643	0.0009935	36	312	24	588
644	0.001041	5	294	22	583
645	0.0010551	4	303	22	602
646	0.0011153	11	293	24	575
647	0.001197	51	314	27	577
648	0.0009529	61	323	23	585
649	0.001013	12	305	25	598
650	0.0010709	22	303	22	584
651	0.0010971	8	296	24	584
652	0.0010902	68	326	29	584
653	0.0009617	96	359	29	622
654	0.0010535	10	302	24	594
655	0.0010236	3	305	22	607
656	0.0011606	59	336	23	613
657	0.00102	33	318	24	603
658	0.001057	1	303	25	605
659	0.0009733	28	313	23	598
660	0.0010567	27	324	23	621
661	0.0010797	62	333	25	604
662	0.0010345	10	312	27	614
663	0.0011388	55	329	28	603
664	0.0009634	14	303	26	592
665	0.0010601	3	291	23	579
666	0.0010145	6	297	25	588
667	0.0009985	73	331	29	589
668	0.001018	18	321	25	624
669	0.0010664	16	299	24	582
670	0.0009709	126	373	29	620
671	0.0009284	92	350	29	608
672	0.001082	5	309	25	613
673	0.0010706	52	325	22	598
674	0.001053	15	302	23	589
675	0.0010725	23	319	24	615
676	0.0010411	32	314	21	596
677	0.0011283	16	313	26	610
678	0.0010723	120	378	29	636
679	0.0010179	12	293	23	574
680	0.0011788	13	314	24	615
681	0.0010595	11	289	27	567
682	0.0010247	24	310	21	596
683	0.0010106	34	314	27	594
684	0.0010809	21	305	26	589
685	0.0009708	2	292	24	582
686	0.0010144	34	309	24	584
687	0.0011088	22	303	25	584
688	0.0009626	5	292	23	579
689	0.0008898	83	339	26	595
690	0.0009974	1	292	27	583
691	0.0010486	22	308	22	594
692	0.0010908	82	358	29	634
693	0.0010664	21	314	24	607
694	0.0010402	12	315	21	618
695	0.001101	21	307	21	593
696	0.0009302	85	345	24	605
697	0.0010933	14	306	29	598
698	0.0010115	29	304	21	579
699	0.0010032	103	360	27	617
700	0.0009625	55	319	22	583
701	0.0009892	44	320	26	596
702	0.0011268	57	343	28	629
703	0.0011753	20	305	26	590
704	0.0010538	1	290	20	579
705	0.0009542	19	313	29	607
706	0.0010624	22	303	29	584
707	0.0010715	12	300	26	588
708	0.0011032	21	316	24	611
709	0.0009967	3	295	23	587
710	0.0011752	30	310	24	590
711	0.0011023	21	322	25	623
712	0.0010337	32	316	22	600
713	0.000967	108	360	28	612
714	0.0010801	12	309	26	606
715	0.0010881	31	316	26	601
716	0.0010343	12	287	25	562
717	0.0009914	39	318	25	597
718	0.0010749	37	327	25	617
719	0.0009589	47	328	27	609
720	0.0010899	25	309	23	593
721	0.0009876	83	342	29	601
722	0.0011161	43	319	24	595
723	0.0010394	41	309	22	577
724	0.0010224	2	299	22	596
725	0.00094	0	285	26	570
726	0.0010593	41	320	22	599
727	0.000982	20	304	22	588
728	0.0010023	18	295	20	572
729	0.0009505	57	312	25	567
730	0.0010183	1	301	23	601
731	0.0010769	14	308	24	602
732	0.0010617	14	297	21	580
733	0.0009613	21	301	22	581
734	0.0011353	10	304	24	598
735	0.0009395	75	336	25	597
736	0.001016	17	314	23	611
737	0.0009976	11	302	27	593
738	0.0009792	9	295	20	581
739	0.0010403	39	331	25	623
740	0.0010523	52	313	29	574
741	0.0009361	14	295	28	576
742	0.0009472	120	374	28	628
743	0.0010989	30	322	29	614
744	0.0009842	13	303	23	593
745	0.001058	16	298	23	580
746	0.0010543	64	340	25	616
747	0.0011875	10	300	28	590
748	0.0010839	65	342	23	619
749	0.0009701	81	345	23	609
750	0.0010532	15	311	24	607
751	0.0010263	3	300	22	597
752	0.0010047	28	294	22	560
753	0.0011093	26	299	23	572
754	0.0010207	58	332	25	606
755	0.0010086	10	297	27	584
756	0.000998	15	292	29	569
757	0.0010834	6	304	21	602
758	0.001063	76	346	23	616
759	0.0011045	6	300	24	594
760	0.0009913	90	351	25	612
761	0.0010027	23	316	23	609
762	0.0011314	7	307	24	607
763	0.0008929	40	330	24	620
764	0.001056	49	341	26	633
765	0.0008923	100	350	28	600
766	0.0010463	52	322	23	592
767	0.001123	1	288	20	575
768	0.0009245	90	343	24	596
769	0.0010123	25	300	23	575
770	0.0010499	23	307	24	591
771	0.0010068	11	306	26	601
772	0.0010462	10	308	28	606
773	0.001022	20	307	29	594
774	0.0010867	11	296	22	581
775	0.0009782	85	347	27	609
776	0.0009822	12	292	23	572
777	0.0010133	20	302	29	584
778	0.0009912	102	357	27	612
779	0.0009646	53	322	29	591
780	0.0011809	0	299	23	598
781	0.0011511	47	326	25	605
782	0.001021	3	298	24	593
783	0.0009686	52	329	25	606
784	0.001028	54	315	27	576
785	0.0009856	25	306	24	587
786	0.0011866	14	310	21	606
787	0.0011815	11	294	22	577
788	0.0010656	20	306	24	592
789	0.0008924	68	319	28	570
790	0.0010513	16	303	24	590
791	0.0010253	16	292	20	568
792	0.0011589	28	320	25	612
793	0.0010117	107	364	28	621
794	0.0010246	3	295	26	587
795	0.0009807	53	320	25	587
796	0.0010251	10	307	28	604
797	0.0010889	35	326	24	617
798	0.0010215	10	304	24	598
799	0.0009978	27	311	22	595
800	0.0011419	16	302	25	588
801	0.0009933	15	296	22	577
802	0.0011069	56	338	25	620
803	0.0009146	16	305	27	594
804	0.0009835	7	307	22	607
805	0.0010768	40	329	27	618
806	0.0010865	7	306	20	605
807	0.0010191	84	350	27	616
808	0.0010315	80	337	24	594
809	0.0011273	20	307	23	594
810	0.001101	38	316	23	594
811	0.0011848	3	305	27	607
812	0.0010057	20	314	28	608
813	0.0010239	2	285	28	568
814	0.0010044	50	331	26	612
815	0.0011671	12	312	26	612
816	0.0010046	27	308	20	589
817	0.0009508	1	286	21	571
818	0.001181	8	298	29	588
819	0.001013	7	290	22	573
820	0.0009475	36	308	24	580
821	0.0009278	49	322	23	595
822	0.0010726	50	332	26	614
823	0.0010915	23	327	28	631
824	0.0009429	80	354	25	628
825	0.0009471	59	328	27	597
826	0.0009767	13	298	22	583
827	0.0009655	11	300	24	589
828	0.0009559	36	319	23	602
829	0.0010113	99	356	29	613
830	0.001038	23	314	25	605
831	0.0011222	16	318	22	620
832	0.0010116	19	292	29	565
833	0.001091	13	309	28	605
834	0.0011202	22	303	24	584
835	0.0009334	42	322	23	602
836	0.0009934	18	312	25	606
837	0.0009802	91	353	27	615
838	0.0010123	25	298	27	571
839	0.0010883	35	321	22	607
840	0.0010352	11	302	29	593
841	0.0010863	1	297	21	593
842	0.0010984	13	309	25	605
843	0.0009142	49	310	24	571
844	0.0011184	31	310	26	589
845	0.001073	5	301	25	597
846	0.0010283	61	326	27	591
847	0.0010497	10	297	28	584
848	0.0009635	25	299	24	573
849	0.000998	5	290	27	575
850	0.0010247	13	286	19	559
851	0.0010805	2	306	26	610
852	0.0010724	7	295	24	583
853	0.00094	110	364	26	618
854	0.0012499	4	300	22	596
855	0.0010405	18	305	20	592
856	0.0009937	40	311	26	582
857	0.0010539	20	302	24	584
858	0.0010156	12	310	25	608
859	0.0009957	74	339	27	604
860	0.0010049	74	327	28	580
861	0.0010726	1	300	19	599
862	0.001043	32	303	24	574
863	0.0009786	17	306	27	595
864	0.0010587	24	322	26	620
865	0.000916	51	333	22	615
866	0.0011061	95	357	29	619
867	0.0011041	33	324	29	615
868	0.001074	25	312	27	599
869	0.0010669	22	317	26	612
870	0.0010866	36	318	27	600
871	0.0014725	27	295	27	563
872	0.0010625	26	314	25	602
873	0.0010434	21	312	22	603
874	0.0009978	16	298	20	580
875	0.0010935	23	310	24	597
876	0.0009776	45	326	24	607
877	0.0011823	7	305	21	603
878	0.0010577	117	369	29	621
879	0.0012597	45	349	28	653
880	0.0010997	21	308	26	595
881	0.0010269	50	322	28	594
882	0.0009994	28	325	27	622
883	0.0009546	24	306	27	588
884	0.0010776	11	317	24	623
885	0.0011354	9	297	22	585
886	0.0009508	118	367	29	616
887	0.0010352	48	334	24	620
888	0.0010925	8	303	25	598
889	0.0008646	51	311	20	571
890	0.0010709	28	318	22	608
891	0.0009785	9	296	27	583
892	0.0010114	2	308	26	614
893	0.0011581	13	317	28	621
894	0.0009143	148	398	29	648
895	0.0010968	1	296	23	591
896	0.0011473	22	306	23	590
897	0.0010389	2	287	20	572
898	0.0010558	1	298	21	595
899	0.0010799	1	303	28	605
900	0.0010566	60	333	29	606
901	0.0010279	9	302	22	595
902	0.0009076	104	363	23	622
903	0.0010602	5	303	21	601
904	0.0009341	26	317	27	608
905	0.001035	83	346	27	609
906	0.0009634	30	309	22	588
907	0.0009665	5	289	19	573
908	0.0010071	66	321	27	576
909	0.0010332	27	324	25	621
910	0.0009824	101	357	29	613
911	0.0009506	102	356	29	610
912	0.0011453	30	314	23	598
913	0.0011627	27	319	25	611
914	0.0010463	65	335	25	605
915	0.001109	6	312	24	618
916	0.0010201	17	293	26	569
917	0.0010442	24	306	27	588
918	0.001027	14	294	26	574
919	0.0009793	77	348	28	619
920	0.0009701	6	289	21	572
921	0.0010283	2	298	22	594
922	0.0009973	0	288	22	576
923	0.0010381	51	322	25	593
924	0.0010753	25	311	26	597
925	0.0009689	24	316	23	608
926	0.0009853	3	297	22	591
927	0.0009942	4	294	22	584
928	0.0010939	15	304	23	593
929	0.0011305	69	352	27	635
930	0.0010001	39	308	25	577
931	0.0011232	20	301	23	582
932	0.0010994	26	319	27	612
933	0.0009189	125	376	26	627
934	0.0009663	0	288	22	576
935	0.001078	34	318	22	602
936	0.0009448	125	374	29	623
937	0.0010946	32	323	23	614
938	0.0010865	15	317	25	619
939	0.0012631	25	311	23	597
940	0.001092	16	298	27	580
941	0.0010594	2	304	26	606
942	0.0010192	60	325	25	590
943	0.001114	21	314	27	607
944	0.0011136	1	283	24	565
945	0.0010794	8	304	22	600
946	0.0011487	15	316	27	617
947	0.001006	54	317	25	580
948	0.0009468	6	293	27	580
949	0.0010931	92	357	29	622
950	0.0011163	23	302	29	581
951	0.001085	7	319	27	631
952	0.0010284	15	309	26	603
953	0.001048	12	307	21	602
954	0.0009496	107	362	26	617
955	0.0010167	43	324	24	605
956	0.0010655	30	314	24	598
957	0.0008996	121	368	28	615
958	0.0008896	96	346	25	596
959	0.0009762	95	355	28	615
960	0.0009532	85	340	27	595
961	0.0010079	6	306	28	606
962	0.0009764	83	351	24	619
963	0.0009655	74	339	25	604
964	0.0010381	42	321	26	600
965	0.00095	12	293	21	574
966	0.0010008	95	358	28	621
967	0.0009318	102	363	25	624
968	0.0012231	20	303	28	586
969	0.0009109	94	354	25	614
970	0.0010104	12	307	27	602
971	0.0010593	12	308	24	604
972	0.0011014	36	318	23	600
973	0.0010316	113	353	28	593
974	0.0010541	21	309	26	597
975	0.0010342	23	304	28	585
976	0.001116	20	298	20	576
977	0.0013196	37	330	24	623
978	0.0009256	3	293	20	583
979	0.0012028	54	335	29	616
980	0.0010452	25	313	25	601
981	0.0009231	62	321	23	580
982	0.0010586	36	318	29	600
983	0.0009761	146	397	28	648
984	0.0009603	83	346	28	609
985	0.0010777	6	296	25	586
986	0.0011191	0	301	26	602
987	0.0010617	8	307	26	606
988	0.0009614	72	334	27	596
989	0.0010546	8	292	22	576
990	0.0011759	21	322	27	623
991	0.0010298	113	377	27	641
992	0.0010029	71	328	24	585
993	0.0010529	46	327	28	608
994	0.0010655	45	322	26	599
995	0.0010607	102	359	29	616
996	0.0009308	164	405	29	646
997	0.0010413	12	304	24	596
998	0.0012159	20	329	28	638
999	0.0010134	56	320	29	584
mean	0.00104436	34.351	316.18	25.03	598.009

## Sheet: PowerBalance_SEq
	time	SEq	Bal	Reg	Egal
0	0.000743	4	307	24	610
1	0.0006443	24	313	22	602
2	0.0011076	13	304	29	595
3	0.0005755	19	297	24	575
4	0.0006042	9	303	22	597
5	0.0006281	1	312	22	623
6	0.0006169	1	295	22	589
7	0.0007845	23	320	24	617
8	0.0009577	32	322	25	612
9	0.0007638	14	299	22	584
10	0.0005532	2	301	27	600
11	0.0007757	13	306	22	599
12	0.0007938	4	321	24	638
13	0.0007914	23	324	25	625
14	0.0009591	12	303	19	594
15	0.0006272	15	307	26	599
16	0.000886	43	328	26	613
17	0.0005431	1	290	23	579
18	0.0006099	6	310	27	614
19	0.0008109	10	302	20	594
20	0.000778	12	316	23	620
21	0.0007899	14	305	25	596
22	0.0007775	6	299	24	592
23	0.0007499	15	302	27	589
24	0.0008087	11	301	25	591
25	0.0007857	2	300	22	598
26	0.0005425	1	292	25	583
27	0.0006676	5	300	23	595
28	0.0005415	7	294	20	581
29	0.000609	4	305	27	606
30	0.0007951	13	301	26	589
31	0.0006272	24	300	23	576
32	0.0007606	6	306	27	606
33	0.0006734	4	306	25	608
34	0.0006056	1	318	25	635
35	0.0008407	15	302	23	589
36	0.000778	9	294	25	579
37	0.0006536	8	300	25	592
38	0.0008819	11	303	29	595
39	0.0005504	2	299	23	596
40	0.0005664	4	294	25	584
41	0.0006793	34	311	24	588
42	0.0007932	3	308	26	613
43	0.0005626	2	287	27	572
44	0.0007568	11	315	24	619
45	0.0007793	19	300	21	581
46	0.0007664	12	306	28	600
47	0.000657	8	304	24	600
48	0.0006296	4	296	26	588
49	0.0008291	5	308	26	611
50	0.0006278	18	303	27	588
51	0.0007067	1	307	27	613
52	0.0004957	13	287	22	561
53	0.0006098	21	296	26	571
54	0.0005565	4	285	25	566
55	0.0005588	3	297	28	591
56	0.0005643	8	296	22	584
57	0.000792	7	312	24	617
58	0.0005284	6	290	19	574
59	0.0006368	9	296	21	583
60	0.0005451	3	297	23	591
61	0.0007143	4	316	27	628
62	0.0005809	2	288	20	574
63	0.0006071	5	293	27	581
64	0.0007469	5	293	24	581
65	0.0004945	0	289	20	578
66	0.0007799	23	310	23	597
67	0.0005716	1	305	24	609
68	0.0005858	4	294	23	584
69	0.000797	8	291	27	574
70	0.0008012	18	301	24	584
71	0.0005777	0	295	23	590
72	0.0007713	7	298	27	589
73	0.0007669	12	304	28	596
74	0.0008284	6	319	27	632
75	0.0005835	10	298	20	586
76	0.0007829	41	333	26	625
77	0.0007969	12	299	29	586
78	0.0007535	7	296	24	585
79	0.0007765	23	317	26	611
80	0.0006103	7	300	19	593
81	0.0006471	4	308	26	612
82	0.0007922	13	299	27	585
83	0.0006284	2	294	22	586
84	0.0008358	14	298	20	582
85	0.000798	4	299	21	594
86	0.0005633	4	300	21	596
87	0.0013444	9	299	22	589
88	0.0006232	1	297	21	593
89	0.0007999	17	298	22	579
90	0.0005871	6	301	23	596
91	0.0006371	20	308	25	596
92	0.0006001	0	294	22	588
93	0.0006495	6	300	22	594
94	0.0005633	1	296	25	591
95	0.0006306	22	300	21	578
96	0.0005068	4	281	26	558
97	0.0005691	7	303	25	599
98	0.0006455	2	292	24	582
99	0.0008189	9	304	25	599
100	0.0005271	10	289	21	568
101	0.0007702	11	315	25	619
102	0.000604	3	285	24	567
103	0.0005146	1	295	22	589
104	0.0008156	23	315	28	607
105	0.0006249	1	296	24	591
106	0.0006385	7	299	22	591
107	0.0006504	7	293	22	579
108	0.0007554	10	302	22	594
109	0.0007449	3	305	29	607
110	0.0009454	12	288	29	564
111	0.0007568	15	309	24	603
112	0.0007909	17	302	22	587
113	0.000794	6	297	21	588
114	0.0006345	0	299	20	598
115	0.0007915	14	301	27	588
116	0.0005982	10	304	21	598
117	0.0006694	26	313	28	600
118	0.0005843	6	297	27	588
119	0.0006601	1	309	24	617
120	0.0006757	5	299	23	593
121	0.0007135	2	290	23	578
122	0.0005845	7	291	23	575
123	0.000807	23	307	20	591
124	0.0006335	3	300	26	597
125	0.0008557	14	306	21	598
126	0.0007704	16	295	24	574
127	0.0006105	4	297	25	590
128	0.000606	10	289	21	568
129	0.0007673	23	316	23	609
130	0.0008222	18	305	24	592
131	0.0006619	10	306	24	602
132	0.0007995	12	304	26	596
133	0.0007487	14	302	23	590
134	0.000619	0	301	28	602
135	0.0008544	10	297	21	584
136	0.0008617	11	301	24	591
137	0.0007627	9	304	24	599
138	0.0006669	5	301	28	597
139	0.0007825	13	302	29	591
140	0.0007956	8	308	25	608
141	0.0007091	3	295	25	587
142	0.000579	10	303	24	596
143	0.0006486	2	300	26	598
144	0.0006202	6	300	21	594
145	0.0007751	18	320	25	622
146	0.0006539	9	291	24	573
147	0.0008904	66	343	29	620
148	0.0007695	33	325	26	617
149	0.0006157	6	295	20	584
150	0.0007741	8	314	24	620
151	0.0006059	1	291	21	581
152	0.0005386	14	297	20	580
153	0.0005688	8	293	22	578
154	0.0007804	42	320	24	598
155	0.0006572	7	295	24	583
156	0.0006765	9	308	26	607
157	0.0005264	5	291	23	577
158	0.0005813	6	302	26	598
159	0.0005849	6	295	22	584
160	0.0007716	25	301	22	577
161	0.0005767	8	302	25	596
162	0.0005952	12	299	25	586
163	0.0006676	2	309	25	616
164	0.0005825	16	304	26	592
165	0.0008002	14	313	26	612
166	0.0006385	0	281	19	562
167	0.0005576	0	293	24	586
168	0.0006143	0	284	26	568
169	0.0005616	2	285	27	568
170	0.0006676	4	301	25	598
171	0.0006312	1	288	26	575
172	0.0010092	11	289	20	567
173	0.0007646	16	306	24	596
174	0.0007615	7	295	21	583
175	0.0008091	17	300	22	583
176	0.0006236	52	322	26	592
177	0.0007764	11	312	28	613
178	0.0006731	8	306	23	604
179	0.000546	4	301	21	598
180	0.000776	18	315	28	612
181	0.0006749	7	310	25	613
182	0.0005837	1	313	24	625
183	0.0006424	7	304	29	601
184	0.0007687	16	307	25	598
185	0.0007853	15	306	25	597
186	0.0007734	3	304	27	605
187	0.0008442	30	320	26	610
188	0.0007861	11	307	28	603
189	0.0007876	7	294	25	581
190	0.0005364	1	285	23	569
191	0.0007817	20	301	25	582
192	0.0007443	17	304	25	591
193	0.0008624	8	305	28	602
194	0.000597	4	294	24	584
195	0.0008603	10	323	29	636
196	0.0006018	0	307	27	614
197	0.0008467	16	314	25	612
198	0.0007953	16	314	24	612
199	0.000815	39	323	22	607
200	0.0006197	17	308	25	599
201	0.0005483	6	295	25	584
202	0.0007715	13	294	29	575
203	0.0006865	6	299	27	592
204	0.0006948	4	306	23	608
205	0.0007438	21	302	28	583
206	0.0006779	7	304	27	601
207	0.0007798	6	300	24	594
208	0.0006044	5	312	25	619
209	0.0007716	10	308	25	606
210	0.0007824	12	306	26	600
211	0.0005595	4	302	26	600
212	0.0007818	16	299	21	582
213	0.0007786	12	296	25	580
214	0.0006196	0	299	29	598
215	0.0008965	12	317	27	622
216	0.0007347	24	296	29	568
217	0.0007007	45	329	29	613
218	0.0007795	20	304	23	588
219	0.0006522	28	302	29	576
220	0.0008357	14	302	21	590
221	0.0006546	6	307	25	608
222	0.0007557	11	298	23	585
223	0.0005779	0	289	25	578
224	0.0006503	19	312	25	605
225	0.0007636	10	308	25	606
226	0.0006025	9	311	29	613
227	0.0005919	7	295	23	583
228	0.0007757	11	299	23	587
229	0.0007551	9	315	29	621
230	0.0006597	19	306	24	593
231	0.0007958	20	319	29	618
232	0.0005497	2	290	24	578
233	0.0008534	7	305	25	603
234	0.000727	5	311	24	617
235	0.0005842	1	296	21	591
236	0.0008495	13	324	23	635
237	0.0006445	5	300	22	595
238	0.0004956	2	289	19	576
239	0.0007783	12	303	24	594
240	0.0006332	27	304	27	581
241	0.0007774	4	309	27	614
242	0.0006356	7	317	27	627
243	0.0006116	1	310	23	619
244	0.0008139	15	310	24	605
245	0.000792	5	303	25	601
246	0.0006042	8	299	22	590
247	0.0007874	4	304	26	604
248	0.0005754	4	294	20	584
249	0.0008351	12	296	24	580
250	0.0005996	0	289	23	578
251	0.0006301	17	299	27	581
252	0.0005341	4	288	26	572
253	0.0008405	16	291	22	566
254	0.0006275	25	303	24	581
255	0.0006529	6	300	28	594
256	0.0006265	9	292	23	575
257	0.00077	33	312	28	591
258	0.0007698	14	296	29	578
259	0.0007833	44	324	22	604
260	0.0006607	1	304	28	607
261	0.0008011	14	302	27	590
262	0.0006838	14	285	20	556
263	0.0008056	9	285	23	561
264	0.0006184	2	298	25	594
265	0.0006625	12	306	26	600
266	0.0007822	20	305	22	590
267	0.0007662	20	313	24	606
268	0.0007802	8	304	26	600
269	0.0008321	34	301	20	568
270	0.0006173	21	315	26	609
271	0.0005642	10	288	22	566
272	0.0007617	12	297	26	582
273	0.0006196	21	309	25	597
274	0.0007565	18	298	27	578
275	0.0007938	13	309	23	605
276	0.0006272	1	304	23	607
277	0.0007933	14	316	23	618
278	0.0007859	11	307	28	603
279	0.0007911	21	303	21	585
280	0.0008316	10	292	21	574
281	0.0005464	7	306	24	605
282	0.0005362	3	291	23	579
283	0.0007812	8	294	20	580
284	0.000522	1	293	25	585
285	0.0008055	34	320	26	606
286	0.0006319	9	305	24	601
287	0.0007472	1	296	26	591
288	0.0006395	21	298	22	575
289	0.0005753	22	306	23	590
290	0.0008341	14	299	23	584
291	0.0007656	21	302	28	583
292	0.000616	12	303	22	594
293	0.000735	4	287	22	570
294	0.0007742	9	307	26	605
295	0.0007771	9	315	24	621
296	0.0007767	30	310	21	590
297	0.0005503	2	288	24	574
298	0.0007817	3	304	21	605
299	0.0006027	15	300	28	585
300	0.0005604	1	281	20	561
301	0.0006069	7	297	22	587
302	0.0006296	9	300	28	591
303	0.0007031	4	300	23	596
304	0.0006086	4	295	20	586
305	0.0007768	7	289	19	571
306	0.0006168	20	309	25	598
307	0.0005447	1	295	27	589
308	0.00059	2	298	23	594
309	0.000581	0	283	26	566
310	0.0006266	10	288	21	566
311	0.0006176	2	293	26	584
312	0.0006673	7	313	24	619
313	0.0007792	21	303	23	585
314	0.0005669	2	296	23	590
315	0.0008099	5	300	26	595
316	0.000576	5	299	22	593
317	0.0008125	9	298	19	587
318	0.0007532	15	297	22	579
319	0.0007688	3	299	24	595
320	0.0007847	15	320	28	625
321	0.0006644	1	303	23	605
322	0.000787	15	306	28	597
323	0.0007674	13	299	24	585
324	0.0013754	17	319	25	621
325	0.0007872	24	312	25	600
326	0.0008508	31	313	25	595
327	0.0005161	4	291	20	578
328	0.0006424	10	312	28	614
329	0.0006412	4	296	23	588
330	0.0005441	3	297	21	591
331	0.0007674	52	331	29	610
332	0.0006097	29	313	23	597
333	0.0005622	4	299	23	594
334	0.0005888	1	294	24	587
335	0.0008191	26	320	26	614
336	0.0005755	5	288	23	571
337	0.000583	12	305	24	598
338	0.0006716	31	313	24	595
339	0.0008183	17	303	22	589
340	0.0008182	11	298	25	585
341	0.0008081	20	317	26	614
342	0.0005259	4	297	23	590
343	0.0005343	1	295	21	589
344	0.0006223	15	319	26	623
345	0.0008112	24	308	21	592
346	0.0008065	12	305	29	598
347	0.0006344	3	290	27	577
348	0.0007548	9	300	26	591
349	0.0005393	11	297	22	583
350	0.0006439	2	311	23	620
351	0.00077	10	302	29	594
352	0.0008049	12	310	24	608
353	0.0005929	0	296	26	592
354	0.0005845	2	295	21	588
355	0.0005754	1	301	22	601
356	0.0007565	8	305	23	602
357	0.0007779	7	303	21	599
358	0.0007753	7	303	28	599
359	0.0005397	2	302	23	602
360	0.0007084	16	298	26	580
361	0.000547	7	290	24	573
362	0.0005895	3	288	26	573
363	0.0005901	5	292	26	579
364	0.0006676	3	295	26	587
365	0.0005127	2	299	23	596
366	0.0006017	15	293	21	571
367	0.0007456	19	319	28	619
368	0.0006026	28	298	24	568
369	0.0006752	3	305	28	607
370	0.0008102	10	306	22	602
371	0.0007922	15	299	25	583
372	0.0006514	6	294	20	582
373	0.0007802	40	324	28	608
374	0.0008762	34	314	23	594
375	0.0007743	16	296	27	576
376	0.0005743	4	303	23	602
377	0.0008229	8	310	25	612
378	0.0007944	18	307	28	596
379	0.0008158	20	317	26	614
380	0.000636	9	303	25	597
381	0.0007471	9	294	24	579
382	0.000815	8	301	23	594
383	0.0007604	2	301	27	600
384	0.0005551	5	300	24	595
385	0.0007592	8	298	22	588
386	0.0006409	30	305	21	580
387	0.0007739	11	301	23	591
388	0.0005638	3	295	23	587
389	0.0006453	9	300	27	591
390	0.0007765	7	305	22	603
391	0.0008502	7	302	27	597
392	0.0007878	30	319	27	608
393	0.0007726	18	306	24	594
394	0.0006734	14	315	27	616
395	0.0006072	21	292	25	563
396	0.0009754	14	302	24	590
397	0.0007151	8	294	27	580
398	0.0005808	0	302	26	604
399	0.0007878	16	301	25	586
400	0.0005232	14	294	25	574
401	0.0007057	10	302	25	594
402	0.0005971	1	299	27	597
403	0.0008343	8	320	28	632
404	0.0008909	9	308	22	607
405	0.0007736	19	294	25	569
406	0.0006336	6	311	25	616
407	0.0007822	97	353	28	609
408	0.0005846	19	317	29	615
409	0.0005342	8	294	22	580
410	0.0005808	1	292	22	583
411	0.0007512	26	327	27	628
412	0.0007864	11	307	27	603
413	0.0005563	5	299	22	593
414	0.0008807	14	310	22	606
415	0.0007586	2	290	25	578
416	0.0007601	10	305	23	600
417	0.0008754	11	310	23	609
418	0.0006379	1	308	25	615
419	0.0005749	5	302	25	599
420	0.0006255	5	307	26	609
421	0.0008155	18	310	25	602
422	0.000755	10	297	25	584
423	0.0005875	2	301	23	600
424	0.0006298	5	317	27	629
425	0.0007736	11	307	26	603
426	0.000524	5	287	22	569
427	0.0006674	15	313	24	611
428	0.0014571	19	317	26	615
429	0.0007498	7	306	24	605
430	0.0008229	21	288	22	555
431	0.0006081	19	311	25	603
432	0.0007851	6	313	26	620
433	0.0007767	12	305	26	598
434	0.0007975	33	327	23	621
435	0.0007669	9	311	23	613
436	0.0009177	13	304	22	595
437	0.0008404	13	300	22	587
438	0.0007616	18	300	28	582
439	0.0005432	4	290	23	576
440	0.0007657	9	313	27	617
441	0.0007848	25	320	23	615
442	0.0008142	12	308	24	604
443	0.000588	14	291	23	568
444	0.0007758	8	295	23	582
445	0.000652	41	310	25	579
446	0.0006572	0	312	27	624
447	0.0006802	5	311	29	617
448	0.0008139	6	304	29	602
449	0.0006767	2	297	28	592
450	0.0007546	15	306	26	597
451	0.0006315	13	288	20	563
452	0.0007373	22	318	25	614
453	0.0007723	8	313	28	618
454	0.0007434	5	295	27	585
455	0.0009326	5	315	26	625
456	0.0005558	6	292	24	578
457	0.0007694	16	307	29	598
458	0.0007488	13	312	25	611
459	0.0005789	1	297	26	593
460	0.0008032	16	310	26	604
461	0.000601	9	292	23	575
462	0.000517	7	296	22	585
463	0.0006888	44	316	22	588
464	0.0007594	6	303	26	600
465	0.0007713	19	308	25	597
466	0.0005935	7	300	19	593
467	0.0005999	30	299	23	568
468	0.0007873	9	303	24	597
469	0.0005884	19	290	22	561
470	0.0005619	2	301	27	600
471	0.0006701	19	298	23	577
472	0.0005699	5	287	25	569
473	0.0007526	18	312	28	606
474	0.0007882	20	312	24	604
475	0.0007482	10	285	22	560
476	0.0005392	1	291	23	581
477	0.0006619	3	293	24	583
478	0.0007678	16	308	26	600
479	0.0006774	9	304	25	599
480	0.0005765	4	292	19	580
481	0.0008442	8	296	22	584
482	0.0006125	8	305	28	602
483	0.0006046	1	294	23	587
484	0.0005924	1	279	23	557
485	0.000791	6	305	24	604
486	0.000574	5	296	24	587
487	0.0007387	1	293	22	585
488	0.0006606	21	309	26	597
489	0.0007756	12	304	26	596
490	0.0005569	3	301	23	599
491	0.0006308	36	311	25	586
492	0.0007642	22	314	29	606
493	0.000792	35	318	24	601
494	0.0007804	4	296	26	588
495	0.0008626	3	294	28	585
496	0.0007872	14	304	22	594
497	0.0007618	14	313	25	612
498	0.0007383	13	306	27	599
499	0.0006054	2	298	21	594
500	0.0007897	19	306	22	593
501	0.0007726	12	304	23	596
502	0.000601	26	314	25	602
503	0.0006699	3	300	24	597
504	0.0007766	4	306	25	608
505	0.0006637	5	290	21	575
506	0.000842	7	303	25	599
507	0.0005838	1	289	25	577
508	0.0006533	3	308	28	613
509	0.0006021	1	312	28	623
510	0.0008077	6	297	27	588
511	0.0006744	6	295	27	584
512	0.0005289	4	287	26	570
513	0.0005754	37	306	23	575
514	0.0006779	33	324	22	615
515	0.0005696	2	286	25	570
516	0.0007585	4	287	24	570
517	0.0006062	3	295	20	587
518	0.0006835	2	305	21	608
519	0.0006275	27	299	29	571
520	0.0007427	4	303	25	602
521	0.0009581	23	305	27	587
522	0.0007721	22	308	28	594
523	0.0006058	7	301	26	595
524	0.0007618	18	321	28	624
525	0.0007302	4	291	24	578
526	0.000852	22	306	24	590
527	0.0006302	9	304	27	599
528	0.0007695	6	294	22	582
529	0.0005653	3	287	21	571
530	0.000795	16	304	25	592
531	0.000802	12	299	21	586
532	0.0005636	4	286	21	568
533	0.000617	1	301	26	601
534	0.0008201	3	292	24	581
535	0.0005848	28	306	22	584
536	0.000781	10	292	20	574
537	0.0006779	10	302	25	594
538	0.000629	12	309	29	606
539	0.0005706	2	300	26	598
540	0.00077	2	297	26	592
541	0.0007982	20	292	22	564
542	0.0006512	4	299	22	594
543	0.0005438	12	305	23	598
544	0.0008064	17	308	24	599
545	0.0005973	2	310	27	618
546	0.0005835	0	289	23	578
547	0.000648	17	304	27	591
548	0.0006169	4	303	26	602
549	0.0006669	2	296	26	590
550	0.0006634	6	306	28	606
551	0.0007726	14	311	27	608
552	0.0008282	7	296	23	585
553	0.0005364	13	298	21	583
554	0.0006207	15	313	25	611
555	0.0006484	5	304	26	603
556	0.0007826	11	295	27	579
557	0.0005854	5	295	22	585
558	0.0006904	24	308	26	592
559	0.0005789	4	302	23	600
560	0.0007068	7	299	29	591
561	0.0008075	13	311	25	609
562	0.0007908	19	305	25	591
563	0.0007513	12	302	24	592
564	0.0006707	3	309	25	615
565	0.000636	14	308	23	602
566	0.0007684	28	309	23	590
567	0.0005843	7	292	22	577
568	0.0007488	8	311	24	614
569	0.0007516	48	330	25	612
570	0.0005907	12	297	24	582
571	0.0005907	2	300	26	598
572	0.000655	13	311	27	609
573	0.0007837	14	297	22	580
574	0.0006144	11	297	24	583
575	0.0006489	13	298	23	583
576	0.000625	33	319	24	605
577	0.0008474	12	301	29	590
578	0.0007629	15	302	25	589
579	0.0007778	20	301	23	582
580	0.0007562	9	304	24	599
581	0.0008167	4	311	21	618
582	0.0005918	4	294	27	584
583	0.0006516	17	313	29	609
584	0.0007802	34	331	24	628
585	0.0006216	2	304	24	606
586	0.0006379	6	305	23	604
587	0.0008144	27	309	23	591
588	0.0005855	38	306	23	574
589	0.0005646	8	288	19	568
590	0.0007693	10	299	29	588
591	0.0006268	10	301	29	592
592	0.0006313	8	301	23	594
593	0.0005904	7	300	23	593
594	0.0005924	15	306	26	597
595	0.0007125	34	305	22	576
596	0.0007781	18	309	20	600
597	0.0007927	15	310	25	605
598	0.0007896	10	305	22	600
599	0.0005263	2	283	24	564
600	0.000685	12	298	29	584
601	0.000819	17	316	25	615
602	0.0006951	1	300	23	599
603	0.0005961	13	305	26	597
604	0.0007787	30	318	24	606
605	0.0007478	4	308	27	612
606	0.0005554	3	296	21	589
607	0.0005807	6	297	25	588
608	0.0007565	23	299	23	575
609	0.0006051	13	293	22	573
610	0.0005738	3	297	24	591
611	0.0007942	4	313	26	622
612	0.0007809	13	312	26	611
613	0.0006761	25	327	25	629
614	0.000733	47	323	26	599
615	0.0006278	5	295	24	585
616	0.0006894	3	307	25	611
617	0.0007842	8	298	21	588
618	0.000624	12	312	23	612
619	0.0008079	32	317	25	602
620	0.0007957	28	315	25	602
621	0.0006588	4	306	26	608
622	0.0008887	1	306	24	611
623	0.0005054	0	291	20	582
624	0.0005773	2	285	24	568
625	0.00069	2	289	27	576
626	0.0008036	13	292	22	571
627	0.0006476	9	300	24	591
628	0.0007603	8	310	22	612
629	0.0005837	12	299	24	586
630	0.0007837	9	299	23	589
631	0.000633	29	304	26	579
632	0.000662	0	297	21	594
633	0.0008117	7	295	22	583
634	0.0007503	11	297	24	583
635	0.0007755	14	303	23	592
636	0.0007608	12	294	28	576
637	0.0005668	1	280	21	559
638	0.0007862	6	289	26	572
639	0.0007726	7	302	27	597
640	0.0007898	9	296	23	583
641	0.0007668	14	298	22	582
642	0.0008089	23	316	26	609
643	0.0006342	5	294	24	583
644	0.0007704	14	301	27	588
645	0.0009592	7	302	22	597
646	0.0008081	11	293	24	575
647	0.0006366	2	291	22	580
648	0.0006111	14	301	24	588
649	0.0007852	12	305	25	598
650	0.0005935	0	291	22	582
651	0.0005848	8	296	24	584
652	0.0007951	12	299	28	586
653	0.0007682	17	319	29	621
654	0.0005999	10	302	24	594
655	0.0006194	3	305	22	607
656	0.0006501	3	303	23	603
657	0.0005925	5	299	22	593
658	0.0006341	1	303	25	605
659	0.0007634	9	306	21	603
660	0.0006359	1	310	22	619
661	0.0005723	0	303	29	606
662	0.0008901	10	312	27	614
663	0.0008082	42	328	28	614
664	0.0005695	6	297	26	588
665	0.0005482	3	291	23	579
666	0.0006286	36	310	25	584
667	0.0007207	6	288	29	570
668	0.0007609	9	314	23	619
669	0.0005569	1	286	25	571
670	0.0006372	4	296	23	588
671	0.0005963	9	301	27	593
672	0.000642	5	309	25	613
673	0.0007735	27	321	26	615
674	0.0006225	15	302	23	589
675	0.0008036	7	306	23	605
676	0.0007129	10	304	21	598
677	0.0006475	16	313	26	610
678	0.0007927	9	303	29	597
679	0.0006037	12	293	23	574
680	0.0008165	42	329	24	616
681	0.0007764	11	289	27	567
682	0.0005514	3	294	21	585
683	0.0005924	23	305	27	587
684	0.0008365	21	305	26	589
685	0.0006724	2	292	24	582
686	0.0006237	4	302	28	600
687	0.0005833	13	301	24	589
688	0.0005899	8	289	23	570
689	0.0007693	7	299	24	591
690	0.0005635	1	292	27	583
691	0.0007953	13	310	25	607
692	0.0006066	6	313	26	620
693	0.0005963	7	307	24	607
694	0.0008294	12	315	21	618
695	0.0006528	1	300	21	599
696	0.0007757	6	299	24	592
697	0.0008651	11	304	27	597
698	0.0007767	29	304	21	579
699	0.000867	5	297	24	589
700	0.000736	36	308	22	580
701	0.000633	2	295	27	588
702	0.0007609	57	343	28	629
703	0.0006347	6	297	26	588
704	0.0005043	1	290	20	579
705	0.0005503	1	299	24	597
706	0.0006022	5	295	24	585
707	0.0008039	12	300	26	588
708	0.0006305	10	310	24	610
709	0.0005905	1	297	23	593
710	0.000857	9	300	23	591
711	0.0008534	4	314	25	624
712	0.000803	32	316	22	600
713	0.0006878	9	295	22	581
714	0.0008239	13	304	26	595
715	0.0008799	22	311	26	600
716	0.0005656	12	287	25	562
717	0.0007829	13	305	25	597
718	0.0007778	22	321	25	620
719	0.0005828	6	296	25	586
720	0.0008147	9	301	22	593
721	0.000793	18	301	25	584
722	0.0006314	21	313	24	605
723	0.0008097	18	303	24	588
724	0.0006493	2	299	22	596
725	0.0005835	0	285	26	570
726	0.0007917	16	315	26	614
727	0.0005895	9	296	22	583
728	0.0006545	3	288	20	573
729	0.0005618	0	282	27	564
730	0.0006567	8	301	23	594
731	0.0007787	27	310	24	593
732	0.0007903	10	297	21	584
733	0.0007924	5	292	25	579
734	0.0006203	7	301	24	595
735	0.0007889	10	302	25	594
736	0.000648	1	309	27	617
737	0.0020232	6	300	22	594
738	0.0006547	9	295	20	581
739	0.0008058	16	317	23	618
740	0.0005879	6	285	24	564
741	0.0008376	11	291	28	571
742	0.0005389	4	310	22	616
743	0.0006309	30	322	29	614
744	0.0007691	26	308	23	590
745	0.000653	3	295	23	587
746	0.0006177	7	312	23	617
747	0.0006005	1	299	22	597
748	0.0005541	5	302	20	599
749	0.0007731	14	302	23	590
750	0.0005574	2	305	23	608
751	0.000653	3	300	22	597
752	0.0006358	28	294	22	560
753	0.000769	23	304	22	585
754	0.0006514	4	301	26	598
755	0.0008016	8	302	26	596
756	0.0005775	15	292	29	569
757	0.0005977	35	319	21	603
758	0.0007676	7	310	29	613
759	0.0005988	6	300	24	594
760	0.0005878	4	298	24	592
761	0.0006096	4	304	21	604
762	0.0009549	5	310	23	615
763	0.0006567	3	304	24	605
764	0.0006676	5	312	24	619
765	0.00062	1	288	22	575
766	0.0007639	13	307	24	601
767	0.0005252	1	288	20	575
768	0.0005893	0	293	24	586
769	0.0005349	3	287	23	571
770	0.0005616	1	295	24	589
771	0.0006502	1	300	26	599
772	0.0007935	10	308	28	606
773	0.0005655	4	297	29	590
774	0.0006503	9	297	22	585
775	0.0007697	21	304	28	587
776	0.0005975	12	292	23	572
777	0.0006084	14	299	26	584
778	0.0006391	0	301	23	602
779	0.0007614	12	305	24	598
780	0.0005547	0	299	23	598
781	0.0006356	47	326	25	605
782	0.0005743	15	304	24	593
783	0.0007786	23	313	25	603
784	0.0005827	6	283	22	560
785	0.000775	8	300	24	592
786	0.0008337	14	310	21	606
787	0.0008577	17	292	22	567
788	0.000794	10	300	24	590
789	0.0005923	7	286	27	565
790	0.0006066	2	294	24	586
791	0.0007902	16	292	20	568
792	0.0007665	28	320	25	612
793	0.0007523	2	302	22	602
794	0.0005646	24	300	26	576
795	0.0008371	15	300	20	585
796	0.0008186	21	321	27	621
797	0.0006316	35	326	24	617
798	0.0005975	9	304	24	599
799	0.0005927	13	303	22	593
800	0.0007692	16	302	25	588
801	0.0005262	1	287	22	573
802	0.0005522	5	298	21	591
803	0.0006102	5	294	24	583
804	0.0005767	0	302	22	604
805	0.0006264	40	329	27	618
806	0.0007619	9	306	21	603
807	0.0008134	8	300	24	592
808	0.0006323	11	302	23	593
809	0.000599	7	299	23	591
810	0.0008114	6	307	26	608
811	0.0005906	3	305	27	607
812	0.0005996	2	303	26	604
813	0.0005546	2	285	28	568
814	0.0005134	4	297	22	590
815	0.0007706	21	317	26	613
816	0.0005797	12	297	20	582
817	0.0005381	1	286	21	571
818	0.0007672	8	298	29	588
819	0.000777	15	295	21	575
820	0.0006657	8	285	24	562
821	0.0006144	2	291	22	580
822	0.0006195	7	305	25	603
823	0.0006537	0	314	28	628
824	0.0008792	12	315	25	618
825	0.0007787	27	306	22	585
826	0.0006715	4	292	24	580
827	0.0005232	0	288	20	576
828	0.0006493	16	310	22	604
829	0.0006886	4	307	28	610
830	0.0006368	1	309	25	617
831	0.0007718	16	318	22	620
832	0.0007553	18	291	25	564
833	0.0007026	13	305	28	597
834	0.0006308	22	303	24	584
835	0.0006209	1	300	23	599
836	0.0006561	2	298	22	594
837	0.0007757	10	306	29	602
838	0.0005911	7	286	26	565
839	0.0008112	15	307	22	599
840	0.0007513	11	302	29	593
841	0.0006141	7	300	21	593
842	0.0007604	13	309	25	605
843	0.0007446	16	290	24	564
844	0.0006402	2	302	29	602
845	0.000603	16	306	25	596
846	0.000633	3	291	23	579
847	0.0007773	10	297	28	584
848	0.0007575	7	292	24	577
849	0.0006446	5	290	27	575
850	0.0007729	8	288	25	568
851	0.0005955	2	306	26	610
852	0.0005997	7	295	24	583
853	0.0006616	4	303	22	602
854	0.0007381	4	300	22	596
855	0.0005615	1	293	20	585
856	0.0007687	40	311	26	582
857	0.0005701	5	294	24	583
858	0.000783	19	311	25	603
859	0.0006256	1	288	21	575
860	0.0005783	1	292	24	583
861	0.0007034	1	300	19	599
862	0.0006464	32	303	24	574
863	0.0008014	8	300	27	592
864	0.0007837	13	315	26	617
865	0.0006085	1	310	22	619
866	0.0006101	26	310	26	594
867	0.0007422	29	318	29	607
868	0.0005757	0	301	27	602
869	0.0007832	12	312	27	612
870	0.0006113	11	303	26	595
871	0.0005806	7	278	21	549
872	0.0008297	24	317	26	610
873	0.0005824	21	312	22	603
874	0.0007595	16	298	20	580
875	0.0008224	8	307	28	606
876	0.0007783	11	307	24	603
877	0.0007521	7	305	21	603
878	0.0005647	14	301	25	588
879	0.0007689	30	342	28	654
880	0.0007065	2	294	26	586
881	0.0007436	50	322	28	594
882	0.0007687	16	318	25	620
883	0.0008261	13	301	29	589
884	0.0008299	13	313	22	613
885	0.0007885	9	297	22	585
886	0.0007557	12	305	26	598
887	0.0009347	24	332	25	640
888	0.0006201	1	299	22	597
889	0.0007613	11	290	26	569
890	0.0006042	28	318	22	608
891	0.0007001	9	296	27	583
892	0.0007834	7	310	26	613
893	0.0006299	13	317	28	621
894	0.0006703	4	306	23	608
895	0.0005737	1	296	23	591
896	0.0005953	12	301	23	590
897	0.0005848	2	287	20	572
898	0.0004981	3	296	19	589
899	0.000587	1	303	28	605
900	0.0005645	4	299	27	594
901	0.0008782	9	302	22	595
902	0.0007749	6	305	22	604
903	0.000597	5	303	21	601
904	0.0005877	8	305	27	602
905	0.0007753	9	300	23	591
906	0.0007591	9	300	22	591
907	0.0005558	6	291	19	576
908	0.0005605	6	285	24	564
909	0.0006059	3	310	25	617
910	0.0007837	7	297	23	587
911	0.0007581	17	308	25	599
912	0.0007866	15	308	23	601
913	0.0006134	0	306	25	612
914	0.0007152	9	304	24	599
915	0.000783	6	312	24	618
916	0.0005604	3	282	24	561
917	0.0007686	5	293	27	581
918	0.0007968	8	295	26	582
919	0.0005657	0	305	26	610
920	0.0007912	6	289	21	572
921	0.0006061	2	298	22	594
922	0.0006358	0	288	22	576
923	0.0005974	4	297	29	590
924	0.0005266	5	292	25	579
925	0.0005675	6	305	23	604
926	0.0007429	3	297	22	591
927	0.0006317	13	298	22	583
928	0.0006311	3	301	23	599
929	0.0007826	24	326	27	628
930	0.0005426	27	300	22	573
931	0.000877	20	301	23	582
932	0.000651	4	308	26	612
933	0.000776	10	294	26	578
934	0.0006015	0	288	22	576
935	0.0007868	13	310	22	607
936	0.0007726	22	312	29	602
937	0.0006818	19	317	23	615
938	0.0006471	0	308	22	616
939	0.0006596	2	298	23	594
940	0.0007842	9	298	27	587
941	0.0006846	2	302	26	602
942	0.0007954	14	305	23	596
943	0.000779	7	309	29	611
944	0.0005196	1	283	24	565
945	0.0007877	8	304	22	600
946	0.000769	15	316	27	617
947	0.0007753	13	293	28	573
948	0.0005371	10	294	27	578
949	0.0005968	2	302	22	602
950	0.0007757	11	301	27	591
951	0.0006222	13	318	27	623
952	0.0007443	7	309	26	611
953	0.0006804	4	304	24	604
954	0.0009404	27	306	23	585
955	0.0006285	2	300	24	598
956	0.0006481	9	303	24	597
957	0.0006339	5	292	23	579
958	0.0005636	1	297	28	593
959	0.0007808	10	308	26	606
960	0.0007468	11	295	27	579
961	0.0008155	14	308	28	602
962	0.0007312	11	315	27	619
963	0.0007604	8	297	20	586
964	0.000808	13	304	26	595
965	0.0008184	11	286	19	561
966	0.0008992	6	308	25	610
967	0.000576	3	307	27	611
968	0.0006371	8	294	28	580
969	0.0007636	15	302	24	589
970	0.0007932	11	307	22	603
971	0.0008176	12	308	24	604
972	0.0006395	4	296	23	588
973	0.0006038	7	295	26	583
974	0.0007712	7	301	25	595
975	0.0007652	23	304	28	585
976	0.0005775	20	298	20	576
977	0.0007967	17	313	27	609
978	0.0006414	3	293	20	583
979	0.0007586	6	306	29	606
980	0.0007776	21	310	25	599
981	0.0006829	0	290	23	580
982	0.0007684	18	308	29	598
983	0.0007971	10	312	27	614
984	0.0006076	3	309	25	615
985	0.0005882	6	296	25	586
986	0.000569	0	301	26	602
987	0.0008384	8	307	26	606
988	0.0006417	20	303	27	586
989	0.0005534	8	292	22	576
990	0.0006292	8	310	22	612
991	0.0006747	3	314	26	625
992	0.0007634	24	314	28	604
993	0.0008371	11	305	23	599
994	0.0007581	62	328	26	594
995	0.0005365	8	297	23	586
996	0.0007617	5	290	26	575
997	0.0008107	12	304	24	596
998	0.0007809	20	329	28	638
999	0.000626	5	299	29	593
mean	0.000697859	11.049	302.487	24.379	593.925

## Sheet: PowerBalance_Bal
	time	SEq	Bal	Reg	Egal
0	0.0006608	4	307	24	610
1	0.0005912	24	313	22	602
2	0.0007567	19	300	25	581
3	0.000567	19	297	24	575
4	0.0005902	9	303	22	597
5	0.0005987	1	312	22	623
6	0.0006245	1	295	22	589
7	0.0007732	33	320	23	607
8	0.0008181	39	328	26	617
9	0.0007978	14	299	22	584
10	0.0005684	2	301	27	600
11	0.0008036	13	306	22	599
12	0.0007692	4	321	24	638
13	0.0008241	23	317	28	611
14	0.0008083	12	303	19	594
15	0.0006719	15	307	26	599
16	0.0008384	45	325	27	605
17	0.0006622	1	290	23	579
18	0.000736	6	310	27	614
19	0.000785	10	302	20	594
20	0.0008411	12	316	23	620
21	0.0007914	14	305	25	596
22	0.0007649	6	299	24	592
23	0.000756	15	302	27	589
24	0.0008158	11	301	25	591
25	0.0007749	2	300	22	598
26	0.0005548	1	292	25	583
27	0.0006347	5	300	23	595
28	0.0005251	7	294	20	581
29	0.0006739	4	305	27	606
30	0.0005439	13	301	26	589
31	0.000653	24	300	23	576
32	0.0007574	14	306	25	598
33	0.0006483	4	306	25	608
34	0.0006737	1	318	25	635
35	0.0007941	18	298	23	578
36	0.0007668	9	294	25	579
37	0.0006084	8	300	25	592
38	0.0007593	11	303	29	595
39	0.000551	2	299	23	596
40	0.0005814	4	294	25	584
41	0.0006252	34	311	24	588
42	0.0006851	3	308	26	613
43	0.0005728	2	287	27	572
44	0.0008275	11	315	24	619
45	0.0008113	19	300	21	581
46	0.0007657	12	306	28	600
47	0.0006447	8	304	24	600
48	0.0006382	4	296	26	588
49	0.0007603	5	308	26	611
50	0.00061	18	303	27	588
51	0.0006502	1	307	27	613
52	0.0005221	13	287	22	561
53	0.0006005	21	296	26	571
54	0.0006264	4	285	25	566
55	0.0005653	3	297	28	591
56	0.0005751	8	296	22	584
57	0.0007673	7	312	24	617
58	0.000504	6	290	19	574
59	0.0006514	9	296	21	583
60	0.0005786	3	297	23	591
61	0.0006703	4	316	27	628
62	0.0005135	2	288	20	574
63	0.0006268	5	293	27	581
64	0.0007352	5	293	24	581
65	0.000486	0	289	20	578
66	0.0007556	23	310	23	597
67	0.0006142	1	305	24	609
68	0.0005965	4	294	23	584
69	0.0006218	8	291	27	574
70	0.000768	18	301	24	584
71	0.0005889	0	295	23	590
72	0.0007692	7	298	27	589
73	0.0007744	12	304	28	596
74	0.0008821	6	319	27	632
75	0.0006176	10	298	20	586
76	0.0007874	45	322	26	599
77	0.0007567	18	298	23	578
78	0.0007792	7	296	24	585
79	0.000771	29	316	22	603
80	0.0005943	7	300	19	593
81	0.0006433	4	308	26	612
82	0.0008511	13	299	27	585
83	0.0005981	2	294	22	586
84	0.000821	14	298	20	582
85	0.0007778	4	299	21	594
86	0.0005367	4	300	21	596
87	0.0007578	9	299	22	589
88	0.0005958	1	297	21	593
89	0.0008737	17	298	22	579
90	0.0005654	6	301	23	596
91	0.0006534	20	308	25	596
92	0.0006208	0	294	22	588
93	0.0006219	6	300	22	594
94	0.0006017	1	296	25	591
95	0.0007389	22	300	21	578
96	0.0005166	4	281	26	558
97	0.0005528	7	303	25	599
98	0.0006611	2	292	24	582
99	0.0007468	9	304	25	599
100	0.0005952	10	289	21	568
101	0.0008243	11	315	25	619
102	0.0005579	3	285	24	567
103	0.0005007	1	295	22	589
104	0.0008914	23	315	28	607
105	0.000622	1	296	24	591
106	0.0006068	7	299	22	591
107	0.0006958	7	293	22	579
108	0.0007663	10	302	22	594
109	0.0008026	3	305	29	607
110	0.0007452	12	288	29	564
111	0.0008137	15	309	24	603
112	0.000768	17	302	22	587
113	0.000769	6	297	21	588
114	0.0006632	0	299	20	598
115	0.0007813	14	301	27	588
116	0.0008483	10	304	21	598
117	0.0007046	26	313	28	600
118	0.0011254	7	300	25	593
119	0.0006501	1	309	24	617
120	0.0006121	5	299	23	593
121	0.0005463	2	290	23	578
122	0.0006031	7	291	23	575
123	0.0006149	2	296	20	590
124	0.0006914	3	300	26	597
125	0.0007928	14	306	21	598
126	0.0007549	16	295	24	574
127	0.0006179	4	297	25	590
128	0.00056	10	289	21	568
129	0.0007857	23	316	23	609
130	0.0007864	18	305	24	592
131	0.0006928	10	306	24	602
132	0.0007633	12	304	26	596
133	0.0007687	14	302	23	590
134	0.0006352	0	301	28	602
135	0.0008091	10	297	21	584
136	0.0008015	11	301	24	591
137	0.0007475	9	304	24	599
138	0.0006806	5	301	28	597
139	0.0007558	27	300	29	573
140	0.0007654	8	306	26	604
141	0.0005752	3	295	25	587
142	0.0006423	10	303	24	596
143	0.0006324	2	300	26	598
144	0.0005325	6	300	21	594
145	0.0007695	18	320	25	622
146	0.0007586	9	291	24	573
147	0.0007446	66	343	29	620
148	0.0007607	41	318	28	595
149	0.000614	6	295	20	584
150	0.0008219	8	314	24	620
151	0.0006323	1	291	21	581
152	0.0007619	14	297	20	580
153	0.0005761	8	293	22	578
154	0.0008286	29	319	29	609
155	0.0006697	7	295	24	583
156	0.0006228	9	308	26	607
157	0.0005187	5	291	23	577
158	0.000989	6	302	26	598
159	0.0007377	6	295	22	584
160	0.0008174	25	301	22	577
161	0.0006084	8	302	25	596
162	0.0005835	12	299	25	586
163	0.0006784	2	309	25	616
164	0.000589	16	304	26	592
165	0.0007564	14	313	26	612
166	0.0005177	0	282	19	564
167	0.0006693	0	293	24	586
168	0.0005925	0	284	26	568
169	0.0006009	2	285	27	568
170	0.0006047	4	301	25	598
171	0.0005978	1	288	26	575
172	0.0007651	11	289	20	567
173	0.0007574	19	300	20	581
174	0.0007953	7	295	21	583
175	0.0007733	17	300	22	583
176	0.0006245	52	322	26	592
177	0.0007681	11	312	28	613
178	0.0006398	8	306	23	604
179	0.0005621	4	301	21	598
180	0.0008083	18	315	28	612
181	0.0006793	7	310	25	613
182	0.000587	1	313	24	625
183	0.0005771	7	304	29	601
184	0.0007814	16	307	25	598
185	0.0007332	20	303	24	586
186	0.0007481	3	304	27	605
187	0.0007723	32	318	27	604
188	0.0008178	18	305	25	592
189	0.0007873	7	294	25	581
190	0.0005456	1	285	23	569
191	0.0007854	20	301	25	582
192	0.0007873	17	304	25	591
193	0.0007791	8	305	28	602
194	0.0005925	4	294	24	584
195	0.0008737	10	323	29	636
196	0.0005735	0	307	27	614
197	0.0007582	16	314	25	612
198	0.000807	16	314	24	612
199	0.0008349	39	323	22	607
200	0.0006229	17	308	25	599
201	0.0005538	6	295	25	584
202	0.0007791	13	294	29	575
203	0.0006052	6	299	27	592
204	0.0006632	4	306	23	608
205	0.000752	21	302	28	583
206	0.0006223	7	304	27	601
207	0.0007863	6	300	24	594
208	0.0005843	5	312	25	619
209	0.0007547	10	308	25	606
210	0.000794	12	306	26	600
211	0.000567	4	302	26	600
212	0.0007893	16	299	21	582
213	0.0008437	12	296	25	580
214	0.0006372	0	299	29	598
215	0.0009829	12	317	27	622
216	0.0007907	24	296	29	568
217	0.0006365	45	329	29	613
218	0.0007675	23	302	23	581
219	0.0007933	28	302	29	576
220	0.0007951	14	302	21	590
221	0.0006439	6	307	25	608
222	0.0007599	11	298	23	585
223	0.0005923	0	289	25	578
224	0.0006422	19	312	25	605
225	0.0008284	10	308	25	606
226	0.0005985	9	311	29	613
227	0.0005971	7	295	23	583
228	0.0007489	13	298	21	583
229	0.0007671	9	315	29	621
230	0.0006373	19	306	24	593
231	0.0008218	24	317	29	610
232	0.0005483	2	290	24	578
233	0.0007644	7	305	25	603
234	0.0006502	5	311	24	617
235	0.0005832	1	296	21	591
236	0.0007684	13	324	23	635
237	0.0006374	5	300	22	595
238	0.000503	2	289	19	576
239	0.0007727	12	303	24	594
240	0.0006375	27	304	27	581
241	0.0007644	4	309	27	614
242	0.0006197	7	317	27	627
243	0.0006355	1	310	23	619
244	0.0007967	15	310	24	605
245	0.0007698	5	303	25	601
246	0.000581	8	299	22	590
247	0.0007748	4	304	26	604
248	0.000592	4	294	20	584
249	0.0007929	12	296	24	580
250	0.0005812	0	289	23	578
251	0.0006659	17	299	27	581
252	0.0005588	4	288	26	572
253	0.0008076	16	291	22	566
254	0.0006171	25	303	24	581
255	0.0006901	6	300	28	594
256	0.0006139	9	292	23	575
257	0.0008106	33	312	28	591
258	0.0007749	14	296	29	578
259	0.0007995	44	324	22	604
260	0.0006475	1	304	28	607
261	0.0007704	14	302	27	590
262	0.0005947	14	285	20	556
263	0.0008266	9	285	23	561
264	0.0006755	2	298	25	594
265	0.0006546	12	306	26	600
266	0.0007862	20	305	22	590
267	0.000806	20	313	24	606
268	0.000747	8	304	26	600
269	0.0007845	11	299	25	587
270	0.0007448	21	315	26	609
271	0.0005745	10	288	22	566
272	0.0007874	12	297	26	582
273	0.0005999	21	309	25	597
274	0.0009037	18	298	27	578
275	0.0007636	22	315	28	608
276	0.000647	1	304	23	607
277	0.0007895	14	316	23	618
278	0.0007794	11	307	28	603
279	0.0008109	21	303	21	585
280	0.0007519	10	292	21	574
281	0.0005333	7	306	24	605
282	0.0005712	3	291	23	579
283	0.0007839	8	294	20	580
284	0.0005762	1	293	25	585
285	0.00077	34	320	26	606
286	0.0006195	9	305	24	601
287	0.0006142	1	296	26	591
288	0.0006399	21	298	22	575
289	0.0006377	22	306	23	590
290	0.0008154	14	299	23	584
291	0.000791	21	302	28	583
292	0.00063	12	303	22	594
293	0.0007339	4	287	22	570
294	0.0008145	9	307	26	605
295	0.0007792	9	315	24	621
296	0.0007576	33	309	25	585
297	0.0005301	2	288	24	574
298	0.0007769	3	304	21	605
299	0.0006311	15	300	28	585
300	0.0007318	1	281	20	561
301	0.000646	7	297	22	587
302	0.0006653	9	300	28	591
303	0.0007871	20	307	21	594
304	0.0005903	4	295	20	586
305	0.0007532	8	289	19	570
306	0.0006446	20	309	25	598
307	0.000535	1	295	27	589
308	0.0005489	2	298	23	594
309	0.0005782	0	283	26	566
310	0.000627	10	288	21	566
311	0.0006971	2	293	26	584
312	0.0006961	7	313	24	619
313	0.000825	21	303	23	585
314	0.0005454	9	296	23	583
315	0.0008082	5	300	26	595
316	0.000594	5	299	22	593
317	0.0008084	9	298	19	587
318	0.0005955	3	291	22	579
319	0.0007824	3	299	24	595
320	0.000769	15	320	28	625
321	0.0006654	1	303	23	605
322	0.0007591	26	303	23	580
323	0.0007761	14	295	20	576
324	0.00083	17	319	25	621
325	0.000772	34	311	22	588
326	0.0007812	31	313	25	595
327	0.0005071	4	291	20	578
328	0.0006214	10	312	28	614
329	0.0006823	4	296	23	588
330	0.000534	3	297	21	591
331	0.0007263	52	331	29	610
332	0.0005825	29	313	23	597
333	0.0005269	4	299	23	594
334	0.0005345	1	294	24	587
335	0.0007968	26	320	26	614
336	0.0006577	5	288	23	571
337	0.0005956	12	305	24	598
338	0.0006182	31	313	24	595
339	0.0007887	17	303	22	589
340	0.0006154	3	298	22	593
341	0.0008217	20	317	26	614
342	0.0005235	4	297	23	590
343	0.0005602	1	295	21	589
344	0.0007247	15	319	26	623
345	0.0008323	27	306	20	585
346	0.0008558	12	305	29	598
347	0.0005888	3	290	27	577
348	0.0007599	9	300	26	591
349	0.0005489	11	297	22	583
350	0.0007194	2	311	23	620
351	0.0007641	10	302	29	594
352	0.0007979	12	310	24	608
353	0.0006057	0	296	26	592
354	0.0005524	2	295	21	588
355	0.0005875	1	301	22	601
356	0.0007382	8	305	23	602
357	0.0008179	7	303	21	599
358	0.0007871	7	303	28	599
359	0.0006862	2	302	23	602
360	0.0006449	16	298	26	580
361	0.000533	7	290	24	573
362	0.0005756	3	288	26	573
363	0.0005771	5	292	26	579
364	0.0007265	3	295	26	587
365	0.0005205	2	299	23	596
366	0.0005837	15	293	21	571
367	0.0007606	19	319	28	619
368	0.0005955	28	298	24	568
369	0.0006446	3	305	28	607
370	0.0007736	10	306	22	602
371	0.0008251	15	299	25	583
372	0.0005518	6	294	20	582
373	0.0008403	40	324	28	608
374	0.0007683	34	314	23	594
375	0.0007812	16	296	27	576
376	0.0005901	4	303	23	602
377	0.0007691	13	308	27	603
378	0.0008254	18	307	28	596
379	0.0008216	20	317	26	614
380	0.000658	9	303	25	597
381	0.0007528	9	294	24	579
382	0.0007914	8	301	23	594
383	0.0008222	2	301	27	600
384	0.0006113	5	300	24	595
385	0.0007407	8	298	22	588
386	0.0006273	30	305	21	580
387	0.000775	11	301	23	591
388	0.0005865	3	295	23	587
389	0.0007592	8	301	27	594
390	0.0012631	7	305	22	603
391	0.0007019	7	302	27	597
392	0.0007795	30	319	27	608
393	0.0007774	18	306	24	594
394	0.0006711	14	315	27	616
395	0.0006889	21	292	25	563
396	0.0008228	14	302	24	590
397	0.000812	8	294	27	580
398	0.0006066	0	302	26	604
399	0.0007616	16	301	25	586
400	0.0005667	14	294	25	574
401	0.0006839	10	302	25	594
402	0.0005989	1	299	27	597
403	0.0008272	8	320	28	632
404	0.0008381	9	308	22	607
405	0.0007361	19	294	25	569
406	0.0006611	6	311	25	616
407	0.0007651	97	353	28	609
408	0.0005891	19	317	29	615
409	0.0005182	8	294	22	580
410	0.0006067	1	292	22	583
411	0.0007653	26	321	27	616
412	0.0007672	11	307	27	603
413	0.000589	5	299	22	593
414	0.0007783	16	305	22	594
415	0.0005411	1	283	22	565
416	0.0007859	10	305	23	600
417	0.0008046	11	310	23	609
418	0.0007213	1	308	25	615
419	0.0006007	5	302	25	599
420	0.0006469	5	307	26	609
421	0.0007873	20	310	28	600
422	0.0008165	14	296	25	578
423	0.0005935	2	301	23	600
424	0.000662	5	317	27	629
425	0.0007907	11	307	26	603
426	0.0005064	5	287	22	569
427	0.0007031	12	309	24	606
428	0.000775	29	310	27	591
429	0.0007478	15	305	25	595
430	0.0007644	21	288	22	555
431	0.0006188	19	311	25	603
432	0.0007632	6	313	26	620
433	0.0007985	12	305	26	598
434	0.0008025	33	327	23	621
435	0.0007602	9	311	23	613
436	0.0008241	13	304	22	595
437	0.0007795	13	300	22	587
438	0.0007736	18	300	28	582
439	0.0005421	4	290	23	576
440	0.000809	9	313	27	617
441	0.0007736	25	320	23	615
442	0.0007935	12	308	24	604
443	0.0006681	14	291	23	568
444	0.0007727	11	294	27	577
445	0.0006473	41	310	25	579
446	0.0006456	0	312	27	624
447	0.0006502	5	311	29	617
448	0.0008128	6	304	29	602
449	0.0006742	2	297	28	592
450	0.0007641	15	306	26	597
451	0.0006626	13	288	20	563
452	0.0006247	22	318	25	614
453	0.0009226	8	313	28	618
454	0.0007565	5	295	27	585
455	0.0007823	7	315	29	623
456	0.0005687	6	292	24	578
457	0.0008009	16	307	29	598
458	0.0007439	13	312	25	611
459	0.0006035	1	297	26	593
460	0.0007663	16	310	26	604
461	0.000587	9	292	23	575
462	0.0005176	7	296	22	585
463	0.0006225	44	316	22	588
464	0.0007789	6	303	26	600
465	0.0008511	7	306	29	605
466	0.0006053	7	300	19	593
467	0.0005962	30	299	23	568
468	0.0008152	9	303	24	597
469	0.0005821	19	290	22	561
470	0.0005777	2	301	27	600
471	0.0006319	19	298	23	577
472	0.0005999	5	287	25	569
473	0.0008593	20	310	28	600
474	0.0007709	20	312	24	604
475	0.0007707	10	285	22	560
476	0.0005393	1	291	23	581
477	0.0006262	3	293	24	583
478	0.0007975	16	308	26	600
479	0.0005812	9	304	25	599
480	0.0005722	4	292	19	580
481	0.0005662	10	296	22	582
482	0.0006204	8	305	28	602
483	0.0005673	1	294	23	587
484	0.0006244	1	279	23	557
485	0.0008205	6	305	24	604
486	0.000588	5	296	24	587
487	0.0007356	1	293	22	585
488	0.0006039	21	309	26	597
489	0.0008301	12	304	26	596
490	0.000673	3	301	23	599
491	0.0006335	36	311	25	586
492	0.0007717	22	311	26	600
493	0.0007898	35	318	24	601
494	0.0007653	4	296	26	588
495	0.0007891	3	294	28	585
496	0.0008382	14	304	22	594
497	0.0006055	14	313	25	612
498	0.0007674	13	306	27	599
499	0.0005531	2	298	21	594
500	0.0007631	19	306	22	593
501	0.0007801	12	304	23	596
502	0.0006056	26	314	25	602
503	0.0006972	3	300	24	597
504	0.000782	4	306	25	608
505	0.0007632	5	290	21	575
506	0.0007642	7	303	25	599
507	0.0005325	1	289	25	577
508	0.0005835	3	308	28	613
509	0.0005982	1	312	28	623
510	0.0007671	6	297	27	588
511	0.0006537	6	295	27	584
512	0.0006517	4	287	26	570
513	0.000633	37	306	23	575
514	0.0006189	33	324	22	615
515	0.0006043	2	286	25	570
516	0.0007205	14	286	22	558
517	0.0006092	3	295	20	587
518	0.0006679	2	305	21	608
519	0.0006324	27	299	29	571
520	0.0007814	4	303	25	602
521	0.0007651	23	305	27	587
522	0.0007556	22	308	28	594
523	0.0007667	7	301	26	595
524	0.0007519	18	321	28	624
525	0.0006407	4	291	24	578
526	0.0008207	22	306	24	590
527	0.0006535	9	304	27	599
528	0.0006112	6	294	22	582
529	0.0006155	3	287	21	571
530	0.0007939	16	304	25	592
531	0.0008115	12	299	21	586
532	0.000583	4	286	21	568
533	0.0005418	1	301	26	601
534	0.0006192	3	292	24	581
535	0.0005845	28	306	22	584
536	0.0007561	10	292	20	574
537	0.000628	10	302	25	594
538	0.0005967	12	309	29	606
539	0.0005821	2	300	26	598
540	0.0007766	2	297	26	592
541	0.0007491	20	292	22	564
542	0.0006675	4	299	22	594
543	0.0005164	12	305	23	598
544	0.0008191	20	305	24	590
545	0.000634	2	310	27	618
546	0.0006779	0	289	23	578
547	0.0005752	17	304	27	591
548	0.0006142	4	303	26	602
549	0.000776	2	296	26	590
550	0.0007971	6	306	28	606
551	0.0007618	16	307	24	598
552	0.0006858	7	296	23	585
553	0.000534	13	298	21	583
554	0.0006519	15	313	25	611
555	0.0006408	5	304	26	603
556	0.000761	26	304	25	582
557	0.0006519	5	295	22	585
558	0.0006479	24	308	26	592
559	0.000608	4	302	23	600
560	0.0005956	7	299	29	591
561	0.0007917	13	311	25	609
562	0.0007734	19	305	25	591
563	0.0007639	12	302	24	592
564	0.0005464	3	309	25	615
565	0.0005991	14	308	23	602
566	0.0007692	28	309	23	590
567	0.0005572	7	292	22	577
568	0.0007726	8	311	24	614
569	0.0007713	48	330	25	612
570	0.0005871	12	297	24	582
571	0.0006447	2	300	26	598
572	0.0006547	13	311	27	609
573	0.0007524	14	297	22	580
574	0.0006089	11	297	24	583
575	0.0006369	13	298	23	583
576	0.0006202	33	319	24	605
577	0.0007901	12	301	29	590
578	0.0007666	15	302	25	589
579	0.0008221	20	301	23	582
580	0.000825	9	304	24	599
581	0.000789	4	311	21	618
582	0.0006024	4	294	27	584
583	0.0006221	17	313	29	609
584	0.000814	34	331	24	628
585	0.0006187	2	304	24	606
586	0.0006006	6	305	23	604
587	0.0007953	27	309	23	591
588	0.0005854	38	306	23	574
589	0.0005721	8	288	19	568
590	0.0007573	10	299	29	588
591	0.0006501	10	301	29	592
592	0.0006496	8	301	23	594
593	0.0005382	7	300	23	593
594	0.0005758	15	306	26	597
595	0.0006102	34	305	22	576
596	0.0007918	18	309	20	600
597	0.000828	15	305	25	595
598	0.0007846	10	305	22	600
599	0.0005379	2	283	24	564
600	0.0006348	12	298	29	584
601	0.000808	17	316	25	615
602	0.000816	23	310	23	597
603	0.0005948	13	305	26	597
604	0.0007858	30	318	24	606
605	0.0007804	4	308	27	612
606	0.0005637	3	296	21	589
607	0.0005937	6	297	25	588
608	0.0006152	23	299	23	575
609	0.0006084	13	293	22	573
610	0.0006503	3	297	24	591
611	0.0007894	4	313	26	622
612	0.0007521	13	312	26	611
613	0.0006354	25	327	25	629
614	0.0007225	47	323	26	599
615	0.0006389	5	295	24	585
616	0.0006234	3	307	25	611
617	0.0008123	8	298	21	588
618	0.0007793	11	310	23	609
619	0.0007992	32	317	25	602
620	0.000785	28	315	25	602
621	0.0006787	4	306	26	608
622	0.0007877	1	306	24	611
623	0.000505	0	291	20	582
624	0.0005886	2	285	24	568
625	0.0006872	2	289	27	576
626	0.0007544	13	292	22	571
627	0.0006796	9	300	24	591
628	0.0007918	8	310	22	612
629	0.000555	12	299	24	586
630	0.0007514	9	299	23	589
631	0.0006135	29	304	26	579
632	0.0006151	0	297	21	594
633	0.0007569	7	295	22	583
634	0.0007663	11	297	24	583
635	0.0008265	14	303	23	592
636	0.0007628	12	294	28	576
637	0.0005842	1	280	21	559
638	0.0007824	6	289	26	572
639	0.0007689	7	302	27	597
640	0.0008432	9	296	23	583
641	0.0007705	14	298	22	582
642	0.0007417	23	316	26	609
643	0.000805	5	294	24	583
644	0.0007574	16	300	22	584
645	0.0007876	8	302	22	596
646	0.0009176	11	293	24	575
647	0.0006878	2	291	22	580
648	0.0006333	14	301	24	588
649	0.0011879	12	305	25	598
650	0.0005768	0	291	22	582
651	0.0005903	8	296	24	584
652	0.0007891	12	299	28	586
653	0.0008379	17	319	29	621
654	0.0005516	10	302	24	594
655	0.0006179	3	305	22	607
656	0.0006725	3	303	23	603
657	0.0006131	5	299	22	593
658	0.0006905	1	303	25	605
659	0.0007432	17	305	23	593
660	0.0006008	1	310	22	619
661	0.000583	0	303	29	606
662	0.0008041	10	312	27	614
663	0.0007658	42	328	28	614
664	0.0005461	6	297	26	588
665	0.0005249	3	291	23	579
666	0.000614	36	310	25	584
667	0.0006219	6	288	29	570
668	0.0007555	9	314	23	619
669	0.0005273	1	286	25	571
670	0.0005879	4	296	23	588
671	0.0005812	9	301	27	593
672	0.0006525	5	309	25	613
673	0.0007645	35	319	22	603
674	0.0006245	15	302	23	589
675	0.0008001	8	305	23	602
676	0.0007613	10	304	21	598
677	0.0006764	16	313	26	610
678	0.0008046	9	303	29	597
679	0.000608	12	293	23	574
680	0.0007994	42	329	24	616
681	0.000771	11	289	27	567
682	0.0005647	3	294	21	585
683	0.0005992	23	305	27	587
684	0.0007571	21	305	26	589
685	0.0006111	2	292	24	582
686	0.0006328	4	302	28	600
687	0.0005692	13	301	24	589
688	0.0008052	8	289	23	570
689	0.0007777	7	299	24	591
690	0.0005781	1	292	27	583
691	0.0008043	22	308	22	594
692	0.000637	6	313	26	620
693	0.0005872	7	307	24	607
694	0.0007765	12	315	21	618
695	0.000615	1	300	21	599
696	0.0007881	6	299	24	592
697	0.0007516	11	304	27	597
698	0.0007821	30	302	21	574
699	0.0007909	5	297	24	589
700	0.0007909	36	308	22	580
701	0.0006062	2	295	27	588
702	0.0007398	57	343	28	629
703	0.0006421	6	297	26	588
704	0.0005092	1	290	20	579
705	0.0006309	1	299	24	597
706	0.0005955	5	295	24	585
707	0.0007993	23	298	19	573
708	0.0006218	10	310	24	610
709	0.0006023	1	297	23	593
710	0.0008652	9	300	23	591
711	0.0007717	4	314	25	624
712	0.0007821	33	316	28	599
713	0.000721	9	295	22	581
714	0.0007801	13	304	26	595
715	0.0007559	27	308	23	589
716	0.0005525	12	287	25	562
717	0.0007704	13	305	25	597
718	0.0007745	22	321	25	620
719	0.0006424	6	296	25	586
720	0.0007541	9	301	22	593
721	0.0007616	18	301	25	584
722	0.0006182	21	313	24	605
723	0.0008528	24	300	22	576
724	0.0006515	2	299	22	596
725	0.0005818	0	285	26	570
726	0.0007753	20	314	26	608
727	0.0006199	9	296	22	583
728	0.00067	3	288	20	573
729	0.0005425	0	282	27	564
730	0.0005821	8	301	23	594
731	0.0007517	27	310	24	593
732	0.0007723	10	297	21	584
733	0.0007648	11	290	22	569
734	0.0007709	10	304	24	598
735	0.0007753	10	302	25	594
736	0.0006366	1	309	27	617
737	0.0005409	6	300	22	594
738	0.000638	9	295	20	581
739	0.0007919	19	313	22	607
740	0.0006153	6	285	24	564
741	0.0007578	11	291	28	571
742	0.0007589	4	310	22	616
743	0.0006813	30	322	29	614
744	0.0007653	26	308	23	590
745	0.0006332	3	295	23	587
746	0.0006531	7	312	23	617
747	0.000609	1	299	22	597
748	0.0005481	5	302	20	599
749	0.0007694	14	302	23	590
750	0.0005737	2	305	23	608
751	0.0004984	3	300	22	597
752	0.0006911	28	294	22	560
753	0.0007931	26	299	23	572
754	0.0006846	4	301	26	598
755	0.0007973	10	297	27	584
756	0.0005974	15	292	29	569
757	0.0005962	35	319	21	603
758	0.0007434	7	310	29	613
759	0.0006068	6	300	24	594
760	0.0006433	4	298	24	592
761	0.0006228	4	304	21	604
762	0.0007855	5	310	23	615
763	0.0005959	3	304	24	605
764	0.000654	5	312	24	619
765	0.0005465	1	288	22	575
766	0.0007554	11	302	24	593
767	0.0006618	1	288	20	575
768	0.0005366	0	293	24	586
769	0.0005511	3	287	23	571
770	0.0006238	1	295	24	589
771	0.0006555	1	300	26	599
772	0.0007682	10	308	28	606
773	0.0006377	4	297	29	590
774	0.0006562	9	297	22	585
775	0.0008134	21	304	28	587
776	0.0006162	12	292	23	572
777	0.0006556	14	299	26	584
778	0.0006418	0	301	23	602
779	0.0007679	14	305	27	596
780	0.0005591	0	299	23	598
781	0.000642	47	326	25	605
782	0.0006048	15	304	24	593
783	0.0007727	23	313	25	603
784	0.0005547	6	283	22	560
785	0.000598	8	300	24	592
786	0.0007968	14	310	21	606
787	0.0007752	17	292	22	567
788	0.0008041	10	300	24	590
789	0.0006056	7	286	27	565
790	0.0005977	2	294	24	586
791	0.0007437	16	292	20	568
792	0.0007612	28	320	25	612
793	0.000643	2	302	22	602
794	0.0005762	24	300	26	576
795	0.000775	15	300	20	585
796	0.0007818	22	313	28	604
797	0.0006745	35	326	24	617
798	0.0006649	9	304	24	599
799	0.0006264	1	300	22	599
800	0.0007549	18	300	25	582
801	0.0005173	1	287	22	573
802	0.0005543	5	298	21	591
803	0.0005921	5	294	24	583
804	0.0005213	0	302	22	604
805	0.0006493	40	329	27	618
806	0.0008034	9	306	21	603
807	0.0007966	9	300	24	591
808	0.0006292	11	302	23	593
809	0.0006356	7	299	23	591
810	0.0007655	6	307	26	608
811	0.0005717	3	305	27	607
812	0.0006143	2	303	26	604
813	0.000548	2	285	28	568
814	0.0005088	4	297	22	590
815	0.0011476	21	317	26	613
816	0.0005647	12	297	20	582
817	0.0005194	1	286	21	571
818	0.0007945	8	298	29	588
819	0.000884	15	295	21	575
820	0.0007573	8	285	24	562
821	0.0005663	2	291	22	580
822	0.0006208	7	305	25	603
823	0.0006264	0	314	28	628
824	0.000651	12	315	25	618
825	0.0008011	27	306	22	585
826	0.0006512	4	292	24	580
827	0.0005487	0	288	20	576
828	0.0006417	16	310	22	604
829	0.0006635	4	307	28	610
830	0.0006367	1	309	25	617
831	0.0007787	16	318	22	620
832	0.0007695	18	291	25	564
833	0.0006693	13	305	28	597
834	0.0007312	22	303	24	584
835	0.0006142	1	300	23	599
836	0.0006778	2	298	22	594
837	0.000774	10	306	29	602
838	0.000574	7	286	26	565
839	0.0007469	15	307	22	599
840	0.0009276	11	302	29	593
841	0.0006318	7	300	21	593
842	0.0007639	18	306	24	594
843	0.0008118	16	290	24	564
844	0.0006637	2	302	29	602
845	0.0006066	16	306	25	596
846	0.0005193	3	291	23	579
847	0.000771	18	296	21	574
848	0.0008311	7	292	24	577
849	0.0006067	5	290	27	575
850	0.0007707	13	286	19	559
851	0.0005999	2	306	26	610
852	0.0005849	7	295	24	583
853	0.0006834	4	303	22	602
854	0.0007765	4	300	22	596
855	0.0006435	1	293	20	585
856	0.0006189	40	311	26	582
857	0.0006144	5	294	24	583
858	0.0007908	19	311	25	603
859	0.0005958	1	288	21	575
860	0.0005447	1	292	24	583
861	0.0006413	1	300	19	599
862	0.0005972	32	303	24	574
863	0.0008012	8	300	27	592
864	0.0007745	13	315	26	617
865	0.0006934	1	310	22	619
866	0.0005754	26	310	26	594
867	0.0007631	29	318	29	607
868	0.0006128	0	301	27	602
869	0.0007813	12	312	27	612
870	0.0006318	11	303	26	595
871	0.0005434	7	278	21	549
872	0.0007866	26	314	25	602
873	0.0005894	21	312	22	603
874	0.0007463	16	298	20	580
875	0.0007605	8	307	28	606
876	0.0007774	11	307	24	603
877	0.0009553	7	305	21	603
878	0.0005975	14	301	25	588
879	0.0008112	30	342	28	654
880	0.0007782	2	294	26	586
881	0.0008189	50	322	28	594
882	0.0007816	16	318	25	620
883	0.0008795	13	301	29	589
884	0.0007163	13	313	22	613
885	0.0007458	9	297	22	585
886	0.0007617	12	305	26	598
887	0.000772	29	328	24	627
888	0.0005328	1	299	22	597
889	0.0007747	11	290	26	569
890	0.0005724	28	318	22	608
891	0.0005783	9	296	27	583
892	0.0008356	7	310	26	613
893	0.0006374	13	317	28	621
894	0.000668	4	306	23	608
895	0.0006462	1	296	23	591
896	0.0005982	12	301	23	590
897	0.000563	2	287	20	572
898	0.0005035	3	296	19	589
899	0.0005916	1	303	28	605
900	0.0005602	4	299	27	594
901	0.0008034	9	302	22	595
902	0.000781	6	305	22	604
903	0.0006622	5	303	21	601
904	0.0005813	8	305	27	602
905	0.0007881	9	300	23	591
906	0.0008107	9	300	22	591
907	0.0005394	6	291	19	576
908	0.0005346	6	285	24	564
909	0.0006747	3	310	25	617
910	0.0008121	7	297	23	587
911	0.0008904	17	308	25	599
912	0.0007586	15	308	23	601
913	0.000662	0	306	25	612
914	0.000671	9	304	24	599
915	0.0006091	6	312	24	618
916	0.0005615	3	282	24	561
917	0.0007787	7	292	27	577
918	0.0007777	14	294	26	574
919	0.0005518	0	305	26	610
920	0.0008441	6	289	21	572
921	0.0006405	2	298	22	594
922	0.0006868	0	288	22	576
923	0.0005358	4	297	29	590
924	0.000541	5	292	25	579
925	0.0005922	6	305	23	604
926	0.0006343	3	297	22	591
927	0.00064	13	298	22	583
928	0.000609	3	301	23	599
929	0.0007637	24	326	27	628
930	0.0005698	27	300	22	573
931	0.0007888	20	301	23	582
932	0.0006868	4	308	26	612
933	0.0007476	10	294	26	578
934	0.000601	0	288	22	576
935	0.000753	13	310	22	607
936	0.0008448	22	312	29	602
937	0.0006463	19	317	23	615
938	0.0006398	0	308	22	616
939	0.0007008	2	298	23	594
940	0.0008037	16	298	27	580
941	0.0006334	2	302	26	602
942	0.0007751	15	303	23	591
943	0.0008168	7	309	29	611
944	0.0005201	1	283	24	565
945	0.0008584	8	304	22	600
946	0.0007737	15	316	27	617
947	0.000789	13	293	28	573
948	0.0006518	10	294	27	578
949	0.0005278	2	302	22	602
950	0.000771	11	301	27	591
951	0.0007952	13	318	27	623
952	0.0007424	7	309	26	611
953	0.0006184	4	304	24	604
954	0.0007946	27	306	23	585
955	0.0005797	2	300	24	598
956	0.0006087	9	303	24	597
957	0.0006131	5	292	23	579
958	0.0005852	1	297	28	593
959	0.000778	10	308	26	606
960	0.0007596	11	295	27	579
961	0.0007441	20	305	25	590
962	0.0007496	11	315	27	619
963	0.0008003	8	297	20	586
964	0.0008108	13	304	26	595
965	0.0007536	11	286	19	561
966	0.0007733	6	308	25	610
967	0.0005696	3	307	27	611
968	0.0006346	8	294	28	580
969	0.0007511	17	301	23	585
970	0.000951	12	307	27	602
971	0.0007508	4	307	24	610
972	0.0006542	4	296	23	588
973	0.0006802	7	295	26	583
974	0.0006742	7	301	25	595
975	0.0007606	23	304	28	585
976	0.000572	20	298	20	576
977	0.0007553	17	313	27	609
978	0.0005972	3	293	20	583
979	0.0008954	18	303	22	588
980	0.0007587	21	310	25	599
981	0.0006825	0	290	23	580
982	0.000766	18	308	29	598
983	0.0007989	10	312	27	614
984	0.0006164	3	309	25	615
985	0.000582	6	296	25	586
986	0.0005817	0	301	26	602
987	0.0007553	21	306	20	591
988	0.0006661	20	303	27	586
989	0.0005667	8	292	22	576
990	0.0006265	8	310	22	612
991	0.0005713	3	314	26	625
992	0.0007871	25	311	28	597
993	0.0008091	11	305	23	599
994	0.0007423	62	328	26	594
995	0.0005245	8	297	23	586
996	0.0008748	5	290	26	575
997	0.0007763	12	304	24	596
998	0.0008173	22	325	25	628
999	0.0007641	5	299	29	593
mean	0.000692992	11.344	302.301	24.32	593.258
