# Supplementary material
Source: ML conference proceedings conference paper supplement (https://openreview.net/forum?id=2rAiDBJgR_)
Supplement: supplementary_material [file GG_size-20_test.xlsx]

## Sheet: GS_MaleOpt
	time	SEq	Bal	Reg	Egal
0	0.000173	53	117	19	181
1	0.0001796	18	109	16	200
2	0.000178	36	106	14	176
3	0.0001615	56	129	17	202
4	0.0001723	12	109	19	206
5	0.0001718	1	102	16	203
6	0.0002031	20	120	19	220
7	0.000395	8	110	16	212
8	0.0001674	32	117	19	202
9	0.0001661	34	114	17	194
10	0.0001862	80	151	19	222
11	0.0001978	39	129	16	219
12	0.0001911	29	101	18	173
13	0.0001712	67	121	19	175
14	0.0001978	60	135	18	210
15	0.0001841	36	131	18	226
16	0.0001861	75	124	18	173
17	0.0001687	4	84	19	164
18	0.0001789	9	105	17	201
19	0.0001679	22	102	17	182
20	0.0001733	0	99	19	198
21	0.0001877	2	109	18	216
22	0.0001805	2	102	17	202
23	0.0001641	50	127	19	204
24	0.0001692	54	128	19	202
25	0.0001795	11	113	17	215
26	0.0001775	3	90	18	177
27	0.0001603	53	127	16	201
28	0.0002144	53	134	17	215
29	0.0002607	36	136	18	236
30	0.0002226	36	114	19	192
31	0.0001884	23	117	17	211
32	0.0001927	12	107	18	202
33	0.0001685	22	92	14	162
34	0.0001818	22	113	17	204
35	0.0002182	35	94	17	153
36	0.0002226	13	115	16	217
37	0.0001732	52	113	17	174
38	0.0002124	2	102	19	202
39	0.0001818	32	113	19	194
40	0.0001706	24	127	17	230
41	0.000171	10	91	15	172
42	0.0001741	0	98	19	196
43	0.0002095	61	139	19	217
44	0.0003968	1	108	18	215
45	0.0001692	1	83	15	165
46	0.0001816	24	91	13	158
47	0.0001794	29	118	19	207
48	0.0001743	12	108	16	204
49	0.0002273	2	121	17	240
50	0.0001805	43	116	17	189
51	0.0001927	15	110	18	205
52	0.0001724	6	89	13	172
53	0.0001918	11	109	19	207
54	0.0001768	38	110	19	182
55	0.0001599	70	137	19	204
56	0.000167	40	132	19	224
57	0.0001677	3	115	16	227
58	0.0002338	14	97	16	180
59	0.0001811	1	109	18	217
60	0.0001814	49	120	17	191
61	0.0001748	8	116	17	224
62	0.0001684	16	103	19	190
63	0.000184	10	102	16	194
64	0.0001857	1	112	18	223
65	0.0001708	15	99	19	183
66	0.0001763	5	103	18	201
67	0.000168	10	94	18	178
68	0.0001744	53	123	14	193
69	0.000176	52	126	18	200
70	0.0001786	7	103	19	199
71	0.000183	58	132	17	206
72	0.0001823	12	108	18	204
73	0.0001818	45	127	18	209
74	0.0001847	57	120	16	183
75	0.0001955	44	107	17	170
76	0.0002146	37	122	19	207
77	0.0001721	8	85	18	162
78	0.0001799	4	97	19	190
79	0.0001828	44	116	17	188
80	0.0001619	48	110	15	172
81	0.0001836	29	104	17	179
82	0.0001768	29	109	17	189
83	0.0001813	42	107	14	172
84	0.0002062	3	100	15	197
85	0.0001907	1	88	18	175
86	0.0001626	35	115	17	195
87	0.0001664	23	105	18	187
88	0.0002081	30	122	18	214
89	0.0003248	55	130	17	205
90	0.0001736	55	121	18	187
91	0.0002259	16	107	15	198
92	0.0001931	31	108	18	185
93	0.0002073	38	117	17	196
94	0.0001848	35	117	17	199
95	0.0001648	9	88	14	167
96	0.0002204	21	110	16	199
97	0.0001708	55	136	16	217
98	0.0001717	22	107	14	192
99	0.0001812	15	95	13	175
100	0.0002689	28	107	19	186
101	0.0001852	7	101	19	195
102	0.0001968	1	94	19	187
103	0.0001574	85	149	19	213
104	0.0001701	59	119	16	179
105	0.0001649	43	112	17	181
106	0.0001698	27	109	19	191
107	0.0002078	23	104	17	185
108	0.000186	34	111	19	188
109	0.0001674	62	132	18	202
110	0.0001767	16	104	15	192
111	0.0001739	15	105	19	195
112	0.0001975	21	101	18	181
113	0.0001797	59	131	18	203
114	0.0001692	47	129	17	211
115	0.000197	3	103	19	203
116	0.0001788	43	132	17	221
117	0.0001699	20	103	19	186
118	0.0001832	15	117	18	219
119	0.0001908	16	101	16	186
120	0.0001827	15	96	18	177
121	0.0001792	2	112	17	222
122	0.0001855	31	96	18	161
123	0.0001668	44	122	17	200
124	0.0001648	63	132	19	201
125	0.0001767	62	128	15	194
126	0.0001677	11	115	19	219
127	0.0001796	46	131	18	216
128	0.0001735	22	112	17	202
129	0.0002009	50	146	19	242
130	0.0001795	48	134	18	220
131	0.0001996	56	125	16	194
132	0.0001793	47	109	18	171
133	0.0001794	31	134	17	237
134	0.0001666	53	128	14	203
135	0.0001839	41	115	15	189
136	0.0001921	10	112	19	214
137	0.0001801	1	106	18	211
138	0.000175	29	116	19	203
139	0.00018	19	113	15	207
140	0.0002052	47	126	18	205
141	0.0001883	56	142	18	228
142	0.0001791	32	117	18	202
143	0.0001819	1	105	18	209
144	0.0002167	2	77	17	152
145	0.0001675	68	150	19	232
146	0.0001735	5	94	17	183
147	0.0001816	53	127	17	201
148	0.0001728	15	107	19	199
149	0.0001582	46	110	18	174
150	0.0001733	33	134	18	235
151	0.0001744	30	119	19	208
152	0.0001981	25	105	19	185
153	0.0001712	32	104	17	176
154	0.0001882	26	117	16	208
155	0.0001657	84	149	18	214
156	0.0001792	2	96	18	190
157	0.0001924	5	101	18	197
158	0.0001804	18	99	17	180
159	0.0001734	29	117	16	205
160	0.0002108	18	100	15	182
161	0.000177	0	95	18	190
162	0.0001737	12	93	13	174
163	0.0001734	35	112	15	189
164	0.0001943	8	111	19	214
165	0.0001771	7	100	15	193
166	0.0001788	41	140	19	239
167	0.0001673	38	128	16	218
168	0.0001628	5	78	16	151
169	0.0001682	31	114	15	197
170	0.0001789	13	87	15	161
171	0.0001833	8	99	19	190
172	0.000191	39	126	17	213
173	0.000183	12	105	15	198
174	0.0001659	76	135	19	194
175	0.0002098	56	129	18	202
176	0.0002005	40	119	17	198
177	0.0001904	42	119	18	196
178	0.0001788	45	115	19	185
179	0.0001638	62	125	19	188
180	0.0001746	24	121	17	218
181	0.0001699	40	120	16	200
182	0.0001796	36	116	18	196
183	0.0001732	9	99	19	189
184	0.000186	5	108	18	211
185	0.0001848	11	89	17	167
186	0.0001869	23	106	17	189
187	0.0001902	14	113	17	212
188	0.0002085	22	122	18	222
189	0.0001707	18	104	15	190
190	0.0001795	2	101	17	200
191	0.0001826	74	153	18	232
192	0.0001762	1	100	15	199
193	0.0001654	41	127	19	213
194	0.0001945	15	121	17	227
195	0.000157	37	112	18	187
196	0.0001887	14	114	18	214
197	0.0001935	29	102	13	175
198	0.0001861	58	127	19	196
199	0.0002091	32	121	19	210
200	0.0002237	31	122	19	213
201	0.0001699	33	107	18	181
202	0.0001882	25	105	16	185
203	0.0002114	42	109	17	176
204	0.0001751	57	130	18	203
205	0.0001927	35	127	19	219
206	0.0001791	4	100	16	196
207	0.0001849	10	116	17	222
208	0.0001755	4	108	16	212
209	0.0001794	31	106	19	181
210	0.0001841	1	101	16	201
211	0.0002022	1	99	17	197
212	0.0001937	3	100	15	197
213	0.0001742	5	84	14	163
214	0.0001872	14	111	19	208
215	0.0002171	10	103	17	196
216	0.0001893	12	110	18	208
217	0.0001758	24	113	19	202
218	0.0002291	22	107	18	192
219	0.000171	28	99	15	170
220	0.000184	7	103	17	199
221	0.0002789	33	119	18	205
222	0.0001654	24	99	18	174
223	0.0001782	10	95	17	180
224	0.0001695	26	113	19	200
225	0.0001906	17	105	16	193
226	0.000161	76	148	18	220
227	0.0001745	58	143	16	228
228	0.0001693	37	113	16	189
229	0.0001718	32	111	16	190
230	0.0001815	35	110	16	185
231	0.0001712	44	115	16	186
232	0.0001784	17	108	18	199
233	0.0001728	18	106	19	194
234	0.0001804	40	119	17	198
235	0.0001819	28	110	19	192
236	0.000174	56	134	19	212
237	0.0001879	30	117	18	204
238	0.0002101	10	94	17	178
239	0.0001728	51	120	17	189
240	0.0001689	24	108	17	192
241	0.0001727	9	105	19	201
242	0.0001722	11	85	17	159
243	0.0001888	25	109	16	193
244	0.0001809	15	107	18	199
245	0.0001784	36	108	17	180
246	0.0001617	41	103	18	165
247	0.0002014	4	111	18	218
248	0.0001781	34	107	19	180
249	0.0001871	56	126	15	196
250	0.0001789	31	116	17	201
251	0.0001958	67	138	17	209
252	0.0001778	23	108	17	193
253	0.0001815	37	106	18	175
254	0.0001854	36	118	14	200
255	0.0001792	14	110	17	206
256	0.0001808	0	109	18	218
257	0.0001742	11	98	14	185
258	0.0001905	19	104	18	189
259	0.0001801	16	94	17	172
260	0.0001712	27	113	16	199
261	0.0001886	23	119	19	215
262	0.0001731	48	128	19	208
263	0.000177	14	117	18	220
264	0.0001787	17	108	19	199
265	0.0002225	24	125	19	226
266	0.000166	32	121	19	210
267	0.0002067	24	98	18	172
268	0.000182	1	113	19	225
269	0.0001592	62	125	18	188
270	0.0001667	16	101	18	186
271	0.0001761	29	107	14	185
272	0.0002256	72	128	17	184
273	0.0001818	15	110	19	205
274	0.0001765	17	114	17	211
275	0.0001738	74	114	17	154
276	0.0001898	36	116	17	196
277	0.0001719	27	102	19	177
278	0.0001869	13	110	19	207
279	0.000189	28	108	17	188
280	0.0001742	13	100	15	187
281	0.0001933	41	119	18	197
282	0.0001944	15	107	17	199
283	0.000183	43	111	12	179
284	0.0001894	22	100	16	178
285	0.000206	27	107	16	187
286	0.0001729	39	124	19	209
287	0.0002087	53	116	19	179
288	0.0001787	37	132	18	227
289	0.0001744	39	118	19	197
290	0.00017	4	83	14	162
291	0.0001776	38	129	18	220
292	0.0001975	3	96	19	189
293	0.0002029	9	90	17	171
294	0.0001898	69	136	19	203
295	0.0001804	41	129	17	217
296	0.0002412	14	108	19	202
297	0.0001872	14	107	17	200
298	0.0002233	14	96	19	178
299	0.0001656	33	109	17	185
300	0.0001821	13	114	17	215
301	0.0001673	59	125	16	191
302	0.0002271	16	107	16	198
303	0.0001762	2	94	17	186
304	0.000161	59	124	19	189
305	0.0001732	4	80	15	156
306	0.0001691	68	137	18	206
307	0.0001949	17	108	18	199
308	0.0001803	9	103	19	197
309	0.0001983	46	121	18	196
310	0.0001821	3	83	19	163
311	0.0001865	18	109	18	200
312	0.0001763	39	114	19	189
313	0.0001889	14	119	18	224
314	0.0001991	2	90	17	178
315	0.0001744	3	104	18	205
316	0.0001772	33	105	14	177
317	0.0001827	4	95	18	186
318	0.0001797	4	90	19	176
319	0.0001713	29	111	17	193
320	0.0001676	12	105	16	198
321	0.0001974	32	108	18	184
322	0.0001692	56	146	19	236
323	0.0001732	55	120	18	185
324	0.0001885	20	107	16	194
325	0.0001763	42	109	16	176
326	0.0002029	40	115	19	190
327	0.0001813	49	124	18	199
328	0.0001996	39	120	19	201
329	0.0001909	48	116	18	184
330	0.0001713	4	97	19	190
331	0.0001735	1	90	15	179
332	0.0002012	16	101	15	186
333	0.0001688	28	109	18	190
334	0.0001886	64	126	18	188
335	0.0001642	56	128	18	200
336	0.0001812	86	147	19	208
337	0.0001993	31	131	17	231
338	0.0001878	15	103	17	191
339	0.0001698	41	135	18	229
340	0.0001972	8	109	19	210
341	0.000163	39	109	18	179
342	0.0001901	12	105	15	198
343	0.0002305	3	104	19	205
344	0.0001893	14	100	17	186
345	0.0001818	66	122	19	178
346	0.000162	15	89	15	163
347	0.0001647	27	112	18	197
348	0.0001626	58	125	19	192
349	0.000189	21	109	18	197
350	0.0001901	42	126	16	210
351	0.0001616	66	123	18	180
352	0.0001963	3	101	18	199
353	0.0002226	50	136	19	222
354	0.0001721	29	101	18	173
355	0.0001775	40	123	18	206
356	0.0001748	4	104	17	204
357	0.0002446	9	84	15	159
358	0.0001968	9	92	19	175
359	0.0001948	36	121	17	206
360	0.0001719	65	131	18	197
361	0.0002225	1	85	15	169
362	0.0001828	32	121	19	210
363	0.00019	8	90	13	172
364	0.0001701	60	125	18	190
365	0.0001766	57	131	19	205
366	0.000185	23	123	19	223
367	0.0001955	10	109	14	208
368	0.0001715	7	82	18	157
369	0.0002126	14	95	19	176
370	0.0001743	30	105	15	180
371	0.0001866	6	110	17	214
372	0.0001794	36	113	18	190
373	0.000178	34	105	19	176
374	0.0001953	14	95	17	176
375	0.0001836	16	97	17	178
376	0.0001791	23	107	19	191
377	0.0002052	17	90	19	163
378	0.0001776	59	121	16	183
379	0.0001911	11	113	17	215
380	0.0001744	77	133	18	189
381	0.0001744	15	115	19	215
382	0.0001957	5	110	19	215
383	0.000195	22	111	18	200
384	0.0001734	35	110	15	185
385	0.0001846	24	118	17	212
386	0.0001796	16	105	18	194
387	0.0002638	56	138	19	220
388	0.0001776	35	118	19	201
389	0.000169	63	132	15	201
390	0.000165	37	120	16	203
391	0.0002092	6	129	19	252
392	0.0001867	5	115	19	225
393	0.0001878	1	104	19	207
394	0.0001899	20	102	18	184
395	0.0001763	39	113	18	187
396	0.0001862	61	135	17	209
397	0.0002188	4	90	17	176
398	0.0001641	71	127	19	183
399	0.0001918	83	150	17	217
400	0.0002215	14	101	18	188
401	0.0001745	29	122	19	215
402	0.0002238	25	98	19	171
403	0.000169	23	115	17	207
404	0.0001779	33	120	19	207
405	0.0001808	22	101	18	180
406	0.0002113	13	124	18	235
407	0.0001869	0	95	15	190
408	0.000198	2	100	16	198
409	0.0001771	22	108	18	194
410	0.000175	23	122	17	221
411	0.0001713	17	98	17	179
412	0.0001817	4	97	17	190
413	0.0001996	28	123	19	218
414	0.0001783	45	114	19	183
415	0.0001979	6	105	17	204
416	0.0001768	23	108	16	193
417	0.0002596	57	134	19	211
418	0.0001624	59	122	19	185
419	0.0001777	39	111	19	183
420	0.0002066	28	121	18	214
421	0.0001787	2	98	17	194
422	0.0001799	49	113	16	177
423	0.0002186	10	96	13	182
424	0.0001741	19	113	19	207
425	0.0002013	85	148	19	211
426	0.0001615	21	99	19	177
427	0.0001957	4	84	15	164
428	0.0001815	12	111	17	210
429	0.0001816	26	116	19	206
430	0.0001784	17	117	18	217
431	0.0001858	14	115	18	216
432	0.0001878	28	110	15	192
433	0.0001814	4	105	17	206
434	0.000172	46	116	18	186
435	0.0001863	2	90	18	178
436	0.000189	22	130	19	238
437	0.0001791	1	91	16	181
438	0.0001871	47	126	15	205
439	0.0001753	13	108	17	203
440	0.0001678	66	133	19	200
441	0.0001799	32	112	17	192
442	0.0001675	59	144	18	229
443	0.0001854	10	110	19	210
444	0.000203	7	111	18	215
445	0.0002006	44	127	18	210
446	0.0002038	21	111	18	201
447	0.0001739	3	96	16	189
448	0.0001739	29	115	17	201
449	0.000162	62	129	19	196
450	0.0001951	8	104	19	200
451	0.000176	22	100	15	178
452	0.000177	10	94	15	178
453	0.0002286	21	118	19	215
454	0.0001786	22	108	19	194
455	0.0001735	29	116	18	203
456	0.0001786	26	119	19	212
457	0.0001629	97	149	18	201
458	0.0001822	34	107	19	180
459	0.0001952	59	145	18	231
460	0.0001819	19	119	18	219
461	0.0001777	41	129	18	217
462	0.0001755	5	108	15	211
463	0.0001911	39	121	16	203
464	0.0001804	14	110	16	206
465	0.0001888	8	115	19	222
466	0.0001711	32	111	18	190
467	0.0001793	17	92	15	167
468	0.0001723	42	123	19	204
469	0.0002172	68	135	16	202
470	0.0001852	35	114	16	193
471	0.0001756	62	140	18	218
472	0.0002099	21	102	19	183
473	0.0001609	75	146	17	217
474	0.0002026	2	109	18	216
475	0.0001702	44	122	19	200
476	0.0003445	2	77	12	152
477	0.0001664	51	134	16	217
478	0.0002005	2	91	14	180
479	0.0001683	12	103	14	194
480	0.0001606	70	137	19	204
481	0.0002115	49	120	17	191
482	0.0001794	42	118	19	194
483	0.0001762	59	149	19	239
484	0.0001703	22	96	18	170
485	0.0001784	43	114	19	185
486	0.0002039	40	137	18	234
487	0.0001907	73	153	18	233
488	0.0002286	2	95	19	188
489	0.0001877	36	129	19	222
490	0.0002025	2	107	17	212
491	0.000172	55	136	18	217
492	0.0001774	41	127	18	213
493	0.0001836	85	144	17	203
494	0.000178	25	107	16	189
495	0.0001776	44	131	19	218
496	0.0001742	29	114	19	199
497	0.0001874	10	98	18	186
498	0.0001689	25	100	14	175
499	0.0001705	24	116	18	208
500	0.0001777	68	125	19	182
501	0.0001751	27	109	15	191
502	0.0001887	7	104	18	201
503	0.0001624	75	150	18	225
504	0.0001746	6	102	15	198
505	0.0002394	37	126	19	215
506	0.0002273	19	119	15	219
507	0.000186	35	141	19	247
508	0.0002183	9	89	17	169
509	0.0001669	8	106	17	204
510	0.0001905	12	113	19	214
511	0.0001748	1	88	16	175
512	0.0002447	34	118	19	202
513	0.0001694	35	114	17	193
514	0.0001791	44	118	17	192
515	0.0001758	24	106	14	188
516	0.0001624	59	126	19	193
517	0.0001894	14	96	18	178
518	0.0001823	47	124	18	201
519	0.0001701	4	91	19	178
520	0.0001793	1	99	19	197
521	0.0001767	64	137	19	210
522	0.0002132	37	113	17	189
523	0.0001665	30	114	18	198
524	0.0001764	14	103	16	192
525	0.0001741	27	103	17	179
526	0.0001757	5	113	16	221
527	0.0001756	2	87	15	172
528	0.0001769	18	98	13	178
529	0.0001644	36	111	16	186
530	0.0001821	31	110	17	189
531	0.0001918	8	110	18	212
532	0.0001675	48	120	17	192
533	0.0001716	1	80	15	159
534	0.0002056	80	159	18	238
535	0.0002241	51	121	19	191
536	0.000235	69	132	19	195
537	0.0002255	7	101	19	195
538	0.0002012	2	99	15	196
539	0.0001689	17	107	15	197
540	0.0001685	67	146	17	225
541	0.0001771	5	112	17	219
542	0.0002333	110	143	18	176
543	0.0001664	30	116	18	202
544	0.0001779	16	98	18	180
545	0.0001801	22	125	15	228
546	0.0001927	37	126	18	215
547	0.0001698	14	103	19	192
548	0.0001756	28	120	15	212
549	0.0001708	15	110	15	205
550	0.0001941	70	137	17	204
551	0.0001656	35	115	19	195
552	0.0001634	37	108	16	179
553	0.0001653	19	101	18	183
554	0.0001785	79	142	18	205
555	0.0001846	35	123	18	211
556	0.0001814	12	112	16	212
557	0.0001809	16	111	18	206
558	0.0001981	28	121	17	214
559	0.000195	39	115	17	191
560	0.0002044	61	140	16	219
561	0.0001872	14	97	18	180
562	0.0002681	11	99	18	187
563	0.0001678	18	101	16	184
564	0.0001835	56	122	18	188
565	0.0002023	59	131	18	203
566	0.000199	3	104	18	205
567	0.0001851	42	119	13	196
568	0.0001818	21	104	16	187
569	0.0001657	11	94	18	177
570	0.0001757	45	115	18	185
571	0.0001815	3	89	17	175
572	0.0001808	6	110	15	214
573	0.0001991	31	136	19	241
574	0.0001638	55	124	19	193
575	0.0001675	21	100	17	179
576	0.000186	13	107	14	201
577	0.000189	19	118	18	217
578	0.0002054	16	106	15	196
579	0.0002221	33	128	18	223
580	0.0001954	47	126	19	205
581	0.0001859	24	121	18	218
582	0.0001883	34	123	17	212
583	0.0001988	13	110	19	207
584	0.0001732	30	111	18	192
585	0.0001932	28	107	16	186
586	0.0002065	15	119	17	223
587	0.0002224	46	127	18	208
588	0.0001931	58	132	19	206
589	0.0002005	18	102	14	186
590	0.0002241	0	91	19	182
591	0.000183	42	121	16	200
592	0.0001942	2	107	19	212
593	0.0001948	12	118	18	224
594	0.0001706	6	101	18	196
595	0.0001659	60	129	16	198
596	0.0001956	38	125	19	212
597	0.0001989	25	127	19	229
598	0.0001584	101	143	18	185
599	0.0001743	58	124	14	190
600	0.0001873	55	121	19	187
601	0.0002142	49	114	17	179
602	0.0001844	15	104	19	193
603	0.0001739	35	115	15	195
604	0.0001744	66	137	18	208
605	0.0001739	19	107	18	195
606	0.0001752	62	138	18	214
607	0.0001958	5	113	16	221
608	0.0001755	23	106	17	189
609	0.0001861	15	119	18	223
610	0.0001871	7	100	16	193
611	0.0001931	16	114	18	212
612	0.0001811	3	98	16	193
613	0.0001667	65	142	19	219
614	0.0001707	17	102	18	187
615	0.0001863	51	118	18	185
616	0.0001703	35	122	17	209
617	0.0001656	37	117	16	197
618	0.000206	5	90	14	175
619	0.0001654	16	94	15	172
620	0.0001895	22	110	16	198
621	0.0002036	51	121	15	191
622	0.0001694	59	137	18	215
623	0.0001834	9	112	19	215
624	0.0001812	2	92	15	182
625	0.0001732	70	154	19	238
626	0.0001886	48	130	17	212
627	0.0001892	5	94	17	183
628	0.000185	33	110	17	187
629	0.000172	68	124	18	180
630	0.0001956	13	115	19	217
631	0.0001883	53	144	18	235
632	0.000178	18	115	18	212
633	0.0001924	8	89	15	170
634	0.0001816	2	105	19	208
635	0.0001868	2	96	16	190
636	0.0001923	20	114	18	208
637	0.0001755	17	109	16	201
638	0.0001634	20	92	17	164
639	0.0001854	5	105	19	205
640	0.0001672	37	120	19	203
641	0.0001774	17	106	18	195
642	0.000184	32	102	19	172
643	0.0001887	5	109	19	213
644	0.0001872	10	106	17	202
645	0.0001817	36	123	19	210
646	0.0002765	2	103	17	204
647	0.0001819	50	127	17	204
648	0.0001932	19	91	17	163
649	0.0002643	33	108	14	183
650	0.0001866	32	111	16	190
651	0.0001847	18	114	19	210
652	0.000205	57	138	18	219
653	0.0001764	30	107	17	184
654	0.0002334	27	103	19	179
655	0.0001921	79	142	18	205
656	0.000178	9	91	15	173
657	0.0002134	70	125	18	180
658	0.0001959	18	114	17	210
659	0.0001683	4	94	16	184
660	0.0002255	67	133	19	199
661	0.0001653	52	132	19	212
662	0.0001802	18	111	18	204
663	0.0001657	45	127	17	209
664	0.0001916	29	131	18	233
665	0.0002153	33	114	17	195
666	0.0001759	25	124	18	223
667	0.0001901	2	88	17	174
668	0.0001766	16	106	13	196
669	0.0001757	34	129	18	224
670	0.0001774	66	132	18	198
671	0.0001749	25	120	16	215
672	0.0001815	42	116	16	190
673	0.0001983	17	113	19	209
674	0.0001882	27	113	14	199
675	0.0001925	7	103	16	199
676	0.0002477	8	108	17	208
677	0.0001868	12	101	19	190
678	0.0001952	17	116	19	215
679	0.0002215	11	114	19	217
680	0.0001743	47	130	19	213
681	0.0001799	15	123	17	231
682	0.0001864	41	130	17	219
683	0.0001748	50	129	18	208
684	0.000178	5	95	16	185
685	0.0001788	31	107	15	183
686	0.0001775	70	130	16	190
687	0.0001747	10	111	18	212
688	0.0001719	22	97	18	172
689	0.0001876	12	111	19	210
690	0.0001713	4	84	17	164
691	0.0001805	21	116	19	211
692	0.0002126	48	123	17	198
693	0.0001877	7	104	17	201
694	0.0001931	17	109	17	201
695	0.0001896	28	114	17	200
696	0.0001955	22	102	19	182
697	0.0001977	25	128	17	231
698	0.0001889	37	121	19	205
699	0.0001689	3	87	15	171
700	0.0001852	21	105	17	189
701	0.0002264	0	107	17	214
702	0.0001799	13	103	19	193
703	0.0001998	5	99	19	193
704	0.0002274	6	94	19	182
705	0.0002439	46	124	17	202
706	0.0001772	86	156	17	226
707	0.0001955	5	100	17	195
708	0.0001899	21	107	16	193
709	0.0001723	14	105	18	196
710	0.0001807	37	103	15	169
711	0.0001741	94	152	19	210
712	0.0001637	45	117	19	189
713	0.0001962	11	108	16	205
714	0.0002025	41	127	17	213
715	0.0001918	26	119	16	212
716	0.0001835	64	139	19	214
717	0.0001753	56	122	19	188
718	0.0001703	1	94	15	187
719	0.0001682	18	103	18	188
720	0.0001724	58	139	18	220
721	0.000193	12	110	16	208
722	0.0001752	46	118	19	190
723	0.0002593	40	129	18	218
724	0.0001644	41	105	17	169
725	0.0001908	31	119	17	207
726	0.0002174	18	108	17	198
727	0.0001919	21	91	17	161
728	0.000186	24	111	16	198
729	0.0001789	42	112	15	182
730	0.0001749	13	85	19	157
731	0.0001823	29	122	19	215
732	0.0001803	13	121	19	229
733	0.0001694	12	99	19	186
734	0.0002203	38	111	19	184
735	0.0001712	6	91	19	176
736	0.0001647	67	135	17	203
737	0.000205	50	124	19	198
738	0.0001747	50	129	17	208
739	0.0001934	4	97	18	190
740	0.0001811	52	127	19	202
741	0.0001797	19	122	16	225
742	0.0002208	41	129	19	217
743	0.000197	31	114	15	197
744	0.000191	46	117	19	188
745	0.000177	44	132	18	220
746	0.0001653	11	94	16	177
747	0.0001855	42	120	16	198
748	0.0001848	64	124	16	184
749	0.0001845	45	125	18	205
750	0.000223	34	119	17	204
751	0.0001691	4	94	17	184
752	0.0001988	7	101	18	195
753	0.0001751	23	108	16	193
754	0.0001795	15	100	19	185
755	0.0001699	39	112	15	185
756	0.0001622	33	109	19	185
757	0.0001707	34	130	18	226
758	0.0001998	35	112	18	189
759	0.0001901	83	141	17	199
760	0.0001861	51	118	17	185
761	0.0002472	9	101	18	193
762	0.0001716	39	121	18	203
763	0.0001868	12	106	16	200
764	0.0001899	11	101	16	191
765	0.0002033	17	109	16	201
766	0.0001871	43	126	17	209
767	0.0001795	38	125	19	212
768	0.000186	7	111	18	215
769	0.0001934	24	116	19	208
770	0.0001802	41	113	18	185
771	0.0001778	13	102	17	191
772	0.0002414	16	100	19	184
773	0.0001852	19	110	19	201
774	0.000203	40	124	17	208
775	0.0001882	26	121	17	216
776	0.0001851	8	102	16	196
777	0.0001867	57	128	17	199
778	0.0002676	29	101	17	173
779	0.0001742	66	144	18	222
780	0.0001864	29	104	18	179
781	0.0001572	60	110	16	160
782	0.0002061	28	119	16	210
783	0.0001673	48	118	18	188
784	0.0002075	16	110	18	204
785	0.0002091	16	102	19	188
786	0.0002156	18	97	14	176
787	0.0001873	36	116	14	196
788	0.0001743	7	97	18	187
789	0.0001735	4	97	17	190
790	0.0002495	52	127	15	202
791	0.0001707	18	108	16	198
792	0.0001996	48	137	18	226
793	0.0001726	0	99	19	198
794	0.0001781	1	98	19	195
795	0.0002042	12	106	17	200
796	0.0001898	70	125	14	180
797	0.0001756	35	110	19	185
798	0.0001863	15	104	15	193
799	0.0001828	3	84	16	165
800	0.0002148	1	96	16	191
801	0.0001689	29	108	19	187
802	0.0001788	1	88	16	175
803	0.0001819	27	109	18	191
804	0.0001942	4	102	16	200
805	0.0001769	62	124	18	186
806	0.0001877	26	112	17	198
807	0.0001826	64	142	19	220
808	0.0001944	7	100	16	193
809	0.0001774	86	138	19	190
810	0.0001668	93	162	18	231
811	0.0001904	10	106	19	202
812	0.0001892	10	108	19	206
813	0.0001838	32	115	14	198
814	0.0001797	18	119	19	220
815	0.0001646	63	139	17	215
816	0.0001793	11	110	15	209
817	0.0001958	6	93	18	180
818	0.0001834	12	110	16	208
819	0.0001953	22	107	18	192
820	0.0001781	28	108	15	188
821	0.0001883	37	126	16	215
822	0.000175	5	103	19	201
823	0.0001922	56	128	19	200
824	0.0001748	43	135	18	227
825	0.0001854	2	98	19	194
826	0.0001674	23	92	17	161
827	0.0001711	36	118	19	200
828	0.0001775	40	125	17	210
829	0.0001945	28	108	18	188
830	0.0001956	17	129	18	241
831	0.0001812	53	136	17	219
832	0.0001733	3	101	19	199
833	0.0001995	2	103	18	204
834	0.0001791	24	109	19	194
835	0.0001939	28	120	19	212
836	0.0001922	17	105	14	193
837	0.0001777	36	113	17	190
838	0.0001722	44	126	18	208
839	0.0001688	57	128	18	199
840	0.000189	16	114	17	212
841	0.0001818	26	109	18	192
842	0.000169	50	108	19	166
843	0.0002275	25	108	19	191
844	0.0001705	26	98	18	170
845	0.000188	6	104	16	202
846	0.0001909	27	117	15	207
847	0.000185	36	119	19	202
848	0.0001957	27	115	19	203
849	0.0002102	16	123	16	230
850	0.0001783	37	128	19	219
851	0.000202	58	128	16	198
852	0.0001934	37	123	15	209
853	0.0001871	13	112	19	211
854	0.0001814	38	118	17	198
855	0.0001983	81	146	19	211
856	0.0001665	10	88	15	166
857	0.0002139	6	98	19	190
858	0.0001789	10	109	15	208
859	0.0001808	3	99	15	195
860	0.000163	65	124	19	183
861	0.0001736	30	115	18	200
862	0.0001687	20	109	19	198
863	0.0001782	27	114	19	201
864	0.000186	28	114	17	200
865	0.0001699	18	102	15	186
866	0.0001988	15	116	19	217
867	0.0001771	27	117	17	207
868	0.0001763	15	115	18	215
869	0.0001852	62	143	19	224
870	0.0001789	93	165	17	237
871	0.0001806	37	115	17	193
872	0.0001995	49	128	18	207
873	0.0001867	2	110	18	218
874	0.0001746	33	118	16	203
875	0.000187	10	104	18	198
876	0.0001828	38	119	19	200
877	0.0001776	47	117	19	187
878	0.0001683	69	124	19	179
879	0.0001866	21	120	18	219
880	0.0001659	39	125	18	211
881	0.0001803	52	116	18	180
882	0.0001854	3	90	17	177
883	0.0001904	50	120	19	190
884	0.0001996	26	115	17	204
885	0.0001831	38	113	16	188
886	0.0001654	61	127	19	193
887	0.0001744	44	118	16	192
888	0.0001827	41	109	19	177
889	0.0001994	7	100	18	193
890	0.0001964	3	96	17	189
891	0.0001823	81	141	19	201
892	0.0001759	4	94	18	184
893	0.0001863	34	116	16	198
894	0.0001933	5	104	18	203
895	0.000172	9	99	18	189
896	0.0002087	34	121	16	208
897	0.0001727	20	100	16	180
898	0.0002023	12	101	16	190
899	0.0001667	15	109	16	203
900	0.0001725	15	102	16	189
901	0.0001684	14	101	18	188
902	0.0001673	17	112	17	207
903	0.0001826	30	117	18	204
904	0.0001979	16	111	17	206
905	0.0001798	19	108	18	197
906	0.000185	13	98	19	183
907	0.0002154	0	96	16	192
908	0.000169	0	81	16	162
909	0.0001694	2	92	19	182
910	0.0001981	21	130	18	239
911	0.0001777	10	96	18	182
912	0.0001979	4	122	19	240
913	0.0001843	28	106	17	184
914	0.0001818	9	125	19	241
915	0.0001776	26	99	18	172
916	0.000172	1	101	18	201
917	0.0001864	15	111	17	207
918	0.0001855	15	103	19	191
919	0.0001759	34	127	17	220
920	0.0001892	31	117	19	203
921	0.0002103	42	126	16	210
922	0.0001925	11	104	16	197
923	0.0001727	35	100	14	165
924	0.0001694	35	121	18	207
925	0.0001846	2	92	17	182
926	0.0001729	59	122	19	185
927	0.0001657	41	118	18	195
928	0.0001797	45	120	17	195
929	0.0001751	3	80	13	157
930	0.0001884	43	129	17	215
931	0.0002034	5	103	18	201
932	0.0001664	60	122	18	184
933	0.0001637	20	96	17	172
934	0.0001899	19	107	16	195
935	0.0002036	44	131	15	218
936	0.0001809	6	91	18	176
937	0.0001673	27	118	18	209
938	0.0002038	34	109	18	184
939	0.000178	31	108	14	185
940	0.0001739	21	103	18	185
941	0.0001706	5	87	13	169
942	0.0001848	43	121	16	199
943	0.0001785	66	128	16	190
944	0.0001903	5	97	18	189
945	0.0001961	6	104	17	202
946	0.0001799	53	119	17	185
947	0.0001884	22	122	16	222
948	0.000164	37	108	15	179
949	0.0002022	19	99	19	179
950	0.0001851	11	98	17	185
951	0.0001898	22	110	19	198
952	0.0001932	27	116	17	205
953	0.0001811	50	121	19	192
954	0.0001728	3	93	17	183
955	0.0001796	55	139	18	223
956	0.0001707	10	93	16	176
957	0.0001722	64	137	18	210
958	0.0001922	33	112	19	191
959	0.0001797	29	119	18	209
960	0.0001768	12	121	19	230
961	0.0001834	50	120	19	190
962	0.0001744	19	105	15	191
963	0.0002195	5	87	16	169
964	0.0001746	5	100	17	195
965	0.0001816	39	102	16	165
966	0.0001658	57	129	17	201
967	0.000168	45	117	15	189
968	0.0001787	82	143	19	204
969	0.0001861	30	115	15	200
970	0.0001963	42	120	19	198
971	0.0001731	9	107	16	205
972	0.0001738	30	115	19	200
973	0.0001908	28	104	19	180
974	0.0002153	3	109	19	215
975	0.0002224	18	122	16	226
976	0.0001847	60	130	19	200
977	0.0001732	30	111	19	192
978	0.0001666	50	113	19	176
979	0.000185	3	108	19	213
980	0.0001732	22	115	19	208
981	0.0001712	23	96	19	169
982	0.0001719	37	124	15	211
983	0.0002362	26	115	17	204
984	0.0001899	64	118	18	172
985	0.0001813	44	133	19	222
986	0.0001865	31	118	14	205
987	0.000161	76	143	17	210
988	0.0002263	31	115	18	199
989	0.0002087	11	101	18	191
990	0.0001626	39	121	18	203
991	0.0002036	14	121	15	228
992	0.0001792	17	113	19	209
993	0.000177	58	134	18	210
994	0.0001738	9	102	18	195
995	0.0001688	38	111	19	184
996	0.000175	7	101	16	195
997	0.0002201	5	108	17	211
998	0.0001891	8	107	19	206
999	0.0001857	81	161	19	241
mean	0.000186192	28.869	113.246	17.374	197.623

## Sheet: GS_FemaleOpt
	time	SEq	Bal	Reg	Egal
0	0.0001818	37	115	17	193
1	0.0001746	32	114	17	196
2	0.0001689	21	94	13	167
3	0.0001663	7	109	19	211
4	0.0001687	1	103	19	205
5	0.0001682	1	102	16	203
6	0.0001783	20	119	19	218
7	0.0001703	8	110	16	212
8	0.0001902	32	117	19	202
9	0.000174	34	114	17	194
10	0.0002347	80	151	19	222
11	0.0001722	60	136	19	212
12	0.0001708	29	101	18	173
13	0.0002043	14	92	17	170
14	0.0001612	69	139	18	209
15	0.0001717	36	131	18	226
16	0.000154	80	127	18	174
17	0.0001565	25	99	19	173
18	0.0001759	9	105	17	201
19	0.0001774	22	102	17	182
20	0.0001594	47	114	19	181
21	0.0001736	2	109	18	216
22	0.0001755	2	102	17	202
23	0.0001801	40	124	18	208
24	0.0001613	69	143	19	217
25	0.0001689	17	117	17	217
26	0.0001709	34	117	18	200
27	0.0001812	4	104	17	204
28	0.0001922	40	117	18	194
29	0.0001718	46	129	16	212
30	0.0001675	7	104	19	201
31	0.0001879	23	117	17	211
32	0.0001631	34	116	18	198
33	0.0001583	24	97	15	170
34	0.0001637	54	138	18	222
35	0.0001862	35	94	17	153
36	0.000165	46	136	16	226
37	0.0001766	20	106	18	192
38	0.0001834	14	111	18	208
39	0.0001951	9	100	18	191
40	0.0001952	15	125	19	235
41	0.0001596	28	103	16	178
42	0.0002171	25	108	15	191
43	0.0001584	61	139	19	217
44	0.0001665	21	112	18	203
45	0.0001859	1	83	15	165
46	0.0001611	39	104	18	169
47	0.0001617	40	115	19	190
48	0.0001782	20	113	16	206
49	0.0001905	19	126	19	233
50	0.0001572	61	126	18	191
51	0.0001744	15	110	18	205
52	0.0001565	64	122	17	180
53	0.0001621	31	122	19	213
54	0.0001686	16	108	19	200
55	0.0001692	6	96	15	186
56	0.0001691	67	147	19	227
57	0.000222	3	115	16	227
58	0.0001671	14	97	16	180
59	0.0001608	30	120	18	210
60	0.0001974	49	120	17	191
61	0.0001694	40	131	19	222
62	0.0001921	19	96	19	173
63	0.0001868	14	99	15	184
64	0.0001903	1	112	18	223
65	0.0001692	7	96	19	185
66	0.000179	9	103	18	197
67	0.0001678	9	94	15	179
68	0.0001806	19	108	14	197
69	0.0001623	28	111	16	194
70	0.0001682	30	118	19	206
71	0.0001594	87	143	19	199
72	0.0001817	23	118	19	213
73	0.0001786	16	104	13	192
74	0.0001872	18	103	19	188
75	0.0001595	44	107	17	170
76	0.0001597	61	137	18	213
77	0.0001679	8	85	18	162
78	0.0001991	4	97	19	190
79	0.0001797	22	105	17	188
80	0.0001653	4	90	15	176
81	0.0001769	12	96	17	180
82	0.0001715	48	114	16	180
83	0.0001566	42	107	14	172
84	0.0001702	39	116	16	193
85	0.0001667	1	88	18	175
86	0.0001694	9	103	19	197
87	0.0002427	4	100	18	196
88	0.0001688	73	146	19	219
89	0.0001615	58	133	18	208
90	0.000171	1	103	19	205
91	0.0001728	32	116	18	200
92	0.000164	31	108	18	185
93	0.0001634	17	105	18	193
94	0.0001638	29	118	19	207
95	0.00017	9	88	14	167
96	0.000163	24	119	16	214
97	0.0001768	60	141	19	222
98	0.0001729	3	94	13	185
99	0.0001663	15	95	13	175
100	0.0001728	28	107	19	186
101	0.0001672	7	101	19	195
102	0.000171	1	94	19	187
103	0.0001675	36	123	19	210
104	0.0001623	20	99	16	178
105	0.0001683	38	110	17	182
106	0.0001789	27	109	19	191
107	0.0001591	49	114	17	179
108	0.0001723	34	111	19	188
109	0.0001758	14	109	18	204
110	0.0001815	16	104	15	192
111	0.0001675	34	109	19	184
112	0.0001641	21	101	18	181
113	0.0001829	59	131	18	203
114	0.0001782	16	111	17	206
115	0.000196	20	114	19	208
116	0.0001746	43	132	17	221
117	0.0001745	8	99	19	190
118	0.0001638	18	112	15	206
119	0.0001677	16	101	16	186
120	0.0001741	48	111	19	174
121	0.0001815	36	126	19	216
122	0.0001597	35	107	19	179
123	0.000167	34	131	18	228
124	0.0001724	14	113	18	212
125	0.0002023	62	128	15	194
126	0.0001878	38	123	19	208
127	0.0001719	30	117	15	204
128	0.0001822	22	112	17	202
129	0.0001751	3	116	16	229
130	0.0001633	13	112	15	211
131	0.0001767	56	125	16	194
132	0.0001801	12	95	17	178
133	0.0001718	31	124	19	217
134	0.0001695	37	118	14	199
135	0.0001648	41	115	15	189
136	0.00017	10	112	19	214
137	0.0001655	20	112	19	204
138	0.0001725	20	111	18	202
139	0.0001666	52	136	15	220
140	0.0001691	6	107	16	208
141	0.0001774	40	132	18	224
142	0.0001712	32	117	18	202
143	0.0001671	20	117	18	214
144	0.000158	43	100	17	157
145	0.0001811	6	109	19	212
146	0.0001686	5	94	17	183
147	0.0001628	41	128	17	215
148	0.0001558	57	118	17	179
149	0.0001729	25	108	18	191
150	0.0001871	31	129	17	227
151	0.000157	88	150	19	212
152	0.0001857	25	105	19	185
153	0.0001673	14	105	19	196
154	0.0001684	7	106	19	205
155	0.0002097	9	101	18	193
156	0.0001676	2	96	18	190
157	0.0001754	16	110	19	204
158	0.0001654	15	101	19	187
159	0.0001871	3	98	18	193
160	0.0001735	18	100	15	182
161	0.0001743	28	117	18	206
162	0.0001785	12	93	13	174
163	0.0001809	16	100	15	184
164	0.0001613	48	128	19	208
165	0.0001815	7	100	15	193
166	0.0001723	18	120	16	222
167	0.0001786	51	128	17	205
168	0.0001672	30	94	16	158
169	0.0001651	23	113	15	203
170	0.0001818	13	87	15	161
171	0.000167	50	121	18	192
172	0.000162	57	130	17	203
173	0.000175	57	135	16	213
174	0.000168	3	90	18	177
175	0.0001646	4	94	17	184
176	0.000176	25	109	17	193
177	0.0001943	13	109	18	205
178	0.0001671	5	87	15	169
179	0.0001865	24	117	16	210
180	0.0001751	24	121	17	218
181	0.0002093	47	118	17	189
182	0.0001833	36	116	18	196
183	0.0001753	9	99	19	189
184	0.0002069	59	132	19	205
185	0.0001795	21	91	19	161
186	0.0001627	37	113	19	189
187	0.000174	14	113	17	212
188	0.0002219	31	127	18	223
189	0.0001699	18	104	15	190
190	0.0001823	2	101	17	200
191	0.0001711	36	133	16	230
192	0.0001648	24	113	18	202
193	0.0002077	34	131	19	228
194	0.0001847	15	121	17	227
195	0.0001765	37	112	18	187
196	0.0001739	14	114	18	214
197	0.0001651	29	102	13	175
198	0.000168	8	96	18	184
199	0.0001927	32	121	19	210
200	0.0001595	44	124	19	204
201	0.0001725	4	95	18	186
202	0.0001703	25	105	16	185
203	0.000159	60	121	18	182
204	0.0001607	62	143	19	224
205	0.0001948	21	117	19	213
206	0.0001637	38	121	18	204
207	0.0001657	33	126	17	219
208	0.000209	17	116	17	215
209	0.0001626	43	115	19	187
210	0.0001644	1	101	16	201
211	0.0002084	50	122	19	194
212	0.0001731	3	100	15	197
213	0.0001719	41	106	13	171
214	0.0002064	14	111	19	208
215	0.0001688	69	132	17	195
216	0.0001758	12	110	18	208
217	0.0001731	24	113	19	202
218	0.00018	14	105	19	196
219	0.0001583	39	107	15	175
220	0.0001943	27	119	17	211
221	0.0001769	33	119	18	205
222	0.0001686	10	93	18	176
223	0.0001625	64	131	19	198
224	0.0001767	17	108	19	199
225	0.000158	41	110	14	179
226	0.0001813	27	123	19	219
227	0.0001727	4	113	16	222
228	0.0001731	37	113	16	189
229	0.0001742	3	93	15	183
230	0.000163	10	99	16	188
231	0.0001688	3	87	18	171
232	0.0001749	17	108	18	199
233	0.0001655	52	112	15	172
234	0.0001602	67	137	19	207
235	0.000189	9	99	19	189
236	0.0001753	40	126	19	212
237	0.0001702	14	106	19	198
238	0.0001591	51	118	18	185
239	0.0001727	6	96	19	186
240	0.0001702	0	94	18	188
241	0.0001688	9	105	19	201
242	0.0001595	11	85	17	159
243	0.0001624	25	109	16	193
244	0.0001661	15	107	18	199
245	0.0001775	36	108	17	180
246	0.0001587	46	100	17	154
247	0.0001981	4	111	18	218
248	0.0001646	54	127	19	200
249	0.0001765	56	126	15	196
250	0.0002287	6	104	16	202
251	0.0001599	67	138	17	209
252	0.0001588	72	136	19	200
253	0.0001782	46	112	18	178
254	0.0001724	32	122	17	212
255	0.0001689	14	110	17	206
256	0.0001702	18	115	19	212
257	0.0001799	11	98	14	185
258	0.0001678	19	104	18	189
259	0.0001655	16	94	17	172
260	0.0001761	16	107	16	198
261	0.0001655	32	119	19	206
262	0.0002112	24	115	19	206
263	0.0001953	14	117	18	220
264	0.0002032	15	105	14	195
265	0.0001735	42	138	19	234
266	0.0001952	9	117	17	225
267	0.0001733	24	98	18	172
268	0.0001651	57	125	18	193
269	0.0001823	35	107	16	179
270	0.0001611	35	114	18	193
271	0.0001692	12	99	14	186
272	0.00016	40	117	19	194
273	0.000179	15	110	19	205
274	0.0001836	58	137	17	216
275	0.000164	5	81	18	157
276	0.0001789	55	130	19	205
277	0.0001791	27	102	19	177
278	0.0001643	43	127	19	211
279	0.0001599	49	120	16	191
280	0.0001723	11	99	15	187
281	0.0002037	62	138	17	214
282	0.0001672	15	107	17	199
283	0.000177	43	111	12	179
284	0.0001721	22	100	16	178
285	0.0001739	27	107	16	187
286	0.000167	36	118	16	200
287	0.0001949	6	90	19	174
288	0.0001637	36	124	15	212
289	0.0001717	29	120	16	211
290	0.0001598	5	83	14	161
291	0.0001767	22	113	18	204
292	0.0001616	28	115	19	202
293	0.0001694	30	101	19	172
294	0.0001578	69	136	19	203
295	0.0001687	4	105	19	206
296	0.0001718	14	108	19	202
297	0.0001646	40	113	18	186
298	0.000168	14	96	19	178
299	0.0001892	10	101	18	192
300	0.0001682	13	114	17	215
301	0.0001799	40	117	18	194
302	0.0001637	46	121	19	196
303	0.0001711	2	94	17	186
304	0.000162	25	107	18	189
305	0.0001666	4	80	15	156
306	0.000176	0	96	19	192
307	0.000172	17	108	18	199
308	0.0002092	9	103	19	197
309	0.0001602	30	110	18	190
310	0.0001794	27	106	18	185
311	0.0002224	18	109	18	200
312	0.0001994	28	118	19	208
313	0.0001653	38	126	19	214
314	0.0001663	6	94	17	182
315	0.0001862	63	135	19	207
316	0.000174	25	103	14	181
317	0.0001638	34	114	18	194
318	0.0001705	2	90	19	178
319	0.0001716	1	103	17	205
320	0.0001978	23	103	15	183
321	0.0001627	32	108	18	184
322	0.0001594	73	138	18	203
323	0.00016	6	84	17	162
324	0.000184	6	97	16	188
325	0.0002038	24	104	13	184
326	0.0001617	73	138	18	203
327	0.0001715	20	119	17	218
328	0.0001595	54	127	19	200
329	0.0001602	59	122	18	185
330	0.0001721	13	104	19	195
331	0.0001707	75	147	19	219
332	0.0001619	27	104	15	181
333	0.0001653	14	106	18	198
334	0.0001586	64	126	18	188
335	0.0001688	5	109	18	213
336	0.0001739	42	124	19	206
337	0.0001785	31	131	17	231
338	0.000162	83	151	19	219
339	0.0001751	29	125	17	221
340	0.0001639	32	112	17	192
341	0.0001768	1	97	19	193
342	0.0001799	19	106	15	193
343	0.000173	3	104	19	205
344	0.0001642	50	129	17	208
345	0.0001698	66	122	19	178
346	0.0001647	23	104	17	185
347	0.0001716	9	102	18	195
348	0.0001616	47	124	18	201
349	0.0001612	78	148	18	218
350	0.0001718	31	125	19	219
351	0.0001757	66	123	18	180
352	0.0001667	3	101	18	199
353	0.0002446	50	136	19	222
354	0.0001601	29	101	18	173
355	0.0001703	40	123	18	206
356	0.000165	26	116	17	206
357	0.0001617	4	84	15	164
358	0.0001661	82	123	18	164
359	0.0001858	36	121	17	206
360	0.0002519	65	131	18	197
361	0.0001617	14	93	15	172
362	0.0001758	32	121	19	210
363	0.0001707	8	90	13	172
364	0.0001747	33	113	18	193
365	0.0002326	8	105	19	202
366	0.0001709	23	123	19	223
367	0.0001842	29	119	18	209
368	0.0001817	7	82	18	157
369	0.0001676	24	106	19	188
370	0.0001888	18	102	16	186
371	0.0001731	15	120	17	225
372	0.0001593	50	127	18	204
373	0.0001581	64	122	19	180
374	0.0001758	3	87	17	171
375	0.0001669	32	109	17	186
376	0.0001734	15	103	19	191
377	0.0001603	54	110	15	166
378	0.0001653	6	94	18	182
379	0.0001707	38	124	19	210
380	0.0001701	4	99	17	194
381	0.0001731	15	115	19	215
382	0.0001891	5	110	19	215
383	0.000162	54	129	18	204
384	0.0001725	35	110	15	185
385	0.0001714	6	111	19	216
386	0.0001715	25	107	18	189
387	0.000181	41	130	18	219
388	0.0001665	31	122	19	213
389	0.0001756	37	117	12	197
390	0.000175	11	108	15	205
391	0.0001899	6	129	19	252
392	0.0001761	8	118	19	228
393	0.0001638	61	144	18	227
394	0.0001926	20	102	18	184
395	0.0001783	18	107	19	196
396	0.0001608	61	135	17	209
397	0.0001629	24	101	17	178
398	0.0001591	44	120	18	196
399	0.0001544	83	150	17	217
400	0.0001635	29	115	19	201
401	0.0001711	1	105	18	209
402	0.0001645	21	93	19	165
403	0.0001673	8	109	17	210
404	0.0001722	33	120	19	207
405	0.0002129	30	108	18	186
406	0.0001696	33	131	19	229
407	0.0001686	0	95	15	190
408	0.0001639	24	112	19	200
409	0.0001787	16	105	18	194
410	0.000203	6	118	17	230
411	0.0001779	17	98	17	179
412	0.000173	4	97	17	190
413	0.0001715	28	123	19	218
414	0.0001605	29	95	16	161
415	0.0001703	33	111	19	189
416	0.0001616	107	168	19	229
417	0.0001957	57	134	19	211
418	0.0001554	49	119	19	189
419	0.0001732	12	97	17	182
420	0.0001671	28	121	18	214
421	0.0001657	23	102	19	181
422	0.0001774	1	92	16	183
423	0.0001595	55	115	18	175
424	0.0001728	19	113	19	207
425	0.0001591	76	144	19	212
426	0.0001743	21	99	19	177
427	0.0001594	12	90	18	168
428	0.0001594	71	136	19	201
429	0.0001588	58	129	19	200
430	0.0001714	17	117	18	217
431	0.0001598	63	138	19	213
432	0.0001618	66	130	16	194
433	0.0001677	4	105	17	206
434	0.0001598	65	127	18	189
435	0.000167	2	90	18	178
436	0.0001727	55	151	19	247
437	0.0001817	23	103	16	183
438	0.000181	47	126	15	205
439	0.0001755	13	108	17	203
440	0.0001646	18	109	16	200
441	0.0001642	30	115	19	200
442	0.0001754	33	119	18	205
443	0.000188	20	115	19	210
444	0.0001742	7	111	18	215
445	0.0001865	113	159	18	205
446	0.0001628	21	111	18	201
447	0.0001709	3	96	16	189
448	0.0001729	25	109	19	193
449	0.000169	10	102	19	194
450	0.000187	30	114	19	198
451	0.0001629	22	100	15	178
452	0.0001646	32	107	15	182
453	0.0001533	91	153	18	215
454	0.0002476	22	108	19	194
455	0.000161	17	102	19	187
456	0.0001916	26	119	19	212
457	0.000181	39	123	16	207
458	0.0001683	10	95	19	180
459	0.0001674	88	157	18	226
460	0.0001699	35	130	18	225
461	0.0001756	4	111	18	218
462	0.000179	5	108	15	211
463	0.0002125	2	108	16	214
464	0.0001696	14	110	16	206
465	0.0001698	8	115	19	222
466	0.000174	7	93	17	179
467	0.0001764	17	92	15	167
468	0.0001743	64	133	18	202
469	0.0002001	30	114	15	198
470	0.0001709	35	114	16	193
471	0.0001751	19	111	18	203
472	0.0001735	21	102	19	183
473	0.0001781	40	122	17	204
474	0.0001739	2	109	18	216
475	0.0001768	16	104	17	192
476	0.0001607	62	110	13	158
477	0.0001929	31	122	16	213
478	0.0001636	40	112	19	184
479	0.0001573	52	118	16	184
480	0.0001777	12	100	16	188
481	0.0001534	76	133	17	190
482	0.0001657	20	113	19	206
483	0.0001644	29	122	17	215
484	0.0001653	22	96	18	170
485	0.0001762	3	89	19	175
486	0.000182	8	116	19	224
487	0.0001735	35	126	16	217
488	0.0001718	2	95	19	188
489	0.0001633	78	147	16	216
490	0.000172	50	135	17	220
491	0.0001638	29	108	17	187
492	0.0001628	46	135	18	224
493	0.0001763	54	121	16	188
494	0.0001794	38	121	18	204
495	0.0001694	60	150	19	240
496	0.0001813	8	107	17	206
497	0.0001975	60	129	19	198
498	0.0001967	64	130	15	196
499	0.0001706	4	106	18	208
500	0.0001723	13	97	14	181
501	0.0001652	27	109	15	191
502	0.0002207	72	138	18	204
503	0.0001683	4	103	14	202
504	0.0001761	6	102	15	198
505	0.0001941	37	126	19	215
506	0.0001715	81	155	18	229
507	0.0001887	52	138	18	224
508	0.0001635	26	109	17	192
509	0.0002318	18	114	19	210
510	0.0001726	12	113	19	214
511	0.0001654	1	88	16	175
512	0.0001757	20	111	19	202
513	0.0001665	7	98	19	189
514	0.000167	23	111	15	199
515	0.0001636	25	109	13	193
516	0.0001759	10	109	18	208
517	0.0001677	14	96	18	178
518	0.000178	33	115	18	197
519	0.0001602	25	100	19	175
520	0.0001641	27	117	19	207
521	0.0001708	18	109	15	200
522	0.0001712	17	108	19	199
523	0.0001761	1	104	17	207
524	0.0001676	14	103	16	192
525	0.0002042	22	101	17	180
526	0.0001679	55	142	19	229
527	0.0002147	27	100	17	173
528	0.0001664	22	100	19	178
529	0.0001694	4	95	18	186
530	0.0002023	56	123	18	190
531	0.0001957	6	108	18	210
532	0.0001779	48	120	17	192
533	0.0001715	1	80	15	159
534	0.0001646	33	126	17	219
535	0.0001749	51	121	19	191
536	0.0001771	8	110	19	212
537	0.0002114	25	108	19	191
538	0.000193	42	123	15	204
539	0.0001679	16	107	16	198
540	0.0001771	34	127	17	220
541	0.0001756	36	129	17	222
542	0.0001877	49	120	19	191
543	0.0001716	22	112	18	202
544	0.000163	16	98	18	180
545	0.0001698	26	125	18	224
546	0.0001682	40	128	17	216
547	0.0001585	34	105	19	176
548	0.0001755	53	135	19	217
549	0.0001813	15	110	15	205
550	0.0001873	70	137	17	204
551	0.0001823	40	115	19	190
552	0.000191	14	110	19	206
553	0.000304	3	91	18	179
554	0.0001626	56	137	18	218
555	0.0001881	25	115	15	205
556	0.0001623	66	144	18	222
557	0.0002314	90	148	19	206
558	0.0001824	19	111	19	203
559	0.000196	39	115	17	191
560	0.0002047	61	140	16	219
561	0.0001658	14	97	18	180
562	0.0001608	52	128	19	204
563	0.0002049	1	99	16	197
564	0.0001646	36	118	19	200
565	0.0001639	59	131	18	203
566	0.0002142	20	108	18	196
567	0.0001566	145	184	18	223
568	0.00017	11	107	17	203
569	0.0001705	17	104	18	191
570	0.0001739	32	111	18	190
571	0.0001689	8	94	18	180
572	0.0001699	9	109	15	209
573	0.0001733	0	120	17	240
574	0.0001814	10	109	17	208
575	0.0001747	21	100	17	179
576	0.0001556	68	138	19	208
577	0.0001523	80	140	17	200
578	0.0001675	14	112	15	210
579	0.0001768	0	114	16	228
580	0.0001617	84	149	19	214
581	0.0001645	16	114	17	212
582	0.0002076	34	123	17	212
583	0.0001827	13	110	19	207
584	0.0001663	35	111	18	187
585	0.0001632	33	110	16	187
586	0.0001588	77	143	17	209
587	0.000189	4	108	18	212
588	0.0001735	19	108	19	197
589	0.0001666	29	109	16	189
590	0.0001552	68	125	19	182
591	0.0001633	28	107	14	186
592	0.0002129	37	125	17	213
593	0.0001776	12	118	18	224
594	0.0001612	25	108	18	191
595	0.0001814	52	129	18	206
596	0.00017	41	120	19	199
597	0.0001762	6	111	18	216
598	0.0002155	72	123	17	174
599	0.0001711	15	106	15	197
600	0.0001725	36	109	19	182
601	0.0001672	17	107	18	197
602	0.0001722	15	104	19	193
603	0.0001732	14	102	15	190
604	0.0001754	24	114	19	204
605	0.0001737	19	107	18	195
606	0.0001865	34	124	18	214
607	0.0001718	5	113	16	221
608	0.0001793	23	106	17	189
609	0.0001629	54	142	18	230
610	0.0001759	7	100	16	193
611	0.0001694	16	114	18	212
612	0.0001646	4	99	16	194
613	0.0001806	55	135	19	215
614	0.0001815	2	93	17	184
615	0.0001878	51	118	18	185
616	0.0001953	5	109	17	213
617	0.0001777	2	102	18	202
618	0.0001797	10	92	14	174
619	0.0001657	16	94	15	172
620	0.0001776	6	107	16	208
621	0.0001546	88	141	14	194
622	0.0001757	12	114	15	216
623	0.0001758	28	118	19	208
624	0.0001671	2	92	15	182
625	0.0001701	37	125	16	213
626	0.0001838	25	121	18	217
627	0.0002236	5	94	17	183
628	0.0001779	93	140	18	187
629	0.0001768	20	119	19	218
630	0.0001614	78	158	18	238
631	0.0001718	1	107	18	213
632	0.0003143	5	108	15	211
633	0.0001591	34	103	15	172
634	0.0002047	2	105	19	208
635	0.0001664	2	96	16	190
636	0.0001599	57	137	19	217
637	0.0001643	54	138	18	222
638	0.000186	20	92	17	164
639	0.0001678	20	113	19	206
640	0.0001619	44	118	18	192
641	0.0001853	6	104	16	202
642	0.0001718	32	102	19	172
643	0.0001692	64	137	19	210
644	0.0001647	32	120	19	208
645	0.0001706	45	128	19	211
646	0.0001976	2	103	17	204
647	0.0001881	32	114	15	196
648	0.0001681	19	91	17	163
649	0.0001711	16	110	19	204
650	0.0001623	78	139	19	200
651	0.0001732	1	108	19	215
652	0.0001709	12	120	18	228
653	0.0001859	30	107	17	184
654	0.0001692	27	103	19	179
655	0.0001576	79	142	18	205
656	0.0001762	25	100	13	175
657	0.0001819	48	111	17	174
658	0.0001673	18	114	17	210
659	0.0001644	50	123	16	196
660	0.0001778	19	102	16	185
661	0.0001712	20	117	18	214
662	0.0001741	6	100	15	194
663	0.0001779	11	109	17	207
664	0.0001653	69	145	19	221
665	0.0001759	1	100	18	199
666	0.0001762	6	110	17	214
667	0.0001751	20	100	17	180
668	0.0001746	31	117	18	203
669	0.0001797	21	110	17	199
670	0.0001768	2	90	16	178
671	0.0001745	4	115	19	226
672	0.0001816	20	103	16	186
673	0.0001722	17	113	19	209
674	0.0001701	22	104	15	186
675	0.0001678	17	106	18	195
676	0.0001676	26	116	17	206
677	0.0001669	7	95	19	183
678	0.0001684	17	116	19	215
679	0.0001794	11	114	19	217
680	0.0001727	15	108	16	201
681	0.0001644	45	135	19	225
682	0.0002011	41	130	17	219
683	0.0001655	23	123	17	223
684	0.0001719	5	95	16	185
685	0.0001803	31	107	15	183
686	0.0001783	13	102	18	191
687	0.0001703	19	116	17	213
688	0.0001575	19	90	18	161
689	0.0001742	57	117	16	177
690	0.0001669	4	84	17	164
691	0.0001647	37	126	19	215
692	0.0001639	5	94	14	183
693	0.0001742	7	104	17	201
694	0.0001552	95	163	19	231
695	0.0001736	16	108	17	200
696	0.0001695	47	115	19	183
697	0.0001635	64	138	17	212
698	0.0001647	37	121	19	205
699	0.0001786	23	93	18	163
700	0.0001772	21	105	17	189
701	0.0001762	0	107	17	214
702	0.0001738	13	103	19	193
703	0.0001569	24	107	19	190
704	0.0001591	34	107	19	180
705	0.0001742	46	124	17	202
706	0.0001819	86	156	17	226
707	0.00018	5	100	17	195
708	0.00018	21	107	16	193
709	0.0001661	12	106	19	200
710	0.0001679	22	96	15	170
711	0.0001714	6	97	17	188
712	0.0001656	9	96	15	183
713	0.0001679	29	115	16	201
714	0.0001877	41	127	17	213
715	0.0001683	29	113	17	197
716	0.0001756	1	103	15	205
717	0.0001771	18	100	18	182
718	0.0001715	1	94	15	187
719	0.000173	2	96	18	190
720	0.0001868	22	120	14	218
721	0.0001674	27	117	19	207
722	0.0001663	19	104	17	189
723	0.0001685	27	120	18	213
724	0.0001741	9	91	17	173
725	0.0001661	44	127	17	210
726	0.0001813	44	123	19	202
727	0.0001624	35	102	17	169
728	0.0001656	37	130	19	223
729	0.000155	59	118	16	177
730	0.00016	50	109	15	168
731	0.0001666	63	142	19	221
732	0.0001683	13	121	19	229
733	0.0001795	14	99	19	184
734	0.0001653	38	111	19	184
735	0.0001681	27	103	19	179
736	0.0001957	51	131	17	211
737	0.0001897	22	104	19	186
738	0.0001758	37	119	17	201
739	0.0001743	4	97	18	190
740	0.0001767	12	108	18	204
741	0.0001753	11	116	16	221
742	0.0002205	41	129	19	217
743	0.0001678	15	111	15	207
744	0.0001639	29	116	16	203
745	0.0001727	58	136	19	214
746	0.0001734	11	94	16	177
747	0.0001909	2	103	16	204
748	0.0002043	4	96	16	188
749	0.0001905	45	125	18	205
750	0.0001687	67	139	17	211
751	0.0001655	4	94	17	184
752	0.0001596	46	120	19	194
753	0.0001594	67	132	19	197
754	0.0001858	62	129	18	196
755	0.0001894	15	104	15	193
756	0.0001684	56	134	19	212
757	0.0001766	34	130	18	226
758	0.0002027	9	95	19	181
759	0.0001764	37	121	14	205
760	0.0001582	51	118	17	185
761	0.0001744	9	101	19	193
762	0.0001569	39	110	19	181
763	0.0001754	12	106	16	200
764	0.0001866	11	101	16	191
765	0.0001567	67	134	18	201
766	0.0001679	15	112	18	209
767	0.0001598	63	136	19	209
768	0.0001766	7	111	18	215
769	0.0001589	35	116	18	197
770	0.0001656	29	109	17	189
771	0.0001597	65	131	19	197
772	0.0001598	41	117	16	193
773	0.0001699	19	110	19	201
774	0.0001626	80	161	19	242
775	0.0001727	26	121	17	216
776	0.0001544	89	155	18	221
777	0.0001748	39	124	17	209
778	0.000179	29	101	17	173
779	0.000184	27	113	14	199
780	0.0001608	29	104	18	179
781	0.0001806	0	80	15	160
782	0.0001743	28	119	16	210
783	0.0001698	4	105	18	206
784	0.0001772	16	110	18	204
785	0.0001696	16	102	19	188
786	0.000176	18	97	14	176
787	0.0001672	13	102	14	191
788	0.0001676	38	112	18	186
789	0.0001724	19	106	17	193
790	0.0001732	39	127	19	215
791	0.0001775	18	108	16	198
792	0.0001664	48	137	18	226
793	0.0001695	0	99	19	198
794	0.000166	54	125	19	196
795	0.0001836	12	106	17	200
796	0.0001693	53	128	19	203
797	0.000163	21	105	19	189
798	0.0001581	103	157	19	211
799	0.0002047	3	84	16	165
800	0.0001899	1	96	16	191
801	0.0001651	42	126	19	210
802	0.0001626	1	88	16	175
803	0.0001795	27	109	18	191
804	0.0001762	13	106	16	199
805	0.0001685	19	101	14	183
806	0.000167	16	113	17	210
807	0.0001696	16	120	19	224
808	0.0001991	7	100	16	193
809	0.0001891	7	98	19	189
810	0.0002274	24	132	17	240
811	0.000181	29	117	18	205
812	0.000173	10	108	19	206
813	0.0001802	12	108	16	204
814	0.0001762	18	119	19	220
815	0.0001653	49	137	16	225
816	0.0001703	30	116	17	202
817	0.0001689	6	93	18	180
818	0.0002084	25	121	16	217
819	0.000169	45	112	14	179
820	0.0001632	28	108	15	188
821	0.0001789	37	126	16	215
822	0.0001637	14	109	19	204
823	0.0001831	28	113	17	198
824	0.0001586	71	143	19	215
825	0.0002092	27	109	19	191
826	0.000164	5	78	16	151
827	0.0001554	76	136	18	196
828	0.000178	40	125	17	210
829	0.0001555	68	134	18	200
830	0.0001896	58	148	18	238
831	0.0001715	29	124	19	219
832	0.0001686	3	101	19	199
833	0.0001739	20	109	18	198
834	0.0001899	24	109	19	194
835	0.0002018	33	131	19	229
836	0.0001651	17	105	14	193
837	0.0001811	36	113	17	190
838	0.0001858	12	105	18	198
839	0.0001572	57	127	19	197
840	0.0001682	7	110	17	213
841	0.0001735	26	109	18	192
842	0.0001607	41	121	18	201
843	0.0001718	25	108	19	191
844	0.0002	10	86	13	162
845	0.0001578	70	138	18	206
846	0.0001688	27	117	15	207
847	0.0001802	36	119	19	202
848	0.0001728	16	107	19	198
849	0.0001706	40	136	18	232
850	0.0001763	1	106	19	211
851	0.0001667	19	101	15	183
852	0.000169	41	123	18	205
853	0.0001602	74	142	19	210
854	0.0001781	36	119	19	202
855	0.0001552	108	161	19	214
856	0.000167	13	94	15	175
857	0.0001759	41	118	19	195
858	0.000171	1	105	15	209
859	0.0001705	48	123	17	198
860	0.0001729	76	126	19	176
861	0.0001582	30	115	18	200
862	0.0001716	10	104	19	198
863	0.000172	4	99	19	194
864	0.0001698	17	106	17	195
865	0.0001681	5	94	15	183
866	0.0001743	15	116	19	217
867	0.0001832	27	117	17	207
868	0.000186	57	145	19	233
869	0.0001593	48	130	19	212
870	0.0001855	93	165	17	237
871	0.0001992	37	115	17	193
872	0.0001668	2	108	18	214
873	0.0001721	2	110	18	218
874	0.0001725	69	126	16	183
875	0.0001632	34	114	18	194
876	0.0001673	38	119	19	200
877	0.0001729	27	108	19	189
878	0.0001738	17	94	15	171
879	0.0001754	25	123	18	221
880	0.0001711	17	113	18	209
881	0.0001645	8	101	19	194
882	0.0001648	3	90	17	177
883	0.0001645	48	116	17	184
884	0.000188	7	98	17	189
885	0.0001718	38	113	16	188
886	0.0001806	61	127	19	193
887	0.000183	8	99	16	190
888	0.0001578	41	109	19	177
889	0.0001637	33	117	19	201
890	0.0001572	54	124	17	194
891	0.0001718	4	104	18	204
892	0.0001668	26	106	19	186
893	0.0001633	34	116	16	198
894	0.0001615	29	119	15	209
895	0.0001569	46	115	16	184
896	0.0001649	12	107	16	202
897	0.0001658	20	100	16	180
898	0.0001559	87	149	18	211
899	0.0001683	15	109	16	203
900	0.0001896	6	95	16	184
901	0.0001746	3	98	17	193
902	0.0001582	56	125	18	194
903	0.0001726	30	117	18	204
904	0.0001647	16	111	17	206
905	0.0002208	67	139	16	211
906	0.0001616	41	114	19	187
907	0.0001606	50	118	19	186
908	0.0001628	0	81	16	162
909	0.0001691	34	114	19	194
910	0.0001619	67	145	18	223
911	0.0001688	10	96	18	182
912	0.0001736	4	122	19	240
913	0.0001596	47	112	19	177
914	0.0001702	25	135	19	245
915	0.0001578	26	99	18	172
916	0.0001612	36	110	17	184
917	0.0001697	12	110	18	208
918	0.0001768	15	103	19	191
919	0.0001626	59	134	19	209
920	0.000166	53	143	18	233
921	0.0001679	27	125	18	223
922	0.0001711	11	104	16	197
923	0.0001693	18	93	14	168
924	0.000163	35	119	19	203
925	0.0001604	72	134	19	196
926	0.0002555	80	144	19	208
927	0.0001671	32	121	18	210
928	0.0001632	15	105	16	195
929	0.0001649	3	80	13	157
930	0.000216	43	129	17	215
931	0.0002066	5	103	18	201
932	0.0001806	3	95	15	187
933	0.0001854	27	100	16	173
934	0.0001755	19	107	16	195
935	0.0001787	2	103	15	204
936	0.0001684	6	91	18	176
937	0.0001742	18	109	18	200
938	0.0001584	34	109	18	184
939	0.0001688	44	123	18	202
940	0.0001959	13	104	16	195
941	0.0001862	5	87	13	169
942	0.0002051	26	115	19	204
943	0.0001717	6	104	17	202
944	0.000163	51	125	18	199
945	0.0001626	57	135	17	213
946	0.0001568	86	141	19	196
947	0.0001785	5	115	17	225
948	0.000166	3	87	12	171
949	0.000161	19	99	19	179
950	0.0001638	14	102	19	190
951	0.0001801	44	125	19	206
952	0.0001712	20	114	17	208
953	0.0001675	20	106	18	192
954	0.0001608	23	105	19	187
955	0.0001731	10	116	19	222
956	0.0001732	24	100	16	176
957	0.0001725	4	101	18	198
958	0.0001577	52	113	19	174
959	0.000172	29	119	18	209
960	0.0001619	58	138	17	218
961	0.0001734	8	98	18	188
962	0.0001709	25	118	19	211
963	0.0001607	27	99	15	171
964	0.0001778	5	100	17	195
965	0.0001576	39	102	16	165
966	0.0001707	25	106	16	187
967	0.0001724	35	111	15	187
968	0.0001791	71	135	16	199
969	0.0001665	32	105	15	178
970	0.0001685	3	107	18	211
971	0.0001742	9	107	16	205
972	0.0001764	10	110	19	210
973	0.0001714	28	104	19	180
974	0.0001678	3	109	19	215
975	0.0001661	62	145	19	228
976	0.0001739	32	119	18	206
977	0.0002003	30	111	19	192
978	0.0001716	16	97	19	178
979	0.00016	37	116	19	195
980	0.0001578	40	118	18	196
981	0.0001567	25	95	19	165
982	0.0001989	29	120	16	211
983	0.0001664	26	115	17	204
984	0.0001742	37	102	18	167
985	0.0001617	51	136	19	221
986	0.0001774	32	122	18	212
987	0.0001661	73	153	19	233
988	0.0001828	31	115	18	199
989	0.0001651	11	101	18	191
990	0.0002093	28	118	17	208
991	0.0001722	28	130	19	232
992	0.0001888	17	113	19	209
993	0.0001768	10	103	18	196
994	0.0001571	30	105	18	180
995	0.0001856	17	107	19	197
996	0.0001866	7	101	16	195
997	0.000169	26	117	19	208
998	0.0001688	8	106	19	204
999	0.0001767	31	140	18	249
mean	0.000174297	28.805	113.493	17.441	198.181

## Sheet: GS_Opt
	time	SEq	Bal	Reg	Egal
0	0.0003548	37	115	17	181
1	0.0003542	18	109	16	196
2	0.0003469	21	94	13	167
3	0.0003278	7	109	17	202
4	0.000341	1	103	19	205
5	0.00034	1	102	16	203
6	0.0003814	20	119	19	218
7	0.0005653	8	110	16	212
8	0.0003576	32	117	19	202
9	0.0003401	34	114	17	194
10	0.0004209	80	151	19	222
11	0.00037	39	129	16	212
12	0.0003619	29	101	18	173
13	0.0003755	14	92	17	170
14	0.000359	60	135	18	209
15	0.0003558	36	131	18	226
16	0.0003401	75	124	18	173
17	0.0003252	4	84	19	164
18	0.0003548	9	105	17	201
19	0.0003453	22	102	17	182
20	0.0003327	0	99	19	181
21	0.0003613	2	109	18	216
22	0.000356	2	102	17	202
23	0.0003442	40	124	18	204
24	0.0003305	54	128	19	202
25	0.0003484	11	113	17	215
26	0.0003484	3	90	18	177
27	0.0003415	4	104	16	201
28	0.0004066	40	117	17	194
29	0.0004325	36	129	16	212
30	0.0003901	7	104	19	192
31	0.0003763	23	117	17	211
32	0.0003558	12	107	18	198
33	0.0003268	22	92	14	162
34	0.0003455	22	113	17	204
35	0.0004044	35	94	17	153
36	0.0003876	13	115	16	217
37	0.0003498	20	106	17	174
38	0.0003958	2	102	18	202
39	0.0003769	9	100	18	191
40	0.0003658	15	125	17	230
41	0.0003306	10	91	15	172
42	0.0003912	0	98	15	191
43	0.0003679	61	139	19	217
44	0.0005633	1	108	18	203
45	0.0003551	1	83	15	165
46	0.0003427	24	91	13	158
47	0.0003411	29	115	19	190
48	0.0003525	12	108	16	204
49	0.0004178	2	121	17	233
50	0.0003377	43	116	17	189
51	0.0003671	15	110	18	205
52	0.0003289	6	89	13	172
53	0.0003539	11	109	19	207
54	0.0003454	16	108	19	182
55	0.0003291	6	96	15	186
56	0.0003361	40	132	19	224
57	0.0003897	3	115	16	227
58	0.0004009	14	97	16	180
59	0.0003419	1	109	18	210
60	0.0003788	49	120	17	191
61	0.0003442	8	116	17	222
62	0.0003605	16	96	19	173
63	0.0003708	10	99	15	184
64	0.000376	1	112	18	223
65	0.00034	7	96	19	183
66	0.0003553	5	103	18	197
67	0.0003358	9	94	15	178
68	0.000355	19	108	14	193
69	0.0003383	28	111	16	194
70	0.0003468	7	103	19	199
71	0.0003424	58	132	17	199
72	0.000364	12	108	18	204
73	0.0003604	16	104	13	192
74	0.0003719	18	103	16	183
75	0.000355	44	107	17	170
76	0.0003743	37	122	18	207
77	0.00034	8	85	18	162
78	0.000379	4	97	19	190
79	0.0003625	22	105	17	188
80	0.0003272	4	90	15	172
81	0.0003605	12	96	17	179
82	0.0003483	29	109	16	180
83	0.0003379	42	107	14	172
84	0.0003764	3	100	15	193
85	0.0003574	1	88	18	175
86	0.000332	9	103	17	195
87	0.0004091	4	100	18	187
88	0.0003769	30	122	18	214
89	0.0004863	55	130	17	205
90	0.0003446	1	103	18	187
91	0.0003987	16	107	15	198
92	0.0003571	31	108	18	185
93	0.0003707	17	105	17	193
94	0.0003486	29	117	17	199
95	0.0003348	9	88	14	167
96	0.0003834	21	110	16	199
97	0.0003476	55	136	16	217
98	0.0003446	3	94	13	185
99	0.0003475	15	95	13	175
100	0.0004417	28	107	19	186
101	0.0003524	7	101	19	195
102	0.0003678	1	94	19	187
103	0.0003249	36	123	19	210
104	0.0003324	20	99	16	178
105	0.0003332	38	110	17	181
106	0.0003487	27	109	19	191
107	0.0003669	23	104	17	179
108	0.0003583	34	111	19	188
109	0.0003432	14	109	18	202
110	0.0003582	16	104	15	192
111	0.0003414	15	105	19	184
112	0.0003616	21	101	18	181
113	0.0003626	59	131	18	203
114	0.0003474	16	111	17	206
115	0.000393	3	103	19	203
116	0.0003534	43	132	17	221
117	0.0003444	8	99	19	186
118	0.000347	15	112	15	206
119	0.0003585	16	101	16	186
120	0.0003568	15	96	18	174
121	0.0003607	2	112	17	216
122	0.0003452	31	96	18	161
123	0.0003338	34	122	17	200
124	0.0003372	14	113	18	201
125	0.000379	62	128	15	194
126	0.0003555	11	115	19	208
127	0.0003515	30	117	15	204
128	0.0003557	22	112	17	202
129	0.000376	3	116	16	229
130	0.0003428	13	112	15	211
131	0.0003763	56	125	16	194
132	0.0003594	12	95	17	171
133	0.0003512	31	124	17	217
134	0.0003361	37	118	14	199
135	0.0003487	41	115	15	189
136	0.0003621	10	112	19	214
137	0.0003456	1	106	18	204
138	0.0003475	20	111	18	202
139	0.0003466	19	113	15	207
140	0.0003743	6	107	16	205
141	0.0003657	40	132	18	224
142	0.0003503	32	117	18	202
143	0.000349	1	105	18	209
144	0.0003747	2	77	17	152
145	0.0003486	6	109	19	212
146	0.0003421	5	94	17	183
147	0.0003444	41	127	17	201
148	0.0003286	15	107	17	179
149	0.0003311	25	108	18	174
150	0.0003604	31	129	17	227
151	0.0003314	30	119	19	208
152	0.0003838	25	105	19	185
153	0.0003385	14	104	17	176
154	0.0003566	7	106	16	205
155	0.0003754	9	101	18	193
156	0.0003468	2	96	18	190
157	0.0003678	5	101	18	197
158	0.0003458	15	99	17	180
159	0.0003605	3	98	16	193
160	0.0003843	18	100	15	182
161	0.0003513	0	95	18	190
162	0.0003522	12	93	13	174
163	0.0003543	16	100	15	184
164	0.0003556	8	111	19	208
165	0.0003586	7	100	15	193
166	0.0003511	18	120	16	222
167	0.0003459	38	128	16	205
168	0.00033	5	78	16	151
169	0.0003333	23	113	15	197
170	0.0003607	13	87	15	161
171	0.0003503	8	99	18	190
172	0.000353	39	126	17	203
173	0.000358	12	105	15	198
174	0.0003339	3	90	18	177
175	0.0003744	4	94	17	184
176	0.0003765	25	109	17	193
177	0.0003847	13	109	18	196
178	0.0003459	5	87	15	169
179	0.0003503	24	117	16	188
180	0.0003497	24	121	17	218
181	0.0003792	40	118	16	189
182	0.0003629	36	116	18	196
183	0.0003485	9	99	19	189
184	0.0003929	5	108	18	205
185	0.0003643	11	89	17	161
186	0.0003496	23	106	17	189
187	0.0003642	14	113	17	212
188	0.0004304	22	122	18	222
189	0.0003406	18	104	15	190
190	0.0003618	2	101	17	200
191	0.0003537	36	133	16	230
192	0.000341	1	100	15	199
193	0.0003731	34	127	19	213
194	0.0003792	15	121	17	227
195	0.0003335	37	112	18	187
196	0.0003626	14	114	18	214
197	0.0003586	29	102	13	175
198	0.0003541	8	96	18	184
199	0.0004018	32	121	19	210
200	0.0003832	31	122	19	204
201	0.0003424	4	95	18	181
202	0.0003585	25	105	16	185
203	0.0003704	42	109	17	176
204	0.0003358	57	130	18	203
205	0.0003875	21	117	19	213
206	0.0003428	4	100	16	196
207	0.0003506	10	116	17	219
208	0.0003845	4	108	16	212
209	0.000342	31	106	19	181
210	0.0003485	1	101	16	201
211	0.0004106	1	99	17	194
212	0.0003668	3	100	15	197
213	0.0003461	5	84	13	163
214	0.0003936	14	111	19	208
215	0.0003859	10	103	17	195
216	0.0003651	12	110	18	208
217	0.0003489	24	113	19	202
218	0.0004091	14	105	18	192
219	0.0003293	28	99	15	170
220	0.0003783	7	103	17	199
221	0.0004558	33	119	18	205
222	0.000334	10	93	18	174
223	0.0003407	10	95	17	180
224	0.0003462	17	108	19	199
225	0.0003486	17	105	14	179
226	0.0003423	27	123	18	219
227	0.0003472	4	113	16	222
228	0.0003424	37	113	16	189
229	0.000346	3	93	15	183
230	0.0003445	10	99	16	185
231	0.00034	3	87	16	171
232	0.0003533	17	108	18	199
233	0.0003383	18	106	15	172
234	0.0003406	40	119	17	198
235	0.0003709	9	99	19	189
236	0.0003493	40	126	19	212
237	0.0003581	14	106	18	198
238	0.0003692	10	94	17	178
239	0.0003455	6	96	17	186
240	0.0003391	0	94	17	188
241	0.0003415	9	105	19	201
242	0.0003317	11	85	17	159
243	0.0003512	25	109	16	193
244	0.000347	15	107	18	199
245	0.0003559	36	108	17	180
246	0.0003204	41	100	17	154
247	0.0003995	4	111	18	218
248	0.0003427	34	107	19	180
249	0.0003636	56	126	15	196
250	0.0004076	6	104	16	201
251	0.0003557	67	138	17	209
252	0.0003366	23	108	17	193
253	0.0003597	37	106	18	175
254	0.0003578	32	118	14	200
255	0.0003481	14	110	17	206
256	0.000351	0	109	18	212
257	0.0003541	11	98	14	185
258	0.0003583	19	104	18	189
259	0.0003456	16	94	17	172
260	0.0003473	16	107	16	198
261	0.0003541	23	119	19	206
262	0.0003843	24	115	19	206
263	0.0003723	14	117	18	220
264	0.0003819	15	105	14	195
265	0.000396	24	125	19	226
266	0.0003612	9	117	17	210
267	0.00038	24	98	18	172
268	0.0003471	1	113	18	193
269	0.0003415	35	107	16	179
270	0.0003278	16	101	18	186
271	0.0003453	12	99	14	185
272	0.0003856	40	117	17	184
273	0.0003608	15	110	19	205
274	0.0003601	17	114	17	211
275	0.0003378	5	81	17	154
276	0.0003687	36	116	17	196
277	0.000351	27	102	19	177
278	0.0003512	13	110	19	207
279	0.0003489	28	108	16	188
280	0.0003465	11	99	15	187
281	0.000397	41	119	17	197
282	0.0003616	15	107	17	199
283	0.00036	43	111	12	179
284	0.0003615	22	100	16	178
285	0.0003799	27	107	16	187
286	0.0003399	36	118	16	200
287	0.0004036	6	90	19	174
288	0.0003424	36	124	15	212
289	0.0003461	29	118	16	197
290	0.0003298	4	83	14	161
291	0.0003543	22	113	18	204
292	0.0003591	3	96	19	189
293	0.0003723	9	90	17	171
294	0.0003476	69	136	19	203
295	0.0003491	4	105	17	206
296	0.000413	14	108	19	202
297	0.0003518	14	107	17	186
298	0.0003913	14	96	19	178
299	0.0003548	10	101	17	185
300	0.0003503	13	114	17	215
301	0.0003472	40	117	16	191
302	0.0003908	16	107	16	196
303	0.0003473	2	94	17	186
304	0.000323	25	107	18	189
305	0.0003398	4	80	15	156
306	0.0003451	0	96	18	192
307	0.0003669	17	108	18	199
308	0.0003895	9	103	19	197
309	0.0003585	30	110	18	190
310	0.0003615	3	83	18	163
311	0.0004089	18	109	18	200
312	0.0003757	28	114	19	189
313	0.0003542	14	119	18	214
314	0.0003654	2	90	17	178
315	0.0003606	3	104	18	205
316	0.0003512	25	103	14	177
317	0.0003465	4	95	18	186
318	0.0003502	2	90	19	176
319	0.0003429	1	103	17	193
320	0.0003654	12	103	15	183
321	0.0003601	32	108	18	184
322	0.0003286	56	138	18	203
323	0.0003332	6	84	17	162
324	0.0003725	6	97	16	188
325	0.0003801	24	104	13	176
326	0.0003646	40	115	18	190
327	0.0003528	20	119	17	199
328	0.0003591	39	120	19	200
329	0.0003511	48	116	18	184
330	0.0003434	4	97	19	190
331	0.0003442	1	90	15	179
332	0.0003631	16	101	15	181
333	0.0003341	14	106	18	190
334	0.0003472	64	126	18	188
335	0.000333	5	109	18	200
336	0.0003551	42	124	19	206
337	0.0003778	31	131	17	231
338	0.0003498	15	103	17	191
339	0.0003449	29	125	17	221
340	0.0003611	8	109	17	192
341	0.0003398	1	97	18	179
342	0.00037	12	105	15	193
343	0.0004035	3	104	19	205
344	0.0003535	14	100	17	186
345	0.0003516	66	122	19	178
346	0.0003267	15	89	15	163
347	0.0003363	9	102	18	195
348	0.0003242	47	124	18	192
349	0.0003502	21	109	18	197
350	0.0003619	31	125	16	210
351	0.0003373	66	123	18	180
352	0.000363	3	101	18	199
353	0.0004672	50	136	19	222
354	0.0003322	29	101	18	173
355	0.0003478	40	123	18	206
356	0.0003398	4	104	17	204
357	0.0004063	4	84	15	159
358	0.0003629	9	92	18	164
359	0.0003806	36	121	17	206
360	0.0004238	65	131	18	197
361	0.0003842	1	85	15	169
362	0.0003586	32	121	19	210
363	0.0003607	8	90	13	172
364	0.0003448	33	113	18	190
365	0.0004092	8	105	19	202
366	0.0003559	23	123	19	223
367	0.0003797	10	109	14	208
368	0.0003532	7	82	18	157
369	0.0003802	14	95	19	176
370	0.0003631	18	102	15	180
371	0.0003597	6	110	17	214
372	0.0003387	36	113	18	190
373	0.0003361	34	105	19	176
374	0.0003711	3	87	17	171
375	0.0003505	16	97	17	178
376	0.0003525	15	103	19	191
377	0.0003655	17	90	15	163
378	0.0003429	6	94	16	182
379	0.0003618	11	113	17	210
380	0.0003445	4	99	17	189
381	0.0003475	15	115	19	215
382	0.0003848	5	110	19	215
383	0.000357	22	111	18	200
384	0.0003459	35	110	15	185
385	0.000356	6	111	17	212
386	0.0003511	16	105	18	189
387	0.0004448	41	130	18	219
388	0.0003441	31	118	19	201
389	0.0003446	37	117	12	197
390	0.00034	11	108	15	203
391	0.0003991	6	129	19	252
392	0.0003628	5	115	19	225
393	0.0003516	1	104	18	207
394	0.0003825	20	102	18	184
395	0.0003546	18	107	18	187
396	0.000347	61	135	17	209
397	0.0003817	4	90	17	176
398	0.0003232	44	120	18	183
399	0.0003462	83	150	17	217
400	0.000385	14	101	18	188
401	0.0003456	1	105	18	209
402	0.0003883	21	93	19	165
403	0.0003363	8	109	17	207
404	0.0003501	33	120	19	207
405	0.0003937	22	101	18	180
406	0.0003809	13	124	18	229
407	0.0003555	0	95	15	190
408	0.0003619	2	100	16	198
409	0.0003558	16	105	18	194
410	0.000378	6	118	17	221
411	0.0003492	17	98	17	179
412	0.0003547	4	97	17	190
413	0.0003711	28	123	19	218
414	0.0003388	29	95	16	161
415	0.0003682	6	105	17	189
416	0.0003384	23	108	16	193
417	0.0004553	57	134	19	211
418	0.0003178	49	119	19	185
419	0.0003509	12	97	17	182
420	0.0003737	28	121	18	214
421	0.0003444	2	98	17	181
422	0.0003573	1	92	16	177
423	0.0003781	10	96	13	175
424	0.0003469	19	113	19	207
425	0.0003604	76	144	19	211
426	0.0003358	21	99	19	177
427	0.0003551	4	84	15	164
428	0.0003409	12	111	17	201
429	0.0003404	26	116	19	200
430	0.0003498	17	117	18	217
431	0.0003456	14	115	18	213
432	0.0003496	28	110	15	192
433	0.0003491	4	105	17	206
434	0.0003318	46	116	18	186
435	0.0003533	2	90	18	178
436	0.0003617	22	130	19	238
437	0.0003608	1	91	16	181
438	0.0003681	47	126	15	205
439	0.0003508	13	108	17	203
440	0.0003324	18	109	16	200
441	0.0003441	30	112	17	192
442	0.0003429	33	119	18	205
443	0.0003734	10	110	19	210
444	0.0003772	7	111	18	215
445	0.0003871	44	127	18	205
446	0.0003666	21	111	18	201
447	0.0003448	3	96	16	189
448	0.0003468	25	109	17	193
449	0.000331	10	102	19	194
450	0.0003821	8	104	19	198
451	0.0003389	22	100	15	178
452	0.0003416	10	94	15	178
453	0.0003819	21	118	18	215
454	0.0004262	22	108	19	194
455	0.0003345	17	102	18	187
456	0.0003702	26	119	19	212
457	0.0003439	39	123	16	201
458	0.0003505	10	95	19	180
459	0.0003626	59	145	18	226
460	0.0003518	19	119	18	219
461	0.0003533	4	111	18	217
462	0.0003545	5	108	15	211
463	0.0004036	2	108	16	203
464	0.00035	14	110	16	206
465	0.0003586	8	115	19	222
466	0.0003451	7	93	17	179
467	0.0003557	17	92	15	167
468	0.0003466	42	123	18	202
469	0.0004173	30	114	15	198
470	0.0003561	35	114	16	193
471	0.0003507	19	111	18	203
472	0.0003834	21	102	19	183
473	0.000339	40	122	17	204
474	0.0003765	2	109	18	216
475	0.000347	16	104	17	192
476	0.0005052	2	77	12	152
477	0.0003593	31	122	16	213
478	0.0003641	2	91	14	180
479	0.0003256	12	103	14	184
480	0.0003383	12	100	16	188
481	0.0003649	49	120	17	190
482	0.0003451	20	113	19	194
483	0.0003406	29	122	17	215
484	0.0003356	22	96	18	170
485	0.0003546	3	89	19	175
486	0.0003859	8	116	18	224
487	0.0003642	35	126	16	217
488	0.0004004	2	95	19	188
489	0.000351	36	129	16	216
490	0.0003745	2	107	17	212
491	0.0003358	29	108	17	187
492	0.0003402	41	127	18	213
493	0.0003599	54	121	16	188
494	0.0003574	25	107	16	189
495	0.000347	44	131	19	218
496	0.0003555	8	107	17	199
497	0.0003849	10	98	18	186
498	0.0003656	25	100	14	175
499	0.0003411	4	106	18	208
500	0.00035	13	97	14	181
501	0.0003403	27	109	15	191
502	0.0004094	7	104	18	201
503	0.0003307	4	103	14	202
504	0.0003507	6	102	15	198
505	0.0004335	37	126	19	215
506	0.0003988	19	119	15	219
507	0.0003747	35	138	18	224
508	0.0003818	9	89	17	169
509	0.0003987	8	106	17	204
510	0.0003631	12	113	19	214
511	0.0003402	1	88	16	175
512	0.0004204	20	111	19	202
513	0.0003359	7	98	17	189
514	0.0003461	23	111	15	192
515	0.0003394	24	106	13	188
516	0.0003383	10	109	18	193
517	0.0003571	14	96	18	178
518	0.0003603	33	115	18	197
519	0.0003303	4	91	19	175
520	0.0003434	1	99	19	197
521	0.0003475	18	109	15	200
522	0.0003844	17	108	17	189
523	0.0003426	1	104	17	198
524	0.000344	14	103	16	192
525	0.0003783	22	101	17	179
526	0.0003436	5	113	16	221
527	0.0003903	2	87	15	172
528	0.0003433	18	98	13	178
529	0.0003338	4	95	16	186
530	0.0003844	31	110	17	189
531	0.0003875	6	108	18	210
532	0.0003454	48	120	17	192
533	0.0003431	1	80	15	159
534	0.0003702	33	126	17	219
535	0.000399	51	121	19	191
536	0.0004121	8	110	19	195
537	0.0004369	7	101	19	191
538	0.0003942	2	99	15	196
539	0.0003368	16	107	15	197
540	0.0003456	34	127	17	220
541	0.0003527	5	112	17	219
542	0.000421	49	120	18	176
543	0.000338	22	112	18	202
544	0.0003409	16	98	18	180
545	0.0003499	22	125	15	224
546	0.0003609	37	126	17	215
547	0.0003283	14	103	19	176
548	0.0003511	28	120	15	212
549	0.0003521	15	110	15	205
550	0.0003814	70	137	17	204
551	0.0003479	35	115	19	190
552	0.0003544	14	108	16	179
553	0.0004693	3	91	18	179
554	0.0003411	56	137	18	205
555	0.0003727	25	115	15	205
556	0.0003437	12	112	16	212
557	0.0004123	16	111	18	206
558	0.0003805	19	111	17	203
559	0.000391	39	115	17	191
560	0.0004091	61	140	16	219
561	0.000353	14	97	18	180
562	0.0004289	11	99	18	187
563	0.0003727	1	99	16	184
564	0.0003481	36	118	18	188
565	0.0003662	59	131	18	203
566	0.0004132	3	104	18	196
567	0.0003417	42	119	13	196
568	0.0003518	11	104	16	187
569	0.0003362	11	94	18	177
570	0.0003496	32	111	18	185
571	0.0003504	3	89	17	175
572	0.0003507	6	109	15	209
573	0.0003724	0	120	17	240
574	0.0003452	10	109	17	193
575	0.0003422	21	100	17	179
576	0.0003416	13	107	14	201
577	0.0003413	19	118	17	200
578	0.0003729	14	106	15	196
579	0.0003989	0	114	16	223
580	0.0003571	47	126	19	205
581	0.0003504	16	114	17	212
582	0.0003959	34	123	17	212
583	0.0003815	13	110	19	207
584	0.0003395	30	111	18	187
585	0.0003564	28	107	16	186
586	0.0003653	15	119	17	209
587	0.0004114	4	108	18	208
588	0.0003666	19	108	19	197
589	0.0003671	18	102	14	186
590	0.0003793	0	91	19	182
591	0.0003463	28	107	14	186
592	0.0004071	2	107	17	212
593	0.0003724	12	118	18	224
594	0.0003318	6	101	18	191
595	0.0003473	52	129	16	198
596	0.0003656	38	120	19	199
597	0.0003751	6	111	18	216
598	0.0003739	72	123	17	174
599	0.0003454	15	106	14	190
600	0.0003598	36	109	19	182
601	0.0003814	17	107	17	179
602	0.0003566	15	104	19	193
603	0.0003471	14	102	15	190
604	0.0003498	24	114	18	204
605	0.0003476	19	107	18	195
606	0.0003617	34	124	18	214
607	0.0003676	5	113	16	221
608	0.0003548	23	106	17	189
609	0.000349	15	119	18	223
610	0.000363	7	100	16	193
611	0.0003625	16	114	18	212
612	0.0003457	3	98	16	193
613	0.0003473	55	135	19	215
614	0.0003522	2	93	17	184
615	0.0003741	51	118	18	185
616	0.0003656	5	109	17	209
617	0.0003433	2	102	16	197
618	0.0003857	5	90	14	174
619	0.0003311	16	94	15	172
620	0.0003671	6	107	16	198
621	0.0003582	51	121	14	191
622	0.0003451	12	114	15	215
623	0.0003592	9	112	19	208
624	0.0003483	2	92	15	182
625	0.0003433	37	125	16	213
626	0.0003724	25	121	17	212
627	0.0004128	5	94	17	183
628	0.0003629	33	110	17	187
629	0.0003488	20	119	18	180
630	0.000357	13	115	18	217
631	0.0003601	1	107	18	213
632	0.0004923	5	108	15	211
633	0.0003515	8	89	15	170
634	0.0003863	2	105	19	208
635	0.0003532	2	96	16	190
636	0.0003522	20	114	18	208
637	0.0003398	17	109	16	201
638	0.0003494	20	92	17	164
639	0.0003532	5	105	19	205
640	0.0003291	37	118	18	192
641	0.0003627	6	104	16	195
642	0.0003558	32	102	19	172
643	0.0003579	5	109	19	210
644	0.0003519	10	106	17	202
645	0.0003523	36	123	19	210
646	0.0004741	2	103	17	204
647	0.00037	32	114	15	196
648	0.0003613	19	91	17	163
649	0.0004354	16	108	14	183
650	0.0003489	32	111	16	190
651	0.0003579	1	108	19	210
652	0.0003759	12	120	18	219
653	0.0003623	30	107	17	184
654	0.0004026	27	103	19	179
655	0.0003497	79	142	18	205
656	0.0003542	9	91	13	173
657	0.0003953	48	111	17	174
658	0.0003632	18	114	17	210
659	0.0003327	4	94	16	184
660	0.0004033	19	102	16	185
661	0.0003365	20	117	18	212
662	0.0003543	6	100	15	194
663	0.0003436	11	109	17	207
664	0.0003569	29	131	18	221
665	0.0003912	1	100	17	195
666	0.0003521	6	110	17	214
667	0.0003652	2	88	17	174
668	0.0003512	16	106	13	196
669	0.0003554	21	110	17	199
670	0.0003542	2	90	16	178
671	0.0003494	4	115	16	215
672	0.0003631	20	103	16	186
673	0.0003705	17	113	19	209
674	0.0003583	22	104	14	186
675	0.0003603	7	103	16	195
676	0.0004153	8	108	17	206
677	0.0003537	7	95	19	183
678	0.0003636	17	116	19	215
679	0.0004009	11	114	19	217
680	0.000347	15	108	16	201
681	0.0003443	15	123	17	225
682	0.0003875	41	130	17	219
683	0.0003403	23	123	17	208
684	0.0003499	5	95	16	185
685	0.0003591	31	107	15	183
686	0.0003558	13	102	16	190
687	0.000345	10	111	17	212
688	0.0003294	19	90	18	161
689	0.0003618	12	111	16	177
690	0.0003382	4	84	17	164
691	0.0003452	21	116	19	211
692	0.0003765	5	94	14	183
693	0.0003619	7	104	17	201
694	0.0003483	17	109	17	201
695	0.0003632	16	108	17	200
696	0.000365	22	102	19	182
697	0.0003612	25	128	17	212
698	0.0003536	37	121	19	205
699	0.0003475	3	87	15	163
700	0.0003624	21	105	17	189
701	0.0004026	0	107	17	214
702	0.0003537	13	103	19	193
703	0.0003567	5	99	19	190
704	0.0003865	6	94	19	180
705	0.0004181	46	124	17	202
706	0.0003591	86	156	17	226
707	0.0003755	5	100	17	195
708	0.0003699	21	107	16	193
709	0.0003384	12	105	18	196
710	0.0003486	22	96	15	169
711	0.0003455	6	97	17	188
712	0.0003293	9	96	15	183
713	0.0003641	11	108	16	201
714	0.0003902	41	127	17	213
715	0.0003601	26	113	16	197
716	0.0003591	1	103	15	205
717	0.0003524	18	100	18	182
718	0.0003418	1	94	15	187
719	0.0003412	2	96	18	188
720	0.0003592	22	120	14	218
721	0.0003604	12	110	16	207
722	0.0003415	19	104	17	189
723	0.0004278	27	120	18	213
724	0.0003385	9	91	17	169
725	0.0003569	31	119	17	207
726	0.0003987	18	108	17	198
727	0.0003543	21	91	17	161
728	0.0003516	24	111	16	198
729	0.0003339	42	112	15	177
730	0.0003349	13	85	15	157
731	0.0003489	29	122	19	215
732	0.0003486	13	121	19	229
733	0.0003489	12	99	19	184
734	0.0003856	38	111	19	184
735	0.0003393	6	91	19	176
736	0.0003604	51	131	17	203
737	0.0003947	22	104	19	186
738	0.0003505	37	119	17	201
739	0.0003677	4	97	18	190
740	0.0003578	12	108	18	202
741	0.000355	11	116	16	221
742	0.0004413	41	129	19	217
743	0.0003648	15	111	15	197
744	0.0003549	29	116	16	188
745	0.0003497	44	132	18	214
746	0.0003387	11	94	16	177
747	0.0003764	2	103	16	198
748	0.0003891	4	96	16	184
749	0.000375	45	125	18	205
750	0.0003917	34	119	17	204
751	0.0003346	4	94	17	184
752	0.0003584	7	101	18	194
753	0.0003345	23	108	16	193
754	0.0003653	15	100	18	185
755	0.0003593	15	104	15	185
756	0.0003306	33	109	19	185
757	0.0003473	34	130	18	226
758	0.0004025	9	95	18	181
759	0.0003665	37	121	14	199
760	0.0003443	51	118	17	185
761	0.0004216	9	101	18	193
762	0.0003285	39	110	18	181
763	0.0003622	12	106	16	200
764	0.0003765	11	101	16	191
765	0.00036	17	109	16	201
766	0.000355	15	112	17	209
767	0.0003393	38	125	19	209
768	0.0003626	7	111	18	215
769	0.0003523	24	116	18	197
770	0.0003458	29	109	17	185
771	0.0003375	13	102	17	191
772	0.0004012	16	100	16	184
773	0.0003551	19	110	19	201
774	0.0003656	40	124	17	208
775	0.0003609	26	121	17	216
776	0.0003395	8	102	16	196
777	0.0003615	39	124	17	199
778	0.0004466	29	101	17	173
779	0.0003582	27	113	14	199
780	0.0003472	29	104	18	179
781	0.0003378	0	80	15	160
782	0.0003804	28	119	16	210
783	0.0003371	4	105	18	188
784	0.0003847	16	110	18	204
785	0.0003787	16	102	19	188
786	0.0003916	18	97	14	176
787	0.0003545	13	102	14	191
788	0.0003419	7	97	18	186
789	0.0003459	4	97	17	190
790	0.0004227	39	127	15	202
791	0.0003482	18	108	16	198
792	0.000366	48	137	18	226
793	0.0003421	0	99	19	198
794	0.0003441	1	98	19	195
795	0.0003878	12	106	17	200
796	0.0003591	53	125	14	180
797	0.0003386	21	105	19	185
798	0.0003444	15	104	15	193
799	0.0003875	3	84	16	165
800	0.0004047	1	96	16	191
801	0.000334	29	108	19	187
802	0.0003414	1	88	16	175
803	0.0003614	27	109	18	191
804	0.0003704	4	102	16	199
805	0.0003454	19	101	14	183
806	0.0003547	16	112	17	198
807	0.0003522	16	120	19	220
808	0.0003935	7	100	16	193
809	0.0003665	7	98	19	189
810	0.0003942	24	132	17	231
811	0.0003714	10	106	18	202
812	0.0003622	10	108	19	206
813	0.000364	12	108	14	198
814	0.0003559	18	119	19	220
815	0.0003299	49	137	16	215
816	0.0003496	11	110	15	202
817	0.0003647	6	93	18	180
818	0.0003918	12	110	16	208
819	0.0003643	22	107	14	179
820	0.0003413	28	108	15	188
821	0.0003672	37	126	16	215
822	0.0003387	5	103	19	201
823	0.0003753	28	113	17	198
824	0.0003334	43	135	18	215
825	0.0003946	2	98	19	191
826	0.0003314	5	78	16	151
827	0.0003265	36	118	18	196
828	0.0003555	40	125	17	210
829	0.00035	28	108	18	188
830	0.0003852	17	129	18	238
831	0.0003527	29	124	17	219
832	0.0003419	3	101	19	199
833	0.0003734	2	103	18	198
834	0.000369	24	109	19	194
835	0.0003957	28	120	19	212
836	0.0003573	17	105	14	193
837	0.0003588	36	113	17	190
838	0.000358	12	105	18	198
839	0.000326	57	127	18	197
840	0.0003572	7	110	17	212
841	0.0003553	26	109	18	192
842	0.0003297	41	108	18	166
843	0.0003993	25	108	19	191
844	0.0003705	10	86	13	162
845	0.0003458	6	104	16	202
846	0.0003597	27	117	15	207
847	0.0003652	36	119	19	202
848	0.0003685	16	107	19	198
849	0.0003808	16	123	16	230
850	0.0003546	1	106	19	211
851	0.0003687	19	101	15	183
852	0.0003624	37	123	15	205
853	0.0003473	13	112	19	210
854	0.0003595	36	118	17	198
855	0.0003535	81	146	19	211
856	0.0003335	10	88	15	166
857	0.0003898	6	98	19	190
858	0.0003499	1	105	15	208
859	0.0003513	3	99	15	195
860	0.0003359	65	124	19	176
861	0.0003318	30	115	18	200
862	0.0003403	10	104	19	198
863	0.0003502	4	99	19	194
864	0.0003558	17	106	17	195
865	0.000338	5	94	15	183
866	0.0003731	15	116	19	217
867	0.0003603	27	117	17	207
868	0.0003623	15	115	18	215
869	0.0003445	48	130	19	212
870	0.0003644	93	165	17	237
871	0.0003798	37	115	17	193
872	0.0003663	2	108	18	207
873	0.0003588	2	110	18	218
874	0.0003471	33	118	16	183
875	0.0003502	10	104	18	194
876	0.0003501	38	119	19	200
877	0.0003505	27	108	19	187
878	0.0003421	17	94	15	171
879	0.000362	21	120	18	219
880	0.000337	17	113	18	209
881	0.0003448	8	101	18	180
882	0.0003502	3	90	17	177
883	0.0003549	48	116	17	184
884	0.0003876	7	98	17	189
885	0.0003549	38	113	16	188
886	0.000346	61	127	19	193
887	0.0003574	8	99	16	190
888	0.0003405	41	109	19	177
889	0.0003631	7	100	18	193
890	0.0003536	3	96	17	189
891	0.0003541	4	104	18	201
892	0.0003427	4	94	18	184
893	0.0003496	34	116	16	198
894	0.0003548	5	104	15	203
895	0.0003289	9	99	16	184
896	0.0003736	12	107	16	202
897	0.0003385	20	100	16	180
898	0.0003582	12	101	16	190
899	0.000335	15	109	16	203
900	0.0003621	6	95	16	184
901	0.000343	3	98	17	188
902	0.0003255	17	112	17	194
903	0.0003552	30	117	18	204
904	0.0003626	16	111	17	206
905	0.0004006	19	108	16	197
906	0.0003466	13	98	19	183
907	0.000376	0	96	16	186
908	0.0003318	0	81	16	162
909	0.0003385	2	92	19	182
910	0.00036	21	130	18	223
911	0.0003465	10	96	18	182
912	0.0003715	4	122	19	240
913	0.0003439	28	106	17	177
914	0.000352	9	125	19	241
915	0.0003354	26	99	18	172
916	0.0003332	1	101	17	184
917	0.0003561	12	110	17	207
918	0.0003623	15	103	19	191
919	0.0003385	34	127	17	209
920	0.0003552	31	117	18	203
921	0.0003782	27	125	16	210
922	0.0003636	11	104	16	197
923	0.000342	18	93	14	165
924	0.0003324	35	119	18	203
925	0.000345	2	92	17	182
926	0.0004284	59	122	19	185
927	0.0003328	32	118	18	195
928	0.0003429	15	105	16	195
929	0.00034	3	80	13	157
930	0.0004044	43	129	17	215
931	0.00041	5	103	18	201
932	0.000347	3	95	15	184
933	0.0003491	20	96	16	172
934	0.0003654	19	107	16	195
935	0.0003823	2	103	15	204
936	0.0003493	6	91	18	176
937	0.0003415	18	109	18	200
938	0.0003622	34	109	18	184
939	0.0003468	31	108	14	185
940	0.0003698	13	103	16	185
941	0.0003568	5	87	13	169
942	0.0003899	26	115	16	199
943	0.0003502	6	104	16	190
944	0.0003533	5	97	18	189
945	0.0003587	6	104	17	202
946	0.0003367	53	119	17	185
947	0.0003669	5	115	16	222
948	0.00033	3	87	12	171
949	0.0003632	19	99	19	179
950	0.0003489	11	98	17	185
951	0.0003699	22	110	19	198
952	0.0003644	20	114	17	205
953	0.0003486	20	106	18	192
954	0.0003336	3	93	17	183
955	0.0003527	10	116	18	222
956	0.0003439	10	93	16	176
957	0.0003447	4	101	18	198
958	0.0003499	33	112	19	174
959	0.0003517	29	119	18	209
960	0.0003387	12	121	17	218
961	0.0003568	8	98	18	188
962	0.0003453	19	105	15	191
963	0.0003802	5	87	15	169
964	0.0003524	5	100	17	195
965	0.0003392	39	102	16	165
966	0.0003365	25	106	16	187
967	0.0003404	35	111	15	187
968	0.0003578	71	135	16	199
969	0.0003526	30	105	15	178
970	0.0003648	3	107	18	198
971	0.0003473	9	107	16	205
972	0.0003502	10	110	19	200
973	0.0003622	28	104	19	180
974	0.0003831	3	109	19	215
975	0.0003885	18	122	16	226
976	0.0003586	32	119	18	200
977	0.0003735	30	111	19	192
978	0.0003382	16	97	19	176
979	0.000345	3	108	19	195
980	0.000331	22	115	18	196
981	0.0003279	23	95	19	165
982	0.0003708	29	120	15	211
983	0.0004026	26	115	17	204
984	0.0003641	37	102	18	167
985	0.000343	44	133	19	221
986	0.0003639	31	118	14	205
987	0.0003271	73	143	17	210
988	0.0004091	31	115	18	199
989	0.0003738	11	101	18	191
990	0.0003719	28	118	17	203
991	0.0003758	14	121	15	228
992	0.000368	17	113	19	209
993	0.0003538	10	103	18	196
994	0.0003309	9	102	18	180
995	0.0003544	17	107	19	184
996	0.0003616	7	101	16	195
997	0.0003891	5	108	17	208
998	0.0003579	8	106	19	204
999	0.0003624	31	140	18	241
mean	0.000360489	19.515	108.364	17.035	194.957

## Sheet: PolyMin_SEq
	time	SEq	Bal	Reg	Egal
0	0.0029955	37	115	17	193
1	0.0029938	6	101	17	196
2	0.0028213	21	94	13	167
3	0.0030399	23	109	17	195
4	0.0027698	1	103	19	205
5	0.0026233	1	102	16	203
6	0.0029754	20	119	19	218
7	0.0028261	8	110	16	212
8	0.0026624	32	117	19	202
9	0.002762	34	114	17	194
10	0.0027075	80	151	19	222
11	0.0029291	39	129	16	219
12	0.0025141	29	101	18	173
13	0.0028079	14	92	17	170
14	0.0031149	43	120	17	197
15	0.0028332	36	131	18	226
16	0.003178	75	124	18	173
17	0.0027593	4	84	19	164
18	0.0026163	9	105	17	201
19	0.0027766	22	102	17	182
20	0.0031667	19	109	19	199
21	0.0027068	2	109	18	216
22	0.0026078	2	102	17	202
23	0.0028513	40	124	18	208
24	0.002933	54	128	19	202
25	0.0028761	11	113	17	215
26	0.0028663	3	90	18	177
27	0.0031291	25	110	16	195
28	0.0030324	8	99	18	190
29	0.0028458	46	129	16	212
30	0.0031038	13	104	16	195
31	0.0025917	23	117	17	211
32	0.0032461	12	107	18	202
33	0.002905	22	92	14	162
34	0.003076	18	110	17	202
35	0.0026802	35	94	17	153
36	0.0028374	13	115	16	217
37	0.0029311	36	109	17	182
38	0.0029308	2	102	19	202
39	0.0029909	4	97	18	190
40	0.0029429	24	127	17	230
41	0.0029536	10	91	15	172
42	0.002877	25	108	15	191
43	0.0026723	61	139	19	217
44	0.0029078	1	108	18	215
45	0.0026109	1	83	15	165
46	0.0028815	24	91	13	158
47	0.0029552	40	115	19	190
48	0.0029314	12	108	16	204
49	0.0029092	2	121	17	240
50	0.0028667	43	116	17	189
51	0.0028946	15	110	18	205
52	0.0029756	6	89	13	172
53	0.0031722	11	109	19	207
54	0.0027914	16	108	19	200
55	0.0029909	6	96	15	186
56	0.0033508	18	117	17	216
57	0.0027909	3	115	16	227
58	0.002732	14	97	16	180
59	0.0028972	30	120	18	210
60	0.0026427	49	120	17	191
61	0.0028311	8	116	17	224
62	0.0027658	16	103	19	190
63	0.0028992	14	99	15	184
64	0.0028297	1	112	18	223
65	0.0028735	7	96	19	185
66	0.002785	9	103	18	197
67	0.0027829	9	94	15	179
68	0.0028584	19	108	14	197
69	0.0028984	14	101	16	188
70	0.0028691	7	103	19	199
71	0.0029078	58	132	17	206
72	0.0028567	12	108	18	204
73	0.0036827	16	104	13	192
74	0.0027569	38	106	16	174
75	0.0027109	44	107	17	170
76	0.0029643	6	99	19	192
77	0.0026082	8	85	18	162
78	0.0027612	4	97	19	190
79	0.0028357	44	116	17	188
80	0.002881	4	90	15	176
81	0.002848	29	104	17	179
82	0.0029597	48	114	16	180
83	0.0025762	42	107	14	172
84	0.0028644	13	107	15	201
85	0.0027139	1	88	18	175
86	0.0028531	35	115	17	195
87	0.002973	4	100	18	196
88	0.0031746	10	116	15	222
89	0.0031178	55	130	17	205
90	0.0029165	55	121	18	187
91	0.0029096	16	107	15	198
92	0.0025895	31	108	18	185
93	0.0028807	17	105	18	193
94	0.0030103	2	99	19	196
95	0.0026724	9	88	14	167
96	0.0027969	21	110	16	199
97	0.0030766	21	116	17	211
98	0.0030099	3	94	13	185
99	0.0026187	15	95	13	175
100	0.0026338	28	107	19	186
101	0.0027176	7	101	19	195
102	0.002645	1	94	19	187
103	0.0031394	10	107	19	204
104	0.0029121	20	99	16	178
105	0.0028566	43	112	17	181
106	0.0027097	27	109	19	191
107	0.0028666	49	114	17	179
108	0.0025634	34	111	19	188
109	0.0030309	14	109	18	204
110	0.0026435	16	104	15	192
111	0.0030365	34	109	19	184
112	0.0033128	21	101	18	181
113	0.002752	59	131	18	203
114	0.0028546	16	111	17	206
115	0.0028269	3	103	19	203
116	0.0026391	43	132	17	221
117	0.0029498	8	99	19	190
118	0.00297	18	112	15	206
119	0.0026446	16	101	16	186
120	0.002941	14	91	17	168
121	0.0030397	17	116	17	215
122	0.0029992	31	96	18	161
123	0.0029504	3	106	17	209
124	0.0032434	14	111	14	208
125	0.0027854	62	128	15	194
126	0.0029916	11	115	19	219
127	0.0029599	24	124	15	224
128	0.0026581	22	112	17	202
129	0.0029099	3	116	16	229
130	0.0031407	13	112	15	211
131	0.0026486	56	125	16	194
132	0.0028783	12	95	17	178
133	0.0029814	1	116	16	231
134	0.0030667	44	121	14	198
135	0.0027066	41	115	15	189
136	0.0027231	10	112	19	214
137	0.002881	1	106	18	211
138	0.002965	20	111	18	202
139	0.0028176	19	113	15	207
140	0.0029427	6	107	16	208
141	0.0029291	40	132	18	224
142	0.0027064	32	117	18	202
143	0.0027938	1	105	18	209
144	0.002926	26	87	17	148
145	0.0030551	6	109	19	212
146	0.0026183	5	94	17	183
147	0.0029777	30	111	16	192
148	0.0029916	39	109	17	179
149	0.0030287	15	93	18	171
150	0.0031154	16	121	17	226
151	0.0030959	17	110	19	203
152	0.0026249	25	105	19	185
153	0.0028333	6	98	15	190
154	0.0029141	7	106	19	205
155	0.0030077	9	101	18	193
156	0.0030514	2	96	18	190
157	0.0027576	5	101	18	197
158	0.0029344	4	92	17	180
159	0.0028453	3	98	18	193
160	0.0027499	18	100	15	182
161	0.0029428	0	95	18	190
162	0.0026664	12	93	13	174
163	0.0028407	16	100	15	184
164	0.0031505	9	107	19	205
165	0.0029168	7	100	15	193
166	0.0030132	1	111	13	221
167	0.003037	38	128	16	218
168	0.0028329	5	78	16	151
169	0.0029833	22	108	15	194
170	0.0026029	13	87	15	161
171	0.00281	8	99	19	190
172	0.0029115	42	122	16	202
173	0.002886	12	105	15	198
174	0.0029502	3	90	18	177
175	0.0028374	4	94	17	184
176	0.0030043	25	109	17	193
177	0.002872	42	119	18	196
178	0.0029553	5	87	15	169
179	0.0029741	24	117	16	210
180	0.0027418	24	121	17	218
181	0.0029428	7	97	17	187
182	0.0030517	36	116	18	196
183	0.0026333	9	99	19	189
184	0.0029075	5	108	18	211
185	0.0027798	11	89	17	167
186	0.0028317	23	106	17	189
187	0.003019	14	113	17	212
188	0.0029173	22	122	18	222
189	0.0026851	18	104	15	190
190	0.0027411	2	101	17	200
191	0.0030719	2	115	16	228
192	0.0027603	1	100	15	199
193	0.0029465	9	117	19	225
194	0.0026484	15	121	17	227
195	0.0025217	37	112	18	187
196	0.0027336	14	114	18	214
197	0.0027758	29	102	13	175
198	0.002916	8	96	18	184
199	0.0026447	32	121	19	210
200	0.002756	31	122	19	213
201	0.0028956	33	107	18	181
202	0.0026959	25	105	16	185
203	0.0027958	42	109	17	176
204	0.003011	5	102	18	199
205	0.0030247	6	109	19	212
206	0.0028666	4	100	16	196
207	0.0029488	10	116	17	222
208	0.0028068	2	107	16	212
209	0.002945	31	106	19	181
210	0.0027403	1	101	16	201
211	0.0031177	21	104	16	187
212	0.0026889	3	100	15	197
213	0.0029114	5	84	14	163
214	0.0026392	14	111	19	208
215	0.0029454	26	104	17	182
216	0.0026809	12	110	18	208
217	0.0027525	24	113	19	202
218	0.0028589	22	107	18	192
219	0.0028052	28	99	15	170
220	0.0029785	7	103	17	199
221	0.0026384	33	119	18	205
222	0.0028124	24	99	18	174
223	0.0032135	10	95	17	180
224	0.0028281	17	108	19	199
225	0.0028249	41	110	14	179
226	0.0030125	24	122	16	220
227	0.0028933	4	113	16	222
228	0.0026756	37	113	16	189
229	0.0029119	3	93	15	183
230	0.003	35	110	16	185
231	0.0028118	3	87	18	171
232	0.0029055	17	108	18	199
233	0.0028962	52	112	15	172
234	0.0030842	40	119	17	198
235	0.0028052	9	99	19	189
236	0.0027565	40	126	19	212
237	0.002873	14	106	19	198
238	0.0027867	10	94	17	178
239	0.0029391	19	99	15	179
240	0.0031395	0	94	18	188
241	0.0027799	9	105	19	201
242	0.0026633	11	85	17	159
243	0.0026939	25	109	16	193
244	0.0026399	15	107	18	199
245	0.0026634	36	108	17	180
246	0.0030838	5	77	17	149
247	0.0027516	4	111	18	218
248	0.0029902	14	91	18	168
249	0.0026549	56	126	15	196
250	0.002877	6	104	16	202
251	0.0025771	67	138	17	209
252	0.0029933	23	108	17	193
253	0.002923	37	106	18	175
254	0.0032166	3	107	14	211
255	0.0026964	14	110	17	206
256	0.0030414	0	109	18	218
257	0.0027956	11	98	14	185
258	0.0026432	19	104	18	189
259	0.0028809	16	94	17	172
260	0.0028824	16	107	16	198
261	0.0036689	5	112	17	219
262	0.0028845	41	123	19	205
263	0.0028145	14	117	18	220
264	0.0028295	15	105	14	195
265	0.0028202	24	125	19	226
266	0.0028467	9	117	17	225
267	0.0025752	24	98	18	172
268	0.0029647	57	125	18	193
269	0.0028726	35	107	16	179
270	0.0031251	16	101	18	186
271	0.0029423	12	99	14	186
272	0.0027973	72	128	17	184
273	0.0026686	15	110	19	205
274	0.0027995	17	114	17	211
275	0.0032007	21	88	13	155
276	0.003005	4	109	17	214
277	0.0027226	27	102	19	177
278	0.0028822	30	116	19	202
279	0.0029258	29	104	16	179
280	0.0028095	13	100	15	187
281	0.0030253	25	118	16	211
282	0.0026919	15	107	17	199
283	0.002783	43	111	12	179
284	0.0026684	22	100	16	178
285	0.0026705	27	107	16	187
286	0.0030666	36	118	16	200
287	0.0029939	6	90	19	174
288	0.0028938	8	112	15	216
289	0.0030236	29	120	16	211
290	0.002765	4	83	14	162
291	0.0030648	10	106	18	202
292	0.0029288	3	96	19	189
293	0.0028307	9	89	19	169
294	0.0026767	69	136	19	203
295	0.0028885	4	105	19	206
296	0.0025809	14	108	19	202
297	0.0029065	14	107	17	200
298	0.0025354	14	96	19	178
299	0.0028076	33	109	17	185
300	0.0026232	13	114	17	215
301	0.0030112	59	125	16	191
302	0.0029402	16	107	16	198
303	0.0027625	2	94	17	186
304	0.0028574	25	107	18	189
305	0.0027015	4	80	15	156
306	0.0031216	0	96	19	192
307	0.0025832	17	108	18	199
308	0.0026587	9	103	19	197
309	0.0031678	0	93	18	186
310	0.002798	3	83	19	163
311	0.0026877	18	109	18	200
312	0.002829	28	118	19	208
313	0.0028325	3	113	16	223
314	0.0029766	2	90	17	178
315	0.0031027	12	107	15	202
316	0.0029527	25	103	14	181
317	0.0027512	16	100	18	184
318	0.0028557	2	90	19	178
319	0.0028739	1	103	17	205
320	0.0030444	23	103	15	183
321	0.002584	32	108	18	184
322	0.0032374	73	138	18	203
323	0.0029592	6	84	17	162
324	0.0029617	6	97	16	188
325	0.0028272	24	104	13	184
326	0.0030837	6	96	18	186
327	0.0029977	20	119	17	218
328	0.0030378	54	127	19	200
329	0.0028106	48	116	18	184
330	0.0028753	4	97	19	190
331	0.0029742	1	90	15	179
332	0.0027465	27	104	15	181
333	0.0030628	14	106	18	198
334	0.0027648	64	126	18	188
335	0.003032	32	123	18	214
336	0.0030718	42	124	19	206
337	0.0027862	31	131	17	231
338	0.0032292	15	103	17	191
339	0.003	29	125	17	221
340	0.0030629	21	110	16	199
341	0.002837	39	109	18	179
342	0.0028258	5	97	15	189
343	0.0026132	3	104	19	205
344	0.0028303	14	100	17	186
345	0.002829	66	122	19	178
346	0.0028226	4	85	15	166
347	0.0030758	9	102	18	195
348	0.0031502	11	108	17	205
349	0.0029668	21	109	18	197
350	0.0030109	42	126	16	210
351	0.0027678	66	123	18	180
352	0.0028284	3	101	18	199
353	0.0026953	50	136	19	222
354	0.0025353	29	101	18	173
355	0.0026651	40	123	18	206
356	0.0030411	4	104	17	204
357	0.0027207	4	84	15	164
358	0.002987	48	104	18	160
359	0.0026941	36	121	17	206
360	0.0026461	65	131	18	197
361	0.0030656	1	85	15	169
362	0.0027633	32	121	19	210
363	0.0026629	8	90	13	172
364	0.0029622	60	125	18	190
365	0.0030679	8	105	19	202
366	0.0027862	23	123	19	223
367	0.0028667	10	109	14	208
368	0.0025944	7	82	18	157
369	0.0029397	14	95	19	176
370	0.0028587	22	100	15	178
371	0.0028954	6	110	17	214
372	0.0029015	22	105	18	188
373	0.0031737	14	94	19	174
374	0.0028595	3	87	17	171
375	0.003129	16	97	17	178
376	0.0029479	23	107	19	191
377	0.0028145	31	95	15	159
378	0.0028608	24	102	18	180
379	0.00283	11	113	17	215
380	0.0029701	4	99	17	194
381	0.0028782	15	115	19	215
382	0.0027313	5	110	19	215
383	0.0029475	22	111	18	200
384	0.0029283	35	110	15	185
385	0.0028932	10	112	17	214
386	0.0028457	25	107	18	189
387	0.0031053	45	132	18	219
388	0.0029389	35	118	19	201
389	0.0029521	37	117	12	197
390	0.0030261	1	105	15	209
391	0.0027808	6	129	19	252
392	0.0031635	5	115	19	225
393	0.0032208	1	104	19	207
394	0.0027113	20	102	18	184
395	0.0028712	39	113	18	187
396	0.002743	61	135	17	209
397	0.0028585	4	90	17	176
398	0.0028919	21	108	16	195
399	0.0025797	83	150	17	217
400	0.0030711	14	101	18	188
401	0.0030064	1	105	18	209
402	0.0030682	4	81	18	158
403	0.0028607	8	109	17	210
404	0.0026505	33	120	19	207
405	0.0030502	22	101	18	180
406	0.003207	13	124	18	235
407	0.0027176	0	95	15	190
408	0.0029087	2	100	16	198
409	0.0028485	22	108	18	194
410	0.0029504	23	122	17	221
411	0.0025793	17	98	17	179
412	0.0028145	4	97	17	190
413	0.0028312	28	123	19	218
414	0.0027565	29	95	16	161
415	0.0030009	6	105	17	204
416	0.003024	8	98	15	188
417	0.0027426	57	134	19	211
418	0.003077	16	100	16	184
419	0.0029483	12	97	17	182
420	0.0026796	28	121	18	214
421	0.002731	2	98	17	194
422	0.0028424	1	92	16	183
423	0.0028991	10	96	13	182
424	0.0027816	19	113	19	207
425	0.0031423	55	132	16	209
426	0.0028203	21	99	19	177
427	0.002765	4	84	15	164
428	0.0029705	47	121	16	195
429	0.0030989	58	129	19	200
430	0.0027004	17	117	18	217
431	0.0033266	11	115	15	219
432	0.0028251	28	110	15	192
433	0.0028517	4	105	17	206
434	0.0030848	42	121	17	200
435	0.0025562	2	90	18	178
436	0.0030587	22	130	19	238
437	0.0027735	1	91	16	181
438	0.0027533	47	126	15	205
439	0.0026489	13	108	17	203
440	0.0029457	4	102	16	200
441	0.0028017	8	98	17	188
442	0.0029766	33	119	18	205
443	0.0028206	10	110	19	210
444	0.0026509	7	111	18	215
445	0.0030237	92	147	18	202
446	0.002596	21	111	18	201
447	0.0026048	3	96	16	189
448	0.0029866	25	109	19	193
449	0.0028826	10	102	19	194
450	0.0030314	8	104	19	200
451	0.0026936	22	100	15	178
452	0.0028517	5	91	15	177
453	0.0030617	38	121	17	204
454	0.0026382	22	108	19	194
455	0.0030307	3	91	19	179
456	0.0026286	26	119	19	212
457	0.0036297	39	123	16	207
458	0.0029925	10	95	19	180
459	0.0028793	88	157	18	226
460	0.0030244	19	119	18	219
461	0.0029216	4	111	18	218
462	0.0028295	5	108	15	211
463	0.0031318	2	108	16	214
464	0.0032779	14	110	16	206
465	0.0026214	8	115	19	222
466	0.0029837	7	93	17	179
467	0.0026183	17	92	15	167
468	0.0029302	34	116	17	198
469	0.0028764	30	114	15	198
470	0.002589	35	114	16	193
471	0.0027885	19	111	18	203
472	0.0026987	21	102	19	183
473	0.0029421	40	122	17	204
474	0.002603	2	109	18	216
475	0.0030443	16	104	17	192
476	0.0028251	2	77	12	152
477	0.0029628	31	122	16	213
478	0.0029992	2	91	14	180
479	0.0028498	31	108	14	185
480	0.00287	12	100	16	188
481	0.0032355	66	128	17	190
482	0.002944	14	108	16	202
483	0.0029412	9	110	19	211
484	0.0026993	22	96	18	170
485	0.0027339	3	89	19	175
486	0.0031417	8	116	19	224
487	0.0027922	35	126	16	217
488	0.0026058	2	95	19	188
489	0.0029221	61	134	16	207
490	0.0030467	2	107	17	212
491	0.0029475	15	106	16	197
492	0.0031238	15	113	18	211
493	0.002885	54	121	16	188
494	0.0029229	25	107	16	189
495	0.0030778	9	110	17	211
496	0.0027691	8	107	17	206
497	0.0028905	26	102	18	178
498	0.0031149	25	100	14	175
499	0.0028601	4	106	18	208
500	0.0028418	10	95	16	180
501	0.0026443	27	109	15	191
502	0.0029115	29	111	18	193
503	0.0030717	3	102	14	201
504	0.0026884	6	102	15	198
505	0.002673	37	126	19	215
506	0.0032138	11	113	14	215
507	0.0030593	52	138	18	224
508	0.002951	9	89	17	169
509	0.00303	8	106	17	204
510	0.0025732	12	113	19	214
511	0.0025977	1	88	16	175
512	0.0028229	20	111	19	202
513	0.0028536	7	98	19	189
514	0.0030446	9	99	14	189
515	0.0028922	6	95	14	184
516	0.002938	10	109	18	208
517	0.0027496	14	96	18	178
518	0.0028069	33	115	18	197
519	0.0029107	4	91	19	178
520	0.002938	1	99	19	197
521	0.0029528	18	109	15	200
522	0.0028392	37	113	17	189
523	0.0029383	1	104	17	207
524	0.002702	14	103	16	192
525	0.0028068	22	101	17	180
526	0.0028716	5	113	16	221
527	0.0026945	2	87	15	172
528	0.0030691	0	87	13	174
529	0.0029417	26	105	16	184
530	0.0028258	31	110	17	189
531	0.0028217	6	108	18	210
532	0.0027407	48	120	17	192
533	0.0025854	1	80	15	159
534	0.0030319	7	117	16	227
535	0.0026032	51	121	19	191
536	0.0029431	35	117	18	199
537	0.0027583	7	101	19	195
538	0.0030676	2	99	15	196
539	0.0027651	3	99	14	195
540	0.0028089	34	127	17	220
541	0.0028665	5	112	17	219
542	0.0031312	16	103	15	190
543	0.0030475	22	112	18	202
544	0.0028328	16	98	18	180
545	0.0031634	12	120	15	228
546	0.003037	8	111	14	214
547	0.0028514	34	105	19	176
548	0.0031539	20	118	15	216
549	0.0026544	15	110	15	205
550	0.0026573	70	137	17	204
551	0.0030938	26	105	17	184
552	0.0029868	37	108	16	179
553	0.0029735	8	93	18	178
554	0.002987	9	102	18	195
555	0.0028994	21	117	15	213
556	0.0031489	12	112	16	212
557	0.003039	16	111	18	206
558	0.0030448	19	111	19	203
559	0.0027464	39	115	17	191
560	0.002623	61	140	16	219
561	0.0026716	14	97	18	180
562	0.0029966	11	99	18	187
563	0.0029472	18	101	16	184
564	0.0030678	1	96	18	191
565	0.0026421	59	131	18	203
566	0.0028593	3	104	18	205
567	0.0030401	61	128	13	195
568	0.0028695	15	101	16	187
569	0.0027462	11	94	18	177
570	0.0029219	32	111	18	190
571	0.0029573	3	89	17	175
572	0.0028751	6	110	15	214
573	0.0031437	0	120	17	240
574	0.0030135	10	109	17	208
575	0.0028788	21	100	17	179
576	0.0031036	13	107	14	201
577	0.0037119	56	133	17	210
578	0.0029618	14	112	15	210
579	0.0032414	0	114	16	228
580	0.002779	47	126	19	205
581	0.0030596	1	105	17	209
582	0.0027118	34	123	17	212
583	0.0030538	13	110	19	207
584	0.0029443	35	111	18	187
585	0.0028134	28	107	16	186
586	0.002891	44	126	16	208
587	0.0029444	4	108	18	212
588	0.0031278	19	108	19	197
589	0.0027797	18	102	14	186
590	0.002933	38	109	19	180
591	0.0029389	16	102	14	188
592	0.002873	2	107	19	212
593	0.0027756	12	118	18	224
594	0.0030298	25	108	18	191
595	0.003029	60	129	16	198
596	0.0030946	16	111	17	206
597	0.0029562	6	111	18	216
598	0.0030354	72	123	17	174
599	0.0028876	41	114	14	187
600	0.0031125	36	109	19	182
601	0.0032168	49	114	17	179
602	0.0026864	15	104	19	193
603	0.00277	14	102	15	190
604	0.0032179	4	104	17	204
605	0.0028054	19	107	18	195
606	0.002947	62	138	18	214
607	0.0028164	5	113	16	221
608	0.0026712	23	106	17	189
609	0.0029078	33	125	17	217
610	0.0026913	7	100	16	193
611	0.0027419	16	114	18	212
612	0.0028776	3	98	16	193
613	0.0031295	55	135	19	215
614	0.002891	2	93	17	184
615	0.0027333	51	118	18	185
616	0.0030912	35	122	17	209
617	0.0030533	37	117	16	197
618	0.0030006	10	92	14	174
619	0.0026789	16	94	15	172
620	0.0029012	6	107	16	208
621	0.0028397	51	121	15	191
622	0.0030449	12	114	15	216
623	0.0028684	28	118	19	208
624	0.0027591	2	92	15	182
625	0.0031413	7	110	19	213
626	0.0030022	7	118	17	229
627	0.0027451	5	94	17	183
628	0.0030483	33	110	17	187
629	0.0031119	5	106	17	207
630	0.0031313	8	112	16	216
631	0.0031928	1	107	18	213
632	0.0027265	5	108	15	211
633	0.002783	8	89	15	170
634	0.0028186	2	105	19	208
635	0.0028961	2	96	16	190
636	0.0028567	38	122	19	206
637	0.0027779	17	109	16	201
638	0.0027545	20	92	17	164
639	0.0029405	5	105	19	205
640	0.0030145	12	102	18	192
641	0.0027907	6	104	16	202
642	0.0025781	32	102	19	172
643	0.0030917	44	126	19	208
644	0.0031116	10	106	17	202
645	0.0028252	36	123	19	210
646	0.0026476	2	103	17	204
647	0.0032923	32	114	15	196
648	0.0025501	19	91	17	163
649	0.002919	25	103	14	181
650	0.0028814	32	111	16	190
651	0.0029906	18	114	19	210
652	0.0029584	57	138	18	219
653	0.0026251	30	107	17	184
654	0.0025797	27	103	19	179
655	0.002662	79	142	18	205
656	0.0029377	9	91	15	173
657	0.0027492	48	111	17	174
658	0.0026962	18	114	17	210
659	0.0029471	4	94	16	184
660	0.0031647	19	102	16	185
661	0.003029	4	106	18	208
662	0.0030399	6	100	15	194
663	0.0030895	11	109	17	207
664	0.0029907	58	138	18	218
665	0.0028211	33	114	17	195
666	0.0028984	6	110	17	214
667	0.0028832	2	88	17	174
668	0.0028276	16	106	13	196
669	0.0029588	21	110	17	199
670	0.0029339	2	90	16	178
671	0.0029209	25	120	16	215
672	0.0030476	20	103	16	186
673	0.0029358	17	113	19	209
674	0.002853	22	104	15	186
675	0.0030623	7	103	16	199
676	0.0030326	26	116	17	206
677	0.0028483	7	95	19	183
678	0.0026821	17	116	19	215
679	0.0026364	11	114	19	217
680	0.0029277	15	108	16	201
681	0.0029044	15	123	17	231
682	0.0026342	41	130	17	219
683	0.0030966	23	123	17	223
684	0.0026177	5	95	16	185
685	0.0027906	31	107	15	183
686	0.0029791	34	110	15	186
687	0.0031474	4	107	18	210
688	0.0029994	19	90	18	161
689	0.0028826	57	117	16	177
690	0.0027102	4	84	17	164
691	0.0030079	11	111	18	211
692	0.0029171	0	92	14	184
693	0.0027338	7	104	17	201
694	0.0031609	11	100	15	189
695	0.0029347	28	114	17	200
696	0.0027887	22	102	19	182
697	0.0029381	64	138	17	212
698	0.0027769	37	121	19	205
699	0.0028374	3	87	15	171
700	0.0026691	21	105	17	189
701	0.0026057	0	107	17	214
702	0.0026855	13	103	19	193
703	0.003041	24	107	19	190
704	0.0027882	19	96	19	173
705	0.0027179	46	124	17	202
706	0.0026819	86	156	17	226
707	0.0026922	5	100	17	195
708	0.002776	21	107	16	193
709	0.0030218	14	105	18	196
710	0.0028528	22	96	15	170
711	0.0030697	6	97	17	188
712	0.0028715	9	96	15	183
713	0.0028148	29	115	16	201
714	0.0025937	41	127	17	213
715	0.0029199	3	106	16	209
716	0.0032099	1	103	15	205
717	0.0027999	18	100	18	182
718	0.002647	1	94	15	187
719	0.003079	18	103	18	188
720	0.0031662	22	120	14	218
721	0.0029786	12	110	16	208
722	0.0028685	19	104	17	189
723	0.0029431	27	120	18	213
724	0.0029239	41	105	17	169
725	0.0029579	31	119	17	207
726	0.0030361	18	108	17	198
727	0.0028688	21	91	17	161
728	0.0029383	24	111	16	198
729	0.002852	42	112	15	182
730	0.0028718	8	80	19	152
731	0.0034592	26	129	17	232
732	0.0027217	13	121	19	229
733	0.0027783	12	99	19	186
734	0.0026935	38	111	19	184
735	0.0029783	6	91	19	176
736	0.0030965	51	131	17	211
737	0.0028369	22	104	19	186
738	0.0029656	37	119	17	201
739	0.0027122	4	97	18	190
740	0.0028504	43	125	18	207
741	0.0029728	11	116	16	221
742	0.002787	41	129	19	217
743	0.0029757	15	111	15	207
744	0.0028942	29	116	16	203
745	0.002886	44	132	18	220
746	0.0026091	11	94	16	177
747	0.0029031	42	120	16	198
748	0.0030831	64	124	16	184
749	0.0026984	45	125	18	205
750	0.0031532	34	119	17	204
751	0.0025549	4	94	17	184
752	0.0029138	7	101	18	195
753	0.0028798	23	108	16	193
754	0.0028908	15	100	19	185
755	0.0029688	39	112	15	185
756	0.0037715	25	103	19	181
757	0.002669	34	130	18	226
758	0.0028771	9	95	19	181
759	0.0030064	37	121	14	205
760	0.0029532	51	118	17	185
761	0.0029132	2	98	17	194
762	0.0029931	39	121	18	203
763	0.002661	12	106	16	200
764	0.0026391	11	101	16	191
765	0.0029556	8	104	16	200
766	0.0029574	34	120	17	206
767	0.0031546	38	125	19	212
768	0.0026183	7	111	18	215
769	0.0031279	19	105	18	191
770	0.0031812	10	98	15	186
771	0.0029568	13	102	17	191
772	0.0027935	16	100	19	184
773	0.002578	19	110	19	201
774	0.0030735	40	124	17	208
775	0.0027702	26	121	17	216
776	0.0030066	8	102	16	196
777	0.0027768	57	128	17	199
778	0.002555	29	101	17	173
779	0.0030619	27	113	14	199
780	0.0026216	29	104	18	179
781	0.0029595	12	82	15	152
782	0.0026935	28	119	16	210
783	0.0029063	48	118	18	188
784	0.0028392	16	110	18	204
785	0.0025802	16	102	19	188
786	0.0026529	18	97	14	176
787	0.0027963	13	102	14	191
788	0.0028301	7	97	18	187
789	0.0030703	4	97	17	190
790	0.0031742	2	100	19	198
791	0.0026067	18	108	16	198
792	0.0026636	48	137	18	226
793	0.002792	0	99	19	198
794	0.002971	1	98	19	195
795	0.002837	12	106	17	200
796	0.002971	70	125	14	180
797	0.0029445	6	99	18	192
798	0.0030694	15	104	15	193
799	0.0026037	3	84	16	165
800	0.0027639	1	96	16	191
801	0.003242	8	108	19	208
802	0.0027018	1	88	16	175
803	0.0026567	27	109	18	191
804	0.0028921	13	106	16	199
805	0.0030939	19	101	14	183
806	0.0028696	16	113	17	210
807	0.0031705	3	111	19	219
808	0.0027575	7	100	16	193
809	0.0029728	51	117	19	183
810	0.0029891	2	121	15	240
811	0.0030959	17	109	18	201
812	0.002691	10	108	19	206
813	0.0027734	32	115	14	198
814	0.0030422	18	119	19	220
815	0.0032008	49	137	16	225
816	0.0030391	10	105	15	200
817	0.0025743	6	93	18	180
818	0.0029598	12	110	16	208
819	0.0029467	45	112	14	179
820	0.0028073	28	108	15	188
821	0.0028019	37	126	16	215
822	0.0028508	5	103	19	201
823	0.0030065	7	101	18	195
824	0.0030609	1	105	17	209
825	0.0029272	27	109	19	191
826	0.0027802	5	78	16	151
827	0.0030642	57	130	16	203
828	0.002765	40	125	17	210
829	0.002809	28	108	18	188
830	0.0028935	58	148	18	238
831	0.003151	18	110	19	202
832	0.0026626	3	101	19	199
833	0.003009	20	109	18	198
834	0.0026452	24	109	19	194
835	0.0029289	28	120	19	212
836	0.0025561	17	105	14	193
837	0.0027177	36	113	17	190
838	0.0028421	12	105	18	198
839	0.0031181	4	109	15	214
840	0.0028283	16	114	17	212
841	0.0027674	26	109	18	192
842	0.0027779	41	121	18	201
843	0.0027946	25	108	19	191
844	0.0029033	10	86	13	162
845	0.0029749	6	104	16	202
846	0.002784	27	117	15	207
847	0.0026762	36	119	19	202
848	0.0028809	16	107	19	198
849	0.0029011	16	123	16	230
850	0.0029491	1	106	19	211
851	0.0029437	33	106	15	179
852	0.003076	5	101	18	197
853	0.0028878	74	142	19	210
854	0.0028348	11	103	17	195
855	0.002963	81	146	19	211
856	0.0027622	10	88	15	166
857	0.0029036	6	98	19	190
858	0.0029475	10	109	15	208
859	0.0031515	26	106	15	186
860	0.0030493	15	98	15	181
861	0.0028955	30	115	18	200
862	0.0028151	20	109	19	198
863	0.0029866	4	99	19	194
864	0.002933	17	106	17	195
865	0.0028716	5	94	15	183
866	0.0026568	15	116	19	217
867	0.0026186	27	117	17	207
868	0.0030361	15	115	18	215
869	0.0033969	34	128	18	222
870	0.0028332	93	165	17	237
871	0.0025957	37	115	17	193
872	0.0029074	2	108	18	214
873	0.0027184	2	110	18	218
874	0.0031099	47	112	16	177
875	0.0029031	10	104	18	198
876	0.0026907	38	119	19	200
877	0.0029334	47	117	19	187
878	0.0029797	17	94	15	171
879	0.0028674	1	107	18	213
880	0.0030693	17	113	18	209
881	0.0028898	52	116	18	180
882	0.0026564	3	90	17	177
883	0.0028547	17	98	15	179
884	0.0029176	7	98	17	189
885	0.002694	38	113	16	188
886	0.0027149	61	127	19	193
887	0.0028195	5	94	16	183
888	0.0035111	41	109	19	177
889	0.0028877	7	100	18	193
890	0.0030099	40	114	17	188
891	0.0032052	35	122	14	209
892	0.0029314	4	94	18	184
893	0.0026807	34	116	16	198
894	0.0029676	5	104	18	203
895	0.0030319	46	115	16	184
896	0.0028138	12	107	16	202
897	0.0026595	20	100	16	180
898	0.0030638	12	101	16	190
899	0.0026638	15	109	16	203
900	0.0028982	6	95	16	184
901	0.0028099	3	98	17	193
902	0.0029639	17	112	17	207
903	0.0026733	30	117	18	204
904	0.0026578	16	111	17	206
905	0.0028904	19	108	18	197
906	0.0028872	13	98	19	183
907	0.0031653	20	101	16	182
908	0.0027049	0	81	16	162
909	0.003247	3	92	19	181
910	0.0029059	67	145	18	223
911	0.0026756	10	96	18	182
912	0.0026712	4	122	19	240
913	0.0027859	28	106	17	184
914	0.0029822	9	125	19	241
915	0.0026822	26	99	18	172
916	0.0028318	36	110	17	184
917	0.002949	15	111	17	207
918	0.0028925	15	103	19	191
919	0.0028896	34	127	17	220
920	0.0031632	2	106	16	210
921	0.0031794	42	126	16	210
922	0.002605	11	104	16	197
923	0.0028599	35	100	14	165
924	0.0029599	35	121	18	207
925	0.0028928	2	92	17	182
926	0.0032759	12	96	19	180
927	0.0029057	8	110	17	212
928	0.0030002	15	105	16	195
929	0.0027273	3	80	13	157
930	0.0026482	43	129	17	215
931	0.0026695	5	103	18	201
932	0.0031699	3	95	15	187
933	0.0029566	20	96	17	172
934	0.0026351	19	107	16	195
935	0.0029379	2	103	15	204
936	0.0026895	6	91	18	176
937	0.0032202	18	109	18	200
938	0.003002	34	109	18	184
939	0.0029526	31	108	14	185
940	0.0030865	13	104	16	195
941	0.0026403	5	87	13	169
942	0.0032407	10	104	19	198
943	0.0029939	47	115	16	183
944	0.0029074	5	97	18	189
945	0.0030586	6	104	17	202
946	0.0029691	53	119	17	185
947	0.0028439	22	122	16	222
948	0.0028421	3	87	12	171
949	0.0027662	19	99	19	179
950	0.0030653	11	98	17	185
951	0.0028969	6	105	18	204
952	0.0031701	3	103	17	203
953	0.0030552	20	106	18	192
954	0.0030214	3	93	17	183
955	0.0030749	10	116	19	222
956	0.0028975	10	93	16	176
957	0.0031537	4	101	18	198
958	0.0030617	52	113	19	174
959	0.0028024	29	119	18	209
960	0.0030893	39	125	17	211
961	0.0028818	8	98	18	188
962	0.0029837	19	105	15	191
963	0.0028061	5	87	16	169
964	0.0028545	5	100	17	195
965	0.0027668	39	102	16	165
966	0.0028269	25	106	16	187
967	0.003	19	102	15	185
968	0.0028983	71	135	16	199
969	0.0028451	32	105	15	178
970	0.0029192	3	107	18	211
971	0.0026345	9	107	16	205
972	0.0028569	30	115	19	200
973	0.0027578	28	104	19	180
974	0.0026774	3	109	19	215
975	0.0029373	18	122	16	226
976	0.0029326	43	126	18	209
977	0.0026405	30	111	19	192
978	0.0029405	16	97	19	178
979	0.0029076	37	116	19	195
980	0.0031229	4	101	17	198
981	0.0027904	23	96	19	169
982	0.0029804	3	104	16	205
983	0.0026641	26	115	17	204
984	0.0030089	37	102	18	167
985	0.002981	51	136	19	221
986	0.0030165	3	98	18	193
987	0.0031998	10	115	16	220
988	0.0025913	31	115	18	199
989	0.0027516	11	101	18	191
990	0.0029094	28	118	17	208
991	0.0029674	11	120	14	229
992	0.0026309	17	113	19	209
993	0.0032492	10	103	18	196
994	0.0028357	30	105	18	180
995	0.002806	17	107	19	197
996	0.0025997	7	101	16	195
997	0.0030023	10	110	17	210
998	0.0028498	8	106	19	204
999	0.0032241	31	140	18	249
mean	0.00288771	20.565	108.163	17.001	195.761

## Sheet: PolyMin_Bal
	time	SEq	Bal	Reg	Egal
0	0.0030272	37	115	17	193
1	0.0029774	6	101	17	196
2	0.0027775	21	94	13	167
3	0.0028204	23	109	17	195
4	0.0027355	1	103	19	205
5	0.0026887	1	102	16	203
6	0.0031454	20	119	19	218
7	0.0025883	8	110	16	212
8	0.0027122	32	117	19	202
9	0.0026261	34	114	17	194
10	0.0027105	80	151	19	222
11	0.0027862	39	129	16	219
12	0.0027607	29	101	18	173
13	0.0030875	14	92	17	170
14	0.0030859	43	120	17	197
15	0.0027642	36	131	18	226
16	0.0027508	75	124	18	173
17	0.002852	4	84	19	164
18	0.0026309	9	105	17	201
19	0.0026969	22	102	17	182
20	0.0029061	19	109	19	199
21	0.0026434	2	109	18	216
22	0.0026778	2	102	17	202
23	0.002836	40	124	18	208
24	0.0030232	54	128	19	202
25	0.0027497	11	113	17	215
26	0.0033217	3	90	18	177
27	0.0029754	25	110	16	195
28	0.002974	8	99	18	190
29	0.0029084	46	129	16	212
30	0.0029402	13	104	16	195
31	0.0027147	23	117	17	211
32	0.0028908	12	107	18	202
33	0.0030367	22	92	14	162
34	0.0027795	18	110	17	202
35	0.0026055	35	94	17	153
36	0.0030746	13	115	16	217
37	0.0028272	36	109	17	182
38	0.0029397	2	102	19	202
39	0.0031016	4	97	18	190
40	0.0029849	24	127	17	230
41	0.0028158	10	91	15	172
42	0.0029611	25	108	15	191
43	0.0026609	61	139	19	217
44	0.0028064	1	108	18	215
45	0.0028361	1	83	15	165
46	0.0028948	24	91	13	158
47	0.0028456	40	115	19	190
48	0.0027664	12	108	16	204
49	0.0029917	2	121	17	240
50	0.0030624	43	116	17	189
51	0.0025922	15	110	18	205
52	0.002852	6	89	13	172
53	0.0031034	11	109	19	207
54	0.0028303	16	108	19	200
55	0.0035346	6	96	15	186
56	0.0032595	18	117	17	216
57	0.0027358	3	115	16	227
58	0.0026958	14	97	16	180
59	0.002924	30	120	18	210
60	0.0026188	49	120	17	191
61	0.0028941	8	116	17	224
62	0.0028473	19	96	19	173
63	0.0028798	14	99	15	184
64	0.0026585	1	112	18	223
65	0.0029521	7	96	19	185
66	0.0028389	9	103	18	197
67	0.0028724	9	94	15	179
68	0.0029563	19	108	14	197
69	0.0028258	14	101	16	188
70	0.002978	7	103	19	199
71	0.0029686	58	132	17	206
72	0.0029901	12	108	18	204
73	0.0029219	16	104	13	192
74	0.0029743	38	106	16	174
75	0.0027216	44	107	17	170
76	0.0030079	6	99	19	192
77	0.0025871	8	85	18	162
78	0.0028043	4	97	19	190
79	0.0028419	44	116	17	188
80	0.0030946	4	90	15	176
81	0.00289	29	104	17	179
82	0.0031705	48	114	16	180
83	0.0026711	42	107	14	172
84	0.0029108	13	107	15	201
85	0.0026643	1	88	18	175
86	0.0028687	35	115	17	195
87	0.0028422	4	100	18	196
88	0.0030674	10	116	15	222
89	0.003136	55	130	17	205
90	0.0033819	55	121	18	187
91	0.0028172	16	107	15	198
92	0.0028533	31	108	18	185
93	0.0027921	17	105	18	193
94	0.0029092	2	99	19	196
95	0.0026225	9	88	14	167
96	0.0029294	21	110	16	199
97	0.00302	21	116	17	211
98	0.0029545	3	94	13	185
99	0.0025927	15	95	13	175
100	0.0026507	28	107	19	186
101	0.002764	7	101	19	195
102	0.0026436	1	94	19	187
103	0.0032456	10	107	19	204
104	0.0029553	20	99	16	178
105	0.0028341	43	112	17	181
106	0.0026028	27	109	19	191
107	0.0030399	49	114	17	179
108	0.0025753	34	111	19	188
109	0.0030193	28	106	18	184
110	0.0025709	16	104	15	192
111	0.0029164	34	109	19	184
112	0.002619	21	101	18	181
113	0.0026633	59	131	18	203
114	0.00269	16	111	17	206
115	0.0030309	3	103	19	203
116	0.0027119	43	132	17	221
117	0.0028582	8	99	19	190
118	0.0028106	18	112	15	206
119	0.0028468	16	101	16	186
120	0.002912	14	91	17	168
121	0.0029869	17	116	17	215
122	0.0027903	31	96	18	161
123	0.0028356	3	106	17	209
124	0.0029702	14	111	14	208
125	0.0025776	62	128	15	194
126	0.002982	17	112	19	207
127	0.0032881	30	117	15	204
128	0.0025733	22	112	17	202
129	0.003194	3	116	16	229
130	0.0029051	13	112	15	211
131	0.0025823	56	125	16	194
132	0.0028557	12	95	17	178
133	0.0029171	1	116	16	231
134	0.0028989	44	121	14	198
135	0.0026619	41	115	15	189
136	0.0027408	10	112	19	214
137	0.0029041	1	106	18	211
138	0.0027716	20	111	18	202
139	0.002899	19	113	15	207
140	0.0031672	6	107	16	208
141	0.0028812	40	132	18	224
142	0.0026792	32	117	18	202
143	0.0029549	1	105	18	209
144	0.0028753	26	87	17	148
145	0.0028658	6	109	19	212
146	0.0026139	5	94	17	183
147	0.0031155	30	111	16	192
148	0.0029136	39	109	17	179
149	0.0030762	15	93	18	171
150	0.0031546	16	121	17	226
151	0.0036575	17	110	19	203
152	0.0026465	25	105	19	185
153	0.0029923	6	98	15	190
154	0.0028409	7	106	19	205
155	0.0028572	9	101	18	193
156	0.0029131	2	96	18	190
157	0.002815	5	101	18	197
158	0.0029324	4	92	17	180
159	0.0029405	3	98	18	193
160	0.0026316	18	100	15	182
161	0.002914	0	95	18	190
162	0.00262	12	93	13	174
163	0.0027247	16	100	15	184
164	0.0030267	9	107	19	205
165	0.0026085	7	100	15	193
166	0.0028954	1	111	13	221
167	0.0029607	38	128	16	218
168	0.0029205	5	78	16	151
169	0.0031121	22	108	15	194
170	0.0026981	13	87	15	161
171	0.0029017	8	99	19	190
172	0.0030864	42	122	16	202
173	0.0029577	12	105	15	198
174	0.0029446	3	90	18	177
175	0.0030402	4	94	17	184
176	0.0030708	25	109	17	193
177	0.002768	42	119	18	196
178	0.002856	5	87	15	169
179	0.0031695	24	117	16	210
180	0.0026526	24	121	17	218
181	0.0028194	7	97	17	187
182	0.0026266	36	116	18	196
183	0.002759	9	99	19	189
184	0.0029109	5	108	18	211
185	0.0028593	11	89	17	167
186	0.0030461	23	106	17	189
187	0.0026106	14	113	17	212
188	0.0029326	22	122	18	222
189	0.0027123	18	104	15	190
190	0.0026253	2	101	17	200
191	0.0029536	2	115	16	228
192	0.0029056	1	100	15	199
193	0.0029696	9	117	19	225
194	0.0026035	15	121	17	227
195	0.0028246	37	112	18	187
196	0.0027087	14	114	18	214
197	0.0025959	29	102	13	175
198	0.0029251	8	96	18	184
199	0.0027407	32	121	19	210
200	0.0027918	31	122	19	213
201	0.0029987	33	107	18	181
202	0.0026876	25	105	16	185
203	0.0029819	42	109	17	176
204	0.0029979	5	102	18	199
205	0.0029435	6	109	19	212
206	0.0029329	4	100	16	196
207	0.0028387	10	116	17	222
208	0.0029826	2	107	16	212
209	0.0028078	31	106	19	181
210	0.0027403	1	101	16	201
211	0.0028769	21	104	16	187
212	0.0027343	3	100	15	197
213	0.0030301	5	84	14	163
214	0.0028357	14	111	19	208
215	0.0028172	26	104	17	182
216	0.0026475	12	110	18	208
217	0.0027411	24	113	19	202
218	0.0029718	22	107	18	192
219	0.0029122	28	99	15	170
220	0.0029556	7	103	17	199
221	0.0026685	33	119	18	205
222	0.0027315	24	99	18	174
223	0.0030493	10	95	17	180
224	0.0028557	17	108	19	199
225	0.0029091	41	110	14	179
226	0.0031571	24	122	16	220
227	0.0030623	4	113	16	222
228	0.0026103	37	113	16	189
229	0.0028902	3	93	15	183
230	0.0027108	35	110	16	185
231	0.002889	3	87	18	171
232	0.0025717	17	108	18	199
233	0.0028342	52	112	15	172
234	0.0030894	40	119	17	198
235	0.0027032	9	99	19	189
236	0.0029654	40	126	19	212
237	0.0028349	14	106	19	198
238	0.0029859	10	94	17	178
239	0.0029244	19	99	15	179
240	0.0027842	0	94	18	188
241	0.0026544	9	105	19	201
242	0.0026142	11	85	17	159
243	0.0025876	25	109	16	193
244	0.0028148	15	107	18	199
245	0.0026095	36	108	17	180
246	0.0033335	5	77	17	149
247	0.0025871	4	111	18	218
248	0.0029746	14	91	18	168
249	0.002558	56	126	15	196
250	0.0027913	6	104	16	202
251	0.0028261	67	138	17	209
252	0.0029061	23	108	17	193
253	0.0034685	37	106	18	175
254	0.0030701	3	107	14	211
255	0.0028369	14	110	17	206
256	0.0028089	0	109	18	218
257	0.0030146	11	98	14	185
258	0.0026476	19	104	18	189
259	0.0026271	16	94	17	172
260	0.0027942	16	107	16	198
261	0.0029903	5	112	17	219
262	0.0028623	41	123	19	205
263	0.0026539	14	117	18	220
264	0.0029928	15	105	14	195
265	0.0028441	24	125	19	226
266	0.0028634	9	117	17	225
267	0.0026455	24	98	18	172
268	0.0029831	57	125	18	193
269	0.0028756	35	107	16	179
270	0.0029284	16	101	18	186
271	0.0028614	12	99	14	186
272	0.0029224	72	128	17	184
273	0.0027116	15	110	19	205
274	0.0027778	17	114	17	211
275	0.0030384	21	88	13	155
276	0.0031823	4	109	17	214
277	0.0025811	27	102	19	177
278	0.0028741	30	116	19	202
279	0.0031202	29	104	16	179
280	0.0027202	13	100	15	187
281	0.003065	26	109	17	192
282	0.0026744	15	107	17	199
283	0.0026629	43	111	12	179
284	0.0026875	22	100	16	178
285	0.0027386	27	107	16	187
286	0.0028859	36	118	16	200
287	0.0029174	6	90	19	174
288	0.0029179	8	112	15	216
289	0.0034097	39	118	19	197
290	0.0027717	4	83	14	162
291	0.0028753	10	106	18	202
292	0.0032104	3	96	19	189
293	0.0029213	9	89	19	169
294	0.0027318	69	136	19	203
295	0.0029747	4	105	19	206
296	0.0026589	14	108	19	202
297	0.0030161	20	101	18	182
298	0.0027275	14	96	19	178
299	0.0028682	33	109	17	185
300	0.0026029	13	114	17	215
301	0.0027694	59	125	16	191
302	0.0030005	16	107	16	198
303	0.0025563	2	94	17	186
304	0.002947	28	102	19	176
305	0.0026191	4	80	15	156
306	0.0030006	0	96	19	192
307	0.0026164	17	108	18	199
308	0.0026786	9	103	19	197
309	0.0029673	0	93	18	186
310	0.0028791	3	83	19	163
311	0.0027156	18	109	18	200
312	0.0029733	39	114	19	189
313	0.0034897	3	113	16	223
314	0.002973	2	90	17	178
315	0.004188	12	107	15	202
316	0.0027636	25	103	14	181
317	0.0028716	16	100	18	184
318	0.0027373	2	90	19	178
319	0.0027868	1	103	17	205
320	0.0028782	23	103	15	183
321	0.0026397	32	108	18	184
322	0.0031077	73	138	18	203
323	0.0027202	6	84	17	162
324	0.0030589	6	97	16	188
325	0.0029043	24	104	13	184
326	0.0028753	6	96	18	186
327	0.0028412	20	119	17	218
328	0.0029259	54	127	19	200
329	0.0029089	48	116	18	184
330	0.0027266	4	97	19	190
331	0.0029933	1	90	15	179
332	0.0028826	27	104	15	181
333	0.0027644	14	106	18	198
334	0.0026732	64	126	18	188
335	0.0029953	32	123	18	214
336	0.0035057	42	124	19	206
337	0.002615	31	131	17	231
338	0.0030487	15	103	17	191
339	0.0029289	29	125	17	221
340	0.0031118	21	110	16	199
341	0.0028702	39	109	18	179
342	0.0028832	5	97	15	189
343	0.0027263	3	104	19	205
344	0.0030885	14	100	17	186
345	0.0028754	66	122	19	178
346	0.0029502	4	85	15	166
347	0.00277	9	102	18	195
348	0.0029646	11	108	17	205
349	0.0031588	21	109	18	197
350	0.0029435	42	126	16	210
351	0.0026287	66	123	18	180
352	0.0026961	3	101	18	199
353	0.0026848	50	136	19	222
354	0.0026666	29	101	18	173
355	0.0025949	40	123	18	206
356	0.0030441	4	104	17	204
357	0.0029674	4	84	15	164
358	0.0029557	48	104	18	160
359	0.00272	36	121	17	206
360	0.0027059	65	131	18	197
361	0.0028113	1	85	15	169
362	0.0026343	32	121	19	210
363	0.002838	8	90	13	172
364	0.0028937	60	125	18	190
365	0.003025	8	105	19	202
366	0.0027822	23	123	19	223
367	0.0029751	10	109	14	208
368	0.0027076	7	82	18	157
369	0.0029399	14	95	19	176
370	0.0028842	22	100	15	178
371	0.0027731	6	110	17	214
372	0.0028891	22	105	18	188
373	0.003348	14	94	19	174
374	0.002908	3	87	17	171
375	0.0027544	16	97	17	178
376	0.0028179	23	107	19	191
377	0.0029479	31	95	15	159
378	0.0028553	24	102	18	180
379	0.0029781	11	113	17	215
380	0.0029876	4	99	17	194
381	0.0025971	15	115	19	215
382	0.002658	5	110	19	215
383	0.0028378	22	111	18	200
384	0.0026853	35	110	15	185
385	0.0028992	10	112	17	214
386	0.0027946	25	107	18	189
387	0.0029355	45	132	18	219
388	0.0029823	35	118	19	201
389	0.0029023	37	117	12	197
390	0.0029197	1	105	15	209
391	0.0027493	6	129	19	252
392	0.0029722	5	115	19	225
393	0.0028915	1	104	19	207
394	0.0026428	20	102	18	184
395	0.0030323	39	113	18	187
396	0.00279	61	135	17	209
397	0.002828	4	90	17	176
398	0.002975	21	108	16	195
399	0.0026353	83	150	17	217
400	0.0030182	14	101	18	188
401	0.0029241	1	105	18	209
402	0.0029755	4	81	18	158
403	0.0028367	8	109	17	210
404	0.0027799	33	120	19	207
405	0.0028332	22	101	18	180
406	0.0029856	13	124	18	235
407	0.0025157	0	95	15	190
408	0.0029942	2	100	16	198
409	0.0028668	22	108	18	194
410	0.0030001	23	122	17	221
411	0.0026555	17	98	17	179
412	0.002776	4	97	17	190
413	0.0025246	28	123	19	218
414	0.0028844	29	95	16	161
415	0.0029668	6	105	17	204
416	0.0030911	8	98	15	188
417	0.0026701	57	134	19	211
418	0.0029979	16	100	16	184
419	0.0029017	12	97	17	182
420	0.0025072	28	121	18	214
421	0.0027499	2	98	17	194
422	0.0029253	1	92	16	183
423	0.0029168	10	96	13	182
424	0.002706	19	113	19	207
425	0.0033028	55	130	19	205
426	0.0027061	21	99	19	177
427	0.002871	4	84	15	164
428	0.003158	47	121	16	195
429	0.0028844	58	129	19	200
430	0.0026649	17	117	18	217
431	0.0031207	11	115	15	219
432	0.0029472	28	110	15	192
433	0.0026374	4	105	17	206
434	0.0030677	46	116	18	186
435	0.0026013	2	90	18	178
436	0.0030006	22	130	19	238
437	0.0028739	1	91	16	181
438	0.0027201	47	126	15	205
439	0.0027313	13	108	17	203
440	0.0029439	4	102	16	200
441	0.0030551	8	98	17	188
442	0.0031405	33	119	18	205
443	0.0029112	10	110	19	210
444	0.003159	7	111	18	215
445	0.0029477	92	147	18	202
446	0.0027248	21	111	18	201
447	0.002614	3	96	16	189
448	0.0029421	25	109	19	193
449	0.0029358	10	102	19	194
450	0.0027274	8	104	19	200
451	0.0026613	22	100	15	178
452	0.0028475	5	91	15	177
453	0.00323	38	121	17	204
454	0.0026352	22	108	19	194
455	0.0028716	3	91	19	179
456	0.0026912	26	119	19	212
457	0.0028776	39	123	16	207
458	0.0028118	12	93	19	174
459	0.0029585	88	157	18	226
460	0.0031338	19	119	18	219
461	0.0029914	4	111	18	218
462	0.0026693	5	108	15	211
463	0.0030516	2	108	16	214
464	0.0026366	14	110	16	206
465	0.002669	8	115	19	222
466	0.0027802	7	93	17	179
467	0.0025412	17	92	15	167
468	0.003059	34	116	17	198
469	0.0029881	30	114	15	198
470	0.0026218	35	114	16	193
471	0.0028118	19	111	18	203
472	0.0025949	21	102	19	183
473	0.0028889	40	122	17	204
474	0.0027442	2	109	18	216
475	0.0029714	16	104	17	192
476	0.0030054	2	77	12	152
477	0.0029266	31	122	16	213
478	0.0029552	2	91	14	180
479	0.0028259	31	108	14	185
480	0.0030636	12	100	16	188
481	0.002756	66	128	17	190
482	0.0031142	14	108	16	202
483	0.0032645	9	110	19	211
484	0.0027548	22	96	18	170
485	0.0028707	3	89	19	175
486	0.0030709	8	116	19	224
487	0.0028707	35	126	16	217
488	0.0025967	2	95	19	188
489	0.003205	61	134	16	207
490	0.0031043	2	107	17	212
491	0.003074	15	106	16	197
492	0.0029771	15	113	18	211
493	0.0029126	54	121	16	188
494	0.0029495	25	107	16	189
495	0.0029771	9	110	17	211
496	0.0029625	8	107	17	206
497	0.0029399	26	102	18	178
498	0.0031245	25	100	14	175
499	0.00271	4	106	18	208
500	0.0029365	10	95	16	180
501	0.0026239	27	109	15	191
502	0.0030885	29	111	18	193
503	0.0029266	3	102	14	201
504	0.0027029	6	102	15	198
505	0.0026231	37	126	19	215
506	0.0035486	11	113	14	215
507	0.0030294	52	138	18	224
508	0.0028567	9	89	17	169
509	0.0027692	8	106	17	204
510	0.0026263	12	113	19	214
511	0.002689	1	88	16	175
512	0.0027417	20	111	19	202
513	0.0030374	7	98	19	189
514	0.0029804	9	99	14	189
515	0.0031931	6	95	14	184
516	0.0028299	10	109	18	208
517	0.0027324	14	96	18	178
518	0.0027889	33	115	18	197
519	0.0027717	4	91	19	178
520	0.0028475	1	99	19	197
521	0.0027977	18	109	15	200
522	0.0030162	37	113	17	189
523	0.0028375	1	104	17	207
524	0.0027204	14	103	16	192
525	0.0028265	22	101	17	180
526	0.0028671	5	113	16	221
527	0.0028026	2	87	15	172
528	0.0029862	0	87	13	174
529	0.003171	26	105	16	184
530	0.0029147	31	110	17	189
531	0.002917	6	108	18	210
532	0.0027704	48	120	17	192
533	0.0026195	1	80	15	159
534	0.0030646	7	117	16	227
535	0.0025911	51	121	19	191
536	0.0029033	35	117	18	199
537	0.0028449	7	101	19	195
538	0.0029485	2	99	15	196
539	0.0031877	3	99	14	195
540	0.0028327	34	127	17	220
541	0.0029006	5	112	17	219
542	0.0031257	16	103	15	190
543	0.0028483	22	112	18	202
544	0.0027383	16	98	18	180
545	0.003028	12	120	15	228
546	0.002894	8	111	14	214
547	0.0030087	34	105	19	176
548	0.0031151	20	118	15	216
549	0.0026636	15	110	15	205
550	0.0026906	70	137	17	204
551	0.0030912	26	105	17	184
552	0.002938	37	108	16	179
553	0.0027906	8	93	18	178
554	0.0032222	9	102	18	195
555	0.0030353	25	115	15	205
556	0.0032044	12	112	16	212
557	0.003118	16	111	18	206
558	0.0029625	19	111	19	203
559	0.0026421	39	115	17	191
560	0.0031861	61	140	16	219
561	0.0028696	14	97	18	180
562	0.0029184	11	99	18	187
563	0.0028191	18	101	16	184
564	0.003046	1	96	18	191
565	0.0025823	59	131	18	203
566	0.0028077	3	104	18	205
567	0.0029889	61	128	13	195
568	0.0028694	15	101	16	187
569	0.0033739	11	94	18	177
570	0.0028755	32	111	18	190
571	0.0028536	3	89	17	175
572	0.002854	9	109	15	209
573	0.0029489	0	120	17	240
574	0.0029441	10	109	17	208
575	0.002579	21	100	17	179
576	0.0029024	13	107	14	201
577	0.0028318	56	133	17	210
578	0.0027648	16	106	15	196
579	0.0030566	0	114	16	228
580	0.0028492	47	126	19	205
581	0.0028051	1	105	17	209
582	0.0026887	34	123	17	212
583	0.0026862	13	110	19	207
584	0.0033489	35	111	18	187
585	0.0027616	28	107	16	186
586	0.0030547	44	126	16	208
587	0.0029359	4	108	18	212
588	0.0031313	19	108	19	197
589	0.0029	18	102	14	186
590	0.002812	38	109	19	180
591	0.0028785	16	102	14	188
592	0.0029958	2	107	19	212
593	0.0027194	12	118	18	224
594	0.0028369	25	108	18	191
595	0.0030183	60	129	16	198
596	0.0028868	16	111	17	206
597	0.0031111	6	111	18	216
598	0.0028092	72	123	17	174
599	0.0029266	41	114	14	187
600	0.0027244	36	109	19	182
601	0.0029347	49	114	17	179
602	0.0026096	15	104	19	193
603	0.0029159	14	102	15	190
604	0.0030346	4	104	17	204
605	0.0026834	19	107	18	195
606	0.0027484	62	138	18	214
607	0.0026129	5	113	16	221
608	0.0025641	23	106	17	189
609	0.0029723	33	125	17	217
610	0.0025408	7	100	16	193
611	0.0027542	16	114	18	212
612	0.0028581	3	98	16	193
613	0.0029017	55	135	19	215
614	0.002893	2	93	17	184
615	0.0025607	51	118	18	185
616	0.0030352	35	122	17	209
617	0.0031018	37	117	16	197
618	0.0028601	10	92	14	174
619	0.0027748	16	94	15	172
620	0.0028699	6	107	16	208
621	0.0028202	51	121	15	191
622	0.0029714	12	114	15	216
623	0.0028089	28	118	19	208
624	0.0030699	2	92	15	182
625	0.0032949	7	110	19	213
626	0.0029461	30	115	18	200
627	0.0027257	5	94	17	183
628	0.0027919	33	110	17	187
629	0.0029741	5	106	17	207
630	0.0030639	8	112	16	216
631	0.0028898	1	107	18	213
632	0.0030084	5	108	15	211
633	0.0030252	8	89	15	170
634	0.0026157	2	105	19	208
635	0.0028756	2	96	16	190
636	0.0037694	38	122	19	206
637	0.0030089	17	109	16	201
638	0.0026069	20	92	17	164
639	0.0028454	5	105	19	205
640	0.0028764	12	102	18	192
641	0.0029426	6	104	16	202
642	0.0026159	32	102	19	172
643	0.0030552	44	126	19	208
644	0.0030306	10	106	17	202
645	0.0030397	36	123	19	210
646	0.0028235	2	103	17	204
647	0.002881	32	114	15	196
648	0.0026536	19	91	17	163
649	0.0029148	25	103	14	181
650	0.0029418	32	111	16	190
651	0.0028422	18	114	19	210
652	0.0028172	57	138	18	219
653	0.0026192	30	107	17	184
654	0.0026872	27	103	19	179
655	0.0026118	79	142	18	205
656	0.0029412	9	91	15	173
657	0.0027684	48	111	17	174
658	0.0025757	18	114	17	210
659	0.0027725	4	94	16	184
660	0.0029272	19	102	16	185
661	0.002974	4	106	18	208
662	0.0029804	6	100	15	194
663	0.0028996	11	109	17	207
664	0.0029147	58	138	18	218
665	0.0029847	33	114	17	195
666	0.0029302	6	110	17	214
667	0.0029474	2	88	17	174
668	0.0030882	16	106	13	196
669	0.0029939	21	110	17	199
670	0.0028752	2	90	16	178
671	0.0029893	25	120	16	215
672	0.0027701	20	103	16	186
673	0.0026671	17	113	19	209
674	0.0028667	22	104	15	186
675	0.002937	7	103	16	199
676	0.0029937	26	116	17	206
677	0.0027802	7	95	19	183
678	0.002638	17	116	19	215
679	0.0028207	11	114	19	217
680	0.002876	15	108	16	201
681	0.003359	15	123	17	231
682	0.0028786	41	130	17	219
683	0.0031319	34	120	18	206
684	0.0027376	5	95	16	185
685	0.0027089	31	107	15	183
686	0.0031451	34	110	15	186
687	0.0028653	4	107	18	210
688	0.0028897	19	90	18	161
689	0.0028483	57	117	16	177
690	0.0026299	4	84	17	164
691	0.0030112	11	111	18	211
692	0.0029111	0	92	14	184
693	0.002528	7	104	17	201
694	0.0030586	11	100	15	189
695	0.0026952	28	114	17	200
696	0.0034793	22	102	19	182
697	0.0027854	64	138	17	212
698	0.0025996	37	121	19	205
699	0.0027834	3	87	15	171
700	0.0026551	21	105	17	189
701	0.0027889	0	107	17	214
702	0.0027258	13	103	19	193
703	0.0028964	24	107	19	190
704	0.0028044	19	96	19	173
705	0.0027423	46	124	17	202
706	0.0027936	86	156	17	226
707	0.0025899	5	100	17	195
708	0.002683	21	107	16	193
709	0.0027682	14	105	18	196
710	0.0027961	22	96	15	170
711	0.0031184	6	97	17	188
712	0.0028529	9	96	15	183
713	0.0029747	29	115	16	201
714	0.0027675	41	127	17	213
715	0.0029805	3	106	16	209
716	0.0031592	1	103	15	205
717	0.0030368	18	100	18	182
718	0.0026348	1	94	15	187
719	0.0029558	18	103	18	188
720	0.0031221	22	120	14	218
721	0.0030945	12	110	16	208
722	0.0029165	19	104	17	189
723	0.002961	27	120	18	213
724	0.0027622	41	105	17	169
725	0.0029459	31	119	17	207
726	0.0027295	18	108	17	198
727	0.0026872	21	91	17	161
728	0.0028853	24	111	16	198
729	0.0029412	42	112	15	182
730	0.0029347	8	80	19	152
731	0.003252	29	122	19	215
732	0.0025874	13	121	19	229
733	0.0027296	12	99	19	186
734	0.0026213	38	111	19	184
735	0.0028722	6	91	19	176
736	0.0029851	51	131	17	211
737	0.0029097	22	104	19	186
738	0.0029019	37	119	17	201
739	0.0025893	4	97	18	190
740	0.0029283	43	121	19	199
741	0.0029869	11	116	16	221
742	0.0025077	41	129	19	217
743	0.0029238	15	111	15	207
744	0.00298	29	116	16	203
745	0.0030895	44	132	18	220
746	0.0028386	11	94	16	177
747	0.0028319	42	120	16	198
748	0.0029064	64	124	16	184
749	0.0027029	45	125	18	205
750	0.0029625	34	119	17	204
751	0.0025879	4	94	17	184
752	0.0030342	7	101	18	195
753	0.0035467	23	108	16	193
754	0.0030198	15	100	19	185
755	0.0029947	39	112	15	185
756	0.0029252	25	103	19	181
757	0.0027273	34	130	18	226
758	0.00284	9	95	19	181
759	0.0028597	37	121	14	205
760	0.0028497	51	118	17	185
761	0.0029245	2	98	17	194
762	0.0028334	39	110	19	181
763	0.0026803	12	106	16	200
764	0.0026457	11	101	16	191
765	0.0029987	8	104	16	200
766	0.0029421	34	120	17	206
767	0.0028247	38	125	19	212
768	0.0027618	7	111	18	215
769	0.0028311	19	105	18	191
770	0.00301	10	98	15	186
771	0.0029984	13	102	17	191
772	0.0029356	16	100	19	184
773	0.0027577	19	110	19	201
774	0.003038	40	124	17	208
775	0.0027287	26	121	17	216
776	0.0028674	8	102	16	196
777	0.0030536	57	128	17	199
778	0.002674	29	101	17	173
779	0.0028193	27	113	14	199
780	0.0026803	29	104	18	179
781	0.002837	12	82	15	152
782	0.0026158	28	119	16	210
783	0.002934	48	118	18	188
784	0.0028606	16	110	18	204
785	0.0027201	16	102	19	188
786	0.0027045	18	97	14	176
787	0.0028008	13	102	14	191
788	0.0028123	7	97	18	187
789	0.0027611	4	97	17	190
790	0.0030693	2	100	19	198
791	0.0026961	18	108	16	198
792	0.0025819	48	137	18	226
793	0.002674	0	99	19	198
794	0.0028497	1	98	19	195
795	0.0027745	12	106	17	200
796	0.0029632	70	125	14	180
797	0.0030824	6	99	18	192
798	0.0033252	15	104	15	193
799	0.0025501	3	84	16	165
800	0.0026508	1	96	16	191
801	0.0029553	20	103	19	186
802	0.002608	1	88	16	175
803	0.0028388	27	109	18	191
804	0.0028735	13	106	16	199
805	0.0029324	19	101	14	183
806	0.0030478	26	112	17	198
807	0.0030481	3	111	19	219
808	0.0026437	7	100	16	193
809	0.0030691	51	117	19	183
810	0.0030442	2	121	15	240
811	0.0029492	17	109	18	201
812	0.0028139	10	108	19	206
813	0.0029014	32	115	14	198
814	0.0027384	18	119	19	220
815	0.0031841	49	137	16	225
816	0.0029911	10	105	15	200
817	0.0027032	6	93	18	180
818	0.00285	12	110	16	208
819	0.003024	45	112	14	179
820	0.0026275	28	108	15	188
821	0.0026469	37	126	16	215
822	0.0028762	5	103	19	201
823	0.002976	7	101	18	195
824	0.0030149	1	105	17	209
825	0.0030811	27	109	19	191
826	0.0029358	5	78	16	151
827	0.0029788	61	127	18	193
828	0.0025592	40	125	17	210
829	0.002858	28	108	18	188
830	0.0030424	58	148	18	238
831	0.0032191	18	110	19	202
832	0.0026998	3	101	19	199
833	0.0027839	20	109	18	198
834	0.0026081	24	109	19	194
835	0.0031987	28	120	19	212
836	0.0027494	17	105	14	193
837	0.0027512	36	113	17	190
838	0.0027704	12	105	18	198
839	0.0031055	4	109	15	214
840	0.0027633	16	114	17	212
841	0.0027479	26	109	18	192
842	0.0029712	50	108	19	166
843	0.0028696	25	108	19	191
844	0.0030998	10	86	13	162
845	0.0032055	6	104	16	202
846	0.0028098	27	117	15	207
847	0.0026298	36	119	19	202
848	0.0027716	16	107	19	198
849	0.0028913	16	123	16	230
850	0.0029012	1	106	19	211
851	0.0029256	33	106	15	179
852	0.0030462	5	101	18	197
853	0.0028427	74	142	19	210
854	0.0028853	11	103	17	195
855	0.0029657	81	146	19	211
856	0.0027775	10	88	15	166
857	0.0029465	6	98	19	190
858	0.0031134	10	109	15	208
859	0.0031999	26	106	15	186
860	0.0032046	15	98	15	181
861	0.002617	30	115	18	200
862	0.0027753	20	109	19	198
863	0.0029156	4	99	19	194
864	0.0028403	17	106	17	195
865	0.0031113	5	94	15	183
866	0.0025853	15	116	19	217
867	0.0026605	27	117	17	207
868	0.0029136	15	115	18	215
869	0.0030547	34	128	18	222
870	0.0027483	93	165	17	237
871	0.0026771	37	115	17	193
872	0.0029491	2	108	18	214
873	0.0029549	2	110	18	218
874	0.0031109	47	112	16	177
875	0.0028269	10	104	18	198
876	0.002736	38	119	19	200
877	0.0029864	47	117	19	187
878	0.0030163	17	94	15	171
879	0.0030105	1	107	18	213
880	0.0029061	17	113	18	209
881	0.0035056	52	116	18	180
882	0.0025527	3	90	17	177
883	0.0029792	17	98	15	179
884	0.0028732	7	98	17	189
885	0.0026645	38	113	16	188
886	0.0027169	61	127	19	193
887	0.0031562	5	94	16	183
888	0.0031702	41	109	19	177
889	0.002887	7	100	18	193
890	0.0030819	40	114	17	188
891	0.0031536	35	122	14	209
892	0.002946	4	94	18	184
893	0.0026633	34	116	16	198
894	0.002847	5	104	18	203
895	0.0029031	46	115	16	184
896	0.0028373	12	107	16	202
897	0.0026041	20	100	16	180
898	0.0029306	12	101	16	190
899	0.0026921	15	109	16	203
900	0.002895	6	95	16	184
901	0.0028451	3	98	17	193
902	0.0028059	17	112	17	207
903	0.0027332	30	117	18	204
904	0.0026327	16	111	17	206
905	0.0030869	19	108	18	197
906	0.0030356	13	98	19	183
907	0.0030213	20	101	16	182
908	0.0026552	0	81	16	162
909	0.0030941	3	92	19	181
910	0.0029461	67	145	18	223
911	0.0026592	10	96	18	182
912	0.0028185	4	122	19	240
913	0.0028956	28	106	17	184
914	0.0028709	9	125	19	241
915	0.0027667	26	99	18	172
916	0.0028131	36	110	17	184
917	0.003131	15	111	17	207
918	0.0027153	15	103	19	191
919	0.0030816	34	127	17	220
920	0.002882	2	106	16	210
921	0.0029361	42	126	16	210
922	0.0027823	11	104	16	197
923	0.0029543	35	100	14	165
924	0.0028913	35	119	19	203
925	0.0033226	2	92	17	182
926	0.0034101	12	96	19	180
927	0.0033288	8	110	17	212
928	0.0031229	15	105	16	195
929	0.0025995	3	80	13	157
930	0.0027115	43	129	17	215
931	0.0026526	5	103	18	201
932	0.0030524	3	95	15	187
933	0.0028943	20	96	17	172
934	0.0026502	19	107	16	195
935	0.0031739	2	103	15	204
936	0.0026811	6	91	18	176
937	0.0028648	18	109	18	200
938	0.0027759	34	109	18	184
939	0.003081	31	108	14	185
940	0.0032724	21	103	18	185
941	0.0026078	5	87	13	169
942	0.002779	10	104	19	198
943	0.0029241	47	115	16	183
944	0.0028058	5	97	18	189
945	0.0028864	6	104	17	202
946	0.0028465	53	119	17	185
947	0.0028541	22	122	16	222
948	0.0029301	3	87	12	171
949	0.0028119	19	99	19	179
950	0.0028449	11	98	17	185
951	0.0029587	6	105	18	204
952	0.0027967	3	103	17	203
953	0.0029823	24	102	19	180
954	0.0028404	3	93	17	183
955	0.002882	10	116	19	222
956	0.0030345	10	93	16	176
957	0.0032308	4	101	18	198
958	0.0031077	52	113	19	174
959	0.0027161	29	119	18	209
960	0.002969	39	125	17	211
961	0.0030159	8	98	18	188
962	0.0029276	19	105	15	191
963	0.0030544	5	87	16	169
964	0.0029698	5	100	17	195
965	0.002537	39	102	16	165
966	0.0036087	25	106	16	187
967	0.003003	19	102	15	185
968	0.0027437	71	135	16	199
969	0.0029035	32	105	15	178
970	0.0028275	3	107	18	211
971	0.0028627	9	107	16	205
972	0.0029448	30	115	19	200
973	0.0027253	28	104	19	180
974	0.0026844	3	109	19	215
975	0.0029178	18	122	16	226
976	0.0029071	49	123	19	197
977	0.0027124	30	111	19	192
978	0.0028458	16	97	19	178
979	0.0029884	37	116	19	195
980	0.0031466	4	101	17	198
981	0.002804	25	95	19	165
982	0.0029484	3	104	16	205
983	0.00287	26	115	17	204
984	0.0028501	37	102	18	167
985	0.0028489	51	136	19	221
986	0.0030463	3	98	18	193
987	0.0031973	10	115	16	220
988	0.002739	31	115	18	199
989	0.0026593	11	101	18	191
990	0.0029564	28	118	17	208
991	0.0029139	11	120	14	229
992	0.0027336	17	113	19	209
993	0.0028695	10	103	18	196
994	0.0028853	30	105	18	180
995	0.0027707	17	107	19	197
996	0.0026653	7	101	16	195
997	0.0029576	10	110	17	210
998	0.0029149	8	106	19	204
999	0.0031868	31	140	18	249
mean	0.00287876	20.732	108.038	17.025	195.344

## Sheet: DACC_D
	time	SEq	Bal	Reg	Egal
0	0.0005417	4	94	17	184
1	0.0006105	18	109	16	200
2	0.000577	21	94	13	167
3	0.0006245	7	109	19	211
4	0.0005644	12	109	19	206
5	0.0005724	1	102	16	203
6	0.0005849	4	115	19	226
7	0.0005683	8	110	16	212
8	0.0005061	32	117	19	202
9	0.0005516	34	114	17	194
10	0.0008965	80	151	19	222
11	0.0006494	39	129	16	219
12	0.000592	29	101	18	173
13	0.000608	14	92	17	170
14	0.0006778	14	107	17	200
15	0.000643	36	131	18	226
16	0.000696	75	124	18	173
17	0.0005965	25	99	19	173
18	0.0005619	9	105	17	201
19	0.0005858	22	102	17	182
20	0.0007745	47	114	19	181
21	0.0005102	2	109	18	216
22	0.0005853	2	102	17	202
23	0.0006034	40	124	18	208
24	0.0006995	27	119	19	211
25	0.0006407	11	113	17	215
26	0.0006225	3	90	18	177
27	0.0005851	25	110	16	195
28	0.0005554	8	99	18	190
29	0.0006753	20	125	18	230
30	0.0006161	7	104	19	201
31	0.0006093	23	117	17	211
32	0.0006402	12	107	18	202
33	0.0005357	22	92	14	162
34	0.00061	18	110	17	202
35	0.0005825	35	94	17	153
36	0.0007678	13	115	16	217
37	0.0005831	20	106	18	192
38	0.0005883	14	111	18	208
39	0.0005493	15	105	18	195
40	0.0007424	15	125	19	235
41	0.0005676	28	103	16	178
42	0.0006546	25	108	15	191
43	0.0006492	61	139	19	217
44	0.0006615	21	112	18	203
45	0.000524	1	83	15	165
46	0.000526	24	91	13	158
47	0.0005955	18	111	19	204
48	0.0005917	12	108	16	204
49	0.0007042	2	121	17	240
50	0.0005953	54	122	18	190
51	0.0005958	15	110	18	205
52	0.0005118	6	89	13	172
53	0.0005825	11	109	19	207
54	0.0006005	11	103	19	195
55	0.0006058	6	96	15	186
56	0.0005284	18	117	17	216
57	0.0006643	3	115	16	227
58	0.0005949	14	97	16	180
59	0.0006411	1	109	18	217
60	0.0006884	49	120	17	191
61	0.0006799	8	116	17	224
62	0.0005645	19	96	19	173
63	0.0005275	14	99	15	184
64	0.0005862	1	112	18	223
65	0.0005513	15	99	19	183
66	0.0005669	9	103	18	197
67	0.0006283	10	94	18	178
68	0.0005371	19	108	14	197
69	0.0008217	14	101	16	188
70	0.0006048	14	110	19	206
71	0.0004917	87	143	19	199
72	0.0005266	4	104	18	204
73	0.0005497	16	104	13	192
74	0.0006302	38	106	16	174
75	0.0005902	44	107	17	170
76	0.0006243	6	99	19	192
77	0.0006067	8	85	18	162
78	0.0005819	4	97	19	190
79	0.000618	30	109	17	188
80	0.0005588	4	90	15	176
81	0.0006311	12	96	17	180
82	0.0005881	29	109	17	189
83	0.0005805	42	107	14	172
84	0.0005575	39	116	16	193
85	0.0005852	1	88	18	175
86	0.0006277	35	115	17	195
87	0.0006989	4	100	18	196
88	0.0006105	61	140	17	219
89	0.0005879	55	130	17	205
90	0.0005165	55	121	18	187
91	0.0006231	32	116	18	200
92	0.0006457	31	108	18	185
93	0.0005946	38	117	17	196
94	0.0005311	9	105	19	201
95	0.0005425	9	88	14	167
96	0.0005314	4	105	16	206
97	0.0009223	21	116	17	211
98	0.0005537	22	107	14	192
99	0.0005817	15	95	13	175
100	0.0006021	28	107	19	186
101	0.0006172	7	101	19	195
102	0.0005635	1	94	19	187
103	0.0006097	16	117	17	218
104	0.00055	20	101	16	182
105	0.0005772	38	110	17	182
106	0.0006121	27	109	19	191
107	0.000574	44	112	17	180
108	0.0005556	34	111	19	188
109	0.0005692	27	114	18	201
110	0.000703	16	104	15	192
111	0.0006109	6	100	19	194
112	0.00056	21	101	18	181
113	0.0006467	59	131	18	203
114	0.0006159	16	111	17	206
115	0.0006036	3	103	19	203
116	0.0006386	43	132	17	221
117	0.0006281	20	103	19	186
118	0.0005535	18	112	15	206
119	0.0005291	16	101	16	186
120	0.0004969	14	91	17	168
121	0.0006659	17	116	17	215
122	0.0005578	8	87	19	166
123	0.0005677	34	131	18	228
124	0.0005255	5	108	18	211
125	0.0006304	62	128	15	194
126	0.0005989	17	112	19	207
127	0.0007833	24	124	15	224
128	0.0005917	22	112	17	202
129	0.000618	17	120	17	223
130	0.0006279	48	134	18	220
131	0.0006208	56	125	16	194
132	0.0005122	12	95	17	178
133	0.0006509	31	134	17	237
134	0.0007537	37	118	14	199
135	0.0005259	41	115	15	189
136	0.0006109	10	112	19	214
137	0.0006203	1	106	18	211
138	0.000598	20	111	18	202
139	0.000646	19	113	15	207
140	0.0005823	35	118	18	201
141	0.0006701	40	132	18	224
142	0.000738	32	117	18	202
143	0.0006655	1	105	18	209
144	0.0006045	43	100	17	157
145	0.000601	25	121	19	217
146	0.0005404	5	94	17	183
147	0.0006669	11	109	17	207
148	0.000571	17	109	18	201
149	0.000625	46	110	18	174
150	0.0007125	18	127	18	236
151	0.0008586	7	106	19	205
152	0.0005679	25	105	19	185
153	0.0006119	14	105	19	196
154	0.0006519	7	106	19	205
155	0.0006118	33	117	18	201
156	0.0005774	2	96	18	190
157	0.0005811	16	110	19	204
158	0.0005491	4	92	17	180
159	0.0005706	29	117	16	205
160	0.0005661	18	100	15	182
161	0.0007662	28	117	18	206
162	0.0005031	12	93	13	174
163	0.0006306	35	112	15	189
164	0.000555	9	107	19	205
165	0.0005697	7	100	15	193
166	0.000739	1	111	13	221
167	0.0006417	51	128	17	205
168	0.000502	5	78	16	151
169	0.0005986	14	110	15	206
170	0.0004803	13	87	15	161
171	0.0005753	8	99	19	190
172	0.0006088	30	118	17	206
173	0.000673	29	119	15	209
174	0.00061	76	135	19	194
175	0.0005614	4	94	17	184
176	0.0006224	25	109	17	193
177	0.0005624	42	119	18	196
178	0.0005257	13	90	15	167
179	0.0006465	39	120	19	201
180	0.0006229	24	121	17	218
181	0.0005632	5	96	17	187
182	0.0005512	36	116	18	196
183	0.0007338	9	99	19	189
184	0.0007834	59	132	19	205
185	0.0005736	11	89	17	167
186	0.0006047	37	113	19	189
187	0.0005414	14	113	17	212
188	0.0006121	22	122	18	222
189	0.0005665	18	104	15	190
190	0.0006409	2	101	17	200
191	0.0006446	2	115	16	228
192	0.0005492	1	100	15	199
193	0.0006207	35	124	19	213
194	0.0007308	15	121	17	227
195	0.0006857	37	112	18	187
196	0.0006746	14	114	18	214
197	0.0004965	29	102	13	175
198	0.0006444	21	105	19	189
199	0.0006538	32	121	19	210
200	0.0007065	31	122	19	213
201	0.0006143	33	107	18	181
202	0.0005874	25	105	16	185
203	0.0005322	60	121	18	182
204	0.0006398	62	143	19	224
205	0.000574	35	127	19	219
206	0.0006452	4	100	16	196
207	0.000636	10	116	17	222
208	0.000588	2	107	16	212
209	0.0005315	31	106	19	181
210	0.0005497	1	101	16	201
211	0.0005497	10	106	17	202
212	0.0005839	3	100	15	197
213	0.0004962	5	84	14	163
214	0.0006179	14	111	19	208
215	0.000569	50	120	17	190
216	0.0006313	12	110	18	208
217	0.0006253	24	113	19	202
218	0.0005254	14	105	19	196
219	0.0005044	28	99	15	170
220	0.0005993	27	119	17	211
221	0.0007048	33	119	18	205
222	0.0005908	24	99	18	174
223	0.0006408	41	123	18	205
224	0.0006217	17	108	19	199
225	0.0005379	41	110	14	179
226	0.0006552	11	117	16	223
227	0.0005909	25	120	16	215
228	0.0005267	37	113	16	189
229	0.0006032	3	93	15	183
230	0.0005843	10	99	16	188
231	0.000756	31	107	16	183
232	0.0006335	17	108	18	199
233	0.0005232	52	112	15	172
234	0.0005681	1	100	16	199
235	0.0006115	28	110	19	192
236	0.0006143	56	134	19	212
237	0.0005418	30	117	18	204
238	0.000594	51	118	18	185
239	0.000621	19	99	15	179
240	0.000568	0	94	18	188
241	0.0005357	9	105	19	201
242	0.0005486	11	85	17	159
243	0.0007383	25	109	16	193
244	0.0006201	15	107	18	199
245	0.0005847	36	108	17	180
246	0.0005947	10	83	17	156
247	0.0006042	4	111	18	218
248	0.0005721	24	101	19	178
249	0.000612	56	126	15	196
250	0.00058	31	116	17	201
251	0.0007257	67	138	17	209
252	0.0005421	23	108	17	193
253	0.0004963	46	112	18	178
254	0.0005687	36	118	14	200
255	0.0006045	14	110	17	206
256	0.0005994	0	109	18	218
257	0.0006114	11	98	14	185
258	0.0006377	19	104	18	189
259	0.0005796	16	94	17	172
260	0.0006352	16	107	16	198
261	0.0005881	12	111	19	210
262	0.0005579	24	115	19	206
263	0.0006587	14	117	18	220
264	0.0005247	17	108	19	199
265	0.0005888	42	138	19	234
266	0.0006019	9	117	17	225
267	0.0005689	24	98	18	172
268	0.0006316	1	113	19	225
269	0.0005461	62	125	18	188
270	0.0005826	3	97	18	191
271	0.0005157	29	107	14	185
272	0.0005711	0	92	19	184
273	0.0006867	15	110	19	205
274	0.0006452	17	114	17	211
275	0.0004767	38	98	14	158
276	0.0006333	55	130	19	205
277	0.0005918	27	102	19	177
278	0.0006261	13	110	19	207
279	0.0006147	11	99	17	187
280	0.0005631	11	99	15	187
281	0.0006273	26	109	17	192
282	0.0006315	15	107	17	199
283	0.0005569	43	111	12	179
284	0.0005896	22	100	16	178
285	0.0006005	27	107	16	187
286	0.0005569	39	124	19	209
287	0.0007599	6	90	19	174
288	0.0006617	37	132	18	227
289	0.0005491	29	120	16	211
290	0.000538	4	83	14	162
291	0.0005349	22	113	18	204
292	0.0007524	3	96	19	189
293	0.0006152	9	90	17	171
294	0.0006054	69	136	19	203
295	0.0007198	22	118	16	214
296	0.0005497	14	108	19	202
297	0.0005766	20	101	18	182
298	0.0005823	14	96	19	178
299	0.0006472	33	109	17	185
300	0.0005678	13	114	17	215
301	0.0006443	40	117	18	194
302	0.0005551	16	107	16	198
303	0.000537	2	94	17	186
304	0.000617	28	102	19	176
305	0.0005863	4	80	15	156
306	0.0006138	40	119	18	198
307	0.0005943	17	108	18	199
308	0.0005731	9	103	19	197
309	0.0005131	0	93	18	186
310	0.0005395	27	106	18	185
311	0.0006643	18	109	18	200
312	0.0006214	28	118	19	208
313	0.0006051	14	119	18	224
314	0.0004987	2	90	17	178
315	0.0005996	12	107	15	202
316	0.0006157	33	105	14	177
317	0.0005906	16	100	18	184
318	0.0005557	2	90	19	178
319	0.0006364	1	103	17	205
320	0.0005774	23	103	15	183
321	0.0006654	32	108	18	184
322	0.0006448	2	106	19	210
323	0.000537	24	98	18	172
324	0.0008455	6	97	16	188
325	0.0006362	24	104	13	184
326	0.0005697	6	96	18	186
327	0.0006845	25	113	18	201
328	0.0006336	39	120	19	201
329	0.0006333	48	116	18	184
330	0.0006188	13	104	19	195
331	0.0005717	17	104	18	191
332	0.0006316	27	104	15	181
333	0.0005466	28	109	18	190
334	0.0005826	64	126	18	188
335	0.0005893	32	123	18	214
336	0.0005858	14	114	19	214
337	0.0005832	31	131	17	231
338	0.0006438	15	103	17	191
339	0.0005863	41	135	18	229
340	0.0006012	32	112	17	192
341	0.0006629	1	97	19	193
342	0.0005926	5	97	15	189
343	0.0005997	3	104	19	205
344	0.0006162	14	100	17	186
345	0.0005911	66	122	19	178
346	0.000537	4	85	15	166
347	0.0005923	27	112	18	197
348	0.0005694	47	124	18	201
349	0.0006404	21	109	18	197
350	0.0005692	35	124	16	213
351	0.0006821	66	123	18	180
352	0.0005483	3	101	18	199
353	0.0006303	50	136	19	222
354	0.0005392	29	101	18	173
355	0.0006247	40	123	18	206
356	0.0005836	4	104	17	204
357	0.0005157	9	84	15	159
358	0.0004755	82	123	18	164
359	0.0006183	36	121	17	206
360	0.0005766	65	131	18	197
361	0.0005058	14	93	15	172
362	0.0006418	32	121	19	210
363	0.0005352	8	90	13	172
364	0.0006936	33	113	18	193
365	0.000642	46	126	19	206
366	0.0006594	23	123	19	223
367	0.0006263	10	109	14	208
368	0.0005922	7	82	18	157
369	0.000537	24	106	19	188
370	0.0005575	30	105	15	180
371	0.0006144	6	110	17	214
372	0.0006333	36	113	18	190
373	0.0006374	6	90	19	174
374	0.0004703	3	87	17	171
375	0.0006509	32	109	17	186
376	0.0005804	23	107	19	191
377	0.0004594	54	110	15	166
378	0.0006554	6	94	18	182
379	0.0006364	11	113	17	215
380	0.0006212	4	99	17	194
381	0.0006776	15	115	19	215
382	0.0006838	5	110	19	215
383	0.0005767	22	111	18	200
384	0.0006803	35	110	15	185
385	0.0007152	24	118	17	212
386	0.0005145	16	105	18	194
387	0.0008143	41	130	18	219
388	0.0005847	14	113	19	212
389	0.0006371	37	117	12	197
390	0.0006215	1	105	15	209
391	0.0007045	6	129	19	252
392	0.0006424	5	115	19	225
393	0.0006012	1	104	19	207
394	0.0005801	20	102	18	184
395	0.000534	39	113	18	187
396	0.0007065	61	135	17	209
397	0.0006483	4	90	17	176
398	0.0005772	71	127	19	183
399	0.0006592	83	150	17	217
400	0.0006843	29	115	19	201
401	0.0005766	29	122	19	215
402	0.000505	4	81	18	158
403	0.0005987	6	108	17	210
404	0.0006166	33	120	19	207
405	0.0006701	13	98	18	183
406	0.0005932	33	131	19	229
407	0.0005643	0	95	15	190
408	0.0005893	2	100	16	198
409	0.0006088	16	105	18	194
410	0.0006269	2	116	17	230
411	0.000559	17	98	17	179
412	0.0005302	4	97	17	190
413	0.0006342	28	123	19	218
414	0.0006477	15	97	16	179
415	0.0006376	6	105	17	204
416	0.0005404	8	98	15	188
417	0.0006248	57	134	19	211
418	0.000504	49	119	19	189
419	0.0005742	17	100	17	183
420	0.0006531	28	121	18	214
421	0.0005794	23	102	19	181
422	0.0005922	41	107	16	173
423	0.0005665	55	115	18	175
424	0.000631	19	113	19	207
425	0.0007407	40	130	16	220
426	0.0005876	21	99	19	177
427	0.0006365	12	90	18	168
428	0.0006104	47	121	16	195
429	0.0006629	58	129	19	200
430	0.0006148	17	117	18	217
431	0.0005327	11	115	15	219
432	0.000607	28	110	15	192
433	0.0005949	4	105	17	206
434	0.0006119	16	110	17	204
435	0.0005661	2	90	18	178
436	0.0006445	5	125	19	245
437	0.0006429	1	91	16	181
438	0.0006545	47	126	15	205
439	0.0007676	13	108	17	203
440	0.0005806	18	109	16	200
441	0.0005558	8	98	17	188
442	0.0005706	15	111	18	207
443	0.0005979	10	110	19	210
444	0.0006448	7	111	18	215
445	0.0006856	44	127	18	210
446	0.0005388	21	111	18	201
447	0.0005505	3	96	16	189
448	0.0005553	25	109	19	193
449	0.0005775	62	129	19	196
450	0.0005974	30	114	19	198
451	0.0005524	22	100	15	178
452	0.000609	17	100	15	183
453	0.0006436	21	118	19	215
454	0.000604	22	108	19	194
455	0.0005819	29	116	18	203
456	0.0006638	26	119	19	212
457	0.0004779	97	149	18	201
458	0.0004989	34	107	19	180
459	0.0006798	59	145	18	231
460	0.0006656	4	112	18	220
461	0.0006447	11	112	18	213
462	0.0006211	5	108	15	211
463	0.0005457	2	108	16	214
464	0.0006069	14	110	16	206
465	0.0005875	8	115	19	222
466	0.0005028	7	93	17	179
467	0.0006031	17	92	15	167
468	0.000621	34	116	17	198
469	0.0005502	68	135	16	202
470	0.0006832	35	114	16	193
471	0.0005721	37	122	18	207
472	0.0005972	21	102	19	183
473	0.0006706	75	146	17	217
474	0.0006175	2	109	18	216
475	0.0006857	16	104	17	192
476	0.0005618	2	77	12	152
477	0.0006087	31	122	16	213
478	0.0005822	2	91	14	180
479	0.0006301	12	103	14	194
480	0.0006018	12	100	16	188
481	0.0006781	49	120	17	191
482	0.0005847	14	108	16	202
483	0.0005635	8	113	18	218
484	0.0006311	22	96	18	170
485	0.0005021	14	93	19	172
486	0.0007169	25	125	18	225
487	0.0005323	73	153	18	233
488	0.0006347	2	95	19	188
489	0.0005649	36	129	19	222
490	0.0007691	18	117	17	216
491	0.0006167	0	102	18	204
492	0.000618	46	135	18	224
493	0.0005958	85	144	17	203
494	0.0005506	4	99	18	194
495	0.0005466	32	129	19	226
496	0.0006201	8	107	17	206
497	0.0005543	10	98	18	186
498	0.000529	3	93	14	183
499	0.0006116	4	106	18	208
500	0.0005407	10	95	16	180
501	0.000598	27	109	15	191
502	0.000565	29	111	18	193
503	0.0005457	3	102	14	201
504	0.0006015	6	102	15	198
505	0.0006355	37	126	19	215
506	0.0006291	11	113	14	215
507	0.0006685	29	127	19	225
508	0.0005362	9	89	17	169
509	0.0006217	8	106	17	204
510	0.0007778	12	113	19	214
511	0.0005675	1	88	16	175
512	0.0006164	34	118	19	202
513	0.0005632	23	107	17	191
514	0.0005794	44	118	17	192
515	0.0005494	6	95	14	184
516	0.0006328	33	114	18	195
517	0.0005623	14	96	18	178
518	0.0006276	47	124	18	201
519	0.0004945	25	100	19	175
520	0.0006723	27	117	19	207
521	0.0006425	18	109	15	200
522	0.0005276	37	113	17	189
523	0.0006183	10	107	17	204
524	0.0006408	14	103	16	192
525	0.0005857	27	103	17	179
526	0.0005594	55	142	19	229
527	0.0005101	2	87	15	172
528	0.0005723	0	87	13	174
529	0.0004956	26	105	16	184
530	0.0005298	56	123	18	190
531	0.0005717	6	108	18	210
532	0.0006821	48	120	17	192
533	0.0005383	1	80	15	159
534	0.0006062	17	118	17	219
535	0.0004867	51	121	19	191
536	0.0005745	46	123	18	200
537	0.0005491	7	101	19	195
538	0.0005937	19	110	15	201
539	0.000556	17	107	15	197
540	0.0006983	34	127	17	220
541	0.0005512	5	112	17	219
542	0.0005372	16	103	15	190
543	0.0005789	22	112	18	202
544	0.000544	16	98	18	180
545	0.0006441	22	125	15	228
546	0.0006096	20	119	17	218
547	0.0005994	34	105	19	176
548	0.0005987	1	107	15	213
549	0.0005669	15	110	15	205
550	0.0006117	70	137	17	204
551	0.0005621	26	105	17	184
552	0.0005714	14	110	19	206
553	0.0005417	3	91	18	179
554	0.0006573	9	102	18	195
555	0.0005798	25	115	15	205
556	0.0006869	12	112	16	212
557	0.0006019	16	111	18	206
558	0.0006603	28	121	17	214
559	0.0006202	39	115	17	191
560	0.0006445	61	140	16	219
561	0.000572	14	97	18	180
562	0.0005437	11	99	18	187
563	0.000567	1	99	16	197
564	0.0005937	35	110	18	185
565	0.0006346	59	131	18	203
566	0.0006107	3	104	18	205
567	0.0005648	61	128	13	195
568	0.0005919	11	107	17	203
569	0.0005573	7	92	18	177
570	0.0005678	32	111	18	190
571	0.0005118	8	94	18	180
572	0.0006254	9	109	15	209
573	0.0005643	0	120	17	240
574	0.0007145	2	103	17	204
575	0.0005994	21	100	17	179
576	0.000648	13	107	14	201
577	0.0006601	19	118	18	217
578	0.0006619	14	112	15	210
579	0.0005793	33	128	18	223
580	0.0006532	47	126	19	205
581	0.0006349	9	115	18	221
582	0.0006477	34	123	17	212
583	0.0006415	13	110	19	207
584	0.0005772	10	101	18	192
585	0.0005989	33	110	16	187
586	0.0005507	44	126	16	208
587	0.0006487	18	114	18	210
588	0.0005541	42	120	19	198
589	0.0006413	18	102	14	186
590	0.0005529	38	109	19	180
591	0.0005335	42	121	16	200
592	0.000696	2	107	19	212
593	0.0006116	12	118	18	224
594	0.0006359	25	108	18	191
595	0.0005134	60	129	16	198
596	0.0006125	16	111	17	206
597	0.000588	6	111	18	216
598	0.0007997	72	123	17	174
599	0.0006169	58	124	14	190
600	0.0006111	36	109	19	182
601	0.0005828	49	114	17	179
602	0.0006455	15	104	19	193
603	0.0005842	14	102	15	190
604	0.0007722	17	117	17	217
605	0.0005933	19	107	18	195
606	0.0006467	34	124	18	214
607	0.0005789	5	113	16	221
608	0.000553	23	106	17	189
609	0.0005551	33	125	17	217
610	0.0005199	7	100	16	193
611	0.0005718	16	114	18	212
612	0.0005723	3	98	16	193
613	0.0006149	55	135	19	215
614	0.0005521	2	93	17	184
615	0.0006143	51	118	18	185
616	0.0005525	5	109	17	213
617	0.0007029	27	113	16	199
618	0.0005132	10	92	14	174
619	0.0005442	16	94	15	172
620	0.0006605	22	110	16	198
621	0.0004598	88	141	14	194
622	0.0006032	12	114	15	216
623	0.0005969	28	118	19	208
624	0.0005231	2	92	15	182
625	0.0006075	7	110	19	213
626	0.0006593	30	115	18	200
627	0.0005793	5	94	17	183
628	0.0006192	33	110	17	187
629	0.0006554	46	113	18	180
630	0.0005938	13	115	19	217
631	0.0006575	53	144	18	235
632	0.000587	5	108	15	211
633	0.000536	8	89	15	170
634	0.0006356	2	105	19	208
635	0.0005564	2	96	16	190
636	0.0005262	57	137	19	217
637	0.0007372	17	109	16	201
638	0.0005512	20	92	17	164
639	0.000591	20	113	19	206
640	0.0005691	14	105	16	196
641	0.0006109	6	104	16	202
642	0.0005898	32	102	19	172
643	0.0005634	17	118	19	219
644	0.0005436	10	106	17	202
645	0.0006287	36	123	19	210
646	0.0006323	2	103	17	204
647	0.0005652	32	114	15	196
648	0.0005916	19	91	17	163
649	0.0006561	25	103	14	181
650	0.000604	32	111	16	190
651	0.0006117	1	108	19	215
652	0.0005889	31	129	18	227
653	0.00061	30	107	17	184
654	0.0005933	27	103	19	179
655	0.0005999	79	142	18	205
656	0.0005427	25	100	13	175
657	0.0005998	70	125	18	180
658	0.0006193	18	114	17	210
659	0.0005149	4	94	16	184
660	0.0008163	19	102	16	185
661	0.0005866	21	120	19	219
662	0.000583	6	100	15	194
663	0.0005559	22	111	17	200
664	0.0006841	58	138	18	218
665	0.0005285	1	100	18	199
666	0.0005776	6	110	17	214
667	0.0005785	2	88	17	174
668	0.0006465	4	101	17	198
669	0.00053	21	110	17	199
670	0.0005514	2	90	16	178
671	0.0007438	4	115	19	226
672	0.0005825	20	103	16	186
673	0.0006136	17	113	19	209
674	0.0005398	27	113	14	199
675	0.0005818	17	106	18	195
676	0.0005666	8	108	17	208
677	0.0006139	7	95	19	183
678	0.0006444	17	116	19	215
679	0.0006528	11	114	19	217
680	0.0006372	15	108	16	201
681	0.0006654	15	123	17	231
682	0.0006909	41	130	17	219
683	0.0006316	23	123	17	223
684	0.0005678	5	95	16	185
685	0.0005513	31	107	15	183
686	0.0005589	54	119	16	184
687	0.0006705	5	110	17	215
688	0.0005818	22	97	18	172
689	0.0005923	8	103	17	198
690	0.0005847	4	84	17	164
691	0.0005937	37	126	19	215
692	0.0005356	5	94	14	183
693	0.0006692	7	104	17	201
694	0.000595	11	100	15	189
695	0.0006106	28	114	17	200
696	0.0006132	22	102	19	182
697	0.0006204	25	128	17	231
698	0.0006523	37	121	19	205
699	0.0005301	3	87	15	171
700	0.0005784	21	105	17	189
701	0.0006146	0	107	17	214
702	0.0005988	13	103	19	193
703	0.0005459	24	107	19	190
704	0.0006191	19	96	19	173
705	0.0005238	46	124	17	202
706	0.0006918	86	156	17	226
707	0.0006871	5	100	17	195
708	0.0006333	21	107	16	193
709	0.0005741	0	100	19	200
710	0.0005689	22	96	15	170
711	0.0006089	6	97	17	188
712	0.0007191	19	101	15	183
713	0.0006002	29	115	16	201
714	0.0006102	41	127	17	213
715	0.0006336	29	113	17	197
716	0.0007944	25	120	18	215
717	0.0006708	18	100	18	182
718	0.0006709	1	94	15	187
719	0.0005191	2	96	18	190
720	0.0006574	22	120	14	218
721	0.0006058	12	110	16	208
722	0.0006243	19	104	17	189
723	0.0006814	24	121	18	218
724	0.0004809	41	105	17	169
725	0.0005884	44	127	17	210
726	0.0005589	18	108	17	198
727	0.0005914	21	91	17	161
728	0.0005634	11	111	19	211
729	0.0005732	42	112	15	182
730	0.0005289	42	104	15	166
731	0.0006089	26	129	17	232
732	0.0005826	13	121	19	229
733	0.0005448	14	99	19	184
734	0.0006411	38	111	19	184
735	0.0005866	6	91	19	176
736	0.0005259	67	135	17	203
737	0.0005495	22	104	19	186
738	0.000632	37	119	17	201
739	0.0005172	4	97	18	190
740	0.0005491	43	125	18	207
741	0.0006273	11	116	16	221
742	0.0007304	41	129	19	217
743	0.0005832	31	114	15	197
744	0.000568	16	105	18	194
745	0.0005835	58	136	19	214
746	0.0004674	11	94	16	177
747	0.0005379	10	106	16	202
748	0.0006042	4	96	16	188
749	0.000635	45	125	18	205
750	0.0005665	67	139	17	211
751	0.0005516	4	94	17	184
752	0.0007998	31	116	18	201
753	0.0005924	25	108	16	191
754	0.000682	62	129	18	196
755	0.0006271	39	112	15	185
756	0.0005797	56	134	19	212
757	0.0006101	34	130	18	226
758	0.0006304	35	112	18	189
759	0.0006805	83	141	17	199
760	0.0005725	51	118	17	185
761	0.0005885	9	101	18	193
762	0.0005617	39	121	18	203
763	0.0005525	12	106	16	200
764	0.0006013	11	101	16	191
765	0.0006651	55	129	16	203
766	0.0007732	15	112	18	209
767	0.0007149	38	125	19	212
768	0.0006658	7	111	18	215
769	0.0006517	24	116	19	208
770	0.0005282	16	99	17	182
771	0.0006166	13	102	17	191
772	0.0007614	20	102	16	184
773	0.0006135	19	110	19	201
774	0.0006083	10	110	16	210
775	0.0006779	26	121	17	216
776	0.0005606	8	102	16	196
777	0.0005535	57	128	17	199
778	0.0004782	29	101	17	173
779	0.0006226	53	135	18	217
780	0.0005582	29	104	18	179
781	0.000594	48	108	16	168
782	0.0006016	28	119	16	210
783	0.0005453	48	118	18	188
784	0.0005736	16	110	18	204
785	0.000567	16	102	19	188
786	0.0005871	18	97	14	176
787	0.0005628	36	116	14	196
788	0.0005926	38	112	18	186
789	0.0005608	19	106	17	193
790	0.0005932	52	127	15	202
791	0.0005886	18	108	16	198
792	0.0006285	48	137	18	226
793	0.0005916	0	99	19	198
794	0.000679	45	119	19	193
795	0.0005687	12	106	17	200
796	0.0006438	9	107	19	205
797	0.0005589	6	99	18	192
798	0.0007454	15	104	15	193
799	0.0005393	3	84	16	165
800	0.0005302	1	96	16	191
801	0.0006013	29	108	19	187
802	0.0004707	1	88	16	175
803	0.0005977	27	109	18	191
804	0.0005351	13	106	16	199
805	0.0005265	32	110	18	188
806	0.0006076	26	112	17	198
807	0.0006103	32	129	18	226
808	0.0006061	7	100	16	193
809	0.0005685	51	117	19	183
810	0.0006094	93	162	18	231
811	0.0005474	10	106	19	202
812	0.0006268	10	108	19	206
813	0.000597	12	108	16	204
814	0.0006221	18	119	19	220
815	0.0006822	63	139	17	215
816	0.0005974	10	105	15	200
817	0.0005122	6	93	18	180
818	0.0006362	12	110	16	208
819	0.0005869	45	112	14	179
820	0.0005775	28	108	15	188
821	0.0006846	37	126	16	215
822	0.0006324	14	109	19	204
823	0.0005481	7	101	18	195
824	0.0006764	8	109	16	210
825	0.0006035	2	98	19	194
826	0.0005966	23	92	17	161
827	0.0005353	42	118	18	194
828	0.0005181	40	125	17	210
829	0.000721	47	121	18	195
830	0.000632	58	148	18	238
831	0.0006769	29	124	19	219
832	0.0005724	3	101	19	199
833	0.0005354	20	109	18	198
834	0.0006453	24	109	19	194
835	0.0005552	33	131	19	229
836	0.0006007	17	105	14	193
837	0.0006592	36	113	17	190
838	0.0006634	12	105	18	198
839	0.0005676	23	115	15	207
840	0.0005267	16	114	17	212
841	0.0006294	26	109	18	192
842	0.0005669	4	95	19	186
843	0.0006446	25	108	19	191
844	0.0005256	10	86	13	162
845	0.0006046	70	138	18	206
846	0.0006555	27	117	15	207
847	0.0005568	36	119	19	202
848	0.0006126	16	107	19	198
849	0.0005897	16	123	16	230
850	0.0005792	1	106	19	211
851	0.0005741	33	106	15	179
852	0.0005552	5	101	18	197
853	0.0007931	13	112	19	211
854	0.0005588	38	118	17	198
855	0.0007305	81	146	19	211
856	0.00053	10	88	15	166
857	0.0005567	6	98	19	190
858	0.0006185	1	105	15	209
859	0.0005684	48	123	17	198
860	0.0006159	15	98	15	181
861	0.0006495	30	115	18	200
862	0.0006517	10	104	19	198
863	0.0005738	4	99	19	194
864	0.0005642	17	106	17	195
865	0.0005426	18	102	15	186
866	0.000595	15	116	19	217
867	0.0005921	27	117	17	207
868	0.0006257	15	115	18	215
869	0.0007687	48	130	19	212
870	0.0008694	93	165	17	237
871	0.000643	37	115	17	193
872	0.0005929	37	120	18	203
873	0.0005674	2	110	18	218
874	0.0006022	1	96	16	191
875	0.0005692	10	104	18	198
876	0.0006406	38	119	19	200
877	0.0005314	27	108	19	189
878	0.0005474	17	94	15	171
879	0.0006065	21	120	18	219
880	0.0005896	17	113	18	209
881	0.0006041	8	101	19	194
882	0.0005972	3	90	17	177
883	0.0005981	17	98	15	179
884	0.0006929	26	115	17	204
885	0.0006673	38	113	16	188
886	0.0005647	61	127	19	193
887	0.0006067	5	94	16	183
888	0.0006133	41	109	19	177
889	0.0005252	7	100	18	193
890	0.0009504	3	96	17	189
891	0.0006245	4	104	18	204
892	0.000529	26	106	19	186
893	0.0005813	34	116	16	198
894	0.0006342	29	119	15	209
895	0.0005589	46	115	16	184
896	0.0005516	11	108	16	205
897	0.0006338	20	100	16	180
898	0.0005521	87	149	18	211
899	0.0006226	15	109	16	203
900	0.0005236	6	95	16	184
901	0.000577	3	98	17	193
902	0.0005761	56	125	18	194
903	0.0006646	30	117	18	204
904	0.0006391	16	111	17	206
905	0.0006141	17	107	18	197
906	0.0005478	13	98	19	183
907	0.0005541	20	101	16	182
908	0.0004934	0	81	16	162
909	0.0006049	2	92	19	182
910	0.0006235	67	145	18	223
911	0.0005707	10	96	18	182
912	0.0006341	4	122	19	240
913	0.0006363	28	106	17	184
914	0.0006413	12	128	19	244
915	0.0007888	26	99	18	172
916	0.000592	1	101	18	201
917	0.0005335	15	111	17	207
918	0.0006133	15	103	19	191
919	0.0005795	34	127	17	220
920	0.0006675	2	106	16	210
921	0.0005821	42	126	16	210
922	0.0005334	11	104	16	197
923	0.0005576	35	100	14	165
924	0.0006748	16	111	19	206
925	0.0004881	72	134	19	196
926	0.0006201	2	98	17	194
927	0.0006131	8	110	17	212
928	0.0007306	6	103	16	200
929	0.0005606	3	80	13	157
930	0.0006358	43	129	17	215
931	0.0006684	5	103	18	201
932	0.0005253	13	97	15	181
933	0.0005593	20	96	17	172
934	0.0005773	19	107	16	195
935	0.0006761	2	103	15	204
936	0.0005781	6	91	18	176
937	0.0006143	18	109	18	200
938	0.0006413	34	109	18	184
939	0.0005237	31	108	14	185
940	0.0005532	21	103	18	185
941	0.0005349	5	87	13	169
942	0.0005552	43	121	16	199
943	0.000606	47	115	16	183
944	0.0004993	5	97	18	189
945	0.0005915	18	113	17	208
946	0.000644	53	119	17	185
947	0.0006258	5	115	17	225
948	0.0005123	14	91	12	168
949	0.000586	19	99	19	179
950	0.0006348	11	98	17	185
951	0.0005953	44	125	19	206
952	0.0006378	7	107	17	207
953	0.000664	1	99	18	197
954	0.0006449	3	93	17	183
955	0.0006055	10	116	19	222
956	0.0005422	10	93	16	176
957	0.0004995	64	137	18	210
958	0.0005814	31	106	19	181
959	0.0006777	29	119	18	209
960	0.000607	39	125	17	211
961	0.0005809	8	98	18	188
962	0.0005673	1	99	19	197
963	0.0005144	5	87	16	169
964	0.0005582	5	100	17	195
965	0.0005365	39	102	16	165
966	0.0007089	25	106	16	187
967	0.0006075	45	117	15	189
968	0.0006659	71	135	16	199
969	0.0006024	32	105	15	178
970	0.0005862	3	107	18	211
971	0.0005934	9	107	16	205
972	0.0006231	30	115	19	200
973	0.0005329	28	104	19	180
974	0.0005968	3	109	19	215
975	0.0006302	62	145	19	228
976	0.0005885	32	119	18	206
977	0.0006261	30	111	19	192
978	0.0006039	16	97	19	178
979	0.0005037	37	116	19	195
980	0.0006408	4	101	17	198
981	0.0006307	23	96	19	169
982	0.0006008	37	124	15	211
983	0.0006646	26	115	17	204
984	0.0006091	37	102	18	167
985	0.0007221	44	133	19	222
986	0.000589	3	98	18	193
987	0.0005826	10	115	16	220
988	0.0006267	31	115	18	199
989	0.0006508	11	101	18	191
990	0.0006453	39	121	18	203
991	0.0006213	14	121	15	228
992	0.0006532	17	113	19	209
993	0.0005938	10	103	18	196
994	0.0005916	9	102	18	195
995	0.0006423	17	107	19	197
996	0.0005404	7	101	16	195
997	0.0005651	11	110	19	209
998	0.0006116	8	106	19	204
999	0.0007611	22	129	19	236
mean	0.000603561	23.072	110.058	17.205	197.044

## Sheet: PowerBalance_SEq
	time	SEq	Bal	Reg	Egal
0	0.000488	4	94	17	184
1	0.0004443	4	100	17	196
2	0.0004812	21	94	13	167
3	0.0005629	7	109	19	211
4	0.0005165	1	103	19	205
5	0.0004591	1	102	16	203
6	0.0005373	20	120	19	220
7	0.0005118	8	110	16	212
8	0.0004635	32	117	19	202
9	0.0004948	34	114	17	194
10	0.0006235	80	151	19	222
11	0.0004706	39	129	16	219
12	0.0004513	29	101	18	173
13	0.0003506	14	92	17	170
14	0.0004933	14	107	17	200
15	0.0004801	36	131	18	226
16	0.0005218	75	124	18	173
17	0.0005496	4	84	19	164
18	0.0005024	9	105	17	201
19	0.0004542	22	102	17	182
20	0.0004978	0	99	19	198
21	0.0004666	2	109	18	216
22	0.0004481	2	102	17	202
23	0.0004945	40	124	18	208
24	0.0005569	27	119	19	211
25	0.0005153	11	113	17	215
26	0.0003636	3	90	18	177
27	0.0004886	4	104	17	204
28	0.0004805	32	116	18	200
29	0.000471	20	125	18	230
30	0.000463	7	104	19	201
31	0.0004922	23	117	17	211
32	0.0003719	12	107	18	202
33	0.000459	22	92	14	162
34	0.0004746	2	104	17	206
35	0.0004727	35	94	17	153
36	0.0004996	13	115	16	217
37	0.0004728	20	106	18	192
38	0.0005002	2	102	19	202
39	0.0004529	4	97	18	190
40	0.0004652	15	125	19	235
41	0.0003437	10	91	15	172
42	0.0004755	0	98	19	196
43	0.0004885	61	139	19	217
44	0.0004779	1	108	18	215
45	0.0003856	1	83	15	165
46	0.0004601	24	91	13	158
47	0.0005071	15	111	19	207
48	0.0004829	12	108	16	204
49	0.0004684	2	121	17	240
50	0.0004728	50	120	17	190
51	0.0004805	15	110	18	205
52	0.0003457	6	89	13	172
53	0.0004464	11	109	19	207
54	0.0004587	16	108	19	200
55	0.0003528	7	97	15	187
56	0.0004681	18	117	17	216
57	0.0004667	3	115	16	227
58	0.0003475	14	97	16	180
59	0.0004819	1	109	18	217
60	0.0004837	49	120	17	191
61	0.000479	8	116	17	224
62	0.0003456	19	96	19	173
63	0.000472	10	102	16	194
64	0.0004896	1	112	18	223
65	0.0004589	15	99	19	183
66	0.0004406	9	103	18	197
67	0.0004509	9	94	15	179
68	0.0004495	19	108	14	197
69	0.000465	28	111	16	194
70	0.0004628	7	103	19	199
71	0.000489	58	132	17	206
72	0.0004546	4	104	18	204
73	0.0004532	13	103	18	193
74	0.0004659	18	103	19	188
75	0.0004419	44	107	17	170
76	0.0003616	6	99	19	192
77	0.0003642	8	85	18	162
78	0.0004699	4	97	19	190
79	0.0004379	22	105	17	188
80	0.0005461	4	90	15	176
81	0.0004774	12	96	17	180
82	0.0004535	29	109	17	189
83	0.0004676	42	107	14	172
84	0.0004752	3	100	15	197
85	0.0004639	1	88	18	175
86	0.0004585	9	103	19	197
87	0.0004664	4	100	18	196
88	0.0004743	23	118	18	213
89	0.0005137	15	115	18	215
90	0.0004566	1	103	19	205
91	0.0004898	16	107	15	198
92	0.0004767	31	108	18	185
93	0.00046	17	105	18	193
94	0.0003527	2	99	19	196
95	0.0003373	9	88	14	167
96	0.0003853	4	105	16	206
97	0.0004701	21	116	17	211
98	0.0003832	3	94	13	185
99	0.0004831	15	95	13	175
100	0.0004727	28	107	19	186
101	0.0004539	7	101	19	195
102	0.0005058	1	94	19	187
103	0.000461	10	107	19	204
104	0.0004536	20	101	16	182
105	0.0004715	38	110	17	182
106	0.0005417	27	109	19	191
107	0.0004785	44	112	17	180
108	0.0004976	34	111	19	188
109	0.0003671	7	98	18	189
110	0.0004946	16	104	15	192
111	0.0005065	15	105	19	195
112	0.0004674	21	101	18	181
113	0.00048	59	131	18	203
114	0.0004816	16	111	17	206
115	0.0005084	3	103	19	203
116	0.0006074	43	132	17	221
117	0.0003343	0	94	19	188
118	0.0004907	15	117	18	219
119	0.0004814	16	101	16	186
120	0.000383	14	91	17	168
121	0.0005575	2	112	17	222
122	0.0005596	26	100	19	174
123	0.0004683	34	131	18	228
124	0.000462	5	108	18	211
125	0.000472	62	128	15	194
126	0.0004883	17	112	19	207
127	0.0004745	30	117	15	204
128	0.0004688	22	112	17	202
129	0.0004853	3	116	16	229
130	0.0005315	2	107	15	212
131	0.0004812	56	125	16	194
132	0.0004473	12	95	17	178
133	0.0004657	31	134	17	237
134	0.0004633	37	118	14	199
135	0.0004617	41	115	15	189
136	0.0004421	10	112	19	214
137	0.0004592	1	106	18	211
138	0.0004879	20	111	18	202
139	0.0004878	19	113	15	207
140	0.0005182	6	107	16	208
141	0.0005267	40	132	18	224
142	0.0004497	32	117	18	202
143	0.0004985	1	105	18	209
144	0.0005076	2	77	17	152
145	0.0004669	6	109	19	212
146	0.0003589	5	94	17	183
147	0.0004655	11	109	17	207
148	0.0004629	1	101	18	201
149	0.0004999	2	90	18	178
150	0.0004622	16	121	17	226
151	0.0005063	20	113	19	206
152	0.0004985	25	105	19	185
153	0.0004635	14	105	19	196
154	0.0004677	7	106	19	205
155	0.0004585	9	101	18	193
156	0.0004612	2	96	18	190
157	0.0004949	5	101	18	197
158	0.0003512	1	94	19	187
159	0.0003813	3	98	18	193
160	0.0004722	18	100	15	182
161	0.0003501	0	95	18	190
162	0.0003212	12	93	13	174
163	0.0004647	16	100	15	184
164	0.0005526	5	110	17	215
165	0.000485	7	100	15	193
166	0.0003937	1	111	13	221
167	0.0005009	24	119	16	214
168	0.0004453	5	78	16	151
169	0.0004679	14	110	15	206
170	0.0004586	13	87	15	161
171	0.0004655	8	99	19	190
172	0.0005494	39	126	17	213
173	0.0005455	12	105	15	198
174	0.0003357	3	90	18	177
175	0.000438	4	94	17	184
176	0.0004654	25	109	17	193
177	0.000467	13	109	18	205
178	0.0003634	5	87	15	169
179	0.0004167	5	103	16	201
180	0.0005407	24	121	17	218
181	0.000473	5	96	17	187
182	0.0004556	36	116	18	196
183	0.0004938	9	99	19	189
184	0.0005106	5	108	18	211
185	0.0004613	11	89	17	167
186	0.0004777	23	106	17	189
187	0.0003439	14	113	17	212
188	0.0004797	22	122	18	222
189	0.000468	18	104	15	190
190	0.0003404	2	101	17	200
191	0.0004839	26	129	18	232
192	0.0003106	1	100	15	199
193	0.0005177	34	131	19	228
194	0.0004627	15	121	17	227
195	0.0004805	37	112	18	187
196	0.0005013	14	114	18	214
197	0.0003583	29	102	13	175
198	0.0004557	8	96	18	184
199	0.0004735	32	121	19	210
200	0.0004607	31	122	19	213
201	0.0004781	4	95	18	186
202	0.0005259	25	105	16	185
203	0.0005659	42	109	17	176
204	0.0004567	15	107	18	199
205	0.0004559	21	117	19	213
206	0.0005048	4	100	16	196
207	0.0004568	10	116	17	222
208	0.0003459	2	107	16	212
209	0.0004556	31	106	19	181
210	0.0004603	1	101	16	201
211	0.0004776	1	99	17	197
212	0.0004627	3	100	15	197
213	0.0004571	5	84	14	163
214	0.0004588	14	111	19	208
215	0.0004474	10	103	17	196
216	0.0005395	12	110	18	208
217	0.000477	24	113	19	202
218	0.0004622	14	105	19	196
219	0.0004692	28	99	15	170
220	0.0004684	7	103	17	199
221	0.0005739	33	119	18	205
222	0.0004608	10	93	18	176
223	0.0004879	1	91	17	181
224	0.0004424	17	108	19	199
225	0.0004726	17	105	16	193
226	0.0004878	14	115	19	216
227	0.0005196	4	113	16	222
228	0.000486	37	113	16	189
229	0.0005411	3	93	15	183
230	0.0003824	10	99	16	188
231	0.0003612	3	87	18	171
232	0.0004702	17	108	18	199
233	0.0004935	18	106	19	194
234	0.0004703	32	118	16	204
235	0.0004644	9	99	19	189
236	0.0004622	40	126	19	212
237	0.0004755	14	106	19	198
238	0.0004494	10	94	17	178
239	0.0004633	6	96	19	186
240	0.0004626	0	94	18	188
241	0.0004558	9	105	19	201
242	0.0004869	11	85	17	159
243	0.0004918	25	109	16	193
244	0.0004776	15	107	18	199
245	0.0004516	36	108	17	180
246	0.0003529	5	77	17	149
247	0.0005409	4	111	18	218
248	0.0004596	14	91	18	168
249	0.0004724	56	126	15	196
250	0.000468	6	104	16	202
251	0.0004907	67	138	17	209
252	0.00047	23	108	17	193
253	0.000492	37	106	18	175
254	0.0004744	3	107	14	211
255	0.0004699	14	110	17	206
256	0.0004761	0	109	18	218
257	0.000532	11	98	14	185
258	0.00046	19	104	18	189
259	0.0004764	16	94	17	172
260	0.0004592	16	107	16	198
261	0.0004669	5	112	17	219
262	0.0004742	24	115	19	206
263	0.0004887	14	117	18	220
264	0.0004502	8	102	14	196
265	0.0004603	24	125	19	226
266	0.000486	9	117	17	225
267	0.0005205	24	98	18	172
268	0.0005209	1	113	19	225
269	0.0004744	35	107	16	179
270	0.0003714	3	97	18	191
271	0.0005446	20	104	14	188
272	0.0004884	40	117	19	194
273	0.0012907	15	110	19	205
274	0.0005136	17	114	17	211
275	0.000475	5	81	18	157
276	0.0005482	36	116	17	196
277	0.000484	27	102	19	177
278	0.0005054	13	110	19	207
279	0.0004644	11	99	17	187
280	0.0004548	13	100	15	187
281	0.0004699	9	106	16	203
282	0.000465	15	107	17	199
283	0.0004916	43	111	12	179
284	0.0003616	22	100	16	178
285	0.0004778	27	107	16	187
286	0.0004675	9	106	18	203
287	0.0004697	6	90	19	174
288	0.000399	8	112	15	216
289	0.0004847	29	120	16	211
290	0.0004704	4	83	14	162
291	0.0004538	10	106	18	202
292	0.0004842	3	96	19	189
293	0.0004985	9	90	17	171
294	0.0005058	69	136	19	203
295	0.0004747	4	105	19	206
296	0.0004565	14	108	19	202
297	0.0004607	14	107	17	200
298	0.0004725	14	96	19	178
299	0.0004992	33	109	17	185
300	0.0004817	13	114	17	215
301	0.0004808	40	117	18	194
302	0.0003759	16	107	16	198
303	0.000472	2	94	17	186
304	0.0005737	25	107	18	189
305	0.0003763	4	80	15	156
306	0.0003613	0	96	19	192
307	0.0004823	17	108	18	199
308	0.0004949	9	103	19	197
309	0.0003567	0	93	18	186
310	0.0003335	3	83	19	163
311	0.0005695	18	109	18	200
312	0.0004825	2	102	19	202
313	0.0004582	14	119	18	224
314	0.0003284	2	90	17	178
315	0.0004604	3	104	18	205
316	0.0004787	25	103	14	181
317	0.0004594	4	95	18	186
318	0.0003704	2	90	19	178
319	0.000468	1	103	17	205
320	0.0004957	12	105	16	198
321	0.0004668	32	108	18	184
322	0.0005185	2	106	19	210
323	0.0004784	6	84	17	162
324	0.000563	6	97	16	188
325	0.0005423	24	104	13	184
326	0.0004692	19	103	18	187
327	0.0004697	20	119	17	218
328	0.0004817	39	120	19	201
329	0.0004807	48	116	18	184
330	0.0004547	4	97	19	190
331	0.0003331	1	90	15	179
332	0.000463	27	104	15	181
333	0.0004781	14	106	18	198
334	0.0004701	64	126	18	188
335	0.0004918	5	109	18	213
336	0.0004803	42	124	19	206
337	0.000486	31	131	17	231
338	0.0004742	15	103	17	191
339	0.0005126	29	125	17	221
340	0.0004728	8	109	19	210
341	0.0004886	1	97	19	193
342	0.0004707	5	97	15	189
343	0.0003633	3	104	19	205
344	0.0003499	14	100	17	186
345	0.0005246	66	122	19	178
346	0.0004511	12	97	17	182
347	0.0006227	9	102	18	195
348	0.0004877	41	115	17	189
349	0.0004672	21	109	18	197
350	0.0004713	24	120	19	216
351	0.0006109	66	123	18	180
352	0.0004505	3	101	18	199
353	0.0005051	50	136	19	222
354	0.0004419	29	101	18	173
355	0.0005226	40	123	18	206
356	0.0003847	4	104	17	204
357	0.0004541	9	84	15	159
358	0.0004559	9	92	19	175
359	0.0005069	36	121	17	206
360	0.0004858	65	131	18	197
361	0.0003406	1	85	15	169
362	0.000473	32	121	19	210
363	0.0004645	8	90	13	172
364	0.000457	33	113	18	193
365	0.0004525	8	105	19	202
366	0.00046	23	123	19	223
367	0.0005092	10	109	14	208
368	0.0003455	7	82	18	157
369	0.0004444	5	92	19	179
370	0.0004674	10	98	15	186
371	0.0004574	6	110	17	214
372	0.0004651	20	108	18	196
373	0.0005618	6	90	19	174
374	0.0003319	3	87	17	171
375	0.0004501	16	97	17	178
376	0.000457	23	107	19	191
377	0.0003624	17	90	19	163
378	0.0004857	6	94	18	182
379	0.0005068	11	113	17	215
380	0.0004608	4	99	17	194
381	0.0004511	15	115	19	215
382	0.0004475	5	110	19	215
383	0.0004609	22	111	18	200
384	0.0004823	35	110	15	185
385	0.0004689	8	111	19	214
386	0.0004507	16	105	18	194
387	0.0004933	41	130	18	219
388	0.0004885	14	113	19	212
389	0.0004537	37	117	12	197
390	0.0003702	11	108	15	205
391	0.000501	6	129	19	252
392	0.000472	5	115	19	225
393	0.0003725	1	104	19	207
394	0.000547	20	102	18	184
395	0.0004667	18	107	19	196
396	0.0005236	61	135	17	209
397	0.0003668	24	101	17	178
398	0.0004791	21	108	16	195
399	0.0005143	83	150	17	217
400	0.0004593	14	101	18	188
401	0.000521	1	105	18	209
402	0.0003433	4	81	18	158
403	0.0003534	8	109	17	210
404	0.0004951	33	120	19	207
405	0.0003492	13	98	18	183
406	0.0004719	13	124	18	235
407	0.0003296	0	95	15	190
408	0.0004673	2	100	16	198
409	0.0004463	16	105	18	194
410	0.0004864	6	118	17	230
411	0.0003432	17	98	17	179
412	0.0005159	4	97	17	190
413	0.0005153	28	123	19	218
414	0.0004648	15	97	16	179
415	0.000502	6	105	17	204
416	0.0004555	8	98	15	188
417	0.0005044	57	134	19	211
418	0.0005073	16	100	16	184
419	0.000449	17	100	17	183
420	0.0004919	28	121	18	214
421	0.0004653	2	98	17	194
422	0.0004486	1	92	16	183
423	0.0003373	10	96	13	182
424	0.000459	19	113	19	207
425	0.0004768	25	122	16	219
426	0.0004732	21	99	19	177
427	0.0005098	4	84	15	164
428	0.0005083	12	111	17	210
429	0.0004684	26	116	19	206
430	0.0005288	17	117	18	217
431	0.0004614	14	115	18	216
432	0.0005073	28	110	15	192
433	0.0003523	4	105	17	206
434	0.0005122	13	102	18	191
435	0.0003402	2	90	18	178
436	0.0005035	22	130	19	238
437	0.00035	1	91	16	181
438	0.0004726	47	126	15	205
439	0.0005289	13	108	17	203
440	0.0004574	4	102	16	200
441	0.0003725	8	98	17	188
442	0.0004807	15	111	18	207
443	0.0004809	10	110	19	210
444	0.0005044	7	111	18	215
445	0.0004712	44	127	18	210
446	0.0004515	21	111	18	201
447	0.0004837	3	96	16	189
448	0.0004567	25	109	19	193
449	0.0004783	10	102	19	194
450	0.0004902	8	104	19	200
451	0.0004575	22	100	15	178
452	0.0003539	5	91	15	177
453	0.0005242	21	118	19	215
454	0.000484	22	108	19	194
455	0.0004914	17	102	19	187
456	0.0005061	26	119	19	212
457	0.0004666	39	123	16	207
458	0.0004676	10	95	19	180
459	0.0005193	59	145	18	231
460	0.0003727	4	112	18	220
461	0.0004774	4	111	18	218
462	0.000492	5	108	15	211
463	0.000344	9	109	16	209
464	0.0004566	14	110	16	206
465	0.000459	8	115	19	222
466	0.0004635	7	93	17	179
467	0.0003568	17	92	15	167
468	0.0004658	34	116	17	198
469	0.0004501	30	114	15	198
470	0.0004782	35	114	16	193
471	0.0004507	19	111	18	203
472	0.0004869	21	102	19	183
473	0.0005379	40	122	17	204
474	0.0003746	2	109	18	216
475	0.0004992	16	104	17	192
476	0.0004645	2	77	12	152
477	0.0004555	31	122	16	213
478	0.0004784	2	91	14	180
479	0.0004676	12	103	14	194
480	0.0004651	12	100	16	188
481	0.0005032	49	120	17	191
482	0.0004555	6	104	19	202
483	0.0004601	8	113	18	218
484	0.0005223	22	96	18	170
485	0.0003431	14	93	19	172
486	0.000467	8	116	19	224
487	0.0004845	35	126	16	217
488	0.0005156	2	95	19	188
489	0.0004115	12	110	16	208
490	0.0005022	2	107	17	212
491	0.0004789	15	106	16	197
492	0.000475	13	119	18	225
493	0.0004667	54	121	16	188
494	0.0004646	4	99	18	194
495	0.0005647	44	131	19	218
496	0.0004779	8	107	17	206
497	0.0003571	10	98	18	186
498	0.0003233	3	93	14	183
499	0.0004541	4	106	18	208
500	0.000484	10	95	16	180
501	0.0005327	27	109	15	191
502	0.0004699	1	99	18	197
503	0.0004704	4	103	14	202
504	0.0004903	6	102	15	198
505	0.0004904	37	126	19	215
506	0.0004734	11	113	14	215
507	0.0004646	5	120	19	235
508	0.00035	9	89	17	169
509	0.0004647	8	106	17	204
510	0.0005016	12	113	19	214
511	0.0003338	1	88	16	175
512	0.0004785	20	111	19	202
513	0.0004898	7	98	19	189
514	0.0004651	9	99	14	189
515	0.0004579	6	95	14	184
516	0.0004826	10	109	18	208
517	0.0005124	14	96	18	178
518	0.0004582	33	115	18	197
519	0.0003613	4	91	19	178
520	0.0004837	1	99	19	197
521	0.0004523	18	109	15	200
522	0.0005115	17	108	19	199
523	0.0004645	10	107	17	204
524	0.0004637	14	103	16	192
525	0.000463	27	103	17	179
526	0.0003519	5	113	16	221
527	0.0004591	2	87	15	172
528	0.0003309	0	87	13	174
529	0.0003413	4	95	18	186
530	0.0004555	31	110	17	189
531	0.0005652	6	108	18	210
532	0.0004895	48	120	17	192
533	0.0003452	1	80	15	159
534	0.0004872	17	118	17	219
535	0.0004664	51	121	19	191
536	0.0004884	8	110	19	212
537	0.0004792	7	101	19	195
538	0.0003607	19	110	15	201
539	0.0003539	3	99	14	195
540	0.0004854	34	127	17	220
541	0.000507	5	112	17	219
542	0.0004585	16	103	15	190
543	0.0004538	22	112	18	202
544	0.0004726	16	98	18	180
545	0.0004773	16	120	18	224
546	0.0004595	1	106	14	211
547	0.0004797	14	103	19	192
548	0.0004972	24	120	19	216
549	0.0004572	15	110	15	205
550	0.0005005	70	137	17	204
551	0.0004634	26	105	17	184
552	0.0005092	4	103	19	202
553	0.0003685	8	93	18	178
554	0.0004588	9	102	18	195
555	0.0004551	1	106	15	211
556	0.0004781	12	112	16	212
557	0.0004573	16	111	18	206
558	0.0004679	19	111	19	203
559	0.0004756	39	115	17	191
560	0.000469	61	140	16	219
561	0.0004785	14	97	18	180
562	0.0003553	11	99	18	187
563	0.0004598	18	101	16	184
564	0.0004549	1	96	18	191
565	0.0005082	59	131	18	203
566	0.000471	3	104	18	205
567	0.0004663	42	119	13	196
568	0.0004748	15	101	16	187
569	0.0004759	11	94	18	177
570	0.0004839	32	111	18	190
571	0.0003452	3	89	17	175
572	0.0003732	9	109	15	209
573	0.000541	0	120	17	240
574	0.0004675	2	103	17	204
575	0.0004775	21	100	17	179
576	0.0003874	13	107	14	201
577	0.000486	19	118	18	217
578	0.000514	14	112	15	210
579	0.0004992	0	114	16	228
580	0.0004893	47	126	19	205
581	0.0005044	9	115	18	221
582	0.0005027	34	123	17	212
583	0.0004814	13	110	19	207
584	0.0005234	15	101	18	187
585	0.0004677	28	107	16	186
586	0.000576	15	119	17	223
587	0.0004652	4	108	18	212
588	0.0004916	19	108	19	197
589	0.0004588	18	102	14	186
590	0.0004649	0	91	19	182
591	0.0004576	16	102	14	188
592	0.0004726	2	107	19	212
593	0.0004813	12	118	18	224
594	0.0004713	8	101	18	194
595	0.0004789	52	129	18	206
596	0.0005054	38	125	19	212
597	0.0004585	6	111	18	216
598	0.0005023	72	123	17	174
599	0.000528	15	106	15	197
600	0.0004651	36	109	19	182
601	0.0004889	4	101	18	198
602	0.000489	15	104	19	193
603	0.0005003	14	102	15	190
604	0.0004796	24	114	19	204
605	0.0003774	19	107	18	195
606	0.0005873	34	124	18	214
607	0.0004679	5	113	16	221
608	0.0004789	23	106	17	189
609	0.0004673	22	122	18	222
610	0.0003518	7	100	16	193
611	0.000505	16	114	18	212
612	0.0003625	3	98	16	193
613	0.0004895	55	135	19	215
614	0.0004733	2	93	17	184
615	0.0004699	51	118	18	185
616	0.0004606	5	109	17	213
617	0.0005034	2	102	18	202
618	0.0004706	10	92	14	174
619	0.0004684	16	94	15	172
620	0.0004689	6	107	16	208
621	0.0005047	51	121	15	191
622	0.0004772	12	114	15	216
623	0.0004804	9	112	19	215
624	0.000336	2	92	15	182
625	0.000497	37	125	16	213
626	0.0004669	25	121	18	217
627	0.0004636	5	94	17	183
628	0.0004708	33	110	17	187
629	0.0004603	5	106	17	207
630	0.0004665	13	115	19	217
631	0.0006741	10	114	18	218
632	0.0004589	5	108	15	211
633	0.0003366	8	89	15	170
634	0.0005388	2	105	19	208
635	0.000375	2	96	16	190
636	0.0004946	20	114	18	208
637	0.0004928	17	109	16	201
638	0.0003532	20	92	17	164
639	0.0004703	5	105	19	205
640	0.0004498	14	105	16	196
641	0.0004737	6	104	16	202
642	0.0004781	32	102	19	172
643	0.0004769	17	118	19	219
644	0.0004652	10	106	17	202
645	0.0004895	36	123	19	210
646	0.0004608	2	103	17	204
647	0.0004755	32	114	15	196
648	0.0004508	19	91	17	163
649	0.0004727	16	110	19	204
650	0.0004638	32	111	16	190
651	0.0005491	18	114	19	210
652	0.0004869	12	120	18	228
653	0.0004696	30	107	17	184
654	0.0004663	27	103	19	179
655	0.0005105	79	142	18	205
656	0.0003557	25	100	13	175
657	0.0004954	48	111	17	174
658	0.0004714	18	114	17	210
659	0.0004635	4	94	16	184
660	0.0004824	19	102	16	185
661	0.0004918	20	117	18	214
662	0.0004831	6	100	15	194
663	0.000468	22	111	17	200
664	0.0005443	29	131	18	233
665	0.0003662	1	100	18	199
666	0.0003577	6	110	17	214
667	0.0005674	2	88	17	174
668	0.0004544	16	106	13	196
669	0.0004923	21	110	17	199
670	0.0004013	2	90	16	178
671	0.0005085	4	115	19	226
672	0.0003544	20	103	16	186
673	0.0004468	17	113	19	209
674	0.0004628	22	104	15	186
675	0.0004576	7	103	16	199
676	0.0003522	8	108	17	208
677	0.0005325	7	95	19	183
678	0.0004725	17	116	19	215
679	0.0005475	11	114	19	217
680	0.0005064	15	108	16	201
681	0.0004877	15	123	17	231
682	0.0004945	41	130	17	219
683	0.000499	23	123	17	223
684	0.0003498	5	95	16	185
685	0.0004811	31	107	15	183
686	0.0004729	13	102	18	191
687	0.0004657	5	110	17	215
688	0.000461	19	90	18	161
689	0.0006714	12	111	19	210
690	0.0003524	4	84	17	164
691	0.0004749	11	111	18	211
692	0.0005765	5	94	14	183
693	0.000463	7	104	17	201
694	0.0004531	11	100	15	189
695	0.0004578	16	108	17	200
696	0.0004745	22	102	19	182
697	0.0004655	25	128	17	231
698	0.0004908	37	121	19	205
699	0.0004826	3	87	15	171
700	0.0003461	21	105	17	189
701	0.0003591	0	107	17	214
702	0.0004715	13	103	19	193
703	0.000461	5	99	19	193
704	0.0004636	6	94	19	182
705	0.0004842	46	124	17	202
706	0.0005348	86	156	17	226
707	0.0004883	5	100	17	195
708	0.0004819	21	107	16	193
709	0.0004607	0	100	19	200
710	0.0004801	22	96	15	170
711	0.0004604	6	97	17	188
712	0.0004627	9	96	15	183
713	0.0004649	29	115	16	201
714	0.0004882	41	127	17	213
715	0.0004753	26	119	16	212
716	0.0003627	1	103	15	205
717	0.0004655	18	100	18	182
718	0.000345	1	94	15	187
719	0.0004475	2	96	18	190
720	0.0005046	22	120	14	218
721	0.0004851	12	110	16	208
722	0.0004754	19	104	17	189
723	0.0005176	27	120	18	213
724	0.0004483	9	91	17	173
725	0.000465	31	119	17	207
726	0.0004514	18	108	17	198
727	0.0004674	21	91	17	161
728	0.0005159	11	111	19	211
729	0.0004699	42	112	15	182
730	0.0004533	8	80	19	152
731	0.0004699	29	122	19	215
732	0.000467	13	121	19	229
733	0.0004503	14	99	19	184
734	0.0004788	38	111	19	184
735	0.00051	6	91	19	176
736	0.0004998	51	131	17	211
737	0.000449	22	104	19	186
738	0.0004747	37	119	17	201
739	0.0004768	4	97	18	190
740	0.0004783	12	108	18	204
741	0.000499	11	116	16	221
742	0.0005302	41	129	19	217
743	0.0004841	5	105	15	205
744	0.0004729	29	116	16	203
745	0.0004971	44	132	18	220
746	0.0003688	11	94	16	177
747	0.0005311	10	106	16	202
748	0.0005148	4	96	16	188
749	0.0004878	45	125	18	205
750	0.0004822	34	119	17	204
751	0.0003489	4	94	17	184
752	0.0003583	7	101	18	195
753	0.00046	9	102	16	195
754	0.0004634	15	100	19	185
755	0.0004754	20	107	15	194
756	0.0005272	25	103	19	181
757	0.0004977	34	130	18	226
758	0.0004856	9	95	19	181
759	0.0004532	37	121	14	205
760	0.0004603	51	118	17	185
761	0.0003725	2	98	17	194
762	0.0004526	17	100	19	183
763	0.0004833	12	106	16	200
764	0.000507	11	101	16	191
765	0.0004686	17	109	16	201
766	0.0004695	15	112	18	209
767	0.0004706	38	125	19	212
768	0.0004606	7	111	18	215
769	0.0004507	19	105	18	191
770	0.0004477	10	98	15	186
771	0.0004606	13	102	17	191
772	0.0004622	16	100	19	184
773	0.0006183	19	110	19	201
774	0.0005081	40	124	17	208
775	0.0004759	26	121	17	216
776	0.0003726	8	102	16	196
777	0.0004635	39	124	17	209
778	0.0004516	29	101	17	173
779	0.0004676	27	113	14	199
780	0.0004727	29	104	18	179
781	0.0003798	12	82	15	152
782	0.0004836	28	119	16	210
783	0.0004885	36	115	18	194
784	0.0004563	16	110	18	204
785	0.0004597	16	102	19	188
786	0.0004469	18	97	14	176
787	0.0004535	13	102	14	191
788	0.0005322	7	97	18	187
789	0.0005781	4	97	17	190
790	0.0004531	2	100	19	198
791	0.0004948	18	108	16	198
792	0.0004923	48	137	18	226
793	0.0004414	0	99	19	198
794	0.0003611	1	98	19	195
795	0.0004558	12	106	17	200
796	0.0005204	53	128	19	203
797	0.0005361	6	99	18	192
798	0.0005654	15	104	15	193
799	0.0003316	3	84	16	165
800	0.0004706	1	96	16	191
801	0.0004493	1	105	19	209
802	0.000357	1	88	16	175
803	0.0004808	27	109	18	191
804	0.0003391	4	102	16	200
805	0.0003831	4	91	14	178
806	0.0004806	16	113	17	210
807	0.0005572	16	120	19	224
808	0.0004626	7	100	16	193
809	0.0004669	7	98	19	189
810	0.0005213	24	132	17	240
811	0.0004616	10	106	19	202
812	0.0004624	10	108	19	206
813	0.0005452	12	108	16	204
814	0.0004525	18	119	19	220
815	0.0004637	34	125	17	216
816	0.0003455	10	105	15	200
817	0.0004804	6	93	18	180
818	0.0005157	12	110	16	208
819	0.000492	22	107	18	192
820	0.0004875	28	108	15	188
821	0.0004763	37	126	16	215
822	0.0004669	5	103	19	201
823	0.0003516	7	101	18	195
824	0.0004686	8	109	16	210
825	0.000483	2	98	19	194
826	0.0003741	5	78	16	151
827	0.0004789	20	113	19	206
828	0.0004844	40	125	17	210
829	0.0004814	21	106	18	191
830	0.0004851	17	129	18	241
831	0.0004835	29	124	19	219
832	0.0004561	3	101	19	199
833	0.000471	2	103	18	204
834	0.000482	24	109	19	194
835	0.0006076	14	115	19	216
836	0.0005786	17	105	14	193
837	0.0004636	36	113	17	190
838	0.0005546	12	105	18	198
839	0.0005763	23	115	15	207
840	0.0004626	7	110	17	213
841	0.000545	26	109	18	192
842	0.0004769	31	100	19	169
843	0.0004884	25	108	19	191
844	0.0003412	10	86	13	162
845	0.0004752	6	104	16	202
846	0.0004843	27	117	15	207
847	0.0004949	36	119	19	202
848	0.0004789	16	107	19	198
849	0.0004953	16	123	16	230
850	0.0005018	1	106	19	211
851	0.0004554	33	106	15	179
852	0.0004839	5	101	18	197
853	0.0004765	13	112	19	211
854	0.0004639	36	119	19	202
855	0.0004917	81	146	19	211
856	0.0004435	10	88	15	166
857	0.0004572	6	98	19	190
858	0.0004861	1	105	15	209
859	0.0004646	3	99	15	195
860	0.0004859	44	113	19	182
861	0.0004604	30	115	18	200
862	0.0004617	10	104	19	198
863	0.0004556	4	99	19	194
864	0.0003404	6	101	17	196
865	0.0004589	5	94	15	183
866	0.000479	15	116	19	217
867	0.0004919	27	117	17	207
868	0.0004676	15	115	18	215
869	0.0004624	23	122	18	221
870	0.0005062	93	165	17	237
871	0.0004898	37	115	17	193
872	0.0004699	2	108	18	214
873	0.0005929	2	110	18	218
874	0.000466	1	96	16	191
875	0.0004604	10	104	18	198
876	0.0004679	38	119	19	200
877	0.0004524	27	108	19	189
878	0.0004568	17	94	15	171
879	0.00047	21	120	18	219
880	0.0004589	17	113	18	209
881	0.0004524	8	101	19	194
882	0.0004218	3	90	17	177
883	0.0005088	17	98	15	179
884	0.0004869	7	98	17	189
885	0.000484	38	113	16	188
886	0.0004623	61	127	19	193
887	0.0003806	5	94	16	183
888	0.0005747	41	109	19	177
889	0.000519	7	100	18	193
890	0.0004471	3	96	17	189
891	0.0006034	11	105	15	199
892	0.000345	4	94	18	184
893	0.0005301	34	116	16	198
894	0.0004827	5	104	18	203
895	0.0004594	9	99	18	189
896	0.0004653	11	108	16	205
897	0.000473	20	100	16	180
898	0.0005019	12	101	16	190
899	0.0004657	15	109	16	203
900	0.0004593	6	95	16	184
901	0.0003743	3	98	17	193
902	0.0004773	10	106	18	202
903	0.0004889	30	117	18	204
904	0.0004877	16	111	17	206
905	0.0005417	19	108	18	197
906	0.0004597	20	103	19	186
907	0.0005126	0	96	16	192
908	0.000366	0	81	16	162
909	0.0004786	2	92	19	182
910	0.0004656	21	130	18	239
911	0.0005025	10	96	18	182
912	0.0004849	4	122	19	240
913	0.0004941	28	106	17	184
914	0.0004729	9	125	19	241
915	0.0004898	26	99	18	172
916	0.000461	1	101	18	201
917	0.0004596	12	110	18	208
918	0.0004644	15	103	19	191
919	0.0005484	34	127	17	220
920	0.0005129	29	125	18	221
921	0.000477	27	125	18	223
922	0.0004706	11	104	16	197
923	0.0003746	18	93	14	168
924	0.0004708	35	121	18	207
925	0.0003512	2	92	17	182
926	0.0004986	2	98	17	194
927	0.0004901	8	110	17	212
928	0.0003709	5	102	16	199
929	0.0004553	3	80	13	157
930	0.0004727	43	129	17	215
931	0.0004989	5	103	18	201
932	0.0005098	3	95	15	187
933	0.0004711	20	96	17	172
934	0.0004665	19	107	16	195
935	0.000364	2	103	15	204
936	0.0005642	6	91	18	176
937	0.0004822	18	109	18	200
938	0.0004806	34	109	18	184
939	0.0004705	31	108	14	185
940	0.0004631	13	104	16	195
941	0.0003353	5	87	13	169
942	0.0005004	26	115	19	204
943	0.0005324	6	104	17	202
944	0.0003489	5	97	18	189
945	0.0005017	6	104	17	202
946	0.0004942	53	119	17	185
947	0.0004826	5	115	17	225
948	0.0003014	3	87	12	171
949	0.000477	19	99	19	179
950	0.0004723	11	98	17	185
951	0.0004937	22	110	19	198
952	0.0004847	7	107	17	207
953	0.0004627	20	106	18	192
954	0.0004832	3	93	17	183
955	0.0004909	10	116	19	222
956	0.000449	24	100	16	176
957	0.0004591	26	116	18	206
958	0.0004586	9	98	19	187
959	0.000474	29	119	18	209
960	0.0005376	12	121	19	230
961	0.0004526	8	98	18	188
962	0.0004502	7	106	18	205
963	0.0005192	5	87	16	169
964	0.0003774	5	100	17	195
965	0.0004595	39	102	16	165
966	0.0004658	25	106	16	187
967	0.0004792	19	102	15	185
968	0.0004703	71	135	16	199
969	0.0004594	3	93	15	183
970	0.0003561	3	107	18	211
971	0.0005117	9	107	16	205
972	0.0005223	10	110	19	210
973	0.0004766	28	104	19	180
974	0.0004589	3	109	19	215
975	0.0004713	18	122	16	226
976	0.0004793	32	119	18	206
977	0.0004843	30	111	19	192
978	0.0004574	16	97	19	178
979	0.0004642	3	108	19	213
980	0.0003714	4	101	17	198
981	0.0005506	23	96	19	169
982	0.0004934	29	120	16	211
983	0.0005629	26	115	17	204
984	0.0005584	37	102	18	167
985	0.000474	44	133	19	222
986	0.0003548	3	98	18	193
987	0.0004779	10	115	16	220
988	0.0004807	31	115	18	199
989	0.0004538	11	101	18	191
990	0.0005017	28	118	17	208
991	0.0005851	14	121	15	228
992	0.0004571	17	113	19	209
993	0.0004741	10	103	18	196
994	0.0004778	9	102	18	195
995	0.0004909	17	107	19	197
996	0.0004693	7	101	16	195
997	0.0004537	10	110	17	210
998	0.0004667	8	106	19	204
999	0.0004751	31	140	18	249
mean	0.000466935	17.07	107.076	17.205	197.082

## Sheet: PowerBalance_Bal
	time	SEq	Bal	Reg	Egal
0	0.0005114	4	94	17	184
1	0.0004432	4	100	17	196
2	0.0004928	21	94	13	167
3	0.0004844	23	109	17	195
4	0.0004946	1	103	19	205
5	0.0003585	1	102	16	203
6	0.0005019	20	119	19	218
7	0.0004825	8	110	16	212
8	0.0004685	32	117	19	202
9	0.0004522	34	114	17	194
10	0.0005087	80	151	19	222
11	0.0004725	39	129	16	219
12	0.0004595	29	101	18	173
13	0.000385	14	92	17	170
14	0.0004599	14	107	17	200
15	0.0005035	36	131	18	226
16	0.0005231	75	124	18	173
17	0.0004752	4	84	19	164
18	0.0004819	9	105	17	201
19	0.0004641	22	102	17	182
20	0.0005225	0	99	19	198
21	0.0004586	2	109	18	216
22	0.000462	2	102	17	202
23	0.0005384	40	124	18	208
24	0.0004713	27	119	19	211
25	0.0004922	11	113	17	215
26	0.0003708	3	90	18	177
27	0.0004687	4	104	17	204
28	0.0004664	32	116	18	200
29	0.0004721	20	125	18	230
30	0.0004636	7	104	19	201
31	0.0004666	23	117	17	211
32	0.0003679	12	107	18	202
33	0.0004506	22	92	14	162
34	0.0003609	18	110	17	202
35	0.0004586	35	94	17	153
36	0.0004783	13	115	16	217
37	0.000478	20	106	18	192
38	0.0005422	2	102	19	202
39	0.0004791	4	97	18	190
40	0.0004628	15	125	19	235
41	0.0003459	10	91	15	172
42	0.0004737	0	98	19	196
43	0.0004891	61	139	19	217
44	0.0004519	1	108	18	215
45	0.0003504	1	83	15	165
46	0.000484	24	91	13	158
47	0.0005163	15	111	19	207
48	0.0005134	12	108	16	204
49	0.0003752	2	121	17	240
50	0.0004712	50	120	17	190
51	0.000478	15	110	18	205
52	0.0003444	6	89	13	172
53	0.0004438	11	109	19	207
54	0.0004676	16	108	19	200
55	0.0003576	7	97	15	187
56	0.0004772	18	117	17	216
57	0.0005039	3	115	16	227
58	0.0003835	14	97	16	180
59	0.0005434	1	109	18	217
60	0.0004704	49	120	17	191
61	0.0004745	8	116	17	224
62	0.0003574	19	96	19	173
63	0.0004482	14	99	15	184
64	0.0004881	1	112	18	223
65	0.0004554	15	99	19	183
66	0.0004405	9	103	18	197
67	0.0004637	10	94	18	178
68	0.0004415	19	108	14	197
69	0.0004698	28	111	16	194
70	0.0004639	7	103	19	199
71	0.000572	58	132	17	206
72	0.0004531	4	107	19	210
73	0.0004602	16	104	13	192
74	0.0004597	18	103	19	188
75	0.0004707	44	107	17	170
76	0.0003554	6	99	19	192
77	0.0003578	8	85	18	162
78	0.000498	4	97	19	190
79	0.0004387	22	105	17	188
80	0.0004627	4	90	15	176
81	0.0004499	12	96	17	180
82	0.0004486	29	109	17	189
83	0.0004499	42	107	14	172
84	0.0004791	3	100	15	197
85	0.0004942	1	88	18	175
86	0.0004477	9	103	19	197
87	0.0004723	4	100	18	196
88	0.0004925	23	118	18	213
89	0.0004913	15	115	18	215
90	0.0004923	1	103	19	205
91	0.0004952	16	107	15	198
92	0.0005016	31	108	18	185
93	0.0004661	17	105	18	193
94	0.000354	2	99	19	196
95	0.0003355	9	88	14	167
96	0.0003712	4	105	16	206
97	0.0004739	21	116	17	211
98	0.0003476	3	94	13	185
99	0.0004779	15	95	13	175
100	0.0004814	28	107	19	186
101	0.000669	7	101	19	195
102	0.0004729	1	94	19	187
103	0.0004634	10	107	19	204
104	0.000463	20	99	16	178
105	0.0004735	38	110	17	182
106	0.0004877	27	109	19	191
107	0.0004691	44	112	17	180
108	0.0007998	34	111	19	188
109	0.0003354	7	98	18	189
110	0.0004555	16	104	15	192
111	0.0004786	15	105	19	195
112	0.0004591	21	101	18	181
113	0.0005059	59	131	18	203
114	0.0004606	16	111	17	206
115	0.0004752	3	103	19	203
116	0.0004834	43	132	17	221
117	0.0003445	0	94	19	188
118	0.0004704	18	112	15	206
119	0.000483	16	101	16	186
120	0.0004104	14	91	17	168
121	0.0004903	2	112	17	222
122	0.0004792	31	96	18	161
123	0.0004993	44	122	17	200
124	0.0004609	5	108	18	211
125	0.0004869	62	128	15	194
126	0.0004571	17	112	19	207
127	0.0005137	30	117	15	204
128	0.0004571	22	112	17	202
129	0.0004979	3	116	16	229
130	0.0004836	2	107	15	212
131	0.0004814	56	125	16	194
132	0.0004416	12	95	17	178
133	0.0005665	31	124	19	217
134	0.0004641	37	118	14	199
135	0.000474	41	115	15	189
136	0.0004565	10	112	19	214
137	0.0004726	1	106	18	211
138	0.0004566	20	111	18	202
139	0.0005317	19	113	15	207
140	0.000491	6	107	16	208
141	0.0005103	40	132	18	224
142	0.0004747	32	117	18	202
143	0.0005121	1	105	18	209
144	0.0004917	2	77	17	152
145	0.0004625	6	109	19	212
146	0.0003868	5	94	17	183
147	0.0005437	11	109	17	207
148	0.0004646	1	101	18	201
149	0.0003735	2	90	18	178
150	0.0005025	16	121	17	226
151	0.0004778	20	113	19	206
152	0.0004434	25	105	19	185
153	0.0004657	32	104	17	176
154	0.0005181	7	106	19	205
155	0.0004585	9	101	18	193
156	0.0004605	2	96	18	190
157	0.0004818	5	101	18	197
158	0.0003507	1	94	19	187
159	0.0003496	3	98	18	193
160	0.0004463	18	100	15	182
161	0.0003522	0	95	18	190
162	0.0003252	12	93	13	174
163	0.0004581	16	100	15	184
164	0.0004587	5	110	17	215
165	0.0004977	7	100	15	193
166	0.0003591	1	111	13	221
167	0.0005157	24	119	16	214
168	0.0004518	5	78	16	151
169	0.0005195	14	110	15	206
170	0.0004629	13	87	15	161
171	0.0005447	8	99	19	190
172	0.0004847	39	126	17	213
173	0.0004678	12	105	15	198
174	0.0003408	3	90	18	177
175	0.0004723	4	94	17	184
176	0.0004581	25	109	17	193
177	0.0004928	13	109	18	205
178	0.0003576	5	87	15	169
179	0.0003801	5	103	16	201
180	0.0005207	24	121	17	218
181	0.0005412	5	96	17	187
182	0.0004614	36	116	18	196
183	0.0004584	9	99	19	189
184	0.0005698	5	108	18	211
185	0.0004563	11	89	17	167
186	0.0004656	23	106	17	189
187	0.0004464	14	113	17	212
188	0.0004605	22	122	18	222
189	0.0004451	18	104	15	190
190	0.0003509	2	101	17	200
191	0.00049	26	129	18	232
192	0.0003845	1	100	15	199
193	0.0004615	35	124	19	213
194	0.0004624	15	121	17	227
195	0.0004686	37	112	18	187
196	0.0004867	14	114	18	214
197	0.0003549	29	102	13	175
198	0.0004491	8	96	18	184
199	0.0004649	32	121	19	210
200	0.0004831	31	122	19	213
201	0.000478	4	95	18	186
202	0.0004698	25	105	16	185
203	0.0004606	42	109	17	176
204	0.0004622	15	107	18	199
205	0.0005017	6	109	19	212
206	0.00052	4	100	16	196
207	0.000467	10	116	17	222
208	0.0004014	2	107	16	212
209	0.000459	31	106	19	181
210	0.0004589	1	101	16	201
211	0.0004806	1	99	17	197
212	0.0004669	3	100	15	197
213	0.000463	5	84	14	163
214	0.0004682	14	111	19	208
215	0.0005098	10	103	17	196
216	0.000522	12	110	18	208
217	0.0004808	24	113	19	202
218	0.0004657	14	105	19	196
219	0.0004749	28	99	15	170
220	0.0004629	7	103	17	199
221	0.0004895	33	119	18	205
222	0.0004792	10	93	18	176
223	0.0004792	1	91	17	181
224	0.0004986	17	108	19	199
225	0.0004631	17	105	16	193
226	0.0004616	14	115	19	216
227	0.0005547	4	113	16	222
228	0.0004658	37	113	16	189
229	0.0005129	3	93	15	183
230	0.0003475	10	99	16	188
231	0.0003568	3	87	18	171
232	0.0004664	17	108	18	199
233	0.0004823	18	106	19	194
234	0.0004979	32	118	16	204
235	0.000474	9	99	19	189
236	0.000529	40	126	19	212
237	0.0004611	14	106	19	198
238	0.0004555	10	94	17	178
239	0.0005558	6	96	19	186
240	0.0004957	0	94	18	188
241	0.0005174	9	105	19	201
242	0.0004409	11	85	17	159
243	0.0004762	25	109	16	193
244	0.0004999	15	107	18	199
245	0.0004712	36	108	17	180
246	0.0003402	5	77	17	149
247	0.0004967	4	111	18	218
248	0.0005306	14	91	18	168
249	0.0005812	56	126	15	196
250	0.0005015	6	104	16	202
251	0.0004846	67	138	17	209
252	0.0005045	23	108	17	193
253	0.0004657	37	106	18	175
254	0.0005003	3	107	14	211
255	0.0005062	14	110	17	206
256	0.0005202	0	109	18	218
257	0.0004724	11	98	14	185
258	0.0005256	19	104	18	189
259	0.0004482	16	94	17	172
260	0.0004672	16	107	16	198
261	0.0004882	5	112	17	219
262	0.0004738	24	115	19	206
263	0.0004889	14	117	18	220
264	0.0004524	8	102	14	196
265	0.0004677	24	125	19	226
266	0.0005151	9	117	17	225
267	0.0004463	24	98	18	172
268	0.000596	1	113	19	225
269	0.0004622	35	107	16	179
270	0.0003471	3	97	18	191
271	0.0005123	20	104	14	188
272	0.0004753	40	117	19	194
273	0.0005145	15	110	19	205
274	0.0005022	17	114	17	211
275	0.0004752	5	81	18	157
276	0.000475	36	116	17	196
277	0.000615	27	102	19	177
278	0.0004887	13	110	19	207
279	0.0004654	11	99	17	187
280	0.0004548	13	100	15	187
281	0.000469	9	106	16	203
282	0.0004661	15	107	17	199
283	0.0004457	43	111	12	179
284	0.0003884	22	100	16	178
285	0.0004582	27	107	16	187
286	0.0004605	9	106	18	203
287	0.0005039	6	90	19	174
288	0.0004749	8	112	15	216
289	0.000488	39	118	19	197
290	0.0004628	4	83	14	162
291	0.0004956	10	106	18	202
292	0.0004798	3	96	19	189
293	0.0004793	9	90	17	171
294	0.0004879	69	136	19	203
295	0.0004796	4	105	19	206
296	0.0005165	14	108	19	202
297	0.0004932	20	101	18	182
298	0.0004673	14	96	19	178
299	0.0004946	33	109	17	185
300	0.0004873	13	114	17	215
301	0.0004664	40	117	18	194
302	0.0003645	16	107	16	198
303	0.000443	2	94	17	186
304	0.0004665	28	102	19	176
305	0.0003614	4	80	15	156
306	0.0005242	0	96	19	192
307	0.0004699	17	108	18	199
308	0.0004573	9	103	19	197
309	0.0003412	0	93	18	186
310	0.0005205	3	83	19	163
311	0.0004658	18	109	18	200
312	0.0004547	2	102	19	202
313	0.0004534	14	119	18	224
314	0.0003209	2	90	17	178
315	0.0004755	3	104	18	205
316	0.0004993	25	103	14	181
317	0.0005554	4	95	18	186
318	0.0003486	2	90	19	178
319	0.0004625	1	103	17	205
320	0.0004817	23	103	15	183
321	0.0004706	32	108	18	184
322	0.0004638	2	106	19	210
323	0.0004847	6	84	17	162
324	0.0004637	6	97	16	188
325	0.0004667	24	104	13	184
326	0.0005027	19	103	18	187
327	0.000472	25	113	18	201
328	0.0004771	39	120	19	201
329	0.0004887	48	116	18	184
330	0.0004781	4	97	19	190
331	0.0003314	1	90	15	179
332	0.0004847	27	104	15	181
333	0.000475	14	106	18	198
334	0.0004878	64	126	18	188
335	0.0005685	5	109	18	213
336	0.00051	42	124	19	206
337	0.0005354	31	131	17	231
338	0.0005326	15	103	17	191
339	0.0004649	29	125	17	221
340	0.0005038	8	109	19	210
341	0.0004659	1	97	19	193
342	0.0004745	5	97	15	189
343	0.0003893	3	104	19	205
344	0.0003523	14	100	17	186
345	0.00045	66	122	19	178
346	0.0005435	15	89	15	163
347	0.0004689	9	102	18	195
348	0.0005088	41	115	17	189
349	0.0004625	21	109	18	197
350	0.0004692	24	120	19	216
351	0.0005034	66	123	18	180
352	0.000468	3	101	18	199
353	0.0005319	50	136	19	222
354	0.0005249	29	101	18	173
355	0.0004793	40	123	18	206
356	0.0003414	4	104	17	204
357	0.0004468	9	84	15	159
358	0.0004875	9	92	19	175
359	0.0004883	36	121	17	206
360	0.0004827	65	131	18	197
361	0.0003795	1	85	15	169
362	0.0005032	32	121	19	210
363	0.0004545	8	90	13	172
364	0.0005169	33	113	18	193
365	0.0004852	8	105	19	202
366	0.000465	23	123	19	223
367	0.0004955	10	109	14	208
368	0.0003451	7	82	18	157
369	0.0004481	5	92	19	179
370	0.000453	10	98	15	186
371	0.0004624	6	110	17	214
372	0.0004938	22	105	18	188
373	0.000343	6	90	19	174
374	0.000328	3	87	17	171
375	0.0004446	16	97	17	178
376	0.0004617	23	107	19	191
377	0.000435	17	90	19	163
378	0.0004411	6	94	18	182
379	0.0004893	11	113	17	215
380	0.0005008	4	99	17	194
381	0.0004425	15	115	19	215
382	0.000449	5	110	19	215
383	0.0005098	22	111	18	200
384	0.0004656	35	110	15	185
385	0.0004618	8	111	19	214
386	0.0004559	16	105	18	194
387	0.0004872	41	130	18	219
388	0.0004788	14	113	19	212
389	0.0005025	37	117	12	197
390	0.0004582	1	105	15	209
391	0.0004852	6	129	19	252
392	0.0005716	5	115	19	225
393	0.0003582	1	104	19	207
394	0.0005103	20	102	18	184
395	0.0004569	18	107	19	196
396	0.0005272	61	135	17	209
397	0.0004222	24	101	17	178
398	0.0005247	21	108	16	195
399	0.0005032	83	150	17	217
400	0.0004909	14	101	18	188
401	0.0004855	1	105	18	209
402	0.0003391	4	81	18	158
403	0.000357	8	109	17	210
404	0.0004731	33	120	19	207
405	0.0003649	13	98	18	183
406	0.0004675	13	124	18	235
407	0.0003311	0	95	15	190
408	0.0004559	2	100	16	198
409	0.0004692	16	105	18	194
410	0.0004806	6	118	17	230
411	0.0003441	17	98	17	179
412	0.0004945	4	97	17	190
413	0.0004706	28	123	19	218
414	0.000817	29	95	16	161
415	0.0005293	6	105	17	204
416	0.0004771	8	98	15	188
417	0.0005005	57	134	19	211
418	0.0004581	16	100	16	184
419	0.0004569	17	100	17	183
420	0.0005385	28	121	18	214
421	0.0004527	2	98	17	194
422	0.0004602	1	92	16	183
423	0.0003433	10	96	13	182
424	0.0004903	19	113	19	207
425	0.0005036	25	122	16	219
426	0.0004555	21	99	19	177
427	0.0005285	4	84	15	164
428	0.0004776	12	111	17	210
429	0.0004612	26	116	19	206
430	0.000473	17	117	18	217
431	0.0004778	14	115	18	216
432	0.0004883	28	110	15	192
433	0.0003494	4	105	17	206
434	0.0004632	13	102	18	191
435	0.0003537	2	90	18	178
436	0.0004902	22	130	19	238
437	0.0003536	1	91	16	181
438	0.0004884	47	126	15	205
439	0.0004717	13	108	17	203
440	0.0005301	4	102	16	200
441	0.0003614	8	98	17	188
442	0.0004812	15	111	18	207
443	0.0004962	10	110	19	210
444	0.0004921	7	111	18	215
445	0.0004859	44	127	18	210
446	0.0004539	21	111	18	201
447	0.0004647	3	96	16	189
448	0.0004533	25	109	19	193
449	0.0004751	10	102	19	194
450	0.000491	8	104	19	200
451	0.0004448	22	100	15	178
452	0.0003567	5	91	15	177
453	0.0004787	21	118	19	215
454	0.0004731	22	108	19	194
455	0.0004628	17	102	19	187
456	0.0004816	26	119	19	212
457	0.0004628	39	123	16	207
458	0.0004569	12	93	19	174
459	0.0005285	59	145	18	231
460	0.0003828	4	112	18	220
461	0.000503	4	111	18	218
462	0.0004887	5	108	15	211
463	0.0003611	9	109	16	209
464	0.0004569	14	110	16	206
465	0.0005414	8	115	19	222
466	0.0004537	7	93	17	179
467	0.0003469	17	92	15	167
468	0.0005267	34	116	17	198
469	0.0004604	30	114	15	198
470	0.0004712	35	114	16	193
471	0.0004795	19	111	18	203
472	0.0004535	21	102	19	183
473	0.0005079	40	122	17	204
474	0.0003726	2	109	18	216
475	0.0004868	16	104	17	192
476	0.0004993	2	77	12	152
477	0.0004973	31	122	16	213
478	0.0003608	2	91	14	180
479	0.0005027	12	103	14	194
480	0.0004496	12	100	16	188
481	0.000478	49	120	17	191
482	0.0005157	6	104	19	202
483	0.0004792	9	110	19	211
484	0.0005264	22	96	18	170
485	0.0003381	14	93	19	172
486	0.0004592	8	116	19	224
487	0.0005157	35	126	16	217
488	0.0004725	2	95	19	188
489	0.0003607	12	110	16	208
490	0.0004838	2	107	17	212
491	0.000491	15	106	16	197
492	0.0004625	15	113	18	211
493	0.0005082	54	121	16	188
494	0.000514	4	99	18	194
495	0.0004917	44	131	19	218
496	0.0004522	8	107	17	206
497	0.0003563	10	98	18	186
498	0.0003571	3	93	14	183
499	0.0004525	4	106	18	208
500	0.0004558	10	95	16	180
501	0.0004719	27	109	15	191
502	0.0004749	1	99	18	197
503	0.0005428	4	103	14	202
504	0.0004764	6	102	15	198
505	0.0004876	37	126	19	215
506	0.0004632	11	113	14	215
507	0.0004596	5	120	19	235
508	0.000351	9	89	17	169
509	0.0004608	8	106	17	204
510	0.0005267	12	113	19	214
511	0.0003455	1	88	16	175
512	0.0004633	20	111	19	202
513	0.0004821	7	98	19	189
514	0.0003593	9	99	14	189
515	0.0004612	6	95	14	184
516	0.0004611	10	109	18	208
517	0.0004514	14	96	18	178
518	0.0004747	33	115	18	197
519	0.0003403	4	91	19	178
520	0.0004733	1	99	19	197
521	0.0004634	18	109	15	200
522	0.0004923	17	108	19	199
523	0.0004536	10	107	17	204
524	0.0004704	14	103	16	192
525	0.0004747	27	103	17	179
526	0.0003682	5	113	16	221
527	0.0004591	2	87	15	172
528	0.0003341	0	87	13	174
529	0.0004538	4	95	18	186
530	0.0005704	31	110	17	189
531	0.0004635	6	108	18	210
532	0.0005261	48	120	17	192
533	0.0003481	1	80	15	159
534	0.0004683	17	118	17	219
535	0.0004855	51	121	19	191
536	0.0005016	8	110	19	212
537	0.0004612	7	101	19	195
538	0.0004689	2	99	15	196
539	0.0003475	3	99	14	195
540	0.0004949	34	127	17	220
541	0.0005115	5	112	17	219
542	0.0005133	17	100	15	183
543	0.0004538	22	112	18	202
544	0.0004694	16	98	18	180
545	0.0004695	16	120	18	224
546	0.0004811	1	106	14	211
547	0.0004863	14	103	19	192
548	0.0004893	28	120	15	212
549	0.0004648	15	110	15	205
550	0.0005073	70	137	17	204
551	0.0004888	26	105	17	184
552	0.0004673	4	103	19	202
553	0.000347	3	91	18	179
554	0.0004819	9	102	18	195
555	0.0003636	1	106	15	211
556	0.0005883	12	112	16	212
557	0.00046	16	111	18	206
558	0.0004708	19	111	19	203
559	0.0004596	39	115	17	191
560	0.0004757	61	140	16	219
561	0.0004831	14	97	18	180
562	0.0003298	11	99	18	187
563	0.0005084	18	101	16	184
564	0.000455	1	96	18	191
565	0.0004913	59	131	18	203
566	0.0004961	3	104	18	205
567	0.0004619	42	119	13	196
568	0.0004542	15	101	16	187
569	0.0004857	11	94	18	177
570	0.0004506	32	111	18	190
571	0.0003481	3	89	17	175
572	0.0003499	9	109	15	209
573	0.0004956	0	120	17	240
574	0.0004617	2	103	17	204
575	0.0004649	21	100	17	179
576	0.0003601	13	107	14	201
577	0.0004804	19	118	18	217
578	0.0004796	16	106	15	196
579	0.0005038	0	114	16	228
580	0.0004621	47	126	19	205
581	0.0004679	16	114	17	212
582	0.0005094	34	123	17	212
583	0.0004714	13	110	19	207
584	0.0005072	15	101	18	187
585	0.0004601	28	107	16	186
586	0.0004926	15	119	17	223
587	0.000501	4	108	18	212
588	0.0005452	19	108	19	197
589	0.0004564	18	102	14	186
590	0.0004656	0	91	19	182
591	0.0004606	16	102	14	188
592	0.000456	2	107	19	212
593	0.0004754	12	118	18	224
594	0.0004639	8	101	18	194
595	0.000486	60	129	16	198
596	0.0004726	41	120	19	199
597	0.0004679	6	111	18	216
598	0.0005376	72	123	17	174
599	0.000509	15	106	15	197
600	0.0004608	36	109	19	182
601	0.0004955	4	101	18	198
602	0.0004512	15	104	19	193
603	0.0004596	14	102	15	190
604	0.0004775	24	114	19	204
605	0.0003492	19	107	18	195
606	0.0004679	34	124	18	214
607	0.0004556	5	113	16	221
608	0.0004523	23	106	17	189
609	0.000515	22	122	18	222
610	0.0003499	7	100	16	193
611	0.0005016	16	114	18	212
612	0.0003643	3	98	16	193
613	0.0005304	55	135	19	215
614	0.0004468	2	93	17	184
615	0.0006544	51	118	18	185
616	0.0004821	5	109	17	213
617	0.0004801	2	102	18	202
618	0.0005019	10	92	14	174
619	0.000463	16	94	15	172
620	0.0005136	6	107	16	208
621	0.0004712	51	121	15	191
622	0.0004846	12	114	15	216
623	0.0005266	9	112	19	215
624	0.0003378	2	92	15	182
625	0.0004745	37	125	16	213
626	0.0004723	30	115	18	200
627	0.0004713	5	94	17	183
628	0.0005013	33	110	17	187
629	0.0004956	5	106	17	207
630	0.0005327	13	115	19	217
631	0.0005264	10	114	18	218
632	0.0004543	5	108	15	211
633	0.0003374	8	89	15	170
634	0.0005503	2	105	19	208
635	0.000344	2	96	16	190
636	0.0004785	20	114	18	208
637	0.0004765	17	109	16	201
638	0.0003635	20	92	17	164
639	0.0004681	5	105	19	205
640	0.0004817	14	105	16	196
641	0.0004466	8	102	17	196
642	0.0004655	32	102	19	172
643	0.0004886	17	118	19	219
644	0.0004496	10	106	17	202
645	0.0004783	36	123	19	210
646	0.0004539	2	103	17	204
647	0.0004635	32	114	15	196
648	0.000462	19	91	17	163
649	0.000467	25	103	14	181
650	0.0004731	32	111	16	190
651	0.0004686	18	114	19	210
652	0.0005759	12	120	18	228
653	0.0005213	30	107	17	184
654	0.0004828	27	103	19	179
655	0.0005295	79	142	18	205
656	0.0004318	25	100	13	175
657	0.000477	48	111	17	174
658	0.0005185	18	114	17	210
659	0.0004518	4	94	16	184
660	0.0005332	19	102	16	185
661	0.000474	20	117	18	214
662	0.0004603	6	100	15	194
663	0.0005328	22	111	17	200
664	0.0004836	29	131	18	233
665	0.0003476	1	100	18	199
666	0.0003521	6	110	17	214
667	0.0004942	2	88	17	174
668	0.0004532	16	106	13	196
669	0.0004702	21	110	17	199
670	0.0003564	2	90	16	178
671	0.0004847	4	115	19	226
672	0.0004093	20	103	16	186
673	0.0004591	17	113	19	209
674	0.0004581	22	104	15	186
675	0.0005087	7	103	16	199
676	0.0003531	8	108	17	208
677	0.0004499	7	95	19	183
678	0.0004904	17	116	19	215
679	0.0004944	11	114	19	217
680	0.0004795	15	108	16	201
681	0.0004869	15	123	17	231
682	0.0004969	41	130	17	219
683	0.0004843	28	120	17	212
684	0.0003489	5	95	16	185
685	0.00047	31	107	15	183
686	0.0005269	13	102	18	191
687	0.0004712	5	110	17	215
688	0.0004784	19	90	18	161
689	0.0005544	12	111	19	210
690	0.0004079	4	84	17	164
691	0.0004805	11	111	18	211
692	0.0004639	5	94	14	183
693	0.0004709	7	104	17	201
694	0.0004489	11	100	15	189
695	0.0004756	28	114	17	200
696	0.0004421	22	102	19	182
697	0.0004808	25	128	17	231
698	0.0005312	37	121	19	205
699	0.0004992	3	87	15	171
700	0.0003477	21	105	17	189
701	0.0003516	0	107	17	214
702	0.000472	13	103	19	193
703	0.0004819	5	99	19	193
704	0.0004736	6	94	19	182
705	0.0005229	46	124	17	202
706	0.0004932	86	156	17	226
707	0.0004813	5	100	17	195
708	0.0004582	21	107	16	193
709	0.0004765	0	100	19	200
710	0.000475	22	96	15	170
711	0.0005073	6	97	17	188
712	0.0004893	9	96	15	183
713	0.000504	29	115	16	201
714	0.0004778	41	127	17	213
715	0.0004742	29	113	17	197
716	0.0003609	1	103	15	205
717	0.0004481	18	100	18	182
718	0.0003457	1	94	15	187
719	0.0004514	2	96	18	190
720	0.0005131	22	120	14	218
721	0.0005446	12	110	16	208
722	0.0005104	19	104	17	189
723	0.0004879	27	120	18	213
724	0.0004498	9	91	17	173
725	0.0004611	31	119	17	207
726	0.0004512	18	108	17	198
727	0.0005275	21	91	17	161
728	0.0005173	24	111	16	198
729	0.00049	42	112	15	182
730	0.0004468	8	80	19	152
731	0.0004701	29	122	19	215
732	0.0005084	13	121	19	229
733	0.0004571	14	99	19	184
734	0.000483	38	111	19	184
735	0.0004504	6	91	19	176
736	0.0005031	51	131	17	211
737	0.0004527	22	104	19	186
738	0.0004756	37	119	17	201
739	0.0003521	4	97	18	190
740	0.0004782	12	108	18	204
741	0.0005439	11	116	16	221
742	0.0004715	41	129	19	217
743	0.0004708	5	105	15	205
744	0.0005643	29	116	16	203
745	0.0005013	44	132	18	220
746	0.0003362	11	94	16	177
747	0.000471	10	106	16	202
748	0.0004637	4	96	16	188
749	0.0005008	45	125	18	205
750	0.0004592	34	119	17	204
751	0.0003405	4	94	17	184
752	0.0003582	7	101	18	195
753	0.0004559	9	102	16	195
754	0.0004685	15	100	19	185
755	0.000468	20	107	15	194
756	0.0004707	25	103	19	181
757	0.000481	34	130	18	226
758	0.0005349	9	95	19	181
759	0.0004575	37	121	14	205
760	0.0004958	51	118	17	185
761	0.0003704	2	98	17	194
762	0.0004576	17	100	19	183
763	0.0004479	12	106	16	200
764	0.0004837	11	101	16	191
765	0.0004935	17	109	16	201
766	0.000519	15	112	18	209
767	0.0005395	38	125	19	212
768	0.0004679	7	111	18	215
769	0.0004886	19	105	18	191
770	0.0004729	10	98	15	186
771	0.0004771	13	102	17	191
772	0.0005037	16	100	19	184
773	0.0004706	19	110	19	201
774	0.0004956	40	124	17	208
775	0.0005002	26	121	17	216
776	0.0003515	8	102	16	196
777	0.0004717	39	124	17	209
778	0.0004524	29	101	17	173
779	0.0004603	27	113	14	199
780	0.0004618	29	104	18	179
781	0.0003775	12	82	15	152
782	0.000482	28	119	16	210
783	0.0004616	36	115	18	194
784	0.0004541	16	110	18	204
785	0.0004549	16	102	19	188
786	0.0004709	18	97	14	176
787	0.0004662	13	102	14	191
788	0.0004743	7	97	18	187
789	0.0004848	4	97	17	190
790	0.0004521	2	100	19	198
791	0.0005529	18	108	16	198
792	0.000496	48	137	18	226
793	0.0004371	0	99	19	198
794	0.0004426	1	98	19	195
795	0.0004453	12	106	17	200
796	0.0005043	70	125	14	180
797	0.0004789	6	99	18	192
798	0.000525	15	104	15	193
799	0.0003388	3	84	16	165
800	0.0004799	1	96	16	191
801	0.0004608	1	105	19	209
802	0.0003661	1	88	16	175
803	0.0004868	27	109	18	191
804	0.0003645	4	102	16	200
805	0.0003354	4	91	14	178
806	0.0004689	26	112	17	198
807	0.0004829	16	120	19	224
808	0.0004486	7	100	16	193
809	0.00046	7	98	19	189
810	0.0004937	31	126	15	221
811	0.0005397	10	106	19	202
812	0.0004635	10	108	19	206
813	0.0004935	12	108	16	204
814	0.000455	18	119	19	220
815	0.0005191	34	125	17	216
816	0.0003888	10	105	15	200
817	0.0004701	6	93	18	180
818	0.0004678	12	110	16	208
819	0.0004933	22	107	18	192
820	0.0005291	28	108	15	188
821	0.0004806	37	126	16	215
822	0.0004632	5	103	19	201
823	0.0003364	7	101	18	195
824	0.0003595	8	109	16	210
825	0.0004548	2	98	19	194
826	0.000358	5	78	16	151
827	0.0004559	23	112	16	201
828	0.0004702	40	125	17	210
829	0.0004892	21	106	18	191
830	0.0004816	17	129	18	241
831	0.0005109	29	124	19	219
832	0.0004741	3	101	19	199
833	0.0004856	2	103	18	204
834	0.000474	24	109	19	194
835	0.0005013	28	120	19	212
836	0.0004976	17	105	14	193
837	0.0004725	36	113	17	190
838	0.0004686	12	105	18	198
839	0.0004824	23	115	15	207
840	0.0004721	7	110	17	213
841	0.0004811	26	109	18	192
842	0.0005259	31	100	19	169
843	0.0004603	25	108	19	191
844	0.000344	10	86	13	162
845	0.0004555	6	104	16	202
846	0.0004767	27	117	15	207
847	0.0004542	36	119	19	202
848	0.0005668	16	107	19	198
849	0.0004674	16	123	16	230
850	0.0004648	1	106	19	211
851	0.0004781	33	106	15	179
852	0.0005534	5	101	18	197
853	0.0005057	13	112	19	211
854	0.0004643	38	118	17	198
855	0.0004963	81	146	19	211
856	0.0004452	10	88	15	166
857	0.0004548	6	98	19	190
858	0.0005168	1	105	15	209
859	0.0004613	3	99	15	195
860	0.0004677	44	113	19	182
861	0.0005159	30	115	18	200
862	0.0004593	10	104	19	198
863	0.000454	4	99	19	194
864	0.0003407	6	101	17	196
865	0.0004628	5	94	15	183
866	0.0004699	15	116	19	217
867	0.0004951	27	117	17	207
868	0.000683	15	115	18	215
869	0.0005089	23	122	18	221
870	0.0005124	93	165	17	237
871	0.0004732	37	115	17	193
872	0.0005011	2	108	18	214
873	0.000498	2	110	18	218
874	0.0004549	1	96	16	191
875	0.0004678	10	104	18	198
876	0.0004547	38	119	19	200
877	0.0004614	27	108	19	189
878	0.0004955	17	94	15	171
879	0.0004991	21	120	18	219
880	0.000455	17	113	18	209
881	0.0004513	8	101	19	194
882	0.0003395	3	90	17	177
883	0.0004597	17	98	15	179
884	0.0004838	7	98	17	189
885	0.0004739	38	113	16	188
886	0.0004578	61	127	19	193
887	0.000375	5	94	16	183
888	0.000491	41	109	19	177
889	0.0004606	7	100	18	193
890	0.0003491	3	96	17	189
891	0.0004669	11	105	15	199
892	0.0003536	4	94	18	184
893	0.0004608	34	116	16	198
894	0.0004608	5	104	18	203
895	0.000487	9	99	18	189
896	0.0004631	12	107	16	202
897	0.0004797	20	100	16	180
898	0.0005254	12	101	16	190
899	0.000475	15	109	16	203
900	0.0004703	6	95	16	184
901	0.0003393	3	98	17	193
902	0.0004724	10	106	18	202
903	0.0005183	30	117	18	204
904	0.000511	16	111	17	206
905	0.0005179	19	108	18	197
906	0.0004481	20	103	19	186
907	0.0005015	0	96	16	192
908	0.0003661	0	81	16	162
909	0.000479	2	92	19	182
910	0.0004752	21	130	18	239
911	0.0004699	10	96	18	182
912	0.000481	4	122	19	240
913	0.0004634	28	106	17	184
914	0.0004872	9	125	19	241
915	0.0004643	26	99	18	172
916	0.0005688	1	101	18	201
917	0.000459	12	110	18	208
918	0.0004674	15	103	19	191
919	0.0004847	34	127	17	220
920	0.0004693	31	117	19	203
921	0.000492	27	125	18	223
922	0.0004753	11	104	16	197
923	0.0003482	18	93	14	168
924	0.0004882	35	119	19	203
925	0.000345	2	92	17	182
926	0.0004646	2	98	17	194
927	0.0005812	8	110	17	212
928	0.0003669	5	102	16	199
929	0.0004715	3	80	13	157
930	0.0004867	43	129	17	215
931	0.0005234	5	103	18	201
932	0.0004763	3	95	15	187
933	0.0004721	20	96	17	172
934	0.0004517	19	107	16	195
935	0.0003557	2	103	15	204
936	0.0004809	6	91	18	176
937	0.0004932	18	109	18	200
938	0.0004952	34	109	18	184
939	0.000468	31	108	14	185
940	0.0004909	21	103	18	185
941	0.0003313	5	87	13	169
942	0.0005	26	115	19	204
943	0.0004774	6	104	17	202
944	0.0003564	5	97	18	189
945	0.0004774	6	104	17	202
946	0.0004845	53	119	17	185
947	0.000506	5	115	17	225
948	0.0003105	3	87	12	171
949	0.0004817	19	99	19	179
950	0.0003628	11	98	17	185
951	0.0004638	22	110	19	198
952	0.0004887	7	107	17	207
953	0.0005131	20	106	18	192
954	0.0004515	3	93	17	183
955	0.000509	10	116	19	222
956	0.0004741	24	100	16	176
957	0.000467	26	116	18	206
958	0.000457	9	98	19	187
959	0.0004588	29	119	18	209
960	0.0005019	12	121	19	230
961	0.0004566	8	98	18	188
962	0.0004557	19	105	15	191
963	0.0005591	5	87	16	169
964	0.0004351	5	100	17	195
965	0.000467	39	102	16	165
966	0.0004893	25	106	16	187
967	0.0004751	19	102	15	185
968	0.0004644	71	135	16	199
969	0.0004728	3	93	15	183
970	0.0003565	3	107	18	211
971	0.000482	9	107	16	205
972	0.0004797	10	110	19	210
973	0.0004575	28	104	19	180
974	0.0005076	3	109	19	215
975	0.000476	18	122	16	226
976	0.0005001	32	119	18	206
977	0.0005093	30	111	19	192
978	0.0004698	16	97	19	178
979	0.0004759	3	108	19	213
980	0.0003749	4	101	17	198
981	0.0004572	25	95	19	165
982	0.0004653	29	120	16	211
983	0.0004812	26	115	17	204
984	0.0005048	37	102	18	167
985	0.0004636	44	133	19	222
986	0.0003838	3	98	18	193
987	0.0004542	14	115	16	216
988	0.0004552	31	115	18	199
989	0.0004555	11	101	18	191
990	0.0004846	28	118	17	208
991	0.0004955	14	121	15	228
992	0.0004956	17	113	19	209
993	0.0004654	10	103	18	196
994	0.000467	9	102	18	195
995	0.000479	17	107	19	197
996	0.000461	7	101	16	195
997	0.0003523	10	110	17	210
998	0.000448	8	106	19	204
999	0.0004854	31	140	18	249
mean	0.00046526	17.315	106.921	17.176	196.527
