# Supplementary material
Source: ML conference proceedings conference paper supplement (https://openreview.net/forum?id=2rAiDBJgR_)
Supplement: supplementary_material [file GG_size-30_test.xlsx]

## Sheet: GS_MaleOpt
	time	SEq	Bal	Reg	Egal
0	0.0002031	42	202	20	362
1	0.0002532	27	221	22	415
2	0.0002529	55	254	26	453
3	0.000239	45	239	29	433
4	0.0002116	14	202	28	390
5	0.0002514	34	215	23	396
6	0.0002369	38	225	27	412
7	0.0002241	21	204	24	387
8	0.0002194	42	199	20	356
9	0.0002676	32	202	23	372
10	0.0002199	42	235	24	428
11	0.0002329	63	253	22	443
12	0.000224	36	218	28	400
13	0.0002694	53	246	24	439
14	0.0002283	22	207	29	392
15	0.0002317	20	205	27	390
16	0.0002284	3	207	26	411
17	0.0002371	35	241	29	447
18	0.0002258	11	220	25	429
19	0.0002398	51	248	23	445
20	0.0002521	36	224	22	412
21	0.0002374	31	229	29	427
22	0.0002402	4	210	28	416
23	0.0002086	72	234	29	396
24	0.0002284	9	203	24	397
25	0.0002298	92	273	27	454
26	0.0002054	114	282	29	450
27	0.0002266	17	202	29	387
28	0.0002301	60	233	28	406
29	0.0002343	61	234	26	407
30	0.0002667	119	285	24	451
31	0.0002544	49	249	27	449
32	0.0002455	7	216	28	425
33	0.0002581	30	231	25	432
34	0.0002054	85	243	28	401
35	0.0002416	21	197	25	373
36	0.0002069	41	207	29	373
37	0.000239	31	243	28	455
38	0.0001996	162	295	25	428
39	0.0002151	71	231	25	391
40	0.0003026	21	225	24	429
41	0.0002173	34	230	29	426
42	0.0002735	31	218	27	405
43	0.0002284	28	221	29	414
44	0.0002768	16	225	25	434
45	0.0002465	69	238	27	407
46	0.0002306	14	222	23	430
47	0.0002288	7	216	29	425
48	0.0002454	88	222	27	356
49	0.0002223	56	240	28	424
50	0.0002348	31	226	23	421
51	0.0002399	156	306	29	456
52	0.0002718	33	228	29	423
53	0.0002396	13	220	24	427
54	0.0002246	84	243	29	402
55	0.0002375	51	227	27	403
56	0.0003333	8	229	26	450
57	0.0001937	117	252	23	387
58	0.0002368	25	207	29	389
59	0.0002164	67	253	29	439
60	0.0002418	84	236	26	388
61	0.0002434	15	234	29	453
62	0.0002414	18	238	28	458
63	0.0002272	11	217	23	423
64	0.0002146	63	218	26	373
65	0.0002548	92	283	27	474
66	0.0002331	26	237	24	448
67	0.0002048	88	237	22	386
68	0.0002212	112	265	28	418
69	0.0002201	93	251	29	409
70	0.0002452	34	216	23	398
71	0.000211	1	195	27	389
72	0.0002009	117	285	27	453
73	0.0002385	10	214	29	418
74	0.00023	24	217	23	410
75	0.0002256	115	271	26	427
76	0.0002239	91	276	24	461
77	0.0002581	46	205	25	364
78	0.0002281	28	202	27	376
79	0.0002183	85	241	27	397
80	0.0002304	71	260	28	449
81	0.0002214	131	257	27	383
82	0.0002041	155	287	27	419
83	0.0002175	69	255	27	441
84	0.0002271	11	214	22	417
85	0.0002336	2	202	27	402
86	0.0001973	64	242	28	420
87	0.0002242	20	246	25	472
88	0.000227	21	201	27	381
89	0.0002357	10	205	24	400
90	0.0002246	141	283	29	425
91	0.0002346	78	224	25	370
92	0.000254	116	298	28	480
93	0.0002218	188	306	28	424
94	0.0002452	9	225	29	441
95	0.0002176	33	225	26	417
96	0.0002404	92	248	23	404
97	0.0002578	53	236	28	419
98	0.0002308	72	220	26	368
99	0.0002168	51	224	27	397
100	0.0002054	123	278	29	433
101	0.0002592	83	237	26	391
102	0.0002271	46	214	27	382
103	0.0002317	43	232	28	421
104	0.0003131	72	233	29	394
105	0.000238	36	223	25	410
106	0.0002684	42	230	29	418
107	0.0002444	35	207	25	379
108	0.0002133	125	276	27	427
109	0.0002656	9	224	29	439
110	0.0003145	42	256	28	470
111	0.0002358	25	208	27	391
112	0.0002371	54	234	27	414
113	0.0002211	71	245	25	419
114	0.0002454	10	230	29	450
115	0.0001972	74	232	24	390
116	0.0002196	110	279	29	448
117	0.0002202	121	280	29	439
118	0.0002258	49	215	28	381
119	0.0002312	43	248	29	453
120	0.0002356	49	242	29	435
121	0.0002244	95	248	28	401
122	0.0002936	6	203	24	400
123	0.0002313	86	264	29	442
124	0.0002548	64	267	28	470
125	0.0002152	63	233	23	403
126	0.0002169	31	217	26	403
127	0.0002595	40	249	25	458
128	0.0001999	57	219	27	381
129	0.0002301	13	221	29	429
130	0.0002771	40	250	28	460
131	0.0002315	26	213	27	400
132	0.0002586	55	224	23	393
133	0.0002187	57	241	27	425
134	0.0002251	171	274	29	377
135	0.0002317	15	197	20	379
136	0.0002255	115	265	27	415
137	0.0002337	85	244	26	403
138	0.0002258	17	235	25	453
139	0.0002024	50	218	27	386
140	0.0002055	60	220	29	380
141	0.0002134	100	268	28	436
142	0.0002137	49	230	29	411
143	0.0002165	49	223	29	397
144	0.0002514	19	223	24	427
145	0.0002082	39	220	24	401
146	0.0002232	128	290	28	452
147	0.0002163	25	227	28	429
148	0.0001958	96	246	28	396
149	0.0002436	46	270	28	494
150	0.0002143	21	199	25	377
151	0.0002263	86	258	28	430
152	0.0002018	99	258	20	417
153	0.0001953	134	284	29	434
154	0.0002011	58	234	27	410
155	0.000234	31	240	29	449
156	0.00022	129	263	26	397
157	0.0002185	43	220	28	397
158	0.0002664	106	282	28	458
159	0.0002355	115	260	29	405
160	0.0002373	64	246	28	428
161	0.0002236	47	198	27	349
162	0.0002525	24	227	24	430
163	0.0002586	27	227	24	427
164	0.0002346	18	228	23	438
165	0.0002107	28	242	27	456
166	0.0002058	42	198	28	354
167	0.0002165	169	320	29	471
168	0.0002506	22	205	29	388
169	0.0003364	39	235	29	431
170	0.0002239	13	203	29	393
171	0.0002161	48	227	20	406
172	0.0002036	97	262	28	427
173	0.000209	122	260	26	398
174	0.0002144	23	230	29	437
175	0.0002262	16	219	27	422
176	0.0002527	16	230	28	444
177	0.0002277	3	220	27	437
178	0.000232	59	236	29	413
179	0.0002675	32	217	24	402
180	0.0002491	75	256	27	437
181	0.0002063	132	273	25	414
182	0.0002668	78	270	28	462
183	0.0002846	24	246	26	468
184	0.0002379	44	213	24	382
185	0.00026	25	253	29	481
186	0.000222	48	234	29	420
187	0.0002086	188	322	28	456
188	0.0002052	102	251	27	400
189	0.0002197	53	197	27	341
190	0.0001883	170	303	29	436
191	0.000266	9	220	25	431
192	0.0002421	44	237	28	430
193	0.0002024	85	239	27	393
194	0.0002292	74	247	29	420
195	0.0002248	4	169	24	334
196	0.0002437	136	289	29	442
197	0.0002462	9	216	24	423
198	0.000231	107	262	26	417
199	0.0002533	45	242	28	439
200	0.0002207	5	202	26	399
201	0.000249	50	245	28	440
202	0.0002136	53	244	27	435
203	0.0002184	40	220	29	400
204	0.0002075	82	251	28	420
205	0.0002358	91	247	29	403
206	0.0002308	115	262	29	409
207	0.0001923	116	261	28	406
208	0.000229	25	214	28	403
209	0.0002231	7	209	22	411
210	0.0002231	37	222	27	407
211	0.0002698	36	224	28	412
212	0.0002301	8	213	24	418
213	0.0002244	72	242	29	412
214	0.0002164	110	255	28	400
215	0.0002107	50	226	25	402
216	0.0002185	62	232	25	402
217	0.0002433	55	243	25	431
218	0.0002422	48	241	26	434
219	0.0002594	43	265	29	487
220	0.0002091	80	246	26	412
221	0.0002101	49	218	28	387
222	0.0002142	15	200	27	385
223	0.0002401	60	219	28	378
224	0.0002391	46	239	29	432
225	0.0002245	57	220	29	383
226	0.0002213	20	200	28	380
227	0.0002179	89	262	28	435
228	0.000196	80	239	27	398
229	0.0002374	74	248	29	422
230	0.0002138	59	235	27	411
231	0.000261	16	222	29	428
232	0.0002147	94	256	25	418
233	0.0002395	23	227	29	431
234	0.0002553	17	223	28	429
235	0.0002512	26	237	23	448
236	0.0002376	52	253	25	454
237	0.0002217	32	222	25	412
238	0.0002256	76	246	29	416
239	0.0002111	6	221	28	436
240	0.0002048	92	259	29	426
241	0.0002043	152	287	29	422
242	0.0002018	70	231	26	392
243	0.000194	159	308	28	457
244	0.0002207	20	208	29	396
245	0.0002202	39	219	23	399
246	0.0002392	40	218	28	396
247	0.0002045	107	249	29	391
248	0.0002046	51	231	28	411
249	0.0002224	108	265	26	422
250	0.0002337	67	218	23	369
251	0.0002341	16	221	24	426
252	0.0002608	25	223	25	421
253	0.0002187	24	216	25	408
254	0.0002798	57	217	28	377
255	0.0002392	85	221	23	357
256	0.0002215	76	250	27	424
257	0.0002393	1	215	27	429
258	0.0001978	64	231	29	398
259	0.000231	20	224	27	428
260	0.0002703	5	197	27	389
261	0.0001914	244	374	29	504
262	0.0002154	90	263	27	436
263	0.0002342	28	214	24	400
264	0.0002483	51	241	26	431
265	0.0002215	50	263	25	476
266	0.0002115	84	248	26	412
267	0.0002204	13	190	25	367
268	0.0002279	74	232	28	390
269	0.0001952	138	272	29	406
270	0.0002272	31	211	28	391
271	0.0002323	6	191	25	376
272	0.000227	22	203	19	384
273	0.0002458	36	243	28	450
274	0.0002706	11	205	23	399
275	0.0002552	139	276	26	413
276	0.0002616	39	221	28	403
277	0.0002282	83	251	29	419
278	0.000202	71	240	28	409
279	0.00021	22	216	24	410
280	0.0002916	56	238	25	420
281	0.0002244	24	188	29	352
282	0.0002215	1	224	28	447
283	0.0002277	37	230	26	423
284	0.0002336	66	260	28	454
285	0.0002132	74	246	26	418
286	0.0002115	103	267	28	431
287	0.0002037	124	267	29	410
288	0.0002093	36	200	28	364
289	0.0002098	14	185	26	356
290	0.000247	94	294	28	494
291	0.0002507	77	261	29	445
292	0.0002336	47	242	25	437
293	0.0002309	42	238	28	434
294	0.0002444	150	289	29	428
295	0.0002257	16	241	29	466
296	0.0002022	163	291	29	419
297	0.000287	25	227	27	429
298	0.0002203	170	315	29	460
299	0.0002271	36	234	26	432
300	0.0002099	107	261	26	415
301	0.0002531	82	232	27	382
302	0.0002358	64	237	21	410
303	0.0002431	19	222	29	425
304	0.0002151	50	230	29	410
305	0.0002377	27	232	28	437
306	0.0002285	103	279	29	455
307	0.0002683	22	247	25	472
308	0.0003028	132	279	28	426
309	0.0002108	215	355	29	495
310	0.000211	95	261	26	427
311	0.0002174	102	279	26	456
312	0.0002309	11	202	23	393
313	0.00022	58	251	28	444
314	0.0002377	27	205	29	383
315	0.0002531	62	210	29	358
316	0.0001916	188	297	29	406
317	0.0003154	30	229	28	428
318	0.0002185	79	235	20	391
319	0.0002023	123	266	27	409
320	0.0002135	51	252	24	453
321	0.0002788	15	210	28	405
322	0.0002393	60	261	27	462
323	0.0001979	91	250	26	409
324	0.0002423	36	257	29	478
325	0.0002277	32	207	25	382
326	0.0002147	43	217	27	391
327	0.0002392	48	224	25	400
328	0.0002404	29	221	27	413
329	0.0002406	0	193	19	386
330	0.0002171	97	258	29	419
331	0.0002457	26	250	28	474
332	0.000267	89	248	26	407
333	0.0002153	48	227	26	406
334	0.0002788	41	230	27	419
335	0.0002485	19	229	24	439
336	0.0002057	65	209	24	353
337	0.0002125	127	273	28	419
338	0.000229	125	285	28	445
339	0.0002164	46	215	29	384
340	0.0002034	138	284	29	430
341	0.0002429	23	229	29	435
342	0.0002204	34	209	24	384
343	0.000228	25	221	29	417
344	0.0002261	49	263	29	477
345	0.0002363	36	263	29	490
346	0.0002194	7	202	27	397
347	0.0002323	30	222	24	414
348	0.0002268	38	242	28	446
349	0.0002149	40	215	25	390
350	0.000269	66	243	27	420
351	0.000229	42	236	29	430
352	0.0002453	41	216	27	391
353	0.0002575	36	200	29	364
354	0.0002409	31	237	28	443
355	0.0002788	7	225	29	443
356	0.0002378	16	214	27	412
357	0.0002026	111	249	29	387
358	0.0002199	49	240	29	431
359	0.0002287	18	204	25	390
360	0.0001942	108	252	25	396
361	0.0002459	20	210	29	400
362	0.0002068	3	182	25	361
363	0.0002467	22	234	25	446
364	0.0002174	39	218	29	397
365	0.0002935	61	218	27	375
366	0.0002167	62	226	28	390
367	0.0002098	89	250	28	411
368	0.0002421	10	210	23	410
369	0.0002511	79	269	29	459
370	0.0002623	80	243	29	406
371	0.0002567	29	219	28	409
372	0.0002312	8	227	26	446
373	0.0002399	3	197	29	391
374	0.0002191	138	284	25	430
375	0.000234	53	225	26	397
376	0.0002652	44	256	27	468
377	0.000276	70	238	24	406
378	0.0002617	54	233	24	412
379	0.0002196	78	242	28	406
380	0.0002167	133	270	25	407
381	0.0002329	24	222	24	420
382	0.0002372	49	218	26	387
383	0.0002456	28	228	29	428
384	0.0002692	102	277	25	452
385	0.000219	108	286	27	464
386	0.0002353	31	218	28	405
387	0.0002381	32	216	25	400
388	0.0002063	188	307	26	426
389	0.0002422	12	201	29	390
390	0.0002579	77	218	29	359
391	0.0002187	145	288	28	431
392	0.0002252	30	226	27	422
393	0.0002377	61	239	28	417
394	0.000236	86	223	29	360
395	0.000225	50	206	28	362
396	0.0002245	6	212	29	418
397	0.0002116	40	216	27	392
398	0.0002262	24	214	28	404
399	0.0002321	63	249	29	435
400	0.0001993	159	285	29	411
401	0.0002127	7	187	29	367
402	0.0002403	111	281	28	451
403	0.0002283	38	216	27	394
404	0.0002282	101	283	26	465
405	0.0002288	53	226	28	399
406	0.0002057	125	286	29	447
407	0.0002464	8	203	26	398
408	0.0002312	50	240	28	430
409	0.0002681	27	215	28	403
410	0.0002395	60	256	29	452
411	0.0002295	52	230	29	408
412	0.000244	1	206	25	411
413	0.0002464	34	247	27	460
414	0.0002233	49	244	27	439
415	0.0002387	26	212	27	398
416	0.0002268	99	242	29	385
417	0.0003585	49	237	29	425
418	0.0002602	69	253	29	437
419	0.000207	112	253	25	394
420	0.0002315	6	201	27	396
421	0.0002302	32	220	28	408
422	0.0002477	4	240	29	476
423	0.0002349	10	190	24	370
424	0.0002147	14	206	24	398
425	0.0002169	120	276	27	432
426	0.0002377	32	226	24	420
427	0.0002183	31	200	26	369
428	0.0002188	84	255	28	426
429	0.0002126	42	236	29	430
430	0.000219	36	219	24	402
431	0.0002178	54	255	29	456
432	0.0002426	2	226	24	450
433	0.0002166	146	295	27	444
434	0.0002242	115	268	27	421
435	0.000242	65	243	29	421
436	0.0003141	66	248	27	430
437	0.000246	44	252	27	460
438	0.0002196	14	211	29	408
439	0.0001951	106	259	29	412
440	0.0002345	16	220	25	424
441	0.0002006	66	226	29	386
442	0.0002415	48	236	26	424
443	0.000245	23	235	23	447
444	0.0002331	37	215	24	393
445	0.0002532	24	212	23	400
446	0.0002157	76	255	27	434
447	0.0002407	80	254	27	428
448	0.0002139	9	213	29	417
449	0.0002115	163	302	28	441
450	0.0002568	113	277	23	441
451	0.0002257	107	273	24	439
452	0.0002566	53	216	26	379
453	0.0002659	119	257	26	395
454	0.0002277	24	203	25	382
455	0.0002812	38	209	29	380
456	0.0002467	50	233	27	416
457	0.0002214	22	217	26	412
458	0.0002476	25	212	27	399
459	0.000212	4	202	29	400
460	0.0002239	36	229	22	422
461	0.0002251	133	274	29	415
462	0.0002534	16	202	26	388
463	0.0002582	106	272	28	438
464	0.000251	32	229	29	426
465	0.0002344	87	263	27	439
466	0.0002879	2	199	22	396
467	0.0002146	31	213	27	395
468	0.0002102	126	265	28	404
469	0.0002079	99	236	28	373
470	0.0002517	27	214	27	401
471	0.0002316	65	229	27	393
472	0.0002253	10	234	29	458
473	0.0002515	17	226	29	435
474	0.0002455	105	251	25	397
475	0.000265	68	276	27	484
476	0.0002566	47	239	29	431
477	0.0002159	28	189	27	350
478	0.0002221	95	255	29	415
479	0.0002157	98	267	28	436
480	0.0002252	28	237	25	446
481	0.0002497	40	225	22	410
482	0.0002384	11	221	29	431
483	0.0002107	93	252	28	411
484	0.0002462	17	184	28	351
485	0.0002079	45	220	26	395
486	0.000193	118	232	27	346
487	0.000243	57	225	20	393
488	0.0002614	55	248	27	441
489	0.0002209	104	264	26	424
490	0.0002439	118	268	24	418
491	0.0002299	32	239	27	446
492	0.0002319	52	232	29	412
493	0.0002309	58	258	27	458
494	0.0002255	62	247	25	432
495	0.0002224	44	237	27	430
496	0.0002264	101	275	29	449
497	0.0002039	1	180	26	359
498	0.0002298	37	247	28	457
499	0.0002663	21	219	27	417
500	0.0001973	70	230	26	390
501	0.0002433	22	247	25	472
502	0.0002182	102	265	29	428
503	0.0002224	111	271	29	431
504	0.000243	35	232	29	429
505	0.0002152	105	252	24	399
506	0.0002207	52	222	29	392
507	0.0002522	49	223	25	397
508	0.0002413	56	235	26	414
509	0.0002199	177	310	29	443
510	0.0002446	80	263	28	446
511	0.0002343	165	310	28	455
512	0.0002502	12	234	27	456
513	0.0002306	44	223	27	402
514	0.0002376	52	230	28	408
515	0.0002299	43	243	28	443
516	0.0002136	184	342	29	500
517	0.0002304	36	236	26	436
518	0.000242	6	227	27	448
519	0.0002349	24	234	29	444
520	0.0002258	72	244	29	416
521	0.0002557	25	242	28	459
522	0.0002455	85	247	28	409
523	0.0002161	83	260	29	437
524	0.0002396	44	216	26	388
525	0.0002348	39	218	26	397
526	0.000223	60	218	22	376
527	0.000239	25	219	29	413
528	0.0002363	75	261	29	447
529	0.0002274	11	198	26	385
530	0.0001982	108	235	26	362
531	0.0002172	16	220	23	424
532	0.0002114	87	239	28	391
533	0.0002203	40	220	26	400
534	0.000235	68	219	29	370
535	0.0002557	39	214	24	389
536	0.0002266	32	205	29	378
537	0.0003153	45	247	27	449
538	0.0002491	10	175	24	340
539	0.0002498	68	247	29	426
540	0.0002109	95	256	29	417
541	0.0002125	78	256	27	434
542	0.0002366	75	233	26	391
543	0.0002233	38	231	29	424
544	0.000235	78	260	27	442
545	0.000222	44	218	27	392
546	0.0002611	90	276	25	462
547	0.0002493	90	254	27	418
548	0.0002455	1	219	27	437
549	0.0002643	40	223	27	406
550	0.000238	12	187	26	362
551	0.0002315	37	213	24	389
552	0.000231	29	206	28	383
553	0.0002187	133	282	29	431
554	0.0002481	12	204	29	396
555	0.0002488	26	247	25	468
556	0.0002545	118	276	28	434
557	0.0002514	4	201	27	398
558	0.0002357	45	249	26	453
559	0.0002499	57	222	26	387
560	0.0002323	27	220	24	413
561	0.0002471	50	247	29	444
562	0.0002428	120	295	28	470
563	0.0002096	158	316	29	474
564	0.0002389	53	215	27	377
565	0.000197	144	298	28	452
566	0.0002255	2	206	27	410
567	0.0002614	9	192	22	375
568	0.0002009	186	295	29	404
569	0.0002099	97	257	28	417
570	0.0002405	27	211	27	395
571	0.0002022	79	240	24	401
572	0.0002706	59	240	29	421
573	0.0002109	80	249	28	418
574	0.0002275	21	204	25	387
575	0.0002571	87	265	28	443
576	0.0002061	102	270	28	438
577	0.0002	40	188	29	336
578	0.0002288	27	237	27	447
579	0.0002147	22	201	28	380
580	0.0002244	85	253	25	421
581	0.0002235	17	216	27	415
582	0.0002317	29	222	22	415
583	0.0002241	13	204	26	395
584	0.0002481	37	251	24	465
585	0.0002392	38	221	29	404
586	0.0002242	10	203	22	396
587	0.0002262	34	239	27	444
588	0.0002926	170	280	28	390
589	0.0002348	3	211	26	419
590	0.0002415	19	202	29	385
591	0.0002074	53	220	29	387
592	0.0002159	69	243	29	417
593	0.0002065	36	203	22	370
594	0.0002198	9	206	28	403
595	0.0001992	170	327	29	484
596	0.0002499	24	225	28	426
597	0.0002251	48	242	25	436
598	0.0002201	14	194	23	374
599	0.0002248	86	241	29	396
600	0.0002157	178	327	28	476
601	0.0002413	79	262	28	445
602	0.0002101	3	184	29	365
603	0.0002245	128	280	27	432
604	0.0002134	68	244	27	420
605	0.0002217	65	267	28	469
606	0.00022	103	263	26	423
607	0.0003925	22	231	26	440
608	0.0002115	152	276	27	400
609	0.0002008	125	284	26	443
610	0.0002442	28	226	27	424
611	0.0002446	49	245	26	441
612	0.0002216	44	216	27	388
613	0.0002182	43	221	23	399
614	0.0002393	49	235	29	421
615	0.000223	74	264	27	454
616	0.000207	69	224	29	379
617	0.0002441	8	223	27	438
618	0.0002296	47	226	29	405
619	0.0002265	56	210	24	364
620	0.0002348	112	242	25	372
621	0.0002349	72	220	29	368
622	0.000221	58	233	26	408
623	0.000272	18	216	24	414
624	0.0002423	8	215	28	422
625	0.0002515	138	288	26	438
626	0.0002092	31	220	28	409
627	0.0002047	63	208	26	353
628	0.0002384	52	222	26	392
629	0.0002803	60	251	25	442
630	0.0002354	69	237	28	405
631	0.0002331	102	270	25	438
632	0.000208	39	219	26	399
633	0.0002563	21	244	28	467
634	0.0002425	43	235	26	427
635	0.0002313	68	241	28	414
636	0.0002426	85	264	27	443
637	0.0002172	5	206	29	407
638	0.0002255	63	240	29	417
639	0.0002139	61	241	25	421
640	0.0002016	95	272	29	449
641	0.0002311	2	212	26	422
642	0.0002744	40	213	28	386
643	0.0002474	24	220	28	416
644	0.0002738	15	242	28	469
645	0.0002215	111	266	26	421
646	0.0002214	76	239	23	402
647	0.0002123	114	278	29	442
648	0.0002592	95	262	29	429
649	0.000299	5	229	25	453
650	0.0002514	127	279	27	431
651	0.000223	37	226	24	415
652	0.000255	66	246	28	426
653	0.0002254	22	230	29	438
654	0.0002124	90	247	28	404
655	0.0002282	26	234	29	442
656	0.0002033	25	224	27	423
657	0.0002803	25	228	29	431
658	0.0002699	25	207	28	389
659	0.0002176	52	216	23	380
660	0.0002143	74	240	28	406
661	0.0004315	35	219	22	403
662	0.0002261	67	212	28	357
663	0.0002303	7	206	27	405
664	0.0002192	73	242	27	411
665	0.0002265	69	232	28	395
666	0.0002238	18	204	29	390
667	0.0001939	133	283	27	433
668	0.0001962	78	213	29	348
669	0.0002417	27	219	23	411
670	0.0002107	67	260	28	453
671	0.0002342	63	257	29	451
672	0.0002181	120	289	26	458
673	0.0002704	115	285	29	455
674	0.0002858	50	245	27	440
675	0.0002154	62	251	26	440
676	0.0002441	15	229	25	443
677	0.0002159	11	203	28	395
678	0.0002958	28	211	27	394
679	0.0002291	52	239	29	426
680	0.0002384	37	217	26	397
681	0.0002199	10	203	28	396
682	0.0002709	43	237	28	431
683	0.0002061	70	227	27	384
684	0.0002453	43	213	29	383
685	0.0002492	21	201	28	381
686	0.0002439	20	213	28	406
687	0.0002131	10	214	26	418
688	0.0002297	88	247	26	406
689	0.0002209	128	275	27	422
690	0.0002455	55	241	29	427
691	0.0002472	58	223	26	388
692	0.0002169	163	316	28	469
693	0.0001991	55	216	27	377
694	0.0002424	50	234	29	418
695	0.0002141	77	248	27	419
696	0.0002366	90	267	28	444
697	0.0002134	17	224	29	431
698	0.0002257	10	217	28	424
699	0.0002659	66	235	29	404
700	0.0002177	76	262	28	448
701	0.0002508	42	234	26	426
702	0.0002569	37	228	24	419
703	0.0002222	34	208	29	382
704	0.0002038	97	245	29	393
705	0.0002453	58	207	27	356
706	0.0002224	103	244	27	385
707	0.00024	37	226	28	415
708	0.0002287	59	238	24	417
709	0.0002766	27	225	27	423
710	0.0002147	100	282	29	464
711	0.0002173	91	236	28	381
712	0.0002094	76	248	25	420
713	0.0002049	81	236	28	391
714	0.000222	33	234	26	435
715	0.0002014	100	246	27	392
716	0.0002318	104	265	29	426
717	0.0002099	17	189	22	361
718	0.0002367	40	234	29	428
719	0.0002023	12	188	27	364
720	0.0002129	65	250	28	435
721	0.0002963	9	208	27	407
722	0.000215	84	240	29	396
723	0.000253	4	215	26	426
724	0.0002107	104	244	27	384
725	0.0002357	106	251	28	396
726	0.0002536	57	245	29	433
727	0.0002468	32	220	26	408
728	0.000201	45	217	28	389
729	0.0002397	14	222	26	430
730	0.0002209	116	275	29	434
731	0.0002282	26	224	23	422
732	0.0001984	128	273	26	418
733	0.0002448	58	226	28	394
734	0.0002171	5	208	27	411
735	0.0002609	46	251	27	456
736	0.0002928	37	240	28	443
737	0.0002371	83	237	24	391
738	0.0002104	94	263	29	432
739	0.0002613	1	220	27	439
740	0.0002219	69	234	23	399
741	0.0002408	10	203	28	396
742	0.0002239	12	225	26	438
743	0.0002273	39	217	24	395
744	0.0002418	108	267	23	426
745	0.0002476	72	251	28	430
746	0.0002251	94	265	29	436
747	0.0002414	30	229	29	428
748	0.0002384	67	238	28	409
749	0.0002039	27	188	24	349
750	0.0002058	106	261	29	416
751	0.0002565	7	206	25	405
752	0.0002301	110	274	28	438
753	0.0002271	55	228	27	401
754	0.0002401	56	240	28	424
755	0.000247	44	238	27	432
756	0.0002826	13	192	23	371
757	0.000215	24	198	27	372
758	0.0001946	79	240	29	401
759	0.0002444	67	227	28	387
760	0.0002283	51	250	27	449
761	0.0002626	28	238	28	448
762	0.000231	7	206	28	405
763	0.0002428	68	260	27	452
764	0.0002417	52	236	25	420
765	0.000212	0	213	26	426
766	0.0002711	30	215	29	400
767	0.0002284	21	213	24	405
768	0.0002095	62	243	22	424
769	0.0002258	46	231	25	416
770	0.0002827	38	205	24	372
771	0.0002372	1	205	28	409
772	0.0002124	84	236	27	388
773	0.0002504	4	223	28	442
774	0.0002336	62	245	24	428
775	0.0001919	122	283	28	444
776	0.0001897	148	289	28	430
777	0.000226	9	206	25	403
778	0.0002384	0	206	28	412
779	0.000234	83	252	22	421
780	0.0002432	73	237	26	401
781	0.0002785	63	230	24	397
782	0.0002478	70	247	28	424
783	0.0002272	5	228	25	451
784	0.0002161	90	246	29	402
785	0.0002245	12	216	29	420
786	0.0002761	81	246	29	411
787	0.0002562	37	208	28	379
788	0.0002083	158	288	28	418
789	0.0002153	102	270	26	438
790	0.0002494	77	254	27	431
791	0.0002795	75	231	21	387
792	0.0002629	39	219	28	399
793	0.0002245	110	273	26	436
794	0.0002406	64	237	29	410
795	0.0002307	141	269	26	397
796	0.0002281	127	287	28	447
797	0.0002339	1	227	29	453
798	0.0002641	30	216	23	402
799	0.0002185	130	277	29	424
800	0.000234	67	231	25	395
801	0.0002376	26	210	29	394
802	0.0002996	47	221	27	395
803	0.0002288	68	237	26	406
804	0.0002416	46	210	25	374
805	0.0002577	168	303	28	438
806	0.0002621	35	215	27	395
807	0.0002232	13	224	26	435
808	0.0002248	135	285	28	435
809	0.0002385	109	261	28	413
810	0.0002579	65	251	29	437
811	0.0002049	115	280	27	445
812	0.0002623	40	224	29	408
813	0.0002233	161	308	25	455
814	0.0002304	18	211	25	404
815	0.000231	44	202	25	360
816	0.0002268	22	227	27	432
817	0.0002183	5	211	29	417
818	0.0001986	243	356	29	469
819	0.0002152	25	202	26	379
820	0.0001945	77	252	28	427
821	0.0002692	57	255	29	453
822	0.0002317	88	261	26	434
823	0.0002483	68	232	29	396
824	0.0002683	27	201	29	375
825	0.0002051	29	221	26	413
826	0.0002307	54	229	27	404
827	0.0002164	81	226	26	371
828	0.0002115	13	190	28	367
829	0.0002554	24	228	25	432
830	0.0002696	32	213	29	394
831	0.0002414	60	246	27	432
832	0.00025	10	242	25	474
833	0.0002156	44	214	29	384
834	0.0002429	73	257	28	441
835	0.0002135	46	199	26	352
836	0.0002261	48	244	29	440
837	0.0002786	13	214	24	415
838	0.000228	24	206	24	388
839	0.0002209	48	233	28	418
840	0.0002642	97	256	29	415
841	0.0002158	96	248	29	400
842	0.0002197	170	319	29	468
843	0.0002259	87	292	29	497
844	0.0002464	47	225	24	403
845	0.0002274	17	220	25	423
846	0.0002111	50	239	26	428
847	0.0002595	120	273	28	426
848	0.0002433	49	223	20	397
849	0.0002974	45	238	23	431
850	0.0002132	5	194	26	383
851	0.0002506	13	201	28	389
852	0.0002599	7	217	29	427
853	0.0002751	7	226	27	445
854	0.0002272	25	205	26	385
855	0.0002379	52	213	26	374
856	0.0002413	100	289	28	478
857	0.0002553	27	226	26	425
858	0.0001975	52	224	25	396
859	0.0001995	91	262	28	433
860	0.0002173	9	200	29	391
861	0.0002534	9	208	23	407
862	0.000222	27	229	27	431
863	0.0002559	41	229	29	417
864	0.0002277	1	212	24	423
865	0.000192	193	294	29	395
866	0.0002364	33	235	28	437
867	0.0002463	7	197	26	387
868	0.0002146	44	235	29	426
869	0.0002262	94	265	27	436
870	0.0002554	85	259	25	433
871	0.0002903	44	225	23	406
872	0.0002155	41	242	28	443
873	0.0002174	182	296	29	410
874	0.0001972	70	243	26	416
875	0.0002052	16	200	23	384
876	0.0002112	3	202	27	401
877	0.0002239	120	235	27	350
878	0.0002177	36	209	23	382
879	0.000267	83	268	29	453
880	0.0002631	90	260	26	430
881	0.0002127	34	211	29	388
882	0.0002338	81	237	25	393
883	0.0002772	56	229	27	402
884	0.0002588	52	226	27	400
885	0.0002613	29	220	22	411
886	0.0002038	66	238	23	410
887	0.000241	19	226	21	433
888	0.0002089	53	237	28	421
889	0.0001935	114	264	29	414
890	0.0001971	115	241	23	367
891	0.0002292	7	194	28	381
892	0.0002304	11	190	27	369
893	0.0002378	68	257	23	446
894	0.0002399	5	214	23	423
895	0.0002664	10	242	28	474
896	0.0002539	20	217	22	414
897	0.000237	7	225	25	443
898	0.0002133	31	212	26	393
899	0.0002291	6	186	26	366
900	0.0002285	108	250	23	392
901	0.0002388	48	226	25	404
902	0.000267	38	213	28	388
903	0.0002514	57	242	27	427
904	0.0002473	85	261	28	437
905	0.0002638	84	261	26	438
906	0.0002276	22	223	25	424
907	0.0002576	38	241	28	444
908	0.0002479	48	220	23	392
909	0.0002706	28	229	26	430
910	0.0002081	74	235	21	396
911	0.0002315	25	228	28	431
912	0.0002424	1	223	27	445
913	0.000263	68	255	28	442
914	0.0002483	20	215	25	410
915	0.0002345	38	234	28	430
916	0.0002659	63	243	27	423
917	0.0002178	66	239	29	412
918	0.000233	87	239	29	391
919	0.0002266	193	316	29	439
920	0.0002007	90	241	23	392
921	0.0002122	1	199	27	397
922	0.0002582	47	232	25	417
923	0.0002298	99	263	24	427
924	0.0002601	0	206	28	412
925	0.000233	185	302	29	419
926	0.0002521	92	267	29	442
927	0.0002225	26	214	26	402
928	0.0002297	98	263	27	428
929	0.0002109	155	282	28	409
930	0.0002189	143	278	26	413
931	0.0002425	55	234	27	413
932	0.0002451	15	223	29	431
933	0.0002588	11	216	26	421
934	0.0002528	5	196	24	387
935	0.0002105	27	210	26	393
936	0.0002347	62	230	27	398
937	0.0002677	74	256	28	438
938	0.0002182	47	223	24	399
939	0.0002619	34	226	26	418
940	0.0002329	57	238	29	419
941	0.0002486	40	215	26	390
942	0.0002227	63	242	29	421
943	0.0002344	29	227	23	425
944	0.000253	52	219	25	386
945	0.0002308	45	249	29	453
946	0.0002531	65	251	25	437
947	0.0002876	15	226	29	437
948	0.000273	19	206	26	393
949	0.0002565	36	229	22	422
950	0.0002123	114	262	27	410
951	0.0002402	9	232	25	455
952	0.0002122	66	227	28	388
953	0.0002375	50	240	28	430
954	0.0002432	51	238	27	425
955	0.0002487	64	235	28	406
956	0.000251	31	237	23	443
957	0.0002236	107	250	27	393
958	0.0002433	10	219	25	428
959	0.0002691	30	238	25	446
960	0.000277	38	238	25	438
961	0.0002208	18	223	29	428
962	0.0002617	51	258	27	465
963	0.0002117	132	256	28	380
964	0.0002282	39	216	29	393
965	0.0002327	153	306	28	459
966	0.0002988	145	299	21	453
967	0.0002178	75	264	29	453
968	0.000216	78	250	26	422
969	0.0002291	11	201	26	391
970	0.0002773	162	316	28	470
971	0.0002081	86	245	25	404
972	0.0002464	24	222	23	420
973	0.00022	61	243	28	425
974	0.0002048	48	209	26	370
975	0.0002286	81	260	28	439
976	0.0002235	18	195	28	372
977	0.0002187	17	200	29	383
978	0.0002684	32	232	27	432
979	0.0002054	136	294	27	452
980	0.0002435	100	281	27	462
981	0.0002278	56	224	28	392
982	0.0002186	52	236	29	420
983	0.0002165	109	279	28	449
984	0.0002199	28	231	24	434
985	0.0002021	55	233	25	411
986	0.0002959	104	239	29	374
987	0.0002799	50	265	27	480
988	0.0001953	144	288	27	432
989	0.0002024	90	241	24	392
990	0.0002155	55	243	28	431
991	0.0002053	22	194	28	366
992	0.000246	71	262	29	453
993	0.0002081	76	242	25	408
994	0.000234	97	269	25	441
995	0.0002039	79	250	25	421
996	0.000307	47	232	25	417
997	0.0002288	74	250	26	426
998	0.0001964	97	268	25	439
999	0.0002916	12	205	28	398
mean	0.00023385	58.318	237.162	26.778	416.006

## Sheet: GS_FemaleOpt
	time	SEq	Bal	Reg	Egal
0	0.0002284	19	193	22	367
1	0.0002093	79	257	28	435
2	0.0002363	9	234	29	459
3	0.0002464	33	234	29	435
4	0.0002303	14	202	28	390
5	0.0002231	34	215	23	396
6	0.0002026	99	263	27	427
7	0.0002047	34	211	26	388
8	0.0002054	10	188	24	366
9	0.0002597	19	197	24	375
10	0.0002183	14	213	24	412
11	0.0002305	20	237	22	454
12	0.0002192	36	218	28	400
13	0.000212	79	258	24	437
14	0.0001944	52	226	29	400
15	0.0002037	38	222	29	406
16	0.0002108	25	218	27	411
17	0.0002132	35	241	29	447
18	0.0002113	1	213	25	425
19	0.0002182	32	238	23	444
20	0.0001803	194	317	27	440
21	0.000218	21	215	28	409
22	0.0002085	16	213	28	410
23	0.0001938	94	249	29	404
24	0.0002012	78	228	26	378
25	0.0002203	1	235	29	469
26	0.0001927	153	299	26	445
27	0.0001945	49	217	29	385
28	0.0001843	140	276	29	412
29	0.00021	46	224	26	402
30	0.0002046	119	285	24	451
31	0.0002071	56	242	25	428
32	0.0002114	66	243	28	420
33	0.0001956	85	256	25	427
34	0.0001958	143	295	25	447
35	0.0001928	146	281	26	416
36	0.0002034	51	203	23	355
37	0.0002119	39	253	26	467
38	0.0002232	91	240	24	389
39	0.0001955	89	239	26	389
40	0.0002096	17	215	24	413
41	0.0002172	24	218	29	412
42	0.0002023	31	218	27	405
43	0.0002612	39	227	29	415
44	0.0002608	68	244	27	420
45	0.0001945	85	243	27	401
46	0.0001984	115	279	25	443
47	0.0002871	7	216	29	425
48	0.0002608	8	189	27	370
49	0.0002008	66	238	28	410
50	0.0002203	31	226	23	421
51	0.0002535	67	243	29	419
52	0.0001949	98	268	28	438
53	0.0002238	13	220	24	427
54	0.0002082	25	215	27	405
55	0.0001939	63	232	29	401
56	0.0002132	23	234	26	445
57	0.0002105	2	198	21	394
58	0.0001965	71	236	29	401
59	0.0002667	100	254	24	408
60	0.0002216	92	242	26	392
61	0.0001913	149	295	27	441
62	0.0002189	18	238	28	458
63	0.0002001	75	260	28	445
64	0.0001983	55	228	29	401
65	0.0002132	4	235	29	466
66	0.0002166	26	237	24	448
67	0.0002164	88	237	22	386
68	0.0001905	104	251	26	398
69	0.0001979	24	194	23	364
70	0.0001947	66	227	23	388
71	0.0001942	30	206	26	382
72	0.0002422	27	234	27	441
73	0.0002628	37	237	29	437
74	0.0002262	24	217	23	410
75	0.0002061	70	259	27	448
76	0.0002194	61	279	28	497
77	0.0001907	160	266	25	372
78	0.0002574	46	227	27	408
79	0.0002232	20	207	27	394
80	0.0002897	5	237	25	469
81	0.0002054	32	215	27	398
82	0.0002329	109	262	28	415
83	0.0002187	69	255	27	441
84	0.0001973	122	269	28	416
85	0.0002078	60	240	29	420
86	0.0002	27	214	28	401
87	0.0002121	58	265	27	472
88	0.0001981	21	201	27	381
89	0.0002046	54	237	26	420
90	0.0002265	30	238	24	446
91	0.0002452	14	202	23	390
92	0.0001916	148	313	29	478
93	0.000225	98	259	26	420
94	0.0002177	12	219	29	426
95	0.0002184	29	225	29	421
96	0.0002135	5	205	24	405
97	0.0002331	53	236	28	419
98	0.0002054	22	194	28	366
99	0.0002404	9	207	27	405
100	0.0001998	35	216	27	397
101	0.0001888	83	237	26	391
102	0.0001936	74	223	26	372
103	0.0002182	43	232	28	421
104	0.0001948	91	244	29	397
105	0.0002721	36	223	25	410
106	0.0002104	100	263	29	426
107	0.0002065	35	207	25	379
108	0.0002055	32	222	27	412
109	0.0002272	9	224	29	439
110	0.0001924	146	308	26	470
111	0.0002122	25	208	27	391
112	0.0002094	14	221	27	428
113	0.0002343	71	245	25	419
114	0.000204	105	273	29	441
115	0.0002118	9	204	24	399
116	0.0002264	144	302	27	460
117	0.0001995	73	246	25	419
118	0.0002059	15	195	25	375
119	0.0002175	36	246	29	456
120	0.0002584	49	242	29	435
121	0.0002218	70	236	26	402
122	0.0002105	6	203	24	400
123	0.0002248	39	241	24	443
124	0.0001889	163	300	29	437
125	0.0002315	41	236	28	431
126	0.000208	57	219	29	381
127	0.0001951	180	320	28	460
128	0.0002058	40	209	27	378
129	0.00021	35	232	29	429
130	0.0002221	16	232	28	448
131	0.0001966	45	224	29	403
132	0.0001984	78	233	25	388
133	0.0002233	25	223	27	421
134	0.0002142	51	205	27	359
135	0.0002018	15	197	20	379
136	0.0002435	13	225	26	437
137	0.000195	106	258	26	410
138	0.000253	19	234	25	449
139	0.0002934	20	200	27	380
140	0.0002076	19	204	23	389
141	0.0002052	51	240	29	429
142	0.0002031	33	211	24	389
143	0.0002724	11	209	28	407
144	0.0002422	19	223	24	427
145	0.000191	16	198	25	380
146	0.0002213	13	220	27	427
147	0.0002193	93	256	26	419
148	0.0002157	15	206	25	397
149	0.0002089	23	253	27	483
150	0.0002085	21	199	25	377
151	0.000216	2	209	26	416
152	0.0002603	18	233	26	448
153	0.0002155	8	214	28	420
154	0.0002837	4	199	26	394
155	0.0002445	69	252	28	435
156	0.0002109	40	217	27	394
157	0.0001946	81	248	27	415
158	0.0001995	68	248	28	428
159	0.0002209	26	224	22	422
160	0.0002374	38	220	28	402
161	0.000222	47	198	27	349
162	0.0002112	72	249	24	426
163	0.0002052	77	267	23	457
164	0.0002329	38	222	23	406
165	0.0002014	67	254	27	441
166	0.0002317	25	195	28	365
167	0.0002287	16	231	26	446
168	0.0002062	22	205	29	388
169	0.0002258	0	208	28	416
170	0.0001935	78	230	29	382
171	0.0002081	28	212	21	396
172	0.0001978	168	317	29	466
173	0.0002159	11	209	28	407
174	0.0002036	87	269	29	451
175	0.0002159	0	214	27	428
176	0.0002693	65	253	27	441
177	0.0002326	3	220	27	437
178	0.0002071	103	275	28	447
179	0.0002527	48	234	29	420
180	0.0001841	141	292	28	443
181	0.000209	2	202	29	402
182	0.0002122	78	270	28	462
183	0.0002155	78	271	27	464
184	0.000195	63	222	29	381
185	0.0002138	25	253	29	481
186	0.0002692	28	221	28	414
187	0.000221	26	234	25	442
188	0.0002105	51	213	28	375
189	0.0002124	36	186	27	336
190	0.0002405	150	256	28	362
191	0.0002081	49	245	28	441
192	0.0002147	44	237	28	430
193	0.0002294	40	209	27	378
194	0.0002329	16	219	28	422
195	0.0001924	9	173	24	337
196	0.0002045	30	219	29	408
197	0.0002207	9	216	24	423
198	0.0002148	28	231	26	434
199	0.0002204	7	223	28	439
200	0.0002368	25	210	26	395
201	0.0002027	103	275	28	447
202	0.0002684	26	236	29	446
203	0.0002184	11	212	29	413
204	0.0002219	56	230	28	404
205	0.0002394	84	244	29	404
206	0.0002434	48	231	29	414
207	0.0002344	100	252	28	404
208	0.0002057	25	214	28	403
209	0.0002088	39	229	28	419
210	0.0002397	37	222	27	407
211	0.0001992	34	215	26	396
212	0.0002138	81	261	24	441
213	0.0002212	34	223	29	412
214	0.0002476	38	218	28	398
215	0.0002344	5	209	29	413
216	0.0002644	21	216	28	411
217	0.0002297	18	230	25	442
218	0.0001865	186	305	25	424
219	0.000195	123	287	27	451
220	0.000227	40	233	26	426
221	0.0002391	96	263	27	430
222	0.0002057	59	225	22	391
223	0.0002162	60	219	28	378
224	0.0002009	102	283	29	464
225	0.0001918	68	224	29	380
226	0.0001934	50	214	28	378
227	0.0002068	61	248	24	435
228	0.0001868	126	270	25	414
229	0.000199	47	230	22	413
230	0.0002237	59	235	27	411
231	0.0002076	39	233	27	427
232	0.000194	67	225	22	383
233	0.0002241	72	239	28	406
234	0.0002749	43	231	28	419
235	0.000199	134	295	29	456
236	0.0002233	29	239	29	449
237	0.0002275	32	222	25	412
238	0.0002011	76	246	29	416
239	0.000216	6	221	28	436
240	0.0002072	94	254	27	414
241	0.0002005	67	233	25	399
242	0.0002028	39	225	24	411
243	0.0002255	108	273	26	438
244	0.0001949	96	253	29	410
245	0.0002165	12	213	26	414
246	0.0002032	84	245	27	406
247	0.00021	6	198	25	390
248	0.0002016	72	248	28	424
249	0.0002288	4	201	26	398
250	0.0001914	88	229	23	370
251	0.0002004	67	246	24	425
252	0.0002654	25	223	25	421
253	0.0001945	111	248	22	385
254	0.0002013	3	184	28	365
255	0.0002106	85	221	23	357
256	0.0001828	154	285	26	416
257	0.0002107	1	215	27	429
258	0.0002472	64	231	29	398
259	0.00022	74	263	27	452
260	0.0002186	5	197	27	389
261	0.0002156	6	209	25	412
262	0.0002186	30	229	27	428
263	0.0002176	6	205	24	404
264	0.0002045	51	241	26	431
265	0.0002424	70	271	29	472
266	0.0002005	90	246	27	402
267	0.0002057	13	190	25	367
268	0.0002249	43	218	24	393
269	0.0002085	14	211	23	408
270	0.0002005	49	215	26	381
271	0.0001963	37	213	25	389
272	0.0002016	22	203	19	384
273	0.0001981	108	272	23	436
274	0.0002244	11	205	23	399
275	0.0002104	58	242	28	426
276	0.0002261	27	214	28	401
277	0.0002172	13	215	26	417
278	0.0002336	47	245	27	443
279	0.0001927	82	246	28	410
280	0.0001988	74	247	25	420
281	0.0002099	24	188	29	352
282	0.0002169	1	224	28	447
283	0.0001856	160	289	27	418
284	0.0002279	3	213	29	423
285	0.0002017	75	269	28	463
286	0.000222	53	239	28	425
287	0.0002182	30	225	29	420
288	0.0002114	36	200	28	364
289	0.0002262	14	185	26	356
290	0.0002117	53	260	27	467
291	0.000208	29	221	24	413
292	0.0001989	120	273	28	426
293	0.0002205	29	225	25	421
294	0.0002145	13	209	26	405
295	0.0002535	18	231	28	444
296	0.0001968	65	227	29	389
297	0.0002052	81	263	29	445
298	0.0002343	61	264	24	467
299	0.0002143	19	215	24	411
300	0.0001984	151	296	28	441
301	0.0002125	16	220	28	424
302	0.0001956	64	237	21	410
303	0.0002152	19	222	29	425
304	0.0002022	45	239	29	433
305	0.0002032	62	243	29	424
306	0.0002454	67	265	29	463
307	0.0002046	96	286	25	476
308	0.0002094	68	245	28	422
309	0.0001817	148	286	29	424
310	0.0002813	95	261	26	427
311	0.0002213	26	236	28	446
312	0.0002026	59	239	28	419
313	0.000229	11	231	24	451
314	0.000213	27	205	29	383
315	0.0002181	43	199	29	355
316	0.0002161	24	232	27	440
317	0.000209	30	229	28	428
318	0.0002176	39	222	22	405
319	0.0002376	123	266	27	409
320	0.0002054	74	262	27	450
321	0.0002123	27	221	28	415
322	0.0002122	54	250	29	446
323	0.000241	80	245	26	410
324	0.0001955	132	295	28	458
325	0.0002055	83	228	27	373
326	0.0002114	7	198	19	389
327	0.0002083	8	204	24	400
328	0.0002049	11	201	26	391
329	0.000189	123	269	29	415
330	0.0002218	65	241	24	417
331	0.000219	9	243	29	477
332	0.0001963	89	248	26	407
333	0.0001948	39	211	26	383
334	0.0002306	5	211	24	417
335	0.0001964	106	277	29	448
336	0.0002035	22	196	24	370
337	0.0002191	110	272	29	434
338	0.0002287	107	279	26	451
339	0.0001935	14	190	28	366
340	0.0002011	112	282	26	452
341	0.0002082	111	285	29	459
342	0.0002129	13	194	24	375
343	0.0001948	143	292	29	441
344	0.0002197	79	274	28	469
345	0.0002255	37	257	29	477
346	0.0002017	14	202	29	390
347	0.0002396	26	209	22	392
348	0.0001983	116	280	28	444
349	0.0002245	31	210	25	389
350	0.0002275	105	255	28	405
351	0.0002531	42	236	29	430
352	0.0002009	57	219	27	381
353	0.0001998	36	200	29	364
354	0.0002135	31	237	28	443
355	0.0002244	7	225	29	443
356	0.0001906	128	276	28	424
357	0.0001896	108	265	29	422
358	0.0002234	30	238	28	446
359	0.0002092	18	204	25	390
360	0.0002169	60	221	24	382
361	0.0002026	123	288	28	453
362	0.0001908	76	220	23	364
363	0.0001969	84	256	23	428
364	0.0002327	14	208	29	402
365	0.0001998	61	218	27	375
366	0.0001896	91	236	25	381
367	0.0001995	63	238	25	413
368	0.0002055	10	210	23	410
369	0.000215	102	290	29	478
370	0.0002159	10	207	29	404
371	0.000213	29	219	28	409
372	0.0002231	34	244	29	454
373	0.0001914	95	242	29	389
374	0.0002435	35	239	27	443
375	0.0002252	13	217	29	421
376	0.0001907	129	294	29	459
377	0.0001983	60	236	24	412
378	0.0002092	23	229	24	435
379	0.0002064	56	231	29	406
380	0.0002216	27	212	24	397
381	0.0002074	68	246	29	424
382	0.0001973	49	218	26	387
383	0.0002068	129	279	29	429
384	0.0002001	141	304	25	467
385	0.000229	29	233	26	437
386	0.0001942	61	230	28	399
387	0.0002003	10	210	25	410
388	0.000194	119	275	27	431
389	0.0001896	49	213	29	377
390	0.0002065	87	223	29	359
391	0.0002289	10	215	29	420
392	0.000226	69	232	27	395
393	0.0001912	115	274	29	433
394	0.0002159	86	223	29	360
395	0.000215	50	206	28	362
396	0.0002196	26	225	28	424
397	0.0002171	18	220	27	422
398	0.0001973	79	249	28	419
399	0.0002257	53	244	29	435
400	0.0002043	63	245	27	427
401	0.0002511	3	183	29	363
402	0.000231	16	212	28	408
403	0.0002538	13	203	27	393
404	0.0002167	63	247	28	431
405	0.0002192	15	223	28	431
406	0.0002154	16	224	27	432
407	0.0002075	8	203	26	398
408	0.0002275	5	218	28	431
409	0.0001915	157	283	24	409
410	0.0002323	11	231	25	451
411	0.0002461	52	230	29	408
412	0.0002023	55	233	28	411
413	0.0002135	86	262	29	438
414	0.0002174	32	238	26	444
415	0.0002207	26	212	27	398
416	0.0002149	59	220	29	381
417	0.0002045	49	237	29	425
418	0.0002095	65	257	29	449
419	0.0002152	14	204	27	394
420	0.0002441	10	208	27	406
421	0.0001986	75	245	28	415
422	0.0002216	49	274	29	499
423	0.0002063	10	190	24	370
424	0.0002147	31	218	24	405
425	0.0002213	1	232	29	463
426	0.000211	62	241	29	420
427	0.0002005	13	191	28	369
428	0.0002061	9	207	26	405
429	0.0002249	42	236	29	430
430	0.0002088	14	215	28	416
431	0.0002036	77	271	29	465
432	0.0002717	72	260	28	448
433	0.0002403	25	234	23	443
434	0.0002023	47	234	27	421
435	0.0001928	70	243	27	416
436	0.0002284	110	274	27	438
437	0.0002168	11	228	24	445
438	0.0002178	51	230	29	409
439	0.0002409	91	239	27	387
440	0.000196	95	265	26	435
441	0.000224	3	198	28	393
442	0.0002071	22	225	26	428
443	0.0002153	23	235	23	447
444	0.0001928	102	249	28	396
445	0.0002089	117	256	27	395
446	0.0001949	59	236	27	413
447	0.0001972	110	291	28	472
448	0.0002265	9	213	29	417
449	0.0003112	71	248	28	425
450	0.0001974	113	277	23	441
451	0.0002471	1	218	27	435
452	0.0001933	90	232	26	374
453	0.0002291	36	210	26	384
454	0.000229	59	224	29	389
455	0.00023	38	209	29	380
456	0.0002214	50	233	27	416
457	0.0002054	56	242	26	428
458	0.000218	25	212	27	399
459	0.0002193	4	202	29	400
460	0.0002111	59	254	26	449
461	0.0002191	34	217	26	400
462	0.0002146	2	190	27	378
463	0.0001973	106	272	28	438
464	0.0002149	32	229	29	426
465	0.0002108	87	263	27	439
466	0.0002212	14	209	22	404
467	0.0001856	167	296	29	425
468	0.0002089	84	255	28	426
469	0.0002206	39	209	27	379
470	0.0002062	27	214	27	401
471	0.0002049	36	225	28	414
472	0.0002088	70	265	26	460
473	0.000199	141	279	27	417
474	0.0002164	125	266	25	407
475	0.0002705	10	241	24	472
476	0.0002052	124	285	27	446
477	0.0002084	1	185	29	369
478	0.0001865	106	260	28	414
479	0.0002108	39	230	28	421
480	0.0002097	14	221	25	428
481	0.0002166	75	246	29	417
482	0.000203	111	283	26	455
483	0.0002758	40	220	28	400
484	0.0001976	84	230	23	376
485	0.000215	21	203	26	385
486	0.0002139	15	192	26	369
487	0.0002003	57	225	20	393
488	0.0002036	79	261	27	443
489	0.0002	82	253	24	424
490	0.0001852	118	268	24	418
491	0.0002077	71	260	28	449
492	0.0001975	114	266	29	418
493	0.0002117	30	250	26	470
494	0.0002187	27	232	25	437
495	0.0001988	90	262	28	434
496	0.0002121	48	243	25	438
497	0.0001861	75	221	27	367
498	0.0002193	22	232	27	442
499	0.0002196	21	219	27	417
500	0.0002193	36	215	26	394
501	0.00021	76	270	26	464
502	0.000233	78	250	29	422
503	0.0002197	45	239	28	433
504	0.0002251	1	210	29	419
505	0.0002086	20	208	23	396
506	0.000223	52	222	29	392
507	0.0001926	67	228	24	389
508	0.0001974	115	272	26	429
509	0.0002236	62	241	26	420
510	0.0002015	150	302	29	454
511	0.0002214	61	243	24	425
512	0.000223	27	242	27	457
513	0.0002243	44	223	27	402
514	0.0002315	27	226	29	425
515	0.0002167	8	220	28	432
516	0.0002471	84	284	27	484
517	0.0002105	2	223	25	444
518	0.0002104	68	269	29	470
519	0.000212	136	292	29	448
520	0.0002277	72	244	29	416
521	0.0002394	25	242	28	459
522	0.0002224	48	223	28	398
523	0.0002303	11	223	28	435
524	0.0002125	82	237	26	392
525	0.0001952	121	278	29	435
526	0.0002173	4	187	28	370
527	0.0002089	7	206	29	405
528	0.0002297	75	261	29	447
529	0.0002057	41	209	26	377
530	0.0002126	83	223	26	363
531	0.0002578	89	255	27	421
532	0.0002122	51	221	28	391
533	0.0002103	58	231	25	404
534	0.0001896	68	219	29	370
535	0.0002858	39	214	24	389
536	0.0002528	22	202	29	382
537	0.0002327	45	247	27	449
538	0.0001997	10	175	24	340
539	0.0002082	35	232	29	429
540	0.0002106	2	206	25	410
541	0.0002352	78	256	27	434
542	0.0002158	30	211	25	392
543	0.0001964	78	254	26	430
544	0.0001911	109	273	29	437
545	0.0002044	21	211	28	401
546	0.0002425	58	272	27	486
547	0.0001967	90	254	27	418
548	0.0002119	14	223	29	432
549	0.0002048	85	261	28	437
550	0.0001881	55	210	28	365
551	0.0002002	60	222	24	384
552	0.0002046	66	229	27	392
553	0.0002946	19	207	23	395
554	0.0002124	12	204	29	396
555	0.0002161	135	312	29	489
556	0.0002006	118	276	28	434
557	0.0002149	4	201	27	398
558	0.0002647	75	267	26	459
559	0.0001937	85	232	26	379
560	0.0002114	67	246	24	425
561	0.0001939	109	274	29	439
562	0.0002272	30	237	25	444
563	0.0001985	103	272	27	441
564	0.0002065	9	184	25	359
565	0.0002317	47	246	23	445
566	0.0002125	20	212	27	404
567	0.0002121	137	282	27	427
568	0.0002097	34	224	27	414
569	0.0002866	32	231	28	430
570	0.000215	27	211	27	395
571	0.0002018	12	202	26	392
572	0.0002086	59	240	29	421
573	0.0001923	111	252	29	393
574	0.0002278	21	207	27	393
575	0.0002087	96	273	26	450
576	0.0001854	140	285	27	430
577	0.0001986	1	162	25	323
578	0.0002048	90	272	29	454
579	0.0002179	97	247	26	397
580	0.0002057	59	237	27	415
581	0.0001977	96	269	28	442
582	0.0001953	98	262	29	426
583	0.0001977	82	245	21	408
584	0.000257	37	251	24	465
585	0.0002154	59	237	28	415
586	0.0002157	76	238	22	400
587	0.0002324	84	261	26	438
588	0.0001919	170	280	28	390
589	0.0002055	91	254	26	417
590	0.0002087	33	213	28	393
591	0.0001938	88	236	29	384
592	0.0002347	69	243	29	417
593	0.0002352	49	216	25	383
594	0.0002142	45	221	28	397
595	0.0002114	41	256	26	471
596	0.0002142	24	225	28	426
597	0.0002159	23	221	25	419
598	0.000247	14	194	23	374
599	0.00021	65	252	28	439
600	0.0002589	77	264	28	451
601	0.0002055	86	265	28	444
602	0.0002049	27	194	29	361
603	0.0001913	132	277	27	422
604	0.0001925	166	302	27	438
605	0.0002174	43	239	29	435
606	0.0002356	66	245	28	424
607	0.0002024	65	247	26	429
608	0.000236	38	228	29	418
609	0.0002117	36	223	28	410
610	0.0002041	92	245	24	398
611	0.0002131	16	220	27	424
612	0.0002214	44	216	27	388
613	0.0002279	43	221	23	399
614	0.0002162	3	214	27	425
615	0.0002264	51	249	27	447
616	0.0002165	69	224	29	379
617	0.0002543	8	223	27	438
618	0.0002114	11	204	27	397
619	0.0002054	38	199	24	360
620	0.0002713	40	223	29	406
621	0.0002099	56	221	28	386
622	0.0002343	28	221	27	414
623	0.0001968	140	281	28	422
624	0.0001952	91	252	28	413
625	0.0002174	17	231	22	445
626	0.000214	19	218	28	417
627	0.0002096	8	188	26	368
628	0.0001915	52	222	26	392
629	0.0002209	159	303	29	447
630	0.0002182	7	206	26	405
631	0.0002211	33	233	23	433
632	0.0002015	64	229	24	394
633	0.0002045	74	260	28	446
634	0.0001962	69	244	24	419
635	0.0001929	105	262	27	419
636	0.000243	85	264	27	443
637	0.0002028	80	243	29	406
638	0.0002199	10	221	26	432
639	0.0001967	28	212	25	396
640	0.0002082	43	236	25	429
641	0.0002097	37	229	26	421
642	0.0002146	40	213	28	386
643	0.0002238	54	243	28	432
644	0.0002153	26	249	28	472
645	0.0001968	61	234	23	407
646	0.0002078	15	215	25	415
647	0.0002408	49	230	27	411
648	0.0001951	95	262	29	429
649	0.0002164	64	269	29	474
650	0.0001974	88	278	28	468
651	0.0002518	9	214	25	419
652	0.0002217	40	230	28	420
653	0.0002434	67	245	29	423
654	0.0002173	52	227	26	402
655	0.0002058	45	242	29	439
656	0.0002181	25	224	27	423
657	0.0002195	70	248	26	426
658	0.0001878	133	260	28	387
659	0.0002393	52	216	23	380
660	0.0001969	63	233	28	403
661	0.0002017	65	232	27	399
662	0.0002707	11	200	27	389
663	0.000222	7	206	27	405
664	0.0002093	45	233	29	421
665	0.000209	26	220	29	414
666	0.0002033	18	204	29	390
667	0.0002259	51	253	24	455
668	0.0001908	49	210	29	371
669	0.0002008	43	223	23	403
670	0.0002176	1	221	28	441
671	0.0002119	54	235	24	416
672	0.0002597	120	289	26	458
673	0.0001906	135	292	25	449
674	0.000218	92	268	28	444
675	0.0001979	95	276	27	457
676	0.000212	25	232	25	439
677	0.0002373	82	240	29	398
678	0.0001933	91	234	28	377
679	0.0001925	105	269	26	433
680	0.0002122	37	217	26	397
681	0.0001915	136	278	27	420
682	0.0002169	54	252	25	450
683	0.0001988	70	227	24	384
684	0.0002098	43	213	29	383
685	0.0002008	32	208	26	384
686	0.0002089	11	211	28	411
687	0.0001938	110	280	26	450
688	0.000201	112	274	29	436
689	0.0002103	113	258	29	403
690	0.0001958	77	248	29	419
691	0.0001882	166	290	26	414
692	0.000228	74	263	28	452
693	0.0002053	57	215	29	373
694	0.0002069	74	252	29	430
695	0.0003256	79	274	26	469
696	0.0002269	37	242	28	447
697	0.000204	130	288	29	446
698	0.0002644	10	217	28	424
699	0.0001979	93	248	29	403
700	0.0002195	6	230	27	454
701	0.0002098	43	242	27	441
702	0.0002504	35	235	25	435
703	0.0002127	35	214	27	393
704	0.0002141	10	203	27	396
705	0.0001966	58	207	27	356
706	0.000213	19	219	25	419
707	0.000218	10	225	28	440
708	0.0001994	59	238	24	417
709	0.000199	83	268	27	453
710	0.000235	49	244	26	439
711	0.0002005	98	246	28	394
712	0.0002147	56	243	29	430
713	0.0002221	13	215	27	417
714	0.0002119	70	264	25	458
715	0.0002128	26	200	29	374
716	0.000198	39	219	29	399
717	0.0001872	73	218	25	363
718	0.0002116	20	222	29	424
719	0.0001863	93	235	25	377
720	0.0002547	8	215	25	422
721	0.0002161	9	208	27	407
722	0.0001952	59	234	23	409
723	0.0002354	4	215	26	426
724	0.0002207	33	213	26	393
725	0.0002083	106	251	28	396
726	0.0002211	57	245	29	433
727	0.0002334	52	225	26	398
728	0.0002045	2	188	28	374
729	0.0002155	20	228	28	436
730	0.0002203	83	251	29	419
731	0.0002003	60	243	29	426
732	0.0002405	65	230	26	395
733	0.0001923	96	248	28	400
734	0.0002107	56	234	28	412
735	0.0002203	46	251	27	456
736	0.0002098	101	292	29	483
737	0.0001972	51	214	25	377
738	0.0002172	2	217	29	432
739	0.00021	13	225	27	437
740	0.0002044	4	200	23	396
741	0.0001921	162	297	28	432
742	0.000198	76	249	23	422
743	0.0002009	1	189	24	377
744	0.0002152	133	279	25	425
745	0.0002249	72	251	28	430
746	0.0002152	11	218	26	425
747	0.0002078	12	220	27	428
748	0.0002051	27	205	23	383
749	0.0002059	35	204	29	373
750	0.0002744	10	207	24	404
751	0.0002263	34	211	24	388
752	0.000216	14	220	24	426
753	0.0002009	49	228	27	407
754	0.0002473	0	207	24	414
755	0.000231	87	256	25	425
756	0.0002078	1	184	23	367
757	0.0002154	155	288	28	421
758	0.000218	40	229	28	418
759	0.0002198	2	197	28	392
760	0.0002145	51	250	27	449
761	0.0002012	48	233	28	418
762	0.0002134	7	206	28	405
763	0.0002203	21	230	27	439
764	0.0001912	107	272	25	437
765	0.0002052	41	238	29	435
766	0.0001866	82	230	29	378
767	0.0002044	55	236	28	417
768	0.0002196	9	210	22	411
769	0.0002175	13	213	25	413
770	0.0002001	38	205	24	372
771	0.0002034	57	228	23	399
772	0.000207	15	197	23	379
773	0.0001991	73	247	29	421
774	0.0002404	62	245	24	428
775	0.0002223	68	251	29	434
776	0.0002136	15	228	29	441
777	0.0002155	41	215	22	389
778	0.0002005	165	320	29	475
779	0.0001948	176	303	29	430
780	0.0002154	58	230	26	402
781	0.0001974	89	247	25	405
782	0.0002428	89	260	28	431
783	0.0002201	5	228	25	451
784	0.0002183	58	227	29	396
785	0.000272	9	214	29	419
786	0.0002107	148	274	25	400
787	0.0001957	103	247	28	391
788	0.00021	42	245	29	448
789	0.000209	1	212	23	423
790	0.000207	71	254	28	437
791	0.0002047	75	231	21	387
792	0.0002197	33	228	28	423
793	0.0002159	24	225	26	426
794	0.0001981	59	247	29	435
795	0.0002337	43	218	28	393
796	0.0002024	45	231	24	417
797	0.0002544	34	247	29	460
798	0.0002061	5	206	21	407
799	0.000196	81	246	25	411
800	0.0001928	72	245	29	418
801	0.0001931	122	266	26	410
802	0.0002184	13	212	27	411
803	0.0002023	86	247	26	408
804	0.000206	108	254	25	400
805	0.0002079	8	214	27	420
806	0.0002236	35	215	27	395
807	0.0002171	3	223	27	443
808	0.0002036	70	259	27	448
809	0.0002174	56	245	27	434
810	0.0002055	106	274	29	442
811	0.000243	1	210	24	419
812	0.0002157	60	245	29	430
813	0.0002266	78	265	26	452
814	0.0002129	18	211	25	404
815	0.000185	87	214	24	341
816	0.0002022	52	242	27	432
817	0.0002262	5	211	29	417
818	0.0001958	102	258	29	414
819	0.0002613	16	204	27	392
820	0.0002164	11	223	29	435
821	0.0001932	130	291	29	452
822	0.0001904	95	263	29	431
823	0.0002048	17	209	26	401
824	0.0002374	76	230	29	384
825	0.0001982	140	300	28	460
826	0.0002118	97	249	26	401
827	0.0001896	97	232	26	367
828	0.000209	13	190	28	367
829	0.0002384	24	228	25	432
830	0.0002189	19	207	29	395
831	0.0002394	2	211	25	420
832	0.0002081	50	257	28	464
833	0.0002098	44	214	29	384
834	0.0001919	103	272	29	441
835	0.0001923	66	209	29	352
836	0.0002589	61	255	29	449
837	0.0002264	6	212	26	418
838	0.0001879	86	248	29	410
839	0.0002344	48	233	28	418
840	0.0001917	97	256	29	415
841	0.0002062	24	212	22	400
842	0.0002303	22	256	27	490
843	0.0002426	41	250	25	459
844	0.0001979	102	266	27	430
845	0.0001941	114	267	29	420
846	0.0002164	36	238	26	440
847	0.0002084	19	215	29	411
848	0.0002206	49	223	20	397
849	0.0002085	78	246	27	414
850	0.0002011	24	213	26	402
851	0.0002008	41	218	29	395
852	0.0002022	101	271	29	441
853	0.0002172	7	226	27	445
854	0.0002021	53	229	26	405
855	0.0001898	87	235	29	383
856	0.0002312	91	283	28	475
857	0.0002152	139	285	28	431
858	0.0002099	14	209	25	404
859	0.0002175	91	262	28	433
860	0.0001967	89	249	29	409
861	0.0002008	148	278	27	408
862	0.0002231	27	229	27	431
863	0.000219	41	229	29	417
864	0.0002115	112	283	27	454
865	0.0002259	7	199	26	391
866	0.0002009	52	255	28	458
867	0.0002058	69	233	27	397
868	0.0002103	52	237	26	422
869	0.0001995	55	227	27	399
870	0.000204	85	259	25	433
871	0.0002177	73	244	23	415
872	0.0002608	11	223	28	435
873	0.0002255	80	229	28	378
874	0.0002105	46	227	25	408
875	0.0001923	56	224	24	392
876	0.000203	20	209	29	398
877	0.0002157	76	218	27	360
878	0.000291	28	210	23	392
879	0.0001992	83	268	29	453
880	0.0002407	29	223	23	417
881	0.0002613	14	208	29	402
882	0.0001922	90	242	25	394
883	0.000196	42	226	29	410
884	0.0002152	5	216	27	427
885	0.0001895	152	273	29	394
886	0.0002499	66	238	23	410
887	0.0002111	51	239	23	427
888	0.0002123	8	223	29	438
889	0.0002014	170	303	29	436
890	0.0002315	79	227	23	375
891	0.000197	122	262	27	402
892	0.0001916	71	225	26	379
893	0.0002261	9	224	28	439
894	0.0002132	63	245	27	427
895	0.0002096	45	255	26	465
896	0.000212	20	217	22	414
897	0.0002494	7	225	25	443
898	0.0002052	31	212	26	393
899	0.0001942	62	219	26	376
900	0.0002174	31	218	22	405
901	0.0001987	183	306	28	429
902	0.0002123	38	213	28	388
903	0.0002149	57	242	27	427
904	0.0001941	76	240	28	404
905	0.0002136	16	213	28	410
906	0.000206	67	249	26	431
907	0.0002509	82	253	25	424
908	0.0002039	122	260	26	398
909	0.0002163	54	236	28	418
910	0.0002095	62	227	21	392
911	0.000211	25	228	28	431
912	0.000239	197	314	29	431
913	0.0002609	67	252	29	437
914	0.0001954	92	258	29	424
915	0.0002463	38	240	29	442
916	0.0002145	63	243	27	423
917	0.0002052	17	204	27	391
918	0.0002111	43	223	28	403
919	0.0002486	1	200	21	399
920	0.0002049	35	199	24	363
921	0.0001991	61	229	29	397
922	0.000204	80	243	29	406
923	0.0002021	49	238	25	427
924	0.0001969	55	222	26	389
925	0.0002105	29	215	26	401
926	0.0002007	92	267	29	442
927	0.0002232	36	230	28	424
928	0.0002627	94	275	28	456
929	0.000192	100	244	24	388
930	0.0002047	48	241	28	434
931	0.0002115	28	209	24	390
932	0.0002141	95	263	26	431
933	0.0002064	70	254	28	438
934	0.0002238	5	196	24	387
935	0.0002219	27	210	26	393
936	0.0001962	125	273	28	421
937	0.0002098	74	256	28	438
938	0.0001889	145	281	27	417
939	0.000229	16	227	26	438
940	0.0002248	37	235	23	433
941	0.0001969	45	218	25	391
942	0.0002098	2	204	29	406
943	0.0002132	29	227	23	425
944	0.0002561	52	219	25	386
945	0.0002568	73	264	25	455
946	0.0002212	65	251	25	437
947	0.0002002	57	252	27	447
948	0.0001973	35	215	23	395
949	0.0001938	107	272	26	437
950	0.0001928	99	248	28	397
951	0.0002772	9	232	25	455
952	0.0002076	51	227	28	403
953	0.000187	120	260	26	400
954	0.0002337	51	238	27	425
955	0.0002231	24	210	28	396
956	0.0002099	67	258	25	449
957	0.0002293	63	237	27	411
958	0.0001954	65	241	27	417
959	0.0002202	62	256	29	450
960	0.0002249	62	251	28	440
961	0.0002172	79	258	28	437
962	0.0001935	110	281	26	452
963	0.0002061	34	210	28	386
964	0.0002034	55	225	29	395
965	0.000216	10	230	28	450
966	0.0001897	145	299	21	453
967	0.0002325	75	264	29	453
968	0.000204	2	197	21	392
969	0.0002031	11	201	26	391
970	0.0001862	162	316	28	470
971	0.0002084	10	200	26	390
972	0.0002523	46	223	26	400
973	0.0002137	26	223	24	420
974	0.0001981	29	206	24	383
975	0.0002046	102	264	28	426
976	0.0002086	18	195	28	372
977	0.0002375	135	286	29	437
978	0.0002151	53	243	27	433
979	0.0001918	116	269	23	422
980	0.0001958	118	269	29	420
981	0.0002003	82	237	24	392
982	0.0001929	52	227	23	402
983	0.0003036	2	213	24	424
984	0.0002191	28	231	24	434
985	0.0002192	55	233	25	411
986	0.0001886	122	252	29	382
987	0.0002098	89	282	27	475
988	0.0002628	59	259	29	459
989	0.0002001	61	228	29	395
990	0.0002249	8	220	29	432
991	0.0002143	21	197	28	373
992	0.0002573	31	229	28	427
993	0.0002053	59	233	25	407
994	0.000261	19	233	24	447
995	0.0002163	70	244	25	418
996	0.0002105	19	223	25	427
997	0.000234	126	274	26	422
998	0.0002102	30	230	28	430
999	0.0002067	12	205	28	398
mean	0.000214914	55.706	236.088	26.718	416.47

## Sheet: GS_Opt
	time	SEq	Bal	Reg	Egal
0	0.0004315	19	193	20	362
1	0.0004625	27	221	22	415
2	0.0004892	9	234	26	453
3	0.0004854	33	234	29	433
4	0.0004419	14	202	28	390
5	0.0004745	34	215	23	396
6	0.0004395	38	225	27	412
7	0.0004288	21	204	24	387
8	0.0004248	10	188	20	356
9	0.0005273	19	197	23	372
10	0.0004382	14	213	24	412
11	0.0004634	20	237	22	443
12	0.0004432	36	218	28	400
13	0.0004814	53	246	24	437
14	0.0004227	22	207	29	392
15	0.0004354	20	205	27	390
16	0.0004392	3	207	26	411
17	0.0004503	35	241	29	447
18	0.0004371	1	213	25	425
19	0.000458	32	238	23	444
20	0.0004324	36	224	22	412
21	0.0004554	21	215	28	409
22	0.0004487	4	210	28	410
23	0.0004024	72	234	29	396
24	0.0004296	9	203	24	378
25	0.0004501	1	235	27	454
26	0.0003981	114	282	26	445
27	0.0004211	17	202	29	385
28	0.0004144	60	233	28	406
29	0.0004443	46	224	26	402
30	0.0004713	119	285	24	451
31	0.0004615	49	242	25	428
32	0.0004569	7	216	28	420
33	0.0004537	30	231	25	427
34	0.0004012	85	243	25	401
35	0.0004344	21	197	25	373
36	0.0004103	41	203	23	355
37	0.0004509	31	243	26	455
38	0.0004228	91	240	24	389
39	0.0004106	71	231	25	389
40	0.0005122	17	215	24	413
41	0.0004345	24	218	29	412
42	0.0004758	31	218	27	405
43	0.0004896	28	221	29	414
44	0.0005376	16	225	25	420
45	0.000441	69	238	27	401
46	0.000429	14	222	23	430
47	0.0005159	7	216	29	425
48	0.0005062	8	189	27	356
49	0.0004231	56	238	28	410
50	0.0004551	31	226	23	421
51	0.0004934	67	243	29	419
52	0.0004667	33	228	28	423
53	0.0004634	13	220	24	427
54	0.0004328	25	215	27	402
55	0.0004314	51	227	27	401
56	0.0005465	8	229	26	445
57	0.0004042	2	198	21	387
58	0.0004333	25	207	29	389
59	0.0004831	67	253	24	408
60	0.0004634	84	236	26	388
61	0.0004347	15	234	27	441
62	0.0004603	18	238	28	458
63	0.0004273	11	217	23	423
64	0.0004129	55	218	26	373
65	0.000468	4	235	27	466
66	0.0004497	26	237	24	448
67	0.0004212	88	237	22	386
68	0.0004117	104	251	26	398
69	0.000418	24	194	23	364
70	0.0004399	34	216	23	388
71	0.0004052	1	195	26	382
72	0.0004431	27	234	27	441
73	0.0005013	10	214	29	418
74	0.0004562	24	217	23	410
75	0.0004317	70	259	26	427
76	0.0004433	61	276	24	461
77	0.0004488	46	205	25	364
78	0.0004855	28	202	27	376
79	0.0004415	20	207	27	394
80	0.0005201	5	237	25	449
81	0.0004268	32	215	27	383
82	0.000437	109	262	27	415
83	0.0004362	69	255	27	441
84	0.0004244	11	214	22	416
85	0.0004414	2	202	27	402
86	0.0003973	27	214	28	401
87	0.0004363	20	246	25	472
88	0.0004251	21	201	27	381
89	0.0004403	10	205	24	400
90	0.0004511	30	238	24	425
91	0.0004798	14	202	23	370
92	0.0004456	116	298	28	478
93	0.0004468	98	259	26	420
94	0.0004629	9	219	29	426
95	0.000436	29	225	26	417
96	0.0004539	5	205	23	404
97	0.0004909	53	236	28	419
98	0.0004362	22	194	26	366
99	0.0004572	9	207	27	397
100	0.0004052	35	216	27	397
101	0.000448	83	237	26	391
102	0.0004207	46	214	26	372
103	0.0004499	43	232	28	421
104	0.0005079	72	233	29	394
105	0.0005101	36	223	25	410
106	0.0004788	42	230	29	418
107	0.0004509	35	207	25	379
108	0.0004188	32	222	27	412
109	0.0004928	9	224	29	439
110	0.0005069	42	256	26	470
111	0.000448	25	208	27	391
112	0.0004465	14	221	27	414
113	0.0004554	71	245	25	419
114	0.0004494	10	230	29	441
115	0.000409	9	204	24	390
116	0.000446	110	279	27	448
117	0.0004197	73	246	25	419
118	0.0004317	15	195	25	375
119	0.0004487	36	246	29	453
120	0.000494	49	242	29	435
121	0.0004462	70	236	26	401
122	0.0005041	6	203	24	400
123	0.0004561	39	241	24	442
124	0.0004437	64	267	28	437
125	0.0004467	41	233	23	403
126	0.0004249	31	217	26	381
127	0.0004546	40	249	25	458
128	0.0004057	40	209	27	378
129	0.0004401	13	221	29	429
130	0.0004992	16	232	28	448
131	0.0004281	26	213	27	400
132	0.000457	55	224	23	388
133	0.000442	25	223	27	421
134	0.0004393	51	205	27	359
135	0.0004335	15	197	20	379
136	0.000469	13	225	26	415
137	0.0004287	85	244	26	403
138	0.0004788	17	234	25	449
139	0.0004958	20	200	27	380
140	0.0004131	19	204	23	380
141	0.0004186	51	240	28	429
142	0.0004168	33	211	24	389
143	0.0004889	11	209	28	397
144	0.0004936	19	223	24	427
145	0.0003992	16	198	24	380
146	0.0004445	13	220	27	427
147	0.0004356	25	227	26	419
148	0.0004115	15	206	25	396
149	0.0004525	23	253	27	483
150	0.0004228	21	199	25	377
151	0.0004423	2	209	26	416
152	0.0004621	18	233	20	417
153	0.0004108	8	214	28	420
154	0.0004848	4	199	26	394
155	0.0004785	31	240	28	435
156	0.0004309	40	217	26	394
157	0.0004131	43	220	27	397
158	0.0004659	68	248	28	428
159	0.0004564	26	224	22	405
160	0.0004747	38	220	28	402
161	0.0004456	47	198	27	349
162	0.0004637	24	227	24	426
163	0.0004638	27	227	23	427
164	0.0004675	18	222	23	406
165	0.0004121	28	242	27	441
166	0.0004375	25	195	28	354
167	0.0004452	16	231	26	446
168	0.0004568	22	205	29	388
169	0.0005622	0	208	28	416
170	0.0004174	13	203	29	382
171	0.0004242	28	212	20	396
172	0.0004014	97	262	28	427
173	0.0004249	11	209	26	398
174	0.000418	23	230	29	437
175	0.0004421	0	214	27	422
176	0.000522	16	230	27	441
177	0.0004603	3	220	27	437
178	0.0004391	59	236	28	413
179	0.0005202	32	217	24	402
180	0.0004332	75	256	27	437
181	0.0004153	2	202	25	402
182	0.000479	78	270	28	462
183	0.0005001	24	246	26	464
184	0.0004329	44	213	24	381
185	0.0004738	25	253	29	481
186	0.0004912	28	221	28	414
187	0.0004296	26	234	25	442
188	0.0004157	51	213	27	375
189	0.0004321	36	186	27	336
190	0.0004288	150	256	28	362
191	0.0004741	9	220	25	431
192	0.0004568	44	237	28	430
193	0.0004318	40	209	27	378
194	0.0004621	16	219	28	420
195	0.0004172	4	169	24	334
196	0.0004482	30	219	29	408
197	0.0004669	9	216	24	423
198	0.0004458	28	231	26	417
199	0.0004737	7	223	28	439
200	0.0004575	5	202	26	395
201	0.0004517	50	245	28	440
202	0.000482	26	236	27	435
203	0.0004368	11	212	29	400
204	0.0004294	56	230	28	404
205	0.0004752	84	244	29	403
206	0.0004742	48	231	29	409
207	0.0004267	100	252	28	404
208	0.0004347	25	214	28	403
209	0.0004319	7	209	22	411
210	0.0004628	37	222	27	407
211	0.000469	34	215	26	396
212	0.0004439	8	213	24	418
213	0.0004456	34	223	29	412
214	0.000464	38	218	28	398
215	0.0004451	5	209	25	402
216	0.0004829	21	216	25	402
217	0.000473	18	230	25	431
218	0.0004287	48	241	25	424
219	0.0004544	43	265	27	451
220	0.0004361	40	233	26	412
221	0.0004492	49	218	27	387
222	0.0004199	15	200	22	385
223	0.0004563	60	219	28	378
224	0.00044	46	239	29	432
225	0.0004163	57	220	29	380
226	0.0004147	20	200	28	378
227	0.0004247	61	248	24	435
228	0.0003828	80	239	25	398
229	0.0004364	47	230	22	413
230	0.0004375	59	235	27	411
231	0.0004686	16	222	27	427
232	0.0004087	67	225	22	383
233	0.0004636	23	227	28	406
234	0.0005302	17	223	28	419
235	0.0004502	26	237	23	448
236	0.0004609	29	239	25	449
237	0.0004492	32	222	25	412
238	0.0004267	76	246	29	416
239	0.0004271	6	221	28	436
240	0.000412	92	254	27	414
241	0.0004048	67	233	25	399
242	0.0004046	39	225	24	392
243	0.0004195	108	273	26	438
244	0.0004156	20	208	29	396
245	0.0004367	12	213	23	399
246	0.0004424	40	218	27	396
247	0.0004145	6	198	25	390
248	0.0004062	51	231	28	411
249	0.0004512	4	201	26	398
250	0.0004251	67	218	23	369
251	0.0004345	16	221	24	425
252	0.0005262	25	223	25	421
253	0.0004132	24	216	22	385
254	0.0004811	3	184	28	365
255	0.0004498	85	221	23	357
256	0.0004043	76	250	26	416
257	0.00045	1	215	27	429
258	0.000445	64	231	29	398
259	0.000451	20	224	27	428
260	0.0004889	5	197	27	389
261	0.000407	6	209	25	412
262	0.000434	30	229	27	428
263	0.0004518	6	205	24	400
264	0.0004528	51	241	26	431
265	0.0004639	50	263	25	472
266	0.000412	84	246	26	402
267	0.0004261	13	190	25	367
268	0.0004528	43	218	24	390
269	0.0004037	14	211	23	406
270	0.0004277	31	211	26	381
271	0.0004286	6	191	25	376
272	0.0004286	22	203	19	384
273	0.0004439	36	243	23	436
274	0.000495	11	205	23	399
275	0.0004656	58	242	26	413
276	0.0004877	27	214	28	401
277	0.0004454	13	215	26	417
278	0.0004356	47	240	27	409
279	0.0004027	22	216	24	410
280	0.0004904	56	238	25	420
281	0.0004343	24	188	29	352
282	0.0004384	1	224	28	447
283	0.0004133	37	230	26	418
284	0.0004615	3	213	28	423
285	0.0004149	74	246	26	418
286	0.0004335	53	239	28	425
287	0.0004219	30	225	29	410
288	0.0004207	36	200	28	364
289	0.000436	14	185	26	356
290	0.0004587	53	260	27	467
291	0.0004587	29	221	24	413
292	0.0004325	47	242	25	426
293	0.0004514	29	225	25	421
294	0.0004589	13	209	26	405
295	0.0004792	16	231	28	444
296	0.000399	65	227	29	389
297	0.0004922	25	227	27	429
298	0.0004546	61	264	24	460
299	0.0004414	19	215	24	411
300	0.0004083	107	261	26	415
301	0.0004656	16	220	27	382
302	0.0004314	64	237	21	410
303	0.0004583	19	222	29	425
304	0.0004173	45	230	29	410
305	0.0004409	27	232	28	424
306	0.0004739	67	265	29	455
307	0.0004729	22	247	25	472
308	0.0005122	68	245	28	422
309	0.0003925	148	286	29	424
310	0.0004923	95	261	26	427
311	0.0004387	26	236	26	446
312	0.0004335	11	202	23	393
313	0.000449	11	231	24	444
314	0.0004507	27	205	29	383
315	0.0004712	43	199	29	355
316	0.0004077	24	232	27	406
317	0.0005244	30	229	28	428
318	0.0004361	39	222	20	391
319	0.0004399	123	266	27	409
320	0.0004189	51	252	24	450
321	0.0004911	15	210	28	405
322	0.0004515	54	250	27	446
323	0.0004389	80	245	26	409
324	0.0004378	36	257	28	458
325	0.0004332	32	207	25	373
326	0.0004261	7	198	19	389
327	0.0004475	8	204	24	400
328	0.0004453	11	201	26	391
329	0.0004296	0	193	19	386
330	0.0004389	65	241	24	417
331	0.0004647	9	243	28	474
332	0.0004633	89	248	26	407
333	0.0004101	39	211	26	383
334	0.0005094	5	211	24	417
335	0.0004449	19	229	24	439
336	0.0004092	22	196	24	353
337	0.0004316	110	272	28	419
338	0.0004577	107	279	26	445
339	0.0004099	14	190	28	366
340	0.0004045	112	282	26	430
341	0.0004511	23	229	29	435
342	0.0004333	13	194	24	375
343	0.0004228	25	221	29	417
344	0.0004458	49	263	28	469
345	0.0004618	36	257	29	477
346	0.0004211	7	202	27	390
347	0.0004719	26	209	22	392
348	0.0004251	38	242	28	444
349	0.0004394	31	210	25	389
350	0.0004965	66	243	27	405
351	0.0004821	42	236	29	430
352	0.0004462	41	216	27	381
353	0.0004573	36	200	29	364
354	0.0004544	31	237	28	443
355	0.0005032	7	225	29	443
356	0.0004284	16	214	27	412
357	0.0003922	108	249	29	387
358	0.0004433	30	238	28	431
359	0.0004379	18	204	25	390
360	0.0004111	60	221	24	382
361	0.0004485	20	210	28	400
362	0.0003976	3	182	23	361
363	0.0004436	22	234	23	428
364	0.0004501	14	208	29	397
365	0.0004933	61	218	27	375
366	0.0004063	62	226	25	381
367	0.0004093	63	238	25	411
368	0.0004476	10	210	23	410
369	0.0004661	79	269	29	459
370	0.0004782	10	207	29	404
371	0.0004697	29	219	28	409
372	0.0004543	8	227	26	446
373	0.0004313	3	197	29	389
374	0.0004626	35	239	25	430
375	0.0004592	13	217	26	397
376	0.0004559	44	256	27	459
377	0.0004743	60	236	24	406
378	0.0004709	23	229	24	412
379	0.000426	56	231	28	406
380	0.0004383	27	212	24	397
381	0.0004403	24	222	24	420
382	0.0004345	49	218	26	387
383	0.0004524	28	228	29	428
384	0.0004693	102	277	25	452
385	0.000448	29	233	26	437
386	0.0004295	31	218	28	399
387	0.0004384	10	210	25	400
388	0.0004003	119	275	26	426
389	0.0004318	12	201	29	377
390	0.0004644	77	218	29	359
391	0.0004476	10	215	28	420
392	0.0004512	30	226	27	395
393	0.0004289	61	239	28	417
394	0.0004519	86	223	29	360
395	0.00044	50	206	28	362
396	0.0004441	6	212	28	418
397	0.0004287	18	216	27	392
398	0.0004235	24	214	28	404
399	0.0004578	53	244	29	435
400	0.0004036	63	245	27	411
401	0.0004638	3	183	29	363
402	0.0004713	16	212	28	408
403	0.0004821	13	203	27	393
404	0.0004449	63	247	26	431
405	0.000448	15	223	28	399
406	0.0004211	16	224	27	432
407	0.0004539	8	203	26	398
408	0.0004587	5	218	28	430
409	0.0004596	27	215	24	403
410	0.0004718	11	231	25	451
411	0.0004756	52	230	29	408
412	0.0004463	1	206	25	411
413	0.0004599	34	247	27	438
414	0.0004407	32	238	26	439
415	0.0004594	26	212	27	398
416	0.0004417	59	220	29	381
417	0.000563	49	237	29	425
418	0.0004697	65	253	29	437
419	0.0004222	14	204	25	394
420	0.0004756	6	201	27	396
421	0.0004288	32	220	28	408
422	0.0004693	4	240	29	476
423	0.0004412	10	190	24	370
424	0.0004294	14	206	24	398
425	0.0004382	1	232	27	432
426	0.0004487	32	226	24	420
427	0.0004188	13	191	26	369
428	0.0004249	9	207	26	405
429	0.0004375	42	236	29	430
430	0.0004278	14	215	24	402
431	0.0004214	54	255	29	456
432	0.0005143	2	226	24	448
433	0.0004569	25	234	23	443
434	0.0004265	47	234	27	421
435	0.0004348	65	243	27	416
436	0.0005425	66	248	27	430
437	0.0004628	11	228	24	445
438	0.0004374	14	211	29	408
439	0.000436	91	239	27	387
440	0.0004305	16	220	25	424
441	0.0004246	3	198	28	386
442	0.0004486	22	225	26	424
443	0.0004603	23	235	23	447
444	0.0004259	37	215	24	393
445	0.0004621	24	212	23	395
446	0.0004106	59	236	27	413
447	0.0004379	80	254	27	428
448	0.0004404	9	213	29	417
449	0.0005227	71	248	28	425
450	0.0004542	113	277	23	441
451	0.0004728	1	218	24	435
452	0.0004499	53	216	26	374
453	0.000495	36	210	26	384
454	0.0004567	24	203	25	382
455	0.0005112	38	209	29	380
456	0.0004681	50	233	27	416
457	0.0004268	22	217	26	412
458	0.0004656	25	212	27	399
459	0.0004313	4	202	29	400
460	0.000435	36	229	22	422
461	0.0004442	34	217	26	400
462	0.000468	2	190	26	378
463	0.0004555	106	272	28	438
464	0.0004659	32	229	29	426
465	0.0004452	87	263	27	439
466	0.0005091	2	199	22	396
467	0.0004002	31	213	27	395
468	0.0004191	84	255	28	404
469	0.0004285	39	209	27	373
470	0.0004579	27	214	27	401
471	0.0004365	36	225	27	393
472	0.0004341	10	234	26	458
473	0.0004505	17	226	27	417
474	0.0004619	105	251	25	397
475	0.0005355	10	241	24	472
476	0.0004618	47	239	27	431
477	0.0004243	1	185	27	350
478	0.0004086	95	255	28	414
479	0.0004265	39	230	28	421
480	0.0004349	14	221	25	428
481	0.0004663	40	225	22	410
482	0.0004414	11	221	26	431
483	0.0004865	40	220	28	400
484	0.0004438	17	184	23	351
485	0.0004229	21	203	26	385
486	0.0004069	15	192	26	346
487	0.0004433	57	225	20	393
488	0.000465	55	248	27	441
489	0.0004209	82	253	24	424
490	0.0004291	118	268	24	418
491	0.0004376	32	239	27	446
492	0.0004294	52	232	29	412
493	0.0004426	30	250	26	458
494	0.0004442	27	232	25	432
495	0.0004212	44	237	27	430
496	0.0004385	48	243	25	438
497	0.00039	1	180	26	359
498	0.0004491	22	232	27	442
499	0.0004859	21	219	27	417
500	0.0004166	36	215	26	390
501	0.0004533	22	247	25	464
502	0.0004512	78	250	29	422
503	0.0004421	45	239	28	431
504	0.0004681	1	210	29	419
505	0.0004238	20	208	23	396
506	0.0004437	52	222	29	392
507	0.0004448	49	223	24	389
508	0.0004387	56	235	26	414
509	0.0004435	62	241	26	420
510	0.0004461	80	263	28	446
511	0.0004557	61	243	24	425
512	0.0004732	12	234	27	456
513	0.0004549	44	223	27	402
514	0.0004691	27	226	28	408
515	0.0004466	8	220	28	432
516	0.0004607	84	284	27	484
517	0.0004409	2	223	25	436
518	0.0004524	6	227	27	448
519	0.0004469	24	234	29	444
520	0.0004535	72	244	29	416
521	0.0004951	25	242	28	459
522	0.0004679	48	223	28	398
523	0.0004464	11	223	28	435
524	0.0004521	44	216	26	388
525	0.00043	39	218	26	397
526	0.0004403	4	187	22	370
527	0.0004479	7	206	29	405
528	0.000466	75	261	29	447
529	0.0004331	11	198	26	377
530	0.0004108	83	223	26	362
531	0.000475	16	220	23	421
532	0.0004236	51	221	28	391
533	0.0004306	40	220	25	400
534	0.0004246	68	219	29	370
535	0.0005415	39	214	24	389
536	0.0004794	22	202	29	378
537	0.000548	45	247	27	449
538	0.0004488	10	175	24	340
539	0.000458	35	232	29	426
540	0.0004215	2	206	25	410
541	0.0004477	78	256	27	434
542	0.0004524	30	211	25	391
543	0.0004197	38	231	26	424
544	0.0004261	78	260	27	437
545	0.0004264	21	211	27	392
546	0.0005036	58	272	25	462
547	0.000446	90	254	27	418
548	0.0004574	1	219	27	432
549	0.0004691	40	223	27	406
550	0.0004261	12	187	26	362
551	0.0004317	37	213	24	384
552	0.0004356	29	206	27	383
553	0.0005133	19	207	23	395
554	0.0004605	12	204	29	396
555	0.0004649	26	247	25	468
556	0.0004551	118	276	28	434
557	0.0004663	4	201	27	398
558	0.0005004	45	249	26	453
559	0.0004436	57	222	26	379
560	0.0004437	27	220	24	413
561	0.000441	50	247	29	439
562	0.00047	30	237	25	444
563	0.0004081	103	272	27	441
564	0.0004454	9	184	25	359
565	0.0004287	47	246	23	445
566	0.000438	2	206	27	404
567	0.0004735	9	192	22	375
568	0.0004106	34	224	27	404
569	0.0004965	32	231	28	417
570	0.0004555	27	211	27	395
571	0.000404	12	202	24	392
572	0.0004792	59	240	29	421
573	0.0004032	80	249	28	393
574	0.0004553	21	204	25	387
575	0.0004658	87	265	26	443
576	0.0003915	102	270	27	430
577	0.0003986	1	162	25	323
578	0.0004336	27	237	27	447
579	0.0004326	22	201	26	380
580	0.0004301	59	237	25	415
581	0.0004212	17	216	27	415
582	0.000427	29	222	22	415
583	0.0004218	13	204	21	395
584	0.0005051	37	251	24	465
585	0.0004546	38	221	28	404
586	0.0004399	10	203	22	396
587	0.0004586	34	239	26	438
588	0.0004845	170	280	28	390
589	0.0004403	3	211	26	417
590	0.0004502	19	202	28	385
591	0.0004012	53	220	29	384
592	0.0004506	69	243	29	417
593	0.0004417	36	203	22	370
594	0.000434	9	206	28	397
595	0.0004106	41	256	26	471
596	0.0004641	24	225	28	426
597	0.000441	23	221	25	419
598	0.0004671	14	194	23	374
599	0.0004348	65	241	28	396
600	0.0004746	77	264	28	451
601	0.0004468	79	262	28	444
602	0.000415	3	184	29	361
603	0.0004158	128	277	27	422
604	0.0004059	68	244	27	420
605	0.0004391	43	239	28	435
606	0.0004556	66	245	26	423
607	0.0005949	22	231	26	429
608	0.0004475	38	228	27	400
609	0.0004125	36	223	26	410
610	0.0004483	28	226	24	398
611	0.0004577	16	220	26	424
612	0.000443	44	216	27	388
613	0.0004461	43	221	23	399
614	0.0004555	3	214	27	421
615	0.0004494	51	249	27	447
616	0.0004235	69	224	29	379
617	0.0004984	8	223	27	438
618	0.000441	11	204	27	397
619	0.0004319	38	199	24	360
620	0.0005061	40	223	25	372
621	0.0004448	56	220	28	368
622	0.0004553	28	221	26	408
623	0.0004688	18	216	24	414
624	0.0004375	8	215	28	413
625	0.0004689	17	231	22	438
626	0.0004232	19	218	28	409
627	0.0004143	8	188	26	353
628	0.0004299	52	222	26	392
629	0.0005012	60	251	25	442
630	0.0004536	7	206	26	405
631	0.0004542	33	233	23	433
632	0.0004095	39	219	24	394
633	0.0004608	21	244	28	446
634	0.0004387	43	235	24	419
635	0.0004242	68	241	27	414
636	0.0004856	85	264	27	443
637	0.00042	5	206	29	406
638	0.0004454	10	221	26	417
639	0.0004106	28	212	25	396
640	0.0004098	43	236	25	429
641	0.0004408	2	212	26	421
642	0.000489	40	213	28	386
643	0.0004712	24	220	28	416
644	0.0004891	15	242	28	469
645	0.0004183	61	234	23	407
646	0.0004292	15	215	23	402
647	0.0004531	49	230	27	411
648	0.0004543	95	262	29	429
649	0.0005154	5	229	25	453
650	0.0004488	88	278	27	431
651	0.0004748	9	214	24	415
652	0.0004767	40	230	28	420
653	0.0004688	22	230	29	423
654	0.0004297	52	227	26	402
655	0.000434	26	234	29	439
656	0.0004214	25	224	27	423
657	0.0004998	25	228	26	426
658	0.0004577	25	207	28	387
659	0.0004569	52	216	23	380
660	0.0004112	63	233	28	403
661	0.0006332	35	219	22	399
662	0.0004968	11	200	27	357
663	0.0004523	7	206	27	405
664	0.0004285	45	233	27	411
665	0.0004355	26	220	28	395
666	0.0004271	18	204	29	390
667	0.0004198	51	253	24	433
668	0.000387	49	210	29	348
669	0.0004425	27	219	23	403
670	0.0004283	1	221	28	441
671	0.0004461	54	235	24	416
672	0.0004778	120	289	26	458
673	0.000461	115	285	25	449
674	0.0005038	50	245	27	440
675	0.0004133	62	251	26	440
676	0.0004561	15	229	25	439
677	0.0004532	11	203	28	395
678	0.0004891	28	211	27	377
679	0.0004216	52	239	26	426
680	0.0004506	37	217	26	397
681	0.0004114	10	203	27	396
682	0.0004878	43	237	25	431
683	0.0004049	70	227	24	384
684	0.0004551	43	213	29	383
685	0.00045	21	201	26	381
686	0.0004528	11	211	28	406
687	0.0004069	10	214	26	418
688	0.0004307	88	247	26	406
689	0.0004312	113	258	27	403
690	0.0004413	55	241	29	419
691	0.0004354	58	223	26	388
692	0.0004449	74	263	28	452
693	0.0004044	55	215	27	373
694	0.0004493	50	234	29	418
695	0.0005397	77	248	26	419
696	0.0004635	37	242	28	444
697	0.0004174	17	224	29	431
698	0.0004901	10	217	28	424
699	0.0004638	66	235	29	403
700	0.0004372	6	230	27	448
701	0.0004606	42	234	26	426
702	0.0005073	35	228	24	419
703	0.0004349	34	208	27	382
704	0.0004179	10	203	27	393
705	0.0004419	58	207	27	356
706	0.0004354	19	219	25	385
707	0.000458	10	225	28	415
708	0.0004281	59	238	24	417
709	0.0004756	27	225	27	423
710	0.0004497	49	244	26	439
711	0.0004178	91	236	28	381
712	0.0004241	56	243	25	420
713	0.000427	13	215	27	391
714	0.0004339	33	234	25	435
715	0.0004142	26	200	27	374
716	0.0004298	39	219	29	399
717	0.0003971	17	189	22	361
718	0.0004483	20	222	29	424
719	0.0003886	12	188	25	364
720	0.0004676	8	215	25	422
721	0.0005124	9	208	27	407
722	0.0004102	59	234	23	396
723	0.0004884	4	215	26	426
724	0.0004314	33	213	26	384
725	0.000444	106	251	28	396
726	0.0004747	57	245	29	433
727	0.0004802	32	220	26	398
728	0.0004055	2	188	28	374
729	0.0004552	14	222	26	430
730	0.0004412	83	251	29	419
731	0.0004285	26	224	23	422
732	0.0004389	65	230	26	395
733	0.0004371	58	226	28	394
734	0.0004278	5	208	27	411
735	0.0004812	46	251	27	456
736	0.0005026	37	240	28	443
737	0.0004343	51	214	24	377
738	0.0004276	2	217	29	432
739	0.0004713	1	220	27	437
740	0.0004263	4	200	23	396
741	0.0004329	10	203	28	396
742	0.0004219	12	225	23	422
743	0.0004282	1	189	24	377
744	0.000457	108	267	23	425
745	0.0004725	72	251	28	430
746	0.0004403	11	218	26	425
747	0.0004492	12	220	27	428
748	0.0004435	27	205	23	383
749	0.0004098	27	188	24	349
750	0.0004802	10	207	24	404
751	0.0004828	7	206	24	388
752	0.0004461	14	220	24	426
753	0.000428	49	228	27	401
754	0.0004874	0	207	24	414
755	0.000478	44	238	25	425
756	0.0004904	1	184	23	367
757	0.0004304	24	198	27	372
758	0.0004126	40	229	28	401
759	0.0004642	2	197	28	387
760	0.0004428	51	250	27	449
761	0.0004638	28	233	28	418
762	0.0004444	7	206	28	405
763	0.0004631	21	230	27	439
764	0.0004329	52	236	25	420
765	0.0004172	0	213	26	426
766	0.0004577	30	215	29	378
767	0.0004328	21	213	24	405
768	0.0004291	9	210	22	411
769	0.0004433	13	213	25	413
770	0.0004828	38	205	24	372
771	0.0004406	1	205	23	399
772	0.0004194	15	197	23	379
773	0.0004495	4	223	28	421
774	0.000474	62	245	24	428
775	0.0004142	68	251	28	434
776	0.0004033	15	228	28	430
777	0.0004415	9	206	22	389
778	0.0004389	0	206	28	412
779	0.0004288	83	252	22	421
780	0.0004586	58	230	26	401
781	0.0004759	63	230	24	397
782	0.0004906	70	247	28	424
783	0.0004473	5	228	25	451
784	0.0004344	58	227	29	396
785	0.0004965	9	214	29	419
786	0.0004868	81	246	25	400
787	0.0004519	37	208	28	379
788	0.0004183	42	245	28	418
789	0.0004243	1	212	23	423
790	0.0004564	71	254	27	431
791	0.0004842	75	231	21	387
792	0.0004826	33	219	28	399
793	0.0004404	24	225	26	426
794	0.0004387	59	237	29	410
795	0.0004644	43	218	26	393
796	0.0004305	45	231	24	417
797	0.0004883	1	227	29	453
798	0.0004702	5	206	21	402
799	0.0004145	81	246	25	411
800	0.0004268	67	231	25	395
801	0.0004307	26	210	26	394
802	0.000518	13	212	27	395
803	0.0004311	68	237	26	406
804	0.0004476	46	210	25	374
805	0.0004656	8	214	27	420
806	0.0004857	35	215	27	395
807	0.0004403	3	223	26	435
808	0.0004284	70	259	27	435
809	0.0004559	56	245	27	413
810	0.0004634	65	251	29	437
811	0.0004479	1	210	24	419
812	0.000478	40	224	29	408
813	0.0004499	78	265	25	452
814	0.0004433	18	211	25	404
815	0.000416	44	202	24	341
816	0.000429	22	227	27	432
817	0.0004445	5	211	29	417
818	0.0003944	102	258	29	414
819	0.0004765	16	202	26	379
820	0.0004109	11	223	28	427
821	0.0004624	57	255	29	452
822	0.0004221	88	261	26	431
823	0.0004531	17	209	26	396
824	0.0005057	27	201	29	375
825	0.0004033	29	221	26	413
826	0.0004425	54	229	26	401
827	0.000406	81	226	26	367
828	0.0004205	13	190	28	367
829	0.0004938	24	228	25	432
830	0.0004885	19	207	29	394
831	0.0004808	2	211	25	420
832	0.0004581	10	242	25	464
833	0.0004254	44	214	29	384
834	0.0004348	73	257	28	441
835	0.0004058	46	199	26	352
836	0.000485	48	244	29	440
837	0.000505	6	212	24	415
838	0.0004159	24	206	24	388
839	0.0004553	48	233	28	418
840	0.0004559	97	256	29	415
841	0.000422	24	212	22	400
842	0.00045	22	256	27	468
843	0.0004685	41	250	25	459
844	0.0004443	47	225	24	403
845	0.0004215	17	220	25	420
846	0.0004275	36	238	26	428
847	0.0004679	19	215	28	411
848	0.0004639	49	223	20	397
849	0.0005059	45	238	23	414
850	0.0004143	5	194	26	383
851	0.0004514	13	201	28	389
852	0.0004621	7	217	29	427
853	0.0004923	7	226	27	445
854	0.0004293	25	205	26	385
855	0.0004277	52	213	26	374
856	0.0004725	91	283	28	475
857	0.0004705	27	226	26	425
858	0.0004074	14	209	25	396
859	0.000417	91	262	28	433
860	0.000414	9	200	29	391
861	0.0004542	9	208	23	407
862	0.0004451	27	229	27	431
863	0.0004749	41	229	29	417
864	0.0004392	1	212	24	423
865	0.0004179	7	199	26	391
866	0.0004373	33	235	28	437
867	0.0004521	7	197	26	387
868	0.0004249	44	235	26	422
869	0.0004257	55	227	27	399
870	0.0004594	85	259	25	433
871	0.000508	44	225	23	406
872	0.0004763	11	223	28	435
873	0.0004429	80	229	28	378
874	0.0004077	46	227	25	408
875	0.0003975	16	200	23	384
876	0.0004142	3	202	27	398
877	0.0004396	76	218	27	350
878	0.0005087	28	209	23	382
879	0.0004662	83	268	29	453
880	0.0005038	29	223	23	417
881	0.000474	14	208	29	388
882	0.000426	81	237	25	393
883	0.0004732	42	226	27	402
884	0.000474	5	216	27	400
885	0.0004508	29	220	22	394
886	0.0004537	66	238	23	410
887	0.0004521	19	226	21	427
888	0.0004212	8	223	28	421
889	0.0003949	114	264	29	414
890	0.0004286	79	227	23	367
891	0.0004262	7	194	27	381
892	0.000422	11	190	26	369
893	0.0004639	9	224	23	439
894	0.0004531	5	214	23	423
895	0.000476	10	242	26	465
896	0.0004659	20	217	22	414
897	0.0004864	7	225	25	443
898	0.0004185	31	212	26	393
899	0.0004233	6	186	26	366
900	0.0004459	31	218	22	392
901	0.0004375	48	226	25	404
902	0.0004793	38	213	28	388
903	0.0004663	57	242	27	427
904	0.0004414	76	240	28	404
905	0.0004774	16	213	26	410
906	0.0004336	22	223	25	424
907	0.0005085	38	241	25	424
908	0.0004518	48	220	23	392
909	0.0004869	28	229	26	418
910	0.0004176	62	227	21	392
911	0.0004425	25	228	28	431
912	0.0004814	1	223	27	431
913	0.0005239	67	252	28	437
914	0.0004437	20	215	25	410
915	0.0004808	38	234	28	430
916	0.0004804	63	243	27	423
917	0.000423	17	204	27	391
918	0.0004441	43	223	28	391
919	0.0004752	1	200	21	399
920	0.0004056	35	199	23	363
921	0.0004113	1	199	27	397
922	0.0004622	47	232	25	406
923	0.0004319	49	238	24	427
924	0.000457	0	206	26	389
925	0.0004435	29	215	26	401
926	0.0004528	92	267	29	442
927	0.0004457	26	214	26	402
928	0.0004924	94	263	27	428
929	0.0004029	100	244	24	388
930	0.0004236	48	241	26	413
931	0.000454	28	209	24	390
932	0.0004592	15	223	26	431
933	0.0004652	11	216	26	421
934	0.0004766	5	196	24	387
935	0.0004324	27	210	26	393
936	0.0004309	62	230	27	398
937	0.0004775	74	256	28	438
938	0.0004071	47	223	24	399
939	0.0004909	16	226	26	418
940	0.0004577	37	235	23	419
941	0.0004455	40	215	25	390
942	0.0004325	2	204	29	406
943	0.0004476	29	227	23	425
944	0.0005091	52	219	25	386
945	0.0004876	45	249	25	453
946	0.0004743	65	251	25	437
947	0.0004878	15	226	27	437
948	0.0004703	19	206	23	393
949	0.0004503	36	229	22	422
950	0.0004051	99	248	27	397
951	0.0005174	9	232	25	455
952	0.0004198	51	227	28	388
953	0.0004245	50	240	26	400
954	0.0004769	51	238	27	425
955	0.0004718	24	210	28	396
956	0.0004609	31	237	23	443
957	0.0004529	63	237	27	393
958	0.0004387	10	219	25	417
959	0.0004893	30	238	25	446
960	0.0005019	38	238	25	438
961	0.000438	18	223	28	428
962	0.0004552	51	258	26	452
963	0.0004178	34	210	28	380
964	0.0004316	39	216	29	393
965	0.0004487	10	230	28	450
966	0.0004885	145	299	21	453
967	0.0004503	75	264	29	453
968	0.00042	2	197	21	392
969	0.0004322	11	201	26	391
970	0.0004635	162	316	28	470
971	0.0004165	10	200	25	390
972	0.0004987	24	222	23	400
973	0.0004337	26	223	24	420
974	0.0004029	29	206	24	370
975	0.0004332	81	260	28	426
976	0.0004321	18	195	28	372
977	0.0004562	17	200	29	383
978	0.0004835	32	232	27	432
979	0.0003972	116	269	23	422
980	0.0004393	100	269	27	420
981	0.0004281	56	224	24	392
982	0.0004115	52	227	23	402
983	0.0005201	2	213	24	424
984	0.000439	28	231	24	434
985	0.0004213	55	233	25	411
986	0.0004845	104	239	29	374
987	0.0004897	50	265	27	475
988	0.0004581	59	259	27	432
989	0.0004025	61	228	24	392
990	0.0004404	8	220	28	431
991	0.0004196	21	194	28	366
992	0.0005033	31	229	28	427
993	0.0004134	59	233	25	407
994	0.000495	19	233	24	441
995	0.0004202	70	244	25	418
996	0.0005175	19	223	25	417
997	0.0004628	74	250	26	422
998	0.0004066	30	230	25	430
999	0.0004983	12	205	28	398
mean	0.000448764	36.562	225.492	26.118	410.831

## Sheet: PolyMin_SEq
	time	SEq	Bal	Reg	Egal
0	0.0029733	42	202	20	362
1	0.0032647	7	222	22	437
2	0.0030256	55	254	26	453
3	0.003024	6	215	27	424
4	0.0029195	14	202	28	390
5	0.0029823	34	215	23	396
6	0.0031588	4	198	27	392
7	0.0031926	5	192	24	379
8	0.0035778	42	199	20	356
9	0.0030825	32	202	23	372
10	0.0032978	14	213	24	412
11	0.0031111	20	237	22	454
12	0.0028851	36	218	28	400
13	0.0030543	79	258	24	437
14	0.002985	22	207	29	392
15	0.002997	20	205	27	390
16	0.0030923	3	207	26	411
17	0.0028254	35	241	29	447
18	0.0031157	1	213	25	425
19	0.0031706	5	220	23	435
20	0.003398	36	224	22	412
21	0.0030514	3	206	28	409
22	0.0029907	4	210	28	416
23	0.0032268	18	197	24	376
24	0.0032649	9	203	24	397
25	0.0031549	60	256	27	452
26	0.0036464	44	234	27	424
27	0.002913	49	217	29	385
28	0.0034467	8	210	24	412
29	0.0030884	46	224	26	402
30	0.0028675	119	285	24	451
31	0.0032142	20	237	25	454
32	0.0030103	66	243	28	420
33	0.0031036	30	231	25	432
34	0.0031618	85	243	28	401
35	0.003248	21	197	25	373
36	0.0030343	51	203	23	355
37	0.0030562	31	243	28	455
38	0.002982	91	240	24	389
39	0.0032284	20	207	24	394
40	0.0054443	17	215	24	413
41	0.0029847	24	218	29	412
42	0.0027057	31	218	27	405
43	0.0031017	28	221	29	414
44	0.003031	38	231	24	424
45	0.0029328	85	243	27	401
46	0.0033271	14	222	23	430
47	0.0027565	7	216	29	425
48	0.0030679	8	189	27	370
49	0.0029972	52	227	28	402
50	0.0029162	31	226	23	421
51	0.0031969	67	243	29	419
52	0.0033139	33	228	29	423
53	0.0029058	13	220	24	427
54	0.0032406	25	215	27	405
55	0.0031851	51	227	27	403
56	0.0030183	23	234	26	445
57	0.0030261	2	198	21	394
58	0.002993	25	207	29	389
59	0.0033267	82	242	24	402
60	0.0028889	84	236	26	388
61	0.0031177	60	250	25	440
62	0.0028441	18	238	28	458
63	0.0029695	11	217	23	423
64	0.0031011	10	194	25	378
65	0.0030367	46	262	27	478
66	0.0028364	26	237	24	448
67	0.0029288	88	237	22	386
68	0.0032299	104	251	26	398
69	0.0032289	24	194	23	364
70	0.0030483	66	227	23	388
71	0.0029368	30	206	26	382
72	0.0031723	27	234	27	441
73	0.0030666	10	214	29	418
74	0.0028937	24	217	23	410
75	0.0032668	64	245	25	426
76	0.003287	84	271	24	458
77	0.0032096	46	205	25	364
78	0.0030971	28	202	27	376
79	0.0030868	20	207	27	394
80	0.0030535	5	237	25	469
81	0.0029682	131	257	27	383
82	0.0031477	109	262	28	415
83	0.0027463	69	255	27	441
84	0.0030734	65	244	22	423
85	0.0029476	2	202	27	402
86	0.0031981	19	208	28	397
87	0.0031771	7	237	27	467
88	0.0028279	21	201	27	381
89	0.0031476	10	205	24	400
90	0.003524	77	255	24	433
91	0.0030409	14	202	23	390
92	0.0033354	116	298	28	480
93	0.003501	54	225	28	396
94	0.003062	9	225	29	441
95	0.0030657	22	218	26	414
96	0.0035297	23	208	24	393
97	0.0027291	53	236	28	419
98	0.0030466	40	203	24	366
99	0.0029166	9	207	27	405
100	0.0033274	24	223	26	422
101	0.0028618	83	237	26	391
102	0.0033763	2	189	25	376
103	0.0028702	43	232	28	421
104	0.0031244	72	233	29	394
105	0.0027211	36	223	25	410
106	0.0031153	42	230	29	418
107	0.0028163	35	207	25	379
108	0.0031143	9	207	27	405
109	0.0028571	9	224	29	439
110	0.0031809	120	289	28	458
111	0.0031127	25	208	27	391
112	0.0031988	54	234	27	414
113	0.0028387	71	245	25	419
114	0.0031192	38	238	29	438
115	0.0031912	9	204	24	399
116	0.0032727	69	249	26	429
117	0.0032352	33	226	22	419
118	0.0031626	15	195	25	375
119	0.0028933	43	248	29	453
120	0.0027871	49	242	29	435
121	0.0029866	70	236	26	402
122	0.0027543	6	203	24	400
123	0.0031847	39	241	24	443
124	0.0032068	102	264	27	426
125	0.003042	63	233	23	403
126	0.0030515	31	217	26	403
127	0.0033149	40	249	25	458
128	0.0030873	40	209	27	378
129	0.0028992	13	221	29	429
130	0.0030187	16	232	28	448
131	0.0031933	2	196	27	390
132	0.0030543	4	184	24	364
133	0.0031886	25	223	27	421
134	0.0031346	51	205	27	359
135	0.0030353	15	197	20	379
136	0.0032453	72	249	26	426
137	0.0031476	85	244	26	403
138	0.0030271	19	234	25	449
139	0.0030242	20	200	27	380
140	0.0030543	21	198	23	375
141	0.0031646	5	207	24	409
142	0.0030691	33	211	24	389
143	0.0030777	11	209	28	407
144	0.0028542	19	223	24	427
145	0.0031093	16	198	25	380
146	0.0031184	13	220	27	427
147	0.0029683	93	256	26	419
148	0.0030858	15	206	25	397
149	0.0031529	6	248	26	490
150	0.0029425	21	199	25	377
151	0.0031908	2	209	26	416
152	0.0031205	82	249	20	416
153	0.0031142	8	214	28	420
154	0.002985	4	199	26	394
155	0.0033268	11	222	23	433
156	0.0031244	94	241	23	388
157	0.0029642	43	220	28	397
158	0.0032461	68	248	28	428
159	0.0034447	26	224	22	422
160	0.0030336	38	220	28	402
161	0.0028521	47	198	27	349
162	0.003051	72	249	24	426
163	0.0031101	27	227	24	427
164	0.0029293	38	222	23	406
165	0.0031582	47	243	27	439
166	0.0032941	25	195	28	365
167	0.0033011	16	231	26	446
168	0.0030518	22	205	29	388
169	0.0031221	0	208	28	416
170	0.002941	78	230	29	382
171	0.0028857	28	212	21	396
172	0.0034484	85	253	29	421
173	0.0030966	47	229	26	411
174	0.0031772	23	230	29	437
175	0.0029705	0	214	27	428
176	0.0032167	43	240	27	437
177	0.0030489	3	220	27	437
178	0.0033911	53	245	25	437
179	0.0031182	32	217	24	402
180	0.0035974	48	240	25	432
181	0.0030763	47	215	24	383
182	0.0027884	78	270	28	462
183	0.0031434	15	239	26	463
184	0.0050994	44	213	24	382
185	0.0027249	25	253	29	481
186	0.0029571	28	221	28	414
187	0.0031975	52	251	23	450
188	0.0031137	30	197	26	364
189	0.0030635	36	186	27	336
190	0.0032515	59	207	22	355
191	0.002991	9	220	25	431
192	0.0041008	44	237	28	430
193	0.0031015	40	209	27	378
194	0.0033416	16	219	28	422
195	0.0030028	4	169	24	334
196	0.0031577	14	209	29	404
197	0.0031007	9	216	24	423
198	0.0032852	28	231	26	434
199	0.0030504	45	242	28	439
200	0.0030472	25	210	26	395
201	0.0033198	47	241	27	435
202	0.0030879	53	244	27	435
203	0.0030417	40	220	29	400
204	0.0034273	56	230	28	404
205	0.0031193	91	247	29	403
206	0.0029975	115	262	29	409
207	0.0030339	100	252	28	404
208	0.0028798	25	214	28	403
209	0.0033432	7	209	22	411
210	0.0027205	37	222	27	407
211	0.0032573	34	215	26	396
212	0.0032065	8	213	24	418
213	0.0029459	72	242	29	412
214	0.0030867	90	242	28	394
215	0.002983	50	226	25	402
216	0.0033268	38	217	27	396
217	0.0029042	55	243	25	431
218	0.0033456	186	305	25	424
219	0.0030931	123	287	27	451
220	0.0029215	80	246	26	412
221	0.0031597	44	222	24	400
222	0.0031404	28	203	22	378
223	0.0029003	60	219	28	378
224	0.00315	46	239	29	432
225	0.0033146	68	224	29	380
226	0.0030164	20	200	28	380
227	0.0030844	1	213	24	425
228	0.003939	12	211	25	410
229	0.0030872	47	230	22	413
230	0.0028969	59	235	27	411
231	0.0029595	39	233	27	427
232	0.0031285	67	225	22	383
233	0.003012	72	239	28	406
234	0.00293	43	231	28	419
235	0.003162	26	237	23	448
236	0.0032892	20	233	29	446
237	0.002877	32	222	25	412
238	0.0029666	76	246	29	416
239	0.0030016	6	221	28	436
240	0.0031556	58	235	27	412
241	0.0032452	43	217	25	391
242	0.003089	21	204	24	387
243	0.0031392	108	273	26	438
244	0.0031629	20	208	29	396
245	0.003083	19	216	23	413
246	0.0029558	40	218	28	396
247	0.0031772	8	199	25	390
248	0.0032009	17	210	28	403
249	0.0030831	4	201	26	398
250	0.0029519	67	218	23	369
251	0.0030291	42	232	24	422
252	0.0030213	25	223	25	421
253	0.0032618	111	248	22	385
254	0.003016	3	184	28	365
255	0.0030215	85	221	23	357
256	0.0035213	16	222	22	428
257	0.0027898	1	215	27	429
258	0.0029633	64	231	29	398
259	0.0030198	20	224	27	428
260	0.0042855	5	197	27	389
261	0.0032743	6	209	25	412
262	0.0031032	30	229	27	428
263	0.0031225	9	203	24	397
264	0.002975	51	241	26	431
265	0.0031842	9	239	29	469
266	0.003265	84	248	26	412
267	0.0028234	13	190	25	367
268	0.0032751	43	218	24	393
269	0.0033194	14	211	23	408
270	0.003219	42	212	24	382
271	0.0029732	6	191	25	376
272	0.0028122	22	203	19	384
273	0.0030042	87	260	23	433
274	0.0028605	11	205	23	399
275	0.0035007	63	245	24	427
276	0.0031601	27	214	28	401
277	0.0030849	13	215	26	417
278	0.0033464	47	245	27	443
279	0.0031255	22	216	24	410
280	0.0034138	56	238	25	420
281	0.0027385	24	188	29	352
282	0.0028415	1	224	28	447
283	0.0034071	15	222	26	429
284	0.0031759	3	213	29	423
285	0.0032931	74	246	26	418
286	0.0030444	72	244	28	416
287	0.0033556	81	244	24	407
288	0.0028337	36	200	28	364
289	0.0029639	14	185	26	356
290	0.0031455	21	240	27	459
291	0.0033898	29	221	24	413
292	0.0029819	56	247	25	438
293	0.0031199	29	225	25	421
294	0.0030165	13	209	26	405
295	0.0029805	18	231	28	444
296	0.0032056	27	202	29	377
297	0.0030747	25	227	27	429
298	0.0035806	57	247	27	437
299	0.0032374	19	215	24	411
300	0.0037122	15	213	26	411
301	0.0030628	82	232	27	382
302	0.0029177	64	237	21	410
303	0.0029146	19	222	29	425
304	0.0031877	50	230	29	410
305	0.0033718	27	232	28	437
306	0.0032955	5	240	27	475
307	0.0031947	7	238	25	469
308	0.0034924	26	217	24	408
309	0.0033991	103	280	26	457
310	0.0028034	95	261	26	427
311	0.0031861	26	236	28	446
312	0.0034557	11	202	23	393
313	0.0034192	17	234	24	451
314	0.0031492	27	205	29	383
315	0.0030133	43	199	29	355
316	0.0037477	3	215	23	427
317	0.0027911	30	229	28	428
318	0.0032333	79	235	20	391
319	0.002933	123	266	27	409
320	0.0031333	32	235	25	438
321	0.0030123	15	210	28	405
322	0.0031052	24	233	29	442
323	0.0033928	80	245	26	410
324	0.0032121	84	274	27	464
325	0.0030959	53	219	25	385
326	0.0030732	7	198	19	389
327	0.0030651	8	204	24	400
328	0.0030626	11	201	26	391
329	0.003082	21	200	19	379
330	0.0031099	65	241	24	417
331	0.0030785	26	250	28	474
332	0.0029012	89	248	26	407
333	0.0031126	4	198	25	392
334	0.0030333	10	212	27	414
335	0.003357	19	229	24	439
336	0.002857	65	209	24	353
337	0.0034066	12	226	25	440
338	0.0033754	83	260	26	437
339	0.00314	14	190	28	366
340	0.0034774	35	233	24	431
341	0.0034876	12	223	29	434
342	0.0030501	13	194	24	375
343	0.0032745	54	233	28	412
344	0.0033612	24	244	29	464
345	0.0031605	24	252	26	480
346	0.0030891	7	202	27	397
347	0.0029782	26	209	22	392
348	0.0035249	7	222	23	437
349	0.0029885	31	210	25	389
350	0.0029764	66	243	27	420
351	0.0029813	42	236	29	430
352	0.0029775	41	216	27	391
353	0.0027559	36	200	29	364
354	0.0028372	31	237	28	443
355	0.0028641	7	225	29	443
356	0.0031969	16	214	27	412
357	0.0032616	1	189	21	377
358	0.0030335	30	238	28	446
359	0.0028862	18	204	25	390
360	0.0031107	60	221	24	382
361	0.0033191	15	208	25	401
362	0.0030516	3	182	25	361
363	0.0029278	84	256	23	428
364	0.0029918	14	208	29	402
365	0.0029299	61	218	27	375
366	0.0032686	35	204	22	373
367	0.0030976	33	219	22	405
368	0.0028655	10	210	23	410
369	0.0030399	79	269	29	459
370	0.0030813	10	207	29	404
371	0.0027901	29	219	28	409
372	0.0030463	8	227	26	446
373	0.0032077	42	214	29	386
374	0.0033367	110	274	24	438
375	0.0029722	53	225	26	397
376	0.003189	88	280	26	472
377	0.003361	5	211	20	417
378	0.0030868	23	229	24	435
379	0.0031765	15	205	27	395
380	0.0034091	65	228	24	391
381	0.0031715	24	222	24	420
382	0.0026844	49	218	26	387
383	0.0031329	41	233	27	425
384	0.0030869	102	277	25	452
385	0.0032568	29	233	26	437
386	0.003332	61	230	28	399
387	0.0031024	10	210	25	410
388	0.0035188	29	225	22	421
389	0.0031908	12	201	29	390
390	0.003032	77	218	29	359
391	0.0033669	10	215	29	420
392	0.0030509	21	203	27	385
393	0.0033841	50	228	29	406
394	0.0029688	86	223	29	360
395	0.0029124	50	206	28	362
396	0.0032272	6	212	29	418
397	0.0029586	18	220	27	422
398	0.0031832	24	214	28	404
399	0.0032359	53	244	29	435
400	0.0034144	65	237	24	409
401	0.0029935	3	183	29	363
402	0.0032125	13	209	23	405
403	0.0029809	13	203	27	393
404	0.0031773	24	226	26	428
405	0.0030922	15	223	28	431
406	0.0033234	16	224	27	432
407	0.0028676	8	203	26	398
408	0.0031345	5	218	28	431
409	0.0033662	40	221	28	402
410	0.0033079	11	231	25	451
411	0.0029658	52	230	29	408
412	0.0031741	1	206	25	411
413	0.0031958	64	258	26	452
414	0.0031206	32	238	26	444
415	0.0028086	26	212	27	398
416	0.0031558	59	220	29	381
417	0.0027979	49	237	29	425
418	0.0033271	65	257	29	449
419	0.0030361	80	236	23	392
420	0.0030134	6	201	27	396
421	0.003015	32	220	28	408
422	0.0032042	4	240	29	476
423	0.0027272	10	190	24	370
424	0.002986	14	206	24	398
425	0.0032314	120	276	27	432
426	0.0030607	32	226	24	420
427	0.0029369	31	200	26	369
428	0.0033626	27	216	24	405
429	0.0029685	42	236	29	430
430	0.0029866	36	219	24	402
431	0.0031628	12	230	29	448
432	0.0031081	2	226	24	450
433	0.0031723	25	234	23	443
434	0.0032003	65	239	27	413
435	0.003	18	224	27	430
436	0.0031578	66	248	27	430
437	0.0030522	8	221	24	434
438	0.0028954	14	211	29	408
439	0.0033599	41	216	24	391
440	0.0030475	16	220	25	424
441	0.0029528	3	198	28	393
442	0.0029842	22	225	26	428
443	0.0029397	23	235	23	447
444	0.003067	19	200	24	381
445	0.003029	93	238	23	383
446	0.0032787	15	223	26	431
447	0.0032708	31	227	27	423
448	0.0027712	9	213	29	417
449	0.0033821	90	257	28	424
450	0.002847	113	277	23	441
451	0.0032109	1	218	27	435
452	0.0030526	72	221	26	370
453	0.0029987	36	210	26	384
454	0.0033758	24	203	25	382
455	0.0028282	38	209	29	380
456	0.0029512	50	233	27	416
457	0.003343	22	217	26	412
458	0.0029011	25	212	27	399
459	0.0027864	4	202	29	400
460	0.003596	18	215	22	412
461	0.0030669	34	217	26	400
462	0.0029857	2	190	27	378
463	0.0029576	106	272	28	438
464	0.0029675	32	229	29	426
465	0.0027411	87	263	27	439
466	0.0030461	2	199	22	396
467	0.0032461	39	214	24	389
468	0.0032022	29	223	25	417
469	0.0030531	39	209	27	379
470	0.002934	27	214	27	401
471	0.0031914	65	229	27	393
472	0.0030686	32	241	25	450
473	0.0030654	58	233	24	408
474	0.002924	105	251	25	397
475	0.0031898	10	241	24	472
476	0.0030724	47	239	29	431
477	0.0028983	28	189	27	350
478	0.0032286	11	199	25	387
479	0.0031154	48	233	25	418
480	0.003031	1	214	25	427
481	0.0033228	40	225	22	410
482	0.0034205	11	221	29	431
483	0.0031034	40	220	28	400
484	0.003336	5	176	28	347
485	0.0030336	21	203	26	385
486	0.0030471	15	192	26	369
487	0.0027415	57	225	20	393
488	0.0029535	55	248	27	441
489	0.0033864	12	214	26	416
490	0.0028486	118	268	24	418
491	0.0032745	22	239	27	456
492	0.0032585	10	208	29	406
493	0.0031194	30	250	26	470
494	0.0030871	62	247	25	432
495	0.0032237	1	210	26	419
496	0.0032506	48	243	25	438
497	0.0030142	1	180	26	359
498	0.0032161	22	232	27	442
499	0.0028659	21	219	27	417
500	0.0029401	70	230	26	390
501	0.0031433	22	247	25	472
502	0.003001	78	250	29	422
503	0.0033128	32	229	26	426
504	0.0029859	1	210	29	419
505	0.0030643	2	198	24	394
506	0.0027468	52	222	29	392
507	0.0029872	67	228	24	389
508	0.0028914	56	235	26	414
509	0.0032409	62	241	26	420
510	0.0032819	61	245	24	429
511	0.0031982	61	243	24	425
512	0.0029135	12	234	27	456
513	0.0027828	44	223	27	402
514	0.0030895	52	230	28	408
515	0.0030354	8	220	28	432
516	0.0032847	84	284	27	484
517	0.0030856	2	223	25	444
518	0.0033313	6	227	27	448
519	0.0032874	59	248	26	437
520	0.0028484	72	244	29	416
521	0.0028042	25	242	28	459
522	0.0030011	8	203	28	398
523	0.0032698	57	242	28	427
524	0.0030006	44	216	26	388
525	0.0031006	34	224	25	414
526	0.002948	4	187	28	370
527	0.0029503	7	206	29	405
528	0.0028258	75	261	29	447
529	0.0029651	41	209	26	377
530	0.0028886	108	235	26	362
531	0.0031688	36	225	23	414
532	0.0030935	87	239	28	391
533	0.0031258	40	220	26	400
534	0.0028128	68	219	29	370
535	0.0031399	39	214	24	389
536	0.0030775	22	202	29	382
537	0.0029803	45	247	27	449
538	0.002761	10	175	24	340
539	0.0033937	68	247	29	426
540	0.0031393	2	206	25	410
541	0.0029336	78	256	27	434
542	0.0032183	30	211	25	392
543	0.0030243	43	232	26	421
544	0.0032588	78	260	27	442
545	0.0030163	1	205	27	409
546	0.0029936	90	276	25	462
547	0.002878	90	254	27	418
548	0.0030798	1	219	27	437
549	0.0030728	30	228	27	426
550	0.0029646	12	187	26	362
551	0.0031103	60	222	24	384
552	0.0030478	29	206	28	383
553	0.0030636	19	207	23	395
554	0.0027283	12	204	29	396
555	0.0029693	26	247	25	468
556	0.0027383	118	276	28	434
557	0.0030153	4	201	27	398
558	0.0032071	25	236	26	447
559	0.0029016	85	232	26	379
560	0.0029613	27	220	24	413
561	0.0033036	109	274	29	439
562	0.0031624	20	227	25	434
563	0.003441	8	209	28	410
564	0.0030442	9	184	25	359
565	0.0032495	47	246	23	445
566	0.0031478	20	212	27	404
567	0.0031414	9	192	22	375
568	0.0032503	0	201	28	402
569	0.0032247	32	231	28	430
570	0.0029076	27	211	27	395
571	0.002962	12	202	26	392
572	0.0028154	59	240	29	421
573	0.0031207	19	200	26	381
574	0.0030274	21	204	25	387
575	0.0031554	87	265	28	443
576	0.0034897	47	228	24	409
577	0.0029815	1	162	25	323
578	0.0030674	26	236	29	446
579	0.0032591	12	195	28	378
580	0.0032756	59	237	27	415
581	0.0033022	17	216	27	415
582	0.0031011	29	222	22	415
583	0.003244	23	208	26	393
584	0.0027993	37	251	24	465
585	0.0032562	9	202	28	395
586	0.0030509	18	204	22	390
587	0.0031939	84	261	26	438
588	0.0028004	170	280	28	390
589	0.0031076	91	254	26	417
590	0.0030336	19	202	29	385
591	0.0032273	19	198	29	377
592	0.002803	69	243	29	417
593	0.0033422	36	203	22	370
594	0.0031621	45	221	28	397
595	0.0035694	41	256	26	471
596	0.0029122	24	225	28	426
597	0.0031489	2	209	25	416
598	0.0029006	14	194	23	374
599	0.0036195	18	206	27	394
600	0.0033305	99	274	25	449
601	0.003059	86	265	28	444
602	0.0029765	3	184	29	365
603	0.0034037	2	201	23	400
604	0.0034058	111	258	26	405
605	0.003158	10	221	25	432
606	0.0029919	103	263	26	423
607	0.0031815	65	247	26	429
608	0.0032137	24	227	23	430
609	0.0029754	36	223	28	410
610	0.0030935	92	245	24	398
611	0.003022	16	220	27	424
612	0.0030164	44	216	27	388
613	0.0027945	43	221	23	399
614	0.0029723	3	214	27	425
615	0.0031685	51	249	27	447
616	0.0028292	69	224	29	379
617	0.0030291	8	223	27	438
618	0.0030985	11	204	27	397
619	0.0030155	38	199	24	360
620	0.0030848	75	219	24	363
621	0.0032452	31	201	24	371
622	0.0032338	58	233	26	408
623	0.0031553	18	216	24	414
624	0.0031584	8	215	28	422
625	0.0032214	17	231	22	445
626	0.0030643	19	218	28	417
627	0.0029889	63	208	26	353
628	0.0030235	52	222	26	392
629	0.0035903	18	221	25	424
630	0.0032107	7	206	26	405
631	0.0030655	45	238	23	431
632	0.0032224	39	214	24	389
633	0.0032013	64	255	28	446
634	0.0030061	69	244	24	419
635	0.0030245	77	244	27	411
636	0.0028631	85	264	27	443
637	0.003183	67	238	26	409
638	0.0029467	17	219	26	421
639	0.0030474	28	212	25	396
640	0.0032472	5	223	25	441
641	0.0030525	2	212	26	422
642	0.0028735	40	213	28	386
643	0.0032519	1	205	28	409
644	0.0030689	15	242	28	469
645	0.003143	2	204	23	406
646	0.0031547	24	222	23	420
647	0.0031668	4	205	27	406
648	0.0027261	95	262	29	429
649	0.0031737	5	229	25	453
650	0.0032949	127	279	27	431
651	0.0030024	37	226	24	415
652	0.0031041	40	230	28	420
653	0.0033044	22	230	29	438
654	0.0031662	52	227	26	402
655	0.003203	45	242	29	439
656	0.0027688	25	224	27	423
657	0.0030065	1	209	26	417
658	0.0031461	74	230	25	386
659	0.0028235	52	216	23	380
660	0.0032196	48	220	28	392
661	0.0032063	5	206	22	407
662	0.0031351	11	200	27	389
663	0.0028249	7	206	27	405
664	0.0032544	23	209	27	395
665	0.0031353	69	232	28	395
666	0.0029349	18	204	29	390
667	0.0034301	51	253	24	455
668	0.0031906	12	174	29	336
669	0.003098	43	223	23	403
670	0.003403	1	221	28	441
671	0.0031294	54	235	24	416
672	0.0028704	120	289	26	458
673	0.0032897	135	292	25	449
674	0.0031081	25	225	28	425
675	0.0032577	10	221	25	432
676	0.0029721	25	232	25	439
677	0.0033217	28	218	28	408
678	0.0032244	28	211	27	394
679	0.0032938	12	207	22	402
680	0.0029377	37	217	26	397
681	0.0031286	20	204	28	388
682	0.0034163	33	231	28	429
683	0.0030671	23	196	23	369
684	0.0028167	43	213	29	383
685	0.0029468	21	201	28	381
686	0.0031914	20	213	28	406
687	0.0029337	10	214	26	418
688	0.0036841	5	198	26	391
689	0.0032031	72	245	26	418
690	0.0029647	55	241	29	427
691	0.003185	10	191	25	372
692	0.0030801	94	272	28	450
693	0.003123	16	192	27	368
694	0.0029347	50	234	29	418
695	0.0031616	77	248	27	419
696	0.0030081	37	242	28	447
697	0.0030269	86	253	28	420
698	0.0028225	10	217	28	424
699	0.0030933	23	213	29	403
700	0.0031105	6	230	27	454
701	0.003319	7	212	26	417
702	0.0031716	13	210	25	407
703	0.0033067	34	208	29	382
704	0.0031653	41	221	26	401
705	0.0027301	58	207	27	356
706	0.0031923	19	219	25	419
707	0.0031617	10	225	28	440
708	0.0027769	59	238	24	417
709	0.0033844	12	212	27	412
710	0.003273	40	238	26	436
711	0.0032878	46	200	24	354
712	0.0032081	2	216	25	430
713	0.0031125	13	215	27	417
714	0.0032677	7	218	26	429
715	0.0033028	26	200	29	374
716	0.0035421	39	219	29	399
717	0.003076	16	185	22	354
718	0.0033152	13	213	29	413
719	0.0032645	12	188	27	364
720	0.0033466	8	215	25	422
721	0.0027343	9	208	27	407
722	0.0032783	59	234	23	409
723	0.0033594	4	215	26	426
724	0.0056239	33	213	26	393
725	0.0027153	106	251	28	396
726	0.0028615	57	245	29	433
727	0.0028922	32	220	26	408
728	0.0030824	2	188	28	374
729	0.0031375	14	222	26	430
730	0.0031669	62	239	29	416
731	0.0031756	5	206	24	407
732	0.0032035	65	230	26	395
733	0.0031178	81	237	28	393
734	0.0031374	5	208	27	411
735	0.0030189	46	251	27	456
736	0.0034609	4	223	28	442
737	0.0031369	51	214	25	377
738	0.0031416	2	217	29	432
739	0.0030375	13	225	27	437
740	0.0030299	4	200	23	396
741	0.003121	10	203	28	396
742	0.003038	76	249	23	422
743	0.0029603	1	189	24	377
744	0.0030798	108	267	23	426
745	0.0028565	72	251	28	430
746	0.0032265	11	218	26	425
747	0.0031244	12	220	27	428
748	0.0029723	27	205	23	383
749	0.0031902	27	188	24	349
750	0.0032379	10	207	24	404
751	0.0030734	12	209	24	406
752	0.0031429	14	220	24	426
753	0.0030748	7	198	27	389
754	0.0034176	0	207	24	414
755	0.0031255	74	252	24	430
756	0.0031233	1	184	23	367
757	0.0031373	24	198	27	372
758	0.0032605	10	214	24	418
759	0.0029867	2	197	28	392
760	0.0027883	51	250	27	449
761	0.0031269	28	238	28	448
762	0.0028098	7	206	28	405
763	0.0030318	21	230	27	439
764	0.0031092	39	227	25	415
765	0.0030672	0	213	26	426
766	0.0030189	30	215	29	400
767	0.0030439	21	213	24	405
768	0.0030178	9	210	22	411
769	0.003137	5	209	25	413
770	0.0029855	38	205	24	372
771	0.0030555	57	228	23	399
772	0.0031911	15	197	23	379
773	0.0032154	35	226	24	417
774	0.0030819	62	245	24	428
775	0.0031679	68	251	29	434
776	0.0033234	48	250	28	452
777	0.0030224	29	209	22	389
778	0.0033179	0	206	28	412
779	0.0030847	83	252	22	421
780	0.0029938	73	237	26	401
781	0.0030252	63	230	24	397
782	0.0030225	70	247	28	424
783	0.0029077	5	228	25	451
784	0.0030509	58	227	29	396
785	0.0031812	9	214	29	419
786	0.0029999	148	274	25	400
787	0.0033747	37	208	28	379
788	0.0031925	78	249	24	420
789	0.0033656	28	220	23	412
790	0.0032874	37	229	25	421
791	0.0034473	75	231	21	387
792	0.00306	4	210	25	416
793	0.0032732	65	242	22	419
794	0.0031436	59	247	29	435
795	0.0032568	7	195	25	383
796	0.0033059	21	211	23	401
797	0.0030723	1	227	29	453
798	0.0030869	5	206	21	407
799	0.0031995	81	246	25	411
800	0.0033827	22	205	25	388
801	0.0031543	55	218	26	381
802	0.0029827	13	212	27	411
803	0.0030926	30	221	25	412
804	0.0030077	46	210	25	374
805	0.0033639	8	214	27	420
806	0.0028449	35	215	27	395
807	0.0030023	13	224	26	435
808	0.0033215	70	259	27	448
809	0.0033206	38	215	23	392
810	0.0030344	65	251	29	437
811	0.003325	64	240	24	416
812	0.0035553	40	224	29	408
813	0.0030916	125	282	26	439
814	0.0028782	18	211	25	404
815	0.0034535	41	186	20	331
816	0.0030132	16	219	27	422
817	0.0028667	5	211	29	417
818	0.0034036	57	240	23	423
819	0.0031258	15	199	26	383
820	0.0032176	27	225	29	423
821	0.0031172	130	291	29	452
822	0.0033406	72	247	29	422
823	0.0033341	17	209	26	401
824	0.0033258	27	201	29	375
825	0.0033124	29	221	26	413
826	0.0030487	97	249	26	401
827	0.0032117	2	176	22	350
828	0.002831	13	190	28	367
829	0.0029082	24	228	25	432
830	0.0030489	32	213	29	394
831	0.003009	2	211	25	420
832	0.0034937	12	236	24	460
833	0.0031377	44	214	29	384
834	0.00326	73	257	28	441
835	0.0032074	46	199	26	352
836	0.0031878	4	232	26	460
837	0.0031468	13	214	24	415
838	0.0029675	24	206	24	388
839	0.0028815	48	233	28	418
840	0.0027791	97	256	29	415
841	0.0030961	23	206	22	389
842	0.003372	77	269	26	461
843	0.0031935	41	250	25	459
844	0.0034065	20	207	24	394
845	0.0031764	17	220	25	423
846	0.0031776	28	227	26	426
847	0.0033674	19	215	29	411
848	0.0028956	49	223	20	397
849	0.0033431	10	221	23	432
850	0.0032386	5	194	26	383
851	0.0030473	13	201	28	389
852	0.0030495	7	217	29	427
853	0.0030731	7	226	27	445
854	0.0029912	6	199	26	392
855	0.0031559	52	213	26	374
856	0.0031216	91	283	28	475
857	0.0033522	54	241	26	428
858	0.0030547	52	224	25	396
859	0.0028976	91	262	28	433
860	0.0031598	9	200	29	391
861	0.0031278	39	222	23	405
862	0.0028859	27	229	27	431
863	0.0027965	41	229	29	417
864	0.0031521	1	212	24	423
865	0.003258	7	199	26	391
866	0.0030989	33	235	28	437
867	0.0031242	16	205	25	394
868	0.0030541	52	237	26	422
869	0.0032055	55	227	27	399
870	0.0029543	85	259	25	433
871	0.0030124	44	225	23	406
872	0.0030491	11	223	28	435
873	0.003612	45	219	26	393
874	0.0030795	38	223	25	408
875	0.0030905	10	199	23	388
876	0.0030703	3	202	27	401
877	0.0030574	76	218	27	360
878	0.0031017	28	210	23	392
879	0.0028996	83	268	29	453
880	0.0031531	14	215	23	416
881	0.0030912	14	208	29	402
882	0.0029424	81	237	25	393
883	0.0033225	56	229	27	402
884	0.0029524	52	226	27	400
885	0.0032002	29	220	22	411
886	0.0028444	66	238	23	410
887	0.0031818	19	226	21	433
888	0.0032779	24	230	23	436
889	0.0037569	37	222	25	407
890	0.0031263	115	241	23	367
891	0.0032214	56	210	22	364
892	0.0030576	11	190	27	369
893	0.0030236	12	224	23	436
894	0.0031219	21	225	23	429
895	0.0032023	45	255	26	465
896	0.0028306	20	217	22	414
897	0.0027667	7	225	25	443
898	0.0029738	31	212	26	393
899	0.0035213	6	186	26	366
900	0.0029733	31	218	22	405
901	0.0032566	48	226	25	404
902	0.0029183	38	213	28	388
903	0.0027696	57	242	27	427
904	0.0032712	39	220	28	401
905	0.0033901	16	213	28	410
906	0.0030298	22	223	25	424
907	0.0031671	34	221	25	408
908	0.0030456	48	220	23	392
909	0.0029688	39	233	26	427
910	0.003148	62	227	21	392
911	0.0029028	25	228	28	431
912	0.0034632	100	280	25	460
913	0.0032645	9	218	26	427
914	0.0031998	6	214	25	422
915	0.0030282	38	234	28	430
916	0.0029447	63	243	27	423
917	0.0031846	17	204	27	391
918	0.002881	43	223	28	403
919	0.00324	1	200	21	399
920	0.0033701	35	199	24	363
921	0.0030907	1	199	27	397
922	0.0032418	47	232	25	417
923	0.0032358	20	221	23	422
924	0.0029849	49	218	26	387
925	0.0034081	12	201	26	390
926	0.0028899	92	267	29	442
927	0.0033487	26	214	26	402
928	0.0033601	41	233	27	425
929	0.0036991	100	244	24	388
930	0.003258	143	278	26	413
931	0.0033784	28	209	24	390
932	0.0032127	95	263	26	431
933	0.0031616	11	216	26	421
934	0.0028509	5	196	24	387
935	0.0027744	27	210	26	393
936	0.0031246	25	207	23	389
937	0.0029279	74	256	28	438
938	0.0035063	19	216	24	413
939	0.0031894	16	227	26	438
940	0.0031062	19	219	29	419
941	0.003038	6	197	26	388
942	0.0030308	31	218	29	405
943	0.0029095	29	227	23	425
944	0.0027961	52	219	25	386
945	0.0031313	45	256	25	467
946	0.0029668	65	251	25	437
947	0.0030674	11	228	27	445
948	0.0034375	3	203	23	403
949	0.0030913	36	229	22	422
950	0.0033372	18	198	27	378
951	0.0029747	9	232	25	455
952	0.0031961	51	227	28	403
953	0.0033117	120	260	26	400
954	0.002767	51	238	27	425
955	0.0031501	35	214	28	393
956	0.0031667	29	245	23	461
957	0.0031549	63	237	27	411
958	0.002959	21	224	25	427
959	0.003001	30	238	25	446
960	0.0031799	38	238	25	438
961	0.0032805	0	212	28	424
962	0.0031475	78	262	26	446
963	0.0031925	34	210	28	386
964	0.0029517	39	216	29	393
965	0.00333	10	230	28	450
966	0.0028305	145	299	21	453
967	0.0028432	75	264	29	453
968	0.0032493	2	197	21	392
969	0.0026863	11	201	26	391
970	0.0027685	162	316	28	470
971	0.0031358	36	210	26	384
972	0.0032893	24	222	23	420
973	0.0030445	26	223	24	420
974	0.0029844	19	197	23	375
975	0.0029841	102	264	28	426
976	0.0028429	18	195	28	372
977	0.0031592	17	200	29	383
978	0.0029728	32	232	27	432
979	0.0033104	44	227	20	410
980	0.0033422	47	231	23	415
981	0.0034144	35	206	24	377
982	0.0032621	20	204	23	388
983	0.0034527	2	213	24	424
984	0.0028841	28	231	24	434
985	0.0029113	55	233	25	411
986	0.0029864	104	239	29	374
987	0.0031583	50	265	27	480
988	0.0032386	144	288	27	432
989	0.0032757	34	211	29	388
990	0.0031086	38	234	28	430
991	0.0031131	21	197	28	373
992	0.0033385	31	229	28	427
993	0.0032697	10	201	21	392
994	0.003062	19	233	24	447
995	0.0029639	70	244	25	418
996	0.0029866	47	232	25	417
997	0.0029618	126	274	26	422
998	0.0035203	30	230	28	430
999	0.0028496	12	205	28	398
mean	0.00311914	37.374	224.326	25.957	411.278

## Sheet: PolyMin_Bal
	time	SEq	Bal	Reg	Egal
0	0.0034861	42	202	20	362
1	0.0032062	8	211	28	414
2	0.0032762	55	254	26	453
3	0.0029751	6	215	27	424
4	0.0027151	14	202	28	390
5	0.0028201	34	215	23	396
6	0.0031296	4	198	27	392
7	0.0031532	5	192	24	379
8	0.0031085	42	199	20	356
9	0.003149	32	202	23	372
10	0.0031289	14	213	24	412
11	0.0030433	20	237	22	454
12	0.0027473	36	218	28	400
13	0.0029659	79	258	24	437
14	0.0030854	22	207	29	392
15	0.0031587	20	205	27	390
16	0.0029197	3	207	26	411
17	0.0028265	35	241	29	447
18	0.0031047	1	213	25	425
19	0.0030067	5	220	23	435
20	0.0032145	36	224	22	412
21	0.0029812	3	206	28	409
22	0.0029885	4	210	28	416
23	0.0031735	18	197	24	376
24	0.0031115	9	203	24	397
25	0.0030776	60	256	27	452
26	0.0032457	44	234	27	424
27	0.0029632	49	217	29	385
28	0.0032292	15	205	25	395
29	0.0028953	46	224	26	402
30	0.0029289	119	285	24	451
31	0.0031396	20	237	25	454
32	0.0030593	66	243	28	420
33	0.003042	30	231	25	432
34	0.0031783	85	243	28	401
35	0.0030765	21	197	25	373
36	0.0030575	51	203	23	355
37	0.0030886	31	243	28	455
38	0.0030168	91	240	24	389
39	0.0033137	20	207	24	394
40	0.0029711	17	215	24	413
41	0.0030209	24	218	29	412
42	0.0027322	31	218	27	405
43	0.0030707	28	221	29	414
44	0.0033217	38	231	24	424
45	0.002943	85	243	27	401
46	0.0032309	14	222	23	430
47	0.0029168	7	216	29	425
48	0.0037226	8	189	27	370
49	0.0031155	52	227	28	402
50	0.0028025	31	226	23	421
51	0.00313	67	243	29	419
52	0.0033872	33	228	29	423
53	0.0026958	13	220	24	427
54	0.0031773	25	215	27	405
55	0.002933	51	227	27	403
56	0.0030296	23	234	26	445
57	0.0032951	2	198	21	394
58	0.0029684	25	207	29	389
59	0.0031645	82	242	24	402
60	0.0033594	84	236	26	388
61	0.0032281	60	250	25	440
62	0.0028341	18	238	28	458
63	0.0031907	11	217	23	423
64	0.0030891	10	194	25	378
65	0.0030729	50	256	29	462
66	0.0029917	26	237	24	448
67	0.0027644	88	237	22	386
68	0.003152	104	251	26	398
69	0.0032388	24	194	23	364
70	0.0030491	66	227	23	388
71	0.003073	30	206	26	382
72	0.003288	27	234	27	441
73	0.0030683	10	214	29	418
74	0.0028833	24	217	23	410
75	0.0035594	64	245	25	426
76	0.0031982	84	271	24	458
77	0.0032029	46	205	25	364
78	0.0030401	28	202	27	376
79	0.002994	20	207	27	394
80	0.0030406	5	237	25	469
81	0.0030751	131	257	27	383
82	0.0030888	109	262	28	415
83	0.0029393	69	255	27	441
84	0.0033637	68	239	28	410
85	0.0031239	2	202	27	402
86	0.003185	19	208	28	397
87	0.0030496	7	237	27	467
88	0.0028073	21	201	27	381
89	0.0031036	10	205	24	400
90	0.0031248	77	255	24	433
91	0.0033649	14	202	23	390
92	0.0031901	116	298	28	480
93	0.0033136	54	225	28	396
94	0.003265	12	219	29	426
95	0.0031273	22	218	26	414
96	0.003096	23	208	24	393
97	0.0027997	53	236	28	419
98	0.0031855	40	203	24	366
99	0.0030905	9	207	27	405
100	0.0035159	35	216	27	397
101	0.0026995	83	237	26	391
102	0.0030045	2	189	25	376
103	0.0028342	43	232	28	421
104	0.0031083	72	233	29	394
105	0.0028252	36	223	25	410
106	0.0029722	42	230	29	418
107	0.0028002	35	207	25	379
108	0.0032723	9	207	27	405
109	0.0027908	9	224	29	439
110	0.0030702	120	289	28	458
111	0.0027525	25	208	27	391
112	0.0029773	54	234	27	414
113	0.0028702	71	245	25	419
114	0.0030256	38	238	29	438
115	0.0032286	9	204	24	399
116	0.0036436	69	249	26	429
117	0.0033531	33	226	22	419
118	0.0031148	15	195	25	375
119	0.0029912	43	248	29	453
120	0.0028758	49	242	29	435
121	0.0031776	70	236	26	402
122	0.0027579	6	203	24	400
123	0.0031238	39	241	24	443
124	0.0033321	102	264	27	426
125	0.0030872	63	233	23	403
126	0.0030599	31	217	26	403
127	0.003263	40	249	25	458
128	0.0029656	40	209	27	378
129	0.003015	13	221	29	429
130	0.0031033	16	232	28	448
131	0.003104	2	196	27	390
132	0.0030557	4	184	24	364
133	0.0028882	25	223	27	421
134	0.0031296	51	205	27	359
135	0.0027778	15	197	20	379
136	0.0030564	72	249	26	426
137	0.0033099	85	244	26	403
138	0.0031941	19	234	25	449
139	0.0029896	20	200	27	380
140	0.0030501	21	198	23	375
141	0.0031807	5	207	24	409
142	0.0031576	33	211	24	389
143	0.0030781	11	209	28	407
144	0.0028361	19	223	24	427
145	0.0032457	16	198	25	380
146	0.0032954	13	220	27	427
147	0.0029188	93	256	26	419
148	0.0031384	15	206	25	397
149	0.0030553	6	248	26	490
150	0.0028055	21	199	25	377
151	0.0031201	2	209	26	416
152	0.0032287	82	249	20	416
153	0.0031285	8	214	28	420
154	0.0032343	4	199	26	394
155	0.0031833	11	222	23	433
156	0.0030908	94	241	23	388
157	0.002969	43	220	28	397
158	0.0030163	68	248	28	428
159	0.0031388	26	224	22	422
160	0.003067	38	220	28	402
161	0.002895	47	198	27	349
162	0.0030828	72	249	24	426
163	0.0029636	27	227	24	427
164	0.0035801	38	222	23	406
165	0.0030025	47	243	27	439
166	0.0031515	25	195	28	365
167	0.0032703	16	231	26	446
168	0.0028425	22	205	29	388
169	0.0029455	0	208	28	416
170	0.0029509	78	230	29	382
171	0.0030071	28	212	21	396
172	0.0032273	85	253	29	421
173	0.0031915	50	224	28	398
174	0.0030348	23	230	29	437
175	0.0030785	0	214	27	428
176	0.0037203	43	240	27	437
177	0.002909	3	220	27	437
178	0.0033722	59	236	29	413
179	0.0032938	32	217	24	402
180	0.0034043	49	238	27	427
181	0.0031956	47	215	24	383
182	0.0028122	78	270	28	462
183	0.0032569	15	239	26	463
184	0.0030926	47	212	29	377
185	0.0029546	25	253	29	481
186	0.0030448	28	221	28	414
187	0.0031355	52	251	23	450
188	0.0030715	30	197	26	364
189	0.0030188	36	186	27	336
190	0.0034881	59	207	22	355
191	0.0031433	9	220	25	431
192	0.003003	44	237	28	430
193	0.003036	40	209	27	378
194	0.0031675	16	219	28	422
195	0.003088	4	169	24	334
196	0.0031217	14	209	29	404
197	0.003187	9	216	24	423
198	0.0031719	28	231	26	434
199	0.0030938	45	242	28	439
200	0.0030652	25	210	26	395
201	0.0032351	47	241	27	435
202	0.0031215	53	244	27	435
203	0.0030832	40	220	29	400
204	0.0030461	56	230	28	404
205	0.0032539	91	247	29	403
206	0.0032693	115	262	29	409
207	0.002987	100	252	28	404
208	0.0027054	25	214	28	403
209	0.0032318	7	209	22	411
210	0.002749	37	222	27	407
211	0.0033569	34	215	26	396
212	0.002937	8	213	24	418
213	0.002983	72	242	29	412
214	0.0029313	90	242	28	394
215	0.0030853	50	226	25	402
216	0.0032082	38	217	27	396
217	0.0030872	55	243	25	431
218	0.0033848	186	305	25	424
219	0.0030227	123	287	27	451
220	0.0029927	80	246	26	412
221	0.0032931	49	218	28	387
222	0.0032106	28	203	22	378
223	0.0030045	60	219	28	378
224	0.003074	46	239	29	432
225	0.0029191	68	224	29	380
226	0.0030811	20	200	28	380
227	0.0032196	1	213	24	425
228	0.0032583	27	207	27	387
229	0.0032732	47	230	22	413
230	0.0029408	59	235	27	411
231	0.0030758	39	233	27	427
232	0.0031976	67	225	22	383
233	0.0031729	72	239	28	406
234	0.0028642	43	231	28	419
235	0.0031837	26	237	23	448
236	0.0032282	20	233	29	446
237	0.0027251	32	222	25	412
238	0.0027539	76	246	29	416
239	0.0029276	6	221	28	436
240	0.00326	58	235	27	412
241	0.0034248	43	217	25	391
242	0.0031305	21	204	24	387
243	0.0031397	108	273	26	438
244	0.0032084	20	208	29	396
245	0.002974	19	216	23	413
246	0.0032488	40	218	28	396
247	0.0033712	8	199	25	390
248	0.003173	17	210	28	403
249	0.0031167	4	201	26	398
250	0.0030787	67	218	23	369
251	0.0030548	42	232	24	422
252	0.0033133	25	223	25	421
253	0.0032081	111	248	22	385
254	0.0030722	3	184	28	365
255	0.0026504	85	221	23	357
256	0.0034197	16	222	22	428
257	0.00304	1	215	27	429
258	0.0027344	64	231	29	398
259	0.0031794	20	224	27	428
260	0.0029159	5	197	27	389
261	0.0032924	6	209	25	412
262	0.0032125	30	229	27	428
263	0.0031022	9	203	24	397
264	0.0028875	51	241	26	431
265	0.0029984	9	239	29	469
266	0.0032561	90	246	27	402
267	0.0026832	13	190	25	367
268	0.0029535	43	218	24	393
269	0.0032536	14	211	23	408
270	0.0031439	42	212	24	382
271	0.0030967	6	191	25	376
272	0.0028548	22	203	19	384
273	0.0030805	87	260	23	433
274	0.0029144	11	205	23	399
275	0.0032314	63	245	24	427
276	0.0031986	27	214	28	401
277	0.0030008	13	215	26	417
278	0.0031453	71	240	28	409
279	0.0031614	22	216	24	410
280	0.0029833	56	238	25	420
281	0.0030055	24	188	29	352
282	0.0028275	1	224	28	447
283	0.0031693	36	219	27	402
284	0.0031006	3	213	29	423
285	0.0032314	74	246	26	418
286	0.0030368	72	244	28	416
287	0.0032843	81	244	24	407
288	0.0028847	36	200	28	364
289	0.0028071	14	185	26	356
290	0.0030123	21	240	27	459
291	0.0032296	29	221	24	413
292	0.0031957	56	247	25	438
293	0.0029989	29	225	25	421
294	0.0031402	13	209	26	405
295	0.0030667	18	231	28	444
296	0.0031753	27	202	29	377
297	0.0031743	25	227	27	429
298	0.0035154	57	247	27	437
299	0.0033009	19	215	24	411
300	0.0032019	15	213	26	411
301	0.0030163	82	232	27	382
302	0.0028747	64	237	21	410
303	0.0027514	19	222	29	425
304	0.0032102	50	230	29	410
305	0.0030111	27	224	29	421
306	0.0033882	5	240	27	475
307	0.0029807	7	238	25	469
308	0.003315	26	217	24	408
309	0.0035729	103	280	26	457
310	0.0028045	95	261	26	427
311	0.0030686	26	236	28	446
312	0.0032192	11	202	23	393
313	0.0030852	17	234	24	451
314	0.0030919	27	205	29	383
315	0.0030298	43	199	29	355
316	0.0032834	3	215	23	427
317	0.0028536	30	229	28	428
318	0.0031857	79	235	20	391
319	0.0027866	123	266	27	409
320	0.0032485	32	235	25	438
321	0.0029393	15	210	28	405
322	0.0032543	24	233	29	442
323	0.0031484	80	245	26	410
324	0.0032361	84	274	27	464
325	0.0030767	62	216	27	370
326	0.0033193	7	198	19	389
327	0.0030006	8	204	24	400
328	0.0030918	11	201	26	391
329	0.003099	21	200	19	379
330	0.0029297	65	241	24	417
331	0.0030214	26	250	28	474
332	0.002705	89	248	26	407
333	0.0032015	4	198	25	392
334	0.0030117	10	212	27	414
335	0.0031407	19	229	24	439
336	0.0030457	65	209	24	353
337	0.0033379	12	226	25	440
338	0.0037642	83	260	26	437
339	0.0030492	14	190	28	366
340	0.0032568	35	233	24	431
341	0.0031587	12	223	29	434
342	0.0030234	13	194	24	375
343	0.0032304	54	233	28	412
344	0.0031929	24	244	29	464
345	0.0031338	24	252	26	480
346	0.0030907	7	202	27	397
347	0.0029462	26	209	22	392
348	0.0033191	7	222	23	437
349	0.0031564	31	210	25	389
350	0.0031049	66	243	27	420
351	0.0028232	42	236	29	430
352	0.0030387	41	216	27	391
353	0.0027127	36	200	29	364
354	0.0028123	31	237	28	443
355	0.0028359	7	225	29	443
356	0.0032129	16	214	27	412
357	0.0033305	1	189	21	377
358	0.0030139	30	238	28	446
359	0.0028615	18	204	25	390
360	0.0030518	60	221	24	382
361	0.003199	15	208	25	401
362	0.0030484	3	182	25	361
363	0.0029947	84	256	23	428
364	0.003166	14	208	29	402
365	0.0030031	61	218	27	375
366	0.0032981	35	204	22	373
367	0.0033779	33	219	22	405
368	0.0028271	10	210	23	410
369	0.0031215	79	269	29	459
370	0.003059	10	207	29	404
371	0.0028074	29	219	28	409
372	0.0032015	8	227	26	446
373	0.0031065	42	214	29	386
374	0.0034169	110	274	24	438
375	0.0032627	53	225	26	397
376	0.0033224	88	280	26	472
377	0.0032517	5	211	20	417
378	0.0030209	23	229	24	435
379	0.0032217	15	205	27	395
380	0.0031377	65	228	24	391
381	0.0031968	24	222	24	420
382	0.0029208	49	218	26	387
383	0.0032384	41	233	27	425
384	0.0029647	102	277	25	452
385	0.0031291	29	233	26	437
386	0.0032946	61	230	28	399
387	0.0030837	10	210	25	410
388	0.0047324	29	225	22	421
389	0.0031362	12	201	29	390
390	0.0032268	77	218	29	359
391	0.0030496	10	215	29	420
392	0.0032282	21	203	27	385
393	0.0033068	50	228	29	406
394	0.0028949	86	223	29	360
395	0.0027855	50	206	28	362
396	0.002957	6	212	29	418
397	0.0030824	40	216	27	392
398	0.0031944	24	214	28	404
399	0.0030748	53	244	29	435
400	0.0036994	65	237	24	409
401	0.0030044	3	183	29	363
402	0.0032504	13	209	23	405
403	0.0030425	13	203	27	393
404	0.003153	24	226	26	428
405	0.0032296	15	223	28	431
406	0.0032603	16	224	27	432
407	0.002716	8	203	26	398
408	0.0031567	10	216	28	422
409	0.0032996	40	221	28	402
410	0.0031712	11	231	25	451
411	0.0036799	52	230	29	408
412	0.0032749	1	206	25	411
413	0.0030992	64	258	26	452
414	0.0030773	32	238	26	444
415	0.0029111	26	212	27	398
416	0.0030383	59	220	29	381
417	0.0027815	49	237	29	425
418	0.0031012	69	253	29	437
419	0.0031068	80	236	23	392
420	0.002951	6	201	27	396
421	0.0030714	32	220	28	408
422	0.0030534	4	240	29	476
423	0.00289	10	190	24	370
424	0.0029857	14	206	24	398
425	0.0030874	120	276	27	432
426	0.0029108	32	226	24	420
427	0.0029066	31	200	26	369
428	0.0031438	27	216	24	405
429	0.0027931	42	236	29	430
430	0.0030666	36	219	24	402
431	0.0032602	12	230	29	448
432	0.0033402	2	226	24	450
433	0.0031843	25	234	23	443
434	0.0034835	65	239	27	413
435	0.0030512	23	215	29	407
436	0.00296	66	248	27	430
437	0.0029824	8	221	24	434
438	0.0029342	14	211	29	408
439	0.003334	41	216	24	391
440	0.0032034	16	220	25	424
441	0.0029394	3	198	28	393
442	0.0029673	22	225	26	428
443	0.0028176	23	235	23	447
444	0.0034317	19	200	24	381
445	0.0030066	93	238	23	383
446	0.0032151	15	223	26	431
447	0.0032932	31	227	27	423
448	0.0027538	9	213	29	417
449	0.0031646	90	257	28	424
450	0.0028047	113	277	23	441
451	0.0032002	1	218	27	435
452	0.00326	72	221	26	370
453	0.0032535	36	210	26	384
454	0.0034183	24	203	25	382
455	0.002739	38	209	29	380
456	0.0028611	50	233	27	416
457	0.0030925	22	217	26	412
458	0.0027516	25	212	27	399
459	0.0030097	4	202	29	400
460	0.0030626	18	215	22	412
461	0.0031194	34	217	26	400
462	0.0029611	2	190	27	378
463	0.002827	106	272	28	438
464	0.0027921	32	229	29	426
465	0.0028772	87	263	27	439
466	0.0031756	2	199	22	396
467	0.0031484	39	214	24	389
468	0.0032177	29	223	25	417
469	0.0035547	39	209	27	379
470	0.0027327	27	214	27	401
471	0.0030164	65	229	27	393
472	0.0030523	32	241	25	450
473	0.0030603	58	233	24	408
474	0.0031377	105	251	25	397
475	0.0031808	17	239	26	461
476	0.0031584	47	239	29	431
477	0.0029759	28	189	27	350
478	0.0034296	11	199	25	387
479	0.003302	48	233	25	418
480	0.0030503	1	214	25	427
481	0.0033251	40	225	22	410
482	0.0030851	11	221	29	431
483	0.0033431	40	220	28	400
484	0.0030817	5	176	28	347
485	0.003057	21	203	26	385
486	0.0031292	15	192	26	369
487	0.0027433	57	225	20	393
488	0.0029731	55	248	27	441
489	0.0032522	12	214	26	416
490	0.0029465	118	268	24	418
491	0.0031899	22	239	27	456
492	0.0032584	10	208	29	406
493	0.0029898	30	250	26	470
494	0.0032779	62	247	25	432
495	0.0033312	1	210	26	419
496	0.0032913	48	243	25	438
497	0.0031519	1	180	26	359
498	0.003365	22	232	27	442
499	0.0027634	21	219	27	417
500	0.0031108	70	230	26	390
501	0.0033941	22	247	25	472
502	0.0030394	78	250	29	422
503	0.0032143	32	229	26	426
504	0.0030203	1	210	29	419
505	0.0031652	2	198	24	394
506	0.0028196	52	222	29	392
507	0.003018	67	228	24	389
508	0.0030743	56	235	26	414
509	0.0031045	62	241	26	420
510	0.0034085	61	245	24	429
511	0.0032095	61	243	24	425
512	0.0030565	12	234	27	456
513	0.0028482	44	223	27	402
514	0.0029298	52	230	28	408
515	0.0029593	8	220	28	432
516	0.0031634	84	284	27	484
517	0.0031145	2	223	25	444
518	0.0031268	6	227	27	448
519	0.0031569	59	248	26	437
520	0.0029281	72	244	29	416
521	0.0027868	25	242	28	459
522	0.0031046	8	203	28	398
523	0.0030534	57	242	28	427
524	0.0028454	44	216	26	388
525	0.0033668	39	218	26	397
526	0.0031059	4	187	28	370
527	0.0029847	7	206	29	405
528	0.0027143	75	261	29	447
529	0.002918	41	209	26	377
530	0.0030163	108	235	26	362
531	0.0031539	36	225	23	414
532	0.0030039	87	239	28	391
533	0.0033582	40	220	26	400
534	0.0028333	68	219	29	370
535	0.0029081	39	214	24	389
536	0.0030015	22	202	29	382
537	0.0029602	45	247	27	449
538	0.0028333	10	175	24	340
539	0.0030287	68	247	29	426
540	0.0032188	2	206	25	410
541	0.0028036	78	256	27	434
542	0.0029139	30	211	25	392
543	0.0032019	43	232	26	421
544	0.0032255	78	260	27	442
545	0.0032661	1	205	27	409
546	0.003072	90	276	25	462
547	0.0028547	90	254	27	418
548	0.0029703	1	219	27	437
549	0.003145	40	223	27	406
550	0.003077	12	187	26	362
551	0.0030465	60	222	24	384
552	0.003041	29	206	28	383
553	0.0031754	19	207	23	395
554	0.0027086	12	204	29	396
555	0.0029889	26	247	25	468
556	0.0035025	118	276	28	434
557	0.0028604	4	201	27	398
558	0.0032751	25	236	26	447
559	0.0028972	85	232	26	379
560	0.0029642	27	220	24	413
561	0.0029193	109	274	29	439
562	0.0031537	20	227	25	434
563	0.0034049	8	209	28	410
564	0.0030938	9	184	25	359
565	0.0032658	47	246	23	445
566	0.0029437	20	212	27	404
567	0.0030967	9	192	22	375
568	0.003422	0	201	28	402
569	0.0030133	32	231	28	430
570	0.0027128	27	211	27	395
571	0.0030538	12	202	26	392
572	0.0030311	59	240	29	421
573	0.0031936	19	200	26	381
574	0.0032099	21	204	25	387
575	0.0032554	87	265	28	443
576	0.0034036	47	228	24	409
577	0.0030465	1	162	25	323
578	0.0030576	26	236	29	446
579	0.003077	12	195	28	378
580	0.0032682	59	237	27	415
581	0.0030932	17	216	27	415
582	0.0031904	29	222	22	415
583	0.0034608	23	208	26	393
584	0.0028351	37	251	24	465
585	0.0030204	9	202	28	395
586	0.0031935	18	204	22	390
587	0.0029496	84	261	26	438
588	0.003137	170	280	28	390
589	0.0030734	91	254	26	417
590	0.0029907	19	202	29	385
591	0.0032127	19	198	29	377
592	0.0029798	69	243	29	417
593	0.0032292	36	203	22	370
594	0.0029937	45	221	28	397
595	0.0033599	41	256	26	471
596	0.0027595	24	225	28	426
597	0.003091	2	209	25	416
598	0.0028486	14	194	23	374
599	0.0032508	18	206	27	394
600	0.0034599	99	274	25	449
601	0.0030609	86	265	28	444
602	0.0035719	3	184	29	365
603	0.0033213	2	201	23	400
604	0.0033749	111	258	26	405
605	0.0031331	10	221	25	432
606	0.0030387	103	263	26	423
607	0.0030757	65	247	26	429
608	0.0034506	24	227	23	430
609	0.0031635	36	223	28	410
610	0.0031915	92	245	24	398
611	0.0032209	16	220	27	424
612	0.0028232	44	216	27	388
613	0.0028093	43	221	23	399
614	0.0030511	3	214	27	425
615	0.0029628	51	249	27	447
616	0.0028196	69	224	29	379
617	0.0030226	8	223	27	438
618	0.0030636	11	204	27	397
619	0.0029256	38	199	24	360
620	0.003148	75	219	24	363
621	0.0031789	31	201	24	371
622	0.0031054	58	233	26	408
623	0.0030912	18	216	24	414
624	0.0029948	8	215	28	422
625	0.0033579	17	231	22	445
626	0.0030155	19	218	28	417
627	0.0031459	63	208	26	353
628	0.0027282	52	222	26	392
629	0.0034848	18	221	25	424
630	0.0032002	7	206	26	405
631	0.0031555	45	238	23	431
632	0.0035211	39	214	24	389
633	0.0030246	64	255	28	446
634	0.0029047	69	244	24	419
635	0.0031123	77	244	27	411
636	0.0028614	85	264	27	443
637	0.0030525	70	236	29	402
638	0.0029994	17	219	26	421
639	0.003067	28	212	25	396
640	0.0031044	5	223	25	441
641	0.0030456	2	212	26	422
642	0.0028023	40	213	28	386
643	0.0033449	1	205	28	409
644	0.0030895	15	242	28	469
645	0.0034079	2	204	23	406
646	0.0030223	37	217	25	397
647	0.003646	4	205	27	406
648	0.0030641	95	262	29	429
649	0.0031911	5	229	25	453
650	0.0034161	127	279	27	431
651	0.0030174	37	226	24	415
652	0.0030888	40	230	28	420
653	0.00299	22	230	29	438
654	0.0030039	52	227	26	402
655	0.003192	45	242	29	439
656	0.0028089	25	224	27	423
657	0.0034106	1	209	26	417
658	0.0030758	74	230	25	386
659	0.0028186	52	216	23	380
660	0.0034114	48	220	28	392
661	0.0032073	5	206	22	407
662	0.0030108	11	200	27	389
663	0.0030102	7	206	27	405
664	0.0031045	23	209	27	395
665	0.0030213	69	232	28	395
666	0.0030024	18	204	29	390
667	0.0035194	51	253	24	455
668	0.0031997	12	174	29	336
669	0.0030096	43	223	23	403
670	0.0030166	1	221	28	441
671	0.0031448	54	235	24	416
672	0.0028854	120	289	26	458
673	0.0029663	135	292	25	449
674	0.0033409	25	225	28	425
675	0.003207	10	221	25	432
676	0.0029759	25	232	25	439
677	0.0033179	43	214	29	385
678	0.0032131	32	198	27	364
679	0.0032551	12	207	22	402
680	0.0030699	37	217	26	397
681	0.0031772	20	204	28	388
682	0.0033604	33	231	28	429
683	0.0031818	23	196	23	369
684	0.0028477	43	213	29	383
685	0.0035307	21	201	28	381
686	0.0033519	20	213	28	406
687	0.0030885	10	214	26	418
688	0.0033993	5	198	26	391
689	0.0034315	72	245	26	418
690	0.0030848	55	241	29	427
691	0.0032446	10	191	25	372
692	0.0030848	94	272	28	450
693	0.0032729	16	192	27	368
694	0.0031243	50	234	29	418
695	0.003112	77	248	27	419
696	0.0032174	37	242	28	447
697	0.0032192	86	253	28	420
698	0.0029627	10	217	28	424
699	0.0032796	23	213	29	403
700	0.0031033	6	230	27	454
701	0.0032201	7	212	26	417
702	0.0030117	13	210	25	407
703	0.0030831	34	208	29	382
704	0.0030658	41	221	26	401
705	0.002838	58	207	27	356
706	0.0032006	19	219	25	419
707	0.0034945	10	225	28	440
708	0.0028246	59	238	24	417
709	0.0032225	12	212	27	412
710	0.0032673	40	238	26	436
711	0.0033708	46	200	24	354
712	0.0033455	2	216	25	430
713	0.0030997	13	215	27	417
714	0.0030723	7	218	26	429
715	0.003143	26	200	29	374
716	0.0033219	39	219	29	399
717	0.0032272	16	185	22	354
718	0.0029444	13	213	29	413
719	0.0031188	12	188	27	364
720	0.0035641	8	215	25	422
721	0.0030558	9	208	27	407
722	0.0033503	59	234	23	409
723	0.0029475	4	215	26	426
724	0.0034461	33	213	26	393
725	0.0027658	106	251	28	396
726	0.0027767	57	245	29	433
727	0.0030074	32	220	26	408
728	0.0030422	2	188	28	374
729	0.0031142	14	222	26	430
730	0.0033564	62	239	29	416
731	0.0032299	5	206	24	407
732	0.0030067	65	230	26	395
733	0.0033472	81	237	28	393
734	0.0031489	5	208	27	411
735	0.0029422	46	251	27	456
736	0.0032994	4	223	28	442
737	0.0031944	51	214	25	377
738	0.0030796	2	217	29	432
739	0.0031049	13	225	27	437
740	0.0030372	4	200	23	396
741	0.0030689	10	203	28	396
742	0.0030945	76	249	23	422
743	0.0030383	1	189	24	377
744	0.0031137	108	267	23	426
745	0.0027677	72	251	28	430
746	0.0033637	11	218	26	425
747	0.0030947	12	220	27	428
748	0.0032133	27	205	23	383
749	0.0029637	27	188	24	349
750	0.00327	10	207	24	404
751	0.0031855	29	208	25	387
752	0.0030378	14	220	24	426
753	0.0031397	7	198	27	389
754	0.0033447	0	207	24	414
755	0.0030925	74	252	24	430
756	0.003073	1	184	23	367
757	0.0034537	24	198	27	372
758	0.0032389	10	214	24	418
759	0.0030284	2	197	28	392
760	0.0029302	51	250	27	449
761	0.0030682	48	233	28	418
762	0.0028196	7	206	28	405
763	0.0028973	21	230	27	439
764	0.0032145	39	227	25	415
765	0.0031194	0	213	26	426
766	0.0030195	30	215	29	400
767	0.0030554	21	213	24	405
768	0.0030397	9	210	22	411
769	0.0031578	5	209	25	413
770	0.0027813	38	205	24	372
771	0.0031288	57	228	23	399
772	0.0031995	15	197	23	379
773	0.0031665	35	226	24	417
774	0.0030532	62	245	24	428
775	0.0033585	68	251	29	434
776	0.0030892	73	249	29	425
777	0.0030163	29	209	22	389
778	0.0032794	0	206	28	412
779	0.0030732	83	252	22	421
780	0.0030438	73	237	26	401
781	0.0029516	63	230	24	397
782	0.003619	70	247	28	424
783	0.0028044	5	228	25	451
784	0.0028958	58	227	29	396
785	0.0035913	9	214	29	419
786	0.0032943	148	274	25	400
787	0.0030249	37	208	28	379
788	0.0033715	78	249	24	420
789	0.0030987	28	220	23	412
790	0.0030991	37	229	25	421
791	0.002768	75	231	21	387
792	0.0031988	4	210	25	416
793	0.0030504	65	242	22	419
794	0.0032575	64	237	29	410
795	0.0032391	7	195	25	383
796	0.0031212	21	211	23	401
797	0.0029506	1	227	29	453
798	0.0033136	7	203	21	399
799	0.0034015	81	246	25	411
800	0.0035003	22	205	25	388
801	0.0031292	55	218	26	381
802	0.0029224	13	212	27	411
803	0.0030724	30	221	25	412
804	0.0029977	46	210	25	374
805	0.0033343	8	214	27	420
806	0.0029017	35	215	27	395
807	0.0030667	13	224	26	435
808	0.0034148	70	259	27	448
809	0.0030805	38	215	23	392
810	0.0030722	65	251	29	437
811	0.0031782	64	240	24	416
812	0.0032143	40	224	29	408
813	0.0031462	125	282	26	439
814	0.0028429	18	211	25	404
815	0.0031571	41	186	20	331
816	0.0031081	16	219	27	422
817	0.00274	5	211	29	417
818	0.0035364	57	240	23	423
819	0.0034654	15	199	26	383
820	0.0034773	27	225	29	423
821	0.0030261	130	291	29	452
822	0.0035762	72	247	29	422
823	0.0031185	17	209	26	401
824	0.003215	27	201	29	375
825	0.003116	29	221	26	413
826	0.0029852	97	249	26	401
827	0.0033991	2	176	22	350
828	0.0031574	13	190	28	367
829	0.0031059	24	228	25	432
830	0.0032907	32	213	29	394
831	0.0031722	2	211	25	420
832	0.0030325	12	236	24	460
833	0.0029926	44	214	29	384
834	0.0033766	73	257	28	441
835	0.0030946	46	199	26	352
836	0.0034137	4	232	26	460
837	0.0033054	13	214	24	415
838	0.003135	24	206	24	388
839	0.0028048	48	233	28	418
840	0.002745	97	256	29	415
841	0.003246	23	206	22	389
842	0.0035502	77	269	26	461
843	0.0031983	41	250	25	459
844	0.0032666	20	207	24	394
845	0.003255	23	216	29	409
846	0.0031914	28	227	26	426
847	0.0031864	19	215	29	411
848	0.0027857	49	223	20	397
849	0.0031342	10	221	23	432
850	0.002944	5	194	26	383
851	0.0031858	13	201	28	389
852	0.0032137	7	217	29	427
853	0.0027685	7	226	27	445
854	0.003047	6	199	26	392
855	0.0028827	52	213	26	374
856	0.003176	91	283	28	475
857	0.003403	54	241	26	428
858	0.003101	52	224	25	396
859	0.0030353	91	262	28	433
860	0.0032565	9	200	29	391
861	0.0032424	39	222	23	405
862	0.002708	27	229	27	431
863	0.0028957	41	229	29	417
864	0.0031822	1	212	24	423
865	0.0032266	7	199	26	391
866	0.0031453	33	235	28	437
867	0.0032479	16	205	25	394
868	0.0031258	52	237	26	422
869	0.0032714	55	227	27	399
870	0.0030744	85	259	25	433
871	0.0031893	44	225	23	406
872	0.003284	11	223	28	435
873	0.0034972	45	219	26	393
874	0.0031029	38	223	25	408
875	0.0031099	10	199	23	388
876	0.0031339	3	202	27	401
877	0.0030578	76	218	27	360
878	0.0031604	36	209	23	382
879	0.003208	83	268	29	453
880	0.0032425	14	215	23	416
881	0.0034598	14	208	29	402
882	0.0030648	81	237	25	393
883	0.0032959	56	229	27	402
884	0.0031401	52	226	27	400
885	0.0030576	29	220	22	411
886	0.0028391	66	238	23	410
887	0.0029333	19	226	21	433
888	0.0029996	24	230	23	436
889	0.0035386	37	222	25	407
890	0.0029065	115	241	23	367
891	0.0032157	56	210	22	364
892	0.0031497	11	190	27	369
893	0.0032652	12	224	23	436
894	0.0030735	21	225	23	429
895	0.0030053	45	255	26	465
896	0.0028296	20	217	22	414
897	0.0027602	7	225	25	443
898	0.0029461	31	212	26	393
899	0.003069	6	186	26	366
900	0.0030616	31	218	22	405
901	0.0034296	48	226	25	404
902	0.0028102	38	213	28	388
903	0.0027351	57	242	27	427
904	0.0030975	39	220	28	401
905	0.0031467	16	213	28	410
906	0.0030538	22	223	25	424
907	0.0030742	34	221	25	408
908	0.0032591	48	220	23	392
909	0.0031223	39	233	26	427
910	0.0030511	62	227	21	392
911	0.0028618	25	228	28	431
912	0.0035126	100	280	25	460
913	0.0033132	9	218	26	427
914	0.0031125	6	214	25	422
915	0.0031666	38	234	28	430
916	0.0029228	63	243	27	423
917	0.0030259	17	204	27	391
918	0.0032106	43	223	28	403
919	0.0037275	1	200	21	399
920	0.0031636	35	199	24	363
921	0.0030992	1	199	27	397
922	0.0032888	47	232	25	417
923	0.0033584	20	221	23	422
924	0.0032227	49	218	26	387
925	0.0032281	12	201	26	390
926	0.0030053	92	267	29	442
927	0.0031003	26	214	26	402
928	0.0034198	41	233	27	425
929	0.0032635	100	244	24	388
930	0.0032332	143	278	26	413
931	0.0031422	28	209	24	390
932	0.0033555	95	263	26	431
933	0.0030328	11	216	26	421
934	0.0029042	5	196	24	387
935	0.0030339	27	210	26	393
936	0.0032361	25	207	23	389
937	0.0028647	74	256	28	438
938	0.0032199	19	216	24	413
939	0.0029921	34	226	26	418
940	0.0032639	19	219	29	419
941	0.0032659	6	197	26	388
942	0.0031126	31	218	29	405
943	0.0028917	29	227	23	425
944	0.0035637	52	219	25	386
945	0.0032316	45	249	29	453
946	0.0030405	65	251	25	437
947	0.003186	15	226	29	437
948	0.0031877	13	199	26	385
949	0.0030607	36	229	22	422
950	0.0032254	18	198	27	378
951	0.0028622	9	232	25	455
952	0.0031949	52	219	28	386
953	0.0032719	120	260	26	400
954	0.0030646	51	238	27	425
955	0.0030668	35	214	28	393
956	0.0031841	31	237	23	443
957	0.0031422	63	237	27	411
958	0.0033823	21	224	25	427
959	0.0029214	30	238	25	446
960	0.0033489	38	238	25	438
961	0.0033441	0	212	28	424
962	0.0030658	78	262	26	446
963	0.0032242	34	210	28	386
964	0.0029446	39	216	29	393
965	0.0031257	10	230	28	450
966	0.002961	145	299	21	453
967	0.0029367	75	264	29	453
968	0.0030989	2	197	21	392
969	0.0027312	11	201	26	391
970	0.0031043	162	316	28	470
971	0.0030838	36	210	26	384
972	0.0037041	24	222	23	420
973	0.002913	26	223	24	420
974	0.0031171	19	197	23	375
975	0.0031249	102	264	28	426
976	0.0030685	18	195	28	372
977	0.0030353	17	200	29	383
978	0.0031995	32	232	27	432
979	0.003286	44	227	20	410
980	0.0032002	47	231	23	415
981	0.0033137	35	206	24	377
982	0.0031073	20	204	23	388
983	0.003065	2	213	24	424
984	0.0027831	28	231	24	434
985	0.0030332	55	233	25	411
986	0.0030356	104	239	29	374
987	0.0030569	50	265	27	480
988	0.0044312	144	288	27	432
989	0.0032783	34	211	29	388
990	0.0031289	38	234	28	430
991	0.003029	22	194	28	366
992	0.0031189	31	229	28	427
993	0.0033068	10	201	21	392
994	0.0032361	19	233	24	447
995	0.0031122	70	244	25	418
996	0.0029434	47	232	25	417
997	0.002998	126	274	26	422
998	0.0031864	30	230	28	430
999	0.0029133	12	205	28	398
mean	0.00311251	37.708	224.126	26.024	410.544

## Sheet: DACC_D
	time	SEq	Bal	Reg	Egal
0	0.0010295	19	193	22	367
1	0.0009581	7	222	22	437
2	0.0010789	9	234	29	459
3	0.0009964	6	215	27	424
4	0.0009533	14	202	28	390
5	0.0011852	34	215	23	396
6	0.0009796	83	251	27	419
7	0.0010488	5	192	24	379
8	0.0008919	10	188	24	366
9	0.0009835	32	202	23	372
10	0.0010948	42	235	24	428
11	0.0010699	63	253	22	443
12	0.0010046	36	218	28	400
13	0.0011561	53	246	24	439
14	0.0010271	52	226	29	400
15	0.0009797	20	205	27	390
16	0.0010389	25	218	27	411
17	0.0011002	35	241	29	447
18	0.0010231	11	220	25	429
19	0.0009361	51	248	23	445
20	0.0010457	36	224	22	412
21	0.0010385	31	229	29	427
22	0.0009761	16	213	28	410
23	0.0008965	32	205	29	378
24	0.0009909	9	203	24	397
25	0.0010554	60	256	27	452
26	0.0009733	44	234	27	424
27	0.0009543	49	217	29	385
28	0.0010109	8	210	24	412
29	0.0009149	46	224	26	402
30	0.0011246	119	285	24	451
31	0.001016	26	236	25	446
32	0.0011407	66	243	28	420
33	0.0010488	47	238	25	429
34	0.0010721	44	225	25	406
35	0.0009898	21	197	25	373
36	0.0008578	7	183	29	359
37	0.0010165	5	236	28	467
38	0.0010269	91	240	24	389
39	0.0009469	51	220	25	389
40	0.0009794	4	212	24	420
41	0.0010468	34	230	29	426
42	0.0010529	31	218	27	405
43	0.0009565	39	227	29	415
44	0.0010914	68	244	27	420
45	0.0010513	69	238	27	407
46	0.0009818	49	247	23	445
47	0.000969	7	216	29	425
48	0.0009882	8	189	27	370
49	0.0010466	17	216	28	415
50	0.0011445	31	226	23	421
51	0.0010673	67	243	29	419
52	0.0010678	33	242	29	451
53	0.0009751	13	220	24	427
54	0.001127	84	243	29	402
55	0.0009185	51	227	27	403
56	0.0009707	23	234	26	445
57	0.0010257	62	217	23	372
58	0.0010218	6	202	29	398
59	0.0009448	9	207	24	405
60	0.0011629	84	236	26	388
61	0.0010806	149	295	27	441
62	0.0011093	18	238	28	458
63	0.0009515	11	217	23	423
64	0.0011469	10	194	25	378
65	0.0010064	4	235	29	466
66	0.001079	26	237	24	448
67	0.0010716	88	237	22	386
68	0.0011216	46	225	28	404
69	0.0009988	24	194	23	364
70	0.0009951	34	216	23	398
71	0.0009658	30	206	26	382
72	0.0012086	117	285	27	453
73	0.0011029	37	237	29	437
74	0.0009862	24	217	23	410
75	0.001398	64	245	25	426
76	0.0010532	25	249	26	473
77	0.0009315	153	261	25	369
78	0.0010214	28	202	27	376
79	0.0011447	20	207	27	394
80	0.001095	71	260	28	449
81	0.0010891	32	215	27	398
82	0.0010898	155	287	27	419
83	0.0010376	69	255	27	441
84	0.001126	65	244	22	423
85	0.0009492	2	202	27	402
86	0.0009378	27	214	28	401
87	0.001027	3	238	25	473
88	0.0009962	21	201	27	381
89	0.0009426	29	216	26	403
90	0.0010409	30	238	24	446
91	0.0010481	14	202	23	390
92	0.0010781	116	298	28	480
93	0.001147	54	225	28	396
94	0.0009774	9	225	29	441
95	0.0009779	1	216	29	431
96	0.0009475	75	235	23	395
97	0.0009759	53	236	28	419
98	0.0008965	40	203	24	366
99	0.0009742	9	207	27	405
100	0.0009755	24	223	26	422
101	0.0010288	83	237	26	391
102	0.0009522	2	189	25	376
103	0.0009736	43	232	28	421
104	0.001133	72	233	29	394
105	0.001103	36	223	25	410
106	0.0012511	100	263	29	426
107	0.0011556	35	207	25	379
108	0.0011939	101	263	27	425
109	0.0011227	9	224	29	439
110	0.0010816	42	256	28	470
111	0.0010246	25	208	27	391
112	0.0009249	14	221	27	428
113	0.000975	71	245	25	419
114	0.0010204	10	230	29	450
115	0.001117	56	219	24	382
116	0.0009887	36	233	29	430
117	0.0009795	33	226	22	419
118	0.00094	49	215	28	381
119	0.0011372	36	246	29	456
120	0.0010412	49	242	29	435
121	0.0010237	95	248	28	401
122	0.0010831	6	203	24	400
123	0.0009513	56	248	25	440
124	0.0010541	41	242	27	443
125	0.0009919	63	233	23	403
126	0.0010012	51	217	29	383
127	0.0010018	40	249	25	458
128	0.000877	57	219	27	381
129	0.000984	13	221	29	429
130	0.0010617	16	232	28	448
131	0.0008592	45	224	29	403
132	0.0010249	4	184	24	364
133	0.0010766	57	241	27	425
134	0.0011144	51	205	27	359
135	0.0008919	15	197	20	379
136	0.0012049	13	225	26	437
137	0.0011343	85	244	26	403
138	0.0010053	19	234	25	449
139	0.0009564	20	200	27	380
140	0.0010406	21	198	23	375
141	0.0009389	77	257	28	437
142	0.0009492	21	215	29	409
143	0.0008983	11	209	28	407
144	0.0010946	19	223	24	427
145	0.0009544	16	198	25	380
146	0.0012133	13	220	27	427
147	0.0011383	25	227	28	429
148	0.0008969	15	206	25	397
149	0.0009689	46	270	28	494
150	0.0009014	21	199	25	377
151	0.0009625	2	209	26	416
152	0.0009863	18	233	26	448
153	0.0010389	8	214	28	420
154	0.0009766	4	199	26	394
155	0.0009617	35	238	28	441
156	0.0010873	129	263	26	397
157	0.0009535	81	248	27	415
158	0.0011044	68	248	28	428
159	0.0012541	42	230	22	418
160	0.0011292	64	246	28	428
161	0.0009958	47	198	27	349
162	0.0009468	24	227	24	430
163	0.0009235	77	267	23	457
164	0.001022	18	228	23	438
165	0.001084	67	254	27	441
166	0.0009376	25	195	28	365
167	0.0010602	16	231	26	446
168	0.00148	22	205	29	388
169	0.0008805	39	235	29	431
170	0.0009836	13	203	29	393
171	0.0009261	28	212	21	396
172	0.0011508	97	262	28	427
173	0.0009751	11	209	28	407
174	0.0010501	23	230	29	437
175	0.0010142	16	219	27	422
176	0.0011824	16	230	28	444
177	0.0009803	3	220	27	437
178	0.0010996	92	269	28	446
179	0.0009813	32	217	24	402
180	0.0010339	13	229	26	445
181	0.0011431	47	215	24	383
182	0.0012175	78	270	28	462
183	0.001019	37	258	26	479
184	0.0009241	23	201	25	379
185	0.0011258	25	253	29	481
186	0.0009442	28	221	28	414
187	0.0009858	26	234	25	442
188	0.0009145	30	197	26	364
189	0.0009173	53	197	27	341
190	0.0010311	34	203	22	372
191	0.0010382	9	220	25	431
192	0.0010012	44	237	28	430
193	0.0008861	85	239	27	393
194	0.0009347	74	247	29	420
195	0.0009367	9	173	24	337
196	0.0010689	30	219	29	408
197	0.0012294	9	216	24	423
198	0.0010099	107	262	26	417
199	0.0009591	45	242	28	439
200	0.0009713	5	202	26	399
201	0.0011119	71	260	28	449
202	0.0010813	26	236	29	446
203	0.0008861	40	220	29	400
204	0.0010306	56	230	28	404
205	0.0010802	91	247	29	403
206	0.0011801	74	244	29	414
207	0.00103	100	252	28	404
208	0.0010177	25	214	28	403
209	0.0009108	7	209	22	411
210	0.0010377	37	222	27	407
211	0.0009133	19	213	26	407
212	0.0010649	53	242	24	431
213	0.0010336	34	223	29	412
214	0.0008297	110	255	28	400
215	0.000995	5	209	29	413
216	0.0009462	62	232	25	402
217	0.0010487	18	230	25	442
218	0.0012177	71	250	26	429
219	0.0011155	84	276	27	468
220	0.0010451	40	233	26	426
221	0.0011331	44	222	24	400
222	0.0009589	59	225	22	391
223	0.0009406	60	219	28	378
224	0.001033	67	255	29	443
225	0.0011625	68	224	29	380
226	0.0009658	20	200	28	380
227	0.0009477	1	213	24	425
228	0.0008816	48	221	27	394
229	0.001052	47	230	22	413
230	0.0009913	59	235	27	411
231	0.0009202	39	233	27	427
232	0.0008315	94	256	25	418
233	0.000972	72	239	28	406
234	0.0009895	17	223	28	429
235	0.0010833	26	237	23	448
236	0.0011165	22	247	26	472
237	0.0011812	32	222	25	412
238	0.0011742	76	246	29	416
239	0.0010349	6	221	28	436
240	0.0011376	34	229	24	424
241	0.0008927	59	227	27	395
242	0.0010133	21	204	24	387
243	0.0011411	108	273	26	438
244	0.000972	20	208	29	396
245	0.001186	12	213	26	414
246	0.0010736	72	237	26	402
247	0.0009999	8	199	25	390
248	0.0011153	17	210	28	403
249	0.0009916	4	201	26	398
250	0.0011252	67	218	23	369
251	0.0009703	16	221	24	426
252	0.0010033	25	223	25	421
253	0.0012454	0	202	25	404
254	0.0009436	57	217	28	377
255	0.0010012	85	221	23	357
256	0.0010073	106	253	26	400
257	0.0010337	1	215	27	429
258	0.0010414	64	231	29	398
259	0.0009263	20	224	27	428
260	0.000945	5	197	27	389
261	0.0009503	97	269	29	441
262	0.0009694	30	229	27	428
263	0.0009843	6	205	24	404
264	0.001267	51	241	26	431
265	0.0010477	70	271	29	472
266	0.0009347	9	207	27	405
267	0.0008911	13	190	25	367
268	0.0009932	74	232	28	390
269	0.0009097	97	253	29	409
270	0.0010106	42	212	24	382
271	0.0008693	5	191	25	377
272	0.0008749	22	203	19	384
273	0.0010773	36	243	28	450
274	0.0010414	11	205	23	399
275	0.0010839	108	259	26	410
276	0.0009742	39	221	28	403
277	0.0011947	83	251	29	419
278	0.0010395	71	240	28	409
279	0.0010295	21	220	27	419
280	0.0009508	56	238	25	420
281	0.0009484	24	188	29	352
282	0.0010668	1	224	28	447
283	0.0011199	4	217	26	430
284	0.0010905	44	240	28	436
285	0.0011143	74	246	26	418
286	0.0010076	103	267	28	431
287	0.0010509	51	230	24	409
288	0.0009442	36	200	28	364
289	0.0010638	14	185	26	356
290	0.0010647	22	240	28	458
291	0.0010107	29	221	24	413
292	0.0010682	47	242	25	437
293	0.0009377	7	220	25	433
294	0.0010653	13	209	26	405
295	0.0010473	18	231	28	444
296	0.0010887	106	253	28	400
297	0.0010212	25	227	27	429
298	0.0009811	91	265	29	439
299	0.0009066	19	215	24	411
300	0.0009926	10	207	26	404
301	0.0009395	16	220	28	424
302	0.001061	64	237	21	410
303	0.0010379	19	222	29	425
304	0.0009954	50	230	29	410
305	0.0010368	8	224	28	440
306	0.0010925	5	240	27	475
307	0.0010799	5	242	25	479
308	0.0009814	26	217	24	408
309	0.0011248	103	280	26	457
310	0.0012133	95	261	26	427
311	0.0010903	85	273	26	461
312	0.0009887	27	212	23	397
313	0.0011454	30	237	28	444
314	0.0009939	27	205	29	383
315	0.0009673	43	199	29	355
316	0.0008936	3	215	23	427
317	0.0010343	30	229	28	428
318	0.0010347	51	226	22	401
319	0.0014741	123	266	27	409
320	0.0009216	74	262	27	450
321	0.0009147	15	210	28	405
322	0.0011168	5	230	29	455
323	0.0012199	80	245	26	410
324	0.000857	114	283	28	452
325	0.0010067	32	207	25	382
326	0.0010512	43	217	27	391
327	0.001108	48	224	25	400
328	0.0008583	11	201	26	391
329	0.0009932	21	200	19	379
330	0.0011111	97	258	29	419
331	0.0010468	26	250	28	474
332	0.0010766	89	248	26	407
333	0.0010161	48	227	26	406
334	0.0014587	18	217	27	416
335	0.0009931	7	225	29	443
336	0.0009646	22	196	24	370
337	0.000958	12	226	25	440
338	0.000903	83	260	26	437
339	0.0010014	46	215	29	384
340	0.0011198	35	233	24	431
341	0.0012537	12	223	29	434
342	0.0010507	13	194	24	375
343	0.0009852	54	233	28	412
344	0.001063	24	244	29	464
345	0.0011093	24	252	26	480
346	0.0009372	14	202	29	390
347	0.0009432	2	198	24	394
348	0.001116	18	227	23	436
349	0.0010343	31	210	25	389
350	0.0009716	105	255	28	405
351	0.0010362	42	236	29	430
352	0.0009584	41	216	27	391
353	0.0010089	36	200	29	364
354	0.0010167	31	237	28	443
355	0.0009885	7	225	29	443
356	0.0010416	16	214	27	412
357	0.0010202	95	238	29	381
358	0.0010952	30	238	28	446
359	0.0010056	18	204	25	390
360	0.0010593	60	221	24	382
361	0.001013	82	253	28	424
362	0.0009697	3	182	25	361
363	0.0011918	84	256	23	428
364	0.0010908	0	202	29	404
365	0.0009585	61	218	27	375
366	0.000985	35	204	22	373
367	0.0010306	53	227	22	401
368	0.0010309	10	210	23	410
369	0.0009634	102	290	29	478
370	0.0009749	28	219	29	410
371	0.0009807	29	219	28	409
372	0.0009996	34	244	29	454
373	0.0010537	3	197	29	391
374	0.0011032	110	274	24	438
375	0.0009533	7	211	29	415
376	0.0012672	44	256	27	468
377	0.0009312	7	206	23	405
378	0.0010705	23	223	24	423
379	0.000986	56	231	29	406
380	0.0010164	27	212	24	397
381	0.0010622	68	246	29	424
382	0.0010409	49	218	26	387
383	0.0009976	97	253	29	409
384	0.0011097	102	277	25	452
385	0.0010418	29	233	26	437
386	0.0010722	53	227	28	401
387	0.0010035	10	210	25	410
388	0.0010654	29	225	22	421
389	0.0009703	49	213	29	377
390	0.0010536	77	218	29	359
391	0.0009734	109	272	28	435
392	0.0010851	30	226	27	422
393	0.0009677	86	257	29	428
394	0.0008288	86	223	29	360
395	0.0009969	50	206	28	362
396	0.0009855	26	225	28	424
397	0.0009045	40	216	27	392
398	0.0009919	24	214	28	404
399	0.0010144	18	227	29	436
400	0.0010874	39	224	27	409
401	0.0010698	7	187	29	367
402	0.0009742	13	209	23	405
403	0.0010604	38	216	27	394
404	0.0010627	24	226	26	428
405	0.0010703	29	218	28	407
406	0.0011361	26	236	26	446
407	0.0010505	8	203	26	398
408	0.0010301	50	240	28	430
409	0.0010252	76	253	27	430
410	0.0010578	11	231	25	451
411	0.000927	52	230	29	408
412	0.001017	1	206	25	411
413	0.001198	58	255	26	452
414	0.0010833	32	238	26	444
415	0.0009751	26	212	27	398
416	0.0010399	59	220	29	381
417	0.0009062	49	237	29	425
418	0.0010212	69	253	29	437
419	0.0011047	14	204	27	394
420	0.0010629	10	208	27	406
421	0.0010953	55	234	28	413
422	0.001219	9	246	29	483
423	0.0009685	10	190	24	370
424	0.0009921	14	206	24	398
425	0.0012956	93	271	28	449
426	0.0010816	32	226	24	420
427	0.0009814	31	200	26	369
428	0.0010447	84	255	28	426
429	0.0010985	42	236	29	430
430	0.0009472	36	219	24	402
431	0.0010386	40	250	29	460
432	0.0011467	2	226	24	450
433	0.0009599	25	234	23	443
434	0.0011324	47	234	27	421
435	0.0010057	18	224	27	430
436	0.0010007	66	248	27	430
437	0.0009242	8	221	24	434
438	0.001035	51	230	29	409
439	0.0009678	91	239	27	387
440	0.000964	16	220	25	424
441	0.0009701	66	226	29	386
442	0.0011765	35	229	26	423
443	0.0010639	23	235	23	447
444	0.0010345	19	200	24	381
445	0.0009374	24	212	23	400
446	0.0010567	15	223	26	431
447	0.0008857	80	254	27	428
448	0.001057	9	213	29	417
449	0.0010455	71	248	28	425
450	0.001156	113	277	23	441
451	0.0010072	90	268	24	446
452	0.0011386	53	216	26	379
453	0.0010987	95	236	26	377
454	0.0010365	24	203	25	382
455	0.0008372	38	209	29	380
456	0.0010845	50	233	27	416
457	0.0009683	22	217	26	412
458	0.0010458	25	212	27	399
459	0.0010467	4	202	29	400
460	0.0010889	18	215	22	412
461	0.0009642	34	217	26	400
462	0.0008514	2	190	27	378
463	0.0011485	106	272	28	438
464	0.001075	32	229	29	426
465	0.0010854	87	263	27	439
466	0.0010148	2	199	22	396
467	0.0010397	31	213	27	395
468	0.0011616	29	223	25	417
469	0.0010271	39	209	27	379
470	0.0011711	27	214	27	401
471	0.0011081	36	225	28	414
472	0.0009792	53	256	26	459
473	0.0011049	141	279	27	417
474	0.0010016	105	251	25	397
475	0.0010799	10	241	24	472
476	0.0011192	92	266	27	440
477	0.0009205	28	189	27	350
478	0.0010226	32	207	27	382
479	0.001086	98	267	28	436
480	0.0010069	28	237	25	446
481	0.0010113	40	225	22	410
482	0.0011132	16	229	26	442
483	0.0010159	40	220	28	400
484	0.0010082	5	176	28	347
485	0.0009413	45	220	26	395
486	0.0009841	15	192	26	369
487	0.0010261	57	225	20	393
488	0.0011154	55	248	27	441
489	0.0009415	104	264	26	424
490	0.0010337	118	268	24	418
491	0.0010205	22	239	27	456
492	0.0009652	10	208	29	406
493	0.0010251	58	258	27	458
494	0.0010285	27	232	25	437
495	0.001072	90	262	28	434
496	0.0011268	48	243	25	438
497	0.0009645	21	192	26	363
498	0.0010582	22	232	27	442
499	0.0009432	21	219	27	417
500	0.0009809	36	215	26	394
501	0.0010535	63	262	26	461
502	0.001175	78	250	29	422
503	0.0012576	32	229	26	426
504	0.000993	35	232	29	429
505	0.0010287	24	212	23	400
506	0.0010596	52	222	29	392
507	0.0010237	49	223	25	397
508	0.0009821	115	272	26	429
509	0.0011291	62	241	26	420
510	0.000987	60	252	28	444
511	0.0010806	33	233	24	433
512	0.0010469	27	242	27	457
513	0.0010058	44	223	27	402
514	0.0010669	27	226	29	425
515	0.0009965	8	220	28	432
516	0.0011293	103	295	27	487
517	0.0010199	36	236	26	436
518	0.0010169	6	227	27	448
519	0.0010354	26	233	26	440
520	0.0010085	72	244	29	416
521	0.0010202	25	242	28	459
522	0.0010948	8	203	28	398
523	0.0011618	11	223	28	435
524	0.0010885	44	216	26	388
525	0.0010429	111	273	29	435
526	0.0009516	60	218	22	376
527	0.0009013	7	206	29	405
528	0.0010881	75	261	29	447
529	0.0009856	11	198	26	385
530	0.000994	108	235	26	362
531	0.0010177	36	225	23	414
532	0.0012054	51	221	28	391
533	0.0009282	49	225	25	401
534	0.0009715	68	219	29	370
535	0.0010101	39	214	24	389
536	0.0009143	32	205	29	378
537	0.0010552	45	247	27	449
538	0.0008247	10	175	24	340
539	0.0009753	35	232	29	429
540	0.0009686	2	206	25	410
541	0.0011452	78	256	27	434
542	0.0009256	30	211	25	392
543	0.001079	43	232	26	421
544	0.0010818	109	273	29	437
545	0.0009319	21	211	28	401
546	0.00127	58	272	27	486
547	0.0010417	90	254	27	418
548	0.0011076	1	219	27	437
549	0.0009691	40	223	27	406
550	0.0009919	12	187	26	362
551	0.0010786	37	213	24	389
552	0.001034	53	222	27	391
553	0.0010263	19	207	23	395
554	0.0010101	12	204	29	396
555	0.0011733	26	247	25	468
556	0.0010711	118	276	28	434
557	0.0009258	4	201	27	398
558	0.0010742	6	230	26	454
559	0.0009473	85	232	26	379
560	0.0009951	67	246	24	425
561	0.0011791	50	247	29	444
562	0.0010851	20	238	25	456
563	0.0011426	56	256	27	456
564	0.0009939	9	184	25	359
565	0.0010716	120	279	24	438
566	0.0008415	2	206	27	410
567	0.0011443	30	212	23	394
568	0.0010194	5	212	27	419
569	0.0010421	32	231	28	430
570	0.0010225	27	211	27	395
571	0.0010499	79	240	24	401
572	0.0009489	59	240	29	421
573	0.0008589	111	252	29	393
574	0.0009538	21	207	27	393
575	0.0010983	27	243	28	459
576	0.0009744	52	235	26	418
577	0.0009794	40	188	29	336
578	0.0009875	26	236	29	446
579	0.0009508	20	200	26	380
580	0.0009942	9	215	27	421
581	0.001048	17	216	27	415
582	0.0009645	29	222	22	415
583	0.0009887	30	218	25	406
584	0.0011785	37	251	24	465
585	0.0010402	38	221	29	404
586	0.00095	10	203	22	396
587	0.001035	84	261	26	438
588	0.0009566	170	280	28	390
589	0.0010151	41	241	26	441
590	0.0009807	33	213	28	393
591	0.0009204	1	195	29	389
592	0.0009666	69	243	29	417
593	0.0008471	36	203	22	370
594	0.0009829	9	206	28	403
595	0.000997	4	232	27	460
596	0.0009745	24	225	28	426
597	0.0010852	23	221	25	419
598	0.0009054	14	194	23	374
599	0.0009964	18	206	27	394
600	0.0011154	148	301	22	454
601	0.0009569	79	262	28	445
602	0.0009638	3	184	29	365
603	0.0010297	47	231	26	415
604	0.0009385	68	244	27	420
605	0.0009862	11	236	29	461
606	0.0010235	103	263	26	423
607	0.0010806	22	231	26	440
608	0.0010876	24	227	23	430
609	0.00107	36	223	28	410
610	0.0011881	92	245	24	398
611	0.0009375	49	245	26	441
612	0.0010877	44	216	27	388
613	0.0010808	43	221	23	399
614	0.0009905	3	214	27	425
615	0.0011819	51	249	27	447
616	0.001027	69	224	29	379
617	0.0010598	8	223	27	438
618	0.0010783	11	204	27	397
619	0.0009332	38	199	24	360
620	0.0010117	40	223	29	406
621	0.0010104	31	201	24	371
622	0.0010266	58	233	26	408
623	0.0013313	124	269	28	414
624	0.0011227	59	243	28	427
625	0.0009208	83	262	26	441
626	0.0010709	31	220	28	409
627	0.0010256	8	188	26	368
628	0.0010766	52	222	26	392
629	0.0011285	13	220	29	427
630	0.0009518	31	214	26	397
631	0.0013368	45	238	23	431
632	0.0010396	26	213	26	400
633	0.0011577	0	233	28	466
634	0.0011303	43	235	26	427
635	0.0009752	68	241	28	414
636	0.0010953	85	264	27	443
637	0.0009057	57	231	26	405
638	0.0010222	10	221	26	432
639	0.0009978	28	212	25	396
640	0.0011714	5	223	25	441
641	0.0010198	2	212	26	422
642	0.0009696	40	213	28	386
643	0.001063	24	220	28	416
644	0.0010895	15	242	28	469
645	0.0009348	61	234	23	407
646	0.0008969	12	212	25	412
647	0.0009948	28	221	28	414
648	0.0010044	95	262	29	429
649	0.0010678	64	269	29	474
650	0.0009673	47	251	28	455
651	0.0009115	37	226	24	415
652	0.00111	40	230	28	420
653	0.0010011	67	245	29	423
654	0.0009999	52	227	26	402
655	0.0010161	26	234	29	442
656	0.0009738	25	224	27	423
657	0.0009862	70	248	26	426
658	0.00102	74	230	25	386
659	0.0010615	52	216	23	380
660	0.000962	32	220	28	408
661	0.0009693	5	206	22	407
662	0.0009433	11	200	27	389
663	0.0010988	7	206	27	405
664	0.0010105	0	202	29	404
665	0.001039	26	220	29	414
666	0.0010727	18	204	29	390
667	0.0010708	8	224	27	440
668	0.0009447	9	175	29	341
669	0.0009119	14	211	23	408
670	0.0010533	40	241	28	442
671	0.0011395	30	230	24	430
672	0.0011184	120	289	26	458
673	0.0011718	115	285	29	455
674	0.0010106	50	245	27	440
675	0.0010062	10	221	25	432
676	0.0010219	25	232	25	439
677	0.0009693	11	203	28	395
678	0.0010764	25	209	28	393
679	0.0010185	12	207	22	402
680	0.0010202	37	217	26	397
681	0.0010571	10	203	28	396
682	0.001011	43	237	28	431
683	0.0009376	50	212	27	374
684	0.0008941	43	213	29	383
685	0.0009791	21	201	28	381
686	0.0009492	11	211	28	411
687	0.0010497	47	233	26	419
688	0.0009076	96	268	27	440
689	0.0009869	128	275	27	422
690	0.0011016	55	241	29	427
691	0.0009541	10	191	25	372
692	0.0012109	74	263	28	452
693	0.0008829	16	192	27	368
694	0.001076	50	234	29	418
695	0.0011209	57	266	26	475
696	0.0010827	90	267	28	444
697	0.000905	17	224	29	431
698	0.0010477	10	217	28	424
699	0.0010104	30	217	29	404
700	0.0010373	6	230	27	454
701	0.0010238	42	234	26	426
702	0.0009373	11	215	25	419
703	0.0009476	4	194	29	384
704	0.0010068	41	221	26	401
705	0.000984	58	207	27	356
706	0.0012018	19	219	25	419
707	0.0010403	37	226	28	415
708	0.0010542	59	238	24	417
709	0.0011112	83	268	27	453
710	0.0010681	70	263	29	456
711	0.0008817	91	236	28	381
712	0.0010487	27	226	25	425
713	0.0010298	29	217	27	405
714	0.0009955	47	247	26	447
715	0.0010526	100	246	27	392
716	0.0011662	57	232	24	407
717	0.0008277	57	212	25	367
718	0.0010361	13	213	29	413
719	0.0009328	12	188	27	364
720	0.0010365	24	229	25	434
721	0.0011327	9	208	27	407
722	0.0009573	25	212	24	399
723	0.00104	4	215	26	426
724	0.0010284	33	213	26	393
725	0.001237	106	251	28	396
726	0.0012346	57	245	29	433
727	0.0008662	32	220	26	408
728	0.0010406	45	217	28	389
729	0.0010177	14	222	26	430
730	0.0009295	31	224	25	417
731	0.0010442	26	224	23	422
732	0.000986	65	230	26	395
733	0.0011033	58	226	28	394
734	0.0010444	5	208	27	411
735	0.0009668	46	251	27	456
736	0.0011222	4	223	28	442
737	0.0009992	34	209	25	384
738	0.0009194	2	217	29	432
739	0.0012065	1	220	27	439
740	0.0009744	4	200	23	396
741	0.0009562	48	229	28	410
742	0.0009703	76	249	23	422
743	0.0010297	1	189	24	377
744	0.0011794	108	267	23	426
745	0.0011505	72	251	28	430
746	0.0009853	27	230	29	433
747	0.0009243	12	220	27	428
748	0.0009724	27	205	23	383
749	0.0008627	7	189	26	371
750	0.0012571	10	207	24	404
751	0.0009075	34	211	24	388
752	0.0010781	14	220	24	426
753	0.0009766	7	198	27	389
754	0.0009212	0	207	24	414
755	0.0011043	74	252	24	430
756	0.0009689	1	184	23	367
757	0.000966	24	198	27	372
758	0.0009602	30	216	24	402
759	0.0009917	2	197	28	392
760	0.0010169	51	250	27	449
761	0.0011684	4	217	28	430
762	0.0009481	7	206	28	405
763	0.0011042	21	230	27	439
764	0.0009783	44	233	24	422
765	0.0011337	0	213	26	426
766	0.0009546	82	230	29	378
767	0.0010898	21	213	24	405
768	0.0009188	54	237	22	420
769	0.0009264	38	227	25	416
770	0.0010549	38	205	24	372
771	0.0009205	57	228	23	399
772	0.0009834	1	193	23	385
773	0.001055	18	232	28	446
774	0.0009942	62	245	24	428
775	0.0011765	68	251	29	434
776	0.0012308	73	249	29	425
777	0.0008912	9	206	25	403
778	0.0009951	0	206	28	412
779	0.0010874	83	252	22	421
780	0.0009051	58	230	26	402
781	0.0012655	63	230	24	397
782	0.0010889	70	247	28	424
783	0.001058	5	228	25	451
784	0.001128	58	227	29	396
785	0.0011473	12	216	29	420
786	0.0010115	148	274	25	400
787	0.0010367	37	208	28	379
788	0.0010561	49	239	25	429
789	0.0009573	1	212	23	423
790	0.0010935	21	228	27	435
791	0.0012314	75	231	21	387
792	0.0010414	39	219	28	399
793	0.0009823	24	225	26	426
794	0.0009488	8	215	29	422
795	0.0010224	141	269	26	397
796	0.0009394	127	287	28	447
797	0.0011148	34	247	29	460
798	0.0010252	7	203	21	399
799	0.0009774	56	244	25	432
800	0.0010221	67	231	25	395
801	0.0011115	26	210	29	394
802	0.0010023	13	212	27	411
803	0.0010194	55	235	25	415
804	0.0010296	46	210	25	374
805	0.0009349	25	222	27	419
806	0.0010827	35	215	27	395
807	0.0010269	13	224	26	435
808	0.0011285	73	265	28	457
809	0.0010413	12	209	23	406
810	0.0009969	65	251	29	437
811	0.0009648	1	210	24	419
812	0.0011033	40	224	29	408
813	0.0009992	78	265	26	452
814	0.0010157	18	211	25	404
815	0.0008767	44	202	25	360
816	0.0010786	22	227	27	432
817	0.0011847	5	211	29	417
818	0.001055	30	231	23	432
819	0.0009449	6	197	27	388
820	0.0010943	27	225	29	423
821	0.0011059	130	291	29	452
822	0.0010612	30	235	29	440
823	0.0010893	17	209	26	401
824	0.0010087	76	230	29	384
825	0.0009535	7	212	26	417
826	0.0009979	54	229	27	404
827	0.0009082	2	176	22	350
828	0.0010401	13	190	28	367
829	0.0010351	24	228	25	432
830	0.0009701	32	213	29	394
831	0.0009219	2	211	25	420
832	0.0010377	12	236	24	460
833	0.0010798	44	214	29	384
834	0.0011715	31	240	29	449
835	0.0009895	46	199	26	352
836	0.0009879	26	242	26	458
837	0.0011117	6	212	26	418
838	0.0009468	86	248	29	410
839	0.0009571	48	233	28	418
840	0.0011473	97	256	29	415
841	0.0009554	24	212	22	400
842	0.0010356	0	244	27	488
843	0.0012156	4	247	29	490
844	0.0010185	63	240	27	417
845	0.0010093	23	216	29	409
846	0.0009873	36	238	26	440
847	0.0010222	90	254	28	418
848	0.0009747	49	223	20	397
849	0.0010123	45	238	23	431
850	0.000969	24	213	26	402
851	0.0010766	13	201	28	389
852	0.0010131	7	217	29	427
853	0.001035	7	226	27	445
854	0.0009797	6	199	26	392
855	0.0011709	52	213	26	374
856	0.0011246	91	283	28	475
857	0.0010931	35	232	26	429
858	0.0010276	14	209	25	404
859	0.0010248	91	262	28	433
860	0.0009327	9	200	29	391
861	0.0009836	104	255	27	406
862	0.0011727	27	229	27	431
863	0.0011293	41	229	29	417
864	0.0011304	1	212	24	423
865	0.000976	38	222	26	406
866	0.0010387	4	223	28	442
867	0.0009867	36	215	25	394
868	0.0010327	28	230	29	432
869	0.0010264	42	238	27	434
870	0.0013409	85	259	25	433
871	0.0010221	44	225	23	406
872	0.001005	11	223	28	435
873	0.0009517	80	229	28	378
874	0.0009309	70	243	26	416
875	0.0009522	30	209	24	388
876	0.0010081	20	209	29	398
877	0.0010175	76	218	27	360
878	0.0009604	3	193	23	383
879	0.0010603	83	268	29	453
880	0.000991	29	223	23	417
881	0.0009283	8	200	29	392
882	0.0011437	81	237	25	393
883	0.0011045	30	216	27	402
884	0.001073	5	216	27	427
885	0.0010986	29	220	22	411
886	0.0011376	66	238	23	410
887	0.0010272	19	226	21	433
888	0.0009905	24	230	23	436
889	0.0009623	140	280	29	420
890	0.0010023	115	241	23	367
891	0.0008923	56	210	22	364
892	0.0010975	17	197	26	377
893	0.0009724	29	233	23	437
894	0.0010496	47	234	27	421
895	0.0011037	45	255	26	465
896	0.0012066	20	217	22	414
897	0.0010601	7	225	25	443
898	0.0009544	31	212	26	393
899	0.0009984	6	186	26	366
900	0.0009095	31	218	22	405
901	0.0010516	48	237	28	426
902	0.0010048	38	213	28	388
903	0.0009768	57	242	27	427
904	0.0010147	76	240	28	404
905	0.0009179	16	213	28	410
906	0.0009665	22	223	25	424
907	0.0010063	34	221	25	408
908	0.0010802	48	220	23	392
909	0.0010056	39	233	26	427
910	0.0009864	62	227	21	392
911	0.0010028	25	228	28	431
912	0.0010241	15	226	27	437
913	0.0009954	9	218	26	427
914	0.0009438	19	222	29	425
915	0.0009699	38	234	28	430
916	0.0010771	63	243	27	423
917	0.001325	66	239	29	412
918	0.0008754	87	239	29	391
919	0.0008696	1	200	21	399
920	0.0009774	44	218	24	392
921	0.0010563	1	199	27	397
922	0.0010181	80	243	29	406
923	0.0009183	12	218	23	424
924	0.0009173	49	218	26	387
925	0.0009909	21	208	26	395
926	0.0010233	92	267	29	442
927	0.0009477	26	214	26	402
928	0.0011495	11	221	27	431
929	0.0011216	10	203	24	396
930	0.0011194	25	237	28	449
931	0.0009085	28	209	24	390
932	0.0010498	63	250	26	437
933	0.0010729	11	216	26	421
934	0.0010182	5	196	24	387
935	0.001004	27	210	26	393
936	0.0008783	25	207	23	389
937	0.0011258	74	256	28	438
938	0.0010028	50	234	27	418
939	0.0011614	16	227	26	438
940	0.0010687	21	230	24	439
941	0.0009075	6	197	26	388
942	0.0011464	2	204	29	406
943	0.0009409	29	227	23	425
944	0.0011248	52	219	25	386
945	0.001287	18	245	29	472
946	0.0011419	65	251	25	437
947	0.0009346	28	237	27	446
948	0.0009563	12	206	23	400
949	0.0009126	72	249	26	426
950	0.000995	9	198	27	387
951	0.0010037	9	232	25	455
952	0.001034	37	221	28	405
953	0.0010946	33	226	28	419
954	0.0011706	51	238	27	425
955	0.0009208	24	210	28	396
956	0.0010009	67	258	25	449
957	0.0011165	107	250	27	393
958	0.0010848	21	224	25	427
959	0.001018	62	256	29	450
960	0.0010125	62	251	28	440
961	0.0011253	19	226	25	433
962	0.0010863	51	258	27	465
963	0.0009655	23	195	28	367
964	0.000943	39	216	29	393
965	0.0012891	13	236	28	459
966	0.0012979	145	299	21	453
967	0.001068	75	264	29	453
968	0.0010143	2	197	21	392
969	0.0010246	11	201	26	391
970	0.0010131	162	316	28	470
971	0.0009565	10	200	26	390
972	0.0009902	5	208	23	411
973	0.0010142	26	223	24	420
974	0.0010058	19	197	23	375
975	0.0011105	102	264	28	426
976	0.0009618	18	195	28	372
977	0.0009865	68	230	29	392
978	0.0009968	53	243	27	433
979	0.0009966	44	227	20	410
980	0.0009582	67	246	23	425
981	0.0011396	35	206	24	377
982	0.0009606	52	236	29	420
983	0.0010469	2	213	24	424
984	0.001087	28	231	24	434
985	0.0010059	55	233	25	411
986	0.0009601	104	239	29	374
987	0.0010925	50	265	27	480
988	0.001017	71	263	29	455
989	0.0010581	44	217	28	390
990	0.0013312	9	221	29	433
991	0.0010421	21	197	28	373
992	0.0010088	3	219	28	435
993	0.0010154	59	236	21	413
994	0.0010072	54	248	25	442
995	0.0011489	70	244	25	418
996	0.0009337	19	223	25	427
997	0.001075	74	250	26	426
998	0.0010165	30	230	28	430
999	0.0010318	12	205	28	398
mean	0.00103062	40.594	227.521	26.359	414.448

## Sheet: PowerBalance_SEq
	time	SEq	Bal	Reg	Egal
0	0.0006029	19	193	22	367
1	0.0007237	7	222	22	437
2	0.0007621	9	234	29	459
3	0.0007319	33	234	29	435
4	0.0005706	14	202	28	390
5	0.0005605	34	215	23	396
6	0.0005039	4	198	27	392
7	0.0005243	5	192	24	379
8	0.0005097	9	186	21	363
9	0.0006011	19	197	24	375
10	0.0005804	14	213	24	412
11	0.0007571	20	237	22	454
12	0.0008705	36	218	28	400
13	0.0007573	53	246	24	439
14	0.0006033	22	207	29	392
15	0.0008836	20	205	27	390
16	0.0006212	3	207	26	411
17	0.0008218	35	241	29	447
18	0.0006367	1	213	25	425
19	0.0005249	5	220	23	435
20	0.0007685	36	224	22	412
21	0.0007663	21	215	28	409
22	0.0006194	16	213	28	410
23	0.0007692	18	197	24	376
24	0.0007782	9	203	24	397
25	0.0005832	20	245	29	470
26	0.0007857	28	238	29	448
27	0.0007149	17	202	29	387
28	0.0007648	8	210	24	412
29	0.0006901	61	234	26	407
30	0.0007913	119	285	24	451
31	0.0007296	20	237	25	454
32	0.0007514	7	216	28	425
33	0.0005772	30	231	25	432
34	0.0007464	44	225	25	406
35	0.0006	3	189	25	375
36	0.0007066	41	207	29	373
37	0.0005882	5	236	28	467
38	0.0007463	91	240	24	389
39	0.0007275	20	207	24	394
40	0.0008038	8	215	24	422
41	0.0006713	10	216	29	422
42	0.0007435	31	218	27	405
43	0.0007375	28	221	29	414
44	0.0006727	38	231	24	424
45	0.0007525	69	238	27	407
46	0.0006539	14	222	23	430
47	0.0005345	7	216	29	425
48	0.0007905	8	189	27	370
49	0.0007175	17	216	28	415
50	0.0005852	31	226	23	421
51	0.0007145	67	243	29	419
52	0.0007366	19	231	29	443
53	0.0005797	13	220	24	427
54	0.0007338	25	215	27	405
55	0.0007423	51	227	27	403
56	0.0006448	8	229	26	450
57	0.0006115	2	198	21	394
58	0.000782	6	202	29	398
59	0.0007842	45	227	24	409
60	0.0005729	84	236	26	388
61	0.0007582	15	234	29	453
62	0.0008098	18	238	28	458
63	0.00064	11	217	23	423
64	0.0007484	10	194	25	378
65	0.0005419	4	235	29	466
66	0.0008879	26	237	24	448
67	0.0008548	88	237	22	386
68	0.0007517	46	225	28	404
69	0.0005888	24	194	23	364
70	0.0006015	34	216	23	398
71	0.0006406	1	195	27	389
72	0.0008232	27	234	27	441
73	0.0005738	10	214	29	418
74	0.0007494	24	217	23	410
75	0.0007569	31	238	27	445
76	0.0007735	15	244	26	473
77	0.0007615	46	205	25	364
78	0.0007563	14	202	27	390
79	0.0006214	20	207	27	394
80	0.0007682	5	237	25	469
81	0.0005221	32	215	27	398
82	0.0007354	109	262	28	415
83	0.0005753	69	255	27	441
84	0.0006817	11	214	22	417
85	0.0005182	2	202	27	402
86	0.0007493	19	208	28	397
87	0.0005096	3	238	25	473
88	0.0007366	21	201	27	381
89	0.0006054	10	205	24	400
90	0.0006345	30	238	24	446
91	0.0007538	14	202	23	390
92	0.0007649	116	298	28	480
93	0.0007562	44	227	26	410
94	0.0006719	9	225	29	441
95	0.0007299	10	222	29	434
96	0.0007598	23	208	24	393
97	0.0008116	53	236	28	419
98	0.000815	22	194	28	366
99	0.0005911	9	207	27	405
100	0.0007343	24	223	26	422
101	0.0007728	83	237	26	391
102	0.0005729	2	189	25	376
103	0.0008193	43	232	28	421
104	0.0007224	72	233	29	394
105	0.0008179	36	223	25	410
106	0.0007993	42	230	29	418
107	0.0007655	35	207	25	379
108	0.0008279	9	207	27	405
109	0.0006307	9	224	29	439
110	0.0006308	42	256	28	470
111	0.0007077	25	208	27	391
112	0.0005946	14	221	27	428
113	0.0007512	71	245	25	419
114	0.0007232	10	230	29	450
115	0.0007729	9	204	24	399
116	0.0008043	18	227	29	436
117	0.0007674	33	226	22	419
118	0.000731	15	195	25	375
119	0.0007542	36	246	29	456
120	0.0008064	49	242	29	435
121	0.0005694	78	242	26	406
122	0.0005825	6	203	24	400
123	0.0007636	39	241	24	443
124	0.0007474	34	251	28	468
125	0.0007472	12	218	25	424
126	0.0007399	22	204	27	386
127	0.0007682	40	249	25	458
128	0.0005175	40	209	27	378
129	0.0007368	13	221	29	429
130	0.0007539	16	232	28	448
131	0.0005153	2	196	27	390
132	0.0008249	4	184	24	364
133	0.0005983	25	223	27	421
134	0.0007715	51	205	27	359
135	0.0005987	15	197	20	379
136	0.0007405	13	225	26	437
137	0.0007951	85	244	26	403
138	0.0008267	17	235	25	453
139	0.0007295	20	200	27	380
140	0.0005876	21	198	23	375
141	0.0005134	5	207	24	409
142	0.0007393	21	215	29	409
143	0.0007377	11	209	28	407
144	0.0005536	19	223	24	427
145	0.0005461	16	198	25	380
146	0.0007886	13	220	27	427
147	0.0007265	25	227	28	429
148	0.0008563	15	206	25	397
149	0.0007629	6	248	26	490
150	0.0006299	21	199	25	377
151	0.0005632	2	209	26	416
152	0.000789	18	233	26	448
153	0.0005388	8	214	28	420
154	0.0007245	4	199	26	394
155	0.0006146	11	222	23	433
156	0.0005725	40	217	27	394
157	0.0006437	43	220	28	397
158	0.0008177	49	246	28	443
159	0.0006355	5	216	22	427
160	0.0007228	38	220	28	402
161	0.0007685	47	198	27	349
162	0.0007486	24	227	24	430
163	0.0007748	27	227	24	427
164	0.0007928	18	228	23	438
165	0.0007395	18	233	27	448
166	0.0007338	25	195	28	365
167	0.0008054	16	231	26	446
168	0.0005989	22	205	29	388
169	0.0005827	0	208	28	416
170	0.0006027	13	203	29	393
171	0.0006411	28	212	21	396
172	0.0008228	17	220	29	423
173	0.000616	11	209	28	407
174	0.0007566	23	230	29	437
175	0.0007173	16	219	27	422
176	0.0006864	43	240	27	437
177	0.0006253	3	220	27	437
178	0.0008257	15	218	26	421
179	0.0007016	4	208	24	412
180	0.0007237	13	229	26	445
181	0.0005811	47	215	24	383
182	0.0008563	78	270	28	462
183	0.0005799	5	237	26	469
184	0.0007965	23	201	25	379
185	0.0007829	25	253	29	481
186	0.0006264	28	221	28	414
187	0.0006216	26	234	25	442
188	0.0007345	30	197	26	364
189	0.0007428	36	186	27	336
190	0.000806	59	207	22	355
191	0.0007415	9	220	25	431
192	0.0007131	44	237	28	430
193	0.0005804	40	209	27	378
194	0.0006805	16	219	28	422
195	0.0005881	9	173	24	337
196	0.0007453	30	219	29	408
197	0.0007667	9	216	24	423
198	0.000607	19	216	26	413
199	0.0007569	7	223	28	439
200	0.0005411	5	202	26	399
201	0.0007341	15	226	27	437
202	0.0007759	26	236	29	446
203	0.0007168	11	212	29	413
204	0.0007124	56	230	28	404
205	0.000709	84	244	29	404
206	0.0007479	48	231	29	414
207	0.0007497	100	252	28	404
208	0.0006217	25	214	28	403
209	0.0005824	7	209	22	411
210	0.0006113	37	222	27	407
211	0.0005621	1	202	28	403
212	0.0007307	36	232	24	428
213	0.0005514	34	223	29	412
214	0.0006509	49	222	28	395
215	0.0008013	5	209	29	413
216	0.0007545	10	208	28	406
217	0.0005626	18	230	25	442
218	0.000743	48	241	26	434
219	0.0008187	43	265	29	487
220	0.0007916	40	233	26	426
221	0.0007119	22	210	28	398
222	0.0007025	28	203	22	378
223	0.0007521	60	219	28	378
224	0.0008313	46	239	29	432
225	0.0007936	57	220	29	383
226	0.0007264	20	200	28	380
227	0.0006035	1	213	24	425
228	0.00075	27	207	27	387
229	0.0007312	12	219	29	426
230	0.0007148	59	235	27	411
231	0.000741	16	222	29	428
232	0.0006047	10	197	23	384
233	0.0007704	3	217	29	431
234	0.0007105	43	231	28	419
235	0.0007597	26	237	23	448
236	0.0007462	20	233	29	446
237	0.0005693	32	222	25	412
238	0.000708	76	246	29	416
239	0.0005958	6	221	28	436
240	0.0007897	34	229	24	424
241	0.0007422	26	209	25	392
242	0.0007413	21	204	24	387
243	0.0007547	108	273	26	438
244	0.0005391	20	208	29	396
245	0.0007277	12	213	26	414
246	0.0007252	40	218	28	396
247	0.0007296	8	199	25	390
248	0.00073	17	210	28	403
249	0.0005683	4	201	26	398
250	0.0007686	67	218	23	369
251	0.0006146	16	221	24	426
252	0.0007692	25	223	25	421
253	0.0005484	0	202	25	404
254	0.0005165	3	184	28	365
255	0.0007126	85	221	23	357
256	0.0008336	51	242	27	433
257	0.0006051	1	215	27	429
258	0.0005774	64	231	29	398
259	0.0008095	13	224	27	435
260	0.0006073	5	197	27	389
261	0.0006549	6	209	25	412
262	0.0006586	30	229	27	428
263	0.0006295	9	203	24	397
264	0.0006328	51	241	26	431
265	0.0007582	9	239	29	469
266	0.0008016	38	227	27	416
267	0.0006042	13	190	25	367
268	0.0005846	43	218	24	393
269	0.0005168	2	204	23	406
270	0.0007393	31	211	28	391
271	0.0007351	6	191	25	376
272	0.0005962	22	203	19	384
273	0.0007838	36	243	28	450
274	0.0005523	11	205	23	399
275	0.0007796	58	242	28	426
276	0.0006044	27	214	28	401
277	0.0007496	13	215	26	417
278	0.0007626	20	215	28	410
279	0.0007766	21	220	27	419
280	0.0006519	56	238	25	420
281	0.0005932	24	188	29	352
282	0.0006729	1	224	28	447
283	0.0007254	25	214	27	403
284	0.0005766	3	213	29	423
285	0.0008303	74	246	26	418
286	0.0006021	53	239	28	425
287	0.0007502	7	217	27	427
288	0.0007347	36	200	28	364
289	0.0007659	14	185	26	356
290	0.0007491	21	240	27	459
291	0.0006444	6	216	25	426
292	0.0007883	56	247	25	438
293	0.0007411	20	221	28	422
294	0.0005882	13	209	26	405
295	0.0007985	16	241	29	466
296	0.0007482	15	200	29	385
297	0.0007599	25	227	27	429
298	0.0005898	4	223	25	442
299	0.0005873	19	215	24	411
300	0.0007773	15	213	26	411
301	0.0006227	16	220	28	424
302	0.0007225	64	237	21	410
303	0.0007375	19	222	29	425
304	0.0007381	18	223	29	428
305	0.0005628	10	218	28	426
306	0.0007937	66	262	27	458
307	0.0008023	22	247	25	472
308	0.0007762	3	208	24	413
309	0.0007548	18	229	26	440
310	0.0007195	95	261	26	427
311	0.0007064	26	236	28	446
312	0.0005907	11	202	23	393
313	0.0008049	11	231	24	451
314	0.0007847	27	205	29	383
315	0.0006157	43	199	29	355
316	0.0006178	3	215	23	427
317	0.0006055	30	229	28	428
318	0.0008307	51	226	22	401
319	0.0007474	123	266	27	409
320	0.0007624	51	252	24	453
321	0.0007312	15	210	28	405
322	0.0007453	24	233	29	442
323	0.0007213	80	245	26	410
324	0.0007615	36	257	29	478
325	0.0008918	32	207	25	382
326	0.0006403	7	198	19	389
327	0.0008028	8	204	24	400
328	0.0007677	11	201	26	391
329	0.0005697	21	200	19	379
330	0.0006428	65	241	24	417
331	0.0006524	9	243	29	477
332	0.0007968	89	248	26	407
333	0.0005778	4	198	25	392
334	0.0005536	3	211	24	419
335	0.0007621	7	225	29	443
336	0.0007199	22	196	24	370
337	0.0009432	38	233	25	428
338	0.0008307	41	247	26	453
339	0.0007656	14	190	28	366
340	0.0007587	78	253	24	428
341	0.0007849	23	229	29	435
342	0.0005613	13	194	24	375
343	0.0007523	25	221	29	417
344	0.0008027	17	245	28	473
345	0.0008234	24	252	26	480
346	0.0007986	7	202	27	397
347	0.0006518	2	198	24	394
348	0.0007619	18	227	23	436
349	0.0007098	31	210	25	389
350	0.0007229	66	243	27	420
351	0.0007399	42	236	29	430
352	0.0005472	41	216	27	391
353	0.000618	36	200	29	364
354	0.0007543	31	237	28	443
355	0.0005504	7	225	29	443
356	0.0007513	16	214	27	412
357	0.0005156	1	189	21	377
358	0.0006249	30	238	28	446
359	0.0005259	18	204	25	390
360	0.00061	60	221	24	382
361	0.0005422	15	208	25	401
362	0.0004925	3	182	25	361
363	0.0006205	22	234	25	446
364	0.0005266	14	208	29	402
365	0.000786	61	218	27	375
366	0.0008143	35	204	22	373
367	0.0007556	33	219	22	405
368	0.0006279	10	210	23	410
369	0.0007154	79	269	29	459
370	0.0007724	28	219	29	410
371	0.0007621	29	219	28	409
372	0.0007576	8	227	26	446
373	0.0005791	3	197	29	391
374	0.0007577	15	230	27	445
375	0.0007283	7	211	29	415
376	0.0008148	44	256	27	468
377	0.0004688	7	206	23	405
378	0.0006047	34	225	24	416
379	0.0006564	15	205	27	395
380	0.0007682	27	212	24	397
381	0.0008014	24	222	24	420
382	0.0007395	49	218	26	387
383	0.0007544	10	218	27	426
384	0.0007558	102	277	25	452
385	0.0007374	29	233	26	437
386	0.0009782	11	213	28	415
387	0.0006153	10	210	25	410
388	0.0007921	9	210	27	411
389	0.0006068	12	201	29	390
390	0.0007065	77	218	29	359
391	0.0006437	10	215	29	420
392	0.0007545	21	203	27	385
393	0.0007183	3	213	24	423
394	0.000651	86	223	29	360
395	0.0005487	50	206	28	362
396	0.0005293	6	212	29	418
397	0.0007581	18	220	27	422
398	0.0007571	24	214	28	404
399	0.0007388	18	227	29	436
400	0.0007888	20	213	25	406
401	0.0005553	3	183	29	363
402	0.0007852	13	209	23	405
403	0.000684	13	203	27	393
404	0.0007671	24	226	26	428
405	0.0006958	29	218	28	407
406	0.0007841	16	224	27	432
407	0.0006152	8	203	26	398
408	0.0005909	5	218	28	431
409	0.0007366	27	215	28	403
410	0.0006092	11	231	25	451
411	0.0007287	52	230	29	408
412	0.0005974	1	206	25	411
413	0.0007512	34	247	27	460
414	0.0007373	16	230	27	444
415	0.0006408	26	212	27	398
416	0.0005805	59	220	29	381
417	0.0007575	49	237	29	425
418	0.0007772	44	248	29	452
419	0.0005916	14	204	27	394
420	0.0005225	10	208	27	406
421	0.0007508	32	220	28	408
422	0.0006427	4	240	29	476
423	0.0004916	10	190	24	370
424	0.0006123	14	206	24	398
425	0.0007367	1	232	29	463
426	0.0007439	32	226	24	420
427	0.000594	13	191	28	369
428	0.0007198	9	207	26	405
429	0.0005752	42	236	29	430
430	0.0007708	14	215	28	416
431	0.0007259	11	232	29	453
432	0.0010363	2	226	24	450
433	0.0006159	25	234	23	443
434	0.0007662	47	234	27	421
435	0.0007464	65	243	29	421
436	0.0006965	66	248	27	430
437	0.0006371	8	221	24	434
438	0.0007584	14	211	29	408
439	0.00078	53	218	24	383
440	0.0006232	16	220	25	424
441	0.0006216	3	198	28	393
442	0.0007696	35	229	26	423
443	0.0007577	23	235	23	447
444	0.0008178	19	200	24	381
445	0.0007869	24	212	23	400
446	0.0008897	15	223	26	431
447	0.0008054	17	228	27	439
448	0.0005855	9	213	29	417
449	0.0007638	71	248	28	425
450	0.0007133	113	277	23	441
451	0.0006219	1	218	27	435
452	0.0007317	53	216	26	379
453	0.0005943	36	210	26	384
454	0.0005382	24	203	25	382
455	0.0005777	38	209	29	380
456	0.000724	50	233	27	416
457	0.0007733	22	217	26	412
458	0.000709	25	212	27	399
459	0.0006811	4	202	29	400
460	0.0006651	18	215	22	412
461	0.0007521	34	217	26	400
462	0.0005408	2	190	27	378
463	0.0007641	106	272	28	438
464	0.0007285	32	229	29	426
465	0.0007746	87	263	27	439
466	0.0005403	2	199	22	396
467	0.0007268	31	213	27	395
468	0.000801	4	210	25	416
469	0.0006454	39	209	27	379
470	0.0006062	27	214	27	401
471	0.0007872	36	225	28	414
472	0.0007445	10	234	29	458
473	0.000669	17	226	29	435
474	0.0007734	105	251	25	397
475	0.0007538	10	241	24	472
476	0.0006976	47	239	29	431
477	0.0007204	1	185	29	369
478	0.0007432	19	203	25	387
479	0.0007971	39	230	28	421
480	0.0007378	13	230	25	447
481	0.0007508	18	214	29	410
482	0.0005852	11	221	29	431
483	0.0007619	40	220	28	400
484	0.0006179	5	176	28	347
485	0.0005564	21	203	26	385
486	0.0005862	15	192	26	369
487	0.0007532	57	225	20	393
488	0.0007656	55	248	27	441
489	0.000578	12	214	26	416
490	0.0007432	118	268	24	418
491	0.0007645	4	232	27	460
492	0.0005626	10	208	29	406
493	0.0007596	27	245	27	463
494	0.0007808	27	232	25	437
495	0.0005703	1	210	26	419
496	0.000742	17	233	25	449
497	0.0006212	1	180	26	359
498	0.0007429	9	230	28	451
499	0.0007416	21	219	27	417
500	0.0005987	36	215	26	394
501	0.0006088	10	239	25	468
502	0.0007378	78	250	29	422
503	0.0007524	32	229	26	426
504	0.000619	1	210	29	419
505	0.0007945	20	208	23	396
506	0.000564	52	222	29	392
507	0.0007107	49	223	25	397
508	0.0007603	56	235	26	414
509	0.0007437	62	241	26	420
510	0.0007663	16	229	28	442
511	0.0007706	33	233	24	433
512	0.0007665	27	242	27	457
513	0.0005942	44	223	27	402
514	0.0007579	27	226	29	425
515	0.0005507	8	220	28	432
516	0.0007751	84	284	27	484
517	0.0006303	2	223	25	444
518	0.0007837	6	227	27	448
519	0.0007665	24	234	29	444
520	0.0007532	72	244	29	416
521	0.000657	25	242	28	459
522	0.0007563	35	217	28	399
523	0.0007339	11	223	28	435
524	0.0007421	44	216	26	388
525	0.0006399	0	203	26	406
526	0.0005748	4	187	28	370
527	0.0005129	7	206	29	405
528	0.0007206	75	261	29	447
529	0.0007022	11	198	26	385
530	0.0007019	83	223	26	363
531	0.0006679	1	210	23	419
532	0.0007711	51	221	28	391
533	0.0007586	40	220	26	400
534	0.0007584	68	219	29	370
535	0.0007917	39	214	24	389
536	0.0006038	22	202	29	382
537	0.0007753	45	247	27	449
538	0.0004697	10	175	24	340
539	0.0006553	2	217	29	432
540	0.0005871	2	206	25	410
541	0.0007469	78	256	27	434
542	0.000773	30	211	25	392
543	0.0007632	38	231	29	424
544	0.0007351	78	260	27	442
545	0.0006209	1	205	27	409
546	0.0008122	58	272	27	486
547	0.0007478	90	254	27	418
548	0.000758	1	219	27	437
549	0.0005819	1	212	27	423
550	0.0006212	12	187	26	362
551	0.0007367	37	213	24	389
552	0.0007298	29	206	28	383
553	0.0006347	19	207	23	395
554	0.0006328	12	204	29	396
555	0.0007761	26	247	25	468
556	0.0008239	118	276	28	434
557	0.0005955	4	201	27	398
558	0.0006925	6	230	26	454
559	0.0007592	57	222	26	387
560	0.0007753	27	220	24	413
561	0.000741	50	247	29	444
562	0.0007684	7	236	25	465
563	0.0005916	8	209	28	410
564	0.0006061	9	184	25	359
565	0.0007564	13	229	23	445
566	0.00063	2	206	27	410
567	0.0004994	9	192	22	375
568	0.0006913	0	201	28	402
569	0.0007215	42	234	28	426
570	0.0007378	27	211	27	395
571	0.0005721	12	202	26	392
572	0.0007111	59	240	29	421
573	0.0006421	19	200	26	381
574	0.0007507	21	204	25	387
575	0.0007777	27	243	28	459
576	0.0007932	22	219	26	416
577	0.0004947	1	162	25	323
578	0.0008009	26	236	29	446
579	0.0006259	20	200	26	380
580	0.0005205	9	215	27	421
581	0.0007596	17	216	27	415
582	0.0005932	29	222	22	415
583	0.0005424	30	218	25	406
584	0.0007694	37	251	24	465
585	0.0009296	9	202	28	395
586	0.0005529	18	204	22	390
587	0.0007546	34	239	27	444
588	0.0008523	170	280	28	390
589	0.0006049	3	211	26	419
590	0.0007579	19	202	29	385
591	0.000526	1	193	29	385
592	0.0008737	69	243	29	417
593	0.0007089	18	197	22	376
594	0.0007249	9	206	28	403
595	0.0007505	4	232	27	460
596	0.0006249	24	225	28	426
597	0.0004976	2	209	25	416
598	0.0008474	14	194	23	374
599	0.0007875	20	216	28	412
600	0.0007555	77	264	28	451
601	0.0007961	86	265	28	444
602	0.0005737	3	184	29	365
603	0.000584	2	201	23	400
604	0.000755	28	228	27	428
605	0.0006129	10	221	25	432
606	0.0007549	66	245	28	424
607	0.0005776	22	231	26	440
608	0.0007712	24	227	23	430
609	0.0005695	36	223	28	410
610	0.0007529	39	228	27	417
611	0.0006344	16	220	27	424
612	0.0007875	44	216	27	388
613	0.000732	43	221	23	399
614	0.0006576	3	214	27	425
615	0.0007369	51	249	27	447
616	0.0006937	69	224	29	379
617	0.0006061	8	223	27	438
618	0.000726	11	204	27	397
619	0.0005076	38	199	24	360
620	0.0007691	11	197	29	383
621	0.0007349	31	201	24	371
622	0.0007237	28	221	27	414
623	0.0005835	18	216	24	414
624	0.0005772	8	215	28	422
625	0.0007565	17	231	22	445
626	0.000716	31	220	28	409
627	0.000738	8	188	26	368
628	0.0007192	52	222	26	392
629	0.0007394	13	220	29	427
630	0.0007765	7	206	26	405
631	0.0007619	45	238	23	431
632	0.000769	17	210	24	403
633	0.000749	0	233	28	466
634	0.0007686	43	235	26	427
635	0.0007542	68	241	28	414
636	0.0007655	85	264	27	443
637	0.0007425	5	208	29	411
638	0.0007665	10	221	26	432
639	0.0007572	13	205	25	397
640	0.0006339	5	223	25	441
641	0.0007362	2	212	26	422
642	0.0006093	40	213	28	386
643	0.0006363	1	205	28	409
644	0.0007936	15	242	28	469
645	0.0005063	2	204	23	406
646	0.0005546	12	212	25	412
647	0.0005674	4	205	27	406
648	0.0007564	95	262	29	429
649	0.0007472	5	229	25	453
650	0.0007982	47	251	28	455
651	0.0005617	9	214	25	419
652	0.0007622	40	230	28	420
653	0.0007833	14	224	29	434
654	0.0007471	52	227	26	402
655	0.000595	4	224	29	444
656	0.0007797	25	224	27	423
657	0.000565	13	228	29	443
658	0.0006834	25	207	28	389
659	0.0005964	52	216	23	380
660	0.000792	5	206	28	407
661	0.0007456	35	219	22	403
662	0.0007585	11	200	27	389
663	0.0007345	7	206	27	405
664	0.000528	3	199	27	395
665	0.0007622	6	210	29	414
666	0.0006417	18	204	29	390
667	0.0006254	3	223	27	443
668	0.0007217	9	175	29	341
669	0.0005115	14	211	23	408
670	0.0006599	1	221	28	441
671	0.0007435	11	218	29	425
672	0.0007837	120	289	26	458
673	0.0007676	115	285	29	455
674	0.0007402	8	228	28	448
675	0.0007676	10	221	25	432
676	0.000603	25	232	25	439
677	0.0006303	11	203	28	395
678	0.0005263	17	193	27	369
679	0.0006078	12	207	22	402
680	0.0007443	37	217	26	397
681	0.0007511	10	203	28	396
682	0.0008001	1	225	25	449
683	0.0008098	23	196	23	369
684	0.0005648	43	213	29	383
685	0.0007917	21	201	28	381
686	0.0007783	11	211	28	411
687	0.0007365	10	214	26	418
688	0.0005214	5	198	26	391
689	0.0007889	26	221	26	416
690	0.0007384	55	241	29	427
691	0.0007395	10	191	25	372
692	0.0007314	74	263	28	452
693	0.0007246	30	207	29	384
694	0.0007357	50	234	29	418
695	0.0007533	9	233	26	457
696	0.0007974	37	242	28	447
697	0.0008575	17	224	29	431
698	0.0008164	10	217	28	424
699	0.0007599	30	217	29	404
700	0.0005786	6	230	27	454
701	0.0007358	7	212	26	417
702	0.0005276	13	210	25	407
703	0.0006995	4	194	29	384
704	0.0007566	10	203	27	396
705	0.0007242	58	207	27	356
706	0.000759	19	219	25	419
707	0.000734	10	225	28	440
708	0.0007642	59	238	24	417
709	0.0006429	12	212	27	412
710	0.0006578	1	221	27	441
711	0.00076	7	194	28	381
712	0.0007492	7	216	29	425
713	0.0008008	13	215	27	417
714	0.0005658	7	218	26	429
715	0.0006113	26	200	29	374
716	0.00074	39	219	29	399
717	0.0005669	1	179	22	357
718	0.0006493	13	213	29	413
719	0.0007279	12	188	27	364
720	0.000822	8	215	25	422
721	0.0005144	9	208	27	407
722	0.0006711	17	210	23	403
723	0.000649	4	215	26	426
724	0.000544	33	213	26	393
725	0.0007571	106	251	28	396
726	0.0007681	57	245	29	433
727	0.0008007	32	220	26	408
728	0.0005656	2	188	28	374
729	0.0005699	14	222	26	430
730	0.0005294	10	215	25	420
731	0.0006183	5	206	24	407
732	0.0006349	65	230	26	395
733	0.000625	58	226	28	394
734	0.0007147	5	208	27	411
735	0.0007719	46	251	27	456
736	0.000752	14	226	28	438
737	0.0005717	2	194	25	386
738	0.0005674	2	217	29	432
739	0.0005859	1	220	27	439
740	0.0006622	4	200	23	396
741	0.0005143	10	203	28	396
742	0.0007143	12	225	26	438
743	0.0005981	1	189	24	377
744	0.0007691	108	267	23	426
745	0.0007724	72	251	28	430
746	0.0006616	11	218	26	425
747	0.0007578	12	220	27	428
748	0.0007231	27	205	23	383
749	0.0007194	7	189	26	371
750	0.0007216	10	207	24	404
751	0.0006426	12	209	24	406
752	0.000752	14	220	24	426
753	0.0005936	7	198	27	389
754	0.0006109	0	207	24	414
755	0.0005993	44	238	27	432
756	0.0006428	1	184	23	367
757	0.000719	33	203	27	373
758	0.0007346	20	211	28	402
759	0.0005807	2	197	28	392
760	0.0006931	51	250	27	449
761	0.0007983	4	217	28	430
762	0.0006335	7	206	28	405
763	0.000577	21	230	27	439
764	0.0007355	6	216	25	426
765	0.000595	0	213	26	426
766	0.0007895	30	215	29	400
767	0.0007798	21	213	24	405
768	0.0007695	9	210	22	411
769	0.0008018	14	218	23	422
770	0.0006057	38	205	24	372
771	0.0006092	17	210	28	403
772	0.0005997	1	193	23	385
773	0.0007745	49	235	24	421
774	0.0007413	62	245	24	428
775	0.0007543	68	251	29	434
776	0.000922	15	228	29	441
777	0.0007721	9	206	25	403
778	0.0005944	0	206	28	412
779	0.0007248	83	252	22	421
780	0.0006989	58	230	26	402
781	0.0007216	63	230	24	397
782	0.0008482	70	247	28	424
783	0.0006199	5	228	25	451
784	0.0009178	58	227	29	396
785	0.000577	12	216	29	420
786	0.0006455	81	246	29	411
787	0.0005501	37	208	28	379
788	0.0005688	1	210	29	419
789	0.0007532	1	212	23	423
790	0.0007402	21	228	27	435
791	0.0007874	75	231	21	387
792	0.0006174	4	210	25	416
793	0.0005926	24	225	26	426
794	0.0006357	8	215	29	422
795	0.0007738	7	195	25	383
796	0.0009047	10	212	23	414
797	0.0005731	1	227	29	453
798	0.0006004	7	203	21	399
799	0.0007368	56	244	25	432
800	0.0008544	26	214	29	402
801	0.0006381	26	210	29	394
802	0.0006322	13	212	27	411
803	0.0007523	30	221	25	412
804	0.0007598	46	210	25	374
805	0.000749	8	214	27	420
806	0.0006514	35	215	27	395
807	0.000504	3	223	27	443
808	0.0007528	47	253	27	459
809	0.0006332	38	215	23	392
810	0.0007517	92	266	29	440
811	0.0005338	1	210	24	419
812	0.0008783	40	224	29	408
813	0.0007452	78	265	26	452
814	0.0006123	18	211	25	404
815	0.0004878	7	174	25	341
816	0.0008101	16	219	27	422
817	0.0007213	5	211	29	417
818	0.0008646	30	231	23	432
819	0.0006214	6	197	27	388
820	0.0006998	11	223	29	435
821	0.0007532	57	255	29	453
822	0.0007688	30	235	29	440
823	0.0007305	17	209	26	401
824	0.0007528	27	201	29	375
825	0.0006183	7	212	26	417
826	0.0008631	54	229	27	404
827	0.0005319	2	176	22	350
828	0.0005601	13	190	28	367
829	0.0007507	24	228	25	432
830	0.0007159	32	213	29	394
831	0.0005466	2	211	25	420
832	0.0006296	12	236	24	460
833	0.000739	44	214	29	384
834	0.0007616	31	240	29	449
835	0.000722	23	191	29	359
836	0.0007843	26	242	26	458
837	0.000552	13	214	24	415
838	0.0005136	24	206	24	388
839	0.0006321	48	233	28	418
840	0.0007321	97	256	29	415
841	0.0006092	23	206	22	389
842	0.0005715	4	241	27	478
843	0.0008051	21	246	27	471
844	0.0007817	20	207	24	394
845	0.0007301	17	220	25	423
846	0.000846	28	227	26	426
847	0.000738	19	215	29	411
848	0.0007377	49	223	20	397
849	0.0007466	13	218	27	423
850	0.0005214	5	194	26	383
851	0.0007943	13	201	28	389
852	0.0006438	7	217	29	427
853	0.0006131	7	226	27	445
854	0.0005536	6	199	26	392
855	0.0006129	52	213	26	374
856	0.0007903	91	283	28	475
857	0.0008736	27	226	26	425
858	0.0009	14	209	25	404
859	0.000762	91	262	28	433
860	0.0005278	9	200	29	391
861	0.0007323	9	208	23	407
862	0.000748	27	229	27	431
863	0.0007295	41	229	29	417
864	0.0007571	37	229	24	421
865	0.0007275	7	199	26	391
866	0.0006398	4	223	28	442
867	0.0005837	13	200	26	387
868	0.000748	16	221	29	426
869	0.0007386	42	238	27	434
870	0.0007614	85	259	25	433
871	0.000771	44	225	23	406
872	0.0005676	11	223	28	435
873	0.0007734	5	202	27	399
874	0.0005849	2	205	25	408
875	0.0006008	16	200	23	384
876	0.0009379	3	202	27	401
877	0.0005902	76	218	27	360
878	0.0005911	3	193	23	383
879	0.000754	83	268	29	453
880	0.0008628	14	215	23	416
881	0.0005447	8	200	29	392
882	0.0007378	81	237	25	393
883	0.0007551	30	216	27	402
884	0.0007435	5	216	27	427
885	0.0007735	29	220	22	411
886	0.00073	66	238	23	410
887	0.000748	19	226	21	433
888	0.0007503	8	223	29	438
889	0.0007429	30	223	29	416
890	0.0007189	79	227	23	375
891	0.0007072	7	194	28	381
892	0.0007311	11	190	27	369
893	0.0005979	12	224	23	436
894	0.0005676	5	214	23	423
895	0.0007446	10	242	28	474
896	0.0007358	20	217	22	414
897	0.0005264	7	225	25	443
898	0.0007622	31	212	26	393
899	0.00074	6	186	26	366
900	0.0007352	31	218	22	405
901	0.0008272	28	216	25	404
902	0.000747	38	213	28	388
903	0.0007411	57	242	27	427
904	0.0007678	20	211	28	402
905	0.0007448	16	213	28	410
906	0.0007333	22	223	25	424
907	0.0007281	34	221	25	408
908	0.0006103	48	220	23	392
909	0.00075	39	233	26	427
910	0.0005809	62	227	21	392
911	0.0009139	25	228	28	431
912	0.0007451	15	226	27	437
913	0.00077	9	218	26	427
914	0.0007048	19	222	29	425
915	0.0007203	8	231	29	454
916	0.0006073	63	243	27	423
917	0.0005837	11	202	27	393
918	0.0007277	43	223	28	403
919	0.0004943	1	200	21	399
920	0.0007477	35	199	24	363
921	0.0006527	1	199	27	397
922	0.0007516	47	232	25	417
923	0.0007758	12	218	23	424
924	0.0005833	0	206	28	412
925	0.0007522	12	201	26	390
926	0.0007606	92	267	29	442
927	0.0006068	1	203	26	405
928	0.0007419	11	221	27	431
929	0.0006437	10	203	24	396
930	0.0008253	27	231	28	435
931	0.0007365	20	220	27	420
932	0.0007572	15	223	29	431
933	0.0005611	11	216	26	421
934	0.0005443	5	196	24	387
935	0.0006312	27	210	26	393
936	0.000748	23	214	27	405
937	0.0007814	74	256	28	438
938	0.0007405	19	216	24	413
939	0.0007256	16	227	26	438
940	0.0007475	21	230	24	439
941	0.0009619	40	215	26	390
942	0.0005163	2	204	29	406
943	0.0007675	29	227	23	425
944	0.0008613	52	219	25	386
945	0.0007547	45	249	29	453
946	0.0006989	65	251	25	437
947	0.0007664	11	228	27	445
948	0.0006635	10	200	26	390
949	0.0006792	36	229	22	422
950	0.0006203	9	198	27	387
951	0.0007384	9	232	25	455
952	0.0006287	17	206	28	395
953	0.0008325	12	214	28	416
954	0.0005965	51	238	27	425
955	0.0005528	35	214	28	393
956	0.0007753	31	237	23	443
957	0.0007516	63	237	27	411
958	0.0005455	10	219	25	428
959	0.0007618	30	238	25	446
960	0.0006452	38	238	25	438
961	0.0006072	0	212	28	424
962	0.0007479	51	258	27	465
963	0.0006041	1	181	28	361
964	0.000756	39	216	29	393
965	0.0007534	10	230	28	450
966	0.0008438	145	299	21	453
967	0.0007505	75	264	29	453
968	0.0005954	2	197	21	392
969	0.0005413	11	201	26	391
970	0.0007888	162	316	28	470
971	0.0007496	10	200	26	390
972	0.0007945	5	208	23	411
973	0.0005953	26	223	24	420
974	0.0007865	19	197	23	375
975	0.0007316	81	260	28	439
976	0.0005844	18	195	28	372
977	0.0008942	17	200	29	383
978	0.0006247	32	232	27	432
979	0.0007578	44	227	20	410
980	0.0008247	15	224	24	433
981	0.0007354	35	206	24	377
982	0.0008049	20	204	23	388
983	0.0005703	2	213	24	424
984	0.0006363	28	231	24	434
985	0.0007756	55	233	25	411
986	0.0007684	104	239	29	374
987	0.000758	50	265	27	480
988	0.0007968	85	270	29	455
989	0.0008759	34	211	29	388
990	0.0007687	8	220	29	432
991	0.0007942	21	197	28	373
992	0.0007407	13	225	28	437
993	0.0005543	10	201	21	392
994	0.0006422	19	233	24	447
995	0.0005971	70	244	25	418
996	0.0007633	47	232	25	417
997	0.000746	74	250	26	426
998	0.0007408	18	233	28	448
999	0.0005436	12	205	28	398
mean	0.000698525	27.222	220.419	26.331	413.616

## Sheet: PowerBalance_Bal
	time	SEq	Bal	Reg	Egal
0	0.0005945	19	193	22	367
1	0.0007261	27	221	22	415
2	0.000791	9	234	29	459
3	0.0007482	33	234	29	435
4	0.0005943	14	202	28	390
5	0.0005935	34	215	23	396
6	0.0005297	4	198	27	392
7	0.0005528	5	192	24	379
8	0.0005152	9	186	21	363
9	0.0006026	19	197	24	375
10	0.0008155	14	213	24	412
11	0.0007406	20	237	22	454
12	0.0007618	36	218	28	400
13	0.0007534	53	246	24	439
14	0.0006079	22	207	29	392
15	0.0007925	20	205	27	390
16	0.0006418	3	207	26	411
17	0.0007432	35	241	29	447
18	0.0006023	1	213	25	425
19	0.0005155	5	220	23	435
20	0.0007688	36	224	22	412
21	0.0007578	21	215	28	409
22	0.0005359	16	213	28	410
23	0.0007262	18	197	24	376
24	0.0007725	9	203	24	397
25	0.0006411	20	245	29	470
26	0.0007695	44	234	27	424
27	0.0007223	17	202	29	387
28	0.0007684	8	210	24	412
29	0.0008087	61	234	26	407
30	0.0011037	119	285	24	451
31	0.0008216	20	237	25	454
32	0.0008208	7	216	28	425
33	0.0005328	30	231	25	432
34	0.0007685	44	225	25	406
35	0.0005676	3	189	25	375
36	0.000754	51	203	23	355
37	0.0005669	5	236	28	467
38	0.0007422	91	240	24	389
39	0.0007313	20	207	24	394
40	0.0007684	8	215	24	422
41	0.000603	10	216	29	422
42	0.0007397	31	218	27	405
43	0.0008192	28	221	29	414
44	0.0006168	38	231	24	424
45	0.0006998	69	238	27	407
46	0.0006115	14	222	23	430
47	0.000599	7	216	29	425
48	0.0007061	8	189	27	370
49	0.0008774	17	216	28	415
50	0.0005857	31	226	23	421
51	0.0007125	67	243	29	419
52	0.0007317	33	228	29	423
53	0.0005556	13	220	24	427
54	0.0008027	25	215	27	405
55	0.0007354	51	227	27	403
56	0.0006771	8	229	26	450
57	0.0006079	2	198	21	394
58	0.0007257	6	202	29	398
59	0.0007821	45	227	24	409
60	0.0005834	84	236	26	388
61	0.0007539	15	234	29	453
62	0.0007564	18	238	28	458
63	0.0006122	11	217	23	423
64	0.0007361	10	194	25	378
65	0.0006136	4	235	29	466
66	0.0007791	26	237	24	448
67	0.0007586	88	237	22	386
68	0.0007691	46	223	28	400
69	0.0006199	24	194	23	364
70	0.0006608	34	216	23	398
71	0.0006267	1	195	27	389
72	0.0008048	27	234	27	441
73	0.0005842	10	214	29	418
74	0.0008022	24	217	23	410
75	0.0007534	31	238	27	445
76	0.0007672	15	244	26	473
77	0.0008842	46	205	25	364
78	0.0007656	28	202	27	376
79	0.0007049	20	207	27	394
80	0.0009442	5	237	25	469
81	0.0005903	32	215	27	398
82	0.0007247	109	262	28	415
83	0.0005545	69	255	27	441
84	0.000694	11	214	22	417
85	0.0005013	2	202	27	402
86	0.0009132	19	208	28	397
87	0.000607	3	238	25	473
88	0.0007423	21	201	27	381
89	0.000589	10	205	24	400
90	0.0006184	30	238	24	446
91	0.000708	14	202	23	390
92	0.0007842	116	298	28	480
93	0.0007484	54	225	28	396
94	0.0006203	9	225	29	441
95	0.0007379	18	221	29	424
96	0.0007342	23	208	24	393
97	0.0007994	53	236	28	419
98	0.0008079	22	194	28	366
99	0.0006147	9	207	27	405
100	0.0007401	35	216	27	397
101	0.000749	83	237	26	391
102	0.0005403	2	189	25	376
103	0.0006019	43	232	28	421
104	0.0007578	72	233	29	394
105	0.0007447	36	223	25	410
106	0.0007638	42	230	29	418
107	0.0007587	35	207	25	379
108	0.0007461	9	207	27	405
109	0.0005669	9	224	29	439
110	0.0006273	42	256	28	470
111	0.0007088	25	208	27	391
112	0.0005781	14	221	27	428
113	0.000774	71	245	25	419
114	0.0007427	10	230	29	450
115	0.0007861	9	204	24	399
116	0.0007534	18	227	29	436
117	0.0007746	33	226	22	419
118	0.0007337	15	195	25	375
119	0.0007888	36	246	29	456
120	0.0007384	49	242	29	435
121	0.0005856	78	242	26	406
122	0.0006107	6	203	24	400
123	0.0007248	39	241	24	443
124	0.0008336	41	242	27	443
125	0.0007446	12	218	25	424
126	0.0007336	22	204	27	386
127	0.000808	40	249	25	458
128	0.000572	40	209	27	378
129	0.0007579	13	221	29	429
130	0.0007992	16	232	28	448
131	0.0005247	2	196	27	390
132	0.0007368	4	184	24	364
133	0.000666	25	223	27	421
134	0.0007403	51	205	27	359
135	0.0006548	15	197	20	379
136	0.0007309	13	225	26	437
137	0.000754	85	244	26	403
138	0.0007691	19	234	25	449
139	0.0007228	20	200	27	380
140	0.0007683	21	198	23	375
141	0.0005135	5	207	24	409
142	0.0007673	33	211	24	389
143	0.0007189	11	209	28	407
144	0.0006262	19	223	24	427
145	0.0006353	16	198	25	380
146	0.000744	13	220	27	427
147	0.0007224	25	227	28	429
148	0.0007551	15	206	25	397
149	0.000761	6	248	26	490
150	0.0006477	21	199	25	377
151	0.0005255	2	209	26	416
152	0.0008011	18	233	26	448
153	0.0005335	8	214	28	420
154	0.0007246	4	199	26	394
155	0.0006201	11	222	23	433
156	0.0007203	40	217	27	394
157	0.0007249	43	220	28	397
158	0.0007457	49	246	28	443
159	0.0006731	5	216	22	427
160	0.0007465	38	220	28	402
161	0.0008348	47	198	27	349
162	0.0007912	24	227	24	430
163	0.0007523	27	227	24	427
164	0.0007464	38	222	23	406
165	0.0007931	18	233	27	448
166	0.000719	25	195	28	365
167	0.0007809	16	231	26	446
168	0.0006019	22	205	29	388
169	0.0005676	0	208	28	416
170	0.0006	13	203	29	393
171	0.0006528	28	212	21	396
172	0.000764	17	220	29	423
173	0.0006232	11	209	28	407
174	0.0007407	23	230	29	437
175	0.0007283	16	219	27	422
176	0.0006341	43	240	27	437
177	0.0006404	3	220	27	437
178	0.0007842	15	218	26	421
179	0.0006261	4	208	24	412
180	0.0008062	13	229	26	445
181	0.0006034	47	215	24	383
182	0.0008036	78	270	28	462
183	0.0006051	5	237	26	469
184	0.0008606	23	201	25	379
185	0.0007808	25	253	29	481
186	0.0006426	28	221	28	414
187	0.0006415	26	234	25	442
188	0.000758	30	197	26	364
189	0.0007642	36	186	27	336
190	0.0007612	59	207	22	355
191	0.0007867	9	220	25	431
192	0.0008706	44	237	28	430
193	0.0006088	40	209	27	378
194	0.0006531	16	219	28	422
195	0.0005966	9	173	24	337
196	0.0007666	30	219	29	408
197	0.0007576	9	216	24	423
198	0.0006166	19	216	26	413
199	0.0007522	7	223	28	439
200	0.000533	5	202	26	399
201	0.0007492	15	226	27	437
202	0.0008179	26	236	29	446
203	0.0007423	11	212	29	413
204	0.0008244	56	230	28	404
205	0.0008601	84	244	29	404
206	0.0007205	48	231	29	414
207	0.0007835	100	252	28	404
208	0.0006729	25	214	28	403
209	0.0006101	7	209	22	411
210	0.0006053	37	222	27	407
211	0.0005313	1	202	28	403
212	0.0007279	36	232	24	428
213	0.0005393	34	223	29	412
214	0.0006786	49	222	28	395
215	0.0007137	5	209	29	413
216	0.0007599	10	208	28	406
217	0.0005788	18	230	25	442
218	0.0007517	48	241	26	434
219	0.0007558	43	265	29	487
220	0.0007652	40	233	26	426
221	0.0007045	22	210	28	398
222	0.0006073	28	203	22	378
223	0.000563	60	219	28	378
224	0.0008393	46	239	29	432
225	0.0007386	57	220	29	383
226	0.0007185	20	200	28	380
227	0.0005845	1	213	24	425
228	0.0007364	27	207	27	387
229	0.0007422	47	230	22	413
230	0.0007002	59	235	27	411
231	0.0006487	16	222	29	428
232	0.0006101	10	197	23	384
233	0.0007371	3	217	29	431
234	0.0007468	43	231	28	419
235	0.0007635	26	237	23	448
236	0.0008101	20	233	29	446
237	0.0005611	32	222	25	412
238	0.0007162	76	246	29	416
239	0.0006596	6	221	28	436
240	0.0007492	34	229	24	424
241	0.0007385	26	209	25	392
242	0.0007278	21	204	24	387
243	0.0008186	108	273	26	438
244	0.0005965	20	208	29	396
245	0.0007456	12	213	26	414
246	0.0007338	40	218	28	396
247	0.0007312	8	199	25	390
248	0.0007693	17	210	28	403
249	0.0005681	4	201	26	398
250	0.0007615	67	218	23	369
251	0.0006124	16	221	24	426
252	0.0007182	25	223	25	421
253	0.0005257	0	202	25	404
254	0.0005159	3	184	28	365
255	0.0007328	85	221	23	357
256	0.0007525	51	242	27	433
257	0.0005732	1	215	27	429
258	0.0005969	64	231	29	398
259	0.0007504	13	224	27	435
260	0.0006008	5	197	27	389
261	0.0006357	6	209	25	412
262	0.0006125	30	229	27	428
263	0.000638	9	203	24	397
264	0.0006883	51	241	26	431
265	0.0007426	9	239	29	469
266	0.0007241	38	227	27	416
267	0.0005645	13	190	25	367
268	0.0005914	43	218	24	393
269	0.0005226	2	204	23	406
270	0.0007418	31	211	28	391
271	0.0007158	6	191	25	376
272	0.0006234	22	203	19	384
273	0.000772	36	243	28	450
274	0.0005772	11	205	23	399
275	0.0007531	58	242	28	426
276	0.0005942	27	214	28	401
277	0.0007946	13	215	26	417
278	0.0007624	20	215	28	410
279	0.0007513	22	216	24	410
280	0.0006515	56	238	25	420
281	0.0005623	24	188	29	352
282	0.0005932	1	224	28	447
283	0.0007187	25	214	27	403
284	0.0005983	3	213	29	423
285	0.0008191	74	246	26	418
286	0.0005915	53	239	28	425
287	0.0007628	7	217	27	427
288	0.0007325	36	200	28	364
289	0.0006113	14	185	26	356
290	0.0007481	22	240	28	458
291	0.000679	6	216	25	426
292	0.0007847	56	247	25	438
293	0.0007263	20	221	28	422
294	0.0005738	13	209	26	405
295	0.0007489	18	231	28	444
296	0.0007788	15	200	29	385
297	0.0007817	25	227	27	429
298	0.0006373	4	223	25	442
299	0.0005731	19	215	24	411
300	0.000744	15	213	26	411
301	0.0006051	16	220	28	424
302	0.0007312	64	237	21	410
303	0.0007527	19	222	29	425
304	0.0007116	18	223	29	428
305	0.0005101	10	218	28	426
306	0.0008612	66	262	27	458
307	0.0007762	22	247	25	472
308	0.0007392	3	208	24	413
309	0.0007573	18	229	26	440
310	0.0007171	95	261	26	427
311	0.0005556	26	236	28	446
312	0.0005602	11	202	23	393
313	0.000766	11	231	24	451
314	0.0007292	27	205	29	383
315	0.0005853	43	199	29	355
316	0.0006877	3	215	23	427
317	0.0006637	30	229	28	428
318	0.0007521	51	226	22	401
319	0.0007563	123	266	27	409
320	0.0007664	51	252	24	453
321	0.0007282	15	210	28	405
322	0.0013114	24	233	29	442
323	0.0007026	80	245	26	410
324	0.0007769	36	257	29	478
325	0.0007203	32	207	25	382
326	0.0006429	7	198	19	389
327	0.0009087	8	204	24	400
328	0.00074	11	201	26	391
329	0.0005767	21	200	19	379
330	0.0007084	65	241	24	417
331	0.0007579	9	243	29	477
332	0.0007547	89	248	26	407
333	0.0006631	4	198	25	392
334	0.0005738	3	211	24	419
335	0.0007676	7	225	29	443
336	0.0007224	22	196	24	370
337	0.0007225	38	233	25	428
338	0.0007654	41	247	26	453
339	0.0007153	14	190	28	366
340	0.0008034	78	253	24	428
341	0.0007976	23	229	29	435
342	0.0005845	13	194	24	375
343	0.000924	25	221	29	417
344	0.000765	24	244	29	464
345	0.0007569	24	252	26	480
346	0.0007403	7	202	27	397
347	0.0006582	2	198	24	394
348	0.0008623	18	227	23	436
349	0.0006859	31	210	25	389
350	0.0007523	66	243	27	420
351	0.0007183	42	236	29	430
352	0.0005543	41	216	27	391
353	0.0006057	36	200	29	364
354	0.000752	31	237	28	443
355	0.0005813	7	225	29	443
356	0.0007553	16	214	27	412
357	0.0005131	1	189	21	377
358	0.000608	30	238	28	446
359	0.0005258	18	204	25	390
360	0.0005997	60	221	24	382
361	0.0005535	15	208	25	401
362	0.0005005	3	182	25	361
363	0.0006255	22	234	25	446
364	0.0005515	14	208	29	402
365	0.0007362	61	218	27	375
366	0.0008297	35	204	22	373
367	0.0007611	33	219	22	405
368	0.0006286	10	210	23	410
369	0.000954	79	269	29	459
370	0.0007264	28	219	29	410
371	0.0008011	29	219	28	409
372	0.0007763	8	227	26	446
373	0.0005569	3	197	29	391
374	0.0007455	15	230	27	445
375	0.0008136	7	211	29	415
376	0.0007918	44	256	27	468
377	0.0004863	7	206	23	405
378	0.0006247	34	225	24	416
379	0.0006125	15	205	27	395
380	0.0007755	27	212	24	397
381	0.0007924	24	222	24	420
382	0.0007404	49	218	26	387
383	0.0007558	10	218	27	426
384	0.0007225	102	277	25	452
385	0.0007394	29	233	26	437
386	0.000794	11	213	28	415
387	0.0005925	10	210	25	410
388	0.0006958	9	210	27	411
389	0.0005882	12	201	29	390
390	0.0007163	77	218	29	359
391	0.0006116	10	215	29	420
392	0.0007265	21	203	27	385
393	0.0007238	3	213	24	423
394	0.0006293	86	223	29	360
395	0.0005357	50	206	28	362
396	0.0005566	6	212	29	418
397	0.0007517	40	216	27	392
398	0.0007593	24	214	28	404
399	0.0009136	18	227	29	436
400	0.0007418	20	213	25	406
401	0.0005326	3	183	29	363
402	0.000762	13	209	23	405
403	0.0006139	13	203	27	393
404	0.0007297	24	226	26	428
405	0.0007484	29	218	28	407
406	0.0008395	16	224	27	432
407	0.0007411	8	203	26	398
408	0.0006623	5	218	28	431
409	0.0007497	27	215	28	403
410	0.0006171	11	231	25	451
411	0.0007092	52	230	29	408
412	0.0006018	1	206	25	411
413	0.0007594	34	247	27	460
414	0.0007842	16	230	27	444
415	0.0006982	26	212	27	398
416	0.0005811	59	220	29	381
417	0.0007424	49	237	29	425
418	0.0007667	44	248	29	452
419	0.0005976	14	204	27	394
420	0.0005342	10	208	27	406
421	0.0007225	32	220	28	408
422	0.000622	4	240	29	476
423	0.0004789	10	190	24	370
424	0.0006141	14	206	24	398
425	0.0007418	1	232	29	463
426	0.0009099	32	226	24	420
427	0.0006859	13	191	28	369
428	0.0008042	9	207	26	405
429	0.0006303	42	236	29	430
430	0.0008517	14	215	28	416
431	0.0007149	12	230	29	448
432	0.0007399	2	226	24	450
433	0.000612	25	234	23	443
434	0.0007712	47	234	27	421
435	0.0007418	18	224	27	430
436	0.0007255	66	248	27	430
437	0.0006777	8	221	24	434
438	0.0008064	14	211	29	408
439	0.0007623	53	218	24	383
440	0.0005749	16	220	25	424
441	0.0005531	3	198	28	393
442	0.0008257	35	229	26	423
443	0.0007483	23	235	23	447
444	0.0007407	19	200	24	381
445	0.0007997	24	212	23	400
446	0.0007514	15	223	26	431
447	0.0007976	31	227	27	423
448	0.0005679	9	213	29	417
449	0.0007597	71	248	28	425
450	0.0007387	113	277	23	441
451	0.0006329	1	218	27	435
452	0.0007338	53	216	26	379
453	0.0005924	36	210	26	384
454	0.0005264	24	203	25	382
455	0.0006455	38	209	29	380
456	0.0007318	50	233	27	416
457	0.0007724	22	217	26	412
458	0.0007528	25	212	27	399
459	0.0006163	4	202	29	400
460	0.0006956	18	215	22	412
461	0.0007767	34	217	26	400
462	0.0005354	2	190	27	378
463	0.0007516	106	272	28	438
464	0.0007444	32	229	29	426
465	0.0007502	87	263	27	439
466	0.0004892	2	199	22	396
467	0.0007377	31	213	27	395
468	0.0008179	4	210	25	416
469	0.0005951	39	209	27	379
470	0.0005934	27	214	27	401
471	0.0007478	45	222	28	399
472	0.0007572	10	234	29	458
473	0.0008757	17	226	29	435
474	0.000732	105	251	25	397
475	0.0007513	17	239	26	461
476	0.000575	47	239	29	431
477	0.0007097	1	185	29	369
478	0.0007306	19	203	25	387
479	0.0007572	39	230	28	421
480	0.0007211	14	221	25	428
481	0.0007642	18	214	29	410
482	0.0005863	11	221	29	431
483	0.0007234	40	220	28	400
484	0.0006416	5	176	28	347
485	0.000573	21	203	26	385
486	0.000593	15	192	26	369
487	0.0007423	57	225	20	393
488	0.0007661	55	248	27	441
489	0.0005843	12	214	26	416
490	0.0007566	118	268	24	418
491	0.0007624	4	232	27	460
492	0.0005501	10	208	29	406
493	0.0007868	27	245	27	463
494	0.0007768	27	232	25	437
495	0.0005859	1	210	26	419
496	0.0007499	17	233	25	449
497	0.0006334	1	180	26	359
498	0.0007716	9	230	28	451
499	0.0007502	21	219	27	417
500	0.000586	36	215	26	394
501	0.0005957	10	239	25	468
502	0.0006922	78	250	29	422
503	0.0007817	32	229	26	426
504	0.0006043	1	210	29	419
505	0.0007246	20	208	23	396
506	0.0005765	52	222	29	392
507	0.0007936	49	223	25	397
508	0.0007385	56	235	26	414
509	0.0007387	62	241	26	420
510	0.0007607	16	229	28	442
511	0.000822	33	233	24	433
512	0.0007256	27	242	27	457
513	0.0006183	44	223	27	402
514	0.0007691	27	226	29	425
515	0.0005462	8	220	28	432
516	0.0007456	84	284	27	484
517	0.0006591	2	223	25	444
518	0.0007546	6	227	27	448
519	0.0007275	26	233	26	440
520	0.0008235	72	244	29	416
521	0.0006528	25	242	28	459
522	0.0007442	35	217	28	399
523	0.0007833	11	223	28	435
524	0.0008437	44	216	26	388
525	0.0005928	0	203	26	406
526	0.0005748	4	187	28	370
527	0.0005132	7	206	29	405
528	0.000731	75	261	29	447
529	0.0006311	11	198	26	385
530	0.0007025	83	223	26	363
531	0.00081	1	210	23	419
532	0.0007359	51	221	28	391
533	0.0007418	40	220	26	400
534	0.0007339	68	219	29	370
535	0.0007593	39	214	24	389
536	0.0006364	22	202	29	382
537	0.0007163	45	247	27	449
538	0.0004709	10	175	24	340
539	0.0006216	2	217	29	432
540	0.0005626	2	206	25	410
541	0.0008039	78	256	27	434
542	0.0009259	30	211	25	392
543	0.0007911	38	231	29	424
544	0.0007971	78	260	27	442
545	0.0006863	1	205	27	409
546	0.0007761	58	272	27	486
547	0.0007547	90	254	27	418
548	0.0007428	1	219	27	437
549	0.0005546	1	212	27	423
550	0.0006049	12	187	26	362
551	0.0008146	37	213	24	389
552	0.000727	29	206	28	383
553	0.0005818	19	207	23	395
554	0.000553	12	204	29	396
555	0.00077	26	247	25	468
556	0.0007911	118	276	28	434
557	0.0005972	4	201	27	398
558	0.0007559	6	230	26	454
559	0.0007479	57	222	26	387
560	0.0007585	27	220	24	413
561	0.0007474	50	247	29	444
562	0.00077	7	236	25	465
563	0.000579	8	209	28	410
564	0.0006021	9	184	25	359
565	0.0007563	13	229	23	445
566	0.0006199	2	206	27	410
567	0.0004915	9	192	22	375
568	0.0005871	0	201	28	402
569	0.0007224	42	234	28	426
570	0.0008164	27	211	27	395
571	0.0005768	12	202	26	392
572	0.0007084	59	240	29	421
573	0.0007629	19	200	26	381
574	0.0007771	21	204	25	387
575	0.0007755	27	243	28	459
576	0.0007374	22	219	26	416
577	0.0004832	1	162	25	323
578	0.0007622	26	236	29	446
579	0.0006448	20	200	26	380
580	0.0005234	9	215	27	421
581	0.0007425	17	216	27	415
582	0.0006173	29	222	22	415
583	0.0005509	30	218	25	406
584	0.0008209	37	251	24	465
585	0.0006284	9	202	28	395
586	0.0005812	18	204	22	390
587	0.0007581	34	239	27	444
588	0.0007611	170	280	28	390
589	0.0006418	3	211	26	419
590	0.0007377	19	202	29	385
591	0.0005189	1	193	29	385
592	0.0007877	69	243	29	417
593	0.0007124	18	197	22	376
594	0.0007241	9	206	28	403
595	0.0007723	35	250	27	465
596	0.0005955	24	225	28	426
597	0.0005689	2	209	25	416
598	0.0007314	14	194	23	374
599	0.0008146	20	216	28	412
600	0.000758	77	264	28	451
601	0.0007696	86	265	28	444
602	0.0005793	3	184	29	365
603	0.0006201	2	201	23	400
604	0.0007887	28	228	27	428
605	0.0007822	10	221	25	432
606	0.0008353	66	245	28	424
607	0.0005872	22	231	26	440
608	0.0008188	24	227	23	430
609	0.0005804	36	223	28	410
610	0.0007605	1	209	27	417
611	0.0006437	16	220	27	424
612	0.0007882	44	216	27	388
613	0.0007687	43	221	23	399
614	0.0007126	3	214	27	425
615	0.0006988	51	249	27	447
616	0.0007804	69	224	29	379
617	0.0005822	8	223	27	438
618	0.0007721	11	204	27	397
619	0.0007547	38	199	24	360
620	0.0006607	11	197	29	383
621	0.0007284	31	201	24	371
622	0.000708	28	221	27	414
623	0.0005774	18	216	24	414
624	0.0005834	8	215	28	422
625	0.0007528	17	231	22	445
626	0.0007197	31	220	28	409
627	0.0007139	8	188	26	368
628	0.000832	52	222	26	392
629	0.0007403	13	220	29	427
630	0.0007593	7	206	26	405
631	0.000743	45	238	23	431
632	0.0007724	17	210	24	403
633	0.000744	0	233	28	466
634	0.0007966	43	235	26	427
635	0.0007155	68	241	28	414
636	0.0007662	85	264	27	443
637	0.0007694	5	208	29	411
638	0.0007411	17	219	26	421
639	0.0007702	13	205	25	397
640	0.0006142	5	223	25	441
641	0.0007703	2	212	26	422
642	0.0005912	40	213	28	386
643	0.0006159	1	205	28	409
644	0.0007451	15	242	28	469
645	0.000529	2	204	23	406
646	0.0005574	12	212	25	412
647	0.0005755	4	205	27	406
648	0.0007426	95	262	29	429
649	0.000739	5	229	25	453
650	0.0007872	47	251	28	455
651	0.0005451	9	214	25	419
652	0.0007283	40	230	28	420
653	0.0007513	14	224	29	434
654	0.0007829	52	227	26	402
655	0.0006052	4	224	29	444
656	0.000711	25	224	27	423
657	0.0005572	13	228	29	443
658	0.0006196	25	207	28	389
659	0.0006473	52	216	23	380
660	0.0007485	5	206	28	407
661	0.0007508	35	219	22	403
662	0.0007334	11	200	27	389
663	0.0007503	7	206	27	405
664	0.0005657	3	199	27	395
665	0.0007624	6	210	29	414
666	0.000633	18	204	29	390
667	0.000636	3	223	27	443
668	0.0007267	12	174	29	336
669	0.0005411	14	211	23	408
670	0.0006444	1	221	28	441
671	0.0007636	11	218	29	425
672	0.0007873	120	289	26	458
673	0.0007621	115	285	29	455
674	0.0008915	25	225	28	425
675	0.0007415	10	221	25	432
676	0.0007108	25	232	25	439
677	0.0006577	11	203	28	395
678	0.0005745	17	193	27	369
679	0.0006186	12	207	22	402
680	0.0007461	37	217	26	397
681	0.0008107	10	203	28	396
682	0.0007389	1	225	25	449
683	0.000731	23	196	23	369
684	0.0005756	43	213	29	383
685	0.0007263	21	201	28	381
686	0.0007716	11	211	28	411
687	0.0007612	10	214	26	418
688	0.0004975	5	198	26	391
689	0.0007696	26	221	26	416
690	0.0007335	55	241	29	427
691	0.0007267	10	191	25	372
692	0.0007608	74	263	28	452
693	0.0007365	30	207	29	384
694	0.000723	50	234	29	418
695	0.0007897	9	233	26	457
696	0.0007642	37	242	28	447
697	0.000755	21	222	29	423
698	0.0007172	10	217	28	424
699	0.0007643	30	217	29	404
700	0.0005723	6	230	27	454
701	0.0007558	7	212	26	417
702	0.0005141	13	210	25	407
703	0.0006133	4	194	29	384
704	0.000747	10	203	27	396
705	0.0007525	58	207	27	356
706	0.0007489	19	219	25	419
707	0.000727	10	225	28	440
708	0.0008046	59	238	24	417
709	0.0007751	12	212	27	412
710	0.0006509	1	221	27	441
711	0.000718	7	194	28	381
712	0.0007651	7	216	29	425
713	0.0007213	13	215	27	417
714	0.0005696	7	218	26	429
715	0.0006475	26	200	29	374
716	0.0007477	39	219	29	399
717	0.0005138	1	179	22	357
718	0.0007025	13	213	29	413
719	0.0007821	12	188	27	364
720	0.0007609	8	215	25	422
721	0.0005225	9	208	27	407
722	0.0006396	17	210	23	403
723	0.0005785	4	215	26	426
724	0.0006125	33	213	26	393
725	0.0007441	106	251	28	396
726	0.0007691	57	245	29	433
727	0.0007377	32	220	26	408
728	0.0005284	2	188	28	374
729	0.0006144	14	222	26	430
730	0.0005819	10	215	25	420
731	0.0005944	5	206	24	407
732	0.0006076	65	230	26	395
733	0.0005611	58	226	28	394
734	0.0007492	5	208	27	411
735	0.0007388	46	251	27	456
736	0.0009443	14	226	28	438
737	0.0005645	2	194	25	386
738	0.0005912	2	217	29	432
739	0.0005792	1	220	27	439
740	0.0006025	4	200	23	396
741	0.0005958	10	203	28	396
742	0.0007499	20	222	23	424
743	0.0005811	1	189	24	377
744	0.0007783	108	267	23	426
745	0.0007392	72	251	28	430
746	0.000647	11	218	26	425
747	0.0007696	12	220	27	428
748	0.0007176	27	205	23	383
749	0.0007413	27	188	24	349
750	0.0007182	10	207	24	404
751	0.0005689	12	209	24	406
752	0.0007559	14	220	24	426
753	0.00057	7	198	27	389
754	0.0005615	0	207	24	414
755	0.0006087	44	238	27	432
756	0.0006146	1	184	23	367
757	0.0007204	33	203	27	373
758	0.0007697	20	211	28	402
759	0.0006265	2	197	28	392
760	0.0006958	51	250	27	449
761	0.0007865	4	217	28	430
762	0.0006399	7	206	28	405
763	0.0005665	21	230	27	439
764	0.0007281	6	216	25	426
765	0.0006133	0	213	26	426
766	0.0007259	30	215	29	400
767	0.0007574	21	213	24	405
768	0.000783	9	210	22	411
769	0.0007323	14	218	23	422
770	0.0006004	38	205	24	372
771	0.000635	17	210	28	403
772	0.0006149	1	193	23	385
773	0.000729	49	235	24	421
774	0.0006097	62	245	24	428
775	0.0007571	68	251	29	434
776	0.0007628	15	228	29	441
777	0.000818	9	206	25	403
778	0.0005673	0	206	28	412
779	0.0007142	83	252	22	421
780	0.0007138	58	230	26	402
781	0.0007306	63	230	24	397
782	0.0007473	70	247	28	424
783	0.0006804	5	228	25	451
784	0.0007546	58	227	29	396
785	0.0005411	12	216	29	420
786	0.0006898	81	246	29	411
787	0.0005217	37	208	28	379
788	0.0005427	1	210	29	419
789	0.0006681	1	212	23	423
790	0.0007512	21	228	27	435
791	0.0007603	75	231	21	387
792	0.0006057	4	210	25	416
793	0.0005723	24	225	26	426
794	0.0006463	8	215	29	422
795	0.0005614	7	195	25	383
796	0.0007359	21	211	23	401
797	0.0005714	1	227	29	453
798	0.0006096	7	203	21	399
799	0.0007556	56	244	25	432
800	0.0007715	27	208	25	389
801	0.0006101	26	210	29	394
802	0.0005555	13	212	27	411
803	0.0008059	30	221	25	412
804	0.0007498	46	210	25	374
805	0.0007548	8	214	27	420
806	0.000638	35	215	27	395
807	0.000556	3	223	27	443
808	0.00082	47	253	27	459
809	0.0005429	38	215	23	392
810	0.0007764	92	266	29	440
811	0.0005253	1	210	24	419
812	0.0007313	40	224	29	408
813	0.0007431	78	265	26	452
814	0.0005676	18	211	25	404
815	0.000503	7	174	25	341
816	0.0007601	16	219	27	422
817	0.0007529	5	211	29	417
818	0.000777	30	231	23	432
819	0.0006037	6	197	27	388
820	0.0007259	11	223	29	435
821	0.0007278	57	255	29	453
822	0.0007302	30	235	29	440
823	0.000783	17	209	26	401
824	0.0007126	27	201	29	375
825	0.0005934	7	212	26	417
826	0.0007568	54	229	27	404
827	0.0005455	2	176	22	350
828	0.0005331	13	190	28	367
829	0.0007438	24	228	25	432
830	0.0005958	32	213	29	394
831	0.0005687	2	211	25	420
832	0.0006752	12	236	24	460
833	0.0008476	44	214	29	384
834	0.0007449	31	240	29	449
835	0.0007239	23	191	29	359
836	0.0007743	26	242	26	458
837	0.0005724	13	214	24	415
838	0.0005309	24	206	24	388
839	0.0006279	48	233	28	418
840	0.0007218	97	256	29	415
841	0.0006098	23	206	22	389
842	0.0005925	4	241	27	478
843	0.0007591	21	246	27	471
844	0.0007575	20	207	24	394
845	0.0007279	23	216	29	409
846	0.0007579	28	227	26	426
847	0.0007798	19	215	29	411
848	0.0007364	49	223	20	397
849	0.0007658	13	218	27	423
850	0.0006483	5	194	26	383
851	0.0007366	13	201	28	389
852	0.0006334	7	217	29	427
853	0.0006089	7	226	27	445
854	0.0005097	6	199	26	392
855	0.0006362	52	213	26	374
856	0.0008205	91	283	28	475
857	0.0007525	27	226	26	425
858	0.000752	14	209	25	404
859	0.0007526	91	262	28	433
860	0.000511	9	200	29	391
861	0.0007419	9	208	23	407
862	0.0007461	27	229	27	431
863	0.0008904	41	229	29	417
864	0.0008011	37	229	24	421
865	0.0008437	7	199	26	391
866	0.0006554	4	223	28	442
867	0.0005773	13	200	26	387
868	0.000743	16	221	29	426
869	0.0007705	55	227	27	399
870	0.001062	85	259	25	433
871	0.0010039	44	225	23	406
872	0.0006045	11	223	28	435
873	0.0007694	5	202	27	399
874	0.0007419	2	205	25	408
875	0.0006058	16	200	23	384
876	0.0007363	3	202	27	401
877	0.0006043	76	218	27	360
878	0.0005601	3	193	23	383
879	0.0007849	83	268	29	453
880	0.000757	14	215	23	416
881	0.0005238	8	200	29	392
882	0.0007658	81	237	25	393
883	0.0007606	30	216	27	402
884	0.0007302	5	216	27	427
885	0.0007153	29	220	22	411
886	0.0007175	66	238	23	410
887	0.0007521	19	226	21	433
888	0.0007621	8	223	29	438
889	0.0007703	37	222	25	407
890	0.0007294	79	227	23	375
891	0.0006513	7	194	28	381
892	0.0007176	11	190	27	369
893	0.0005909	12	224	23	436
894	0.0005823	5	214	23	423
895	0.00078	10	242	28	474
896	0.000771	20	217	22	414
897	0.000648	7	225	25	443
898	0.0007433	31	212	26	393
899	0.0007509	6	186	26	366
900	0.0007368	31	218	22	405
901	0.0008707	28	216	25	404
902	0.0007736	38	213	28	388
903	0.0007417	57	242	27	427
904	0.0007651	20	211	28	402
905	0.0008398	16	213	28	410
906	0.0007481	22	223	25	424
907	0.0007214	34	221	25	408
908	0.0006221	48	220	23	392
909	0.0007653	39	233	26	427
910	0.000564	62	227	21	392
911	0.0007478	25	228	28	431
912	0.0007686	15	226	27	437
913	0.0007547	9	218	26	427
914	0.0007146	20	215	25	410
915	0.0007239	8	231	29	454
916	0.0006544	63	243	27	423
917	0.0005891	11	202	27	393
918	0.0008864	43	223	28	403
919	0.0004935	1	200	21	399
920	0.000742	35	199	24	363
921	0.0006054	1	199	27	397
922	0.0007427	47	232	25	417
923	0.0007599	12	218	23	424
924	0.0005606	0	206	28	412
925	0.0007313	12	201	26	390
926	0.0007756	92	267	29	442
927	0.0005614	1	203	26	405
928	0.0007616	11	221	27	431
929	0.0006438	10	203	24	396
930	0.0007605	27	231	28	435
931	0.0007357	28	209	24	390
932	0.0007926	15	223	29	431
933	0.0005768	11	216	26	421
934	0.0005295	5	196	24	387
935	0.0006097	27	210	26	393
936	0.0007556	25	207	23	389
937	0.000818	74	256	28	438
938	0.0007425	19	216	24	413
939	0.0007508	34	226	26	418
940	0.0007646	35	230	29	425
941	0.0007977	40	215	26	390
942	0.0005229	2	204	29	406
943	0.0007918	29	227	23	425
944	0.0007577	52	219	25	386
945	0.0008095	45	249	29	453
946	0.0007371	65	251	25	437
947	0.0007336	15	226	29	437
948	0.0008771	10	200	26	390
949	0.0006127	36	229	22	422
950	0.0006101	9	198	27	387
951	0.0007793	9	232	25	455
952	0.0006212	17	206	28	395
953	0.0008037	12	214	28	416
954	0.000581	51	238	27	425
955	0.0005496	35	214	28	393
956	0.000744	31	237	23	443
957	0.0007471	63	237	27	411
958	0.0005186	10	219	25	428
959	0.0006104	30	238	25	446
960	0.0006294	38	238	25	438
961	0.0005659	0	212	28	424
962	0.0007697	51	258	27	465
963	0.0006254	1	181	28	361
964	0.0006801	39	216	29	393
965	0.0007473	10	230	28	450
966	0.0007613	145	299	21	453
967	0.0007404	75	264	29	453
968	0.000614	2	197	21	392
969	0.0005467	11	201	26	391
970	0.0008764	162	316	28	470
971	0.0006416	10	200	26	390
972	0.0007197	5	208	23	411
973	0.0006045	26	223	24	420
974	0.0008209	19	197	23	375
975	0.0007184	81	260	28	439
976	0.0005608	18	195	28	372
977	0.0007517	17	200	29	383
978	0.0005708	32	232	27	432
979	0.000807	44	227	20	410
980	0.000736	15	224	24	433
981	0.0007831	35	206	24	377
982	0.000755	20	204	23	388
983	0.0005408	2	213	24	424
984	0.0005787	28	231	24	434
985	0.0007364	55	233	25	411
986	0.0007523	104	239	29	374
987	0.0007359	50	265	27	480
988	0.0007461	85	270	29	455
989	0.0007449	34	211	29	388
990	0.0007981	8	220	29	432
991	0.0007857	22	194	28	366
992	0.0007316	13	225	28	437
993	0.000518	10	201	21	392
994	0.0006384	19	233	24	447
995	0.0010473	70	244	25	418
996	0.0007205	47	232	25	417
997	0.000741	74	250	26	426
998	0.0007423	30	230	28	430
999	0.0005506	12	205	28	398
mean	0.000698423	27.571	220.26	26.295	412.949
