# Supplementary material
Source: ML conference proceedings conference paper supplement (https://openreview.net/forum?id=2rAiDBJgR_)
Supplement: supplementary_material [file L_size-20_test.xlsx]

## Sheet: GS_MaleOpt
	time	SEq	Bal	Reg	Egal
0	0.0001642	71	98	13	125
1	0.0001486	99	116	17	133
2	0.0001638	32	71	12	110
3	0.0001546	58	101	16	144
4	0.0001908	12	58	11	104
5	0.000154	56	89	12	122
6	0.0001662	9	56	11	103
7	0.0001608	69	106	12	143
8	0.0001671	59	91	15	123
9	0.0001577	4	61	11	118
10	0.0001567	14	56	8	98
11	0.0001596	39	75	11	111
12	0.0001624	19	68	10	117
13	0.0001823	13	69	14	125
14	0.0001533	43	71	10	99
15	0.0001791	21	66	10	111
16	0.0001504	55	74	12	93
17	0.0001615	2	61	9	120
18	0.0001881	61	93	11	125
19	0.0001661	50	74	11	98
20	0.0001853	5	53	16	101
21	0.0001627	12	55	11	98
22	0.0001628	18	65	17	112
23	0.0001529	66	107	17	148
24	0.0001606	88	109	16	130
25	0.0002144	28	68	10	108
26	0.0001685	17	69	11	121
27	0.0001582	5	44	8	83
28	0.000159	48	83	19	118
29	0.0001543	43	88	15	133
30	0.0001803	28	71	18	114
31	0.000161	11	65	11	119
32	0.0002184	22	65	8	108
33	0.0001667	9	66	18	123
34	0.000153	58	90	13	122
35	0.000164	64	97	14	130
36	0.000159	26	77	14	128
37	0.0001938	10	65	15	120
38	0.0001692	14	69	12	124
39	0.0002053	12	68	14	124
40	0.0001503	27	66	9	105
41	0.0001637	20	74	12	128
42	0.00016	16	54	15	92
43	0.0001491	60	92	14	124
44	0.0001689	7	60	9	113
45	0.0001633	5	42	8	79
46	0.000167	71	104	14	137
47	0.0001805	17	69	16	121
48	0.000159	19	75	17	131
49	0.0001821	16	67	12	118
50	0.000167	33	68	11	103
51	0.0001517	46	80	13	114
52	0.0001916	74	99	11	124
53	0.0001684	10	74	17	138
54	0.0001549	15	50	15	85
55	0.0001608	32	65	10	98
56	0.0001494	61	94	16	127
57	0.0002154	25	80	16	135
58	0.0001469	34	58	8	82
59	0.000156	3	61	11	119
60	0.000153	28	69	8	110
61	0.0001595	3	50	10	97
62	0.0001591	16	63	11	110
63	0.00015	73	106	14	139
64	0.0001619	6	67	12	128
65	0.0001805	29	75	15	121
66	0.0001749	8	53	13	98
67	0.0001577	9	65	19	121
68	0.0001738	2	55	13	108
69	0.0001625	30	74	19	118
70	0.0001806	6	74	19	142
71	0.0001718	24	75	19	126
72	0.0001699	4	67	15	130
73	0.0001554	28	58	10	88
74	0.0001449	81	111	16	141
75	0.0001599	11	63	19	115
76	0.0001658	25	80	14	135
77	0.0001943	13	61	11	109
78	0.00015	60	88	13	116
79	0.0001697	12	68	13	124
80	0.0001556	17	60	11	103
81	0.0001532	7	47	10	87
82	0.0001704	59	78	11	97
83	0.0001679	1	43	13	85
84	0.0001577	7	58	12	109
85	0.0001546	48	91	13	134
86	0.0001496	91	106	16	121
87	0.0001506	17	54	7	91
88	0.0001896	16	54	10	92
89	0.000158	18	66	10	114
90	0.0001685	35	73	16	111
91	0.0001734	14	66	16	118
92	0.0001603	10	55	8	100
93	0.0001626	3	55	10	107
94	0.0001558	37	64	14	91
95	0.0001626	59	81	14	103
96	0.0001556	16	69	10	122
97	0.0001531	34	70	12	106
98	0.000184	50	87	15	124
99	0.000158	9	52	10	95
100	0.0001785	29	79	15	129
101	0.0001993	4	59	11	114
102	0.0001539	42	80	17	118
103	0.0001737	1	49	8	97
104	0.0001629	21	73	19	125
105	0.0001587	80	112	19	144
106	0.0001439	52	80	16	108
107	0.0001682	35	79	13	123
108	0.0001755	24	72	19	120
109	0.0001626	7	62	12	117
110	0.0001655	16	62	13	108
111	0.0002148	17	66	16	115
112	0.0001505	27	57	11	87
113	0.0001744	8	53	11	98
114	0.0001603	32	92	18	152
115	0.000168	34	71	13	108
116	0.0001812	57	95	10	133
117	0.0001706	13	58	9	103
118	0.0001668	37	77	10	117
119	0.0001615	18	57	8	96
120	0.0001541	10	64	12	118
121	0.0001613	43	84	12	125
122	0.0001571	20	65	14	110
123	0.0001896	36	75	13	114
124	0.0001624	32	76	11	120
125	0.0001709	1	68	12	135
126	0.0001672	39	82	15	125
127	0.0001622	29	77	15	125
128	0.0001692	25	81	17	137
129	0.0001818	18	67	11	116
130	0.0001825	24	79	18	134
131	0.0001703	4	72	11	140
132	0.0001581	5	57	12	109
133	0.0002131	77	110	17	143
134	0.0001712	8	58	11	108
135	0.0001612	11	61	10	111
136	0.0001698	76	111	15	146
137	0.0001596	44	75	12	106
138	0.0001583	24	76	18	128
139	0.000168	44	82	10	120
140	0.0001606	48	77	13	106
141	0.0001786	36	78	14	120
142	0.0002198	42	80	14	118
143	0.0001554	66	102	19	138
144	0.0001643	9	69	10	129
145	0.0001512	31	69	13	107
146	0.000188	36	68	11	100
147	0.000153	35	74	10	113
148	0.0001608	42	80	9	118
149	0.0003884	3	60	12	117
150	0.0001568	15	72	18	129
151	0.0001713	2	57	17	112
152	0.0001675	10	69	12	128
153	0.0001644	14	66	11	118
154	0.0001959	16	68	11	120
155	0.0001578	53	94	10	135
156	0.000149	71	96	19	121
157	0.0001602	55	82	12	109
158	0.0001743	4	53	14	102
159	0.0001598	10	55	9	100
160	0.000149	90	107	18	124
161	0.0001783	4	58	17	112
162	0.0001582	2	43	10	84
163	0.0001592	24	73	17	122
164	0.0001676	21	69	14	117
165	0.0001696	41	94	15	147
166	0.0001837	37	78	13	119
167	0.0001895	19	64	11	109
168	0.0001546	8	65	11	122
169	0.0001593	11	72	11	133
170	0.0001591	65	94	15	123
171	0.000169	15	66	10	117
172	0.0001631	14	68	10	122
173	0.0001549	47	74	11	101
174	0.0001622	3	65	11	127
175	0.0001577	38	76	13	114
176	0.0001536	56	89	14	122
177	0.0001803	4	45	12	86
178	0.000168	2	63	12	124
179	0.0001564	29	84	13	139
180	0.0001532	50	89	12	128
181	0.0002018	27	71	12	115
182	0.0001591	13	63	11	113
183	0.0001593	46	84	17	122
184	0.0001828	32	71	12	110
185	0.0001521	82	101	14	120
186	0.0001682	31	76	13	121
187	0.0001607	20	77	10	134
188	0.0001695	23	77	11	131
189	0.0001902	12	56	11	100
190	0.0001701	51	84	11	117
191	0.000175	7	58	9	109
192	0.0001641	0	65	13	130
193	0.0001605	23	64	9	105
194	0.0001543	22	79	13	136
195	0.0001637	7	63	11	119
196	0.0001565	42	77	11	112
197	0.000162	11	68	18	125
198	0.0001503	80	108	17	136
199	0.0001535	4	42	11	80
200	0.0001705	6	70	14	134
201	0.000156	3	60	11	117
202	0.000211	31	72	18	113
203	0.00019	30	68	9	106
204	0.0001712	2	69	18	136
205	0.0001888	0	67	19	134
206	0.0001739	47	77	11	107
207	0.000179	32	73	11	114
208	0.0001574	76	108	13	140
209	0.0001665	34	79	19	124
210	0.0001607	26	82	16	138
211	0.0001603	36	95	17	154
212	0.0001749	19	77	18	135
213	0.0001723	17	78	13	139
214	0.00016	42	88	17	134
215	0.0001764	16	67	15	118
216	0.000196	38	86	11	134
217	0.0001552	21	62	9	103
218	0.0001646	28	67	9	106
219	0.0001774	49	80	18	111
220	0.0001952	16	68	14	120
221	0.0001535	31	82	15	133
222	0.0001506	36	66	12	96
223	0.0002235	24	70	16	116
224	0.0001555	20	66	11	112
225	0.0001704	13	88	19	163
226	0.0001543	15	63	10	111
227	0.0001553	35	68	10	101
228	0.0001953	10	79	19	148
229	0.0001604	17	69	10	121
230	0.000162	24	64	10	104
231	0.0001566	38	87	15	136
232	0.0001515	48	80	11	112
233	0.0001556	32	73	13	114
234	0.0001618	3	58	8	113
235	0.0001638	43	83	15	123
236	0.0001558	24	70	12	116
237	0.000171	22	74	17	126
238	0.0001626	4	61	12	118
239	0.0001607	14	59	10	104
240	0.0002036	21	88	17	155
241	0.0001665	8	63	9	118
242	0.0001615	17	74	16	131
243	0.0001726	18	76	19	134
244	0.0001688	25	65	11	105
245	0.0001636	16	65	12	114
246	0.0001598	8	61	12	114
247	0.000162	32	86	12	140
248	0.0001793	15	69	11	123
249	0.0001629	24	76	17	128
250	0.0001554	8	52	14	96
251	0.0001652	11	67	16	123
252	0.0001677	34	74	15	114
253	0.0001607	8	64	10	120
254	0.000163	78	112	15	146
255	0.0001617	70	105	19	140
256	0.0001683	1	47	8	93
257	0.000169	6	64	11	122
258	0.0001635	26	72	11	118
259	0.00016	5	57	12	109
260	0.0001714	18	67	17	116
261	0.0001498	37	76	17	115
262	0.0001866	65	89	12	113
263	0.0001512	54	83	17	112
264	0.0001535	42	81	12	120
265	0.000179	66	110	19	154
266	0.0001647	18	63	14	108
267	0.0001586	17	69	13	121
268	0.000162	40	77	11	114
269	0.0001907	4	73	17	142
270	0.0001621	20	71	12	122
271	0.0001689	32	76	13	120
272	0.0001608	7	64	12	121
273	0.0001604	34	81	18	128
274	0.0001631	0	60	17	120
275	0.0001501	85	112	18	139
276	0.0001719	11	83	18	155
277	0.0001458	85	106	12	127
278	0.0001547	11	63	14	115
279	0.0001687	0	71	18	142
280	0.0001644	21	72	14	123
281	0.0001702	27	87	12	147
282	0.0001877	12	51	10	90
283	0.0001489	76	102	15	128
284	0.0001526	43	77	9	111
285	0.0001639	42	83	12	124
286	0.0001617	82	119	17	156
287	0.0001559	66	104	11	142
288	0.0001578	66	92	16	118
289	0.0001475	21	51	8	81
290	0.0001818	69	116	17	163
291	0.0001463	56	78	13	100
292	0.0001792	12	73	19	134
293	0.0001622	35	69	9	103
294	0.0001612	23	71	14	119
295	0.0001648	49	81	13	113
296	0.0001559	0	57	18	114
297	0.0001663	22	80	16	138
298	0.0001528	48	83	12	118
299	0.0001707	2	64	18	126
300	0.0001602	3	67	19	131
301	0.0001593	12	62	9	112
302	0.0001608	24	63	11	102
303	0.0001575	16	59	14	102
304	0.0001577	58	92	19	126
305	0.0001603	6	57	12	108
306	0.0001496	38	73	10	108
307	0.000193	41	90	16	139
308	0.0001557	7	64	11	121
309	0.0001486	74	103	12	132
310	0.0001681	22	73	9	124
311	0.0001564	39	87	16	135
312	0.0001475	106	125	16	144
313	0.0001595	24	76	17	128
314	0.0001598	3	65	10	127
315	0.0001772	8	66	17	124
316	0.0001614	34	75	17	116
317	0.0001666	14	63	12	112
318	0.0001609	11	55	10	99
319	0.0001969	19	75	12	131
320	0.000185	31	69	17	107
321	0.0001773	18	61	9	104
322	0.0001548	53	75	17	97
323	0.000248	15	64	13	113
324	0.0001662	20	70	14	120
325	0.0001477	99	115	18	131
326	0.0001826	27	65	15	103
327	0.0001592	6	60	15	114
328	0.000154	66	101	18	136
329	0.0001669	57	95	16	133
330	0.0001709	17	73	14	129
331	0.0002083	14	69	14	124
332	0.0001764	47	85	14	123
333	0.0001571	35	75	15	115
334	0.0001553	50	83	14	116
335	0.000153	62	97	12	132
336	0.0001552	37	71	10	105
337	0.0001604	9	61	14	113
338	0.0002065	37	77	9	117
339	0.0001547	27	71	19	115
340	0.0001625	5	57	7	109
341	0.0001587	8	55	19	102
342	0.0001597	9	72	11	135
343	0.0001579	8	44	10	80
344	0.000167	2	50	11	98
345	0.0001662	6	66	13	126
346	0.0001643	27	82	11	137
347	0.0001623	23	70	18	117
348	0.0001725	10	69	19	128
349	0.00018	6	49	10	92
350	0.0001582	15	55	10	95
351	0.0001511	35	79	9	123
352	0.000149	40	81	17	122
353	0.0001995	7	61	11	115
354	0.0001569	38	69	10	100
355	0.0001633	18	65	9	112
356	0.0001595	7	69	13	131
357	0.0001729	1	69	13	137
358	0.0001673	23	87	18	151
359	0.000164	22	60	9	98
360	0.0001599	32	92	16	152
361	0.0001495	64	95	11	126
362	0.0001699	83	100	15	117
363	0.0001526	2	40	11	78
364	0.0001646	25	78	18	131
365	0.0001499	78	102	13	126
366	0.0001549	24	73	19	122
367	0.0001516	28	70	11	112
368	0.0001471	102	121	18	140
369	0.0001653	19	61	11	103
370	0.0002057	32	67	13	102
371	0.0001703	21	79	16	137
372	0.0001721	17	79	17	141
373	0.0001869	70	110	12	150
374	0.0001614	37	86	15	135
375	0.000158	27	72	11	117
376	0.0001558	3	53	19	103
377	0.0001567	32	69	11	106
378	0.000161	24	78	11	132
379	0.0001639	2	65	11	128
380	0.0001839	10	70	17	130
381	0.0001544	8	52	13	96
382	0.0001523	57	101	18	145
383	0.0001861	35	70	9	105
384	0.0001546	40	75	14	110
385	0.0001757	22	91	14	160
386	0.0002058	6	53	12	100
387	0.0001522	57	92	10	127
388	0.0001567	14	65	13	116
389	0.0001495	49	82	15	115
390	0.0001728	49	85	11	121
391	0.000155	5	46	6	87
392	0.0001573	0	51	9	102
393	0.0001726	39	83	16	127
394	0.0001624	11	69	13	127
395	0.0001814	25	75	19	125
396	0.0001654	38	77	12	116
397	0.0001722	13	66	11	119
398	0.0002015	48	91	10	134
399	0.0001719	54	101	19	148
400	0.0001859	17	68	19	119
401	0.0001571	4	55	16	106
402	0.0001545	13	61	8	109
403	0.0001769	37	73	15	109
404	0.0001744	17	83	15	149
405	0.0001542	20	59	14	98
406	0.0001611	18	74	13	130
407	0.0001505	79	108	13	137
408	0.0001757	12	82	11	152
409	0.0002051	19	65	13	111
410	0.0001507	34	77	16	120
411	0.0001587	1	48	11	95
412	0.0001926	27	74	17	121
413	0.0001783	4	74	15	144
414	0.0001805	36	83	13	130
415	0.0001711	23	75	17	127
416	0.0001716	38	80	16	122
417	0.0001922	5	76	16	147
418	0.0001606	26	80	13	134
419	0.0001574	43	90	15	137
420	0.0001667	52	95	11	138
421	0.0001546	57	90	10	123
422	0.000161	62	85	14	108
423	0.0001532	43	79	11	115
424	0.0001592	15	67	15	119
425	0.0001746	7	61	12	115
426	0.0001763	0	63	16	126
427	0.0001572	34	77	11	120
428	0.0001562	41	88	11	135
429	0.0001719	25	70	14	115
430	0.0001625	30	71	9	112
431	0.0001591	7	54	9	101
432	0.0001664	58	89	17	120
433	0.0001617	36	67	9	98
434	0.000176	30	67	11	104
435	0.0001576	11	66	9	121
436	0.0001576	1	59	13	117
437	0.0001544	81	103	11	125
438	0.0001763	22	66	14	110
439	0.0002512	44	83	17	122
440	0.0001596	55	107	17	159
441	0.0001967	3	64	17	125
442	0.0001655	22	83	13	144
443	0.0001683	79	105	14	131
444	0.0001653	18	63	17	108
445	0.0001921	19	82	12	145
446	0.0001631	21	74	12	127
447	0.0001701	7	71	18	135
448	0.0001671	23	87	19	151
449	0.00017	16	59	13	102
450	0.0001587	8	67	12	126
451	0.000173	30	64	9	98
452	0.0001597	25	76	12	127
453	0.0001597	58	98	16	138
454	0.0001582	54	84	17	114
455	0.0001785	53	93	12	133
456	0.0001546	25	67	11	109
457	0.0001898	34	83	11	132
458	0.0001658	29	80	16	131
459	0.0003166	64	90	17	116
460	0.0001713	17	66	11	115
461	0.000158	17	72	18	127
462	0.0001631	26	67	11	108
463	0.0001636	2	63	17	124
464	0.000153	42	73	14	104
465	0.0001547	83	120	15	157
466	0.0001546	28	76	16	124
467	0.0001659	65	87	11	109
468	0.000172	9	79	19	149
469	0.0001491	75	101	14	127
470	0.0002049	19	69	10	119
471	0.0001578	7	54	9	101
472	0.0001533	45	82	12	119
473	0.0001573	8	58	13	108
474	0.0001626	13	44	6	75
475	0.0001634	22	66	14	110
476	0.0001587	27	61	11	95
477	0.0001732	24	78	13	132
478	0.0001527	27	68	10	109
479	0.0001508	35	64	10	93
480	0.0001484	99	117	11	135
481	0.0001689	8	67	16	126
482	0.0001636	18	66	13	114
483	0.0001568	39	72	18	105
484	0.0001661	46	89	16	132
485	0.0001856	20	71	11	122
486	0.0001669	28	70	13	112
487	0.0001895	1	65	15	129
488	0.0001567	40	81	15	122
489	0.0001523	39	89	11	139
490	0.0001655	20	77	14	134
491	0.0001524	38	76	12	114
492	0.0001708	33	94	15	155
493	0.0001754	10	66	16	122
494	0.000162	62	89	11	116
495	0.0002006	9	53	12	97
496	0.0001604	47	89	9	131
497	0.0001593	3	63	19	123
498	0.0001742	42	91	18	140
499	0.0001572	3	58	14	113
500	0.0001643	17	60	10	103
501	0.0001826	10	80	19	150
502	0.0001641	14	68	12	122
503	0.0001547	48	81	11	114
504	0.0001783	4	68	18	132
505	0.0001562	29	76	14	123
506	0.000149	47	70	11	93
507	0.0001648	5	62	18	119
508	0.0001597	0	67	18	134
509	0.0001467	69	93	11	117
510	0.0001549	15	65	18	115
511	0.0001756	12	86	19	160
512	0.0001575	37	82	14	127
513	0.0001551	45	79	12	113
514	0.0001577	45	74	10	103
515	0.0001569	20	75	13	130
516	0.0001543	82	100	14	118
517	0.0001621	45	85	16	125
518	0.0001757	6	63	13	120
519	0.0001544	35	78	11	121
520	0.0001616	2	51	10	100
521	0.0001649	13	63	16	113
522	0.0001502	55	89	15	123
523	0.000176	19	71	15	123
524	0.0001582	25	67	19	109
525	0.0001591	5	56	16	107
526	0.0001698	16	68	15	120
527	0.0001701	27	75	9	123
528	0.0001761	49	80	15	111
529	0.0001713	1	54	8	107
530	0.0001606	6	66	19	126
531	0.0001944	4	60	10	116
532	0.0001681	35	77	13	119
533	0.0001567	10	61	19	112
534	0.0001775	33	68	14	103
535	0.0001803	11	64	10	117
536	0.0001644	2	69	19	136
537	0.0001687	12	71	15	130
538	0.0001532	26	63	17	100
539	0.0001504	111	127	18	143
540	0.0001672	11	64	13	117
541	0.0001517	18	59	8	100
542	0.0001513	77	117	16	157
543	0.0001593	26	78	10	130
544	0.000217	18	72	13	126
545	0.0001533	50	88	17	126
546	0.0001749	6	59	17	112
547	0.000153	57	97	11	137
548	0.000151	48	83	11	118
549	0.0001663	3	57	10	111
550	0.0001702	34	84	17	134
551	0.0001913	20	75	10	130
552	0.0001604	26	75	10	124
553	0.0001552	91	115	13	139
554	0.0001639	9	63	16	117
555	0.0001715	14	62	13	110
556	0.0001624	0	62	17	124
557	0.0001508	51	79	10	107
558	0.0001618	15	61	13	107
559	0.0001629	24	68	10	112
560	0.0001715	1	59	11	117
561	0.0001571	17	61	12	105
562	0.0001574	16	50	9	84
563	0.0001596	84	117	18	150
564	0.0001662	9	52	13	95
565	0.0001585	13	54	9	95
566	0.0001588	4	63	10	122
567	0.0001545	32	76	11	120
568	0.0001512	43	79	15	115
569	0.0001607	14	62	10	110
570	0.000167	23	79	15	135
571	0.0001696	26	66	12	106
572	0.000158	0	62	11	124
573	0.0001621	3	48	9	93
574	0.0001558	11	61	10	111
575	0.0001572	15	62	13	109
576	0.0001707	60	86	16	112
577	0.0001562	44	82	18	120
578	0.0001566	3	49	9	95
579	0.0001562	11	51	10	91
580	0.0001657	23	75	12	127
581	0.0002349	22	71	11	120
582	0.000155	92	115	16	138
583	0.0001511	54	85	10	116
584	0.0001722	20	71	12	122
585	0.000153	31	75	19	119
586	0.000165	18	72	18	126
587	0.0001801	30	76	17	122
588	0.0001739	14	73	16	132
589	0.0001582	45	88	10	131
590	0.0001657	15	77	17	139
591	0.000174	4	64	11	124
592	0.0001754	59	94	11	129
593	0.0001566	6	49	9	92
594	0.0001478	39	71	10	103
595	0.0001516	47	84	10	121
596	0.0001727	27	71	12	115
597	0.0001555	37	97	19	157
598	0.0001515	49	76	11	103
599	0.000164	51	87	12	123
600	0.0001544	7	52	11	97
601	0.0001565	14	60	11	106
602	0.0001551	41	74	9	107
603	0.0001793	20	64	10	108
604	0.0001602	91	112	16	133
605	0.0001826	46	89	13	132
606	0.0001938	32	76	10	120
607	0.0001693	25	79	16	133
608	0.0001589	7	54	11	101
609	0.0001523	53	91	13	129
610	0.0001658	49	76	9	103
611	0.0001706	26	63	9	100
612	0.0001636	55	89	14	123
613	0.0001487	79	108	11	137
614	0.0001584	3	62	13	121
615	0.0001566	28	68	10	108
616	0.0001602	13	74	16	135
617	0.0001537	8	56	11	104
618	0.0001574	15	54	9	93
619	0.0001556	51	86	11	121
620	0.0001553	1	48	11	95
621	0.0001527	23	60	10	97
622	0.000164	20	62	11	104
623	0.0001708	23	84	13	145
624	0.0001717	29	68	11	107
625	0.0001694	12	69	9	126
626	0.00017	5	65	15	125
627	0.0001941	25	76	16	127
628	0.0001665	18	68	15	118
629	0.0001648	3	43	10	83
630	0.000149	51	72	12	93
631	0.000165	0	65	18	130
632	0.0001546	5	47	17	89
633	0.0001636	45	77	12	109
634	0.0001614	24	76	12	128
635	0.0001533	7	62	16	117
636	0.0001871	10	54	9	98
637	0.0001686	10	77	19	144
638	0.0001549	7	59	9	111
639	0.0001706	3	57	12	111
640	0.0001576	51	97	17	143
641	0.000153	27	64	11	101
642	0.0001675	61	91	12	121
643	0.0001635	46	81	9	116
644	0.0001709	13	51	8	89
645	0.0001705	7	53	9	99
646	0.0001882	16	70	16	124
647	0.0001652	7	53	9	99
648	0.0001618	13	59	12	105
649	0.000154	73	106	15	139
650	0.0001603	11	67	19	123
651	0.0001533	18	68	17	118
652	0.0001604	21	66	11	111
653	0.0001557	9	66	17	123
654	0.0001572	31	77	9	123
655	0.0001482	41	74	12	107
656	0.0001574	13	63	16	113
657	0.000175	32	69	13	106
658	0.0001696	13	66	15	119
659	0.00016	43	87	11	131
660	0.0001634	28	84	18	140
661	0.0001774	41	89	16	137
662	0.0001554	2	52	9	102
663	0.0001655	8	69	9	130
664	0.0001579	0	52	18	104
665	0.0001667	16	63	12	110
666	0.0001596	9	73	18	137
667	0.0001716	31	76	10	121
668	0.0001574	9	66	15	123
669	0.0001613	25	76	13	127
670	0.0001917	43	76	17	109
671	0.0001695	30	67	13	104
672	0.0001492	41	69	8	97
673	0.0001558	66	112	17	158
674	0.0001838	6	63	19	120
675	0.0001714	11	77	15	143
676	0.0001557	29	68	10	107
677	0.0001915	12	60	11	108
678	0.000177	12	61	8	110
679	0.0001592	0	49	9	98
680	0.0001502	75	98	17	121
681	0.0001725	26	81	16	136
682	0.0001514	19	63	14	107
683	0.0001755	34	79	10	124
684	0.0001992	23	87	18	151
685	0.0002008	24	95	19	166
686	0.0001946	13	79	19	145
687	0.0001913	64	95	16	126
688	0.0001679	17	67	13	117
689	0.0001599	6	66	12	126
690	0.0001587	5	58	16	111
691	0.0001693	17	80	14	143
692	0.0001978	5	63	13	121
693	0.0001645	28	80	15	132
694	0.0001479	50	85	16	120
695	0.000171	57	94	11	131
696	0.0001672	21	76	15	131
697	0.000182	24	79	10	134
698	0.0001662	40	80	12	120
699	0.0001634	30	69	8	108
700	0.0001517	51	83	12	115
701	0.0001872	51	79	12	107
702	0.000195	74	107	11	140
703	0.0001797	10	65	17	120
704	0.0001811	15	64	11	113
705	0.0001521	52	87	11	122
706	0.0001787	14	58	10	102
707	0.0001564	14	58	15	102
708	0.0001515	39	75	12	111
709	0.000161	29	77	10	125
710	0.0001536	35	62	16	89
711	0.000159	23	69	13	115
712	0.0001722	7	70	18	133
713	0.0001576	29	77	19	125
714	0.0001571	21	65	10	109
715	0.0001559	43	82	16	121
716	0.0001668	20	72	16	124
717	0.0001571	39	85	13	131
718	0.0001615	21	80	16	139
719	0.0001562	63	101	13	139
720	0.0001597	8	68	17	128
721	0.0001736	54	81	11	108
722	0.0001516	32	70	12	108
723	0.0001672	10	72	18	134
724	0.0001673	0	49	13	98
725	0.0001559	14	67	13	120
726	0.0001609	27	68	12	109
727	0.0001997	31	80	13	129
728	0.0001813	3	51	11	99
729	0.0001587	14	63	10	112
730	0.0001635	69	110	19	151
731	0.0001612	37	66	15	95
732	0.0001591	90	120	19	150
733	0.0002234	21	63	9	105
734	0.000156	35	77	14	119
735	0.000158	24	64	10	104
736	0.0001738	56	93	13	130
737	0.0001551	24	66	10	108
738	0.0001514	97	129	17	161
739	0.0001807	23	69	9	115
740	0.0001862	19	72	16	125
741	0.0001594	6	57	9	108
742	0.0001922	31	73	14	115
743	0.0001634	19	69	10	119
744	0.0001594	23	75	10	127
745	0.0001659	28	74	11	120
746	0.0001585	73	101	15	129
747	0.0001564	35	76	12	117
748	0.0001715	17	58	9	99
749	0.0001597	49	88	10	127
750	0.0001551	13	57	10	101
751	0.000164	45	77	11	109
752	0.0001641	13	65	11	117
753	0.0001857	36	83	17	130
754	0.0001555	50	86	12	122
755	0.0001813	30	81	16	132
756	0.0001701	20	69	19	118
757	0.0001752	29	70	16	111
758	0.0001641	33	75	9	117
759	0.0001729	24	74	15	124
760	0.000177	35	84	16	133
761	0.0001577	29	55	9	81
762	0.0001717	32	76	11	120
763	0.0001592	6	68	9	130
764	0.000151	73	99	13	125
765	0.0001645	64	93	13	122
766	0.0002057	39	82	9	125
767	0.0001815	67	89	11	111
768	0.0001496	47	76	12	105
769	0.0001594	10	61	12	112
770	0.0001589	54	106	19	158
771	0.0001589	14	85	18	156
772	0.0001763	67	104	19	141
773	0.0001541	42	78	11	114
774	0.0001748	11	54	9	97
775	0.0001677	45	87	11	129
776	0.000152	19	50	11	81
777	0.0001732	20	65	16	110
778	0.0001609	38	82	18	126
779	0.0001738	17	68	9	119
780	0.0001504	48	84	12	120
781	0.0001678	22	74	13	126
782	0.0001619	24	76	14	128
783	0.0001613	1	54	7	107
784	0.0001658	35	66	11	97
785	0.0001633	14	74	19	134
786	0.0001539	54	90	16	126
787	0.0001574	23	69	9	115
788	0.0001562	14	57	14	100
789	0.0001492	63	93	15	123
790	0.0001791	8	61	11	114
791	0.000174	4	61	19	118
792	0.0001623	14	73	19	132
793	0.0001996	12	69	15	126
794	0.0001545	13	54	9	95
795	0.0001681	25	77	19	129
796	0.0001665	53	96	16	139
797	0.0001576	66	107	18	148
798	0.0001566	7	67	13	127
799	0.0001621	31	67	14	103
800	0.0001666	1	58	14	115
801	0.0001522	13	54	17	95
802	0.0001542	20	65	12	110
803	0.0001746	37	82	13	127
804	0.0001769	44	95	15	146
805	0.0001721	49	90	16	131
806	0.0001515	57	91	12	125
807	0.0001585	30	64	12	98
808	0.0001693	33	75	15	117
809	0.0001668	19	75	12	131
810	0.0001632	1	60	11	119
811	0.0001621	4	65	13	126
812	0.0001618	10	61	16	112
813	0.0001588	9	56	10	103
814	0.0001455	92	109	19	126
815	0.0001574	13	51	10	89
816	0.0001871	18	73	11	128
817	0.0001899	39	89	14	139
818	0.0001591	3	55	13	107
819	0.00016	1	59	11	117
820	0.0001575	6	64	12	122
821	0.0001501	68	101	10	134
822	0.0001803	14	87	18	160
823	0.0001735	35	95	19	155
824	0.0001602	17	63	10	109
825	0.0001866	5	64	13	123
826	0.0001617	16	69	10	122
827	0.0001715	3	63	12	123
828	0.0001692	53	91	17	129
829	0.0001565	49	94	16	139
830	0.000162	66	96	12	126
831	0.0001713	1	71	11	141
832	0.0001742	68	103	13	138
833	0.0001598	47	92	15	137
834	0.0001583	29	76	11	123
835	0.0001734	6	58	12	110
836	0.0001533	15	59	9	103
837	0.0001712	17	60	17	103
838	0.0001703	19	81	19	143
839	0.0001532	7	59	16	111
840	0.0001575	16	62	10	108
841	0.000155	34	80	14	126
842	0.0001577	23	69	12	115
843	0.0001652	18	67	9	116
844	0.0001582	27	74	10	121
845	0.0001719	10	64	18	118
846	0.000187	7	65	18	123
847	0.000155	62	92	18	122
848	0.0001656	9	60	7	111
849	0.0001551	56	103	16	150
850	0.0001632	61	87	11	113
851	0.0001611	45	77	17	109
852	0.0001521	48	72	11	96
853	0.0001935	13	71	16	129
854	0.0001665	26	65	10	104
855	0.0001524	41	69	8	97
856	0.0002078	21	79	14	137
857	0.0001552	56	83	15	110
858	0.0001591	9	60	8	111
859	0.0001623	17	67	8	117
860	0.0001645	102	127	12	152
861	0.0001897	56	95	16	134
862	0.0001726	7	57	9	107
863	0.0001512	29	63	10	97
864	0.000193	16	67	12	118
865	0.0001607	28	80	10	132
866	0.00017	47	88	14	129
867	0.0001594	11	64	19	117
868	0.0001621	58	95	19	132
869	0.0001524	52	87	11	122
870	0.0001703	25	53	7	81
871	0.0001664	38	85	16	132
872	0.0001638	25	73	9	121
873	0.0001641	2	68	14	134
874	0.0001663	17	71	15	125
875	0.0001511	61	94	15	127
876	0.0001747	4	69	12	134
877	0.0001768	3	64	13	125
878	0.000161	13	61	11	109
879	0.0001537	49	81	17	113
880	0.0001677	14	71	15	128
881	0.0001545	11	49	9	87
882	0.0001635	13	67	10	121
883	0.0001573	26	81	11	136
884	0.0001573	72	114	13	156
885	0.0001688	7	56	9	105
886	0.0001552	59	94	16	129
887	0.000165	12	60	12	108
888	0.0001747	9	65	10	121
889	0.0001569	31	77	19	123
890	0.0001591	7	61	15	115
891	0.0001519	75	103	18	131
892	0.0001784	21	76	18	131
893	0.0001561	5	57	10	109
894	0.0001607	1	57	13	113
895	0.0001621	33	75	11	117
896	0.0001616	18	58	12	98
897	0.0001613	40	77	14	114
898	0.0001555	6	58	16	110
899	0.0001727	15	74	13	133
900	0.0001647	81	106	12	131
901	0.0001637	28	66	10	104
902	0.0001696	28	82	13	136
903	0.000166	17	73	11	129
904	0.0001788	15	74	16	133
905	0.0001684	21	68	15	115
906	0.0001671	25	65	9	105
907	0.0001623	27	73	11	119
908	0.0001528	32	72	9	112
909	0.0001663	14	64	13	114
910	0.000152	61	97	19	133
911	0.0001586	38	78	12	118
912	0.0001652	9	66	13	123
913	0.0001588	14	71	17	128
914	0.0001644	19	65	10	111
915	0.0001545	68	93	15	118
916	0.0001599	12	58	10	104
917	0.000151	73	107	14	141
918	0.0001549	25	63	11	101
919	0.000168	38	84	13	130
920	0.0001768	16	69	13	122
921	0.0001608	38	84	19	130
922	0.0001733	12	60	10	108
923	0.0002024	11	67	12	123
924	0.0001632	14	74	16	134
925	0.0001683	18	65	13	112
926	0.0001552	17	66	15	115
927	0.0001609	56	100	19	144
928	0.0001857	57	90	13	123
929	0.0001775	44	77	10	110
930	0.000155	58	97	17	136
931	0.0001632	16	69	12	122
932	0.0001533	35	76	16	117
933	0.0001646	12	54	7	96
934	0.0001595	4	63	11	122
935	0.0001947	6	64	15	122
936	0.0001624	6	74	17	142
937	0.0001555	33	74	17	115
938	0.0002272	15	65	13	115
939	0.0001602	24	69	14	114
940	0.0001629	12	58	11	104
941	0.00019	12	69	13	126
942	0.0001562	95	121	14	147
943	0.0001497	78	102	13	126
944	0.0001518	61	89	11	117
945	0.0001543	25	69	10	113
946	0.0001862	42	68	11	94
947	0.0001747	22	77	13	132
948	0.0001649	10	66	16	122
949	0.0001601	20	71	10	122
950	0.0001957	65	98	13	131
951	0.0001716	6	56	10	106
952	0.0001585	5	55	10	105
953	0.0001634	7	65	19	123
954	0.0001901	44	78	11	112
955	0.0003709	18	65	9	112
956	0.0001771	5	60	10	115
957	0.0001635	4	42	12	80
958	0.0001657	11	57	11	103
959	0.0001462	51	73	12	95
960	0.0001546	38	78	15	118
961	0.000164	7	69	16	131
962	0.0001781	9	69	16	129
963	0.0001652	10	57	10	104
964	0.0001513	68	96	11	124
965	0.0001744	52	94	11	136
966	0.0001712	39	82	14	125
967	0.0001598	39	81	14	123
968	0.0001697	34	73	11	112
969	0.0001852	21	59	9	97
970	0.0001939	10	51	7	92
971	0.0001515	58	85	12	112
972	0.0001705	21	66	9	111
973	0.0001637	21	66	10	111
974	0.0001635	22	70	12	118
975	0.0001556	67	101	13	135
976	0.0001912	42	88	16	134
977	0.0001638	1	57	11	113
978	0.0001648	26	69	8	112
979	0.0001796	32	76	13	120
980	0.0001714	25	75	11	125
981	0.0001751	33	77	16	121
982	0.0001579	18	62	10	106
983	0.0001764	49	84	12	119
984	0.0001602	6	53	10	100
985	0.000158	31	72	10	113
986	0.0001835	17	82	19	147
987	0.0001595	7	65	8	123
988	0.0001653	20	72	13	124
989	0.0001738	5	67	10	129
990	0.0001615	42	78	11	114
991	0.0001535	17	65	11	113
992	0.0001806	36	74	10	112
993	0.0001571	46	81	12	116
994	0.0001513	45	80	12	115
995	0.0002086	1	50	10	99
996	0.0001568	58	97	12	136
997	0.0001558	38	78	9	118
998	0.0001548	38	78	13	118
999	0.0001571	7	58	17	109
mean	0.000166636	28.642	73.942	13.177	119.242

## Sheet: GS_FemaleOpt
	time	SEq	Bal	Reg	Egal
0	0.0001738	34	74	8	114
1	0.0001656	39	76	16	113
2	0.0001669	32	71	12	110
3	0.0001544	26	80	13	134
4	0.0001572	57	88	14	119
5	0.000179	7	60	10	113
6	0.0001598	9	56	11	103
7	0.0001568	77	99	9	121
8	0.0001741	43	79	16	115
9	0.0001959	18	73	11	128
10	0.0002076	14	56	8	98
11	0.0001743	18	64	11	110
12	0.0001675	19	68	10	117
13	0.0001729	13	69	14	125
14	0.00019	43	71	10	99
15	0.0001519	46	78	10	110
16	0.0001905	3	53	12	103
17	0.0001693	2	61	9	120
18	0.0001622	19	55	10	91
19	0.000162	50	74	11	98
20	0.0001623	5	53	16	101
21	0.0001725	12	55	11	98
22	0.0001648	7	53	17	99
23	0.00017	12	65	11	118
24	0.0001864	7	61	12	115
25	0.0001713	28	68	10	108
26	0.0001651	39	75	11	111
27	0.0001526	28	57	12	86
28	0.0001624	13	59	9	105
29	0.0001649	67	105	14	143
30	0.0001566	28	71	18	114
31	0.0001753	38	83	11	128
32	0.0001663	9	56	8	103
33	0.0001706	9	66	18	123
34	0.0001683	31	69	10	107
35	0.0001682	29	77	10	125
36	0.0001717	26	77	14	128
37	0.0001529	29	73	15	117
38	0.0001543	58	91	13	124
39	0.0001592	12	68	14	124
40	0.0001504	16	61	9	106
41	0.0001549	27	71	13	115
42	0.0001658	1	47	15	93
43	0.0001689	58	81	12	104
44	0.0001944	37	80	19	123
45	0.0001725	43	62	8	81
46	0.0001632	52	91	13	130
47	0.0001638	17	69	16	121
48	0.000165	16	72	17	128
49	0.0001508	57	92	12	127
50	0.0001625	33	68	11	103
51	0.000165	29	75	13	121
52	0.0001604	74	99	11	124
53	0.0001692	46	95	12	144
54	0.0001605	19	48	11	77
55	0.0001567	4	48	7	92
56	0.000188	40	79	16	118
57	0.0001698	25	80	16	135
58	0.0001642	15	48	8	81
59	0.0001547	12	61	10	110
60	0.0001608	42	78	12	114
61	0.0001592	3	50	10	97
62	0.0001626	16	63	11	110
63	0.000161	52	90	11	128
64	0.0001648	6	67	12	128
65	0.0001798	2	60	15	118
66	0.0001511	15	57	13	99
67	0.0001902	12	67	19	122
68	0.0001718	12	64	13	116
69	0.000163	30	74	19	118
70	0.0002041	6	74	19	142
71	0.0001543	45	91	19	137
72	0.0001752	41	84	14	127
73	0.0001513	28	58	10	88
74	0.0001587	5	68	16	131
75	0.0001547	26	71	19	116
76	0.0002127	25	80	14	135
77	0.000174	10	59	11	108
78	0.0001666	26	77	13	128
79	0.0001576	12	68	13	124
80	0.0001502	38	71	11	104
81	0.0001575	18	55	10	92
82	0.0002219	59	78	11	97
83	0.0001541	46	70	12	94
84	0.0001573	36	73	9	110
85	0.0001681	3	62	13	121
86	0.0001661	16	68	13	120
87	0.0001768	17	54	7	91
88	0.0001679	32	66	14	100
89	0.0001661	54	84	11	114
90	0.000153	35	73	16	111
91	0.0002035	42	77	14	112
92	0.0001776	10	55	8	100
93	0.0001659	34	79	18	124
94	0.0001653	37	64	14	91
95	0.0001574	2	51	11	100
96	0.000155	43	83	15	123
97	0.0001501	51	79	16	107
98	0.0001889	28	76	13	124
99	0.000151	47	72	10	97
100	0.0001539	47	82	10	117
101	0.0001547	14	62	10	110
102	0.0001648	3	57	11	111
103	0.0001645	13	56	7	99
104	0.0001899	21	73	19	125
105	0.0001573	62	111	18	160
106	0.0001591	30	69	18	108
107	0.0001471	122	140	18	158
108	0.0001614	13	67	19	121
109	0.0001563	7	62	12	117
110	0.0001551	13	58	11	103
111	0.0002179	7	61	16	115
112	0.0001748	27	57	11	87
113	0.0001533	40	70	9	100
114	0.0002258	15	82	18	149
115	0.0001873	33	65	8	97
116	0.0001826	38	83	13	128
117	0.0001759	21	67	15	113
118	0.0001515	30	69	12	108
119	0.0001616	58	85	12	112
120	0.0001719	10	64	12	118
121	0.0001574	9	62	10	115
122	0.0001927	15	61	8	107
123	0.0001659	36	75	13	114
124	0.0001592	20	67	12	114
125	0.0001558	53	91	14	129
126	0.0001577	37	80	13	123
127	0.0001613	37	68	12	99
128	0.0001653	25	81	17	137
129	0.0001638	10	61	11	112
130	0.0003807	62	96	18	130
131	0.0001644	55	98	11	141
132	0.0001647	5	57	12	109
133	0.0001554	77	110	17	143
134	0.0001521	67	88	12	109
135	0.0001609	12	60	9	108
136	0.0001715	46	91	14	136
137	0.0001632	8	54	12	100
138	0.0001649	24	76	18	128
139	0.0001852	31	78	8	125
140	0.0001935	36	75	17	114
141	0.0001538	48	80	12	112
142	0.000157	11	67	12	123
143	0.000159	42	81	12	120
144	0.0001819	16	72	11	128
145	0.0001611	50	83	12	116
146	0.0001595	54	76	11	98
147	0.0001846	3	54	10	105
148	0.0001605	28	74	13	120
149	0.000156	80	111	19	142
150	0.0001607	4	67	18	130
151	0.0001605	4	59	17	114
152	0.0001523	63	94	12	125
153	0.0001527	53	90	13	127
154	0.0001559	16	68	11	120
155	0.0001583	21	78	13	135
156	0.0001818	54	87	14	120
157	0.0001933	26	65	10	104
158	0.0001685	24	66	11	108
159	0.0002196	10	55	9	100
160	0.0001569	54	88	10	122
161	0.000156	34	76	17	118
162	0.000157	52	74	12	96
163	0.0001652	24	73	17	122
164	0.0001516	66	100	13	134
165	0.0001717	41	94	15	147
166	0.0001536	67	100	17	133
167	0.0001671	19	64	11	109
168	0.0001592	89	111	13	133
169	0.0001736	10	70	16	130
170	0.0001555	42	79	14	116
171	0.0001604	28	72	12	116
172	0.0001581	40	79	11	118
173	0.0001638	28	69	10	110
174	0.0001624	41	86	11	131
175	0.0001864	40	72	10	104
176	0.0001561	21	63	12	105
177	0.0001551	32	67	12	102
178	0.00027	27	76	14	125
179	0.0001553	47	78	10	109
180	0.0001712	19	78	10	137
181	0.0001567	27	71	12	115
182	0.0001569	13	63	11	113
183	0.0001557	39	84	12	129
184	0.000154	77	100	14	123
185	0.0001605	24	63	11	102
186	0.0001932	31	76	13	121
187	0.0001661	82	116	13	150
188	0.0001646	42	85	14	128
189	0.0001672	49	79	13	109
190	0.0001487	87	111	15	135
191	0.0001531	84	103	10	122
192	0.0001762	12	72	13	132
193	0.0001681	14	65	13	116
194	0.0001643	24	82	12	140
195	0.0001777	56	94	11	132
196	0.0001479	55	88	13	121
197	0.0001598	11	68	18	125
198	0.000219	6	65	13	124
199	0.0001567	4	42	11	80
200	0.0001722	6	70	14	134
201	0.0001719	3	60	11	117
202	0.0001545	50	88	18	126
203	0.0001671	36	71	10	106
204	0.00019	2	69	18	136
205	0.0001584	12	75	19	138
206	0.0001966	5	58	11	111
207	0.0001868	62	92	13	122
208	0.0001613	44	86	13	128
209	0.0001836	14	68	13	122
210	0.0001613	9	67	16	125
211	0.0001715	17	81	16	145
212	0.0001585	19	77	18	135
213	0.0001756	17	78	13	139
214	0.0001714	42	88	17	134
215	0.0001997	16	67	15	118
216	0.0001551	62	95	11	128
217	0.0001552	34	72	12	110
218	0.0001674	26	73	9	120
219	0.0001699	49	80	18	111
220	0.0001664	65	90	13	115
221	0.0001767	20	77	15	134
222	0.0001563	41	74	11	107
223	0.0001576	25	71	14	117
224	0.0001557	49	92	16	135
225	0.0001666	13	88	19	163
226	0.0001526	71	100	12	129
227	0.0001566	22	63	14	104
228	0.0001663	11	76	19	141
229	0.0001698	55	90	13	125
230	0.0001804	24	64	10	104
231	0.0001704	4	69	12	134
232	0.0001876	24	67	11	110
233	0.0003614	32	76	10	120
234	0.0001594	3	58	8	113
235	0.000173	14	67	15	120
236	0.0001624	6	70	18	134
237	0.000166	22	74	17	126
238	0.000159	4	61	12	118
239	0.0001708	25	67	11	109
240	0.0001648	21	88	17	155
241	0.0001568	41	84	11	127
242	0.0001682	17	74	16	131
243	0.0001685	37	80	13	123
244	0.0001702	64	85	17	106
245	0.000157	69	104	13	139
246	0.0001421	57	85	11	113
247	0.0001573	24	79	15	134
248	0.0001583	15	69	11	123
249	0.0002161	34	73	11	112
250	0.0001637	8	52	14	96
251	0.0001633	11	67	16	123
252	0.0002034	34	74	15	114
253	0.0001875	73	107	13	141
254	0.0001517	76	101	11	126
255	0.0001749	70	105	19	140
256	0.0001476	49	69	11	89
257	0.0001643	6	64	11	122
258	0.0001638	47	88	11	129
259	0.0001568	23	66	16	109
260	0.0001586	24	67	18	110
261	0.0001539	26	64	12	102
262	0.0001644	65	89	12	113
263	0.000158	14	69	16	124
264	0.0001615	22	68	14	114
265	0.0001574	66	110	19	154
266	0.0001523	33	67	8	101
267	0.0001575	54	85	10	116
268	0.0001659	28	74	11	120
269	0.0001667	4	73	17	142
270	0.0001554	47	89	12	131
271	0.0001578	32	76	13	120
272	0.0001477	110	126	17	142
273	0.0001568	36	79	11	122
274	0.0001665	14	69	17	124
275	0.00017	43	81	13	119
276	0.0001714	11	83	18	155
277	0.0001726	56	88	12	120
278	0.0001676	16	67	13	118
279	0.000152	61	101	17	141
280	0.0001642	5	71	14	137
281	0.0001504	86	118	19	150
282	0.0001512	75	94	10	113
283	0.0001787	27	76	15	125
284	0.0001572	33	68	12	103
285	0.0001647	22	71	12	120
286	0.0001731	9	77	17	145
287	0.0001517	60	91	14	122
288	0.0001526	68	98	15	128
289	0.0001622	21	51	8	81
290	0.000163	69	116	17	163
291	0.0001696	56	78	13	100
292	0.0001693	12	73	19	134
293	0.0001693	35	69	9	103
294	0.0001646	38	79	14	120
295	0.0001613	20	63	13	106
296	0.0001553	39	77	12	115
297	0.0001988	22	80	16	138
298	0.0001591	1	57	11	113
299	0.0001942	2	64	18	126
300	0.0001564	3	67	19	131
301	0.0001739	12	62	9	112
302	0.0001701	24	63	11	102
303	0.0001604	15	56	14	97
304	0.0001683	5	58	17	111
305	0.000161	8	57	12	106
306	0.0001485	74	91	13	108
307	0.0001708	41	90	16	139
308	0.0001616	16	71	11	126
309	0.0001812	29	81	19	133
310	0.0002142	54	91	11	128
311	0.0001666	9	63	14	117
312	0.0001657	28	72	15	116
313	0.000174	7	67	12	127
314	0.0001818	22	73	10	124
315	0.0001734	8	66	17	124
316	0.0001596	61	92	12	123
317	0.0002224	14	63	12	112
318	0.0001612	66	93	14	120
319	0.0001577	19	75	12	131
320	0.0001535	31	69	17	107
321	0.0001715	86	98	12	110
322	0.0001859	42	70	17	98
323	0.0001479	87	110	13	133
324	0.0001777	11	68	16	125
325	0.0001584	16	73	12	130
326	0.0001616	59	81	15	103
327	0.0001577	34	70	15	106
328	0.000165	20	85	11	150
329	0.0001744	28	76	13	124
330	0.0001564	17	73	14	129
331	0.0001649	14	69	14	124
332	0.0001612	47	85	14	123
333	0.000163	20	67	15	114
334	0.0001615	54	84	11	114
335	0.0001792	19	73	11	127
336	0.0001946	37	71	10	105
337	0.0001767	9	61	14	113
338	0.0001604	11	63	15	115
339	0.0001618	9	63	19	117
340	0.0001523	58	93	19	128
341	0.0001549	8	55	19	102
342	0.0001639	9	72	11	135
343	0.0001547	8	44	10	80
344	0.0001729	27	65	11	103
345	0.0001591	4	66	13	128
346	0.0001705	15	78	12	141
347	0.0001787	14	67	16	120
348	0.0001653	10	69	19	128
349	0.0001884	29	65	10	101
350	0.0001588	43	68	13	93
351	0.000194	3	70	10	137
352	0.0001588	14	68	12	122
353	0.0001566	7	61	11	115
354	0.0001698	58	91	19	124
355	0.0001908	73	99	15	125
356	0.0001905	7	73	13	139
357	0.0001978	57	94	11	131
358	0.0001625	36	95	18	154
359	0.0001606	11	56	10	101
360	0.0001897	32	92	16	152
361	0.0001566	53	91	19	129
362	0.0001581	91	104	15	117
363	0.000152	46	68	12	90
364	0.0001559	30	80	18	130
365	0.0001877	34	72	8	110
366	0.0001641	24	73	19	122
367	0.0001743	28	70	11	112
368	0.0001717	37	85	14	133
369	0.0001616	54	88	13	122
370	0.0001607	4	53	11	102
371	0.0001513	70	101	13	132
372	0.0001616	2	71	17	140
373	0.0001553	70	110	12	150
374	0.0002183	22	80	15	138
375	0.0001661	5	58	7	111
376	0.0001601	26	64	19	102
377	0.0001714	7	55	10	103
378	0.0001731	18	74	11	130
379	0.0002927	68	103	16	138
380	0.0001651	10	70	17	130
381	0.0001641	24	62	13	100
382	0.0001973	42	89	18	136
383	0.00017	9	60	11	111
384	0.0001519	55	86	14	117
385	0.0001795	22	91	14	160
386	0.0001526	37	64	12	91
387	0.0001784	63	104	18	145
388	0.0001659	34	76	13	118
389	0.0001593	6	53	10	100
390	0.0001669	59	91	11	123
391	0.0001655	5	46	6	87
392	0.0001623	12	55	10	98
393	0.0001925	39	83	16	127
394	0.0001602	59	99	19	139
395	0.0001807	25	75	19	125
396	0.0001695	38	77	12	116
397	0.0001577	13	66	11	119
398	0.0001584	62	95	10	128
399	0.0001608	54	101	19	148
400	0.0001628	17	68	19	119
401	0.0001552	39	76	14	113
402	0.0001553	52	86	11	120
403	0.0001787	29	67	12	105
404	0.0001802	27	90	15	153
405	0.0001584	6	47	11	88
406	0.0001676	20	73	11	126
407	0.0001836	21	74	15	127
408	0.0001733	12	82	11	152
409	0.0001992	19	65	13	111
410	0.0001826	34	77	16	120
411	0.0001863	31	63	10	95
412	0.0002038	27	74	17	121
413	0.0001635	27	84	15	141
414	0.0001753	36	83	13	130
415	0.000166	50	88	17	126
416	0.0001662	3	63	16	123
417	0.0001639	20	82	16	144
418	0.0001659	6	61	9	116
419	0.0001703	20	84	16	148
420	0.0001548	13	68	13	123
421	0.000163	52	90	13	128
422	0.0001643	28	68	10	108
423	0.0001556	8	56	12	104
424	0.0001632	17	66	17	115
425	0.0001517	36	75	14	114
426	0.0001758	78	102	13	126
427	0.0001908	7	63	11	119
428	0.0001657	32	84	13	136
429	0.0001761	25	70	14	115
430	0.0001574	62	92	13	122
431	0.0001494	60	83	12	106
432	0.000203	31	75	16	119
433	0.0001557	7	54	9	101
434	0.0001728	1	49	9	97
435	0.0001799	11	66	9	121
436	0.000153	23	68	13	113
437	0.000191	17	73	13	129
438	0.0001749	22	66	14	110
439	0.000162	51	81	12	111
440	0.0001763	21	73	15	125
441	0.0001616	3	64	17	125
442	0.0001659	8	76	19	144
443	0.0001613	20	66	12	112
444	0.0001609	18	63	17	108
445	0.0002042	63	102	12	141
446	0.0001597	6	64	11	122
447	0.000162	7	71	18	135
448	0.0001931	23	87	19	151
449	0.0001553	16	59	13	102
450	0.0001546	36	79	12	122
451	0.0001631	3	53	13	103
452	0.0001645	12	66	10	120
453	0.0001851	42	92	16	142
454	0.0001581	20	70	12	120
455	0.0001684	98	117	12	136
456	0.0001636	84	102	12	120
457	0.0001841	34	83	11	132
458	0.0001538	65	95	13	125
459	0.0001568	54	90	11	126
460	0.000164	0	63	11	126
461	0.0001631	59	100	15	141
462	0.0001541	18	59	10	100
463	0.0001866	2	63	17	124
464	0.0001533	78	105	17	132
465	0.0001559	41	85	10	129
466	0.0001719	28	76	16	124
467	0.0001713	41	88	11	135
468	0.000163	26	87	19	148
469	0.0001795	22	68	8	114
470	0.0001656	19	69	10	119
471	0.0001619	1	52	9	103
472	0.000185	45	82	12	119
473	0.0001651	8	58	13	108
474	0.0001587	13	44	6	75
475	0.0002119	33	73	14	113
476	0.0001661	1	49	11	97
477	0.0001598	24	78	13	132
478	0.0001482	77	100	14	123
479	0.0001621	68	95	15	122
480	0.0001888	79	105	10	131
481	0.0001632	8	67	16	126
482	0.0001686	18	66	13	114
483	0.0001699	26	71	11	116
484	0.0001734	46	89	16	132
485	0.0001817	20	71	11	122
486	0.0001554	54	86	13	118
487	0.0001596	1	65	15	129
488	0.0001698	40	81	15	122
489	0.0001692	13	63	11	113
490	0.0001687	20	77	14	134
491	0.0001688	3	58	12	113
492	0.0001627	52	100	15	148
493	0.0001783	38	79	16	120
494	0.0001687	62	89	11	116
495	0.0001591	9	53	12	97
496	0.0001646	52	94	12	136
497	0.00018	3	63	19	123
498	0.0001553	42	91	18	140
499	0.0001622	3	58	14	113
500	0.0001567	17	60	10	103
501	0.0001651	10	80	19	150
502	0.0001582	36	81	11	126
503	0.0001604	7	54	8	101
504	0.000163	4	68	18	132
505	0.000161	44	83	15	122
506	0.000162	13	58	15	103
507	0.000177	5	62	18	119
508	0.0001626	11	73	18	135
509	0.0001987	69	93	11	117
510	0.0001642	4	60	18	116
511	0.000169	12	86	19	160
512	0.0001542	22	58	7	94
513	0.0001601	10	60	12	110
514	0.0001635	1	47	10	93
515	0.0001526	60	82	11	104
516	0.0001564	73	95	15	117
517	0.0001537	40	77	11	114
518	0.0001685	6	63	13	120
519	0.0001617	8	68	11	128
520	0.0001603	28	67	16	106
521	0.0001805	13	63	16	113
522	0.000178	20	74	15	128
523	0.0001747	9	64	15	119
524	0.0001535	37	74	11	111
525	0.0001615	19	61	16	103
526	0.0001686	89	109	15	129
527	0.0001531	44	81	9	118
528	0.0001684	50	88	18	126
529	0.000156	26	64	8	102
530	0.0001942	6	66	19	126
531	0.0001623	27	74	13	121
532	0.0001695	45	81	13	117
533	0.0001784	28	63	10	98
534	0.0001579	26	66	14	106
535	0.000157	47	86	13	125
536	0.0001631	17	77	19	137
537	0.0001792	25	78	15	131
538	0.0001696	26	63	17	100
539	0.000158	50	91	15	132
540	0.0001742	11	64	13	117
541	0.000163	18	59	8	100
542	0.0001639	1	67	18	133
543	0.0001655	22	76	10	130
544	0.0001868	18	72	13	126
545	0.0001477	73	96	13	119
546	0.0001573	45	87	17	129
547	0.0001461	64	84	10	104
548	0.0001638	3	64	11	125
549	0.000163	58	89	12	120
550	0.0001596	1	63	14	125
551	0.0001548	31	81	10	131
552	0.0001641	4	61	10	118
553	0.0001762	49	91	11	133
554	0.0001496	95	120	16	145
555	0.000153	33	67	13	101
556	0.0001554	22	74	17	126
557	0.0001996	23	73	19	123
558	0.0001563	15	61	13	107
559	0.0001573	44	85	15	126
560	0.0001573	1	59	11	117
561	0.0001625	24	65	12	106
562	0.0001548	16	50	9	84
563	0.0001671	19	70	10	121
564	0.0001634	9	52	13	95
565	0.0001572	13	54	9	95
566	0.0001599	43	88	11	133
567	0.0001682	32	76	11	120
568	0.0001683	33	76	15	119
569	0.0001563	49	88	15	127
570	0.0001536	32	85	12	138
571	0.0001586	26	66	12	106
572	0.0001512	51	87	10	123
573	0.0001509	48	79	13	110
574	0.0001631	11	61	10	111
575	0.0001627	8	58	13	108
576	0.000194	49	77	16	105
577	0.000149	53	76	9	99
578	0.0001576	3	49	9	95
579	0.0001722	3	48	10	93
580	0.0001588	52	98	19	144
581	0.00016	69	103	12	137
582	0.0001587	28	80	13	132
583	0.0001583	17	57	9	97
584	0.0001591	28	83	17	138
585	0.0001564	20	74	18	128
586	0.0001731	28	76	18	124
587	0.0001581	30	76	17	122
588	0.0001521	79	102	13	125
589	0.0001654	22	73	10	124
590	0.0001535	20	75	17	130
591	0.0001554	22	71	14	120
592	0.0001612	87	107	12	127
593	0.0001646	6	49	9	92
594	0.0001624	39	71	10	103
595	0.0001751	13	67	15	121
596	0.0001571	61	89	13	117
597	0.0001691	2	76	19	150
598	0.0002056	50	79	13	108
599	0.0001868	72	103	18	134
600	0.000158	0	48	11	96
601	0.0001556	15	63	13	111
602	0.0001611	19	61	9	103
603	0.0001614	28	68	10	108
604	0.0001718	53	83	15	113
605	0.0001633	55	91	13	127
606	0.0001548	60	97	13	134
607	0.0001492	96	117	15	138
608	0.0001577	22	64	12	106
609	0.0001569	25	72	12	119
610	0.0001554	1	52	10	103
611	0.0001557	41	73	9	105
612	0.0001735	3	62	11	121
613	0.0001602	5	60	11	115
614	0.0001609	3	62	13	121
615	0.0001721	7	57	10	107
616	0.0001572	27	74	9	121
617	0.0001556	38	74	10	110
618	0.0001718	6	49	9	92
619	0.000153	51	83	9	115
620	0.0001494	76	95	16	114
621	0.0001634	12	55	10	98
622	0.0001837	32	72	13	112
623	0.0001621	10	70	13	130
624	0.0001552	29	68	11	107
625	0.0001887	57	94	16	131
626	0.0001666	14	69	15	124
627	0.0001539	46	95	18	144
628	0.0001545	50	82	13	114
629	0.0001754	17	50	10	83
630	0.0001763	51	72	12	93
631	0.0001717	0	65	18	130
632	0.0001707	23	60	17	97
633	0.0001519	45	77	12	109
634	0.0001726	24	76	12	128
635	0.0001595	16	59	15	102
636	0.0001606	10	54	9	98
637	0.0001716	7	78	19	149
638	0.0001566	34	75	13	116
639	0.0001619	25	69	12	113
640	0.0001739	33	89	17	145
641	0.0001576	22	60	13	98
642	0.0001679	14	55	12	96
643	0.000159	17	64	8	111
644	0.0001657	76	97	16	118
645	0.000149	23	59	9	95
646	0.0001632	44	77	14	110
647	0.0001693	7	53	9	99
648	0.0001639	8	53	11	98
649	0.0001578	3	57	10	111
650	0.0001582	41	87	19	133
651	0.000158	17	77	17	137
652	0.000154	36	75	13	114
653	0.0001633	65	97	14	129
654	0.0001523	40	75	11	110
655	0.000167	35	70	12	105
656	0.0002015	13	63	16	113
657	0.0001548	18	62	15	106
658	0.0001662	24	70	12	116
659	0.0001574	5	66	11	127
660	0.0001687	12	72	18	132
661	0.0001683	41	89	16	137
662	0.0001689	21	62	10	103
663	0.0001635	97	113	12	129
664	0.0001605	46	82	15	118
665	0.0001534	53	87	12	121
666	0.0001575	53	93	18	133
667	0.0001591	49	84	16	119
668	0.0001559	35	76	15	117
669	0.0001679	47	91	18	135
670	0.000163	48	77	11	106
671	0.0001614	30	67	13	104
672	0.0001552	13	53	8	93
673	0.0001899	66	112	17	158
674	0.0001505	36	80	19	124
675	0.0001782	11	77	15	143
676	0.0001614	24	65	10	106
677	0.0002728	36	77	11	118
678	0.0001573	37	79	12	121
679	0.0001679	21	65	13	109
680	0.0001835	39	87	13	135
681	0.0001611	30	83	16	136
682	0.0001562	12	64	13	116
683	0.000168	54	91	13	128
684	0.000165	44	100	18	156
685	0.0001767	24	95	19	166
686	0.0001755	55	97	18	139
687	0.0001656	92	114	16	136
688	0.0002071	12	65	13	118
689	0.0001569	11	65	12	119
690	0.0001649	5	58	16	111
691	0.0001606	33	92	14	151
692	0.0001723	5	63	13	121
693	0.0002261	28	80	15	132
694	0.0001644	20	76	11	132
695	0.0001525	112	133	12	154
696	0.0001775	21	76	15	131
697	0.0001589	36	85	10	134
698	0.0001812	40	80	12	120
699	0.0001663	5	55	13	105
700	0.0001609	25	68	16	111
701	0.0001529	51	79	12	107
702	0.0001661	16	68	11	120
703	0.0001569	10	65	17	120
704	0.0001706	32	70	11	108
705	0.0001627	29	75	10	121
706	0.0001598	14	58	10	102
707	0.0001657	2	50	15	98
708	0.0001595	41	72	19	103
709	0.0001597	16	67	14	118
710	0.0001648	53	77	16	101
711	0.0001777	23	69	13	115
712	0.000173	7	70	18	133
713	0.000166	29	77	19	125
714	0.0001949	4	56	10	108
715	0.0001524	51	90	12	129
716	0.0001619	20	72	16	124
717	0.0001654	16	66	13	116
718	0.0001972	56	91	10	126
719	0.0001816	36	84	11	132
720	0.0001622	19	78	17	137
721	0.0001969	30	74	12	118
722	0.0001514	15	61	11	107
723	0.0001624	25	79	18	133
724	0.0001609	0	49	13	98
725	0.0001759	6	63	13	120
726	0.0001553	53	83	14	113
727	0.000196	50	90	13	130
728	0.0001649	13	58	11	103
729	0.000152	36	79	12	122
730	0.0001554	39	80	13	121
731	0.0001485	48	78	12	108
732	0.0001779	28	84	13	140
733	0.0001653	21	63	9	105
734	0.0001675	22	60	9	98
735	0.0001627	24	64	10	104
736	0.0001579	31	75	12	119
737	0.0001647	24	66	10	108
738	0.0001804	75	115	14	155
739	0.0001503	86	111	14	136
740	0.0001522	92	111	14	130
741	0.0001602	32	74	10	116
742	0.0001598	5	60	11	115
743	0.0001553	40	80	10	120
744	0.000203	14	73	10	132
745	0.0001549	40	84	13	128
746	0.0001779	36	81	15	126
747	0.0001581	11	71	12	131
748	0.0001628	48	69	10	90
749	0.000156	63	95	13	127
750	0.0001719	24	62	10	100
751	0.0001581	45	78	13	111
752	0.0001712	43	85	14	127
753	0.000166	16	68	17	120
754	0.0001688	30	73	12	116
755	0.0001636	49	91	16	133
756	0.0002034	20	69	19	118
757	0.0001638	29	70	16	111
758	0.0001752	56	88	9	120
759	0.0001615	24	74	15	124
760	0.0001589	2	68	16	134
761	0.000149	29	55	9	81
762	0.0001589	21	79	19	137
763	0.0001603	19	70	10	121
764	0.0001545	2	58	11	114
765	0.0001528	38	76	13	114
766	0.0001728	3	69	13	135
767	0.0001692	66	95	13	124
768	0.0001576	10	66	18	122
769	0.0001547	20	65	11	110
770	0.0001595	51	108	17	165
771	0.0001578	124	150	15	176
772	0.0001722	35	87	19	139
773	0.0001684	12	59	9	106
774	0.000183	40	75	18	110
775	0.0001536	45	87	11	129
776	0.0001842	19	55	11	91
777	0.0001567	3	57	16	111
778	0.0001639	19	59	11	99
779	0.0001711	65	100	13	135
780	0.0001742	23	68	16	113
781	0.0001549	18	71	13	124
782	0.0001667	24	76	14	128
783	0.0001565	19	64	8	109
784	0.0001518	66	87	13	108
785	0.0001694	14	74	19	134
786	0.0001546	3	55	12	107
787	0.0001633	18	66	14	114
788	0.0001535	14	57	14	100
789	0.0001643	30	81	19	132
790	0.000173	40	80	11	120
791	0.0001554	19	69	19	119
792	0.0001562	23	73	16	123
793	0.0001603	50	101	18	152
794	0.0001647	13	54	9	95
795	0.0001583	25	77	19	129
796	0.0001673	13	63	17	113
797	0.0001669	69	109	14	149
798	0.000168	63	96	16	129
799	0.0001514	31	67	14	103
800	0.0001741	55	89	14	123
801	0.0001525	29	68	18	107
802	0.000171	2	56	12	110
803	0.0001558	41	82	11	123
804	0.0001723	24	79	12	134
805	0.0001692	14	72	12	130
806	0.0001553	7	60	12	113
807	0.000156	30	64	12	98
808	0.0001713	29	80	17	131
809	0.0001544	43	88	14	133
810	0.000165	42	82	11	122
811	0.0001507	71	105	14	139
812	0.000159	21	65	12	109
813	0.0001622	17	59	12	101
814	0.000174	31	73	10	115
815	0.0001591	39	69	10	99
816	0.0001643	2	65	12	128
817	0.0001719	39	89	14	139
818	0.0001637	3	55	13	107
819	0.0001706	40	83	11	126
820	0.0001568	45	83	16	121
821	0.0001634	4	65	10	126
822	0.0002223	14	87	18	160
823	0.0001639	35	95	19	155
824	0.0001527	17	63	10	109
825	0.0001686	37	78	12	119
826	0.0001866	26	70	10	114
827	0.0001685	3	63	12	123
828	0.0001641	70	105	13	140
829	0.0001723	4	74	16	144
830	0.000169	11	70	14	129
831	0.0001609	60	113	18	166
832	0.0001713	20	73	16	126
833	0.0001822	47	92	15	137
834	0.0002044	31	75	11	119
835	0.0001615	30	68	13	106
836	0.0001583	2	52	10	102
837	0.0001611	17	60	17	103
838	0.0001629	19	81	19	143
839	0.0001777	7	59	16	111
840	0.0001617	16	62	10	108
841	0.0001627	1	62	16	123
842	0.0001637	23	69	12	115
843	0.0001563	5	58	9	111
844	0.0001687	9	64	11	119
845	0.0001564	13	68	18	123
846	0.00015	47	79	18	111
847	0.0001704	62	92	18	122
848	0.0001753	9	60	7	111
849	0.000167	66	99	12	132
850	0.0001637	43	73	11	103
851	0.0001951	76	94	13	112
852	0.0001561	17	52	7	87
853	0.0001694	16	69	12	122
854	0.000146	85	97	15	109
855	0.0001892	3	56	16	109
856	0.0001717	21	79	14	137
857	0.0001521	92	110	15	128
858	0.000184	9	60	8	111
859	0.0001599	17	67	8	117
860	0.0001555	33	78	9	123
861	0.0001598	13	67	13	121
862	0.0001656	30	71	11	112
863	0.0001841	9	55	11	101
864	0.0001552	16	67	12	118
865	0.0001676	58	92	10	126
866	0.0001592	29	81	18	133
867	0.0001604	19	70	19	121
868	0.0001556	9	62	19	115
869	0.0001498	62	92	16	122
870	0.0001602	77	101	12	125
871	0.000164	25	76	16	127
872	0.0001602	76	102	14	128
873	0.0001809	17	76	14	135
874	0.0001595	17	71	15	125
875	0.0002184	8	64	11	120
876	0.0001662	44	93	12	142
877	0.0001735	3	64	13	125
878	0.0001676	8	59	11	110
879	0.0001536	57	87	13	117
880	0.0001595	14	71	15	128
881	0.0001526	45	68	10	91
882	0.0001608	13	67	10	121
883	0.000181	27	85	9	143
884	0.0001839	30	79	12	128
885	0.0001717	15	61	9	107
886	0.0001642	8	68	14	128
887	0.0001633	12	60	12	108
888	0.0001611	19	68	10	117
889	0.0001499	20	65	9	110
890	0.0001659	7	61	15	115
891	0.0001846	60	91	13	122
892	0.0001724	9	69	18	129
893	0.000159	13	60	10	107
894	0.0001599	1	57	13	113
895	0.0001496	81	100	15	119
896	0.0001538	18	58	12	98
897	0.0001762	26	73	17	120
898	0.0001529	25	66	11	107
899	0.0001623	15	74	13	133
900	0.000168	31	76	9	121
901	0.0001581	52	81	10	110
902	0.0001562	55	98	13	141
903	0.0001635	52	93	12	134
904	0.0001768	15	74	16	133
905	0.0001626	21	68	15	115
906	0.0001696	10	61	19	112
907	0.000158	55	90	11	125
908	0.0001673	14	66	13	118
909	0.0001728	14	64	13	114
910	0.0001768	4	62	12	120
911	0.0001705	9	59	9	109
912	0.0001584	28	71	13	114
913	0.0001589	14	71	17	128
914	0.0001607	26	75	14	124
915	0.0001613	1	60	10	119
916	0.0001536	26	71	10	116
917	0.0001999	54	91	14	128
918	0.0001549	19	63	13	107
919	0.0001597	38	84	13	130
920	0.0001992	27	78	13	129
921	0.0001621	9	63	19	117
922	0.0001528	34	70	10	106
923	0.0001582	39	86	12	133
924	0.0001722	14	74	16	134
925	0.000158	2	57	13	112
926	0.0001855	17	66	15	115
927	0.0001585	36	72	11	108
928	0.0001795	7	54	9	101
929	0.00017	9	54	10	99
930	0.0001621	4	62	9	120
931	0.0001598	45	84	11	123
932	0.0001684	0	51	10	102
933	0.0001582	45	74	10	103
934	0.0001555	53	87	12	121
935	0.0001696	6	64	15	122
936	0.0001617	6	74	17	142
937	0.0001556	39	80	15	121
938	0.0001706	38	81	13	124
939	0.0001619	24	69	14	114
940	0.000161	41	73	9	105
941	0.0001537	36	74	14	112
942	0.0001656	47	90	13	133
943	0.0001933	15	62	12	109
944	0.0001896	37	78	11	119
945	0.0001734	10	63	10	116
946	0.0001472	69	86	11	103
947	0.0001642	93	114	15	135
948	0.0001564	48	81	11	114
949	0.000174	20	71	10	122
950	0.0001774	52	94	13	136
951	0.0001697	6	56	10	106
952	0.0001478	65	95	11	125
953	0.0001658	7	65	19	123
954	0.0001512	54	82	11	110
955	0.0001845	17	61	12	105
956	0.000161	5	60	10	115
957	0.000155	19	51	14	83
958	0.0001634	3	50	11	97
959	0.0001681	34	62	12	90
960	0.0001551	55	82	12	109
961	0.0001543	73	103	17	133
962	0.0001654	9	69	16	129
963	0.0001752	18	66	12	114
964	0.0001768	53	87	13	121
965	0.0001532	59	97	11	135
966	0.0001549	57	90	10	123
967	0.0001667	22	70	11	118
968	0.0001665	5	56	9	107
969	0.0001572	21	59	9	97
970	0.0001508	27	59	9	91
971	0.0001958	26	64	11	102
972	0.0001823	8	60	9	112
973	0.0001548	47	76	10	105
974	0.0001544	39	73	13	107
975	0.0001592	2	67	13	132
976	0.0001567	42	88	16	134
977	0.0001626	1	57	11	113
978	0.0001546	26	69	8	112
979	0.0001483	72	102	13	132
980	0.0001552	41	83	12	125
981	0.0001553	45	83	16	121
982	0.000151	40	80	13	120
983	0.0001556	49	84	12	119
984	0.0001741	43	77	13	111
985	0.0001641	19	64	9	109
986	0.0001816	3	74	19	145
987	0.0001537	37	79	13	121
988	0.0001502	48	87	13	126
989	0.0001599	14	73	10	132
990	0.0001573	5	60	11	115
991	0.0001596	5	60	11	115
992	0.0001742	15	68	14	121
993	0.0001708	23	70	12	117
994	0.0001554	25	66	12	107
995	0.0001688	1	50	10	99
996	0.0001508	70	101	12	132
997	0.0001557	38	82	12	126
998	0.0001618	34	84	13	134
999	0.0001579	17	60	11	103
mean	0.000166903	30.316	74.752	13.162	119.188

## Sheet: GS_Opt
	time	SEq	Bal	Reg	Egal
0	0.000338	34	74	8	114
1	0.0003142	39	76	16	113
2	0.0003307	32	71	12	110
3	0.000309	26	80	13	134
4	0.000348	12	58	11	104
5	0.000333	7	60	10	113
6	0.000326	9	56	11	103
7	0.0003176	69	99	9	121
8	0.0003412	43	79	15	115
9	0.0003536	4	61	11	118
10	0.0003643	14	56	8	98
11	0.0003339	18	64	11	110
12	0.0003299	19	68	10	117
13	0.0003552	13	69	14	125
14	0.0003433	43	71	10	99
15	0.000331	21	66	10	110
16	0.0003409	3	53	12	93
17	0.0003308	2	61	9	120
18	0.0003503	19	55	10	91
19	0.0003281	50	74	11	98
20	0.0003476	5	53	16	101
21	0.0003352	12	55	11	98
22	0.0003276	7	53	17	99
23	0.0003229	12	65	11	118
24	0.000347	7	61	12	115
25	0.0003857	28	68	10	108
26	0.0003336	17	69	11	111
27	0.0003108	5	44	8	83
28	0.0003214	13	59	9	105
29	0.0003192	43	88	14	133
30	0.0003369	28	71	18	114
31	0.0003363	11	65	11	119
32	0.0003847	9	56	8	103
33	0.0003373	9	66	18	123
34	0.0003213	31	69	10	107
35	0.0003322	29	77	10	125
36	0.0003307	26	77	14	128
37	0.0003467	10	65	15	117
38	0.0003235	14	69	12	124
39	0.0003645	12	68	14	124
40	0.0003007	16	61	9	105
41	0.0003186	20	71	12	115
42	0.0003258	1	47	15	92
43	0.000318	58	81	12	104
44	0.0003633	7	60	9	113
45	0.0003358	5	42	8	79
46	0.0003302	52	91	13	130
47	0.0003443	17	69	16	121
48	0.000324	16	72	17	128
49	0.0003329	16	67	12	118
50	0.0003295	33	68	11	103
51	0.0003167	29	75	13	114
52	0.000352	74	99	11	124
53	0.0003376	10	74	12	138
54	0.0003154	15	48	11	77
55	0.0003175	4	48	7	92
56	0.0003374	40	79	16	118
57	0.0003852	25	80	16	135
58	0.0003111	15	48	8	81
59	0.0003107	3	61	10	110
60	0.0003138	28	69	8	110
61	0.0003187	3	50	10	97
62	0.0003217	16	63	11	110
63	0.000311	52	90	11	128
64	0.0003267	6	67	12	128
65	0.0003603	2	60	15	118
66	0.000326	8	53	13	98
67	0.0003479	9	65	19	121
68	0.0003456	2	55	13	108
69	0.0003255	30	74	19	118
70	0.0003847	6	74	19	142
71	0.0003261	24	75	19	126
72	0.0003451	4	67	14	127
73	0.0003067	28	58	10	88
74	0.0003036	5	68	16	131
75	0.0003146	11	63	19	115
76	0.0003785	25	80	14	135
77	0.0003683	10	59	11	108
78	0.0003166	26	77	13	116
79	0.0003273	12	68	13	124
80	0.0003058	17	60	11	103
81	0.0003107	7	47	10	87
82	0.0003923	59	78	11	97
83	0.000322	1	43	12	85
84	0.000315	7	58	9	109
85	0.0003227	3	62	13	121
86	0.0003157	16	68	13	120
87	0.0003274	17	54	7	91
88	0.0003575	16	54	10	92
89	0.0003241	18	66	10	114
90	0.0003215	35	73	16	111
91	0.0003769	14	66	14	112
92	0.0003379	10	55	8	100
93	0.0003285	3	55	10	107
94	0.0003211	37	64	14	91
95	0.00032	2	51	11	100
96	0.0003106	16	69	10	122
97	0.0003032	34	70	12	106
98	0.0003729	28	76	13	124
99	0.000309	9	52	10	95
100	0.0003324	29	79	10	117
101	0.000354	4	59	10	110
102	0.0003187	3	57	11	111
103	0.0003382	1	49	7	97
104	0.0003528	21	73	19	125
105	0.000316	62	111	18	144
106	0.000303	30	69	16	108
107	0.0003153	35	79	13	123
108	0.0003369	13	67	19	120
109	0.0003189	7	62	12	117
110	0.0003206	13	58	11	103
111	0.0004327	7	61	16	115
112	0.0003253	27	57	11	87
113	0.0003277	8	53	9	98
114	0.0003861	15	82	18	149
115	0.0003553	33	65	8	97
116	0.0003638	38	83	10	128
117	0.0003465	13	58	9	103
118	0.0003183	30	69	10	108
119	0.0003231	18	57	8	96
120	0.000326	10	64	12	118
121	0.0003187	9	62	10	115
122	0.0003498	15	61	8	107
123	0.0003555	36	75	13	114
124	0.0003216	20	67	11	114
125	0.0003267	1	68	12	129
126	0.0003249	37	80	13	123
127	0.0003235	29	68	12	99
128	0.0003345	25	81	17	137
129	0.0003456	10	61	11	112
130	0.0005632	24	79	18	130
131	0.0003347	4	72	11	140
132	0.0003228	5	57	12	109
133	0.0003685	77	110	17	143
134	0.0003233	8	58	11	108
135	0.0003221	11	60	9	108
136	0.0003413	46	91	14	136
137	0.0003228	8	54	12	100
138	0.0003232	24	76	18	128
139	0.0003532	31	78	8	120
140	0.0003541	36	75	13	106
141	0.0003324	36	78	12	112
142	0.0003768	11	67	12	118
143	0.0003144	42	81	12	120
144	0.0003462	9	69	10	128
145	0.0003123	31	69	12	107
146	0.0003475	36	68	11	98
147	0.0003376	3	54	10	105
148	0.0003213	28	74	9	118
149	0.0005444	3	60	12	117
150	0.0003175	4	67	18	129
151	0.0003318	2	57	17	112
152	0.0003198	10	69	12	125
153	0.0003171	14	66	11	118
154	0.0003518	16	68	11	120
155	0.0003161	21	78	10	135
156	0.0003308	54	87	14	120
157	0.0003535	26	65	10	104
158	0.0003428	4	53	11	102
159	0.0003794	10	55	9	100
160	0.0003059	54	88	10	122
161	0.0003343	4	58	17	112
162	0.0003152	2	43	10	84
163	0.0003244	24	73	17	122
164	0.0003192	21	69	13	117
165	0.0003413	41	94	15	147
166	0.0003373	37	78	13	119
167	0.0003566	19	64	11	109
168	0.0003138	8	65	11	122
169	0.0003329	10	70	11	130
170	0.0003146	42	79	14	116
171	0.0003294	15	66	10	116
172	0.0003212	14	68	10	118
173	0.0003187	28	69	10	101
174	0.0003246	3	65	11	127
175	0.0003441	38	72	10	104
176	0.0003097	21	63	12	105
177	0.0003354	4	45	12	86
178	0.000438	2	63	12	124
179	0.0003117	29	78	10	109
180	0.0003244	19	78	10	128
181	0.0003585	27	71	12	115
182	0.000316	13	63	11	113
183	0.000315	39	84	12	122
184	0.0003368	32	71	12	110
185	0.0003126	24	63	11	102
186	0.0003614	31	76	13	121
187	0.0003268	20	77	10	134
188	0.0003341	23	77	11	128
189	0.0003574	12	56	11	100
190	0.0003188	51	84	11	117
191	0.0003281	7	58	9	109
192	0.0003403	0	65	13	130
193	0.0003286	14	64	9	105
194	0.0003186	22	79	12	136
195	0.0003414	7	63	11	119
196	0.0003044	42	77	11	112
197	0.0003218	11	68	18	125
198	0.0003693	6	65	13	124
199	0.0003102	4	42	11	80
200	0.0003427	6	70	14	134
201	0.0003279	3	60	11	117
202	0.0003655	31	72	18	113
203	0.0003571	30	68	9	106
204	0.0003612	2	69	18	136
205	0.0003472	0	67	19	134
206	0.0003705	5	58	11	107
207	0.0003658	32	73	11	114
208	0.0003187	44	86	13	128
209	0.0003501	14	68	13	122
210	0.000322	9	67	16	125
211	0.0003318	17	81	16	145
212	0.0003334	19	77	18	135
213	0.0003479	17	78	13	139
214	0.0003314	42	88	17	134
215	0.0003761	16	67	15	118
216	0.0003511	38	86	11	128
217	0.0003104	21	62	9	103
218	0.000332	26	67	9	106
219	0.0003473	49	80	18	111
220	0.0003616	16	68	13	115
221	0.0003302	20	77	15	133
222	0.0003069	36	66	11	96
223	0.0003811	24	70	14	116
224	0.0003112	20	66	11	112
225	0.000337	13	88	19	163
226	0.0003069	15	63	10	111
227	0.0003119	22	63	10	101
228	0.0003616	10	76	19	141
229	0.0003302	17	69	10	121
230	0.0003424	24	64	10	104
231	0.000327	4	69	12	134
232	0.0003391	24	67	11	110
233	0.000517	32	73	10	114
234	0.0003212	3	58	8	113
235	0.0003368	14	67	15	120
236	0.0003182	6	70	12	116
237	0.000337	22	74	17	126
238	0.0003216	4	61	12	118
239	0.0003315	14	59	10	104
240	0.0003684	21	88	17	155
241	0.0003233	8	63	9	118
242	0.0003297	17	74	16	131
243	0.0003411	18	76	13	123
244	0.000339	25	65	11	105
245	0.0003206	16	65	12	114
246	0.0003019	8	61	11	113
247	0.0003193	24	79	12	134
248	0.0003376	15	69	11	123
249	0.000379	24	73	11	112
250	0.0003191	8	52	14	96
251	0.0003285	11	67	16	123
252	0.0003711	34	74	15	114
253	0.0003482	8	64	10	120
254	0.0003147	76	101	11	126
255	0.0003366	70	105	19	140
256	0.0003159	1	47	8	89
257	0.0003333	6	64	11	122
258	0.0003273	26	72	11	118
259	0.0003168	5	57	12	109
260	0.00033	18	67	17	110
261	0.0003037	26	64	12	102
262	0.000351	65	89	12	113
263	0.0003092	14	69	16	112
264	0.000315	22	68	12	114
265	0.0003364	66	110	19	154
266	0.000317	18	63	8	101
267	0.0003161	17	69	10	116
268	0.0003279	28	74	11	114
269	0.0003574	4	73	17	142
270	0.0003175	20	71	12	122
271	0.0003267	32	76	13	120
272	0.0003085	7	64	12	121
273	0.0003172	34	79	11	122
274	0.0003296	0	60	17	120
275	0.0003201	43	81	13	119
276	0.0003433	11	83	18	155
277	0.0003184	56	88	12	120
278	0.0003223	11	63	13	115
279	0.0003207	0	71	17	141
280	0.0003286	5	71	14	123
281	0.0003206	27	87	12	147
282	0.0003389	12	51	10	90
283	0.0003276	27	76	15	125
284	0.0003098	33	68	9	103
285	0.0003286	22	71	12	120
286	0.0003348	9	77	17	145
287	0.0003076	60	91	11	122
288	0.0003104	66	92	15	118
289	0.0003097	21	51	8	81
290	0.0003448	69	116	17	163
291	0.0003159	56	78	13	100
292	0.0003485	12	73	19	134
293	0.0003315	35	69	9	103
294	0.0003258	23	71	14	119
295	0.0003261	20	63	13	106
296	0.0003112	0	57	12	114
297	0.0003651	22	80	16	138
298	0.0003119	1	57	11	113
299	0.0003649	2	64	18	126
300	0.0003166	3	67	19	131
301	0.0003332	12	62	9	112
302	0.0003309	24	63	11	102
303	0.0003179	15	56	14	97
304	0.000326	5	58	17	111
305	0.0003213	6	57	12	106
306	0.0002981	38	73	10	108
307	0.0003638	41	90	16	139
308	0.0003173	7	64	11	121
309	0.0003298	29	81	12	132
310	0.0003823	22	73	9	124
311	0.000323	9	63	14	117
312	0.0003132	28	72	15	116
313	0.0003335	7	67	12	127
314	0.0003416	3	65	10	124
315	0.0003506	8	66	17	124
316	0.000321	34	75	12	116
317	0.000389	14	63	12	112
318	0.0003221	11	55	10	99
319	0.0003546	19	75	12	131
320	0.0003385	31	69	17	107
321	0.0003488	18	61	9	104
322	0.0003407	42	70	17	97
323	0.0003959	15	64	13	113
324	0.0003439	11	68	14	120
325	0.0003061	16	73	12	130
326	0.0003442	27	65	15	103
327	0.0003169	6	60	15	106
328	0.000319	20	85	11	136
329	0.0003413	28	76	13	124
330	0.0003273	17	73	14	129
331	0.0003732	14	69	14	124
332	0.0003376	47	85	14	123
333	0.0003201	20	67	15	114
334	0.0003168	50	83	11	114
335	0.0003322	19	73	11	127
336	0.0003498	37	71	10	105
337	0.0003371	9	61	14	113
338	0.0003669	11	63	9	115
339	0.0003165	9	63	19	115
340	0.0003148	5	57	7	109
341	0.0003136	8	55	19	102
342	0.0003236	9	72	11	135
343	0.0003126	8	44	10	80
344	0.0003399	2	50	11	98
345	0.0003253	4	66	13	126
346	0.0003348	15	78	11	137
347	0.000341	14	67	16	117
348	0.0003378	10	69	19	128
349	0.0003684	6	49	10	92
350	0.000317	15	55	10	93
351	0.0003451	3	70	9	123
352	0.0003078	14	68	12	122
353	0.0003561	7	61	11	115
354	0.0003267	38	69	10	100
355	0.0003541	18	65	9	112
356	0.00035	7	69	13	131
357	0.0003707	1	69	11	131
358	0.0003298	23	87	18	151
359	0.0003246	11	56	9	98
360	0.0003496	32	92	16	152
361	0.0003061	53	91	11	126
362	0.000328	83	100	15	117
363	0.0003046	2	40	11	78
364	0.0003205	25	78	18	130
365	0.0003376	34	72	8	110
366	0.000319	24	73	19	122
367	0.0003259	28	70	11	112
368	0.0003188	37	85	14	133
369	0.0003269	19	61	11	103
370	0.0003664	4	53	11	102
371	0.0003216	21	79	13	132
372	0.0003337	2	71	17	140
373	0.0003422	70	110	12	150
374	0.0003797	22	80	15	135
375	0.0003241	5	58	7	111
376	0.0003159	3	53	19	102
377	0.0003281	7	55	10	103
378	0.0003341	18	74	11	130
379	0.0004566	2	65	11	128
380	0.000349	10	70	17	130
381	0.0003185	8	52	13	96
382	0.0003496	42	89	18	136
383	0.0003561	9	60	9	105
384	0.0003065	40	75	14	110
385	0.0003552	22	91	14	160
386	0.0003584	6	53	12	91
387	0.0003306	57	92	10	127
388	0.0003226	14	65	13	116
389	0.0003088	6	53	10	100
390	0.0003397	49	85	11	121
391	0.0003205	5	46	6	87
392	0.0003196	0	51	9	98
393	0.0003651	39	83	16	127
394	0.0003226	11	69	13	127
395	0.0003621	25	75	19	125
396	0.0003349	38	77	12	116
397	0.0003299	13	66	11	119
398	0.0003599	48	91	10	128
399	0.0003327	54	101	19	148
400	0.0003487	17	68	19	119
401	0.0003123	4	55	14	106
402	0.0003098	13	61	8	109
403	0.0003556	29	67	12	105
404	0.0003546	17	83	15	149
405	0.0003126	6	47	11	88
406	0.0003287	18	73	11	126
407	0.0003341	21	74	13	127
408	0.000349	12	82	11	152
409	0.0004043	19	65	13	111
410	0.0003333	34	77	16	120
411	0.000345	1	48	10	95
412	0.0003964	27	74	17	121
413	0.0003418	4	74	15	141
414	0.0003558	36	83	13	130
415	0.0003371	23	75	17	126
416	0.0003378	3	63	16	122
417	0.0003561	5	76	16	144
418	0.0003265	6	61	9	116
419	0.0003277	20	84	15	137
420	0.0003215	13	68	11	123
421	0.0003176	52	90	10	123
422	0.0003253	28	68	10	108
423	0.0003088	8	56	11	104
424	0.0003224	15	66	15	115
425	0.0003263	7	61	12	114
426	0.0003521	0	63	13	126
427	0.000348	7	63	11	119
428	0.0003219	32	84	11	135
429	0.000348	25	70	14	115
430	0.0003199	30	71	9	112
431	0.0003085	7	54	9	101
432	0.0003694	31	75	16	119
433	0.0003174	7	54	9	98
434	0.0003488	1	49	9	97
435	0.0003375	11	66	9	121
436	0.0003106	1	59	13	113
437	0.0003454	17	73	11	125
438	0.0003512	22	66	14	110
439	0.0004132	44	81	12	111
440	0.0003359	21	73	15	125
441	0.0003583	3	64	17	125
442	0.0003314	8	76	13	144
443	0.0003296	20	66	12	112
444	0.0003262	18	63	17	108
445	0.0003963	19	82	12	141
446	0.0003228	6	64	11	122
447	0.0003321	7	71	18	135
448	0.0003602	23	87	19	151
449	0.0003253	16	59	13	102
450	0.0003133	8	67	12	122
451	0.0003361	3	53	9	98
452	0.0003242	12	66	10	120
453	0.0003448	42	92	16	138
454	0.0003163	20	70	12	114
455	0.0003469	53	93	12	133
456	0.0003182	25	67	11	109
457	0.0003739	34	83	11	132
458	0.0003196	29	80	13	125
459	0.0004734	54	90	11	116
460	0.0003353	0	63	11	115
461	0.0003211	17	72	15	127
462	0.0003172	18	59	10	100
463	0.0003502	2	63	17	124
464	0.0003063	42	73	14	104
465	0.0003106	41	85	10	129
466	0.0003265	28	76	16	124
467	0.0003372	41	87	11	109
468	0.000335	9	79	19	148
469	0.0003286	22	68	8	114
470	0.0003705	19	69	10	119
471	0.0003197	1	52	9	101
472	0.0003383	45	82	12	119
473	0.0003224	8	58	13	108
474	0.0003213	13	44	6	75
475	0.0003753	22	66	14	110
476	0.0003248	1	49	11	95
477	0.000333	24	78	13	132
478	0.0003009	27	68	10	109
479	0.0003129	35	64	10	93
480	0.0003372	79	105	10	131
481	0.0003321	8	67	16	126
482	0.0003322	18	66	13	114
483	0.0003267	26	71	11	105
484	0.0003395	46	89	16	132
485	0.0003673	20	71	11	122
486	0.0003223	28	70	13	112
487	0.0003491	1	65	15	129
488	0.0003265	40	81	15	122
489	0.0003215	13	63	11	113
490	0.0003342	20	77	14	134
491	0.0003212	3	58	12	113
492	0.0003335	33	94	15	148
493	0.0003537	10	66	16	120
494	0.0003307	62	89	11	116
495	0.0003597	9	53	12	97
496	0.000325	47	89	9	131
497	0.0003393	3	63	19	123
498	0.0003295	42	91	18	140
499	0.0003194	3	58	14	113
500	0.000321	17	60	10	103
501	0.0003477	10	80	19	150
502	0.0003223	14	68	11	122
503	0.0003151	7	54	8	101
504	0.0003413	4	68	18	132
505	0.0003172	29	76	14	122
506	0.000311	13	58	11	93
507	0.0003418	5	62	18	119
508	0.0003223	0	67	18	134
509	0.0003454	69	93	11	117
510	0.0003191	4	60	18	115
511	0.0003446	12	86	19	160
512	0.0003117	22	58	7	94
513	0.0003152	10	60	12	110
514	0.0003212	1	47	10	93
515	0.0003095	20	75	11	104
516	0.0003107	73	95	14	117
517	0.0003158	40	77	11	114
518	0.0003442	6	63	13	120
519	0.0003161	8	68	11	121
520	0.0003219	2	51	10	100
521	0.0003454	13	63	16	113
522	0.0003282	20	74	15	123
523	0.0003507	9	64	15	119
524	0.0003117	25	67	11	109
525	0.0003206	5	56	16	103
526	0.0003384	16	68	15	120
527	0.0003232	27	75	9	118
528	0.0003445	49	80	15	111
529	0.0003273	1	54	8	102
530	0.0003548	6	66	19	126
531	0.0003567	4	60	10	116
532	0.0003376	35	77	13	117
533	0.0003351	10	61	10	98
534	0.0003354	26	66	14	103
535	0.0003373	11	64	10	117
536	0.0003275	2	69	19	136
537	0.0003479	12	71	15	130
538	0.0003228	26	63	17	100
539	0.0003084	50	91	15	132
540	0.0003414	11	64	13	117
541	0.0003147	18	59	8	100
542	0.0003152	1	67	16	133
543	0.0003248	22	76	10	130
544	0.0004038	18	72	13	126
545	0.000301	50	88	13	119
546	0.0003322	6	59	17	112
547	0.0002991	57	84	10	104
548	0.0003148	3	64	11	118
549	0.0003293	3	57	10	111
550	0.0003298	1	63	14	125
551	0.0003461	20	75	10	130
552	0.0003245	4	61	10	118
553	0.0003314	49	91	11	133
554	0.0003135	9	63	16	117
555	0.0003245	14	62	13	101
556	0.0003178	0	62	17	124
557	0.0003504	23	73	10	107
558	0.0003181	15	61	13	107
559	0.0003202	24	68	10	112
560	0.0003288	1	59	11	117
561	0.0003196	17	61	12	105
562	0.0003122	16	50	9	84
563	0.0003267	19	70	10	121
564	0.0003296	9	52	13	95
565	0.0003157	13	54	9	95
566	0.0003187	4	63	10	122
567	0.0003227	32	76	11	120
568	0.0003195	33	76	15	115
569	0.000317	14	62	10	110
570	0.0003206	23	79	12	135
571	0.0003282	26	66	12	106
572	0.0003092	0	62	10	123
573	0.000313	3	48	9	93
574	0.0003189	11	61	10	111
575	0.0003199	8	58	13	108
576	0.0003647	49	77	16	105
577	0.0003052	44	76	9	99
578	0.0003142	3	49	9	95
579	0.0003284	3	48	10	91
580	0.0003245	23	75	12	127
581	0.0003949	22	71	11	120
582	0.0003137	28	80	13	132
583	0.0003094	17	57	9	97
584	0.0003313	20	71	12	122
585	0.0003094	20	74	18	119
586	0.0003381	18	72	18	124
587	0.0003382	30	76	17	122
588	0.000326	14	73	13	125
589	0.0003236	22	73	10	124
590	0.0003192	15	75	17	130
591	0.0003294	4	64	11	120
592	0.0003366	59	94	11	127
593	0.0003212	6	49	9	92
594	0.0003102	39	71	10	103
595	0.0003267	13	67	10	121
596	0.0003298	27	71	12	115
597	0.0003246	2	76	19	150
598	0.0003571	49	76	11	103
599	0.0003508	51	87	12	123
600	0.0003124	0	48	11	96
601	0.0003121	14	60	11	106
602	0.0003162	19	61	9	103
603	0.0003407	20	64	10	108
604	0.000332	53	83	15	113
605	0.0003459	46	89	13	127
606	0.0003486	32	76	10	120
607	0.0003185	25	79	15	133
608	0.0003166	7	54	11	101
609	0.0003092	25	72	12	119
610	0.0003212	1	52	9	103
611	0.0003263	26	63	9	100
612	0.0003371	3	62	11	121
613	0.0003089	5	60	11	115
614	0.0003193	3	62	13	121
615	0.0003287	7	57	10	107
616	0.0003174	13	74	9	121
617	0.0003093	8	56	10	104
618	0.0003292	6	49	9	92
619	0.0003086	51	83	9	115
620	0.0003047	1	48	11	95
621	0.0003161	12	55	10	97
622	0.0003477	20	62	11	104
623	0.0003329	10	70	13	130
624	0.0003269	29	68	11	107
625	0.0003581	12	69	9	126
626	0.0003366	5	65	15	124
627	0.000348	25	76	16	127
628	0.000321	18	68	13	114
629	0.0003402	3	43	10	83
630	0.0003253	51	72	12	93
631	0.0003367	0	65	18	130
632	0.0003253	5	47	17	89
633	0.0003155	45	77	12	109
634	0.000334	24	76	12	128
635	0.0003128	7	59	15	102
636	0.0003477	10	54	9	98
637	0.0003402	7	77	19	144
638	0.0003115	7	59	9	111
639	0.0003325	3	57	12	111
640	0.0003315	33	89	17	143
641	0.0003106	22	60	11	98
642	0.0003354	14	55	12	96
643	0.0003225	17	64	8	111
644	0.0003366	13	51	8	89
645	0.0003195	7	53	9	95
646	0.0003514	16	70	14	110
647	0.0003345	7	53	9	99
648	0.0003257	8	53	11	98
649	0.0003118	3	57	10	111
650	0.0003185	11	67	19	123
651	0.0003113	17	68	17	118
652	0.0003144	21	66	11	111
653	0.000319	9	66	14	123
654	0.0003095	31	75	9	110
655	0.0003152	35	70	12	105
656	0.0003589	13	63	16	113
657	0.0003298	18	62	13	106
658	0.0003358	13	66	12	116
659	0.0003174	5	66	11	127
660	0.0003321	12	72	18	132
661	0.0003457	41	89	16	137
662	0.0003243	2	52	9	102
663	0.000329	8	69	9	129
664	0.0003184	0	52	15	104
665	0.0003201	16	63	12	110
666	0.0003171	9	73	18	133
667	0.0003307	31	76	10	119
668	0.0003133	9	66	15	117
669	0.0003292	25	76	13	127
670	0.0003547	43	76	11	106
671	0.0003309	30	67	13	104
672	0.0003044	13	53	8	93
673	0.0003457	66	112	17	158
674	0.0003343	6	63	19	120
675	0.0003496	11	77	15	143
676	0.0003171	24	65	10	106
677	0.0004643	12	60	11	108
678	0.0003343	12	61	8	110
679	0.0003271	0	49	9	98
680	0.0003337	39	87	13	121
681	0.0003336	26	81	16	136
682	0.0003076	12	63	13	107
683	0.0003435	34	79	10	124
684	0.0003642	23	87	18	151
685	0.0003775	24	95	19	166
686	0.0003701	13	79	18	139
687	0.0003569	64	95	16	126
688	0.000375	12	65	13	117
689	0.0003168	6	65	12	119
690	0.0003236	5	58	16	111
691	0.0003299	17	80	14	143
692	0.0003701	5	63	13	121
693	0.0003906	28	80	15	132
694	0.0003123	20	76	11	120
695	0.0003235	57	94	11	131
696	0.0003447	21	76	15	131
697	0.0003409	24	79	10	134
698	0.0003474	40	80	12	120
699	0.0003297	5	55	8	105
700	0.0003126	25	68	12	111
701	0.0003401	51	79	12	107
702	0.0003611	16	68	11	120
703	0.0003366	10	65	17	120
704	0.0003517	15	64	11	108
705	0.0003148	29	75	10	121
706	0.0003385	14	58	10	102
707	0.0003221	2	50	15	98
708	0.000311	39	72	12	103
709	0.0003207	16	67	10	118
710	0.0003184	35	62	16	89
711	0.0003367	23	69	13	115
712	0.0003452	7	70	18	133
713	0.0003236	29	77	19	125
714	0.000352	4	56	10	108
715	0.0003083	43	82	12	121
716	0.0003287	20	72	16	124
717	0.0003225	16	66	13	116
718	0.0003587	21	80	10	126
719	0.0003378	36	84	11	132
720	0.0003219	8	68	17	128
721	0.0003705	30	74	11	108
722	0.000303	15	61	11	107
723	0.0003296	10	72	18	133
724	0.0003282	0	49	13	98
725	0.0003318	6	63	13	120
726	0.0003162	27	68	12	109
727	0.0003957	31	80	13	129
728	0.0003462	3	51	11	99
729	0.0003107	14	63	10	112
730	0.0003189	39	80	13	121
731	0.0003097	37	66	12	95
732	0.000337	28	84	13	140
733	0.0003887	21	63	9	105
734	0.0003235	22	60	9	98
735	0.0003207	24	64	10	104
736	0.0003317	31	75	12	119
737	0.0003198	24	66	10	108
738	0.0003318	75	115	14	155
739	0.000331	23	69	9	115
740	0.0003384	19	72	14	125
741	0.0003196	6	57	9	108
742	0.000352	5	60	11	115
743	0.0003187	19	69	10	119
744	0.0003624	14	73	10	127
745	0.0003208	28	74	11	120
746	0.0003364	36	81	15	126
747	0.0003145	11	71	12	117
748	0.0003343	17	58	9	90
749	0.0003157	49	88	10	127
750	0.000327	13	57	10	100
751	0.0003221	45	77	11	109
752	0.0003353	13	65	11	117
753	0.0003517	16	68	17	120
754	0.0003243	30	73	12	116
755	0.0003449	30	81	16	132
756	0.0003735	20	69	19	118
757	0.000339	29	70	16	111
758	0.0003393	33	75	9	117
759	0.0003344	24	74	15	124
760	0.0003359	2	68	16	133
761	0.0003067	29	55	9	81
762	0.0003306	21	76	11	120
763	0.0003195	6	68	9	121
764	0.0003055	2	58	11	114
765	0.0003173	38	76	13	114
766	0.0003785	3	69	9	125
767	0.0003507	66	89	11	111
768	0.0003072	10	66	12	105
769	0.0003141	10	61	11	110
770	0.0003184	51	106	17	158
771	0.0003167	14	85	15	156
772	0.0003485	35	87	19	139
773	0.0003225	12	59	9	106
774	0.0003578	11	54	9	97
775	0.0003213	45	87	11	129
776	0.0003362	19	50	11	81
777	0.0003299	3	57	16	110
778	0.0003248	19	59	11	99
779	0.0003449	17	68	9	119
780	0.0003246	23	68	12	113
781	0.0003227	18	71	13	124
782	0.0003286	24	76	14	128
783	0.0003178	1	54	7	107
784	0.0003176	35	66	11	97
785	0.0003327	14	74	19	134
786	0.0003085	3	55	12	107
787	0.0003207	18	66	9	114
788	0.0003097	14	57	14	100
789	0.0003135	30	81	15	123
790	0.0003521	8	61	11	114
791	0.0003294	4	61	19	118
792	0.0003185	14	73	16	123
793	0.0003599	12	69	15	126
794	0.0003192	13	54	9	95
795	0.0003264	25	77	19	129
796	0.0003338	13	63	16	113
797	0.0003245	66	107	14	148
798	0.0003246	7	67	13	127
799	0.0003135	31	67	14	103
800	0.0003407	1	58	14	115
801	0.0003047	13	54	17	95
802	0.0003252	2	56	12	110
803	0.0003304	37	82	11	123
804	0.0003492	24	79	12	134
805	0.0003413	14	72	12	130
806	0.0003068	7	60	12	113
807	0.0003145	30	64	12	98
808	0.0003406	29	75	15	117
809	0.0003212	19	75	12	131
810	0.0003282	1	60	11	119
811	0.0003128	4	65	13	126
812	0.0003208	10	61	12	109
813	0.000321	9	56	10	101
814	0.0003195	31	73	10	115
815	0.0003165	13	51	10	89
816	0.0003514	2	65	11	128
817	0.0003618	39	89	14	139
818	0.0003228	3	55	13	107
819	0.0003306	1	59	11	117
820	0.0003143	6	64	12	121
821	0.0003135	4	65	10	126
822	0.0004026	14	87	18	160
823	0.0003374	35	95	19	155
824	0.0003129	17	63	10	109
825	0.0003552	5	64	12	119
826	0.0003483	16	69	10	114
827	0.00034	3	63	12	123
828	0.0003333	53	91	13	129
829	0.0003288	4	74	16	139
830	0.000331	11	70	12	126
831	0.0003322	1	71	11	141
832	0.0003455	20	73	13	126
833	0.000342	47	92	15	137
834	0.0003627	29	75	11	119
835	0.0003349	6	58	12	106
836	0.0003116	2	52	9	102
837	0.0003323	17	60	17	103
838	0.0003332	19	81	19	143
839	0.0003309	7	59	16	111
840	0.0003192	16	62	10	108
841	0.0003177	1	62	14	123
842	0.0003214	23	69	12	115
843	0.0003215	5	58	9	111
844	0.0003269	9	64	10	119
845	0.0003283	10	64	18	118
846	0.000337	7	65	18	111
847	0.0003254	62	92	18	122
848	0.0003409	9	60	7	111
849	0.0003221	56	99	12	132
850	0.0003269	43	73	11	103
851	0.0003562	45	77	13	109
852	0.0003082	17	52	7	87
853	0.0003629	13	69	12	122
854	0.0003125	26	65	10	104
855	0.0003416	3	56	8	97
856	0.0003795	21	79	14	137
857	0.0003073	56	83	15	110
858	0.0003431	9	60	8	111
859	0.0003222	17	67	8	117
860	0.00032	33	78	9	123
861	0.0003495	13	67	13	121
862	0.0003382	7	57	9	107
863	0.0003353	9	55	10	97
864	0.0003482	16	67	12	118
865	0.0003283	28	80	10	126
866	0.0003292	29	81	14	129
867	0.0003198	11	64	19	117
868	0.0003177	9	62	19	115
869	0.0003022	52	87	11	122
870	0.0003305	25	53	7	81
871	0.0003304	25	76	16	127
872	0.000324	25	73	9	121
873	0.000345	2	68	14	134
874	0.0003258	17	71	15	125
875	0.0003695	8	64	11	120
876	0.0003409	4	69	12	134
877	0.0003503	3	64	13	125
878	0.0003286	8	59	11	109
879	0.0003073	49	81	13	113
880	0.0003272	14	71	15	128
881	0.0003071	11	49	9	87
882	0.0003243	13	67	10	121
883	0.0003383	26	81	9	136
884	0.0003412	30	79	12	128
885	0.0003405	7	56	9	105
886	0.0003194	8	68	14	128
887	0.0003283	12	60	12	108
888	0.0003358	9	65	10	117
889	0.0003068	20	65	9	110
890	0.000325	7	61	15	115
891	0.0003365	60	91	13	122
892	0.0003508	9	69	18	129
893	0.0003151	5	57	10	107
894	0.0003206	1	57	13	113
895	0.0003117	33	75	11	117
896	0.0003154	18	58	12	98
897	0.0003375	26	73	14	114
898	0.0003084	6	58	11	107
899	0.000335	15	74	13	133
900	0.0003327	31	76	9	121
901	0.0003218	28	66	10	104
902	0.0003258	28	82	13	136
903	0.0003295	17	73	11	129
904	0.0003556	15	74	16	133
905	0.000331	21	68	15	115
906	0.0003367	10	61	9	105
907	0.0003203	27	73	11	119
908	0.0003201	14	66	9	112
909	0.0003391	14	64	13	114
910	0.0003288	4	62	12	120
911	0.0003291	9	59	9	109
912	0.0003236	9	66	13	114
913	0.0003177	14	71	17	128
914	0.0003251	19	65	10	111
915	0.0003158	1	60	10	118
916	0.0003135	12	58	10	104
917	0.0003509	54	91	14	128
918	0.0003098	19	63	11	101
919	0.0003277	38	84	13	130
920	0.000376	16	69	13	122
921	0.0003229	9	63	19	117
922	0.0003261	12	60	10	106
923	0.0003606	11	67	12	123
924	0.0003354	14	74	16	134
925	0.0003263	2	57	13	112
926	0.0003407	17	66	15	115
927	0.0003194	36	72	11	108
928	0.0003652	7	54	9	101
929	0.0003475	9	54	10	99
930	0.0003171	4	62	9	120
931	0.000323	16	69	11	122
932	0.0003217	0	51	10	102
933	0.0003228	12	54	7	96
934	0.000315	4	63	11	121
935	0.0003643	6	64	15	122
936	0.0003241	6	74	17	142
937	0.0003111	33	74	15	115
938	0.0003978	15	65	13	115
939	0.0003221	24	69	14	114
940	0.0003239	12	58	9	104
941	0.0003437	12	69	13	112
942	0.0003218	47	90	13	133
943	0.000343	15	62	12	109
944	0.0003414	37	78	11	117
945	0.0003277	10	63	10	113
946	0.0003334	42	68	11	94
947	0.0003389	22	77	13	132
948	0.0003213	10	66	11	114
949	0.0003341	20	71	10	122
950	0.0003731	52	94	13	131
951	0.0003413	6	56	10	106
952	0.0003063	5	55	10	105
953	0.0003292	7	65	19	123
954	0.0003413	44	78	11	110
955	0.0005554	17	61	9	105
956	0.0003381	5	60	10	115
957	0.0003185	4	42	12	80
958	0.0003291	3	50	11	97
959	0.0003143	34	62	12	90
960	0.0003097	38	78	12	109
961	0.0003183	7	69	16	131
962	0.0003435	9	69	16	129
963	0.0003404	10	57	10	104
964	0.0003281	53	87	11	121
965	0.0003276	52	94	11	135
966	0.0003261	39	82	10	123
967	0.0003265	22	70	11	118
968	0.0003362	5	56	9	107
969	0.0003424	21	59	9	97
970	0.0003447	10	51	7	91
971	0.0003473	26	64	11	102
972	0.0003528	8	60	9	111
973	0.0003185	21	66	10	105
974	0.0003179	22	70	12	107
975	0.0003148	2	67	13	132
976	0.0003479	42	88	16	134
977	0.0003264	1	57	11	113
978	0.0003194	26	69	8	112
979	0.0003279	32	76	13	120
980	0.0003266	25	75	11	125
981	0.0003304	33	77	16	121
982	0.0003089	18	62	10	106
983	0.000332	49	84	12	119
984	0.0003343	6	53	10	100
985	0.0003221	19	64	9	109
986	0.0003651	3	74	19	145
987	0.0003132	7	65	8	121
988	0.0003155	20	72	13	124
989	0.0003337	5	67	10	129
990	0.0003188	5	60	11	114
991	0.0003131	5	60	11	113
992	0.0003548	15	68	10	112
993	0.0003279	23	70	12	116
994	0.0003067	25	66	12	107
995	0.0003774	1	50	10	99
996	0.0003076	58	97	12	132
997	0.0003115	38	78	9	118
998	0.0003166	34	78	13	118
999	0.000315	7	58	11	103
mean	0.000333539	19.658	68.622	12.431	116.308

## Sheet: PolyMin_SEq
	time	SEq	Bal	Reg	Egal
0	0.0027378	34	74	8	114
1	0.0030391	6	55	11	104
2	0.0027198	32	71	12	110
3	0.002958	26	80	13	134
4	0.0030104	12	58	11	104
5	0.0033582	7	60	10	113
6	0.00256	9	56	11	103
7	0.0033727	15	70	8	125
8	0.0029131	34	74	16	114
9	0.0029014	4	61	11	118
10	0.0025756	14	56	8	98
11	0.0027519	18	64	11	110
12	0.0026804	19	68	10	117
13	0.0026212	13	69	14	125
14	0.002608	43	71	10	99
15	0.0027587	46	78	10	110
16	0.0028118	3	53	12	103
17	0.0025812	2	61	9	120
18	0.0029318	19	55	10	91
19	0.0027407	50	74	11	98
20	0.0027098	5	53	16	101
21	0.0028561	12	55	11	98
22	0.0027995	7	53	17	99
23	0.0029837	5	65	10	125
24	0.0031017	7	61	12	115
25	0.0027121	28	68	10	108
26	0.002854	39	75	11	111
27	0.0028239	8	45	8	82
28	0.0027693	13	59	9	105
29	0.0030311	12	65	8	118
30	0.0026366	28	71	18	114
31	0.0027569	11	65	11	119
32	0.0028522	9	56	8	103
33	0.0026334	9	66	18	123
34	0.0030301	1	54	9	107
35	0.0028384	29	77	10	125
36	0.0026367	26	77	14	128
37	0.0027437	29	73	15	117
38	0.0028388	41	79	11	117
39	0.0027967	12	68	14	124
40	0.0029351	13	56	9	99
41	0.0029021	20	74	12	128
42	0.0030509	16	54	15	92
43	0.0030401	17	65	11	113
44	0.0028618	7	60	9	113
45	0.0028107	25	48	8	71
46	0.0029319	17	70	12	123
47	0.002598	17	69	16	121
48	0.0031705	16	72	17	128
49	0.0031917	7	60	12	113
50	0.0027564	33	68	11	103
51	0.0028971	46	80	13	114
52	0.0025104	74	99	11	124
53	0.003087	10	74	17	138
54	0.0029177	19	48	11	77
55	0.0028253	4	48	7	92
56	0.0028556	40	79	16	118
57	0.0027441	25	80	16	135
58	0.0029865	15	48	8	81
59	0.0029519	12	61	10	110
60	0.003079	0	51	7	102
61	0.0025239	3	50	10	97
62	0.002593	16	63	11	110
63	0.002962	11	59	12	107
64	0.0028829	6	67	12	128
65	0.0029147	2	60	15	118
66	0.0027634	8	53	13	98
67	0.0027922	4	62	19	120
68	0.0027659	2	55	13	108
69	0.0025079	30	74	19	118
70	0.0026225	6	74	19	142
71	0.0027036	24	75	19	126
72	0.0030451	26	71	14	116
73	0.0029005	28	58	10	88
74	0.0029872	12	71	11	130
75	0.0027655	11	63	19	115
76	0.0026111	25	80	14	135
77	0.0029047	10	59	11	108
78	0.002721	60	88	13	116
79	0.0031541	12	68	13	124
80	0.0028837	17	60	11	103
81	0.0029229	7	47	10	87
82	0.0027908	59	78	11	97
83	0.0027236	1	43	13	85
84	0.0028377	7	58	12	109
85	0.0029146	8	63	13	118
86	0.0027853	16	68	13	120
87	0.0025412	17	54	7	91
88	0.002977	4	45	10	86
89	0.0030043	17	59	8	101
90	0.002643	35	73	16	111
91	0.0028559	42	77	14	112
92	0.0025259	10	55	8	100
93	0.002797	3	55	10	107
94	0.0029615	37	64	14	91
95	0.003129	2	51	11	100
96	0.002908	4	59	9	114
97	0.002825	14	54	9	94
98	0.002795	28	76	13	124
99	0.0027715	9	52	10	95
100	0.002916	33	73	9	113
101	0.0027329	14	62	10	110
102	0.0027481	3	57	11	111
103	0.0027818	1	49	8	97
104	0.0029399	21	73	19	125
105	0.0030343	3	70	8	137
106	0.0030334	12	66	16	120
107	0.0030981	19	71	10	123
108	0.0027767	24	72	19	120
109	0.0026733	7	62	12	117
110	0.0027307	13	58	11	103
111	0.0028327	7	61	16	115
112	0.0024655	27	57	11	87
113	0.0029625	15	55	9	95
114	0.0027927	15	82	18	149
115	0.0028445	33	65	8	97
116	0.0030304	15	70	10	125
117	0.0027019	13	58	9	103
118	0.0031166	5	57	10	109
119	0.0030058	18	57	8	96
120	0.0026164	10	64	12	118
121	0.0029046	8	57	11	106
122	0.0027473	15	61	8	107
123	0.0025281	36	75	13	114
124	0.0028666	13	61	9	109
125	0.002844	1	68	12	135
126	0.0029233	19	65	13	111
127	0.0030464	21	59	7	97
128	0.0025741	25	81	17	137
129	0.0028233	10	61	11	112
130	0.0028861	24	79	18	134
131	0.0028483	27	83	11	139
132	0.0027949	5	57	12	109
133	0.0026291	77	110	17	143
134	0.0029787	13	60	8	107
135	0.0029881	12	60	9	108
136	0.0032157	46	91	14	136
137	0.0030703	8	54	12	100
138	0.0027433	24	76	18	128
139	0.0029838	28	73	10	118
140	0.0032798	33	70	9	107
141	0.0029684	30	69	11	108
142	0.0028258	9	59	11	109
143	0.0031712	42	81	12	120
144	0.0032182	9	69	10	129
145	0.0029054	31	69	13	107
146	0.0028614	54	76	11	98
147	0.0027882	3	54	10	105
148	0.0031559	5	61	11	117
149	0.0028956	3	60	12	117
150	0.0030362	4	67	18	130
151	0.0027773	2	57	17	112
152	0.0028879	63	94	12	125
153	0.0028568	11	63	13	115
154	0.0026087	16	68	11	120
155	0.0030017	10	67	9	124
156	0.0030622	30	66	9	102
157	0.0027721	26	65	10	104
158	0.0027144	4	53	14	102
159	0.0026698	10	55	9	100
160	0.0031572	5	52	8	99
161	0.0028459	8	59	17	110
162	0.0028181	11	47	10	83
163	0.0026584	24	73	17	122
164	0.0029896	21	69	14	117
165	0.0025979	41	94	15	147
166	0.0031187	5	55	9	105
167	0.0026882	19	64	11	109
168	0.0029522	8	65	11	122
169	0.0029841	10	70	16	130
170	0.0029564	11	59	14	107
171	0.0028653	6	61	10	116
172	0.0028967	14	68	10	122
173	0.0029534	28	69	10	110
174	0.0029627	3	65	11	127
175	0.0029915	40	72	10	104
176	0.0030034	8	58	11	108
177	0.0030448	4	45	12	86
178	0.0028985	2	63	12	124
179	0.0028362	47	78	10	109
180	0.0029207	19	78	10	137
181	0.0027529	27	71	12	115
182	0.0026128	13	63	11	113
183	0.0030957	11	64	17	117
184	0.0028736	32	71	12	110
185	0.0029883	24	63	11	102
186	0.0027522	31	76	13	121
187	0.0031069	16	79	10	142
188	0.0028274	23	77	11	131
189	0.0031826	12	56	11	100
190	0.002797	51	84	11	117
191	0.0031072	30	68	8	106
192	0.0027887	0	65	13	130
193	0.0028296	23	64	9	105
194	0.0029311	10	70	9	130
195	0.0030419	7	63	11	119
196	0.0030486	16	61	11	106
197	0.002759	11	68	18	125
198	0.0029841	6	65	13	124
199	0.0028229	4	42	11	80
200	0.0028596	6	70	14	134
201	0.0029971	3	60	11	117
202	0.0027942	31	72	18	113
203	0.0028522	18	59	8	100
204	0.0025964	2	69	18	136
205	0.0027416	0	67	19	134
206	0.0028588	15	58	11	101
207	0.0027968	47	85	11	123
208	0.0030703	22	68	12	114
209	0.0029521	14	68	13	122
210	0.0028068	9	67	16	125
211	0.0030464	17	81	16	145
212	0.0025493	19	77	18	135
213	0.0025387	17	78	13	139
214	0.0035284	42	88	17	134
215	0.002528	16	67	15	118
216	0.0027316	62	95	11	128
217	0.0028725	13	59	9	105
218	0.0029719	26	73	9	120
219	0.0027189	49	80	18	111
220	0.0029066	33	74	10	115
221	0.0027837	20	77	15	134
222	0.0031339	4	49	9	94
223	0.0029212	2	53	11	104
224	0.0029164	1	56	11	111
225	0.0027299	13	88	19	163
226	0.0029046	5	58	7	111
227	0.0030693	13	56	10	99
228	0.0031794	11	76	19	141
229	0.0029146	3	57	10	111
230	0.0025749	24	64	10	104
231	0.0028943	17	70	11	123
232	0.0028168	24	67	11	110
233	0.0031316	10	59	10	108
234	0.0027649	3	58	8	113
235	0.0028659	27	73	15	119
236	0.0031702	15	68	11	121
237	0.0027295	22	74	17	126
238	0.0026258	4	61	12	118
239	0.0029399	11	59	10	107
240	0.0027843	21	88	17	155
241	0.0027335	8	63	9	118
242	0.0027028	17	74	16	131
243	0.0028525	16	68	13	120
244	0.0029664	10	60	9	110
245	0.0029968	16	65	12	114
246	0.0028949	36	73	9	110
247	0.0029258	5	66	12	127
248	0.002621	15	69	11	123
249	0.0030383	20	65	11	110
250	0.0025976	8	52	14	96
251	0.0025508	11	67	16	123
252	0.0025702	34	74	15	114
253	0.002842	8	64	10	120
254	0.0031048	33	76	11	119
255	0.0027625	70	105	19	140
256	0.0029147	1	47	8	93
257	0.0026286	6	64	11	122
258	0.0030195	4	61	8	118
259	0.0030094	5	57	12	109
260	0.002869	8	59	17	110
261	0.0031	19	64	11	109
262	0.0026725	65	89	12	113
263	0.0030364	27	72	14	117
264	0.0034347	17	64	14	111
265	0.0026536	66	110	19	154
266	0.003138	33	67	8	101
267	0.0031401	8	60	8	112
268	0.0028621	40	77	11	114
269	0.0025355	4	73	17	142
270	0.0028464	20	71	12	122
271	0.0025828	32	76	13	120
272	0.003043	7	64	12	121
273	0.003007	17	67	11	117
274	0.0027394	0	60	17	120
275	0.0028552	43	81	13	119
276	0.0027861	11	83	18	155
277	0.0029221	56	88	12	120
278	0.0029024	11	63	14	115
279	0.0028218	35	86	17	137
280	0.0028059	5	71	14	137
281	0.0031272	15	80	10	145
282	0.002894	12	51	10	90
283	0.0030368	27	76	15	125
284	0.0029417	23	63	12	103
285	0.002848	22	71	12	120
286	0.0029506	9	77	17	145
287	0.0030856	6	65	9	124
288	0.0029435	3	52	9	101
289	0.0025975	21	51	8	81
290	0.0026097	69	116	17	163
291	0.0027527	56	78	13	100
292	0.0025698	12	73	19	134
293	0.0025838	35	69	9	103
294	0.0028168	23	71	14	119
295	0.0029256	20	63	13	106
296	0.0027821	0	57	18	114
297	0.0025291	22	80	16	138
298	0.0030216	1	57	11	113
299	0.0027544	2	64	18	126
300	0.0025994	3	67	19	131
301	0.0026345	12	62	9	112
302	0.0025668	24	63	11	102
303	0.0028248	15	56	14	97
304	0.0028542	5	58	17	111
305	0.0027845	8	57	12	106
306	0.0032667	11	51	8	91
307	0.002563	41	90	16	139
308	0.0031257	7	64	11	121
309	0.0028094	74	103	12	132
310	0.0029362	22	73	9	124
311	0.0032388	9	63	14	117
312	0.003196	28	72	15	116
313	0.0027935	7	67	12	127
314	0.0028779	3	65	10	127
315	0.0026392	8	66	17	124
316	0.0029308	13	60	17	107
317	0.0026515	14	63	12	112
318	0.0031385	11	55	10	99
319	0.0027656	19	75	12	131
320	0.002972	31	69	17	107
321	0.0033121	28	67	9	106
322	0.0030825	53	75	17	97
323	0.0029802	15	64	13	113
324	0.0029449	20	70	14	120
325	0.0030912	41	81	11	121
326	0.0029918	27	65	15	103
327	0.0030624	34	70	15	106
328	0.0030651	12	82	10	152
329	0.0029764	28	76	13	124
330	0.0026497	17	73	14	129
331	0.0027253	14	69	14	124
332	0.0027813	47	85	14	123
333	0.0029444	20	67	15	114
334	0.0029175	14	53	8	92
335	0.0030342	1	62	9	123
336	0.0026003	37	71	10	105
337	0.0028244	9	61	14	113
338	0.0028159	11	63	15	115
339	0.0028688	27	71	19	115
340	0.0028149	14	60	7	106
341	0.0025382	8	55	19	102
342	0.0027313	9	72	11	135
343	0.0029075	8	44	10	80
344	0.0026877	2	50	11	98
345	0.0028159	6	66	13	126
346	0.0029556	27	82	11	137
347	0.0028805	14	67	16	120
348	0.0032613	10	69	19	128
349	0.0028991	6	49	10	92
350	0.0032526	15	55	10	95
351	0.0029926	35	79	9	123
352	0.0030273	14	68	12	122
353	0.0025769	7	61	11	115
354	0.0030657	10	51	10	92
355	0.0028568	18	65	9	112
356	0.0029185	7	73	13	139
357	0.0028603	24	74	11	124
358	0.0029659	23	87	18	151
359	0.0026927	22	60	9	98
360	0.003192	32	92	16	152
361	0.0030423	16	61	11	106
362	0.003392	8	52	8	96
363	0.0028907	2	40	11	78
364	0.0027025	25	78	18	131
365	0.0029322	34	72	8	110
366	0.0025441	24	73	19	122
367	0.0026926	28	70	11	112
368	0.003118	1	66	11	131
369	0.0027949	19	61	11	103
370	0.0027432	4	53	11	102
371	0.0027978	70	101	13	132
372	0.002776	2	71	17	140
373	0.0026204	70	110	12	150
374	0.0027711	37	86	15	135
375	0.0027574	5	58	7	111
376	0.0027326	3	53	19	103
377	0.0027664	8	54	10	100
378	0.002936	14	72	11	130
379	0.0030959	2	65	11	128
380	0.0024993	10	70	17	130
381	0.0027704	8	52	13	96
382	0.0030091	42	89	18	136
383	0.003055	22	63	9	104
384	0.002893	17	57	10	97
385	0.0026365	22	91	14	160
386	0.0027853	23	56	10	89
387	0.0030498	32	73	8	114
388	0.0031112	14	65	13	116
389	0.0032577	6	53	10	100
390	0.0028953	49	85	11	121
391	0.0025196	5	46	6	87
392	0.0028371	0	51	9	102
393	0.0025628	39	83	16	127
394	0.0028937	11	69	13	127
395	0.0025552	25	75	19	125
396	0.0024957	38	77	12	116
397	0.0027173	13	66	11	119
398	0.0030961	62	95	10	128
399	0.0028224	54	101	19	148
400	0.0025906	17	68	19	119
401	0.003219	4	55	16	106
402	0.0029144	15	62	8	109
403	0.0028388	4	51	12	98
404	0.0029416	17	83	15	149
405	0.0029467	6	47	11	88
406	0.002786	2	64	13	126
407	0.0029392	21	74	15	127
408	0.0026709	12	82	11	152
409	0.0026016	19	65	13	111
410	0.0025551	34	77	16	120
411	0.0030348	27	61	10	95
412	0.0026641	27	74	17	121
413	0.0034774	27	84	15	141
414	0.0026153	36	83	13	130
415	0.0029906	50	88	17	126
416	0.0027712	3	63	16	123
417	0.0028333	5	76	16	147
418	0.0028872	6	61	9	116
419	0.0028481	21	78	15	135
420	0.002847	13	68	13	123
421	0.003016	17	68	10	119
422	0.0029455	10	57	9	104
423	0.0027698	8	56	12	104
424	0.0030504	15	67	15	119
425	0.0029314	7	61	12	115
426	0.0029014	0	63	16	126
427	0.0030128	7	63	11	119
428	0.0031332	41	88	11	135
429	0.0027017	25	70	14	115
430	0.0027537	30	71	9	112
431	0.0029	7	54	9	101
432	0.0028424	31	75	16	119
433	0.0033527	7	54	9	101
434	0.0028797	1	49	9	97
435	0.0026813	11	66	9	121
436	0.0029057	1	59	13	117
437	0.0029964	28	72	8	116
438	0.0025715	22	66	14	110
439	0.0030967	12	61	10	110
440	0.0032268	21	73	15	125
441	0.0027011	3	64	17	125
442	0.002898	22	83	13	144
443	0.0028709	20	66	12	112
444	0.002688	18	63	17	108
445	0.0028478	19	82	12	145
446	0.0026793	6	64	11	122
447	0.0025794	7	71	18	135
448	0.0025741	23	87	19	151
449	0.0026424	16	59	13	102
450	0.0029434	8	67	12	126
451	0.0028359	30	64	9	98
452	0.0030044	12	66	10	120
453	0.0028924	42	92	16	142
454	0.0029817	7	59	10	111
455	0.0029287	53	93	12	133
456	0.003012	7	54	11	101
457	0.0026759	34	83	11	132
458	0.0030543	26	68	10	110
459	0.0031911	35	70	13	105
460	0.0028803	0	63	11	126
461	0.0028869	17	72	18	127
462	0.0030885	2	53	10	104
463	0.002607	2	63	17	124
464	0.0031076	2	47	7	92
465	0.0031862	15	72	10	129
466	0.002695	28	76	16	124
467	0.0030707	35	72	11	109
468	0.0028873	26	87	19	148
469	0.0028183	22	68	8	114
470	0.0026596	19	69	10	119
471	0.0027864	7	54	9	101
472	0.0028379	45	82	12	119
473	0.0025616	8	58	13	108
474	0.0027174	13	44	6	75
475	0.0029908	22	66	14	110
476	0.0029136	27	61	11	95
477	0.0028049	24	78	13	132
478	0.0031322	2	58	9	114
479	0.003023	10	46	11	82
480	0.0027702	79	105	10	131
481	0.0026368	8	67	16	126
482	0.0025856	18	66	13	114
483	0.0028231	22	63	18	104
484	0.002506	46	89	16	132
485	0.0025561	20	71	11	122
486	0.0027966	28	70	13	112
487	0.0026196	1	65	15	129
488	0.0028222	40	81	15	122
489	0.0027711	13	63	11	113
490	0.0026396	20	77	14	134
491	0.0029024	26	69	12	112
492	0.00275	33	94	15	155
493	0.002811	38	79	16	120
494	0.0025999	62	89	11	116
495	0.002956	9	53	12	97
496	0.0030131	3	64	9	125
497	0.0026618	3	63	19	123
498	0.0026917	42	91	18	140
499	0.002695	3	58	14	113
500	0.0026788	17	60	10	103
501	0.0028491	10	80	19	150
502	0.0031607	14	68	12	122
503	0.0030009	7	54	8	101
504	0.0026751	4	68	18	132
505	0.0029365	20	67	12	114
506	0.0028118	25	56	9	87
507	0.0026433	5	62	18	119
508	0.0028152	0	67	18	134
509	0.0026455	69	93	11	117
510	0.0028127	15	65	18	115
511	0.0028916	12	86	19	160
512	0.0030917	22	58	7	94
513	0.0029031	10	60	12	110
514	0.0028363	1	47	10	93
515	0.002965	7	61	10	115
516	0.0032265	9	56	8	103
517	0.0029734	4	57	11	110
518	0.0026077	6	63	13	120
519	0.0030546	8	68	11	128
520	0.002761	2	51	10	100
521	0.0026662	13	63	16	113
522	0.0029403	20	74	15	128
523	0.0028123	9	64	15	119
524	0.0028245	3	54	11	105
525	0.0029512	19	61	16	103
526	0.0029298	44	80	15	116
527	0.002737	44	81	9	118
528	0.0028557	11	55	15	99
529	0.0027419	1	54	8	107
530	0.0027278	6	66	19	126
531	0.0029798	4	60	10	116
532	0.0029177	45	81	13	117
533	0.0029792	28	63	10	98
534	0.00299	8	52	14	96
535	0.002981	2	58	10	114
536	0.0029549	2	69	19	136
537	0.0028367	12	71	15	130
538	0.002637	26	63	17	100
539	0.0033242	11	70	10	129
540	0.002522	11	64	13	117
541	0.0028857	18	59	8	100
542	0.0028249	1	67	18	133
543	0.0031761	26	78	10	130
544	0.0026381	18	72	13	126
545	0.0032097	14	60	10	106
546	0.0029806	6	59	17	112
547	0.0029225	26	63	10	100
548	0.0028026	3	64	11	125
549	0.0028427	3	57	10	111
550	0.002832	1	63	14	125
551	0.0027335	20	75	10	130
552	0.0027305	4	61	10	118
553	0.0029312	2	65	10	128
554	0.0028776	9	63	16	117
555	0.0027628	33	67	13	101
556	0.0029331	9	64	17	119
557	0.0030227	51	79	10	107
558	0.0026115	15	61	13	107
559	0.0029785	13	62	10	111
560	0.002814	1	59	11	117
561	0.0027557	17	61	12	105
562	0.0027645	16	50	9	84
563	0.0029815	19	70	10	121
564	0.002789	9	52	13	95
565	0.0025182	13	54	9	95
566	0.0029605	4	63	10	122
567	0.00266	32	76	11	120
568	0.0029042	43	79	15	115
569	0.0029173	6	54	10	102
570	0.0029373	14	72	11	130
571	0.0025975	26	66	12	106
572	0.0028263	35	75	9	115
573	0.0028127	3	48	9	93
574	0.0026135	11	61	10	111
575	0.003054	5	56	13	107
576	0.0029174	49	77	16	105
577	0.0031513	17	55	8	93
578	0.0026239	3	49	9	95
579	0.0028728	11	51	10	91
580	0.0029241	23	75	12	127
581	0.0029327	22	71	11	120
582	0.0031097	28	80	13	132
583	0.0027583	17	57	9	97
584	0.0028146	20	71	12	122
585	0.0029921	18	67	19	116
586	0.002796	28	76	18	124
587	0.00277	30	76	17	122
588	0.0028756	36	78	13	120
589	0.0027809	22	73	10	124
590	0.0028887	20	75	17	130
591	0.0030012	4	64	11	124
592	0.0028371	59	94	11	129
593	0.0028187	6	49	9	92
594	0.0025254	39	71	10	103
595	0.0027309	47	84	10	121
596	0.0027756	27	71	12	115
597	0.0030353	2	76	19	150
598	0.0028794	24	57	10	90
599	0.0029313	1	56	13	111
600	0.0030199	0	48	11	96
601	0.0029305	14	60	11	106
602	0.0028201	19	61	9	103
603	0.0028305	20	64	10	108
604	0.0030693	53	83	15	113
605	0.0028848	55	91	13	127
606	0.003093	15	65	9	115
607	0.0030148	50	85	15	120
608	0.0038285	7	54	11	101
609	0.0028611	8	62	10	116
610	0.0029851	13	55	10	97
611	0.0028307	26	63	9	100
612	0.0030025	3	62	11	121
613	0.0029851	5	60	11	115
614	0.0026259	3	62	13	121
615	0.0032706	7	57	10	107
616	0.0029496	27	74	9	121
617	0.0027584	8	56	11	104
618	0.0029184	6	49	9	92
619	0.0031695	35	70	9	105
620	0.0029342	1	48	11	95
621	0.0028987	12	55	10	98
622	0.0029396	10	55	11	100
623	0.0029532	10	70	13	130
624	0.0025725	29	68	11	107
625	0.0029181	12	69	9	126
626	0.0027605	14	69	15	124
627	0.0028284	25	76	16	127
628	0.0030113	34	74	13	114
629	0.0027736	3	43	10	83
630	0.0026516	51	72	12	93
631	0.0027081	0	65	18	130
632	0.0026831	5	47	17	89
633	0.0026679	45	77	12	109
634	0.0027003	24	76	12	128
635	0.0027635	16	59	15	102
636	0.0026056	10	54	9	98
637	0.002728	7	78	19	149
638	0.0029891	7	59	9	111
639	0.0028976	3	57	12	111
640	0.0027705	51	97	17	143
641	0.0028466	9	51	11	93
642	0.0028305	14	55	12	96
643	0.0027707	17	64	8	111
644	0.0028848	13	51	8	89
645	0.0027228	23	59	9	95
646	0.0027562	44	77	14	110
647	0.002622	7	53	9	99
648	0.0027979	8	53	11	98
649	0.0031327	3	57	10	111
650	0.0027811	11	67	19	123
651	0.0027923	17	77	17	137
652	0.0030552	6	61	10	116
653	0.0030756	4	61	17	118
654	0.0031631	31	77	9	123
655	0.0029591	35	70	12	105
656	0.0026351	13	63	16	113
657	0.0028846	18	62	15	106
658	0.0030899	24	70	12	116
659	0.0030562	5	66	11	127
660	0.0029839	12	72	18	132
661	0.0027789	41	89	16	137
662	0.0027772	2	52	9	102
663	0.0030659	42	82	9	122
664	0.0028587	12	57	18	102
665	0.0027619	16	63	12	110
666	0.0028223	53	93	18	133
667	0.0030001	31	76	10	121
668	0.002811	35	76	15	117
669	0.0028454	25	76	13	127
670	0.0032193	14	53	9	92
671	0.0027082	30	67	13	104
672	0.0028526	13	53	8	93
673	0.0025951	66	112	17	158
674	0.003091	5	61	19	117
675	0.0027022	11	77	15	143
676	0.0027058	24	65	10	106
677	0.0028475	12	60	11	108
678	0.0031831	0	54	8	108
679	0.0027874	0	49	9	98
680	0.003172	39	87	13	135
681	0.0028788	26	81	16	136
682	0.0028162	11	58	14	105
683	0.003162	27	75	10	123
684	0.0029007	23	87	18	151
685	0.0028637	24	95	19	166
686	0.00306	32	86	13	140
687	0.0029307	64	95	16	126
688	0.0030773	12	65	13	118
689	0.0028096	11	65	12	119
690	0.0026233	5	58	16	111
691	0.0029392	17	80	14	143
692	0.0026574	5	63	13	121
693	0.0026349	28	80	15	132
694	0.0028352	4	63	11	122
695	0.0030688	3	58	8	113
696	0.0027171	21	76	15	131
697	0.0027665	24	79	10	134
698	0.0026128	40	80	12	120
699	0.0029551	11	56	8	101
700	0.0030513	25	68	16	111
701	0.0026714	51	79	12	107
702	0.0030509	16	68	11	120
703	0.0026844	10	65	17	120
704	0.0029474	26	67	11	108
705	0.0030537	29	75	10	121
706	0.0026423	14	58	10	102
707	0.0030587	2	50	15	98
708	0.00296	29	69	11	109
709	0.002947	3	59	10	115
710	0.0029346	35	62	16	89
711	0.0026218	23	69	13	115
712	0.002624	7	70	18	133
713	0.0027691	29	77	19	125
714	0.0028082	4	56	10	108
715	0.0030034	5	59	10	113
716	0.0025643	20	72	16	124
717	0.002906	16	66	13	116
718	0.0031738	40	83	10	126
719	0.0028874	36	84	11	132
720	0.0028623	8	68	17	128
721	0.0030148	54	81	11	108
722	0.0031288	1	49	8	97
723	0.0027089	25	79	18	133
724	0.0026786	0	49	13	98
725	0.0028873	14	67	13	120
726	0.0028765	16	58	11	100
727	0.0029469	31	80	13	129
728	0.0027477	3	51	11	99
729	0.002746	14	63	10	112
730	0.003196	12	68	10	124
731	0.003114	37	66	15	95
732	0.0030545	28	84	13	140
733	0.0026365	21	63	9	105
734	0.0028423	9	52	9	95
735	0.0026549	24	64	10	104
736	0.0030453	8	58	10	108
737	0.0027943	24	66	10	108
738	0.0028404	75	115	14	155
739	0.0032391	0	57	13	114
740	0.0029735	2	58	16	114
741	0.0029484	6	57	9	108
742	0.0028296	5	60	11	115
743	0.0027203	19	69	10	119
744	0.0027483	1	63	10	125
745	0.002868	28	74	11	120
746	0.0028013	53	87	15	121
747	0.0028322	11	71	12	131
748	0.0028313	17	58	9	99
749	0.0030326	4	58	9	112
750	0.0027582	24	62	10	100
751	0.0028225	12	58	13	104
752	0.0028281	13	65	11	117
753	0.0028746	16	68	17	120
754	0.0030094	26	71	11	116
755	0.0029875	30	81	16	132
756	0.002758	20	69	19	118
757	0.002554	29	70	16	111
758	0.0030489	33	75	9	117
759	0.0026806	24	74	15	124
760	0.0028137	35	84	16	133
761	0.0026128	29	55	9	81
762	0.0029261	9	63	11	117
763	0.0028841	6	68	9	130
764	0.004612	2	58	11	114
765	0.0029425	27	70	12	113
766	0.0029935	39	82	9	125
767	0.0032032	2	48	13	94
768	0.0027636	5	60	12	115
769	0.0028145	2	56	12	110
770	0.0030114	15	77	11	139
771	0.0032288	32	90	15	148
772	0.0030755	35	87	19	139
773	0.0028226	12	59	9	106
774	0.0029193	11	54	9	97
775	0.0026112	45	87	11	129
776	0.0028592	19	50	11	81
777	0.0027459	20	65	16	110
778	0.0030308	19	59	11	99
779	0.0029035	17	68	9	119
780	0.0030727	6	56	7	106
781	0.0030603	18	71	13	124
782	0.0026251	24	76	14	128
783	0.0028066	1	54	7	107
784	0.0031617	35	66	11	97
785	0.0025899	14	74	19	134
786	0.0027395	3	55	12	107
787	0.0027883	6	58	9	110
788	0.002575	14	57	14	100
789	0.0029152	63	93	15	123
790	0.0029626	8	60	11	112
791	0.0031223	4	61	19	118
792	0.00292	17	70	16	123
793	0.0028627	12	69	15	126
794	0.0025788	13	54	9	95
795	0.0024906	25	77	19	129
796	0.0029843	13	63	17	113
797	0.0030868	25	72	13	119
798	0.0028968	7	67	13	127
799	0.0027162	31	67	14	103
800	0.0030561	1	58	14	115
801	0.0027335	3	48	17	93
802	0.0028818	9	57	12	105
803	0.0029303	21	70	9	119
804	0.0029184	1	70	11	139
805	0.0029427	14	72	12	130
806	0.0029267	7	56	12	105
807	0.0026667	30	64	12	98
808	0.0028674	22	69	15	116
809	0.0028473	12	74	12	136
810	0.0029354	16	62	11	108
811	0.0031149	4	65	13	126
812	0.0029015	21	65	12	109
813	0.0029081	9	56	10	103
814	0.0029304	12	62	10	112
815	0.002737	13	51	10	89
816	0.0032929	18	73	11	128
817	0.002742	39	89	14	139
818	0.0026648	3	55	13	107
819	0.002898	1	59	11	117
820	0.0030305	5	64	12	123
821	0.0029424	10	67	10	124
822	0.0030726	14	87	18	160
823	0.002671	35	95	19	155
824	0.0026305	17	63	10	109
825	0.0030099	37	78	12	119
826	0.0029068	16	69	10	122
827	0.0026623	3	63	12	123
828	0.0031532	0	59	12	118
829	0.0029333	4	74	16	144
830	0.0029859	42	82	12	122
831	0.0031888	1	71	11	141
832	0.0029672	17	71	16	125
833	0.0026681	47	92	15	137
834	0.002846	4	63	10	122
835	0.0030069	14	64	12	114
836	0.0027845	2	52	10	102
837	0.002516	17	60	17	103
838	0.0027847	19	81	19	143
839	0.002538	7	59	16	111
840	0.0027375	16	62	10	108
841	0.0029123	1	62	16	123
842	0.0025329	23	69	12	115
843	0.0028878	5	58	9	111
844	0.0028005	14	66	11	118
845	0.0029054	10	64	18	118
846	0.0028981	28	68	18	108
847	0.0026195	62	92	18	122
848	0.0026402	9	60	7	111
849	0.0035439	66	99	12	132
850	0.0028708	7	49	11	91
851	0.0032012	9	53	17	97
852	0.0030694	9	48	7	87
853	0.0029217	16	69	12	122
854	0.0034045	60	85	10	110
855	0.0028217	41	69	8	97
856	0.0026716	21	79	14	137
857	0.0030176	34	72	10	110
858	0.002595	9	60	8	111
859	0.0025856	17	67	8	117
860	0.0031866	13	67	9	121
861	0.0028788	13	67	13	121
862	0.0032702	7	57	9	107
863	0.0029525	16	55	8	94
864	0.0026258	16	67	12	118
865	0.0029041	8	67	10	126
866	0.0031262	20	73	14	126
867	0.0027404	11	64	19	117
868	0.0028044	9	62	19	115
869	0.0030611	0	53	10	106
870	0.0030578	9	47	7	85
871	0.002992	25	76	16	127
872	0.0028507	25	73	9	121
873	0.0027171	2	68	14	134
874	0.0025983	17	71	15	125
875	0.0030504	21	66	8	111
876	0.0030231	4	68	11	132
877	0.0026562	3	64	13	125
878	0.0028552	8	59	11	110
879	0.0033071	33	73	10	113
880	0.0027229	14	71	15	128
881	0.0029478	4	44	6	84
882	0.0024677	13	67	10	121
883	0.0028959	9	71	9	133
884	0.0031608	1	64	11	127
885	0.0027364	7	56	9	105
886	0.0029931	8	68	14	128
887	0.0026087	12	60	12	108
888	0.0029152	19	68	10	117
889	0.0031413	20	65	9	110
890	0.0025837	7	61	15	115
891	0.0031727	6	59	11	112
892	0.0027129	9	69	18	129
893	0.0027383	13	60	10	107
894	0.002555	1	57	13	113
895	0.0027894	66	89	11	112
896	0.0027829	18	58	12	98
897	0.0029865	11	63	14	115
898	0.002875	25	66	11	107
899	0.0026737	15	74	13	133
900	0.0031273	31	76	9	121
901	0.0028183	28	66	10	104
902	0.0027917	28	82	13	136
903	0.0029422	17	73	11	129
904	0.0026171	15	74	16	133
905	0.0025723	21	68	15	115
906	0.0026749	25	65	9	105
907	0.0030939	27	73	11	119
908	0.0027692	32	72	9	112
909	0.0024852	14	64	13	114
910	0.002809	3	62	12	121
911	0.00294	9	59	9	109
912	0.0031092	14	62	13	110
913	0.0025881	14	71	17	128
914	0.0028048	6	62	9	118
915	0.0031555	1	60	10	119
916	0.0028613	1	53	10	105
917	0.0028905	54	91	14	128
918	0.0027368	25	63	11	101
919	0.0025607	38	84	13	130
920	0.0028928	16	69	13	122
921	0.0028442	9	63	19	117
922	0.0028407	34	70	10	106
923	0.0028746	11	67	12	123
924	0.0026405	14	74	16	134
925	0.0027986	18	65	13	112
926	0.0026582	17	66	15	115
927	0.0031411	36	72	11	108
928	0.0029123	7	54	9	101
929	0.0029261	6	51	9	96
930	0.0029277	10	65	9	120
931	0.0029068	16	69	12	122
932	0.0027429	0	51	10	102
933	0.0028337	17	56	7	95
934	0.002839	4	63	11	122
935	0.0027552	6	64	15	122
936	0.0025731	6	74	17	142
937	0.0030689	20	67	17	114
938	0.0028214	15	65	13	115
939	0.0027109	24	69	14	114
940	0.0027958	12	58	11	104
941	0.0027702	12	69	13	126
942	0.0030363	12	68	12	124
943	0.0028039	15	62	12	109
944	0.0028568	47	81	11	115
945	0.0030066	25	69	10	113
946	0.0028106	42	68	11	94
947	0.0033945	22	77	13	132
948	0.0028204	30	72	11	114
949	0.0024785	20	71	10	122
950	0.0026577	65	98	13	131
951	0.0026221	6	56	10	106
952	0.0031845	5	55	10	105
953	0.0026456	7	65	19	123
954	0.0028171	54	82	11	110
955	0.0031569	6	57	8	108
956	0.0026912	5	60	10	115
957	0.0028222	4	42	12	80
958	0.002736	3	50	11	97
959	0.0028851	34	62	12	90
960	0.0031786	13	59	13	105
961	0.0032466	54	92	17	130
962	0.0025959	9	69	16	129
963	0.0027675	10	57	10	104
964	0.0029676	53	87	13	121
965	0.0029656	59	97	11	135
966	0.0032537	1	58	14	115
967	0.0027089	22	70	11	118
968	0.0029633	17	62	8	107
969	0.002693	21	59	9	97
970	0.0028385	10	51	7	92
971	0.0029523	26	64	11	102
972	0.0030863	8	60	9	112
973	0.0028316	47	76	10	105
974	0.0027616	24	68	10	112
975	0.0030378	18	72	13	126
976	0.0027312	42	88	16	134
977	0.002489	1	57	11	113
978	0.0025892	26	69	8	112
979	0.0027439	39	79	13	119
980	0.0027882	25	75	11	125
981	0.0026949	33	77	16	121
982	0.0030671	18	62	10	106
983	0.0025623	49	84	12	119
984	0.0028399	6	53	10	100
985	0.0028388	1	50	10	99
986	0.0027618	3	74	19	145
987	0.0030172	1	61	8	121
988	0.0029272	20	72	13	124
989	0.0027817	5	67	10	129
990	0.0030082	15	64	11	113
991	0.0027984	5	60	11	115
992	0.0028086	36	74	10	112
993	0.0032102	46	81	12	116
994	0.0030702	8	56	9	104
995	0.0026438	1	50	10	99
996	0.0030283	6	61	12	116
997	0.0031891	38	78	9	118
998	0.0029405	38	78	13	118
999	0.0029249	17	60	11	103
mean	0.00286766	18.471	66.985	12.313	115.499

## Sheet: PolyMin_Bal
	time	SEq	Bal	Reg	Egal
0	0.0028948	34	74	8	114
1	0.0029388	6	55	11	104
2	0.0027614	32	71	12	110
3	0.0030249	26	80	13	134
4	0.0027991	12	58	11	104
5	0.0028626	7	60	10	113
6	0.0026176	9	56	11	103
7	0.0030433	15	70	8	125
8	0.0029147	34	74	16	114
9	0.0028145	4	61	11	118
10	0.0025921	14	56	8	98
11	0.0028739	18	64	11	110
12	0.0027701	19	68	10	117
13	0.0028813	13	69	14	125
14	0.0025593	43	71	10	99
15	0.0029081	46	78	10	110
16	0.0030682	3	53	12	103
17	0.0027506	2	61	9	120
18	0.0031504	19	55	10	91
19	0.0027175	50	74	11	98
20	0.0028497	5	53	16	101
21	0.0025787	12	55	11	98
22	0.0029009	7	53	17	99
23	0.0028809	5	65	10	125
24	0.0029315	7	61	12	115
25	0.0028529	28	68	10	108
26	0.0029087	39	75	11	111
27	0.0028714	8	45	8	82
28	0.0029305	13	59	9	105
29	0.0029931	12	65	8	118
30	0.002619	28	71	18	114
31	0.0028207	11	65	11	119
32	0.0027299	9	56	8	103
33	0.0026491	9	66	18	123
34	0.0029572	1	54	9	107
35	0.0034186	29	77	10	125
36	0.0027054	26	77	14	128
37	0.0028931	29	73	15	117
38	0.0028252	41	79	11	117
39	0.0025945	12	68	14	124
40	0.0031269	13	56	9	99
41	0.0029934	27	71	13	115
42	0.0028911	16	54	15	92
43	0.0031011	17	65	11	113
44	0.0028063	7	60	9	113
45	0.0027875	25	48	8	71
46	0.0031852	17	70	12	123
47	0.0027078	17	69	16	121
48	0.0032252	16	72	17	128
49	0.0031253	7	60	12	113
50	0.0028877	33	68	11	103
51	0.0027702	46	80	13	114
52	0.0025839	74	99	11	124
53	0.0028117	10	74	17	138
54	0.0029048	19	48	11	77
55	0.0030435	4	48	7	92
56	0.0027147	40	79	16	118
57	0.0028706	25	80	16	135
58	0.0027959	15	48	8	81
59	0.0030788	12	61	10	110
60	0.0030062	0	51	7	102
61	0.0030896	3	50	10	97
62	0.0029754	16	63	11	110
63	0.0031379	11	59	12	107
64	0.0026072	6	67	12	128
65	0.0029388	2	60	15	118
66	0.0029266	8	53	13	98
67	0.0028725	4	62	19	120
68	0.0028096	2	55	13	108
69	0.0025201	30	74	19	118
70	0.0025829	6	74	19	142
71	0.0027159	24	75	19	126
72	0.0031399	26	71	14	116
73	0.0028302	28	58	10	88
74	0.0029634	12	71	11	130
75	0.0028095	11	63	19	115
76	0.0026066	25	80	14	135
77	0.0030264	10	59	11	108
78	0.0027596	60	88	13	116
79	0.0025306	12	68	13	124
80	0.0027585	17	60	11	103
81	0.0027464	7	47	10	87
82	0.0028251	59	78	11	97
83	0.0030976	1	43	13	85
84	0.0029963	7	58	12	109
85	0.0035095	8	63	13	118
86	0.0030075	16	68	13	120
87	0.0024832	17	54	7	91
88	0.0029811	4	45	10	86
89	0.0029113	17	59	8	101
90	0.0026349	35	73	16	111
91	0.0027776	42	77	14	112
92	0.002577	10	55	8	100
93	0.0029449	3	55	10	107
94	0.0026828	37	64	14	91
95	0.003031	2	51	11	100
96	0.0028172	4	59	9	114
97	0.0031503	14	54	9	94
98	0.0027728	28	76	13	124
99	0.0029216	9	52	10	95
100	0.0029447	33	73	9	113
101	0.0028742	14	62	10	110
102	0.0027175	3	57	11	111
103	0.0028999	1	49	8	97
104	0.0027991	21	73	19	125
105	0.003078	3	70	8	137
106	0.0029879	12	66	16	120
107	0.0031969	19	71	10	123
108	0.0029146	24	72	19	120
109	0.0026797	7	62	12	117
110	0.0028173	13	58	11	103
111	0.0026729	7	61	16	115
112	0.002553	27	57	11	87
113	0.0030172	15	55	9	95
114	0.003028	15	82	18	149
115	0.0028606	33	65	8	97
116	0.0030255	15	70	10	125
117	0.002777	13	58	9	103
118	0.0028966	5	57	10	109
119	0.0029676	18	57	8	96
120	0.0027191	10	64	12	118
121	0.0029448	8	57	11	106
122	0.0029064	15	61	8	107
123	0.0025329	36	75	13	114
124	0.0028104	13	61	9	109
125	0.0029654	1	68	12	135
126	0.0037075	19	65	13	111
127	0.0029937	21	59	7	97
128	0.0026098	25	81	17	137
129	0.0027435	10	61	11	112
130	0.0031391	24	79	18	134
131	0.0029941	27	83	11	139
132	0.0026472	5	57	12	109
133	0.0026309	77	110	17	143
134	0.0028588	13	60	8	107
135	0.0028695	12	60	9	108
136	0.0034243	46	91	14	136
137	0.0028486	8	54	12	100
138	0.0026651	24	76	18	128
139	0.0029855	28	73	10	118
140	0.0030123	35	68	13	101
141	0.0029592	30	69	11	108
142	0.0028128	9	59	11	109
143	0.0029889	42	81	12	120
144	0.0028877	9	69	10	129
145	0.0030971	31	69	13	107
146	0.0027952	54	76	11	98
147	0.0027848	3	54	10	105
148	0.0029164	5	61	11	117
149	0.0028486	3	60	12	117
150	0.0027749	4	67	18	130
151	0.0026984	2	57	17	112
152	0.0031048	63	94	12	125
153	0.0028383	11	63	13	115
154	0.0026873	16	68	11	120
155	0.0028677	10	67	9	124
156	0.0030575	30	66	9	102
157	0.0028792	26	65	10	104
158	0.0028287	4	53	14	102
159	0.00251	10	55	9	100
160	0.0030012	5	52	8	99
161	0.0029082	8	59	17	110
162	0.0028695	11	47	10	83
163	0.0026762	24	73	17	122
164	0.0029529	21	69	14	117
165	0.0026435	41	94	15	147
166	0.0030952	5	55	9	105
167	0.0026832	19	64	11	109
168	0.0029432	8	65	11	122
169	0.0027942	10	70	16	130
170	0.0029783	11	59	14	107
171	0.0027772	6	61	10	116
172	0.0028469	14	68	10	122
173	0.0027507	28	69	10	110
174	0.0028101	3	65	11	127
175	0.0030508	40	72	10	104
176	0.0030399	8	58	11	108
177	0.0028759	4	45	12	86
178	0.0029486	2	63	12	124
179	0.0029765	47	78	10	109
180	0.0030822	19	78	10	137
181	0.0026364	27	71	12	115
182	0.0025869	13	63	11	113
183	0.0033701	11	64	17	117
184	0.0028859	32	71	12	110
185	0.0030307	24	63	11	102
186	0.0026742	31	76	13	121
187	0.0029449	20	77	10	134
188	0.0027365	23	77	11	131
189	0.0028701	12	56	11	100
190	0.0027874	51	84	11	117
191	0.0031242	30	68	8	106
192	0.0028515	0	65	13	130
193	0.0028287	23	64	9	105
194	0.0029012	10	70	9	130
195	0.0032606	7	63	11	119
196	0.0029826	16	61	11	106
197	0.0025759	11	68	18	125
198	0.0029411	6	65	13	124
199	0.0024937	4	42	11	80
200	0.0025954	6	70	14	134
201	0.0026252	3	60	11	117
202	0.002685	31	72	18	113
203	0.0029009	18	59	8	100
204	0.0027353	2	69	18	136
205	0.0028744	0	67	19	134
206	0.0029548	15	58	11	101
207	0.0031626	47	80	13	113
208	0.0030327	22	68	12	114
209	0.0028206	14	68	13	122
210	0.0030574	9	67	16	125
211	0.0029264	17	81	16	145
212	0.0029318	19	77	18	135
213	0.0026964	17	78	13	139
214	0.0027244	42	88	17	134
215	0.0026015	16	67	15	118
216	0.0027299	62	95	11	128
217	0.002792	13	59	9	105
218	0.0030057	28	67	9	106
219	0.0026163	49	80	18	111
220	0.0028597	33	74	10	115
221	0.0028361	20	77	15	134
222	0.0028824	4	49	9	94
223	0.0028111	2	53	11	104
224	0.0029389	1	56	11	111
225	0.0027496	13	88	19	163
226	0.0029903	5	58	7	111
227	0.0028829	13	56	10	99
228	0.0027123	11	76	19	141
229	0.0029506	3	57	10	111
230	0.0025978	24	64	10	104
231	0.0028432	17	70	11	123
232	0.0030736	24	67	11	110
233	0.0028775	10	59	10	108
234	0.0025644	3	58	8	113
235	0.002915	27	73	15	119
236	0.0030762	15	68	11	121
237	0.0026621	22	74	17	126
238	0.0027789	4	61	12	118
239	0.00286	11	59	10	107
240	0.0026956	21	88	17	155
241	0.0029515	8	63	9	118
242	0.0028845	17	74	16	131
243	0.0029779	16	68	13	120
244	0.0031459	10	60	9	110
245	0.0029611	16	65	12	114
246	0.002888	36	73	9	110
247	0.002989	5	66	12	127
248	0.002646	15	69	11	123
249	0.0029942	20	65	11	110
250	0.0024805	8	52	14	96
251	0.0026422	11	67	16	123
252	0.0026213	34	74	15	114
253	0.0028191	8	64	10	120
254	0.0029946	33	76	11	119
255	0.0025633	70	105	19	140
256	0.0029745	1	47	8	93
257	0.0027408	6	64	11	122
258	0.003021	4	61	8	118
259	0.0029345	5	57	12	109
260	0.0027145	8	59	17	110
261	0.0029085	19	64	11	109
262	0.0026273	65	89	12	113
263	0.0030772	27	72	14	117
264	0.002976	17	64	14	111
265	0.0026037	66	110	19	154
266	0.0029	33	67	8	101
267	0.0029277	8	60	8	112
268	0.0027772	40	77	11	114
269	0.0026241	4	73	17	142
270	0.002871	20	71	12	122
271	0.0026206	32	76	13	120
272	0.003055	7	64	12	121
273	0.0029093	17	67	11	117
274	0.0026898	0	60	17	120
275	0.0029317	43	81	13	119
276	0.0026292	11	83	18	155
277	0.0028153	56	88	12	120
278	0.0027229	11	63	14	115
279	0.002961	35	86	17	137
280	0.002711	5	71	14	137
281	0.0030833	15	80	10	145
282	0.0030216	12	51	10	90
283	0.0028452	27	76	15	125
284	0.0033086	23	63	12	103
285	0.002969	22	71	12	120
286	0.0029402	9	77	17	145
287	0.0030481	6	65	9	124
288	0.0031275	3	52	9	101
289	0.0026123	21	51	8	81
290	0.0025451	69	116	17	163
291	0.0027442	56	78	13	100
292	0.0028003	12	73	19	134
293	0.0028944	35	69	9	103
294	0.0027295	23	71	14	119
295	0.0030599	20	63	13	106
296	0.0029026	0	57	18	114
297	0.002565	22	80	16	138
298	0.0031077	1	57	11	113
299	0.0029161	2	64	18	126
300	0.0027103	3	67	19	131
301	0.0024782	12	62	9	112
302	0.0027782	24	63	11	102
303	0.0033473	15	56	14	97
304	0.0028236	5	58	17	111
305	0.0029116	8	57	12	106
306	0.0031987	11	51	8	91
307	0.0024795	41	90	16	139
308	0.0030405	7	64	11	121
309	0.0027458	74	103	12	132
310	0.0028266	22	73	9	124
311	0.0030827	9	63	14	117
312	0.0029525	28	72	15	116
313	0.0028815	7	67	12	127
314	0.0028147	3	65	10	127
315	0.0026178	8	66	17	124
316	0.0028313	13	60	17	107
317	0.0026455	14	63	12	112
318	0.0031291	11	55	10	99
319	0.0026401	19	75	12	131
320	0.0026188	31	69	17	107
321	0.0029377	28	67	9	106
322	0.0026745	53	75	17	97
323	0.0029682	15	64	13	113
324	0.0029107	20	70	14	120
325	0.0030978	41	81	11	121
326	0.0028156	27	65	15	103
327	0.0030492	34	70	15	106
328	0.0030438	12	82	10	152
329	0.0028871	28	76	13	124
330	0.0026792	17	73	14	129
331	0.0026458	14	69	14	124
332	0.002785	47	85	14	123
333	0.0027377	20	67	15	114
334	0.0031809	14	53	8	92
335	0.0030822	1	62	9	123
336	0.0028079	37	71	10	105
337	0.0025831	9	61	14	113
338	0.0032639	11	63	15	115
339	0.0029222	27	71	19	115
340	0.0030926	14	60	7	106
341	0.0026545	8	55	19	102
342	0.0027621	9	72	11	135
343	0.0027025	8	44	10	80
344	0.0029255	2	50	11	98
345	0.0027867	6	66	13	126
346	0.0028017	27	82	11	137
347	0.0027621	14	67	16	120
348	0.0025554	10	69	19	128
349	0.0029123	6	49	10	92
350	0.0028939	15	55	10	95
351	0.0027846	35	79	9	123
352	0.0027759	14	63	12	112
353	0.0026381	7	61	11	115
354	0.0030671	10	51	10	92
355	0.0032448	18	65	9	112
356	0.003066	7	69	13	131
357	0.0029987	24	74	11	124
358	0.0028956	23	87	18	151
359	0.0027807	22	60	9	98
360	0.002712	32	92	16	152
361	0.0030604	16	61	11	106
362	0.0029892	8	52	8	96
363	0.0029523	2	40	11	78
364	0.0026829	25	78	18	131
365	0.0029716	34	72	8	110
366	0.0025715	24	73	19	122
367	0.0025063	28	70	11	112
368	0.0032528	1	66	11	131
369	0.0028141	19	61	11	103
370	0.0027967	4	53	11	102
371	0.0030123	70	101	13	132
372	0.003091	2	71	17	140
373	0.0025458	70	110	12	150
374	0.002923	37	86	15	135
375	0.0026817	5	58	7	111
376	0.0028073	3	53	19	103
377	0.0028068	8	54	10	100
378	0.0030109	14	72	11	130
379	0.0030492	2	65	11	128
380	0.0026936	10	70	17	130
381	0.0029136	8	52	13	96
382	0.0029943	42	89	18	136
383	0.0029977	22	63	9	104
384	0.0031551	17	57	10	97
385	0.0027504	22	91	14	160
386	0.0027679	23	56	10	89
387	0.0031818	32	73	8	114
388	0.0028818	14	65	13	116
389	0.0028197	6	53	10	100
390	0.0029633	49	85	11	121
391	0.0026716	5	46	6	87
392	0.0028363	0	51	9	102
393	0.0026347	39	83	16	127
394	0.0030476	11	69	13	127
395	0.0025385	25	75	19	125
396	0.0025557	38	77	12	116
397	0.0024803	13	66	11	119
398	0.0028314	62	95	10	128
399	0.0027499	54	101	19	148
400	0.0025938	17	68	19	119
401	0.0029507	4	55	16	106
402	0.0029434	15	62	8	109
403	0.0028263	4	51	12	98
404	0.0028328	17	83	15	149
405	0.0027736	6	47	11	88
406	0.0033588	2	64	13	126
407	0.0030008	21	74	15	127
408	0.0026913	12	82	11	152
409	0.0025249	19	65	13	111
410	0.0025447	34	77	16	120
411	0.0029904	27	61	10	95
412	0.0026443	27	74	17	121
413	0.0027797	27	84	15	141
414	0.0028521	36	83	13	130
415	0.0028275	50	88	17	126
416	0.0029031	3	63	16	123
417	0.0027594	5	76	16	147
418	0.0031658	6	61	9	116
419	0.0029359	21	78	15	135
420	0.0028099	13	68	13	123
421	0.0029264	17	68	10	119
422	0.0029842	10	57	9	104
423	0.0029562	8	56	12	104
424	0.0027564	17	66	17	115
425	0.0028986	7	61	12	115
426	0.0029601	0	63	16	126
427	0.0031688	7	63	11	119
428	0.0029263	41	88	11	135
429	0.002658	25	70	14	115
430	0.0030138	30	71	9	112
431	0.0027267	7	54	9	101
432	0.0027646	31	75	16	119
433	0.0031238	7	54	9	101
434	0.0028927	1	49	9	97
435	0.0025997	11	66	9	121
436	0.0027125	1	59	13	117
437	0.0029425	28	72	8	116
438	0.002716	22	66	14	110
439	0.0031828	12	61	10	110
440	0.0030322	21	73	15	125
441	0.0026321	3	64	17	125
442	0.0029144	22	83	13	144
443	0.0028525	20	66	12	112
444	0.0026908	18	63	17	108
445	0.0029606	19	82	12	145
446	0.0029932	6	64	11	122
447	0.0025378	7	71	18	135
448	0.0026459	23	87	19	151
449	0.0025894	16	59	13	102
450	0.0027961	8	67	12	126
451	0.0033723	30	64	9	98
452	0.0028347	12	66	10	120
453	0.0029346	42	92	16	142
454	0.0031989	7	59	10	111
455	0.0027977	53	93	12	133
456	0.0029637	7	54	11	101
457	0.0026041	34	83	11	132
458	0.0031563	26	68	10	110
459	0.0032013	35	70	13	105
460	0.0028407	0	63	11	126
461	0.0030048	17	72	18	127
462	0.0028995	5	51	11	97
463	0.0026462	2	63	17	124
464	0.0031713	2	47	7	92
465	0.0035453	15	72	10	129
466	0.0025874	28	76	16	124
467	0.0029648	35	72	11	109
468	0.0028908	26	87	19	148
469	0.0028067	22	68	8	114
470	0.0026021	19	69	10	119
471	0.0027829	7	54	9	101
472	0.0028496	45	82	12	119
473	0.0027454	8	58	13	108
474	0.0025255	13	44	6	75
475	0.0028043	22	66	14	110
476	0.0028979	27	61	11	95
477	0.0026505	24	78	13	132
478	0.0031112	2	58	9	114
479	0.0030511	10	46	11	82
480	0.002784	79	105	10	131
481	0.0025406	8	67	16	126
482	0.0025311	18	66	13	114
483	0.0030189	22	63	18	104
484	0.0027888	46	89	16	132
485	0.0026002	20	71	11	122
486	0.002986	28	70	13	112
487	0.0026316	1	65	15	129
488	0.0026687	40	81	15	122
489	0.0029328	13	63	11	113
490	0.0027897	20	77	14	134
491	0.0027193	26	69	12	112
492	0.0028092	33	94	15	155
493	0.0026812	38	79	16	120
494	0.0025158	62	89	11	116
495	0.0027329	9	53	12	97
496	0.0030143	3	64	9	125
497	0.0025723	3	63	19	123
498	0.0025765	42	91	18	140
499	0.0026348	3	58	14	113
500	0.002728	17	60	10	103
501	0.0026115	10	80	19	150
502	0.002922	14	68	12	122
503	0.0028473	7	54	8	101
504	0.0025716	4	68	18	132
505	0.0029165	20	67	12	114
506	0.0029004	25	56	9	87
507	0.0026726	5	62	18	119
508	0.0029567	0	67	18	134
509	0.0025463	69	93	11	117
510	0.0027454	15	65	18	115
511	0.0025415	12	86	19	160
512	0.0030485	22	58	7	94
513	0.002826	10	60	12	110
514	0.0027881	1	47	10	93
515	0.0028594	7	61	10	115
516	0.0032779	9	56	8	103
517	0.0029369	4	57	11	110
518	0.002684	6	63	13	120
519	0.003124	8	68	11	128
520	0.0029065	2	51	10	100
521	0.002681	13	63	16	113
522	0.0029036	20	74	15	128
523	0.0028932	9	64	15	119
524	0.0029415	3	54	11	105
525	0.0028262	19	61	16	103
526	0.0031748	44	80	15	116
527	0.0028255	44	81	9	118
528	0.0032474	11	55	15	99
529	0.0029869	1	54	8	107
530	0.0026231	6	66	19	126
531	0.0028212	4	60	10	116
532	0.0028774	45	81	13	117
533	0.002789	28	63	10	98
534	0.0028862	8	52	14	96
535	0.0028509	2	58	10	114
536	0.0031176	2	69	19	136
537	0.0027475	12	71	15	130
538	0.0026573	26	63	17	100
539	0.0032217	11	70	10	129
540	0.0026319	11	64	13	117
541	0.0025836	18	59	8	100
542	0.0028777	1	67	18	133
543	0.0028157	26	78	10	130
544	0.0026295	18	72	13	126
545	0.0030392	14	60	10	106
546	0.0028713	6	59	17	112
547	0.0029516	26	63	10	100
548	0.002861	3	64	11	125
549	0.0029095	3	57	10	111
550	0.0028679	1	63	14	125
551	0.0029008	20	75	10	130
552	0.0028918	4	61	10	118
553	0.0030366	2	65	10	128
554	0.0028809	9	63	16	117
555	0.0026822	33	67	13	101
556	0.002875	9	64	17	119
557	0.0030436	51	79	10	107
558	0.0025655	15	61	13	107
559	0.003174	13	62	10	111
560	0.0027729	1	59	11	117
561	0.0027757	17	61	12	105
562	0.0027124	16	50	9	84
563	0.0029317	19	70	10	121
564	0.0026079	9	52	13	95
565	0.0025739	13	54	9	95
566	0.0027796	4	63	10	122
567	0.0029141	32	76	11	120
568	0.002768	43	79	15	115
569	0.0028858	6	54	10	102
570	0.0029095	14	72	11	130
571	0.0026702	26	66	12	106
572	0.003014	35	75	9	115
573	0.0029299	3	48	9	93
574	0.0025604	11	61	10	111
575	0.0028237	5	56	13	107
576	0.0029346	49	77	16	105
577	0.0031115	17	55	8	93
578	0.0026146	3	49	9	95
579	0.0027719	11	51	10	91
580	0.0029657	23	75	12	127
581	0.0030087	22	71	11	120
582	0.0032118	28	80	13	132
583	0.0028768	17	57	9	97
584	0.0028307	20	71	12	122
585	0.0031491	18	67	19	116
586	0.0028532	28	76	18	124
587	0.0029336	30	76	17	122
588	0.0032383	36	78	13	120
589	0.0029733	22	73	10	124
590	0.0028552	20	75	17	130
591	0.0026971	4	64	11	124
592	0.0027825	59	94	11	129
593	0.0025401	6	49	9	92
594	0.0027298	39	71	10	103
595	0.0028081	47	84	10	121
596	0.0029177	27	71	12	115
597	0.0028904	2	76	19	150
598	0.0029478	24	57	10	90
599	0.0029282	1	56	13	111
600	0.0027936	0	48	11	96
601	0.0026798	14	60	11	106
602	0.0029421	19	61	9	103
603	0.0027291	20	64	10	108
604	0.0030967	53	83	15	113
605	0.0027354	55	91	13	127
606	0.0030254	15	65	9	115
607	0.0028966	50	85	15	120
608	0.0030757	7	54	11	101
609	0.0029953	8	62	10	116
610	0.0029281	13	55	10	97
611	0.0027949	26	63	9	100
612	0.0029829	3	62	11	121
613	0.003064	5	60	11	115
614	0.0027225	3	62	13	121
615	0.0028795	7	57	10	107
616	0.0028856	27	74	9	121
617	0.0028978	8	56	11	104
618	0.0029047	6	49	9	92
619	0.003063	35	70	9	105
620	0.0029332	1	48	11	95
621	0.0027155	12	55	10	98
622	0.0029574	10	55	11	100
623	0.0029728	10	70	13	130
624	0.0025279	29	68	11	107
625	0.0028951	12	69	9	126
626	0.0028874	14	69	15	124
627	0.0028159	25	76	16	127
628	0.0029859	34	74	13	114
629	0.0030851	3	43	10	83
630	0.0025522	51	72	12	93
631	0.00253	0	65	18	130
632	0.0027287	5	47	17	89
633	0.0025296	45	77	12	109
634	0.0025787	24	76	12	128
635	0.0028997	16	59	15	102
636	0.0027206	10	54	9	98
637	0.0031343	10	77	19	144
638	0.0028078	7	59	9	111
639	0.0028517	3	57	12	111
640	0.003024	51	97	17	143
641	0.0029288	9	51	11	93
642	0.0034224	14	55	12	96
643	0.0028772	17	64	8	111
644	0.0029421	13	51	8	89
645	0.0027051	23	59	9	95
646	0.0027372	44	77	14	110
647	0.0028945	7	53	9	99
648	0.0027749	8	53	11	98
649	0.0029295	3	57	10	111
650	0.0027331	11	67	19	123
651	0.002777	18	68	17	118
652	0.0029851	6	61	10	116
653	0.0029932	4	61	17	118
654	0.0029843	40	75	11	110
655	0.002861	35	70	12	105
656	0.0026394	13	63	16	113
657	0.002991	18	62	15	106
658	0.002879	24	70	12	116
659	0.002863	5	66	11	127
660	0.0029758	12	72	18	132
661	0.0027673	41	89	16	137
662	0.0027146	2	52	9	102
663	0.0031049	42	82	9	122
664	0.0029766	12	57	18	102
665	0.0030659	16	63	12	110
666	0.0030802	53	93	18	133
667	0.0027331	31	76	10	121
668	0.0027074	35	76	15	117
669	0.0028324	25	76	13	127
670	0.0031199	14	53	9	92
671	0.0025814	30	67	13	104
672	0.0027169	13	53	8	93
673	0.0026586	66	112	17	158
674	0.0028769	5	61	19	117
675	0.0026448	11	77	15	143
676	0.002718	24	65	10	106
677	0.0028669	12	60	11	108
678	0.0028589	0	54	8	108
679	0.0027426	0	49	9	98
680	0.0030097	39	87	13	135
681	0.0028304	26	81	16	136
682	0.0027876	11	58	14	105
683	0.002981	27	75	10	123
684	0.0030481	23	87	18	151
685	0.0027509	24	95	19	166
686	0.0030287	32	86	13	140
687	0.0028046	64	95	16	126
688	0.0027851	12	65	13	118
689	0.0026981	11	65	12	119
690	0.0026425	5	58	16	111
691	0.0028415	17	80	14	143
692	0.0025973	5	63	13	121
693	0.002593	28	80	15	132
694	0.0031398	4	63	11	122
695	0.0031136	3	58	8	113
696	0.0025504	21	76	15	131
697	0.0027357	24	79	10	134
698	0.0025715	40	80	12	120
699	0.0028505	11	56	8	101
700	0.0028273	25	68	16	111
701	0.0025708	51	79	12	107
702	0.0029925	16	68	11	120
703	0.0027463	10	65	17	120
704	0.0028778	26	67	11	108
705	0.0028475	29	75	10	121
706	0.0026076	14	58	10	102
707	0.0027807	2	50	15	98
708	0.0028862	29	69	11	109
709	0.0028138	3	59	10	115
710	0.0028032	35	62	16	89
711	0.0025442	23	69	13	115
712	0.0027761	7	70	18	133
713	0.0026153	29	77	19	125
714	0.0028228	4	56	10	108
715	0.0030937	5	59	10	113
716	0.0027206	20	72	16	124
717	0.0031168	16	66	13	116
718	0.0030147	40	83	10	126
719	0.0030394	36	84	11	132
720	0.0030471	8	68	17	128
721	0.0030729	54	81	11	108
722	0.0028973	1	49	8	97
723	0.0028857	25	79	18	133
724	0.0026936	0	49	13	98
725	0.0027728	14	67	13	120
726	0.0029148	16	58	11	100
727	0.0028783	31	80	13	129
728	0.0027354	3	51	11	99
729	0.0029395	14	63	10	112
730	0.0031182	12	68	10	124
731	0.0030337	37	66	15	95
732	0.0029019	28	84	13	140
733	0.0026366	21	63	9	105
734	0.002945	9	52	9	95
735	0.0026214	24	64	10	104
736	0.0031015	8	58	10	108
737	0.0025435	24	66	10	108
738	0.0028336	75	115	14	155
739	0.0029089	0	57	13	114
740	0.0029411	2	58	16	114
741	0.002764	6	57	9	108
742	0.0028975	5	60	11	115
743	0.0029191	19	69	10	119
744	0.0028756	1	63	10	125
745	0.0030485	28	74	11	120
746	0.0027388	53	87	15	121
747	0.0028964	11	71	12	131
748	0.0031919	17	58	9	99
749	0.0031942	4	58	9	112
750	0.0028386	24	62	10	100
751	0.0030152	12	58	13	104
752	0.0029006	13	65	11	117
753	0.0029218	16	68	17	120
754	0.0028149	26	71	11	116
755	0.0030351	30	81	16	132
756	0.0027554	20	69	19	118
757	0.0028411	29	70	16	111
758	0.0028756	33	75	9	117
759	0.0025368	24	74	15	124
760	0.0027062	35	84	16	133
761	0.0026236	29	55	9	81
762	0.0028378	9	63	11	117
763	0.0027423	6	68	9	130
764	0.002823	2	58	11	114
765	0.0032487	27	68	13	109
766	0.0027918	39	82	9	125
767	0.0029677	2	48	13	94
768	0.0031791	5	60	12	115
769	0.0027103	2	56	12	110
770	0.0029192	15	77	11	139
771	0.0031514	32	90	15	148
772	0.0028364	35	87	19	139
773	0.0030368	12	59	9	106
774	0.0027941	11	54	9	97
775	0.0025017	45	87	11	129
776	0.0028503	19	50	11	81
777	0.0028272	20	65	16	110
778	0.0028051	19	59	11	99
779	0.0027976	17	68	9	119
780	0.0030212	6	56	7	106
781	0.0027902	18	71	13	124
782	0.0026048	24	76	14	128
783	0.0029287	1	54	7	107
784	0.0030039	35	66	11	97
785	0.0025657	14	74	19	134
786	0.0027534	3	55	12	107
787	0.0028487	6	58	9	110
788	0.0028183	14	57	14	100
789	0.0028862	63	93	15	123
790	0.0028751	8	60	11	112
791	0.0029157	4	61	19	118
792	0.0029548	17	70	16	123
793	0.0030523	12	69	15	126
794	0.0026367	13	54	9	95
795	0.0025395	25	77	19	129
796	0.0028065	13	63	17	113
797	0.003126	25	72	13	119
798	0.0028919	7	67	13	127
799	0.0026303	31	67	14	103
800	0.0029473	1	58	14	115
801	0.002982	3	48	17	93
802	0.0028402	9	57	12	105
803	0.002978	21	70	9	119
804	0.0028367	1	70	11	139
805	0.0030112	14	72	12	130
806	0.0028039	7	56	12	105
807	0.0029612	30	64	12	98
808	0.0028086	22	69	15	116
809	0.0029349	12	74	12	136
810	0.003065	16	62	11	108
811	0.0030926	4	65	13	126
812	0.0028449	21	65	12	109
813	0.0034619	9	56	10	103
814	0.002954	12	62	10	112
815	0.0028634	13	51	10	89
816	0.0028661	18	73	11	128
817	0.0026235	39	89	14	139
818	0.0026919	3	55	13	107
819	0.0027713	1	59	11	117
820	0.0029861	5	64	12	123
821	0.0031852	10	67	10	124
822	0.0027098	14	87	18	160
823	0.0026033	35	95	19	155
824	0.0025212	17	63	10	109
825	0.0028802	37	78	12	119
826	0.0029803	16	69	10	122
827	0.0026919	3	63	12	123
828	0.0030994	0	59	12	118
829	0.0027866	4	74	16	144
830	0.0027861	42	82	12	122
831	0.0032856	1	71	11	141
832	0.002861	17	71	16	125
833	0.0025645	47	92	15	137
834	0.0030361	4	63	10	122
835	0.0027429	14	64	12	114
836	0.0027159	2	52	10	102
837	0.0027868	17	60	17	103
838	0.0026056	19	81	19	143
839	0.0029799	7	59	16	111
840	0.0025731	16	62	10	108
841	0.0029395	1	62	16	123
842	0.002584	23	69	12	115
843	0.0029712	5	58	9	111
844	0.0029116	14	66	11	118
845	0.0027152	10	64	18	118
846	0.0027795	28	68	18	108
847	0.0025972	62	92	18	122
848	0.0026936	9	60	7	111
849	0.0034458	66	99	12	132
850	0.0028592	7	49	11	91
851	0.003046	9	53	17	97
852	0.0028599	9	48	7	87
853	0.0028459	16	69	12	122
854	0.0029813	60	85	10	110
855	0.0028142	41	69	8	97
856	0.0028843	21	79	14	137
857	0.003005	34	72	10	110
858	0.002539	9	60	8	111
859	0.0026718	17	67	8	117
860	0.0032149	13	67	9	121
861	0.0028595	13	67	13	121
862	0.0029402	7	57	9	107
863	0.0027739	16	55	8	94
864	0.0028551	16	67	12	118
865	0.0028492	8	67	10	126
866	0.0030449	20	73	14	126
867	0.0027351	11	64	19	117
868	0.003099	9	62	19	115
869	0.0031246	0	53	10	106
870	0.0030319	9	47	7	85
871	0.0027424	25	76	16	127
872	0.003041	25	73	9	121
873	0.0028526	2	68	14	134
874	0.0026618	17	71	15	125
875	0.0029719	21	66	8	111
876	0.0028585	4	68	11	132
877	0.0025924	3	64	13	125
878	0.0028177	8	59	11	110
879	0.0029801	33	73	10	113
880	0.0025844	14	71	15	128
881	0.0031814	4	44	6	84
882	0.0025289	13	67	10	121
883	0.0028296	9	71	9	133
884	0.0032117	1	64	11	127
885	0.0032843	7	56	9	105
886	0.0028445	8	68	14	128
887	0.0025829	12	60	12	108
888	0.0028897	19	68	10	117
889	0.0028724	20	65	9	110
890	0.0027383	7	61	15	115
891	0.0030379	6	59	11	112
892	0.0030149	9	69	18	129
893	0.0031197	13	60	10	107
894	0.0025398	1	57	13	113
895	0.002957	66	89	11	112
896	0.0025262	18	58	12	98
897	0.0032727	11	63	14	115
898	0.0028594	25	66	11	107
899	0.0027371	15	74	13	133
900	0.0031632	31	76	9	121
901	0.0027531	28	66	10	104
902	0.0027157	28	82	13	136
903	0.0031285	17	73	11	129
904	0.002627	15	74	16	133
905	0.0026582	21	68	15	115
906	0.0029085	25	65	9	105
907	0.0029294	27	73	11	119
908	0.002971	32	72	9	112
909	0.0026034	14	64	13	114
910	0.0030812	3	62	12	121
911	0.0028414	9	59	9	109
912	0.0029367	14	62	13	110
913	0.0025432	14	71	17	128
914	0.0030086	6	62	9	118
915	0.002917	1	60	10	119
916	0.0030558	1	53	10	105
917	0.0027938	54	91	14	128
918	0.0028767	25	63	11	101
919	0.002701	38	84	13	130
920	0.0032563	16	69	13	122
921	0.002986	9	63	19	117
922	0.0028107	34	70	10	106
923	0.0029543	11	67	12	123
924	0.0026229	14	74	16	134
925	0.002775	18	65	13	112
926	0.0028114	17	66	15	115
927	0.003061	36	72	11	108
928	0.0029437	7	54	9	101
929	0.003077	6	51	9	96
930	0.0029637	10	65	9	120
931	0.002839	16	69	12	122
932	0.0032385	0	51	10	102
933	0.0030345	17	56	7	95
934	0.00301	4	63	11	122
935	0.0025751	6	64	15	122
936	0.0026082	6	74	17	142
937	0.0033519	20	67	17	114
938	0.0028764	15	65	13	115
939	0.0026448	24	69	14	114
940	0.0028602	12	58	11	104
941	0.0029343	12	69	13	126
942	0.0030874	12	68	12	124
943	0.0027974	15	62	12	109
944	0.0031207	47	81	11	115
945	0.0026935	25	69	10	113
946	0.0028973	42	68	11	94
947	0.0030968	22	77	13	132
948	0.0027302	30	72	11	114
949	0.0026638	20	71	10	122
950	0.0032231	65	98	13	131
951	0.0027141	6	56	10	106
952	0.0028256	5	55	10	105
953	0.0025941	7	65	19	123
954	0.0028353	54	82	11	110
955	0.0027981	6	57	8	108
956	0.0028706	5	60	10	115
957	0.0027638	4	42	12	80
958	0.0027398	3	50	11	97
959	0.0027125	34	62	12	90
960	0.0030256	13	59	13	105
961	0.0030683	54	92	17	130
962	0.0029764	9	69	16	129
963	0.0027685	10	57	10	104
964	0.002822	53	87	13	121
965	0.0028393	59	97	11	135
966	0.0030487	1	58	14	115
967	0.0028994	22	70	11	118
968	0.0028277	17	62	8	107
969	0.0025484	21	59	9	97
970	0.0028718	10	51	7	92
971	0.0030964	26	64	11	102
972	0.002861	8	60	9	112
973	0.0027863	47	76	10	105
974	0.0029477	24	68	10	112
975	0.0030848	18	72	13	126
976	0.002576	42	88	16	134
977	0.0026101	1	57	11	113
978	0.0025246	26	69	8	112
979	0.0029158	39	79	13	119
980	0.0029008	25	75	11	125
981	0.002798	33	77	16	121
982	0.0029173	18	62	10	106
983	0.0029916	49	84	12	119
984	0.0028516	6	53	10	100
985	0.0029217	1	50	10	99
986	0.00309	3	74	19	145
987	0.0030197	1	61	8	121
988	0.0028588	20	72	13	124
989	0.0028631	5	67	10	129
990	0.0030304	15	64	11	113
991	0.0026727	5	60	11	115
992	0.0028215	36	74	10	112
993	0.0028741	46	81	12	116
994	0.0029315	8	56	9	104
995	0.0026094	1	50	10	99
996	0.0031521	6	61	12	116
997	0.0031246	38	78	9	118
998	0.003001	38	78	13	118
999	0.0027144	17	60	11	103
mean	0.00286136	18.504	66.941	12.326	115.378

## Sheet: DACC_D
	time	SEq	Bal	Reg	Egal
0	0.0005556	34	74	8	114
1	0.0004192	39	76	16	113
2	0.0005738	32	71	12	110
3	0.0004615	26	80	13	134
4	0.0004656	12	58	11	104
5	0.0005429	19	69	10	119
6	0.0004621	9	56	11	103
7	0.0005578	31	73	9	115
8	0.0006429	0	58	16	116
9	0.0004534	4	61	11	118
10	0.0003888	14	56	8	98
11	0.0005139	18	64	11	110
12	0.0005803	19	68	10	117
13	0.0004708	13	69	14	125
14	0.0004965	43	71	10	99
15	0.0005209	21	66	10	111
16	0.0005153	3	53	12	103
17	0.000427	2	61	9	120
18	0.0004845	19	55	10	91
19	0.0005003	50	74	11	98
20	0.0004826	5	53	16	101
21	0.0005296	12	55	11	98
22	0.0004649	7	53	17	99
23	0.0005688	5	65	10	125
24	0.0005373	58	91	16	124
25	0.0005973	28	68	10	108
26	0.0006457	39	75	11	111
27	0.0004034	28	57	12	86
28	0.000659	13	59	9	105
29	0.0004456	12	65	8	118
30	0.0005801	28	71	18	114
31	0.0006345	11	65	11	119
32	0.000482	9	56	8	103
33	0.0005547	9	66	18	123
34	0.0005303	1	54	9	107
35	0.0004258	64	97	14	130
36	0.0004219	26	77	14	128
37	0.000558	10	65	15	120
38	0.0003659	58	91	13	124
39	0.0004505	12	68	14	124
40	0.000442	13	56	9	99
41	0.0004893	11	64	13	117
42	0.0004752	16	54	15	92
43	0.0004228	17	65	11	113
44	0.0004348	7	60	9	113
45	0.0003406	25	48	8	71
46	0.0004899	36	82	12	128
47	0.0004795	17	69	16	121
48	0.0005568	19	75	17	131
49	0.000548	7	60	12	113
50	0.0004558	33	68	11	103
51	0.0005305	29	75	13	121
52	0.0006014	74	99	11	124
53	0.0005381	46	95	12	144
54	0.0003633	15	50	15	85
55	0.0003561	4	48	7	92
56	0.0005246	40	79	16	118
57	0.0005792	25	80	16	135
58	0.0003929	34	58	8	82
59	0.0004282	12	61	10	110
60	0.0004064	17	63	10	109
61	0.0003993	3	50	10	97
62	0.0005106	16	63	11	110
63	0.0006003	43	83	11	123
64	0.0004776	6	67	12	128
65	0.0004477	17	66	15	115
66	0.0005173	8	53	13	98
67	0.0005237	9	65	19	121
68	0.0004133	2	55	13	108
69	0.0004973	30	74	19	118
70	0.0006131	6	74	19	142
71	0.0004885	24	75	19	126
72	0.0004729	26	71	14	116
73	0.0004732	28	58	10	88
74	0.0004634	5	68	16	131
75	0.0005381	11	63	19	115
76	0.0004733	25	80	14	135
77	0.0004631	10	59	11	108
78	0.0005049	26	77	13	128
79	0.0005699	12	68	13	124
80	0.0005067	38	71	11	104
81	0.0004862	18	55	10	92
82	0.0005999	59	78	11	97
83	0.0004299	1	43	13	85
84	0.0003774	36	73	9	110
85	0.0004842	3	62	13	121
86	0.0004923	16	68	13	120
87	0.0005009	17	54	7	91
88	0.000456	4	45	10	86
89	0.0003996	18	66	10	114
90	0.0005689	35	73	16	111
91	0.0005716	42	77	14	112
92	0.0004447	10	55	8	100
93	0.0004317	3	55	10	107
94	0.0003566	37	64	14	91
95	0.0005238	6	51	11	96
96	0.0005367	4	59	9	114
97	0.0004532	14	54	9	94
98	0.0004843	28	76	13	124
99	0.0004361	9	52	10	95
100	0.0004961	29	79	15	129
101	0.000418	14	62	10	110
102	0.0004241	3	57	11	111
103	0.0003921	1	49	8	97
104	0.0004537	21	73	19	125
105	0.0004731	80	112	19	144
106	0.0004418	12	66	16	120
107	0.0005393	54	97	15	140
108	0.0004638	24	72	19	120
109	0.0005095	7	62	12	117
110	0.0004532	16	62	13	108
111	0.0006007	7	61	16	115
112	0.0004618	27	57	11	87
113	0.0004354	8	53	11	98
114	0.0005663	15	82	18	149
115	0.0005457	33	65	8	97
116	0.0005299	38	83	13	128
117	0.0005028	13	58	9	103
118	0.0003915	30	69	12	108
119	0.0004111	18	57	8	96
120	0.0004464	10	64	12	118
121	0.000387	8	57	11	106
122	0.0004003	15	61	8	107
123	0.0005627	36	75	13	114
124	0.0003885	32	76	11	120
125	0.0005047	10	71	12	132
126	0.0004256	37	80	13	123
127	0.0004778	29	77	15	125
128	0.000535	25	81	17	137
129	0.0003955	10	61	11	112
130	0.0004917	45	86	18	127
131	0.000744	4	72	11	140
132	0.0004732	5	57	12	109
133	0.0005657	77	110	17	143
134	0.0004809	13	60	8	107
135	0.0004978	11	61	10	111
136	0.0004921	76	111	15	146
137	0.0004023	8	54	12	100
138	0.0005302	24	76	18	128
139	0.0004947	28	73	10	118
140	0.0004479	36	75	17	114
141	0.0005036	30	69	11	108
142	0.000542	9	59	11	109
143	0.0004373	42	81	12	120
144	0.0005058	16	72	11	128
145	0.0005252	50	83	12	116
146	0.0004971	36	68	11	100
147	0.0005129	3	54	10	105
148	0.0004714	42	80	9	118
149	0.0004348	32	76	15	120
150	0.000714	15	72	18	129
151	0.0004186	4	59	17	114
152	0.0005794	23	80	12	137
153	0.0004249	14	66	11	118
154	0.0004889	16	68	11	120
155	0.0005355	4	66	13	128
156	0.0005406	30	66	9	102
157	0.0005623	26	65	10	104
158	0.0004336	24	66	11	108
159	0.0004191	10	55	9	100
160	0.0004708	5	52	8	99
161	0.0004305	22	71	17	120
162	0.0003716	24	56	10	88
163	0.0004933	24	73	17	122
164	0.000453	7	65	14	123
165	0.0005253	41	94	15	147
166	0.0004239	5	55	9	105
167	0.0003969	19	64	11	109
168	0.0004383	8	65	11	122
169	0.0005141	11	72	11	133
170	0.0005786	11	60	14	109
171	0.0005144	15	66	10	117
172	0.000527	14	68	10	122
173	0.0004882	47	74	11	101
174	0.0005431	15	71	11	127
175	0.0005051	40	72	10	104
176	0.0004887	21	63	12	105
177	0.0003836	4	45	12	86
178	0.0005135	27	76	14	125
179	0.0005443	9	67	10	125
180	0.0005619	19	78	10	137
181	0.0004782	27	71	12	115
182	0.0004909	13	63	11	113
183	0.0004127	11	64	17	117
184	0.0004161	59	86	12	113
185	0.0004966	3	55	11	107
186	0.0005769	31	76	13	121
187	0.0005773	12	73	10	134
188	0.0005217	23	77	11	131
189	0.000515	12	56	11	100
190	0.0005559	51	84	11	117
191	0.0006366	14	61	9	108
192	0.000668	12	72	13	132
193	0.0004097	14	65	13	116
194	0.0005114	10	70	9	130
195	0.0004258	7	63	11	119
196	0.000483	14	65	12	116
197	0.0005115	11	68	18	125
198	0.0005128	39	86	17	133
199	0.0004347	4	42	11	80
200	0.0004449	6	70	14	134
201	0.0004778	3	60	11	117
202	0.0004831	31	72	18	113
203	0.0004688	1	55	9	109
204	0.0005072	2	69	18	136
205	0.000536	12	75	19	138
206	0.0003897	5	58	11	111
207	0.0003748	62	92	13	122
208	0.0005056	4	62	13	120
209	0.0005222	14	68	13	122
210	0.0004557	9	67	16	125
211	0.0005075	36	95	17	154
212	0.000584	19	77	18	135
213	0.0005444	17	78	13	139
214	0.0005542	42	88	17	134
215	0.0005793	16	67	15	118
216	0.0005555	38	86	11	134
217	0.0003913	13	59	9	105
218	0.0005028	28	67	9	106
219	0.0005471	49	80	18	111
220	0.0004622	33	74	10	115
221	0.0005429	20	77	15	134
222	0.000359	41	74	11	107
223	0.0003822	2	53	11	104
224	0.0004815	18	69	11	120
225	0.0005941	13	88	19	163
226	0.000528	15	63	10	111
227	0.0003987	13	56	10	99
228	0.0005017	11	76	19	141
229	0.0004746	3	57	10	111
230	0.0005263	24	64	10	104
231	0.0004338	4	69	12	134
232	0.000539	24	67	11	110
233	0.0004454	10	59	10	108
234	0.0004936	3	58	8	113
235	0.0005525	27	73	15	119
236	0.0005678	6	70	18	134
237	0.0005168	22	74	17	126
238	0.0004299	4	61	12	118
239	0.0004781	0	53	11	106
240	0.0006008	21	88	17	155
241	0.0005221	8	63	9	118
242	0.0006071	17	74	16	131
243	0.0004486	18	76	19	134
244	0.0004749	25	65	11	105
245	0.0004408	1	59	12	117
246	0.0006424	57	85	11	113
247	0.0005017	24	79	15	134
248	0.0005267	15	69	11	123
249	0.0004443	7	63	17	119
250	0.0003974	8	52	14	96
251	0.0004465	11	67	16	123
252	0.0004275	34	74	15	114
253	0.0004907	73	107	13	141
254	0.0005765	9	68	13	127
255	0.0004827	70	105	19	140
256	0.0005377	1	47	8	93
257	0.0005459	6	64	11	122
258	0.000477	22	70	8	118
259	0.0004402	5	57	12	109
260	0.000502	18	67	17	116
261	0.0004396	19	64	11	109
262	0.0005867	65	89	12	113
263	0.0004817	19	68	14	117
264	0.000418	17	64	14	111
265	0.0006761	66	110	19	154
266	0.0004495	20	63	8	106
267	0.0004174	21	67	8	113
268	0.0005373	28	74	11	120
269	0.0005061	4	73	17	142
270	0.0005045	20	71	12	122
271	0.0005607	32	76	13	120
272	0.0005081	7	64	12	121
273	0.0005248	17	67	11	117
274	0.000528	0	60	17	120
275	0.0004758	49	85	13	121
276	0.0005297	11	83	18	155
277	0.0004778	56	88	12	120
278	0.0004642	11	63	14	115
279	0.0005022	35	86	17	137
280	0.0004997	21	72	14	123
281	0.0005681	2	76	10	150
282	0.0004226	12	51	10	90
283	0.000448	44	86	15	128
284	0.000543	21	65	9	109
285	0.0005875	22	71	12	120
286	0.0006033	9	77	17	145
287	0.0004975	13	68	10	123
288	0.0004745	23	74	10	125
289	0.0004328	21	51	8	81
290	0.0006144	69	116	17	163
291	0.000582	56	78	13	100
292	0.0005313	12	73	19	134
293	0.0006426	35	69	9	103
294	0.0004563	38	79	14	120
295	0.0004361	41	77	13	113
296	0.00045	39	77	12	115
297	0.0005404	22	80	16	138
298	0.0005056	16	66	11	116
299	0.00056	2	64	18	126
300	0.0005238	3	67	19	131
301	0.0004326	12	62	9	112
302	0.0005476	24	63	11	102
303	0.0004289	8	53	14	98
304	0.0004627	5	58	17	111
305	0.0004442	8	57	12	106
306	0.0004238	11	51	8	91
307	0.0005922	41	90	16	139
308	0.0005694	16	71	11	126
309	0.0005861	29	81	19	133
310	0.0005372	22	73	9	124
311	0.000492	9	63	14	117
312	0.0005464	28	72	15	116
313	0.0005109	7	67	12	127
314	0.0006341	3	65	10	127
315	0.0005157	8	66	17	124
316	0.0004552	34	75	17	116
317	0.0004861	14	63	12	112
318	0.0004795	29	64	10	99
319	0.0005829	19	75	12	131
320	0.0005685	31	69	17	107
321	0.0004189	18	61	9	104
322	0.0005477	42	70	17	98
323	0.0006698	45	82	13	119
324	0.0005128	20	70	14	120
325	0.0006585	10	71	12	132
326	0.0005212	27	65	15	103
327	0.0005106	11	61	15	111
328	0.0005744	12	82	10	152
329	0.0004639	28	76	13	124
330	0.0005281	17	73	14	129
331	0.0005311	14	69	14	124
332	0.0007682	47	85	14	123
333	0.0005106	35	75	15	115
334	0.0004341	54	84	11	114
335	0.000453	21	70	9	119
336	0.0004723	37	71	10	105
337	0.0005452	9	61	14	113
338	0.0005022	37	77	9	117
339	0.0009741	9	63	19	117
340	0.0004694	5	57	7	109
341	0.0004781	8	55	19	102
342	0.000528	9	72	11	135
343	0.0004078	8	44	10	80
344	0.0004289	2	50	11	98
345	0.0006097	4	66	13	128
346	0.0004814	15	78	12	141
347	0.0004682	14	67	16	120
348	0.0005383	10	69	19	128
349	0.000413	6	49	10	92
350	0.0003881	43	68	13	93
351	0.000479	3	70	10	137
352	0.0004858	14	68	12	122
353	0.000512	7	61	11	115
354	0.0003948	10	51	10	92
355	0.0004103	32	70	10	108
356	0.0004521	7	73	13	139
357	0.0005312	12	78	13	144
358	0.0005155	23	87	18	151
359	0.0004249	11	56	10	101
360	0.0005782	32	92	16	152
361	0.0004678	16	61	11	106
362	0.0004483	23	63	15	103
363	0.0003888	46	68	12	90
364	0.000443	30	80	18	130
365	0.0005337	34	72	8	110
366	0.0005415	24	73	19	122
367	0.0004415	28	70	11	112
368	0.0005274	1	67	14	133
369	0.0004436	19	61	11	103
370	0.0004528	23	62	13	101
371	0.0005509	21	79	16	137
372	0.0005836	2	71	17	140
373	0.0005295	70	110	12	150
374	0.0006523	37	86	15	135
375	0.0004966	5	58	7	111
376	0.0004212	26	64	19	102
377	0.0004509	7	55	10	103
378	0.0005791	24	78	11	132
379	0.0004717	2	65	11	128
380	0.0006158	10	70	17	130
381	0.0004673	8	52	13	96
382	0.0006034	42	89	18	136
383	0.0004738	9	60	11	111
384	0.0005895	11	60	13	109
385	0.0006272	22	91	14	160
386	0.0003682	37	64	12	91
387	0.0004561	12	66	10	120
388	0.0004864	13	66	13	119
389	0.0003944	21	57	11	93
390	0.0004915	49	85	11	121
391	0.0004506	5	46	6	87
392	0.0004503	12	55	10	98
393	0.0004988	39	83	16	127
394	0.0004312	11	69	13	127
395	0.0004902	25	75	19	125
396	0.0005347	38	77	12	116
397	0.0005878	13	66	11	119
398	0.0004046	62	95	10	128
399	0.0007361	54	101	19	148
400	0.0004997	17	68	19	119
401	0.0004219	28	67	14	106
402	0.0005039	52	86	11	120
403	0.0004068	3	57	15	111
404	0.0005087	27	90	15	153
405	0.0004718	20	59	14	98
406	0.0003707	20	73	11	126
407	0.0005532	15	72	15	129
408	0.0006424	12	82	11	152
409	0.0005506	19	65	13	111
410	0.0005714	34	77	16	120
411	0.0003632	5	51	10	97
412	0.0004525	27	74	17	121
413	0.0006016	4	74	15	144
414	0.0005239	36	83	13	130
415	0.0004908	35	84	17	133
416	0.000467	18	67	16	116
417	0.000521	20	82	16	144
418	0.0004171	6	61	9	116
419	0.0005141	21	78	15	135
420	0.0004756	13	68	13	123
421	0.0004615	4	62	10	120
422	0.0004264	10	57	9	104
423	0.0004596	8	56	12	104
424	0.0004407	15	67	15	119
425	0.0005036	21	71	13	121
426	0.0004568	0	63	16	126
427	0.0005778	23	75	11	127
428	0.0004773	21	79	11	137
429	0.0004876	25	70	14	115
430	0.0004846	30	71	9	112
431	0.0004584	44	74	12	104
432	0.0004764	58	89	17	120
433	0.0005221	7	54	9	101
434	0.0003586	1	49	9	97
435	0.0004813	11	66	9	121
436	0.0004864	1	59	13	117
437	0.0004556	15	65	8	115
438	0.0004929	22	66	14	110
439	0.000498	12	61	10	110
440	0.0005552	12	73	15	134
441	0.0005487	3	64	17	125
442	0.0005437	8	76	19	144
443	0.0005183	20	66	12	112
444	0.0005504	18	63	17	108
445	0.0004803	19	82	12	145
446	0.0004586	6	64	11	122
447	0.0005413	7	71	18	135
448	0.0005294	23	87	19	151
449	0.0004168	16	59	13	102
450	0.0006602	8	67	12	126
451	0.0004497	3	53	13	103
452	0.0004713	25	76	12	127
453	0.0005831	42	92	16	142
454	0.0004734	54	84	17	114
455	0.0003921	98	117	12	136
456	0.0004864	58	83	11	108
457	0.0004519	34	83	11	132
458	0.0005296	1	65	12	129
459	0.0004493	4	57	13	110
460	0.0004739	0	63	11	126
461	0.0005318	17	72	18	127
462	0.0004208	18	59	10	100
463	0.0004971	2	63	17	124
464	0.0004827	9	52	7	95
465	0.000561	15	72	10	129
466	0.0004452	28	76	16	124
467	0.000478	19	72	11	125
468	0.0005546	9	79	19	149
469	0.0005407	22	68	8	114
470	0.0004792	19	69	10	119
471	0.0003637	1	52	9	103
472	0.0005458	45	82	12	119
473	0.0004797	8	58	13	108
474	0.0003633	13	44	6	75
475	0.0004209	33	73	14	113
476	0.0004413	1	49	11	97
477	0.0005007	24	78	13	132
478	0.0004511	2	58	9	114
479	0.000427	10	46	11	82
480	0.0005784	79	105	10	131
481	0.0005583	8	67	16	126
482	0.0005371	18	66	13	114
483	0.0005513	26	71	11	116
484	0.0005817	46	89	16	132
485	0.0005697	20	71	11	122
486	0.0005089	28	70	13	112
487	0.0005015	1	65	15	129
488	0.0004768	40	81	15	122
489	0.0004535	13	63	11	113
490	0.0004681	20	77	14	134
491	0.0004023	26	69	12	112
492	0.0006232	33	94	15	155
493	0.0004906	10	66	16	122
494	0.0005525	62	89	11	116
495	0.0004162	9	53	12	97
496	0.0005508	47	89	9	131
497	0.0005057	3	63	19	123
498	0.0004836	42	91	18	140
499	0.0004738	3	58	14	113
500	0.0004508	17	60	10	103
501	0.0005008	10	80	19	150
502	0.0008157	14	68	12	122
503	0.0005046	48	81	11	114
504	0.0004697	4	68	18	132
505	0.0004436	20	67	12	114
506	0.0004451	14	51	9	88
507	0.0005056	5	62	18	119
508	0.000558	11	73	18	135
509	0.0005391	69	93	11	117
510	0.0005151	4	60	18	116
511	0.0006981	12	86	19	160
512	0.0004503	8	58	11	108
513	0.0005355	10	60	12	110
514	0.0005009	45	74	10	103
515	0.0005255	7	61	10	115
516	0.0004847	37	75	9	113
517	0.0004355	4	57	11	110
518	0.0003947	6	63	13	120
519	0.0005117	2	64	11	126
520	0.0005322	2	51	10	100
521	0.0005932	13	63	16	113
522	0.00056	20	74	15	128
523	0.0004427	19	71	15	123
524	0.0004792	3	54	11	105
525	0.0004782	19	61	16	103
526	0.0005431	16	68	15	120
527	0.0005012	27	75	9	123
528	0.0004493	11	55	15	99
529	0.0004199	1	54	8	107
530	0.0004597	6	66	19	126
531	0.0005274	4	60	10	116
532	0.000371	45	81	13	117
533	0.0004461	28	63	10	98
534	0.0004849	15	64	14	113
535	0.0005616	47	86	13	125
536	0.0005161	17	77	19	137
537	0.0004987	12	71	15	130
538	0.0004737	26	63	17	100
539	0.0004104	28	80	10	132
540	0.0004689	11	64	13	117
541	0.000505	18	59	8	100
542	0.0005032	1	67	18	133
543	0.0004912	26	78	10	130
544	0.0005062	18	72	13	126
545	0.0006026	2	55	10	108
546	0.0004428	3	59	17	115
547	0.0004879	64	84	10	104
548	0.0004951	48	83	11	118
549	0.0005072	3	57	10	111
550	0.0005011	34	84	17	134
551	0.0004755	31	81	10	131
552	0.0004797	13	68	10	123
553	0.0005782	19	75	13	131
554	0.0005846	9	63	16	117
555	0.000472	33	67	13	101
556	0.000584	0	62	17	124
557	0.0003854	51	79	10	107
558	0.0004668	15	61	13	107
559	0.0004897	13	62	10	111
560	0.0004772	1	59	11	117
561	0.0004657	17	61	12	105
562	0.000455	16	50	9	84
563	0.0005115	19	70	10	121
564	0.0004289	9	52	13	95
565	0.0004004	13	54	9	95
566	0.0004387	16	70	11	124
567	0.0005607	32	76	11	120
568	0.0005675	43	79	15	115
569	0.0004295	6	54	10	102
570	0.0004341	10	72	15	134
571	0.000473	26	66	12	106
572	0.0004668	0	62	11	124
573	0.0004509	3	48	9	93
574	0.0003849	11	61	10	111
575	0.0004662	2	56	13	110
576	0.0005567	49	77	16	105
577	0.0004739	19	65	12	111
578	0.0005178	3	49	9	95
579	0.0003584	11	51	10	91
580	0.0004446	8	71	13	134
581	0.0005308	22	71	11	120
582	0.0005296	10	72	16	134
583	0.0004689	17	57	9	97
584	0.0004655	20	71	12	122
585	0.0004838	18	67	19	116
586	0.0005035	13	70	18	127
587	0.00046	30	76	17	122
588	0.0004964	36	78	13	120
589	0.0004415	22	73	10	124
590	0.0005006	15	77	17	139
591	0.0005799	22	71	14	120
592	0.0004455	87	107	12	127
593	0.0003975	6	49	9	92
594	0.0004628	39	71	10	103
595	0.0005805	13	67	15	121
596	0.0005687	41	78	12	115
597	0.0006099	2	76	19	150
598	0.0003648	6	49	11	92
599	0.0004118	30	72	13	114
600	0.0003835	0	48	11	96
601	0.0003868	15	63	13	111
602	0.0004372	41	74	9	107
603	0.000485	28	68	10	108
604	0.0004884	91	112	16	133
605	0.0005231	55	91	13	127
606	0.0005169	15	69	12	123
607	0.0005145	25	79	16	133
608	0.0004677	22	64	12	106
609	0.0005285	8	62	10	116
610	0.0004289	13	55	10	97
611	0.0005669	26	63	9	100
612	0.000513	55	89	14	123
613	0.000454	5	60	11	115
614	0.0005062	3	62	13	121
615	0.0005492	7	57	10	107
616	0.0004983	27	74	9	121
617	0.0005085	24	66	10	108
618	0.0004427	6	49	9	92
619	0.0004818	35	70	9	105
620	0.0004729	8	53	10	98
621	0.0004218	12	55	10	98
622	0.0004169	20	62	11	104
623	0.000603	14	77	13	140
624	0.0003698	29	68	11	107
625	0.0005088	12	69	9	126
626	0.0004902	14	69	15	124
627	0.0005447	25	76	16	127
628	0.0004445	34	74	13	114
629	0.0004913	17	50	10	83
630	0.0005244	51	72	12	93
631	0.0005719	0	65	18	130
632	0.0003958	23	60	17	97
633	0.0005044	45	77	12	109
634	0.0004792	24	76	12	128
635	0.0005258	16	59	15	102
636	0.00045	10	54	9	98
637	0.0005449	10	77	19	144
638	0.000546	34	75	13	116
639	0.000433	3	57	12	111
640	0.0005616	33	89	17	145
641	0.0004941	9	51	11	93
642	0.0005559	61	91	12	121
643	0.0004785	17	64	8	111
644	0.0004059	13	51	8	89
645	0.0004566	23	59	9	95
646	0.0005427	16	70	16	124
647	0.0005622	7	53	9	99
648	0.0004402	8	53	11	98
649	0.0005398	51	92	12	133
650	0.0005316	11	67	19	123
651	0.0004554	8	66	17	124
652	0.0003913	6	61	10	116
653	0.0006176	53	90	14	127
654	0.0005399	21	67	11	113
655	0.0004925	35	70	12	105
656	0.0005252	13	63	16	113
657	0.0004047	18	62	15	106
658	0.0005433	24	70	12	116
659	0.0006605	32	79	11	126
660	0.0005731	12	72	18	132
661	0.0004687	41	89	16	137
662	0.0004108	21	62	10	103
663	0.0005579	18	72	9	126
664	0.0004545	12	57	18	102
665	0.0004535	16	63	12	110
666	0.0005355	53	93	18	133
667	0.000467	31	76	10	121
668	0.0004727	9	66	15	123
669	0.0006215	25	76	13	127
670	0.000434	14	53	9	92
671	0.0004855	30	67	13	104
672	0.0004801	13	53	8	93
673	0.0004778	66	112	17	158
674	0.0005036	22	72	19	122
675	0.0004525	11	77	15	143
676	0.0005185	29	68	10	107
677	0.0004395	12	60	11	108
678	0.0004992	0	54	8	108
679	0.0004796	0	49	9	98
680	0.0005622	39	87	13	135
681	0.0004903	26	81	16	136
682	0.0004398	11	58	14	105
683	0.0005289	27	75	10	123
684	0.0005659	23	87	18	151
685	0.0006721	24	95	19	166
686	0.0006757	13	79	19	145
687	0.0005613	64	95	16	126
688	0.0004771	17	67	13	117
689	0.00044	11	65	12	119
690	0.0005006	5	58	16	111
691	0.0005924	17	80	14	143
692	0.0004692	5	63	13	121
693	0.0006492	28	80	15	132
694	0.0005239	17	74	14	131
695	0.0005015	3	58	8	113
696	0.0004877	21	76	15	131
697	0.0006333	24	79	10	134
698	0.0004044	40	80	12	120
699	0.0004368	5	55	13	105
700	0.0007884	34	74	16	114
701	0.0004334	51	79	12	107
702	0.0004723	41	83	11	125
703	0.0005295	10	65	17	120
704	0.0004201	32	70	11	108
705	0.0005504	29	75	10	121
706	0.0005463	14	58	10	102
707	0.0005708	2	50	15	98
708	0.0003769	29	69	11	109
709	0.000595	3	59	10	115
710	0.0003756	53	77	16	101
711	0.0004537	23	69	13	115
712	0.0004667	7	70	18	133
713	0.0004055	29	77	19	125
714	0.0004774	4	56	10	108
715	0.0004577	13	64	10	115
716	0.000498	20	72	16	124
717	0.0006509	16	66	13	116
718	0.0005677	28	78	10	128
719	0.0005107	36	84	11	132
720	0.0005615	8	68	17	128
721	0.000493	16	65	11	114
722	0.000432	17	59	12	101
723	0.0005314	10	72	18	134
724	0.000427	0	49	13	98
725	0.0004578	14	67	13	120
726	0.0004589	16	58	11	100
727	0.0005677	31	80	13	129
728	0.000426	13	58	11	103
729	0.0004848	14	63	10	112
730	0.0004012	3	63	10	123
731	0.0004507	13	56	14	99
732	0.0005062	28	84	13	140
733	0.0004605	21	63	9	105
734	0.0003427	9	52	9	95
735	0.0004696	24	64	10	104
736	0.000496	8	58	10	108
737	0.0004524	24	66	10	108
738	0.0005733	75	115	14	155
739	0.0005278	53	87	13	121
740	0.0004733	19	72	16	125
741	0.0004435	6	57	9	108
742	0.0004211	5	60	11	115
743	0.0003518	40	80	10	120
744	0.000473	1	63	10	125
745	0.0005198	4	64	13	124
746	0.0004414	53	87	15	121
747	0.0006462	11	71	12	131
748	0.0004525	17	58	9	99
749	0.0004129	22	70	9	118
750	0.0005298	13	57	10	101
751	0.0004569	12	58	13	104
752	0.0005038	13	65	11	117
753	0.0005144	36	83	17	130
754	0.0004961	26	71	11	116
755	0.0006266	30	81	16	132
756	0.0004514	20	69	19	118
757	0.0005404	29	70	16	111
758	0.0004901	56	88	9	120
759	0.000498	24	74	15	124
760	0.0005407	2	68	16	134
761	0.0004729	29	55	9	81
762	0.0004947	4	61	11	118
763	0.0011451	6	68	9	130
764	0.0005185	2	58	11	114
765	0.0004796	27	68	13	109
766	0.0004592	39	82	9	125
767	0.0004888	10	61	13	112
768	0.0004553	5	60	12	115
769	0.0004502	20	65	11	110
770	0.0005064	15	77	11	139
771	0.0005214	15	84	15	153
772	0.0005833	35	87	19	139
773	0.0004349	42	78	11	114
774	0.0004116	9	53	9	97
775	0.0004334	45	87	11	129
776	0.0003605	1	42	11	83
777	0.0004853	3	57	16	111
778	0.0004445	9	62	18	115
779	0.0005319	17	68	9	119
780	0.0005011	23	68	16	113
781	0.0004852	18	71	13	124
782	0.0005253	24	76	14	128
783	0.0005345	1	54	7	107
784	0.0005249	35	66	11	97
785	0.0005477	14	74	19	134
786	0.0004656	3	55	12	107
787	0.0005286	18	66	14	114
788	0.0004432	14	57	14	100
789	0.0005558	30	81	19	132
790	0.0005127	8	60	11	112
791	0.0004946	4	61	19	118
792	0.0004801	14	73	19	132
793	0.0004509	22	79	18	136
794	0.0004497	13	54	9	95
795	0.0005497	25	77	19	129
796	0.0004902	13	63	17	113
797	0.0004856	25	72	13	119
798	0.0004441	7	67	13	127
799	0.0004892	31	67	14	103
800	0.0004673	1	58	14	115
801	0.0004568	3	48	17	93
802	0.0004785	9	57	12	105
803	0.0005257	17	69	9	121
804	0.0005577	24	79	12	134
805	0.000558	28	81	12	134
806	0.0003923	7	56	12	105
807	0.0004564	30	64	12	98
808	0.0004474	29	80	17	131
809	0.0004624	12	74	12	136
810	0.0004397	42	82	11	122
811	0.0005104	4	65	13	126
812	0.0004036	10	61	16	112
813	0.000421	17	59	12	101
814	0.0003712	69	94	11	119
815	0.0004819	13	51	10	89
816	0.0005843	2	65	12	128
817	0.0005773	39	89	14	139
818	0.000476	3	55	13	107
819	0.0005085	1	59	11	117
820	0.0004871	6	64	12	122
821	0.0005128	4	65	10	126
822	0.0005197	14	87	18	160
823	0.0006041	35	95	19	155
824	0.0003955	17	63	10	109
825	0.0004512	5	64	13	123
826	0.0004045	0	60	10	120
827	0.0004719	3	63	12	123
828	0.0004971	8	64	11	120
829	0.0005081	12	76	16	140
830	0.0005105	11	70	14	129
831	0.000599	1	71	11	141
832	0.0005147	17	71	16	125
833	0.000622	47	92	15	137
834	0.0005285	4	63	10	122
835	0.0005405	6	58	12	110
836	0.0004424	15	59	9	103
837	0.0004209	17	60	17	103
838	0.0005583	19	81	19	143
839	0.0004908	7	59	16	111
840	0.0004724	16	62	10	108
841	0.0005181	34	80	14	126
842	0.0004951	23	69	12	115
843	0.0004549	5	58	9	111
844	0.0004519	9	64	11	119
845	0.0005166	2	62	18	122
846	0.0004276	47	79	18	111
847	0.0005675	62	92	18	122
848	0.0004342	9	60	7	111
849	0.0004603	51	92	12	133
850	0.0004095	7	49	11	91
851	0.0005083	11	56	15	101
852	0.0003806	1	45	10	89
853	0.0005227	16	69	12	122
854	0.0003697	67	85	15	103
855	0.0004974	3	56	16	109
856	0.0005639	21	79	14	137
857	0.000681	85	106	15	127
858	0.0005705	9	60	8	111
859	0.000516	17	67	8	117
860	0.0004719	15	72	10	129
861	0.0004078	2	62	16	122
862	0.0006586	30	71	11	112
863	0.0004139	9	55	11	101
864	0.0004048	16	67	12	118
865	0.0005669	8	67	10	126
866	0.0005213	47	88	14	129
867	0.0004419	19	70	19	121
868	0.0005048	12	66	19	120
869	0.0004087	0	53	10	106
870	0.0003603	9	47	7	85
871	0.0005401	25	76	16	127
872	0.0004043	58	93	14	128
873	0.0005563	2	68	14	134
874	0.0004697	17	71	15	125
875	0.0004626	10	62	8	114
876	0.0005132	4	69	12	134
877	0.0005344	3	64	13	125
878	0.0004181	13	61	11	109
879	0.0005165	57	87	13	117
880	0.000536	14	71	15	128
881	0.0004481	27	55	9	83
882	0.0004049	13	67	10	121
883	0.0004663	9	71	9	133
884	0.0004926	1	64	11	127
885	0.0005162	15	61	9	107
886	0.000573	8	68	14	128
887	0.0006245	12	60	12	108
888	0.0004739	19	68	10	117
889	0.0004594	3	59	9	115
890	0.0005307	7	61	15	115
891	0.000472	6	59	11	112
892	0.0004808	9	69	18	129
893	0.0004618	5	57	10	109
894	0.0005305	1	57	13	113
895	0.0004599	66	89	11	112
896	0.0004075	18	58	12	98
897	0.0004423	11	63	14	115
898	0.0004385	6	58	16	110
899	0.0005152	15	74	13	133
900	0.0005245	31	76	9	121
901	0.0005344	28	66	10	104
902	0.000487	28	82	13	136
903	0.000563	17	73	11	129
904	0.0005164	15	74	16	133
905	0.0004548	21	68	15	115
906	0.0005449	25	65	9	105
907	0.0004354	27	73	11	119
908	0.0005033	32	72	9	112
909	0.0004329	14	64	13	114
910	0.000487	3	62	12	121
911	0.0005685	38	78	12	118
912	0.000452	28	71	13	114
913	0.0005503	14	71	17	128
914	0.0005461	19	65	10	111
915	0.0003989	68	93	15	118
916	0.0004314	1	53	10	105
917	0.0005952	54	91	14	128
918	0.000446	25	63	11	101
919	0.0005664	38	84	13	130
920	0.0005483	16	69	13	122
921	0.0005169	9	63	19	117
922	0.0004137	12	60	10	108
923	0.0005402	11	67	12	123
924	0.0005279	14	74	16	134
925	0.0004912	2	57	13	112
926	0.0004867	17	66	15	115
927	0.000515	31	80	16	129
928	0.0004588	7	54	9	101
929	0.0004005	6	51	9	96
930	0.000499	10	65	9	120
931	0.0005291	16	69	12	122
932	0.0003706	0	51	10	102
933	0.000424	12	54	7	96
934	0.0004442	4	63	11	122
935	0.0004912	6	64	15	122
936	0.0005293	6	74	17	142
937	0.0004828	39	80	15	121
938	0.0004537	15	65	13	115
939	0.0005325	24	69	14	114
940	0.0005661	41	73	9	105
941	0.0005229	12	69	13	126
942	0.0004892	47	90	13	133
943	0.0005156	15	62	12	109
944	0.0005368	37	78	11	119
945	0.0004786	10	63	10	116
946	0.0005178	46	70	11	94
947	0.0005017	41	77	14	113
948	0.0004958	10	66	16	122
949	0.0004844	20	71	10	122
950	0.0005517	52	94	13	136
951	0.0004679	6	56	10	106
952	0.0006208	5	55	10	105
953	0.0004785	7	65	19	123
954	0.0005017	54	82	11	110
955	0.0004894	6	57	8	108
956	0.0004848	5	60	10	115
957	0.0004529	4	42	12	80
958	0.0004933	3	50	11	97
959	0.0003347	51	73	12	95
960	0.0003935	6	59	15	112
961	0.000569	15	76	16	137
962	0.0005274	9	69	16	129
963	0.0004823	10	57	10	104
964	0.0004893	53	87	13	121
965	0.0004797	59	97	11	135
966	0.000554	44	85	12	126
967	0.0005145	22	70	11	118
968	0.0004863	5	56	9	107
969	0.0003952	21	59	9	97
970	0.0004511	27	59	9	91
971	0.0004454	26	64	11	102
972	0.0004642	8	60	9	112
973	0.0004636	21	66	10	111
974	0.000511	39	73	13	107
975	0.0005271	2	67	13	132
976	0.0004667	42	88	16	134
977	0.0005372	1	57	11	113
978	0.0005721	26	69	8	112
979	0.0005809	32	76	13	120
980	0.0005383	25	75	11	125
981	0.0005267	33	77	16	121
982	0.0004067	18	62	10	106
983	0.0004024	49	84	12	119
984	0.0004275	43	77	13	111
985	0.0004545	1	50	10	99
986	0.0004955	3	74	19	145
987	0.000554	1	61	8	121
988	0.000574	48	87	13	126
989	0.00043	5	67	10	129
990	0.0004036	42	78	11	114
991	0.0004348	5	60	11	115
992	0.000517	36	74	10	112
993	0.0004629	23	70	12	117
994	0.0003884	8	56	9	104
995	0.0005294	1	50	10	99
996	0.0005674	6	61	12	116
997	0.0004719	13	69	12	125
998	0.0004372	5	70	13	135
999	0.0005679	17	60	11	103
mean	0.000495227	20.399	68.751	12.694	117.103

## Sheet: PowerBalance_SEq
	time	SEq	Bal	Reg	Egal
0	0.000474	34	74	8	114
1	0.0004441	6	55	11	104
2	0.0004815	32	71	12	110
3	0.0005044	24	83	16	142
4	0.0004505	12	58	11	104
5	0.0004537	7	60	10	113
6	0.0003236	9	56	11	103
7	0.0004841	15	70	8	125
8	0.0004599	34	74	16	114
9	0.0003459	4	61	11	118
10	0.0021419	14	56	8	98
11	0.0004645	18	64	11	110
12	0.0004509	19	68	10	117
13	0.0004715	13	69	14	125
14	0.000454	43	71	10	99
15	0.0004541	21	66	10	111
16	0.0002993	3	53	12	103
17	0.0003445	2	61	9	120
18	0.0004571	19	55	10	91
19	0.0004745	50	74	11	98
20	0.0004774	5	53	16	101
21	0.0004435	12	55	11	98
22	0.0003677	7	53	17	99
23	0.0004743	5	65	10	125
24	0.0004678	7	61	12	115
25	0.000469	28	68	10	108
26	0.000688	6	63	11	120
27	0.0004825	8	45	8	82
28	0.0004748	13	59	9	105
29	0.0004597	4	62	9	120
30	0.0004351	28	71	18	114
31	0.0005468	11	65	11	119
32	0.0004498	9	56	8	103
33	0.0004432	9	66	18	123
34	0.0003915	1	54	9	107
35	0.0004649	29	77	10	125
36	0.0005537	26	77	14	128
37	0.0003491	10	65	15	120
38	0.0004499	14	69	12	124
39	0.0003416	12	68	14	124
40	0.0005021	13	56	9	99
41	0.0003549	11	64	13	117
42	0.0003208	1	47	15	93
43	0.0004781	10	62	12	114
44	0.0003525	7	60	9	113
45	0.0003759	5	42	8	79
46	0.0004515	17	70	12	123
47	0.0004586	17	69	16	121
48	0.0004669	16	72	17	128
49	0.0004983	16	67	12	118
50	0.0005226	33	68	11	103
51	0.0004862	29	75	13	121
52	0.0004557	74	99	11	124
53	0.000564	10	74	17	138
54	0.0004404	15	50	15	85
55	0.0002797	12	52	7	92
56	0.0004497	40	79	16	118
57	0.0004764	25	80	16	135
58	0.0005481	15	48	8	81
59	0.0003152	12	61	10	110
60	0.0002875	0	51	7	102
61	0.000372	3	50	10	97
62	0.0004424	16	63	11	110
63	0.0004567	11	59	12	107
64	0.0004857	6	67	12	128
65	0.0003532	2	60	15	118
66	0.000313	8	53	13	98
67	0.0003205	4	62	19	120
68	0.0003274	2	55	13	108
69	0.0004854	30	74	19	118
70	0.0004813	6	74	19	142
71	0.0005352	24	75	19	126
72	0.0004477	4	67	15	130
73	0.0005156	28	58	10	88
74	0.0004804	5	68	16	131
75	0.000448	11	63	19	115
76	0.0004615	25	80	14	135
77	0.0004484	10	59	11	108
78	0.0004818	26	77	13	128
79	0.000516	12	68	13	124
80	0.0004604	17	60	11	103
81	0.0003192	7	47	10	87
82	0.0004893	59	78	11	97
83	0.0002985	1	43	13	85
84	0.0003354	7	58	12	109
85	0.0004689	3	62	13	121
86	0.0004452	16	68	13	120
87	0.0004429	17	54	7	91
88	0.0003539	4	45	10	86
89	0.0004377	2	57	9	112
90	0.0004547	35	73	16	111
91	0.0003549	14	66	16	118
92	0.0003278	10	55	8	100
93	0.000324	3	55	10	107
94	0.0004406	37	64	14	91
95	0.0003308	6	51	11	96
96	0.0004903	4	59	9	114
97	0.0004695	14	54	9	94
98	0.0004666	28	76	13	124
99	0.0003313	9	52	10	95
100	0.0005198	29	79	15	129
101	0.0003878	4	59	11	114
102	0.0003202	3	57	11	111
103	0.0003244	1	49	8	97
104	0.0004711	21	73	19	125
105	0.0005011	3	70	8	137
106	0.0004699	18	65	18	112
107	0.0004532	14	70	10	126
108	0.0004455	13	67	19	121
109	0.0004488	7	62	12	117
110	0.0004843	13	58	11	103
111	0.0003701	7	61	16	115
112	0.0004294	27	57	11	87
113	0.0004584	8	53	11	98
114	0.0004567	15	82	18	149
115	0.0005075	33	65	8	97
116	0.0004719	15	70	10	125
117	0.0003023	13	58	9	103
118	0.00046	24	72	10	120
119	0.0004617	18	57	8	96
120	0.0004687	10	64	12	118
121	0.0002918	8	57	11	106
122	0.0005209	15	62	14	109
123	0.0004774	36	75	13	114
124	0.0004765	13	61	9	109
125	0.0004468	19	73	12	127
126	0.0003359	8	60	13	112
127	0.0003399	21	59	7	97
128	0.0004845	25	81	17	137
129	0.0004922	10	61	11	112
130	0.0005068	24	79	18	134
131	0.0003431	4	72	11	140
132	0.0003527	5	57	12	109
133	0.0004856	77	110	17	143
134	0.0005559	8	58	11	108
135	0.0004517	11	61	10	111
136	0.0004616	46	91	14	136
137	0.0004714	8	54	12	100
138	0.000475	24	76	18	128
139	0.0004735	28	73	10	118
140	0.0004584	16	63	17	110
141	0.0004811	30	69	11	108
142	0.0003621	9	59	11	109
143	0.0004663	21	75	14	129
144	0.0004847	9	69	10	129
145	0.0004524	10	59	12	108
146	0.0004725	36	68	11	100
147	0.0003001	3	54	10	105
148	0.0003267	5	61	11	117
149	0.0004463	3	60	12	117
150	0.0004852	4	67	18	130
151	0.0003678	2	57	17	112
152	0.0004533	10	69	12	128
153	0.0004531	11	63	13	115
154	0.0003602	16	68	11	120
155	0.0004866	4	66	13	128
156	0.0004739	17	61	12	105
157	0.0004436	26	65	10	104
158	0.0004441	4	53	14	102
159	0.0004704	10	55	9	100
160	0.0003061	5	52	8	99
161	0.0005081	4	58	17	112
162	0.0003352	2	43	10	84
163	0.0004745	24	73	17	122
164	0.0004926	7	65	14	123
165	0.0004849	41	94	15	147
166	0.0004547	5	55	9	105
167	0.0004986	19	64	11	109
168	0.0005466	3	64	11	125
169	0.0004647	10	70	16	130
170	0.0004647	11	60	14	109
171	0.0004908	15	66	10	117
172	0.0005252	14	68	10	122
173	0.0004745	28	69	10	110
174	0.0004457	15	71	11	127
175	0.0005276	22	67	13	112
176	0.0004606	8	58	11	108
177	0.0003658	4	45	12	86
178	0.0004927	2	63	12	124
179	0.0004621	29	84	13	139
180	0.0004609	19	78	10	137
181	0.000461	27	71	12	115
182	0.0004557	13	63	11	113
183	0.0005242	11	64	17	117
184	0.0003392	32	71	12	110
185	0.0003445	3	55	11	107
186	0.0004702	31	76	13	121
187	0.0004646	7	71	11	135
188	0.0003513	23	77	11	131
189	0.0003871	12	56	11	100
190	0.0005211	51	84	11	117
191	0.0004717	7	58	9	109
192	0.0004221	0	65	13	130
193	0.0003123	8	59	11	110
194	0.0004621	12	72	13	132
195	0.0004886	7	63	11	119
196	0.0004417	14	65	12	116
197	0.0004433	11	68	18	125
198	0.000351	6	65	13	124
199	0.0003442	4	42	11	80
200	0.0005336	6	70	14	134
201	0.0003493	3	60	11	117
202	0.0004429	31	72	18	113
203	0.0003103	1	55	9	109
204	0.0004579	2	69	18	136
205	0.0004674	0	67	19	134
206	0.0004487	15	58	11	101
207	0.000458	32	73	11	114
208	0.000471	41	84	12	127
209	0.0004593	14	68	13	122
210	0.0004353	9	67	16	125
211	0.0004559	17	81	16	145
212	0.0003509	19	77	18	135
213	0.0003633	17	78	13	139
214	0.0004791	42	88	17	134
215	0.0004728	16	67	15	118
216	0.0005476	38	86	11	134
217	0.0005562	13	59	9	105
218	0.0004856	8	65	9	122
219	0.0004765	49	80	18	111
220	0.0004905	16	68	14	120
221	0.0004676	20	77	15	134
222	0.0004507	4	49	9	94
223	0.0003506	2	53	11	104
224	0.0003206	1	56	11	111
225	0.0004972	13	88	19	163
226	0.0004535	5	58	7	111
227	0.0005346	13	56	10	99
228	0.0004419	11	76	19	141
229	0.0002937	3	57	10	111
230	0.0004564	24	64	10	104
231	0.0007154	4	69	12	134
232	0.0003373	24	67	11	110
233	0.0004795	10	59	10	108
234	0.0004798	3	58	8	113
235	0.0004734	14	67	15	120
236	0.0004615	6	70	18	134
237	0.0004746	22	74	17	126
238	0.0003624	4	61	12	118
239	0.000497	11	59	10	107
240	0.0004619	21	88	17	155
241	0.0003377	8	63	9	118
242	0.0004396	17	74	16	131
243	0.0004538	16	68	13	120
244	0.0004558	25	65	11	105
245	0.0004506	1	59	12	117
246	0.0004711	8	61	12	114
247	0.0003486	5	66	12	127
248	0.0004778	15	69	11	123
249	0.0004541	7	63	17	119
250	0.000439	8	52	14	96
251	0.0004587	11	67	16	123
252	0.0004666	34	74	15	114
253	0.0004626	8	64	10	120
254	0.000526	33	76	11	119
255	0.0005472	70	105	19	140
256	0.0002937	1	47	8	93
257	0.0003311	6	64	11	122
258	0.0004223	4	61	8	118
259	0.0004757	5	57	12	109
260	0.0004565	8	59	17	110
261	0.0004476	19	64	11	109
262	0.0004761	65	89	12	113
263	0.0004488	10	64	14	118
264	0.0004621	22	68	14	114
265	0.0005049	66	110	19	154
266	0.0004542	18	63	14	108
267	0.0003018	8	60	8	112
268	0.0004698	28	74	11	120
269	0.0004646	4	73	17	142
270	0.0004606	20	71	12	122
271	0.0004445	32	76	13	120
272	0.0004713	7	64	12	121
273	0.0004721	17	67	11	117
274	0.0004658	0	60	17	120
275	0.0004685	43	81	13	119
276	0.0004613	11	83	18	155
277	0.000463	56	88	12	120
278	0.0004944	11	63	14	115
279	0.0003722	0	71	18	142
280	0.0004773	5	71	14	137
281	0.0004733	2	76	10	150
282	0.0004515	12	51	10	90
283	0.000446	27	76	15	125
284	0.0004888	23	63	12	103
285	0.0005025	22	71	12	120
286	0.0004688	9	77	17	145
287	0.0005161	6	65	9	124
288	0.0004762	3	52	9	101
289	0.000496	21	51	8	81
290	0.0005559	69	116	17	163
291	0.0004793	56	78	13	100
292	0.0004514	12	73	19	134
293	0.0004672	35	69	9	103
294	0.0004589	23	71	14	119
295	0.0004453	20	63	13	106
296	0.0004553	0	57	18	114
297	0.0004692	22	80	16	138
298	0.0004523	1	57	11	113
299	0.0004533	2	64	18	126
300	0.0003562	3	67	19	131
301	0.0004719	12	62	9	112
302	0.0004766	24	63	11	102
303	0.0003341	8	53	14	98
304	0.0003589	5	58	17	111
305	0.0004513	8	57	12	106
306	0.0004531	11	51	8	91
307	0.0005043	41	90	16	139
308	0.0004727	7	64	11	121
309	0.0004627	29	81	19	133
310	0.0004775	22	73	9	124
311	0.0004522	9	63	14	117
312	0.0004843	28	72	15	116
313	0.0004424	7	67	12	127
314	0.000341	22	73	10	124
315	0.000454	8	66	17	124
316	0.0004966	17	63	17	109
317	0.0005097	14	63	12	112
318	0.0003254	11	55	10	99
319	0.00047	19	75	12	131
320	0.0004861	31	69	17	107
321	0.0004743	18	61	9	104
322	0.0004504	42	70	17	98
323	0.0004387	15	64	13	113
324	0.0004549	11	68	16	125
325	0.0004593	23	73	11	123
326	0.0004643	27	65	15	103
327	0.0004647	11	61	15	111
328	0.0004733	12	82	10	152
329	0.000447	28	76	13	124
330	0.0004822	17	73	14	129
331	0.0004801	14	69	14	124
332	0.0004853	47	85	14	123
333	0.0004439	20	67	15	114
334	0.0004851	14	53	8	92
335	0.0003864	1	62	9	123
336	0.0004923	37	71	10	105
337	0.0005117	9	61	14	113
338	0.0004871	11	63	15	115
339	0.0004452	9	63	19	117
340	0.0004624	5	57	7	109
341	0.0004479	8	55	19	102
342	0.0004907	9	72	11	135
343	0.0002915	8	44	10	80
344	0.0006531	2	50	11	98
345	0.0004661	4	66	13	128
346	0.0004883	15	78	12	141
347	0.0004591	14	67	16	120
348	0.0005034	10	69	19	128
349	0.0003265	6	49	10	92
350	0.0004643	15	55	10	95
351	0.0004811	3	70	10	137
352	0.000454	14	63	12	112
353	0.0004625	7	61	11	115
354	0.000312	10	51	10	92
355	0.0004693	18	65	9	112
356	0.0004503	7	69	13	131
357	0.0004682	1	69	13	137
358	0.0004544	23	87	18	151
359	0.0003469	11	56	10	101
360	0.0005172	32	92	16	152
361	0.0004546	16	61	11	106
362	0.000485	16	57	8	98
363	0.0002534	2	40	11	78
364	0.0003444	30	80	18	130
365	0.0004781	34	72	8	110
366	0.0004488	24	73	19	122
367	0.0003327	28	70	11	112
368	0.0004744	17	73	14	129
369	0.0004687	19	61	11	103
370	0.0003362	4	53	11	102
371	0.0005053	21	79	16	137
372	0.0004872	7	74	17	141
373	0.0004905	70	110	12	150
374	0.0004385	22	80	15	138
375	0.000459	5	58	7	111
376	0.0003277	3	53	19	103
377	0.0003182	8	54	10	100
378	0.000458	14	72	11	130
379	0.0004105	2	65	11	128
380	0.0005483	10	70	17	130
381	0.0004464	8	52	13	96
382	0.0004724	42	89	18	136
383	0.0004669	9	60	11	111
384	0.0004697	11	60	13	109
385	0.0004589	22	91	14	160
386	0.0004414	23	56	10	89
387	0.000348	5	61	9	117
388	0.0004859	14	65	13	116
389	0.0004443	6	53	10	100
390	0.0005645	49	85	11	121
391	0.0003565	5	46	6	87
392	0.0005511	12	55	10	98
393	0.0004695	39	83	16	127
394	0.0004223	11	69	13	127
395	0.0004367	25	75	19	125
396	0.0004682	38	77	12	116
397	0.0004813	13	66	11	119
398	0.0004869	48	91	10	134
399	0.0004599	54	101	19	148
400	0.000461	17	68	19	119
401	0.0003351	4	55	16	106
402	0.0004684	5	59	8	113
403	0.0003328	9	57	12	105
404	0.0004855	17	83	15	149
405	0.0003689	6	47	11	88
406	0.0003291	2	64	13	126
407	0.0004591	15	72	15	129
408	0.000464	12	82	11	152
409	0.0004921	19	65	13	111
410	0.0004547	34	77	16	120
411	0.0003318	5	51	10	97
412	0.0004619	27	74	17	121
413	0.0005456	4	74	15	144
414	0.0004594	36	83	13	130
415	0.000476	35	84	17	133
416	0.0003307	3	63	16	123
417	0.0005876	5	76	16	147
418	0.0003296	6	61	9	116
419	0.0005534	4	70	15	136
420	0.0004755	13	68	13	123
421	0.0004933	4	62	10	120
422	0.0004686	18	61	12	104
423	0.0004622	8	56	12	104
424	0.0004443	15	67	15	119
425	0.0004561	7	61	12	115
426	0.0004677	0	63	16	126
427	0.000307	7	63	11	119
428	0.0004937	7	72	11	137
429	0.0004544	25	70	14	115
430	0.0004391	30	71	9	112
431	0.0003473	7	54	9	101
432	0.0004543	31	75	16	119
433	0.0004691	7	54	9	101
434	0.0002941	1	49	9	97
435	0.0003199	11	66	9	121
436	0.0003423	1	59	13	117
437	0.0004514	9	69	13	129
438	0.0004984	22	66	14	110
439	0.0004519	12	61	10	110
440	0.0004678	12	73	15	134
441	0.0004593	3	64	17	125
442	0.0004686	8	76	19	144
443	0.0005111	20	66	12	112
444	0.0004592	18	63	17	108
445	0.0003673	19	82	12	145
446	0.0004518	6	64	11	122
447	0.0004763	7	71	18	135
448	0.000462	23	87	19	151
449	0.0004913	16	59	13	102
450	0.0004495	8	67	12	126
451	0.0004515	3	53	13	103
452	0.0004628	12	66	10	120
453	0.0004744	42	92	16	142
454	0.0004518	7	59	10	111
455	0.0004849	53	93	12	133
456	0.0004464	7	54	11	101
457	0.000517	34	83	11	132
458	0.0004465	1	65	12	129
459	0.0004698	21	64	13	107
460	0.0004439	17	66	11	115
461	0.0005434	17	72	18	127
462	0.0003461	5	51	11	97
463	0.0003432	2	63	17	124
464	0.000372	2	47	7	92
465	0.0004905	15	72	10	129
466	0.0004645	28	76	16	124
467	0.0004594	19	72	11	125
468	0.0005159	9	79	19	149
469	0.000452	22	68	8	114
470	0.0004924	19	69	10	119
471	0.0002884	1	52	9	103
472	0.0004803	45	82	12	119
473	0.0003304	8	58	13	108
474	0.0004586	13	44	6	75
475	0.0004629	22	66	14	110
476	0.000325	1	49	11	97
477	0.0005041	24	78	13	132
478	0.0003336	2	58	9	114
479	0.0003023	10	46	11	82
480	0.0004775	79	105	10	131
481	0.0004566	8	67	16	126
482	0.0005217	18	66	13	114
483	0.0004405	22	63	18	104
484	0.0004838	46	89	16	132
485	0.0004552	20	71	11	122
486	0.0003765	28	70	13	112
487	0.0003491	1	65	15	129
488	0.0004656	40	81	15	122
489	0.0004922	13	63	11	113
490	0.0004527	20	77	14	134
491	0.0004949	3	58	12	113
492	0.0004757	33	94	15	155
493	0.000535	10	66	16	122
494	0.0004871	62	89	11	116
495	0.0004501	9	53	12	97
496	0.0003803	3	64	9	125
497	0.0004511	3	63	19	123
498	0.000541	42	91	18	140
499	0.00036	3	58	14	113
500	0.0004926	17	60	10	103
501	0.0004539	10	80	19	150
502	0.0005307	12	73	11	134
503	0.0004541	7	54	8	101
504	0.0003685	4	68	18	132
505	0.0004516	5	61	13	117
506	0.0003426	14	51	9	88
507	0.000436	5	62	18	119
508	0.000372	0	67	18	134
509	0.0004554	69	93	11	117
510	0.0003599	4	60	18	116
511	0.0004586	12	86	19	160
512	0.0003528	2	52	11	102
513	0.0004689	10	60	12	110
514	0.0003403	1	47	10	93
515	0.0004687	7	61	10	115
516	0.000301	2	51	8	100
517	0.0005226	4	57	11	110
518	0.0004382	6	63	13	120
519	0.0003552	2	64	11	126
520	0.0003187	2	51	10	100
521	0.0004554	13	63	16	113
522	0.0004942	20	74	15	128
523	0.0003676	9	64	15	119
524	0.0003355	3	54	11	105
525	0.0004498	5	56	16	107
526	0.0004615	16	68	15	120
527	0.0005206	27	75	9	123
528	0.000463	11	55	15	99
529	0.0003582	1	54	8	107
530	0.000473	6	66	19	126
531	0.0004886	4	60	10	116
532	0.0004652	35	77	13	119
533	0.0004581	10	61	19	112
534	0.0004973	8	52	14	96
535	0.0004651	11	64	10	117
536	0.0004746	2	69	19	136
537	0.0004745	12	71	15	130
538	0.0003429	26	63	17	100
539	0.0004685	2	67	11	132
540	0.0003535	11	64	13	117
541	0.0004463	18	59	8	100
542	0.0003518	1	67	18	133
543	0.0004983	22	76	10	130
544	0.0004601	18	72	13	126
545	0.0003445	2	55	10	108
546	0.000343	6	59	17	112
547	0.0004726	26	63	10	100
548	0.0004531	3	64	11	125
549	0.0003275	3	57	10	111
550	0.000353	1	63	14	125
551	0.0004558	20	75	10	130
552	0.0003992	4	61	10	118
553	0.0003591	2	65	10	128
554	0.0003658	9	63	16	117
555	0.0004328	14	62	13	110
556	0.0004705	9	64	17	119
557	0.0005457	8	63	19	118
558	0.000529	15	61	13	107
559	0.0005025	12	63	10	114
560	0.0003294	1	59	11	117
561	0.0004865	24	65	12	106
562	0.0004563	16	50	9	84
563	0.0004811	19	70	10	121
564	0.0003607	9	52	13	95
565	0.000362	13	54	9	95
566	0.0004658	4	63	10	122
567	0.0004775	32	76	11	120
568	0.0004516	33	76	15	119
569	0.0003188	6	54	10	102
570	0.000542	10	72	15	134
571	0.0003773	26	66	12	106
572	0.0004734	0	62	11	124
573	0.0002871	3	48	9	93
574	0.0003462	11	61	10	111
575	0.000461	5	56	13	107
576	0.0004785	49	77	16	105
577	0.0002859	17	55	8	93
578	0.000293	3	49	9	95
579	0.0003464	11	51	10	91
580	0.0004444	8	71	13	134
581	0.0004455	22	71	11	120
582	0.0004905	28	80	13	132
583	0.0003536	17	57	9	97
584	0.0004611	20	71	12	122
585	0.0005222	18	67	19	116
586	0.0004381	13	70	18	127
587	0.0004968	30	76	17	122
588	0.000349	1	64	16	127
589	0.0004856	22	73	10	124
590	0.0004773	15	77	17	139
591	0.0004841	4	64	11	124
592	0.0004684	59	94	11	129
593	0.0003178	6	49	9	92
594	0.0004604	39	71	10	103
595	0.0003552	13	67	15	121
596	0.0004495	41	78	12	115
597	0.0005224	2	76	19	150
598	0.0004547	6	49	11	92
599	0.0004562	30	72	13	114
600	0.0003475	0	48	11	96
601	0.0004392	14	60	11	106
602	0.0003792	19	61	9	103
603	0.0003466	20	64	10	108
604	0.0005221	53	83	15	113
605	0.0004793	55	91	13	127
606	0.0004752	15	65	9	115
607	0.0004697	25	79	16	133
608	0.0003335	7	54	11	101
609	0.0004686	8	62	10	116
610	0.0004657	13	55	10	97
611	0.0004423	26	63	9	100
612	0.0004624	3	62	11	121
613	0.0003415	5	60	11	115
614	0.0004633	3	62	13	121
615	0.0003401	7	57	10	107
616	0.0004755	13	74	16	135
617	0.0002992	8	56	11	104
618	0.0003086	6	49	9	92
619	0.0005148	7	57	9	107
620	0.0004823	8	53	10	98
621	0.0004415	12	55	10	98
622	0.0005155	10	55	11	100
623	0.0004549	10	70	13	130
624	0.0004379	29	68	11	107
625	0.0004645	12	69	9	126
626	0.0003537	14	69	15	124
627	0.0004479	25	76	16	127
628	0.000489	18	68	15	118
629	0.0004625	17	50	10	83
630	0.0004797	51	72	12	93
631	0.0004485	0	65	18	130
632	0.0004407	5	47	17	89
633	0.0004806	45	77	12	109
634	0.0004619	24	76	12	128
635	0.0004334	16	59	15	102
636	0.0004993	10	54	9	98
637	0.0004457	10	77	19	144
638	0.0004448	5	59	9	113
639	0.0002998	3	57	12	111
640	0.0004989	33	89	17	145
641	0.0003013	9	51	11	93
642	0.000464	14	55	12	96
643	0.0004635	17	64	8	111
644	0.0004462	13	51	8	89
645	0.0004656	7	53	9	99
646	0.0004477	16	70	16	124
647	0.0003178	7	53	9	99
648	0.0003448	8	53	11	98
649	0.0003832	3	57	10	111
650	0.0004491	11	67	19	123
651	0.0003416	8	66	17	124
652	0.0003563	6	61	10	116
653	0.0004467	4	61	17	118
654	0.0004757	11	66	10	121
655	0.0004487	35	70	12	105
656	0.0004405	13	63	16	113
657	0.0004361	11	62	13	113
658	0.0004635	13	66	15	119
659	0.0004596	11	69	11	127
660	0.0004785	12	72	18	132
661	0.0004889	41	89	16	137
662	0.0003123	2	52	9	102
663	0.0004771	18	72	9	126
664	0.0003357	0	52	18	104
665	0.000477	16	63	12	110
666	0.0004545	14	76	18	138
667	0.0005635	31	76	10	121
668	0.0004506	9	66	15	123
669	0.0004464	25	76	13	127
670	0.0003714	2	50	17	98
671	0.0004605	30	67	13	104
672	0.0003692	13	53	8	93
673	0.0005228	66	112	17	158
674	0.0004431	5	61	19	117
675	0.0004849	11	77	15	143
676	0.0005339	24	65	10	106
677	0.0004869	12	60	11	108
678	0.0003214	0	54	8	108
679	0.0003508	0	49	9	98
680	0.0004851	39	87	13	135
681	0.0004863	26	81	16	136
682	0.0003344	4	56	13	108
683	0.0004799	10	69	10	128
684	0.0007035	23	87	18	151
685	0.0004944	24	95	19	166
686	0.0004544	13	79	19	145
687	0.0004828	64	95	16	126
688	0.0003842	17	67	13	117
689	0.0004727	6	66	12	126
690	0.0003412	5	58	16	111
691	0.000467	17	80	14	143
692	0.0003633	5	63	13	121
693	0.0004764	28	80	15	132
694	0.000485	20	76	11	132
695	0.0003533	3	58	8	113
696	0.0004489	21	76	15	131
697	0.000484	24	79	10	134
698	0.0004959	40	80	12	120
699	0.0004409	5	55	13	105
700	0.0004358	25	68	16	111
701	0.0004975	51	79	12	107
702	0.0004728	21	70	11	119
703	0.0005302	10	65	17	120
704	0.0004658	15	64	11	113
705	0.000461	29	75	10	121
706	0.0003202	14	58	10	102
707	0.0003346	2	50	15	98
708	0.0004646	15	62	11	109
709	0.0003129	3	59	10	115
710	0.0004416	35	62	16	89
711	0.0004796	23	69	13	115
712	0.0004325	7	70	18	133
713	0.0004653	29	77	19	125
714	0.0004517	21	65	10	109
715	0.0003511	5	59	10	113
716	0.0004439	20	72	16	124
717	0.0004479	16	66	13	116
718	0.0004669	21	80	16	139
719	0.0004967	36	84	11	132
720	0.0005032	8	68	17	128
721	0.000494	30	69	11	108
722	0.0003023	1	49	8	97
723	0.0004548	10	72	18	134
724	0.0003075	0	49	13	98
725	0.0004474	6	63	13	120
726	0.0003472	0	51	12	102
727	0.0004728	31	80	13	129
728	0.0003381	3	51	11	99
729	0.0003343	14	63	10	112
730	0.0004704	3	63	10	123
731	0.0005034	13	56	14	99
732	0.0004519	28	84	13	140
733	0.000462	21	63	9	105
734	0.0003518	9	52	9	95
735	0.0004694	24	64	10	104
736	0.000353	8	58	10	108
737	0.000356	24	66	10	108
738	0.0005032	75	115	14	155
739	0.0005216	23	69	9	115
740	0.0004698	4	66	15	128
741	0.0003096	6	57	9	108
742	0.0004677	5	60	11	115
743	0.0004547	19	69	10	119
744	0.000462	1	63	10	125
745	0.0004613	16	73	13	130
746	0.0004548	36	81	15	126
747	0.0004841	11	71	12	131
748	0.0004686	17	58	9	99
749	0.0003264	4	58	9	112
750	0.0003441	13	57	10	101
751	0.0004861	34	71	13	108
752	0.0004681	13	65	11	117
753	0.00049	16	68	17	120
754	0.000496	26	71	11	116
755	0.00048	30	81	16	132
756	0.0004624	20	69	19	118
757	0.0004803	29	70	16	111
758	0.0004663	33	75	9	117
759	0.0004651	24	74	15	124
760	0.0004823	2	68	16	134
761	0.0003568	29	55	9	81
762	0.0003808	4	61	11	118
763	0.0004605	6	68	9	130
764	0.0003521	2	58	11	114
765	0.0004401	13	65	13	117
766	0.0004492	3	69	13	135
767	0.000335	2	48	13	94
768	0.0003469	5	60	12	115
769	0.0003234	8	60	11	112
770	0.000448	15	77	11	139
771	0.0004699	14	85	18	156
772	0.0004424	35	87	19	139
773	0.0004638	12	59	9	106
774	0.0004487	9	53	9	97
775	0.0004741	45	87	11	129
776	0.0003471	1	42	11	83
777	0.0004693	3	57	16	111
778	0.0004655	9	62	18	115
779	0.0004651	17	68	9	119
780	0.0003564	6	56	7	106
781	0.0004631	18	71	13	124
782	0.0004519	24	76	14	128
783	0.0003229	1	54	7	107
784	0.0004609	35	66	11	97
785	0.0004483	14	74	19	134
786	0.0003381	3	55	12	107
787	0.0004937	2	58	10	114
788	0.0004491	14	57	14	100
789	0.0005245	30	81	19	132
790	0.0004497	8	61	11	114
791	0.0004547	4	61	19	118
792	0.0004967	14	73	19	132
793	0.000455	12	69	15	126
794	0.000447	13	54	9	95
795	0.0007257	25	77	19	129
796	0.0004649	13	63	17	113
797	0.0004648	3	67	13	131
798	0.0004619	7	67	13	127
799	0.0004813	31	67	14	103
800	0.0003493	1	58	14	115
801	0.0003615	3	48	17	93
802	0.0003568	9	57	12	105
803	0.0004812	17	69	9	121
804	0.0005215	24	79	12	134
805	0.0004831	14	72	12	130
806	0.0004807	7	56	12	105
807	0.0004453	30	64	12	98
808	0.0004986	22	69	15	116
809	0.0005203	10	73	12	136
810	0.0003534	1	60	11	119
811	0.0004689	4	65	13	126
812	0.000523	7	63	14	119
813	0.0003332	9	56	10	103
814	0.0004388	12	62	10	112
815	0.0003232	13	51	10	89
816	0.0005095	2	65	12	128
817	0.0004612	39	89	14	139
818	0.0003381	3	55	13	107
819	0.0004633	1	59	11	117
820	0.0003439	6	64	12	122
821	0.0003737	5	65	10	125
822	0.0004468	14	87	18	160
823	0.0004829	35	95	19	155
824	0.00046	17	63	10	109
825	0.000491	5	64	13	123
826	0.0003142	0	60	10	120
827	0.0003337	3	63	12	123
828	0.0004752	8	64	11	120
829	0.0004436	12	76	16	140
830	0.0004663	11	70	14	129
831	0.0004979	1	71	11	141
832	0.0004522	6	67	16	128
833	0.0005018	47	92	15	137
834	0.0004641	4	63	10	122
835	0.0004555	6	58	12	110
836	0.0003341	15	59	9	103
837	0.0004459	17	60	17	103
838	0.0004809	19	81	19	143
839	0.0003445	7	59	16	111
840	0.0004671	16	62	10	108
841	0.0004667	1	62	16	123
842	0.0004725	23	69	12	115
843	0.0003065	5	58	9	111
844	0.0003655	9	64	11	119
845	0.000339	10	64	18	118
846	0.0004509	28	68	18	108
847	0.0004986	62	92	18	122
848	0.0003273	9	60	7	111
849	0.0004729	8	75	16	142
850	0.0004661	7	49	11	91
851	0.0004637	9	53	17	97
852	0.0003578	1	45	10	89
853	0.000474	1	64	16	127
854	0.000483	26	65	10	104
855	0.0004429	3	56	16	109
856	0.0004632	21	79	14	137
857	0.0004562	8	60	12	112
858	0.0005124	9	60	8	111
859	0.0005979	17	67	8	117
860	0.0004612	13	67	9	121
861	0.0004831	13	67	13	121
862	0.0003602	7	57	9	107
863	0.0004648	9	55	11	101
864	0.0004885	16	67	12	118
865	0.000581	28	80	10	132
866	0.000494	24	75	14	126
867	0.000455	19	70	19	121
868	0.0003333	12	66	19	120
869	0.0003369	0	53	10	106
870	0.0004654	4	47	11	90
871	0.0005458	25	76	16	127
872	0.0004641	25	73	9	121
873	0.0003295	2	68	14	134
874	0.0005222	17	71	15	125
875	0.0004713	8	64	11	120
876	0.0003486	4	68	11	132
877	0.0004924	3	64	13	125
878	0.000342	13	61	11	109
879	0.0004584	19	69	17	119
880	0.0004852	14	71	15	128
881	0.0003376	4	44	6	84
882	0.0004955	13	67	10	121
883	0.0004688	9	71	9	133
884	0.0003432	1	64	11	127
885	0.0003635	7	56	9	105
886	0.0004927	8	68	14	128
887	0.0004697	12	60	12	108
888	0.0003518	9	65	10	121
889	0.0004714	20	65	9	110
890	0.0004603	7	61	15	115
891	0.0004521	13	63	11	113
892	0.0003475	9	69	18	129
893	0.0003274	5	57	10	109
894	0.0004329	1	57	13	113
895	0.0004785	33	75	11	117
896	0.0004089	18	58	12	98
897	0.0004795	11	63	14	115
898	0.0004928	6	58	16	110
899	0.0004498	15	74	13	133
900	0.0005153	31	76	9	121
901	0.0004824	28	66	10	104
902	0.0004689	28	82	13	136
903	0.0004615	17	73	11	129
904	0.0004476	15	74	16	133
905	0.00053	21	68	15	115
906	0.0004456	25	65	9	105
907	0.0004594	27	73	11	119
908	0.0004833	14	66	13	118
909	0.0004582	14	64	13	114
910	0.0004556	4	62	12	120
911	0.0004474	9	59	9	109
912	0.0003493	14	62	13	110
913	0.0004593	14	71	17	128
914	0.000492	6	62	9	118
915	0.0003397	1	60	10	119
916	0.0004746	12	58	10	104
917	0.0005212	54	91	14	128
918	0.0004791	19	63	13	107
919	0.0005455	38	84	13	130
920	0.0004815	16	69	13	122
921	0.0004433	9	63	19	117
922	0.000347	12	60	10	108
923	0.0004553	11	67	12	123
924	0.0004522	14	74	16	134
925	0.0004599	2	57	13	112
926	0.0003664	17	66	15	115
927	0.0004483	31	80	16	129
928	0.000322	7	54	9	101
929	0.0003676	6	51	9	96
930	0.0004638	4	62	9	120
931	0.0004945	16	69	12	122
932	0.0002949	0	51	10	102
933	0.0003404	12	54	7	96
934	0.0004415	4	63	11	122
935	0.0004579	6	64	15	122
936	0.0004707	6	74	17	142
937	0.0004684	20	67	17	114
938	0.0004602	15	65	13	115
939	0.0004553	24	69	14	114
940	0.0004449	12	58	11	104
941	0.0005101	12	69	13	126
942	0.0004642	12	68	12	124
943	0.0004891	15	62	12	109
944	0.0004956	37	78	11	119
945	0.000476	10	63	10	116
946	0.0004668	42	68	11	94
947	0.000487	11	69	13	127
948	0.0004973	10	66	16	122
949	0.0003431	20	71	10	122
950	0.000487	52	94	13	136
951	0.000464	6	56	10	106
952	0.0003294	5	55	10	105
953	0.0004326	7	65	19	123
954	0.0004826	44	78	11	112
955	0.00033	6	57	8	108
956	0.0004702	5	60	10	115
957	0.0003075	4	42	12	80
958	0.0004389	3	50	11	97
959	0.0004478	34	62	12	90
960	0.0004767	2	59	15	116
961	0.0005475	7	69	16	131
962	0.000444	9	69	16	129
963	0.0003195	10	57	10	104
964	0.0004755	53	87	13	121
965	0.0004536	52	94	11	136
966	0.0004566	15	68	14	121
967	0.0004616	22	70	11	118
968	0.0003012	5	56	9	107
969	0.0003524	21	59	9	97
970	0.000318	10	51	7	92
971	0.0004648	26	64	11	102
972	0.0004582	21	66	9	111
973	0.0003469	21	66	10	111
974	0.0004702	22	70	12	118
975	0.0004735	18	72	13	126
976	0.0004558	42	88	16	134
977	0.0003629	1	57	11	113
978	0.0005281	26	69	8	112
979	0.0004838	32	76	13	120
980	0.0004561	25	75	11	125
981	0.0004562	33	77	16	121
982	0.0003632	18	62	10	106
983	0.0004602	49	84	12	119
984	0.0003513	6	53	10	100
985	0.0003287	1	50	10	99
986	0.0004584	17	82	19	147
987	0.0003578	1	61	8	121
988	0.0004485	20	72	13	124
989	0.0003229	5	67	10	129
990	0.0003534	5	60	11	115
991	0.000461	5	60	11	115
992	0.0004692	15	68	14	121
993	0.0004476	23	70	12	117
994	0.0004714	8	56	9	104
995	0.0004768	1	50	10	99
996	0.0004625	6	61	12	116
997	0.0004704	13	69	12	125
998	0.0005303	34	84	13	134
999	0.0005212	7	58	17	109
mean	0.000441698	15.401	65.981	12.64	116.561

## Sheet: PowerBalance_Bal
	time	SEq	Bal	Reg	Egal
0	0.0004566	34	74	8	114
1	0.0004459	6	55	11	104
2	0.0004564	32	71	12	110
3	0.0004511	26	80	13	134
4	0.0007879	12	58	11	104
5	0.000458	7	60	10	113
6	0.0003798	9	56	11	103
7	0.0004641	15	70	8	125
8	0.0005226	34	74	16	114
9	0.0003179	4	61	11	118
10	0.000553	14	56	8	98
11	0.0004613	18	64	11	110
12	0.0005317	19	68	10	117
13	0.000538	13	69	14	125
14	0.0004506	43	71	10	99
15	0.0004581	21	66	10	111
16	0.0002938	3	53	12	103
17	0.0003294	2	61	9	120
18	0.0004592	19	55	10	91
19	0.0004482	50	74	11	98
20	0.0003474	5	53	16	101
21	0.0004565	12	55	11	98
22	0.0003521	7	53	17	99
23	0.0004589	5	65	10	125
24	0.0004667	7	61	12	115
25	0.0004891	28	68	10	108
26	0.0005002	6	63	11	120
27	0.0004435	8	45	8	82
28	0.000476	13	59	9	105
29	0.0004803	4	62	9	120
30	0.0004571	28	71	18	114
31	0.0004692	11	65	11	119
32	0.0004546	9	56	8	103
33	0.000459	9	66	18	123
34	0.0003524	1	54	9	107
35	0.0004714	29	77	10	125
36	0.0004643	26	77	14	128
37	0.0003624	10	65	15	120
38	0.0004537	14	69	12	124
39	0.0003259	12	68	14	124
40	0.0004731	13	56	9	99
41	0.0004088	11	64	13	117
42	0.0003238	1	47	15	93
43	0.0005787	10	62	12	114
44	0.0003653	7	60	9	113
45	0.0003351	5	42	8	79
46	0.0004806	17	70	12	123
47	0.0004567	17	69	16	121
48	0.0005027	16	72	17	128
49	0.0004877	16	67	12	118
50	0.0004999	33	68	11	103
51	0.000457	29	75	13	121
52	0.0004685	74	99	11	124
53	0.0004971	10	74	17	138
54	0.0005379	19	48	11	77
55	0.0002895	12	52	7	92
56	0.0004637	40	79	16	118
57	0.0005193	25	80	16	135
58	0.000483	15	48	8	81
59	0.0003322	12	61	10	110
60	0.0003097	0	51	7	102
61	0.0003517	3	50	10	97
62	0.0003469	16	63	11	110
63	0.0003395	11	59	12	107
64	0.0004613	6	67	12	128
65	0.0003502	2	60	15	118
66	0.0003212	8	53	13	98
67	0.0003351	4	62	19	120
68	0.0003435	2	55	13	108
69	0.0004774	30	74	19	118
70	0.0004609	6	74	19	142
71	0.000499	24	75	19	126
72	0.0004412	4	67	15	130
73	0.0004451	28	58	10	88
74	0.0003368	5	68	16	131
75	0.0004628	11	63	19	115
76	0.0004781	25	80	14	135
77	0.0004558	10	59	11	108
78	0.0004878	26	77	13	128
79	0.000454	12	68	13	124
80	0.0004552	17	60	11	103
81	0.0003087	7	47	10	87
82	0.0004949	59	78	11	97
83	0.0003071	1	43	13	85
84	0.0004492	7	58	12	109
85	0.0004588	3	62	13	121
86	0.0004765	16	68	13	120
87	0.0004462	17	54	7	91
88	0.0003281	4	45	10	86
89	0.000439	3	57	10	111
90	0.0004605	35	73	16	111
91	0.0003884	14	66	16	118
92	0.0003213	10	55	8	100
93	0.0003203	3	55	10	107
94	0.0004543	37	64	14	91
95	0.0003303	6	51	11	96
96	0.0004315	4	59	9	114
97	0.0004621	14	54	9	94
98	0.0004708	28	76	13	124
99	0.0004031	9	52	10	95
100	0.000467	33	73	9	113
101	0.0004649	4	59	11	114
102	0.000408	3	57	11	111
103	0.0003389	1	49	8	97
104	0.0005285	21	73	19	125
105	0.0004737	3	70	8	137
106	0.0004497	18	65	18	112
107	0.0004469	14	70	10	126
108	0.0004366	13	67	19	121
109	0.0004418	7	62	12	117
110	0.0004987	13	58	11	103
111	0.0004863	17	66	16	115
112	0.000431	27	57	11	87
113	0.000461	8	53	11	98
114	0.0004782	15	82	18	149
115	0.0004851	33	65	8	97
116	0.0004621	15	70	10	125
117	0.0003378	13	58	9	103
118	0.0004586	30	69	12	108
119	0.0004565	18	57	8	96
120	0.0004803	10	64	12	118
121	0.0003175	8	57	11	106
122	0.0004636	15	61	8	107
123	0.0005061	36	75	13	114
124	0.000445	13	61	9	109
125	0.0004502	19	73	12	127
126	0.0003449	8	60	13	112
127	0.0003456	21	59	7	97
128	0.000493	25	81	17	137
129	0.0004367	10	61	11	112
130	0.0004545	24	79	18	134
131	0.0003406	4	72	11	140
132	0.0003306	5	57	12	109
133	0.0005083	77	110	17	143
134	0.0005332	8	58	11	108
135	0.0004936	12	60	9	108
136	0.0004658	46	91	14	136
137	0.0004822	8	54	12	100
138	0.0005152	24	76	18	128
139	0.0005882	28	73	10	118
140	0.0004608	20	61	9	102
141	0.0004663	30	69	11	108
142	0.0003643	9	59	11	109
143	0.0004747	21	75	14	129
144	0.0004547	9	69	10	129
145	0.0004736	10	59	12	108
146	0.0004471	36	68	11	100
147	0.0003095	3	54	10	105
148	0.0003295	5	61	11	117
149	0.0004548	3	60	12	117
150	0.0006122	4	67	18	130
151	0.0003352	2	57	17	112
152	0.0004625	10	69	12	128
153	0.0005308	11	63	13	115
154	0.0003616	16	68	11	120
155	0.0004537	4	66	13	128
156	0.0004934	17	61	12	105
157	0.0004411	26	65	10	104
158	0.0004525	4	53	14	102
159	0.0006792	10	55	9	100
160	0.0003023	5	52	8	99
161	0.0004424	4	58	17	112
162	0.0003129	2	43	10	84
163	0.0004775	24	73	17	122
164	0.0005128	7	65	14	123
165	0.0004815	41	94	15	147
166	0.0004602	5	55	9	105
167	0.0004458	19	64	11	109
168	0.0004972	3	64	11	125
169	0.000358	10	70	16	130
170	0.0004463	11	59	14	107
171	0.000488	15	66	10	117
172	0.0004678	14	68	10	122
173	0.0004576	28	69	10	110
174	0.0004463	15	71	11	127
175	0.0004654	22	67	13	112
176	0.0004595	8	58	11	108
177	0.0003288	4	45	12	86
178	0.0004464	2	63	12	124
179	0.0004577	47	78	10	109
180	0.0004659	19	78	10	137
181	0.0004726	27	71	12	115
182	0.0004568	13	63	11	113
183	0.0004583	11	64	17	117
184	0.0004325	32	71	12	110
185	0.0003402	3	55	11	107
186	0.0005409	31	76	13	121
187	0.0004661	7	71	11	135
188	0.0003603	23	77	11	131
189	0.0003507	12	56	11	100
190	0.0004786	51	84	11	117
191	0.0004683	7	58	9	109
192	0.0003376	0	65	13	130
193	0.0003394	8	59	11	110
194	0.0004729	12	72	13	132
195	0.0003669	7	63	11	119
196	0.0006023	16	61	11	106
197	0.000442	11	68	18	125
198	0.0003277	6	65	13	124
199	0.0003646	4	42	11	80
200	0.000445	6	70	14	134
201	0.0003651	3	60	11	117
202	0.0004302	31	72	18	113
203	0.0003603	1	55	9	109
204	0.0004685	2	69	18	136
205	0.000459	0	67	19	134
206	0.0004528	15	58	11	101
207	0.0005066	32	73	11	114
208	0.000467	22	68	12	114
209	0.0004579	14	68	13	122
210	0.0003465	9	67	16	125
211	0.0005841	17	81	16	145
212	0.000353	19	77	18	135
213	0.0003805	17	78	13	139
214	0.0004774	42	88	17	134
215	0.0004736	16	67	15	118
216	0.0004551	38	86	11	134
217	0.0004782	13	59	9	105
218	0.0004735	8	65	9	122
219	0.0004538	49	80	18	111
220	0.0004692	16	68	14	120
221	0.0004452	20	77	15	134
222	0.0004843	4	49	9	94
223	0.0003394	2	53	11	104
224	0.0003343	1	56	11	111
225	0.0004569	13	88	19	163
226	0.0005028	5	58	7	111
227	0.0004766	13	56	10	99
228	0.0004424	11	76	19	141
229	0.0003188	3	57	10	111
230	0.0004406	24	64	10	104
231	0.0004836	4	69	12	134
232	0.0003385	24	67	11	110
233	0.0004646	10	59	10	108
234	0.0004539	3	58	8	113
235	0.0004675	14	67	15	120
236	0.0004711	15	68	11	121
237	0.0004668	22	74	17	126
238	0.0004831	4	61	12	118
239	0.000505	14	59	10	104
240	0.0004584	21	88	17	155
241	0.0003475	8	63	9	118
242	0.0004658	17	74	16	131
243	0.0004445	16	68	13	120
244	0.0004442	10	60	9	110
245	0.0004592	1	59	12	117
246	0.0004535	8	61	12	114
247	0.0003556	5	66	12	127
248	0.0004793	15	69	11	123
249	0.0004645	7	63	17	119
250	0.0003454	8	52	14	96
251	0.0004881	11	67	16	123
252	0.0004433	34	74	15	114
253	0.0004707	8	64	10	120
254	0.0004759	33	76	11	119
255	0.0005134	70	105	19	140
256	0.0003986	1	47	8	93
257	0.0003255	6	64	11	122
258	0.0003627	4	61	8	118
259	0.0004652	5	57	12	109
260	0.0004429	8	59	17	110
261	0.000453	19	64	11	109
262	0.0004713	65	89	12	113
263	0.0004592	10	64	14	118
264	0.0004579	22	68	14	114
265	0.0005096	66	110	19	154
266	0.000491	18	63	14	108
267	0.0002988	8	60	8	112
268	0.0004724	28	74	11	120
269	0.0004672	4	73	17	142
270	0.0004552	20	71	12	122
271	0.0004564	32	76	13	120
272	0.0004671	7	64	12	121
273	0.0005307	17	67	11	117
274	0.0004401	0	60	17	120
275	0.0004894	43	81	13	119
276	0.0004575	11	83	18	155
277	0.0004792	56	88	12	120
278	0.0004614	11	63	14	115
279	0.0003627	0	71	18	142
280	0.0004818	5	71	14	137
281	0.0004527	2	76	10	150
282	0.0004662	12	51	10	90
283	0.0005727	27	76	15	125
284	0.000472	23	63	12	103
285	0.0004683	22	71	12	120
286	0.0004634	9	77	17	145
287	0.0004534	6	65	9	124
288	0.0004779	24	66	8	108
289	0.0003352	21	51	8	81
290	0.0005412	69	116	17	163
291	0.0005061	56	78	13	100
292	0.0004511	12	73	19	134
293	0.0004677	35	69	9	103
294	0.0005055	23	71	14	119
295	0.0004578	20	63	13	106
296	0.0004555	0	57	18	114
297	0.0004697	22	80	16	138
298	0.0004601	1	57	11	113
299	0.000594	2	64	18	126
300	0.0003544	3	67	19	131
301	0.0004518	12	62	9	112
302	0.0004491	24	63	11	102
303	0.0003244	8	53	14	98
304	0.0003454	5	58	17	111
305	0.0005434	8	57	12	106
306	0.0004724	11	51	8	91
307	0.0005139	41	90	16	139
308	0.0004594	7	64	11	121
309	0.000467	29	81	19	133
310	0.0004763	22	73	9	124
311	0.0005521	9	63	14	117
312	0.0004583	28	72	15	116
313	0.0004413	7	67	12	127
314	0.0003459	22	73	10	124
315	0.0004474	8	66	17	124
316	0.0005361	17	63	17	109
317	0.0004671	14	63	12	112
318	0.0003302	11	55	10	99
319	0.0004532	19	75	12	131
320	0.0004735	31	69	17	107
321	0.0004526	18	61	9	104
322	0.000449	42	70	17	98
323	0.0004704	15	64	13	113
324	0.0005051	11	68	16	125
325	0.0004673	23	73	11	123
326	0.0004844	27	65	15	103
327	0.0004825	11	61	15	111
328	0.0004583	37	82	11	127
329	0.000449	28	76	13	124
330	0.0005036	17	73	14	129
331	0.0004499	14	69	14	124
332	0.0004906	47	85	14	123
333	0.0004367	20	67	15	114
334	0.000474	14	53	8	92
335	0.000327	1	62	9	123
336	0.0004456	37	71	10	105
337	0.0004431	9	61	14	113
338	0.0004976	11	63	15	115
339	0.0004515	9	63	19	117
340	0.0004673	5	57	7	109
341	0.0004368	8	55	19	102
342	0.0004674	9	72	11	135
343	0.0002892	8	44	10	80
344	0.0004734	2	50	11	98
345	0.0004527	6	66	13	126
346	0.000479	15	78	12	141
347	0.0004529	14	67	16	120
348	0.0004636	10	69	19	128
349	0.0003055	6	49	10	92
350	0.0004387	15	55	10	95
351	0.000492	3	70	10	137
352	0.0004776	14	63	12	112
353	0.0004533	7	61	11	115
354	0.0002956	10	51	10	92
355	0.0004692	18	65	9	112
356	0.0004494	7	69	13	131
357	0.0004727	1	69	13	137
358	0.0004606	23	87	18	151
359	0.0003466	11	56	10	101
360	0.0004473	32	92	16	152
361	0.0004496	16	61	11	106
362	0.0004887	16	57	8	98
363	0.0003077	2	40	11	78
364	0.0003454	30	80	18	130
365	0.0005141	34	72	8	110
366	0.0004451	24	73	19	122
367	0.0003329	28	70	11	112
368	0.000471	17	73	14	129
369	0.0004839	19	61	11	103
370	0.0003488	4	53	11	102
371	0.0004526	21	79	16	137
372	0.0004463	7	74	17	141
373	0.0004851	70	110	12	150
374	0.0004507	22	80	15	138
375	0.0004652	5	58	7	111
376	0.000332	3	53	19	103
377	0.0003225	8	54	10	100
378	0.0004645	14	72	11	130
379	0.0003417	2	65	11	128
380	0.0004836	10	70	17	130
381	0.0004483	8	52	13	96
382	0.0004807	42	89	18	136
383	0.000359	9	60	11	111
384	0.0004599	17	57	10	97
385	0.0004812	22	91	14	160
386	0.0004412	23	56	10	89
387	0.0003202	5	61	9	117
388	0.0004674	14	65	13	116
389	0.0004574	6	53	10	100
390	0.0004862	49	85	11	121
391	0.0003634	5	46	6	87
392	0.0004417	12	55	10	98
393	0.0004419	39	83	16	127
394	0.0003595	11	69	13	127
395	0.0004282	25	75	19	125
396	0.0004716	38	77	12	116
397	0.0005275	13	66	11	119
398	0.0004719	48	91	10	134
399	0.0004722	54	101	19	148
400	0.0004626	17	68	19	119
401	0.0003382	4	55	16	106
402	0.0004948	5	59	8	113
403	0.0003436	9	57	12	105
404	0.0005023	17	83	15	149
405	0.0003369	6	47	11	88
406	0.0003591	2	64	13	126
407	0.0007134	15	72	15	129
408	0.0004683	12	82	11	152
409	0.0004533	19	65	13	111
410	0.0004796	34	77	16	120
411	0.0003208	5	51	10	97
412	0.0004778	27	74	17	121
413	0.0005044	4	74	15	144
414	0.0005153	36	83	13	130
415	0.0004606	35	84	17	133
416	0.0003337	3	63	16	123
417	0.0005207	5	76	16	147
418	0.0003138	6	61	9	116
419	0.0004645	4	70	15	136
420	0.0004624	13	68	13	123
421	0.0005218	4	62	10	120
422	0.0004689	18	61	12	104
423	0.0004591	8	56	12	104
424	0.0004697	17	66	17	115
425	0.0004457	7	61	12	115
426	0.0004985	0	63	16	126
427	0.0002916	7	63	11	119
428	0.0004422	7	72	11	137
429	0.0004469	25	70	14	115
430	0.0004376	30	71	9	112
431	0.0003881	7	54	9	101
432	0.0004456	31	75	16	119
433	0.0004715	7	54	9	101
434	0.0002816	1	49	9	97
435	0.0003282	11	66	9	121
436	0.0004756	1	59	13	117
437	0.0005762	15	65	8	115
438	0.0004553	22	66	14	110
439	0.0004911	12	61	10	110
440	0.0004455	12	73	15	134
441	0.0004434	3	64	17	125
442	0.000489	8	76	19	144
443	0.0005061	20	66	12	112
444	0.0004683	18	63	17	108
445	0.0003683	19	82	12	145
446	0.0004615	6	64	11	122
447	0.0004866	7	71	18	135
448	0.0004648	23	87	19	151
449	0.000507	16	59	13	102
450	0.0004691	8	67	12	126
451	0.000432	3	53	13	103
452	0.0004466	12	66	10	120
453	0.000496	42	92	16	142
454	0.0004633	7	59	10	111
455	0.0006186	53	93	12	133
456	0.0003409	7	54	11	101
457	0.000467	34	83	11	132
458	0.0004842	1	65	12	129
459	0.000569	21	64	13	107
460	0.0004687	17	66	11	115
461	0.0004605	17	72	18	127
462	0.0003994	5	51	11	97
463	0.0003413	2	63	17	124
464	0.0003228	2	47	7	92
465	0.0004694	15	72	10	129
466	0.0004559	28	76	16	124
467	0.0004677	20	69	11	118
468	0.0004486	9	79	19	149
469	0.0004794	22	68	8	114
470	0.0004726	19	69	10	119
471	0.0003433	1	52	9	103
472	0.0004722	45	82	12	119
473	0.0003504	8	58	13	108
474	0.0004685	13	44	6	75
475	0.0004958	22	66	14	110
476	0.0003432	1	49	11	97
477	0.0004416	24	78	13	132
478	0.0003258	2	58	9	114
479	0.0002905	10	46	11	82
480	0.0005207	79	105	10	131
481	0.0004569	8	67	16	126
482	0.0004594	18	66	13	114
483	0.0004785	22	63	18	104
484	0.0004819	46	89	16	132
485	0.0004459	20	71	11	122
486	0.0003339	28	70	13	112
487	0.0003365	1	65	15	129
488	0.0004701	40	81	15	122
489	0.0005098	13	63	11	113
490	0.0004497	20	77	14	134
491	0.0004951	3	58	12	113
492	0.0005194	33	94	15	155
493	0.0004398	10	66	16	122
494	0.0005239	62	89	11	116
495	0.0004631	9	53	12	97
496	0.0003531	3	64	9	125
497	0.0006043	3	63	19	123
498	0.0005211	42	91	18	140
499	0.0003344	3	58	14	113
500	0.0004548	17	60	10	103
501	0.0004443	10	80	19	150
502	0.0004686	14	68	12	122
503	0.0005005	7	54	8	101
504	0.0003477	4	68	18	132
505	0.0004656	5	61	13	117
506	0.0003268	14	51	9	88
507	0.0004379	5	62	18	119
508	0.0003496	0	67	18	134
509	0.0004825	69	93	11	117
510	0.0003524	4	60	18	116
511	0.0004554	12	86	19	160
512	0.0003488	2	52	11	102
513	0.0004488	10	60	12	110
514	0.0004156	1	47	10	93
515	0.0004992	7	61	10	115
516	0.0003019	2	51	8	100
517	0.0004472	4	57	11	110
518	0.0004412	6	63	13	120
519	0.0003633	2	64	11	126
520	0.0003222	2	51	10	100
521	0.0004654	13	63	16	113
522	0.000443	20	74	15	128
523	0.000354	9	64	15	119
524	0.0003293	3	54	11	105
525	0.0004589	5	56	16	107
526	0.0004494	16	68	15	120
527	0.0004571	27	75	9	123
528	0.0003265	11	55	15	99
529	0.0003252	1	54	8	107
530	0.0004232	6	66	19	126
531	0.0004686	4	60	10	116
532	0.0004817	35	77	13	119
533	0.0004491	10	61	19	112
534	0.0004453	8	52	14	96
535	0.0004547	11	64	10	117
536	0.000463	2	69	19	136
537	0.0005044	12	71	15	130
538	0.0003407	26	63	17	100
539	0.0004433	2	67	11	132
540	0.0003729	11	64	13	117
541	0.000454	18	59	8	100
542	0.0003432	1	67	18	133
543	0.0004548	22	76	10	130
544	0.0004535	18	72	13	126
545	0.0004564	2	55	10	108
546	0.0003334	6	59	17	112
547	0.0004596	26	63	10	100
548	0.000464	3	64	11	125
549	0.0003202	3	57	10	111
550	0.0003911	1	63	14	125
551	0.000464	20	75	10	130
552	0.0003574	4	61	10	118
553	0.0003635	2	65	10	128
554	0.0003447	9	63	16	117
555	0.0004538	14	62	13	110
556	0.0004702	9	64	17	119
557	0.0004624	8	63	19	118
558	0.0004465	15	61	13	107
559	0.0004866	13	62	10	111
560	0.0003281	1	59	11	117
561	0.0004667	24	65	12	106
562	0.0004519	16	50	9	84
563	0.0004879	19	70	10	121
564	0.0003473	9	52	13	95
565	0.0003462	13	54	9	95
566	0.0004484	4	63	10	122
567	0.0005047	32	76	11	120
568	0.0004551	33	76	15	119
569	0.0003545	6	54	10	102
570	0.0005769	10	72	15	134
571	0.0003464	26	66	12	106
572	0.0005092	0	62	11	124
573	0.0002904	3	48	9	93
574	0.0003494	11	61	10	111
575	0.0004628	5	56	13	107
576	0.0004881	49	77	16	105
577	0.000287	17	55	8	93
578	0.0003109	3	49	9	95
579	0.0003406	11	51	10	91
580	0.0004464	8	71	13	134
581	0.0004646	22	71	11	120
582	0.0004416	28	80	13	132
583	0.0004579	17	57	9	97
584	0.0004712	20	71	12	122
585	0.000519	18	67	19	116
586	0.0004435	13	70	18	127
587	0.0005118	30	76	17	122
588	0.0003565	1	64	16	127
589	0.0004329	22	73	10	124
590	0.0004698	20	75	17	130
591	0.0004659	4	64	11	124
592	0.000479	59	94	11	129
593	0.0003105	6	49	9	92
594	0.0004297	39	71	10	103
595	0.0004883	13	67	15	121
596	0.0004624	41	78	12	115
597	0.0005151	2	76	19	150
598	0.0004902	6	49	11	92
599	0.0004627	30	72	13	114
600	0.0003355	0	48	11	96
601	0.0004433	14	60	11	106
602	0.0003528	19	61	9	103
603	0.0003594	20	64	10	108
604	0.0005177	53	83	15	113
605	0.0005234	55	91	13	127
606	0.000452	15	65	9	115
607	0.0004772	25	79	16	133
608	0.0003383	7	54	11	101
609	0.0005221	8	62	10	116
610	0.000465	13	55	10	97
611	0.0004376	26	63	9	100
612	0.0004633	3	62	11	121
613	0.0003649	5	60	11	115
614	0.0004544	3	62	13	121
615	0.0003443	7	57	10	107
616	0.000497	13	74	16	135
617	0.0003018	8	56	11	104
618	0.0002982	6	49	9	92
619	0.0004596	7	57	9	107
620	0.0004777	8	53	10	98
621	0.0004503	12	55	10	98
622	0.0004513	10	55	11	100
623	0.0005319	10	70	13	130
624	0.0004352	29	68	11	107
625	0.0004525	12	69	9	126
626	0.0003806	14	69	15	124
627	0.000439	25	76	16	127
628	0.0004605	18	68	15	118
629	0.000448	17	50	10	83
630	0.0004856	51	72	12	93
631	0.0004502	0	65	18	130
632	0.0004237	5	47	17	89
633	0.0004804	45	77	12	109
634	0.0004497	24	76	12	128
635	0.000437	16	59	15	102
636	0.0003076	10	54	9	98
637	0.0004424	10	77	19	144
638	0.0005271	7	59	9	111
639	0.0003074	3	57	12	111
640	0.0004733	33	89	17	145
641	0.0003025	9	51	11	93
642	0.0005367	14	55	12	96
643	0.0005053	17	64	8	111
644	0.000513	13	51	8	89
645	0.0004822	7	53	9	99
646	0.0004411	16	70	16	124
647	0.0003254	7	53	9	99
648	0.0003357	8	53	11	98
649	0.0003618	3	57	10	111
650	0.0004846	11	67	19	123
651	0.0003398	8	66	17	124
652	0.0003551	6	61	10	116
653	0.0003525	4	61	17	118
654	0.0004581	11	66	10	121
655	0.0004732	35	70	12	105
656	0.0004448	13	63	16	113
657	0.0004424	11	62	13	113
658	0.0004456	13	66	15	119
659	0.0004689	11	69	11	127
660	0.0004672	12	72	18	132
661	0.0005078	41	89	16	137
662	0.0003077	2	52	9	102
663	0.0004832	18	72	9	126
664	0.000353	0	52	18	104
665	0.0004566	16	63	12	110
666	0.0004443	14	76	18	138
667	0.0004834	31	76	10	121
668	0.0004637	9	66	15	123
669	0.0004557	25	76	13	127
670	0.0003508	2	50	17	98
671	0.0004659	30	67	13	104
672	0.0003276	13	53	8	93
673	0.0004969	66	112	17	158
674	0.000483	5	61	19	117
675	0.0004729	11	77	15	143
676	0.0004845	24	65	10	106
677	0.0004474	12	60	11	108
678	0.0003032	0	54	8	108
679	0.0003337	0	49	9	98
680	0.000466	39	87	13	135
681	0.0004473	26	81	16	136
682	0.0003554	4	56	13	108
683	0.0005352	10	69	10	128
684	0.0005774	23	87	18	151
685	0.0005201	24	95	19	166
686	0.0004768	13	79	19	145
687	0.0004915	64	95	16	126
688	0.0003509	17	67	13	117
689	0.0004542	11	65	12	119
690	0.0003363	5	58	16	111
691	0.0004626	17	80	14	143
692	0.0003589	5	63	13	121
693	0.0004788	28	80	15	132
694	0.0005807	37	74	16	111
695	0.0003675	3	58	8	113
696	0.0004374	21	76	15	131
697	0.0005105	24	79	10	134
698	0.0004666	40	80	12	120
699	0.0004685	5	55	13	105
700	0.000447	25	68	16	111
701	0.0004698	51	79	12	107
702	0.0004384	21	70	11	119
703	0.0004597	10	65	17	120
704	0.0004578	15	64	11	113
705	0.0004554	29	75	10	121
706	0.0003318	14	58	10	102
707	0.0003211	2	50	15	98
708	0.0004493	15	62	11	109
709	0.000359	3	59	10	115
710	0.0005618	35	62	16	89
711	0.000449	23	69	13	115
712	0.0003594	7	70	18	133
713	0.0004702	29	77	19	125
714	0.000461	21	65	10	109
715	0.0003612	5	59	10	113
716	0.0004333	20	72	16	124
717	0.0004333	16	66	13	116
718	0.0004762	28	78	10	128
719	0.000461	36	84	11	132
720	0.0004703	8	68	17	128
721	0.000503	30	69	11	108
722	0.0003025	1	49	8	97
723	0.0004578	10	72	18	134
724	0.0003038	0	49	13	98
725	0.0004456	6	63	13	120
726	0.0003458	0	51	12	102
727	0.0006659	31	80	13	129
728	0.0003089	3	51	11	99
729	0.0003389	14	63	10	112
730	0.000521	3	63	10	123
731	0.0004487	13	56	14	99
732	0.0006751	28	84	13	140
733	0.0003483	21	63	9	105
734	0.0004406	9	52	9	95
735	0.0004951	24	64	10	104
736	0.0003245	8	58	10	108
737	0.0003531	24	66	10	108
738	0.0004942	75	115	14	155
739	0.0005006	23	69	9	115
740	0.0004667	4	66	15	128
741	0.0004475	6	57	9	108
742	0.0004494	5	60	11	115
743	0.0004663	19	69	10	119
744	0.0004765	1	63	10	125
745	0.0004445	16	73	13	130
746	0.0004394	36	81	15	126
747	0.0004586	18	68	12	118
748	0.0003414	17	58	9	99
749	0.000323	4	58	9	112
750	0.0004513	13	57	10	101
751	0.0004922	34	71	13	108
752	0.0004615	13	65	11	117
753	0.0004679	16	68	17	120
754	0.0004624	26	71	11	116
755	0.0004669	30	81	16	132
756	0.0004533	20	69	19	118
757	0.0004781	29	70	16	111
758	0.0004797	33	75	9	117
759	0.0004976	24	74	15	124
760	0.0005036	2	68	16	134
761	0.0003808	29	55	9	81
762	0.0003372	4	61	11	118
763	0.0004647	6	68	9	130
764	0.0003691	2	58	11	114
765	0.0004465	13	65	13	117
766	0.0004482	9	69	10	129
767	0.0003309	2	48	13	94
768	0.0003293	5	60	12	115
769	0.0003538	8	60	11	112
770	0.0004443	15	77	11	139
771	0.0004473	15	84	15	153
772	0.0004679	35	87	19	139
773	0.0004975	12	59	9	106
774	0.0004455	9	53	9	97
775	0.0004736	45	87	11	129
776	0.0003505	1	42	11	83
777	0.0004425	3	57	16	111
778	0.0004391	19	59	11	99
779	0.000459	17	68	9	119
780	0.0003393	6	56	7	106
781	0.0004528	18	71	13	124
782	0.0005272	24	76	14	128
783	0.0003546	1	54	7	107
784	0.0004593	35	66	11	97
785	0.000446	14	74	19	134
786	0.0003779	3	55	12	107
787	0.000467	6	58	9	110
788	0.0004881	14	57	14	100
789	0.0004632	30	81	19	132
790	0.0004591	8	60	11	112
791	0.0004605	4	61	19	118
792	0.0004456	17	70	16	123
793	0.0004639	12	69	15	126
794	0.0004458	13	54	9	95
795	0.0004541	25	77	19	129
796	0.0004511	13	63	17	113
797	0.0004608	3	67	13	131
798	0.0004715	13	65	15	117
799	0.0004457	31	67	14	103
800	0.000325	1	58	14	115
801	0.0003436	3	48	17	93
802	0.0003892	9	57	12	105
803	0.00046	17	69	9	121
804	0.0005109	24	79	12	134
805	0.0004734	14	72	12	130
806	0.0004471	7	56	12	105
807	0.000522	30	64	12	98
808	0.0004602	22	69	15	116
809	0.000444	10	73	12	136
810	0.0003388	1	60	11	119
811	0.0004686	4	65	13	126
812	0.0004529	10	61	16	112
813	0.0003237	9	56	10	103
814	0.0004397	12	62	10	112
815	0.0003197	13	51	10	89
816	0.0004663	2	65	12	128
817	0.0004749	39	89	14	139
818	0.0003661	3	55	13	107
819	0.0004445	1	59	11	117
820	0.0003318	6	64	12	122
821	0.0004584	5	65	10	125
822	0.0004398	14	87	18	160
823	0.0004899	35	95	19	155
824	0.0005167	17	63	10	109
825	0.0004562	5	64	13	123
826	0.0003185	0	60	10	120
827	0.0003264	3	63	12	123
828	0.000446	8	64	11	120
829	0.0005403	12	76	16	140
830	0.0004622	11	70	14	129
831	0.0005207	1	71	11	141
832	0.0004654	6	67	16	128
833	0.0004859	47	92	15	137
834	0.0004631	4	63	10	122
835	0.00046	6	58	12	110
836	0.0003361	15	59	9	103
837	0.0004434	17	60	17	103
838	0.0004812	19	81	19	143
839	0.0003374	7	59	16	111
840	0.0005147	16	62	10	108
841	0.0005182	1	62	16	123
842	0.0004246	23	69	12	115
843	0.0003041	5	58	9	111
844	0.0003659	9	64	11	119
845	0.0003364	10	64	18	118
846	0.0004535	28	68	18	108
847	0.0004482	62	92	18	122
848	0.0003323	9	60	7	111
849	0.0004559	8	75	16	142
850	0.0003641	7	49	11	91
851	0.0004539	9	53	17	97
852	0.000283	1	45	10	89
853	0.0004511	1	64	16	127
854	0.0003443	26	65	10	104
855	0.0004967	3	56	16	109
856	0.0004568	21	79	14	137
857	0.0004616	8	60	12	112
858	0.0004773	9	60	8	111
859	0.000473	17	67	8	117
860	0.0004656	13	67	9	121
861	0.0005162	13	67	13	121
862	0.0003456	7	57	9	107
863	0.0004487	16	55	8	94
864	0.0004428	16	67	12	118
865	0.000522	28	80	10	132
866	0.0004856	24	75	14	126
867	0.0004559	19	70	19	121
868	0.0003376	12	66	19	120
869	0.000326	0	53	10	106
870	0.0004814	9	47	7	85
871	0.0004665	25	76	16	127
872	0.0004949	25	73	9	121
873	0.0003482	2	68	14	134
874	0.0004573	17	71	15	125
875	0.0004614	10	62	8	114
876	0.0003376	4	68	11	132
877	0.0004807	3	64	13	125
878	0.0003856	13	61	11	109
879	0.0004553	19	69	17	119
880	0.0005572	14	71	15	128
881	0.0003601	4	44	6	84
882	0.0004818	13	67	10	121
883	0.0004725	9	71	9	133
884	0.0003539	1	64	11	127
885	0.0003571	7	56	9	105
886	0.0004697	8	68	14	128
887	0.0004889	12	60	12	108
888	0.0003256	9	65	10	121
889	0.0004695	20	65	9	110
890	0.0004602	7	61	15	115
891	0.000458	13	63	11	113
892	0.0003474	9	69	18	129
893	0.0003366	5	57	10	109
894	0.000436	1	57	13	113
895	0.000462	33	75	11	117
896	0.0004906	18	58	12	98
897	0.0004558	11	63	14	115
898	0.0004323	6	58	16	110
899	0.0004753	15	74	13	133
900	0.000467	31	76	9	121
901	0.0004784	28	66	10	104
902	0.0004585	28	82	13	136
903	0.0004659	17	73	11	129
904	0.0004802	15	74	16	133
905	0.0004573	21	68	15	115
906	0.0004557	25	65	9	105
907	0.0004598	27	73	11	119
908	0.0004478	14	66	13	118
909	0.0004708	14	64	13	114
910	0.0004813	4	62	12	120
911	0.0004574	9	59	9	109
912	0.0003369	14	62	13	110
913	0.0004623	14	71	17	128
914	0.000466	6	62	9	118
915	0.0003393	1	60	10	119
916	0.0004542	12	58	10	104
917	0.0004867	54	91	14	128
918	0.0004758	25	63	11	101
919	0.0004973	38	84	13	130
920	0.0005458	16	69	13	122
921	0.0004378	9	63	19	117
922	0.0003473	12	60	10	108
923	0.0004782	11	67	12	123
924	0.000443	14	74	16	134
925	0.0004438	2	57	13	112
926	0.0003539	17	66	15	115
927	0.0004692	36	72	11	108
928	0.0004484	7	54	9	101
929	0.0003277	6	51	9	96
930	0.0004583	4	62	9	120
931	0.0004976	16	69	12	122
932	0.0004766	0	51	10	102
933	0.0003547	12	54	7	96
934	0.0004486	4	63	11	122
935	0.0004393	6	64	15	122
936	0.0004956	6	74	17	142
937	0.0004761	20	67	17	114
938	0.0004602	15	65	13	115
939	0.0004998	24	69	14	114
940	0.0004608	12	58	11	104
941	0.0004442	12	69	13	126
942	0.0004989	12	68	12	124
943	0.0003571	15	62	12	109
944	0.0004827	37	78	11	119
945	0.0004583	10	63	10	116
946	0.0004697	42	68	11	94
947	0.0004926	11	69	13	127
948	0.0004448	10	66	16	122
949	0.0004363	20	71	10	122
950	0.0004748	52	94	13	136
951	0.0004579	6	56	10	106
952	0.0003521	5	55	10	105
953	0.0004612	7	65	19	123
954	0.0004574	44	78	11	112
955	0.0003427	6	57	8	108
956	0.0004696	5	60	10	115
957	0.0003177	4	42	12	80
958	0.0004438	3	50	11	97
959	0.0004311	34	62	12	90
960	0.0004462	6	59	15	112
961	0.0004669	7	69	16	131
962	0.0004401	9	69	16	129
963	0.0003093	10	57	10	104
964	0.0004958	53	87	13	121
965	0.0005411	52	94	11	136
966	0.0004885	15	68	14	121
967	0.0004487	22	70	11	118
968	0.0003101	5	56	9	107
969	0.0003378	21	59	9	97
970	0.0003386	10	51	7	92
971	0.0005181	26	64	11	102
972	0.0004529	21	66	9	111
973	0.0003477	21	66	10	111
974	0.0004964	24	68	10	112
975	0.0004843	18	72	13	126
976	0.000447	42	88	16	134
977	0.0003236	1	57	11	113
978	0.0005006	26	69	8	112
979	0.0004684	32	76	13	120
980	0.0004547	25	75	11	125
981	0.0004674	33	77	16	121
982	0.0003417	18	62	10	106
983	0.0004673	49	84	12	119
984	0.0004596	6	53	10	100
985	0.0003167	1	50	10	99
986	0.0004553	17	82	19	147
987	0.0003175	1	61	8	121
988	0.0004543	20	72	13	124
989	0.0003307	5	67	10	129
990	0.0003637	5	60	11	115
991	0.0004558	5	60	11	115
992	0.0005016	15	68	14	121
993	0.0004939	23	70	12	117
994	0.0004918	8	56	9	104
995	0.0003317	1	50	10	99
996	0.0003599	6	61	12	116
997	0.0004896	13	69	12	125
998	0.0004658	38	78	13	118
999	0.0004536	7	58	17	109
mean	0.000438076	15.608	65.891	12.564	116.174
