# Supplementary material
Source: ML conference proceedings conference paper supplement (https://openreview.net/forum?id=2rAiDBJgR_)
Supplement: supplementary_material [file L_size-30_test.xlsx]

## Sheet: GS_MaleOpt
	time	SEq	Bal	Reg	Egal
0	0.0001896	119	182	20	245
1	0.0001787	121	196	24	271
2	0.0001905	87	160	28	233
3	0.0002506	21	123	16	225
4	0.0001964	6	124	20	242
5	0.0002051	23	112	13	201
6	0.0001982	46	130	15	214
7	0.0001845	54	137	17	220
8	0.0002009	35	138	27	241
9	0.0001956	17	131	16	245
10	0.000187	2	108	19	214
11	0.0001881	1	114	21	227
12	0.0001811	32	109	17	186
13	0.0002025	47	153	19	259
14	0.0001942	79	159	19	239
15	0.0001888	68	154	17	240
16	0.0002131	10	117	20	224
17	0.0001908	45	156	18	267
18	0.000187	26	129	19	232
19	0.0001856	75	150	17	225
20	0.0001904	57	151	17	245
21	0.000182	80	170	24	260
22	0.0002184	61	145	23	229
23	0.0001955	5	104	18	203
24	0.0002075	33	127	17	221
25	0.000182	54	136	16	218
26	0.0001985	57	140	14	223
27	0.0001907	42	133	14	224
28	0.000189	142	205	29	268
29	0.0001798	70	158	18	246
30	0.0002359	35	131	18	227
31	0.0001987	42	142	20	242
32	0.0001809	57	134	17	211
33	0.0001866	38	154	17	270
34	0.0001967	22	150	28	278
35	0.0001881	1	119	17	237
36	0.0001774	59	131	22	203
37	0.0001849	34	139	15	244
38	0.0001791	59	147	18	235
39	0.0001907	54	154	13	254
40	0.000207	24	150	27	276
41	0.000216	155	203	24	251
42	0.0002113	58	152	28	246
43	0.0001803	28	121	16	214
44	0.000185	58	140	16	222
45	0.0002059	62	163	21	264
46	0.0002028	37	157	17	277
47	0.0001677	124	178	18	232
48	0.0001899	41	152	13	263
49	0.0001965	24	137	17	250
50	0.0001862	39	145	18	251
51	0.0001889	87	196	28	305
52	0.0001758	129	182	20	235
53	0.000197	76	164	18	252
54	0.0001964	144	198	19	252
55	0.0001952	12	129	26	246
56	0.0001715	138	189	24	240
57	0.0001986	30	113	23	196
58	0.0002314	135	191	24	247
59	0.0002053	152	199	18	246
60	0.0001722	173	223	20	273
61	0.0001929	51	137	26	223
62	0.0002104	93	175	18	257
63	0.0001969	48	140	23	232
64	0.0001847	24	149	26	274
65	0.0001937	14	132	18	250
66	0.0001907	48	118	17	188
67	0.0001729	145	201	29	257
68	0.0002236	25	133	17	241
69	0.0001805	102	179	23	256
70	0.0001801	39	129	28	219
71	0.0001719	69	133	17	197
72	0.0001916	7	121	18	235
73	0.0002135	6	117	11	228
74	0.0001752	125	196	22	267
75	0.0001891	45	132	13	219
76	0.0001981	23	141	16	259
77	0.0001718	67	138	17	209
78	0.0001879	11	137	23	263
79	0.0001805	48	137	23	226
80	0.000197	11	118	16	225
81	0.0002046	136	192	19	248
82	0.0002383	12	163	27	314
83	0.0002338	15	117	14	219
84	0.0002179	78	164	28	250
85	0.0001775	9	102	14	195
86	0.0001676	124	179	21	234
87	0.0001902	30	126	15	222
88	0.000189	38	136	17	234
89	0.0001813	80	166	28	252
90	0.0002074	67	160	19	253
91	0.0002008	41	153	28	265
92	0.0001933	94	178	23	262
93	0.0001859	1	120	18	239
94	0.0001781	61	139	22	217
95	0.0001902	36	136	16	236
96	0.0001678	104	163	24	222
97	0.0001936	1	135	16	269
98	0.0002361	71	160	20	249
99	0.0001793	35	121	23	207
100	0.0002017	37	142	26	247
101	0.0002218	20	153	26	286
102	0.0001898	29	127	28	225
103	0.0001744	56	132	16	208
104	0.000201	33	124	18	215
105	0.000188	3	117	12	231
106	0.0001862	81	169	26	257
107	0.0002115	22	153	27	284
108	0.0001734	97	170	16	243
109	0.0001693	160	224	24	288
110	0.0001855	35	120	13	205
111	0.0001978	7	112	13	217
112	0.0001797	178	230	20	282
113	0.0001819	90	143	17	196
114	0.0002226	41	119	19	197
115	0.0001897	18	122	23	226
116	0.0001791	86	182	21	278
117	0.0001956	7	126	24	245
118	0.0002035	102	160	21	218
119	0.0001994	67	170	25	273
120	0.0001688	221	258	23	295
121	0.0002186	24	125	16	226
122	0.0001774	50	132	19	214
123	0.0001829	15	98	13	181
124	0.0001797	19	101	17	183
125	0.0002289	8	120	15	232
126	0.0001761	109	168	22	227
127	0.0001671	128	182	22	236
128	0.0002085	64	158	16	252
129	0.0002072	52	167	20	282
130	0.00023	65	153	13	241
131	0.0001857	45	130	18	215
132	0.000186	9	115	16	221
133	0.0002557	33	133	20	233
134	0.0002047	9	114	27	219
135	0.0001829	50	147	14	244
136	0.0001865	11	122	15	233
137	0.0002019	53	158	23	263
138	0.0001846	74	149	23	224
139	0.0002489	57	154	18	251
140	0.0001899	60	158	29	256
141	0.0001923	43	154	29	265
142	0.0001875	43	144	21	245
143	0.0001854	64	160	22	256
144	0.0001903	2	105	15	208
145	0.0001908	6	130	23	254
146	0.0001811	104	177	18	250
147	0.0001903	38	118	17	198
148	0.0001717	139	211	21	283
149	0.0002151	52	148	16	244
150	0.0001877	83	156	17	229
151	0.0001741	27	115	19	203
152	0.0001952	101	158	18	215
153	0.0001773	21	116	18	211
154	0.0001918	15	135	16	255
155	0.0001965	44	142	17	240
156	0.0001888	8	113	15	218
157	0.0001852	64	165	16	266
158	0.0002229	27	138	26	249
159	0.0001819	80	164	18	248
160	0.0001717	84	157	18	230
161	0.0001703	88	140	13	192
162	0.0001836	25	132	23	239
163	0.000184	57	173	25	289
164	0.0001849	2	95	19	188
165	0.0001812	47	134	22	221
166	0.0001969	19	142	17	265
167	0.0002276	40	107	13	174
168	0.0002022	32	160	26	288
169	0.0001954	4	123	13	242
170	0.0002275	13	123	18	233
171	0.0001865	113	182	20	251
172	0.0001944	14	128	26	242
173	0.000195	136	205	19	274
174	0.0001711	153	209	28	265
175	0.0001845	21	122	15	223
176	0.0001741	132	190	17	248
177	0.0001823	81	169	18	257
178	0.0001931	3	121	25	239
179	0.0001888	223	269	24	315
180	0.0001765	117	196	23	275
181	0.0001882	62	158	15	254
182	0.0001906	18	110	12	202
183	0.0001851	87	172	26	257
184	0.0001706	120	180	22	240
185	0.0001892	162	207	18	252
186	0.0001715	108	172	17	236
187	0.0001841	0	110	14	220
188	0.0001768	93	168	16	243
189	0.0001993	24	126	26	228
190	0.0001858	51	140	22	229
191	0.0002065	82	170	20	258
192	0.0001758	111	180	14	249
193	0.0001943	125	209	25	293
194	0.0001793	85	157	13	229
195	0.0001902	22	124	19	226
196	0.0001804	61	153	24	245
197	0.0002507	75	156	27	237
198	0.0001918	20	122	22	224
199	0.0001856	59	166	22	273
200	0.000195	58	144	25	230
201	0.0001734	80	148	17	216
202	0.0001873	67	183	28	299
203	0.000197	30	144	18	258
204	0.0001836	92	174	23	256
205	0.0001716	105	167	26	229
206	0.0001746	86	161	16	236
207	0.0001886	46	148	17	250
208	0.000332	53	139	17	225
209	0.0001796	35	119	13	203
210	0.0001767	67	147	19	227
211	0.0001882	53	150	15	247
212	0.0001808	84	165	17	246
213	0.0001684	170	214	21	258
214	0.0001699	187	243	23	299
215	0.000177	63	142	22	221
216	0.000192	8	127	20	246
217	0.000173	134	187	21	240
218	0.0001845	115	184	29	253
219	0.0001909	30	136	15	242
220	0.0001812	67	147	23	227
221	0.0002013	35	142	23	249
222	0.0001829	40	131	21	222
223	0.0001848	85	176	28	267
224	0.0001915	26	141	17	256
225	0.0002201	132	203	28	274
226	0.0001797	118	189	18	260
227	0.0001882	97	168	19	239
228	0.000173	87	164	18	241
229	0.0002047	34	139	19	244
230	0.0002046	21	131	22	241
231	0.0001842	15	133	16	251
232	0.0001928	18	163	25	308
233	0.0001753	137	205	26	273
234	0.0001901	17	126	15	235
235	0.0002008	40	138	16	236
236	0.0002017	41	119	16	197
237	0.000186	52	145	18	238
238	0.0001817	59	136	18	213
239	0.0002065	12	113	20	214
240	0.0001898	82	197	27	312
241	0.0001921	16	122	16	228
242	0.0001795	3	100	15	197
243	0.0001789	81	164	15	247
244	0.0002051	7	133	15	259
245	0.0001704	148	207	23	266
246	0.0001765	74	149	16	224
247	0.0002202	112	192	28	272
248	0.0001893	19	132	16	245
249	0.0001935	10	122	18	234
250	0.0001796	80	157	19	234
251	0.0001838	39	130	16	221
252	0.0001811	66	133	15	200
253	0.000175	125	190	29	255
254	0.0002198	24	141	14	258
255	0.0002035	48	146	28	244
256	0.0001791	24	127	29	230
257	0.0001945	39	147	23	255
258	0.0001793	54	135	18	216
259	0.0001814	15	115	16	215
260	0.0001877	76	165	28	254
261	0.0001738	123	182	26	241
262	0.0001838	52	137	14	222
263	0.0002276	47	141	20	235
264	0.000182	61	146	14	231
265	0.0001913	51	162	24	273
266	0.0001927	34	123	18	212
267	0.0002159	21	119	19	217
268	0.0001889	21	139	15	257
269	0.0002414	55	158	15	261
270	0.0001921	119	182	16	245
271	0.0001827	64	152	17	240
272	0.00019	79	168	27	257
273	0.0001644	214	257	28	300
274	0.0001927	77	148	14	219
275	0.0001854	74	172	28	270
276	0.0001898	54	145	17	236
277	0.0001764	52	126	13	200
278	0.0001674	127	184	18	241
279	0.0001762	70	161	26	252
280	0.0002007	33	149	22	265
281	0.0002036	24	139	25	254
282	0.0001846	53	142	22	231
283	0.000226	44	127	13	210
284	0.0001712	45	119	12	193
285	0.0001899	72	149	19	226
286	0.0001912	39	144	15	249
287	0.0001727	78	145	17	212
288	0.0002206	78	167	17	256
289	0.0001856	21	116	14	211
290	0.0001777	114	176	20	238
291	0.0002474	113	173	16	233
292	0.0001981	76	150	14	224
293	0.0002118	52	149	18	246
294	0.0002091	1	113	15	225
295	0.0002164	32	136	16	240
296	0.000207	51	113	13	175
297	0.000191	14	146	29	278
298	0.0001882	30	144	14	258
299	0.0001972	5	145	22	285
300	0.0001864	15	119	13	223
301	0.0001813	44	131	14	218
302	0.0001755	47	114	20	181
303	0.000181	47	138	14	229
304	0.0001859	68	136	16	204
305	0.000192	16	126	24	236
306	0.0001729	125	203	18	281
307	0.0001964	36	156	29	276
308	0.0001709	87	148	12	209
309	0.0001864	60	161	23	262
310	0.0001746	150	197	26	244
311	0.0001892	36	123	12	210
312	0.0002064	94	163	24	232
313	0.0001994	18	126	14	234
314	0.0002029	49	157	22	265
315	0.000187	12	111	26	210
316	0.0001928	33	119	14	205
317	0.0002	28	132	29	236
318	0.0001706	117	175	27	233
319	0.0001686	116	175	20	234
320	0.0002054	33	124	15	215
321	0.0001787	90	170	14	250
322	0.0002243	57	146	19	235
323	0.0001853	58	146	16	234
324	0.0001847	95	181	23	267
325	0.0002411	115	185	21	255
326	0.0002103	108	175	20	242
327	0.0001671	162	204	23	246
328	0.0002141	103	165	18	227
329	0.0001824	49	116	17	183
330	0.0001685	147	199	27	251
331	0.0001799	114	192	16	270
332	0.0001797	34	138	17	242
333	0.0001939	173	217	26	261
334	0.000215	98	177	22	256
335	0.0001896	81	185	18	289
336	0.0001934	17	149	22	281
337	0.0001675	116	177	16	238
338	0.0002228	97	185	25	273
339	0.0001859	47	149	15	251
340	0.0001852	76	156	18	236
341	0.00018	89	168	18	247
342	0.0001732	94	159	26	224
343	0.0001959	73	143	19	213
344	0.0002284	19	114	16	209
345	0.0001958	25	147	19	269
346	0.0001745	136	200	23	264
347	0.0002013	6	121	18	236
348	0.0001809	62	151	21	240
349	0.0001953	8	97	15	186
350	0.0002023	47	148	26	249
351	0.0002037	15	108	16	201
352	0.0001927	7	123	23	239
353	0.000194	41	137	12	233
354	0.0001823	55	149	21	243
355	0.0001869	36	127	15	218
356	0.0001952	9	128	18	247
357	0.0001907	61	159	19	257
358	0.0001839	43	129	21	215
359	0.0002687	48	139	23	230
360	0.0001933	12	127	27	242
361	0.0001786	87	147	19	207
362	0.0001877	21	134	17	247
363	0.0002535	125	179	20	233
364	0.000212	24	138	22	252
365	0.0001796	120	205	28	290
366	0.0001732	99	163	18	227
367	0.0002293	1	116	19	231
368	0.0001693	133	194	19	255
369	0.0001739	67	151	21	235
370	0.0001815	58	143	16	228
371	0.0002311	28	109	15	190
372	0.0001998	6	106	15	206
373	0.0002096	52	147	18	242
374	0.000185	20	134	19	248
375	0.0001835	92	158	18	224
376	0.0001934	69	130	17	191
377	0.0001768	46	131	15	216
378	0.0001784	116	188	26	260
379	0.0002008	22	135	20	248
380	0.000183	2	114	18	226
381	0.0002073	9	122	16	235
382	0.0001926	66	144	16	222
383	0.000223	65	153	15	241
384	0.0001672	188	234	18	280
385	0.0001798	81	155	21	229
386	0.0002186	16	126	22	236
387	0.0001765	53	137	22	221
388	0.0001792	118	181	25	244
389	0.0001989	66	151	26	236
390	0.0001874	60	160	27	260
391	0.0002214	114	185	22	256
392	0.0001652	152	199	18	246
393	0.0002024	49	147	13	245
394	0.000164	101	162	27	223
395	0.0001894	117	181	23	245
396	0.0002195	76	143	15	210
397	0.0002076	99	159	28	219
398	0.0001815	113	163	18	213
399	0.0002099	29	124	29	219
400	0.000177	40	122	24	204
401	0.0001987	2	122	28	242
402	0.000203	84	167	21	250
403	0.0001924	25	115	16	205
404	0.0001806	40	137	27	234
405	0.000187	58	165	29	272
406	0.0001759	100	161	17	222
407	0.0002183	57	167	26	277
408	0.0002014	74	141	20	208
409	0.0001782	70	165	18	260
410	0.0001692	106	170	18	234
411	0.0002064	71	140	29	209
412	0.0001836	42	133	14	224
413	0.0002092	77	158	24	239
414	0.0001747	105	166	22	227
415	0.000199	19	116	19	213
416	0.0001883	25	138	22	251
417	0.0001837	153	205	19	257
418	0.000176	155	210	17	265
419	0.0002526	21	122	14	223
420	0.000204	26	134	15	242
421	0.0001855	4	115	16	226
422	0.0001861	48	151	25	254
423	0.0001861	17	129	17	241
424	0.0001662	120	178	20	236
425	0.0002081	53	145	14	237
426	0.0001911	52	169	19	286
427	0.000186	120	196	25	272
428	0.0001736	106	160	14	214
429	0.0002174	94	172	18	250
430	0.0002807	79	150	15	221
431	0.0001805	62	153	17	244
432	0.0001741	61	131	13	201
433	0.0001915	127	191	22	255
434	0.0001812	61	143	19	225
435	0.0001931	96	160	21	224
436	0.0001879	74	149	16	224
437	0.0001884	61	147	20	233
438	0.0002085	81	150	21	219
439	0.0001964	79	164	24	249
440	0.0002068	166	225	26	284
441	0.0001918	120	195	25	270
442	0.0001927	75	153	18	231
443	0.0001896	111	171	22	231
444	0.0002236	57	137	17	217
445	0.0002405	105	168	25	231
446	0.0001918	8	108	17	208
447	0.0002014	10	131	29	252
448	0.0002203	66	146	16	226
449	0.0001879	2	110	20	218
450	0.0001794	28	121	20	214
451	0.0001887	11	107	18	203
452	0.000182	45	140	20	235
453	0.0001853	131	193	18	255
454	0.0002008	104	186	15	268
455	0.0001726	123	188	18	253
456	0.0001826	39	139	27	239
457	0.0002061	111	183	19	255
458	0.000183	33	119	21	205
459	0.0001817	60	132	16	204
460	0.0002226	78	159	14	240
461	0.0001954	8	124	20	240
462	0.0002246	25	131	26	237
463	0.0001991	7	123	16	239
464	0.000192	4	130	21	256
465	0.000223	22	132	22	242
466	0.0001876	3	111	21	219
467	0.0001797	39	126	17	213
468	0.0001804	59	138	15	217
469	0.0001958	36	115	13	194
470	0.0001923	42	145	19	248
471	0.000206	84	167	25	250
472	0.0002005	4	126	17	248
473	0.0002104	48	161	16	274
474	0.0001694	150	202	24	254
475	0.0001694	77	135	12	193
476	0.0002168	55	151	13	247
477	0.0001684	77	147	16	217
478	0.0001916	29	131	23	233
479	0.0001886	146	208	17	270
480	0.0001859	18	128	13	238
481	0.0001726	124	184	21	244
482	0.0001904	68	145	16	222
483	0.0001591	175	220	21	265
484	0.0002144	60	140	20	220
485	0.0001956	55	141	14	227
486	0.0001929	19	118	16	217
487	0.0002006	45	142	22	239
488	0.000204	19	157	29	295
489	0.0001856	55	165	18	275
490	0.0002008	2	101	13	200
491	0.0002066	1	138	22	275
492	0.0002457	35	135	20	235
493	0.0001828	135	212	22	289
494	0.0002782	69	146	15	223
495	0.0001957	11	109	17	207
496	0.0002018	56	154	17	252
497	0.0001751	129	187	25	245
498	0.0001938	27	131	18	235
499	0.0001774	40	111	15	182
500	0.0001743	88	159	18	230
501	0.0001775	53	123	19	193
502	0.0002081	21	106	19	191
503	0.0002163	14	139	19	264
504	0.0001804	23	105	21	187
505	0.0001845	46	144	16	242
506	0.0001932	38	144	17	250
507	0.0001822	116	191	27	266
508	0.0001784	112	180	19	248
509	0.0001761	65	142	21	219
510	0.0002063	39	122	11	205
511	0.0001725	170	223	21	276
512	0.0001928	35	139	15	243
513	0.0001881	6	130	19	254
514	0.0001744	145	195	22	245
515	0.0001887	55	138	26	221
516	0.0001858	11	108	16	205
517	0.0001663	166	216	22	266
518	0.000188	114	170	23	226
519	0.0001845	20	128	27	236
520	0.0001833	17	127	21	237
521	0.0001742	43	120	13	197
522	0.0001932	13	122	14	231
523	0.0002512	10	116	16	222
524	0.0001869	18	125	13	232
525	0.0001924	14	119	15	224
526	0.000178	53	131	13	209
527	0.0001861	13	112	19	211
528	0.0001802	75	180	25	285
529	0.0001703	157	206	26	255
530	0.0001889	8	114	20	220
531	0.0001947	36	146	17	256
532	0.0001858	91	176	27	261
533	0.0001679	128	176	26	224
534	0.0002272	172	237	26	302
535	0.0002079	41	139	18	237
536	0.0001871	32	121	15	210
537	0.000173	120	181	18	242
538	0.0002108	54	166	28	278
539	0.0002005	18	139	20	260
540	0.0001893	21	123	22	225
541	0.0001692	180	232	19	284
542	0.0001865	61	150	15	239
543	0.0001788	105	154	18	203
544	0.0001936	37	140	18	243
545	0.0001848	25	137	27	249
546	0.0001834	95	162	15	229
547	0.0001802	93	167	21	241
548	0.0001851	95	170	20	245
549	0.0001756	95	167	21	239
550	0.0001926	15	125	18	235
551	0.0001928	93	177	29	261
552	0.0002003	64	141	17	218
553	0.0001939	12	102	15	192
554	0.0002062	13	138	16	263
555	0.0001774	86	150	24	214
556	0.0002105	53	142	14	231
557	0.0002026	25	117	14	209
558	0.0002094	33	157	16	281
559	0.0001669	139	193	26	247
560	0.0001993	12	138	18	264
561	0.0001633	181	216	21	251
562	0.0001783	128	204	23	280
563	0.0001716	44	119	15	194
564	0.0001731	134	191	18	248
565	0.0001954	7	109	15	211
566	0.0001821	63	150	17	237
567	0.0001776	64	137	17	210
568	0.0001846	103	179	25	255
569	0.000189	63	149	16	235
570	0.0001891	63	158	23	253
571	0.0002095	100	186	17	272
572	0.0001965	111	187	15	263
573	0.0002083	82	176	27	270
574	0.0001712	111	173	20	235
575	0.0001901	22	135	28	248
576	0.0002046	74	155	18	236
577	0.0001928	31	120	19	209
578	0.0001913	117	191	17	265
579	0.0002027	48	154	25	260
580	0.0001921	7	123	26	239
581	0.0001753	109	180	24	251
582	0.0001911	42	139	23	236
583	0.0001746	89	160	23	231
584	0.0001802	104	200	24	296
585	0.0002224	13	116	17	219
586	0.0002363	130	210	27	290
587	0.0001979	61	155	15	249
588	0.0001822	42	161	28	280
589	0.0001848	43	118	14	193
590	0.0002038	77	169	17	261
591	0.0001939	111	190	20	269
592	0.0001968	56	154	21	252
593	0.0001719	57	138	20	219
594	0.0001775	63	148	22	233
595	0.0001685	152	208	19	264
596	0.0001926	60	135	17	210
597	0.0002063	56	149	17	242
598	0.0001872	70	139	16	208
599	0.0001835	3	118	18	233
600	0.0001818	92	163	19	234
601	0.0001798	90	163	17	236
602	0.0001951	16	140	29	264
603	0.0001837	136	185	17	234
604	0.0001731	207	247	19	287
605	0.0001873	3	113	17	223
606	0.0001849	44	131	22	218
607	0.0001704	139	204	21	269
608	0.00018	15	102	15	189
609	0.000177	97	174	25	251
610	0.0002104	132	194	25	256
611	0.0001949	12	144	24	276
612	0.0002049	71	166	23	261
613	0.0001805	49	130	14	211
614	0.0001903	74	185	27	296
615	0.0001802	76	147	20	218
616	0.0001762	163	226	29	289
617	0.0001805	45	130	17	215
618	0.0001848	42	138	25	234
619	0.000159	197	247	20	297
620	0.0001942	36	158	20	280
621	0.0001945	50	146	20	242
622	0.000169	99	161	19	223
623	0.0002465	121	181	27	241
624	0.0001864	77	174	17	271
625	0.0002021	65	147	14	229
626	0.0001824	40	135	15	230
627	0.0002037	20	130	14	240
628	0.0001827	81	160	15	239
629	0.0001715	97	166	15	235
630	0.000178	93	169	22	245
631	0.0001898	42	119	15	196
632	0.0001969	77	149	24	221
633	0.0001766	184	248	29	312
634	0.0001957	1	99	14	197
635	0.0002276	107	185	19	263
636	0.0001869	18	147	26	276
637	0.0001872	127	200	17	273
638	0.0001958	29	136	19	243
639	0.0002007	4	126	24	248
640	0.0002034	4	105	12	206
641	0.0001952	2	127	15	252
642	0.0001964	10	140	26	270
643	0.0001879	178	226	28	274
644	0.0001712	60	131	15	202
645	0.0001757	77	157	16	237
646	0.0001811	75	149	17	223
647	0.0001793	65	152	26	239
648	0.0002493	11	112	17	213
649	0.0001782	53	135	21	217
650	0.0001869	6	114	15	222
651	0.0002001	17	130	14	243
652	0.0002116	81	177	29	273
653	0.0001789	11	110	11	209
654	0.0001941	92	178	19	264
655	0.0001932	54	145	23	236
656	0.0001852	37	139	21	241
657	0.0002078	43	139	20	235
658	0.0002102	83	142	13	201
659	0.0001785	47	140	17	233
660	0.0001893	2	119	14	236
661	0.000187	6	107	14	208
662	0.0002566	27	136	22	245
663	0.0001865	99	173	19	247
664	0.0001938	56	164	27	272
665	0.0001666	195	239	18	283
666	0.0001903	33	131	12	229
667	0.0001953	120	193	28	266
668	0.0001859	55	140	16	225
669	0.0001866	4	124	18	244
670	0.0001977	22	135	18	248
671	0.0001919	10	144	28	278
672	0.0001831	98	179	17	260
673	0.0001777	120	201	25	282
674	0.0002035	15	130	16	245
675	0.0001861	48	157	29	266
676	0.0002061	110	172	17	234
677	0.0001824	78	167	22	256
678	0.0001713	140	211	29	282
679	0.000197	58	144	18	230
680	0.0001973	71	139	16	207
681	0.0001911	47	142	23	237
682	0.0001842	53	150	14	247
683	0.0001719	126	179	29	232
684	0.000193	72	154	21	236
685	0.0002134	29	155	21	281
686	0.0002687	146	197	18	248
687	0.0001895	74	170	19	266
688	0.0001773	38	114	21	190
689	0.0001834	73	153	19	233
690	0.0001845	108	187	24	266
691	0.0001763	59	137	15	215
692	0.0001733	156	211	27	266
693	0.0001879	27	124	14	221
694	0.0001862	15	109	13	203
695	0.0001772	100	180	24	260
696	0.0001824	24	132	24	240
697	0.0002045	12	131	26	250
698	0.0002018	41	146	23	251
699	0.0001868	25	132	17	239
700	0.0001851	2	107	11	212
701	0.0001858	21	146	29	271
702	0.0001901	85	171	22	257
703	0.0001996	45	147	15	249
704	0.0001991	41	137	15	233
705	0.0001811	57	156	20	255
706	0.0002016	38	134	15	230
707	0.0002101	43	154	29	265
708	0.0001937	85	181	19	277
709	0.0001833	51	137	18	223
710	0.0002413	67	143	14	219
711	0.0002176	15	122	15	229
712	0.0001779	109	201	23	293
713	0.0001786	68	149	21	230
714	0.0001984	18	137	15	256
715	0.0001773	48	138	22	228
716	0.0001744	89	151	28	213
717	0.0001818	91	178	19	265
718	0.0001857	77	160	18	243
719	0.0001896	11	109	13	207
720	0.000237	64	134	16	204
721	0.0002036	20	125	14	230
722	0.0001791	49	138	13	227
723	0.0001773	81	166	29	251
724	0.0001841	87	168	17	249
725	0.0001831	87	169	27	251
726	0.0001792	56	139	24	222
727	0.0001972	29	152	25	275
728	0.000197	1	123	23	245
729	0.0001927	54	142	15	230
730	0.000187	91	164	19	237
731	0.0001913	34	116	18	198
732	0.000192	6	129	15	252
733	0.0001814	91	190	23	289
734	0.000179	41	120	20	199
735	0.0001923	49	154	14	259
736	0.0002015	32	146	28	260
737	0.0001678	136	200	26	264
738	0.0001911	8	129	18	250
739	0.0002036	74	152	19	230
740	0.0002027	127	197	25	267
741	0.0001852	18	125	22	232
742	0.0001984	38	136	18	234
743	0.0001842	106	187	22	268
744	0.0002141	113	158	24	203
745	0.0001987	37	128	28	219
746	0.0002007	69	168	18	267
747	0.0001936	11	124	17	237
748	0.0001906	60	156	18	252
749	0.0002168	49	151	22	253
750	0.0001709	230	263	23	296
751	0.0001806	33	130	14	227
752	0.000199	73	154	18	235
753	0.000181	85	168	16	251
754	0.0001957	95	164	18	233
755	0.0002088	35	139	17	243
756	0.0001959	40	132	20	224
757	0.0001861	72	146	20	220
758	0.00017	103	160	16	217
759	0.0001786	89	159	14	229
760	0.0001759	106	172	16	238
761	0.0001904	3	120	14	237
762	0.0001927	4	125	24	246
763	0.0001922	29	150	16	271
764	0.0001801	18	130	27	242
765	0.0002041	30	138	17	246
766	0.0001863	64	168	15	272
767	0.0002524	55	148	16	241
768	0.0001846	52	143	15	234
769	0.0001845	30	125	18	220
770	0.0002309	44	143	16	242
771	0.0001859	42	152	28	262
772	0.000193	29	128	16	227
773	0.0001628	162	222	22	282
774	0.0001779	102	162	17	222
775	0.0001879	83	147	28	211
776	0.0002115	34	114	17	194
777	0.0001753	65	155	14	245
778	0.000192	33	136	22	239
779	0.0001775	85	174	21	263
780	0.000194	40	126	12	212
781	0.0001979	0	137	17	274
782	0.0001717	137	197	18	257
783	0.0002079	75	153	25	231
784	0.0001785	42	145	25	248
785	0.0001854	5	133	17	261
786	0.0001904	3	121	14	239
787	0.0002416	114	201	29	288
788	0.0001738	78	161	21	244
789	0.0002042	26	129	13	232
790	0.0001931	35	145	25	255
791	0.0001857	87	175	22	263
792	0.0001825	17	122	15	227
793	0.0001837	17	123	18	229
794	0.0001813	44	134	17	224
795	0.0001842	37	116	15	195
796	0.0001988	32	150	18	268
797	0.000184	2	109	14	216
798	0.0002344	78	157	22	236
799	0.0002025	45	156	29	267
800	0.0001885	42	159	26	276
801	0.000223	33	144	14	255
802	0.0001714	151	202	19	253
803	0.0001742	119	179	18	239
804	0.0002192	92	154	21	216
805	0.0001852	28	126	23	224
806	0.0001881	11	138	15	265
807	0.0001904	21	112	13	203
808	0.0001868	23	130	16	237
809	0.0002003	39	140	13	241
810	0.000268	35	165	29	295
811	0.0001981	4	126	19	248
812	0.0001954	78	179	25	280
813	0.0001899	53	145	17	237
814	0.0001899	7	116	13	225
815	0.000211	83	169	17	255
816	0.0002739	93	174	22	255
817	0.0002208	21	119	15	217
818	0.0001778	131	183	23	235
819	0.0001892	22	142	28	262
820	0.0001788	31	117	17	203
821	0.0001758	46	131	17	216
822	0.0001866	14	101	12	188
823	0.0001835	242	285	25	328
824	0.0002238	66	170	26	274
825	0.0001716	120	180	14	240
826	0.0001822	108	176	21	244
827	0.0001872	12	107	13	202
828	0.0002028	9	122	28	235
829	0.0001857	50	139	13	228
830	0.0001746	38	120	23	202
831	0.0002023	25	141	18	257
832	0.0001882	21	130	18	239
833	0.0001796	68	152	16	236
834	0.0001727	108	177	17	246
835	0.0001812	144	225	27	306
836	0.000171	75	142	13	209
837	0.0002032	61	142	18	223
838	0.0001831	65	162	28	259
839	0.0001999	20	131	24	242
840	0.0001704	106	164	18	222
841	0.0001904	1	103	15	205
842	0.0002019	32	112	14	192
843	0.0001772	66	143	15	220
844	0.0001805	70	169	15	268
845	0.0002504	102	178	16	254
846	0.0002095	51	149	17	247
847	0.0001807	102	164	21	226
848	0.0001826	62	145	16	228
849	0.0001861	5	111	14	217
850	0.0002093	1	114	14	227
851	0.0001678	133	194	23	255
852	0.0002024	60	170	27	280
853	0.0001944	9	117	15	225
854	0.0001733	85	150	18	215
855	0.0002031	91	174	18	257
856	0.0001911	133	199	21	265
857	0.0002214	90	156	27	222
858	0.0001968	6	128	20	250
859	0.0001794	136	209	25	282
860	0.0001894	18	125	18	232
861	0.0001984	118	192	25	266
862	0.0001708	80	154	20	228
863	0.0001862	122	176	17	230
864	0.0001965	53	145	21	237
865	0.0001815	10	111	18	212
866	0.0001894	42	138	14	234
867	0.000192	93	172	23	251
868	0.0001889	32	146	15	260
869	0.0001683	137	183	20	229
870	0.0001904	5	116	15	227
871	0.0002028	15	125	14	235
872	0.0002098	16	126	17	236
873	0.0001831	95	180	15	265
874	0.0001893	15	117	13	219
875	0.0001803	57	141	15	225
876	0.000182	102	194	20	286
877	0.0002143	34	148	25	262
878	0.0001789	59	150	14	241
879	0.0002003	124	199	24	274
880	0.0001912	27	140	14	253
881	0.0001875	144	210	21	276
882	0.0001903	11	123	23	235
883	0.0001909	19	148	27	277
884	0.0001807	64	156	18	248
885	0.0001755	89	166	19	243
886	0.0002306	85	157	27	229
887	0.0001861	3	118	18	233
888	0.0001775	56	144	26	232
889	0.0001895	65	170	17	275
890	0.000185	74	156	24	238
891	0.0002177	87	170	23	253
892	0.0001794	38	133	23	228
893	0.0002064	32	147	28	262
894	0.000197	83	165	23	247
895	0.0001838	57	157	15	257
896	0.000218	63	160	19	257
897	0.0001882	19	121	18	223
898	0.0001869	0	98	12	196
899	0.0001874	63	156	26	249
900	0.000197	3	112	14	221
901	0.0001769	41	123	14	205
902	0.0001815	106	178	20	250
903	0.0001949	59	156	15	253
904	0.000182	52	139	22	226
905	0.0001645	162	207	21	252
906	0.0001901	22	136	14	250
907	0.0001803	51	139	17	227
908	0.0001715	77	152	27	227
909	0.0002097	141	189	23	237
910	0.0002397	30	129	12	228
911	0.0001788	133	207	18	281
912	0.0001975	2	132	16	262
913	0.0001846	50	162	16	274
914	0.000177	60	153	22	246
915	0.0002038	58	152	23	246
916	0.0002033	24	119	16	214
917	0.0001995	5	145	27	285
918	0.0001877	38	149	29	260
919	0.0001853	81	184	25	287
920	0.0001874	43	140	14	237
921	0.0001852	24	124	28	224
922	0.0002037	105	175	20	245
923	0.0001839	29	121	19	213
924	0.0002187	36	132	16	228
925	0.0002372	109	179	27	249
926	0.0002117	71	152	23	233
927	0.0001846	137	214	22	291
928	0.0001645	189	232	26	275
929	0.0001956	80	194	27	308
930	0.0002204	23	144	20	265
931	0.0001922	17	127	15	237
932	0.000181	88	154	18	220
933	0.0002055	60	138	12	216
934	0.0001854	115	204	26	293
935	0.0001872	73	152	21	231
936	0.0001937	20	130	19	240
937	0.0002156	25	142	28	259
938	0.0001849	77	162	28	247
939	0.000179	100	181	19	262
940	0.0001915	24	126	17	228
941	0.0001888	57	149	23	241
942	0.0001894	7	117	19	227
943	0.0001928	68	154	22	240
944	0.0001719	75	159	18	243
945	0.0001835	7	109	13	211
946	0.0001803	118	172	22	226
947	0.0001925	25	125	12	225
948	0.0001784	93	152	15	211
949	0.0001761	96	157	17	218
950	0.0002079	1	113	18	225
951	0.0001836	22	120	26	218
952	0.0001821	54	123	15	192
953	0.0001643	157	204	26	251
954	0.0001809	145	198	20	251
955	0.0001868	103	208	28	313
956	0.0001919	166	218	19	270
957	0.0001864	37	121	28	205
958	0.0001873	58	135	20	212
959	0.0002074	37	148	22	259
960	0.0001824	23	134	15	245
961	0.0002398	54	138	15	222
962	0.0001971	53	151	17	249
963	0.0001918	52	139	18	226
964	0.0001734	69	146	18	223
965	0.0002034	19	136	13	253
966	0.0001857	65	145	16	225
967	0.0002246	62	153	21	244
968	0.0001742	68	150	29	232
969	0.0001723	70	152	24	234
970	0.0002415	65	167	23	269
971	0.0002259	38	148	26	258
972	0.0002108	17	144	21	271
973	0.0001854	5	122	14	239
974	0.0001823	32	131	28	230
975	0.0002233	13	135	13	257
976	0.0001753	97	162	19	227
977	0.0001657	112	175	19	238
978	0.000182	27	127	19	227
979	0.0001958	29	148	15	267
980	0.0001856	78	155	22	232
981	0.0001728	87	163	14	239
982	0.0001827	51	129	13	207
983	0.0001856	86	155	24	224
984	0.0001839	104	165	19	226
985	0.0002112	62	174	18	286
986	0.0001808	21	124	17	227
987	0.0001837	35	132	16	229
988	0.0001806	102	190	29	278
989	0.0001892	115	192	20	269
990	0.0001893	19	128	16	237
991	0.0001835	133	188	21	243
992	0.0001846	34	144	23	254
993	0.0002626	35	153	25	271
994	0.0001838	30	134	24	238
995	0.0001849	61	136	19	211
996	0.0001897	61	157	15	253
997	0.0001896	14	115	20	216
998	0.0002214	68	163	16	258
999	0.0001977	10	110	13	210
mean	0.000192305	62.114	151.252	19.663	240.39

## Sheet: GS_FemaleOpt
	time	SEq	Bal	Reg	Egal
0	0.0002087	6	132	28	258
1	0.0002756	121	196	24	271
2	0.000204	7	111	14	215
3	0.0001974	41	147	19	253
4	0.000199	25	139	20	253
5	0.000195	7	101	16	195
6	0.0001852	71	144	15	217
7	0.0002188	23	131	17	239
8	0.0001822	35	138	27	241
9	0.0002054	4	118	18	232
10	0.0002246	38	134	16	230
11	0.0001806	30	134	22	238
12	0.0001957	32	109	17	186
13	0.0001884	66	164	19	262
14	0.0001875	125	198	22	271
15	0.0001827	98	169	19	240
16	0.0001801	40	132	19	224
17	0.0001953	43	164	14	285
18	0.0001827	26	130	14	234
19	0.0002007	15	121	14	227
20	0.0001994	20	134	15	248
21	0.0002452	62	160	18	258
22	0.0002038	12	139	26	266
23	0.0001956	32	121	18	210
24	0.0001929	64	148	18	232
25	0.0001714	103	164	15	225
26	0.000212	52	130	18	208
27	0.0001737	61	143	14	225
28	0.0002026	3	116	16	229
29	0.0001756	121	170	14	219
30	0.0002187	85	157	18	229
31	0.000217	84	175	24	266
32	0.0001748	158	205	28	252
33	0.0001857	68	169	20	270
34	0.0001877	43	163	28	283
35	0.0001739	67	140	16	213
36	0.0001805	39	123	21	207
37	0.0001916	100	177	20	254
38	0.0003609	61	151	16	241
39	0.0002342	49	146	16	243
40	0.0001998	24	150	27	276
41	0.0002058	67	147	18	227
42	0.0003587	58	152	28	246
43	0.000178	116	199	26	282
44	0.0001877	14	113	24	212
45	0.0002013	62	163	21	264
46	0.0001807	71	168	18	265
47	0.0001911	31	122	18	213
48	0.0001832	99	200	21	301
49	0.0001981	32	148	17	264
50	0.0001848	73	164	15	255
51	0.0002069	27	165	28	303
52	0.0001971	2	112	21	222
53	0.0002011	131	208	29	285
54	0.0002187	60	147	17	234
55	0.0001882	12	129	26	246
56	0.0001905	91	170	20	249
57	0.0001783	40	124	18	208
58	0.0001849	39	130	20	221
59	0.0002221	152	199	18	246
60	0.0001855	44	141	18	238
61	0.0001899	51	137	26	223
62	0.000181	93	175	18	257
63	0.0001804	125	199	26	273
64	0.0002912	24	149	26	274
65	0.000182	97	178	24	259
66	0.0001761	48	118	17	188
67	0.0001934	8	117	20	226
68	0.0001945	22	130	15	238
69	0.0001792	72	162	12	252
70	0.0001846	55	144	21	233
71	0.0001661	130	186	20	242
72	0.0001684	154	206	22	258
73	0.0001879	41	143	17	245
74	0.0001877	56	168	26	280
75	0.0002122	124	190	17	256
76	0.0001959	14	136	16	258
77	0.0001882	87	152	16	217
78	0.0002213	31	142	23	253
79	0.000193	55	131	16	207
80	0.0002744	67	156	16	245
81	0.0001902	123	209	23	295
82	0.0002142	36	177	27	318
83	0.0001735	109	178	18	247
84	0.0001817	60	143	27	226
85	0.000174	116	178	28	240
86	0.000202	92	161	20	230
87	0.0001602	203	242	18	281
88	0.0002037	40	138	20	236
89	0.0002295	47	123	19	199
90	0.0001855	108	187	19	266
91	0.0001857	31	138	28	245
92	0.0002029	72	166	23	260
93	0.0001888	74	151	14	228
94	0.0001921	43	132	19	221
95	0.0001983	130	211	18	292
96	0.0001878	27	122	28	217
97	0.0001886	25	144	22	263
98	0.0001722	115	180	18	245
99	0.0001817	59	130	14	201
100	0.0002138	37	142	26	247
101	0.0001893	20	149	26	278
102	0.0002111	29	127	28	225
103	0.0001986	33	128	24	223
104	0.0002064	12	112	16	212
105	0.0001794	92	173	24	254
106	0.0001929	13	131	17	249
107	0.0002491	22	153	27	284
108	0.000219	74	152	16	230
109	0.0001844	36	136	18	236
110	0.0002179	35	124	16	213
111	0.0001953	46	130	14	214
112	0.0001861	24	134	19	244
113	0.0001777	64	133	18	202
114	0.0001834	8	96	19	184
115	0.0001863	18	122	23	226
116	0.0001978	14	155	16	296
117	0.0001963	7	126	24	245
118	0.0002332	41	131	15	221
119	0.0001802	68	167	25	266
120	0.0001906	15	136	27	257
121	0.0001955	54	139	16	224
122	0.0001708	123	182	24	241
123	0.0001955	15	98	13	181
124	0.0002257	39	122	19	205
125	0.0001823	117	186	20	255
126	0.0001738	61	133	16	205
127	0.0001762	32	116	29	200
128	0.0002029	19	140	16	261
129	0.0001919	23	152	20	281
130	0.0001938	104	177	20	250
131	0.0001725	86	157	29	228
132	0.0001969	61	134	16	207
133	0.0001866	17	128	20	239
134	0.0001836	99	175	27	251
135	0.0002216	33	135	14	237
136	0.0002217	27	135	18	243
137	0.0001959	7	129	14	251
138	0.0001899	150	209	20	268
139	0.0001789	186	233	22	280
140	0.0002175	27	141	29	255
141	0.0001994	43	154	29	265
142	0.0001754	83	160	19	237
143	0.0001802	114	193	18	272
144	0.0001763	48	121	15	194
145	0.0001807	58	149	16	240
146	0.000195	82	148	18	214
147	0.000172	105	157	15	209
148	0.000178	45	138	20	231
149	0.000177	49	148	16	247
150	0.0002398	38	126	17	214
151	0.0001958	27	115	19	203
152	0.0001797	61	140	15	219
153	0.0001813	32	117	12	202
154	0.0002143	42	145	16	248
155	0.0002026	44	142	17	240
156	0.0002025	23	118	15	213
157	0.0002132	106	175	19	244
158	0.0001823	27	135	26	243
159	0.0001827	90	171	19	252
160	0.0001792	31	128	19	225
161	0.0002109	27	116	15	205
162	0.0001853	69	147	14	225
163	0.0001847	33	151	25	269
164	0.0001699	87	153	20	219
165	0.0001973	23	118	22	213
166	0.0001876	73	171	18	269
167	0.0002086	96	139	16	182
168	0.0001932	32	160	26	288
169	0.000223	139	202	19	265
170	0.000179	142	204	18	266
171	0.0001971	112	180	23	248
172	0.0001926	98	179	21	260
173	0.0002207	108	187	19	266
174	0.0001738	125	198	19	271
175	0.0001931	21	122	15	223
176	0.0001768	50	127	20	204
177	0.0001644	128	187	21	246
178	0.0001843	52	147	25	242
179	0.0001961	158	210	19	262
180	0.0001902	20	146	23	272
181	0.0001833	69	163	19	257
182	0.0001771	132	185	16	238
183	0.000193	4	118	16	232
184	0.0001933	54	134	17	214
185	0.0001978	17	130	20	243
186	0.0001915	65	143	16	221
187	0.0002087	79	152	18	225
188	0.0001941	33	135	16	237
189	0.0001763	102	162	18	222
190	0.0001694	132	197	19	262
191	0.0001864	84	162	15	240
192	0.0001911	106	173	24	240
193	0.0002045	43	152	24	261
194	0.0001759	42	134	12	226
195	0.0001853	22	124	19	226
196	0.0001986	45	143	24	241
197	0.0001832	54	142	20	230
198	0.0002002	15	120	22	225
199	0.0002076	28	140	22	252
200	0.0001955	31	113	12	195
201	0.0001871	15	120	17	225
202	0.0002138	54	175	28	296
203	0.0001842	81	177	23	273
204	0.0001739	160	200	27	240
205	0.0001868	66	149	18	232
206	0.0001846	52	136	13	220
207	0.0002043	36	144	17	252
208	0.0001862	40	124	12	208
209	0.0001829	110	174	16	238
210	0.0001892	23	112	18	201
211	0.0001829	53	160	20	267
212	0.000197	32	140	17	248
213	0.0001736	65	135	20	205
214	0.0001784	72	167	22	262
215	0.0002084	46	131	16	216
216	0.0001856	46	143	18	240
217	0.0002177	121	180	21	239
218	0.0002231	36	122	15	208
219	0.0001838	30	136	15	242
220	0.0002061	67	147	23	227
221	0.0001871	17	129	16	241
222	0.0001847	9	118	21	227
223	0.0002356	9	137	16	265
224	0.0001839	42	153	16	264
225	0.0001834	94	168	21	242
226	0.0001772	118	192	19	266
227	0.0001816	39	122	17	205
228	0.0001912	38	131	18	224
229	0.0001607	160	211	19	262
230	0.0001947	37	130	13	223
231	0.0002004	118	176	14	234
232	0.0001961	31	166	25	301
233	0.0002273	137	205	26	273
234	0.0002027	76	173	20	270
235	0.0001947	71	154	16	237
236	0.0002548	60	137	22	214
237	0.0001884	12	118	13	224
238	0.0002056	65	133	17	201
239	0.000195	152	194	20	236
240	0.0001896	4	139	27	274
241	0.0001786	92	163	16	234
242	0.0002089	44	123	17	202
243	0.0001793	71	169	19	267
244	0.0001894	111	194	15	277
245	0.0001914	166	215	20	264
246	0.0001909	32	133	13	234
247	0.0001923	61	151	18	241
248	0.0001943	2	126	16	250
249	0.0002063	33	129	18	225
250	0.0001946	33	131	19	229
251	0.0001818	139	194	24	249
252	0.0001808	18	123	24	228
253	0.0001791	85	159	19	233
254	0.0001822	95	177	18	259
255	0.0001875	48	146	28	244
256	0.0002616	24	127	29	230
257	0.0002019	39	147	23	255
258	0.000181	36	117	18	198
259	0.000185	47	144	26	241
260	0.0002459	43	142	16	241
261	0.0001975	56	141	16	226
262	0.0001761	131	171	13	211
263	0.0001741	104	183	19	262
264	0.0002081	61	140	16	219
265	0.0002152	35	151	24	267
266	0.0001877	34	123	18	212
267	0.0001851	77	156	25	235
268	0.0001855	104	188	22	272
269	0.0001745	112	187	13	262
270	0.0001956	20	133	12	246
271	0.0001852	68	166	19	264
272	0.0002209	60	143	27	226
273	0.0001841	62	147	17	232
274	0.0001699	196	237	29	278
275	0.0002186	43	145	28	247
276	0.000178	29	135	15	241
277	0.0001863	46	138	16	230
278	0.0002022	23	136	17	249
279	0.0001911	9	134	26	259
280	0.0001796	75	167	22	259
281	0.0002043	24	139	25	254
282	0.0001855	20	118	22	216
283	0.0001899	42	135	21	228
284	0.0001838	2	104	20	206
285	0.0001856	48	140	13	232
286	0.0002117	25	136	14	247
287	0.0001909	23	117	17	211
288	0.0001946	78	167	17	256
289	0.0001822	12	112	14	212
290	0.0002031	36	135	14	234
291	0.0002187	113	173	16	233
292	0.0001894	14	104	14	194
293	0.0001794	76	167	18	258
294	0.000201	49	142	15	235
295	0.0001927	13	133	16	253
296	0.0001865	72	132	20	192
297	0.0001908	5	138	29	271
298	0.0001677	203	256	25	309
299	0.0002071	151	223	26	295
300	0.0002024	126	188	20	250
301	0.000179	147	210	22	273
302	0.0001851	21	102	20	183
303	0.0001928	37	123	14	209
304	0.000191	96	157	21	218
305	0.0001877	16	126	24	236
306	0.0002322	125	203	18	281
307	0.0003746	78	191	28	304
308	0.0001928	49	129	21	209
309	0.0001995	143	216	22	289
310	0.0002376	86	162	18	238
311	0.0001768	58	134	18	210
312	0.0001917	14	111	16	208
313	0.0001904	47	142	15	237
314	0.0001803	103	188	21	273
315	0.0001865	12	111	26	210
316	0.0001747	118	171	18	224
317	0.000223	41	135	29	229
318	0.0001727	161	211	28	261
319	0.0001926	49	147	22	245
320	0.0001734	103	161	15	219
321	0.000175	90	162	15	234
322	0.0001764	127	186	23	245
323	0.0001931	2	120	16	238
324	0.0001849	25	133	15	241
325	0.0001786	115	185	21	255
326	0.0001765	108	175	20	242
327	0.0002359	82	158	20	234
328	0.0001902	32	124	15	216
329	0.0001694	131	178	20	225
330	0.0001734	82	141	14	200
331	0.0001906	68	154	18	240
332	0.0001964	35	147	19	259
333	0.0001821	138	204	21	270
334	0.0001861	143	211	23	279
335	0.0001934	107	177	15	247
336	0.0001767	118	197	21	276
337	0.0002072	42	126	11	210
338	0.0002139	20	129	25	238
339	0.0001979	57	159	29	261
340	0.0001907	0	109	26	218
341	0.0001903	19	131	19	243
342	0.00017	123	167	17	211
343	0.00016	160	199	22	238
344	0.0002675	19	114	16	209
345	0.0001969	31	146	19	261
346	0.0001945	9	132	28	255
347	0.0001793	65	154	18	243
348	0.0001881	30	131	16	232
349	0.0001663	116	157	16	198
350	0.0001978	47	148	26	249
351	0.0001889	43	119	16	195
352	0.0002203	29	140	23	251
353	0.0001739	109	162	15	215
354	0.000189	21	130	15	239
355	0.000172	121	187	27	253
356	0.0001974	93	184	18	275
357	0.000175	111	188	20	265
358	0.0001923	43	129	21	215
359	0.0002172	123	181	25	239
360	0.0001825	33	136	27	239
361	0.0001901	54	159	27	264
362	0.0001907	21	134	17	247
363	0.0001861	22	127	17	232
364	0.0001882	44	153	22	262
365	0.000181	137	194	28	251
366	0.0001919	20	126	14	232
367	0.000189	26	134	19	242
368	0.0001788	210	265	19	320
369	0.0001829	3	110	15	217
370	0.0002077	99	153	17	207
371	0.0001752	16	109	16	202
372	0.0002719	51	137	16	223
373	0.0001771	65	143	14	221
374	0.0002052	73	181	21	289
375	0.00019	36	125	15	214
376	0.0001757	69	130	17	191
377	0.0001751	85	158	16	231
378	0.0001751	91	158	18	225
379	0.0001776	121	185	16	249
380	0.0001741	68	157	19	246
381	0.0001894	54	148	16	242
382	0.0001825	41	122	14	203
383	0.000178	82	161	15	240
384	0.0002088	17	147	21	277
385	0.000173	114	180	21	246
386	0.0001846	31	138	22	245
387	0.0002143	41	133	22	225
388	0.0001952	68	146	18	224
389	0.0002014	30	136	26	242
390	0.0001636	169	215	24	261
391	0.0002059	194	243	20	292
392	0.0002239	22	136	17	250
393	0.0001706	93	161	14	229
394	0.0002	131	198	20	265
395	0.0002114	55	145	25	235
396	0.0001837	76	143	15	210
397	0.0002068	45	130	24	215
398	0.0002509	51	122	14	193
399	0.0001893	25	119	29	213
400	0.0001889	16	109	16	202
401	0.0001907	17	132	28	247
402	0.0001929	21	130	16	239
403	0.0001955	121	177	19	233
404	0.0001864	72	163	21	254
405	0.0002108	31	141	29	251
406	0.0001958	40	124	19	208
407	0.0001935	57	167	26	277
408	0.000173	74	141	20	208
409	0.0001908	54	151	13	248
410	0.0001763	79	164	28	249
411	0.0001867	63	141	16	219
412	0.0002293	13	118	13	223
413	0.0001773	109	172	25	235
414	0.0001867	12	117	16	222
415	0.000197	39	132	19	225
416	0.000196	4	133	20	262
417	0.0001785	5	113	13	221
418	0.0002005	15	129	12	243
419	0.0001836	21	122	14	223
420	0.0001838	65	158	18	251
421	0.0002037	58	145	14	232
422	0.0001834	76	149	14	222
423	0.0001888	60	147	16	234
424	0.0001826	81	177	21	273
425	0.0001988	79	158	14	237
426	0.0001851	122	193	29	264
427	0.0002134	66	160	25	254
428	0.0002115	12	125	26	238
429	0.0001739	128	199	18	270
430	0.000184	93	166	17	239
431	0.0001935	45	162	22	279
432	0.0002084	113	174	25	235
433	0.0001865	41	126	17	211
434	0.0002305	49	136	19	223
435	0.0001687	150	210	18	270
436	0.0001863	20	124	18	228
437	0.0001991	151	202	27	253
438	0.0001777	122	182	15	242
439	0.0001946	38	139	18	240
440	0.0002429	14	119	14	224
441	0.0002006	55	137	13	219
442	0.0001817	72	147	15	222
443	0.0001886	6	112	16	218
444	0.0001965	37	126	17	215
445	0.0001724	113	181	16	249
446	0.0001941	29	118	12	207
447	0.0001925	12	129	29	246
448	0.0001874	3	109	15	215
449	0.000192	73	148	20	223
450	0.0001855	30	123	17	216
451	0.0001719	99	169	22	239
452	0.0001897	46	145	27	244
453	0.0001752	154	230	16	306
454	0.0002413	92	192	16	292
455	0.0001912	31	133	17	235
456	0.0001911	6	115	18	224
457	0.0001891	120	199	19	278
458	0.0001948	33	119	21	205
459	0.0001884	5	104	12	203
460	0.0002121	2	120	15	238
461	0.0002209	145	216	20	287
462	0.0001826	48	150	26	252
463	0.0001843	39	146	24	253
464	0.000205	25	133	18	241
465	0.0001894	50	143	18	236
466	0.0001795	50	135	19	220
467	0.0002073	7	109	19	211
468	0.0001894	28	124	15	220
469	0.0002083	36	115	13	194
470	0.0002232	50	151	19	252
471	0.0001865	63	162	20	261
472	0.0002254	94	175	15	256
473	0.0001777	116	205	21	294
474	0.0001716	98	164	22	230
475	0.0001748	110	173	26	236
476	0.0002173	59	159	19	259
477	0.0001742	86	161	16	236
478	0.0002199	4	118	23	232
479	0.0001972	5	121	16	237
480	0.0001784	92	175	19	258
481	0.000174	107	162	20	217
482	0.0001861	137	206	27	275
483	0.0001726	80	162	19	244
484	0.0001822	59	150	18	241
485	0.0001679	144	201	29	258
486	0.0001834	73	152	14	231
487	0.0001814	66	154	22	242
488	0.0001883	19	157	29	295
489	0.0002012	44	161	18	278
490	0.0002087	108	168	21	228
491	0.0002026	17	140	17	263
492	0.0001835	57	147	20	237
493	0.0002001	7	131	16	255
494	0.0001777	109	178	15	247
495	0.0001758	56	140	20	224
496	0.0001866	56	154	17	252
497	0.0001838	1	111	17	221
498	0.0001763	80	154	23	228
499	0.0001829	102	153	15	204
500	0.00019	31	124	13	217
501	0.0001813	63	136	19	209
502	0.0002018	104	163	21	222
503	0.0001865	51	153	19	255
504	0.0001749	95	141	15	187
505	0.0001939	34	135	20	236
506	0.0001787	107	189	26	271
507	0.0001842	32	135	12	238
508	0.000201	24	135	19	246
509	0.000186	31	126	15	221
510	0.0001738	79	152	22	225
511	0.0002001	48	139	19	230
512	0.0001894	51	135	17	219
513	0.0001908	88	173	19	258
514	0.0002086	37	122	17	207
515	0.0001954	45	127	21	209
516	0.000183	32	117	16	202
517	0.0002236	122	210	20	298
518	0.0001715	131	180	22	229
519	0.0001928	99	178	20	257
520	0.0001734	58	139	17	220
521	0.0001932	43	120	13	197
522	0.0001825	79	161	17	243
523	0.000192	11	118	16	225
524	0.0001754	104	166	14	228
525	0.0002152	42	133	15	224
526	0.0001921	81	171	16	261
527	0.0001985	13	112	19	211
528	0.0001984	11	141	25	271
529	0.0001933	9	127	16	245
530	0.0001972	76	147	24	218
531	0.0001942	0	124	18	248
532	0.0002103	51	158	29	265
533	0.0001763	120	173	18	226
534	0.0001979	2	126	16	250
535	0.0002193	7	121	16	235
536	0.0001829	33	124	21	215
537	0.0001765	109	180	25	251
538	0.0001832	86	185	28	284
539	0.0002038	65	167	27	269
540	0.0001941	21	123	22	225
541	0.0001982	64	189	29	314
542	0.0001938	25	132	14	239
543	0.0001842	29	126	18	223
544	0.0001892	37	140	18	243
545	0.0001949	3	126	27	249
546	0.0001994	61	148	18	235
547	0.0001773	101	166	19	231
548	0.0001913	21	119	18	217
549	0.0001611	166	200	19	234
550	0.0001983	58	150	16	242
551	0.0001814	126	206	24	286
552	0.0001971	11	122	18	233
553	0.0001801	78	145	16	212
554	0.0002561	100	175	18	250
555	0.0001965	32	124	24	216
556	0.0001962	42	141	20	240
557	0.0001954	36	129	18	222
558	0.0001828	121	216	20	311
559	0.0001716	106	165	19	224
560	0.0002315	12	138	18	264
561	0.000185	32	117	18	202
562	0.0001925	121	207	28	293
563	0.0001835	16	102	13	188
564	0.0001989	31	134	19	237
565	0.0001825	37	128	15	219
566	0.0001947	6	118	16	230
567	0.0001736	88	146	16	204
568	0.0002111	23	135	25	247
569	0.0001807	62	145	14	228
570	0.0001833	56	156	28	256
571	0.0001859	50	157	20	264
572	0.0002135	92	177	15	262
573	0.000176	97	185	27	273
574	0.0002155	75	144	14	213
575	0.0001864	42	143	28	244
576	0.0002103	74	155	18	236
577	0.0002155	67	143	19	219
578	0.0001937	3	128	16	253
579	0.0001848	62	162	25	262
580	0.0001819	21	126	26	231
581	0.0002029	58	150	21	242
582	0.0001947	42	139	23	236
583	0.00017	101	153	19	205
584	0.0001877	42	158	21	274
585	0.0001793	86	161	16	236
586	0.0001794	78	162	22	246
587	0.0001811	100	178	23	256
588	0.0001942	1	142	28	283
589	0.0001891	24	106	14	188
590	0.0001814	65	169	23	273
591	0.000203	87	165	15	243
592	0.0002002	111	183	19	255
593	0.0001908	45	133	18	221
594	0.0001769	91	161	19	231
595	0.000189	20	133	19	246
596	0.0001818	60	142	19	224
597	0.0001841	102	166	16	230
598	0.0001641	120	173	22	226
599	0.0001836	70	156	18	242
600	0.0001821	23	116	16	209
601	0.0002079	38	136	13	234
602	0.0001791	75	166	29	257
603	0.0002026	64	155	17	246
604	0.0001716	146	195	22	244
605	0.0001814	67	149	18	231
606	0.0001869	124	170	24	216
607	0.0001848	72	173	19	274
608	0.0001775	83	157	18	231
609	0.0001914	35	141	17	247
610	0.0002151	79	160	14	241
611	0.0001962	37	159	24	281
612	0.0001825	97	180	23	263
613	0.0001952	35	120	14	205
614	0.0002037	17	153	27	289
615	0.0001967	25	121	14	217
616	0.0002131	113	161	16	209
617	0.0001771	65	154	18	243
618	0.0001851	19	128	25	237
619	0.000184	107	176	19	245
620	0.0002003	16	142	19	268
621	0.0001979	1	120	24	239
622	0.0001986	73	137	17	201
623	0.0002808	18	123	15	228
624	0.0002024	18	129	19	240
625	0.0001835	98	173	14	248
626	0.0001834	55	148	16	241
627	0.000194	177	226	27	275
628	0.0002277	56	152	15	248
629	0.000192	17	137	18	257
630	0.0001788	129	200	25	271
631	0.0001846	42	119	15	196
632	0.0002186	48	131	24	214
633	0.0001905	142	197	20	252
634	0.0001915	103	156	20	209
635	0.0001828	132	191	19	250
636	0.0001846	196	251	28	306
637	0.0002097	73	168	19	263
638	0.0001727	68	142	19	216
639	0.000194	4	126	24	248
640	0.000183	38	123	12	208
641	0.0001918	133	210	22	287
642	0.0001882	25	155	23	285
643	0.0001947	23	136	15	249
644	0.0001948	4	99	15	194
645	0.0001955	64	154	19	244
646	0.0001723	115	179	29	243
647	0.0001804	77	164	25	251
648	0.0001828	60	143	22	226
649	0.0001967	25	122	21	219
650	0.0002021	6	114	15	222
651	0.0001942	52	143	15	234
652	0.0001821	105	197	29	289
653	0.0001736	69	150	13	231
654	0.0002084	52	150	16	248
655	0.0001838	118	188	23	258
656	0.0002019	8	116	21	224
657	0.0002009	4	115	20	226
658	0.0001806	21	118	28	215
659	0.0001901	116	181	18	246
660	0.000173	129	199	21	269
661	0.000178	49	132	14	215
662	0.0001772	76	154	22	232
663	0.0002071	18	132	19	246
664	0.0001824	62	156	16	250
665	0.0001735	97	170	17	243
666	0.0002422	2	119	12	236
667	0.0001842	99	175	22	251
668	0.0001883	42	143	21	244
669	0.0001898	30	133	16	236
670	0.0002002	22	135	18	248
671	0.0001906	10	144	28	278
672	0.0002068	79	164	18	249
673	0.0002206	104	190	25	276
674	0.0001856	157	219	18	281
675	0.0001999	35	148	29	261
676	0.0001846	121	178	17	235
677	0.0001834	65	150	17	235
678	0.0001969	15	128	26	241
679	0.0001754	98	174	18	250
680	0.0001954	83	148	16	213
681	0.0002295	6	119	23	232
682	0.0001821	91	178	20	265
683	0.0001742	66	132	22	198
684	0.0002909	113	168	20	223
685	0.0002125	33	152	21	271
686	0.0002056	104	160	18	216
687	0.0002038	194	239	25	284
688	0.0001831	14	94	18	174
689	0.000196	18	122	16	226
690	0.0002186	108	187	24	266
691	0.0001964	59	137	15	215
692	0.0001862	29	118	15	207
693	0.0001888	32	123	15	214
694	0.0001853	68	146	21	224
695	0.0001912	23	124	12	225
696	0.0001696	119	163	19	207
697	0.000191	33	147	26	261
698	0.0002005	41	146	23	251
699	0.0001732	122	176	18	230
700	0.0001792	124	182	17	240
701	0.0002112	21	146	29	271
702	0.000188	39	131	19	223
703	0.0001856	45	147	15	249
704	0.0001742	107	172	23	237
705	0.0002038	57	156	20	255
706	0.000221	94	170	22	246
707	0.0001787	74	163	19	252
708	0.0002038	38	156	19	274
709	0.000189	10	118	14	226
710	0.000201	119	181	19	243
711	0.0001827	67	150	19	233
712	0.0001755	113	179	23	245
713	0.0001917	57	165	20	273
714	0.0002184	18	137	15	256
715	0.0001823	103	159	15	215
716	0.0001934	41	123	16	205
717	0.0002255	50	131	13	212
718	0.0002026	21	131	18	241
719	0.000188	11	109	13	207
720	0.0002072	48	141	18	234
721	0.0002051	20	125	14	230
722	0.0002172	16	126	14	236
723	0.0002242	12	118	19	224
724	0.0001904	71	161	18	251
725	0.0001967	51	144	19	237
726	0.0001759	68	146	19	224
727	0.0002347	139	214	28	289
728	0.000252	47	140	18	233
729	0.0001702	125	178	21	231
730	0.000182	130	194	29	258
731	0.000191	24	112	18	200
732	0.0001801	95	180	17	265
733	0.0001906	1	139	15	277
734	0.0001913	8	105	16	202
735	0.00019	2	123	14	244
736	0.0001822	93	171	28	249
737	0.0001959	55	151	16	247
738	0.0002184	11	131	18	251
739	0.0001699	126	183	21	240
740	0.0001849	21	125	15	229
741	0.0002053	118	192	19	266
742	0.0001763	111	184	27	257
743	0.0002201	67	162	22	257
744	0.0001856	33	100	15	167
745	0.0001777	21	115	19	209
746	0.000178	101	172	17	243
747	0.0001783	59	142	15	225
748	0.000172	116	183	20	250
749	0.0001716	129	195	15	261
750	0.0001665	80	142	16	204
751	0.0002017	38	130	16	222
752	0.0002266	2	116	16	230
753	0.0001822	63	161	19	259
754	0.0001916	43	136	15	229
755	0.0001956	35	139	17	243
756	0.0002027	40	132	20	224
757	0.0002108	54	137	20	220
758	0.0002052	103	160	16	217
759	0.0001794	104	167	18	230
760	0.0001731	66	133	14	200
761	0.0001959	3	120	14	237
762	0.0001922	49	146	24	243
763	0.0001883	121	203	23	285
764	0.0001746	89	170	28	251
765	0.0001886	43	133	17	223
766	0.0002125	82	169	17	256
767	0.0002503	178	222	16	266
768	0.0001641	234	281	23	328
769	0.0001737	68	137	17	206
770	0.0001957	45	145	15	245
771	0.0001781	91	165	17	239
772	0.0001817	85	174	20	263
773	0.0001689	145	187	14	229
774	0.0002369	37	134	17	231
775	0.0001878	3	114	17	225
776	0.000169	119	168	20	217
777	0.0001857	1	111	12	221
778	0.0001981	33	136	22	239
779	0.0001885	122	183	26	244
780	0.0001826	40	126	12	212
781	0.0002077	23	147	17	271
782	0.000207	51	152	18	253
783	0.0001787	66	156	26	246
784	0.0002055	42	145	25	248
785	0.0001858	47	156	17	265
786	0.0001942	87	177	23	267
787	0.0002121	158	234	29	310
788	0.0001989	78	161	21	244
789	0.000176	146	217	27	288
790	0.0002009	35	145	25	255
791	0.0001773	75	158	18	241
792	0.0002088	10	124	15	238
793	0.0001837	76	163	20	250
794	0.0001721	130	185	20	240
795	0.0001901	42	114	10	186
796	0.0002219	42	158	18	274
797	0.0001945	70	144	18	218
798	0.0002058	33	125	14	217
799	0.0001826	45	156	29	267
800	0.0001994	4	145	26	286
801	0.0001769	91	174	18	257
802	0.0001863	41	131	21	221
803	0.0001838	53	155	28	257
804	0.0001757	111	168	21	225
805	0.0002377	28	126	23	224
806	0.0001957	90	177	17	264
807	0.0001868	25	118	18	211
808	0.0001775	92	165	18	238
809	0.0001793	99	180	24	261
810	0.0001917	35	165	29	295
811	0.0002132	4	126	19	248
812	0.0001934	1	129	14	257
813	0.0001971	53	145	17	237
814	0.0001866	67	148	15	229
815	0.000192	83	169	17	255
816	0.0001835	102	175	18	248
817	0.0001902	21	119	15	217
818	0.0001917	46	128	16	210
819	0.0002121	22	142	28	262
820	0.0001946	95	149	18	203
821	0.0001745	105	173	18	241
822	0.0001813	14	101	12	188
823	0.0002362	135	203	17	271
824	0.0001874	66	170	26	274
825	0.00021	100	160	19	220
826	0.0001863	127	189	25	251
827	0.0001822	63	143	13	223
828	0.0001779	107	160	18	213
829	0.0002087	24	128	13	232
830	0.0001723	58	123	13	188
831	0.0002199	25	141	18	257
832	0.0001692	96	161	17	226
833	0.0002069	19	128	16	237
834	0.0001859	74	154	17	234
835	0.0001858	128	209	23	290
836	0.0001944	24	104	13	184
837	0.0001818	12	113	16	214
838	0.0001868	56	169	29	282
839	0.0001915	3	126	24	249
840	0.0001976	35	122	17	209
841	0.0001827	30	120	15	210
842	0.000189	32	112	14	192
843	0.0001755	85	173	22	261
844	0.0001984	40	147	14	254
845	0.0001895	123	185	17	247
846	0.000185	44	128	17	212
847	0.0001986	2	118	17	234
848	0.0001906	19	119	20	219
849	0.0001834	122	177	19	232
850	0.000194	15	118	14	221
851	0.0001996	22	128	16	234
852	0.0001849	60	170	27	280
853	0.0001752	106	171	27	236
854	0.0002134	35	127	18	219
855	0.0002096	66	141	19	216
856	0.0001812	95	171	24	247
857	0.0002021	100	155	17	210
858	0.0002343	6	128	20	250
859	0.0001827	59	140	14	221
860	0.0001723	106	179	18	252
861	0.0002098	61	160	25	259
862	0.0002173	65	143	20	221
863	0.0002049	62	136	15	210
864	0.000229	85	164	21	243
865	0.0001917	111	161	29	211
866	0.0001888	9	125	16	241
867	0.0001828	55	144	14	233
868	0.0002029	32	146	15	260
869	0.0002148	24	127	22	230
870	0.0001857	5	116	15	227
871	0.0001994	15	125	14	235
872	0.0001879	16	126	17	236
873	0.0001975	30	136	21	242
874	0.0001709	138	188	28	238
875	0.0001819	82	157	16	232
876	0.0001868	101	191	19	281
877	0.0001766	123	211	25	299
878	0.0002023	38	134	19	230
879	0.0001814	60	172	25	284
880	0.0001947	3	129	14	255
881	0.0001936	5	131	20	257
882	0.0001856	64	145	14	226
883	0.0002016	4	136	27	268
884	0.0001949	19	124	14	229
885	0.0001954	47	122	16	197
886	0.0001875	36	136	17	236
887	0.0001884	78	163	19	248
888	0.0001878	9	124	26	239
889	0.0001737	170	223	17	276
890	0.0001912	22	121	21	220
891	0.0001702	144	203	24	262
892	0.0001801	10	114	23	218
893	0.000186	32	147	28	262
894	0.0001892	97	176	23	255
895	0.0002236	161	220	21	279
896	0.0001975	63	160	19	257
897	0.0001751	112	181	26	250
898	0.0002005	0	98	12	196
899	0.0001812	69	168	18	267
900	0.0001742	92	162	28	232
901	0.0001814	66	139	20	212
902	0.0001952	21	142	20	263
903	0.0001764	123	198	28	273
904	0.0001778	51	140	13	229
905	0.0001931	84	154	29	224
906	0.0002144	22	136	14	250
907	0.0001726	78	161	21	244
908	0.0001783	54	134	17	214
909	0.0001861	23	123	22	223
910	0.0001956	190	241	29	292
911	0.00018	82	169	18	256
912	0.0002196	2	132	16	262
913	0.0002031	43	160	16	277
914	0.0001834	54	148	28	242
915	0.0001761	147	199	22	251
916	0.000183	36	132	27	228
917	0.0001959	24	150	19	276
918	0.0001946	42	151	26	260
919	0.0002114	26	152	25	278
920	0.0001865	54	149	16	244
921	0.0001823	74	156	18	238
922	0.000173	113	170	16	227
923	0.0001733	173	213	19	253
924	0.0001858	47	135	22	223
925	0.0001936	19	125	12	231
926	0.0001676	143	196	24	249
927	0.0002037	54	160	22	266
928	0.0001859	37	120	16	203
929	0.0002125	16	157	21	298
930	0.0001924	3	141	20	279
931	0.0001858	129	193	24	257
932	0.0001793	93	165	19	237
933	0.0001845	58	133	15	208
934	0.0001744	66	139	15	212
935	0.0002408	22	133	20	244
936	0.0001987	53	143	19	233
937	0.000178	75	159	25	243
938	0.0001758	71	142	16	213
939	0.0002028	36	143	19	250
940	0.0001658	148	206	22	264
941	0.0001855	20	134	16	248
942	0.0001974	13	120	19	227
943	0.0002137	20	121	16	222
944	0.0002066	159	217	24	275
945	0.0001847	11	112	13	213
946	0.0002211	48	135	22	222
947	0.0002101	14	117	12	220
948	0.0001762	76	154	18	232
949	0.00018	76	149	24	222
950	0.0001805	79	153	14	227
951	0.0001597	161	192	19	223
952	0.0001822	9	102	14	195
953	0.0001751	109	157	21	205
954	0.0001923	82	153	22	224
955	0.0002139	77	185	28	293
956	0.0002174	43	129	17	215
957	0.000171	87	151	28	215
958	0.0001812	62	130	17	198
959	0.0002299	37	148	22	259
960	0.0001716	90	160	14	230
961	0.0002084	22	125	16	228
962	0.0001976	53	151	17	249
963	0.0001996	155	212	27	269
964	0.0002072	83	144	16	205
965	0.0001721	149	208	19	267
966	0.0002312	33	127	16	221
967	0.0001859	62	153	21	244
968	0.0001999	52	138	29	224
969	0.0001837	12	119	24	226
970	0.0001773	84	174	23	264
971	0.0001856	38	148	26	258
972	0.0001854	77	175	21	273
973	0.000193	22	132	13	242
974	0.0001875	32	131	28	230
975	0.0001788	118	197	19	276
976	0.0001844	112	173	19	234
977	0.0001827	63	155	22	247
978	0.0001841	17	131	19	245
979	0.0001757	91	182	16	273
980	0.0002076	30	123	13	216
981	0.000169	128	199	16	270
982	0.0001969	27	125	16	223
983	0.0001963	29	120	12	211
984	0.0001811	79	153	24	227
985	0.0001823	62	174	18	286
986	0.0001945	21	124	17	227
987	0.000179	82	163	19	244
988	0.0002279	10	143	26	276
989	0.0002114	82	163	16	244
990	0.0001911	19	128	16	237
991	0.0002964	2	119	19	236
992	0.0001657	235	272	28	309
993	0.0002179	36	158	25	280
994	0.0001926	11	119	24	227
995	0.0001842	2	97	15	192
996	0.0001677	156	210	18	264
997	0.0001774	120	183	18	246
998	0.0001942	41	152	18	263
999	0.0001893	91	150	13	209
mean	0.000193364	62.826	151.516	19.44	240.206

## Sheet: GS_Opt
	time	SEq	Bal	Reg	Egal
0	0.0003983	6	132	20	245
1	0.0004543	121	196	24	271
2	0.0003945	7	111	14	215
3	0.000448	21	123	16	225
4	0.0003954	6	124	20	242
5	0.0004001	7	101	13	195
6	0.0003834	46	130	15	214
7	0.0004033	23	131	17	220
8	0.0003831	35	138	27	241
9	0.000401	4	118	16	232
10	0.0004116	2	108	16	214
11	0.0003687	1	114	21	227
12	0.0003768	32	109	17	186
13	0.0003909	47	153	19	259
14	0.0003817	79	159	19	239
15	0.0003715	68	154	17	240
16	0.0003932	10	117	19	224
17	0.0003861	43	156	14	267
18	0.0003697	26	129	14	232
19	0.0003863	15	121	14	225
20	0.0003898	20	134	15	245
21	0.0004272	62	160	18	258
22	0.0004222	12	139	23	229
23	0.0003911	5	104	18	203
24	0.0004004	33	127	17	221
25	0.0003534	54	136	15	218
26	0.0004105	52	130	14	208
27	0.0003644	42	133	14	224
28	0.0003916	3	116	16	229
29	0.0003554	70	158	14	219
30	0.0004546	35	131	18	227
31	0.0004157	42	142	20	242
32	0.0003557	57	134	17	211
33	0.0003723	38	154	17	270
34	0.0003844	22	150	28	278
35	0.000362	1	119	16	213
36	0.0003579	39	123	21	203
37	0.0003765	34	139	15	244
38	0.00054	59	147	16	235
39	0.0004249	49	146	13	243
40	0.0004068	24	150	27	276
41	0.0004218	67	147	18	227
42	0.00057	58	152	28	246
43	0.0003583	28	121	16	214
44	0.0003727	14	113	16	212
45	0.0004072	62	163	21	264
46	0.0003835	37	157	17	265
47	0.0003588	31	122	18	213
48	0.0003731	41	152	13	263
49	0.0003946	24	137	17	250
50	0.000371	39	145	15	251
51	0.0003958	27	165	28	303
52	0.0003729	2	112	20	222
53	0.0003981	76	164	18	252
54	0.0004151	60	147	17	234
55	0.0003834	12	129	26	246
56	0.000362	91	170	20	240
57	0.0003769	30	113	18	196
58	0.0004163	39	130	20	221
59	0.0004274	152	199	18	246
60	0.0003577	44	141	18	238
61	0.0003828	51	137	26	223
62	0.0003914	93	175	18	257
63	0.0003773	48	140	23	232
64	0.0004759	24	149	26	274
65	0.0003757	14	132	18	250
66	0.0003668	48	118	17	188
67	0.0003663	8	117	20	226
68	0.0004181	22	130	15	238
69	0.0003597	72	162	12	252
70	0.0003647	39	129	21	219
71	0.000338	69	133	17	197
72	0.00036	7	121	18	235
73	0.0004014	6	117	11	228
74	0.0003629	56	168	22	267
75	0.0004013	45	132	13	219
76	0.000394	14	136	16	258
77	0.00036	67	138	16	209
78	0.0004092	11	137	23	253
79	0.0003735	48	131	16	207
80	0.0004714	11	118	16	225
81	0.0003948	123	192	19	248
82	0.0004525	12	163	27	314
83	0.0004073	15	117	14	219
84	0.0003996	60	143	27	226
85	0.0003515	9	102	14	195
86	0.0003696	92	161	20	230
87	0.0003504	30	126	15	222
88	0.0003927	38	136	17	234
89	0.0004108	47	123	19	199
90	0.0003929	67	160	19	253
91	0.0003865	31	138	28	245
92	0.0003962	72	166	23	260
93	0.0003747	1	120	14	228
94	0.0003702	43	132	19	217
95	0.0003885	36	136	16	236
96	0.0003556	27	122	24	217
97	0.0003822	1	135	16	263
98	0.0004083	71	160	18	245
99	0.000361	35	121	14	201
100	0.0004155	37	142	26	247
101	0.0004111	20	149	26	278
102	0.0004009	29	127	28	225
103	0.000373	33	128	16	208
104	0.0004074	12	112	16	212
105	0.0003674	3	117	12	231
106	0.0003791	13	131	17	249
107	0.0004606	22	153	27	284
108	0.0003924	74	152	16	230
109	0.0003537	36	136	18	236
110	0.0004034	35	120	13	205
111	0.0003931	7	112	13	214
112	0.0003658	24	134	19	244
113	0.0003596	64	133	17	196
114	0.000406	8	96	19	184
115	0.000376	18	122	23	226
116	0.0003769	14	155	16	278
117	0.0003919	7	126	24	245
118	0.0004367	41	131	15	218
119	0.0003796	67	167	25	266
120	0.0003594	15	136	23	257
121	0.0004141	24	125	16	224
122	0.0003482	50	132	19	214
123	0.0003784	15	98	13	181
124	0.0004054	19	101	17	183
125	0.0004112	8	120	15	232
126	0.0003499	61	133	16	205
127	0.0003433	32	116	22	200
128	0.0004114	19	140	16	252
129	0.0003991	23	152	20	281
130	0.0004238	65	153	13	241
131	0.0003582	45	130	18	215
132	0.0003829	9	115	16	207
133	0.0004423	17	128	20	233
134	0.0003883	9	114	27	219
135	0.0004045	33	135	14	237
136	0.0004082	11	122	15	233
137	0.0003978	7	129	14	251
138	0.0003745	74	149	20	224
139	0.0004278	57	154	18	251
140	0.0004074	27	141	29	255
141	0.0003917	43	154	29	265
142	0.0003629	43	144	19	237
143	0.0003656	64	160	18	256
144	0.0003666	2	105	15	194
145	0.0003715	6	130	16	240
146	0.0003761	82	148	18	214
147	0.0003623	38	118	15	198
148	0.0003497	45	138	20	231
149	0.0003921	49	148	16	244
150	0.0004275	38	126	17	214
151	0.0003699	27	115	19	203
152	0.0003749	61	140	15	215
153	0.0003586	21	116	12	202
154	0.0004061	15	135	16	248
155	0.0003991	44	142	17	240
156	0.0003913	8	113	15	213
157	0.0003984	64	165	16	244
158	0.0004052	27	135	26	243
159	0.0003646	80	164	18	248
160	0.0003509	31	128	18	225
161	0.0003812	27	116	13	192
162	0.0003689	25	132	14	225
163	0.0003687	33	151	25	269
164	0.0003548	2	95	19	188
165	0.0003785	23	118	22	213
166	0.0003845	19	142	17	265
167	0.0004362	40	107	13	174
168	0.0003954	32	160	26	288
169	0.0004184	4	123	13	242
170	0.0004065	13	123	18	233
171	0.0003836	112	180	20	248
172	0.000387	14	128	21	242
173	0.0004157	108	187	19	266
174	0.0003449	125	198	19	265
175	0.0003776	21	122	15	223
176	0.0003509	50	127	17	204
177	0.0003467	81	169	18	246
178	0.0003774	3	121	25	239
179	0.0003849	158	210	19	262
180	0.0003667	20	146	23	272
181	0.0003715	62	158	15	254
182	0.0003677	18	110	12	202
183	0.0003781	4	118	16	232
184	0.0003639	54	134	17	214
185	0.000387	17	130	18	243
186	0.000363	65	143	16	221
187	0.0003928	0	110	14	220
188	0.0003709	33	135	16	237
189	0.0003756	24	126	18	222
190	0.0003552	51	140	19	229
191	0.0003929	82	162	15	240
192	0.0003669	106	173	14	240
193	0.0003988	43	152	24	261
194	0.0003552	42	134	12	226
195	0.0003755	22	124	19	226
196	0.000379	45	143	24	241
197	0.0004339	54	142	20	230
198	0.000392	15	120	22	224
199	0.0003932	28	140	22	252
200	0.0003905	31	113	12	195
201	0.0003605	15	120	17	216
202	0.0004011	54	175	28	296
203	0.0003812	30	144	18	258
204	0.0003575	92	174	23	240
205	0.0003584	66	149	18	229
206	0.0003592	52	136	13	220
207	0.0003929	36	144	17	250
208	0.0005182	40	124	12	208
209	0.0003625	35	119	13	203
210	0.0003659	23	112	18	201
211	0.0003711	53	150	15	247
212	0.0003778	32	140	17	246
213	0.000342	65	135	20	205
214	0.0003483	72	167	22	262
215	0.0003854	46	131	16	216
216	0.0003776	8	127	18	240
217	0.0003907	121	180	21	239
218	0.0004076	36	122	15	208
219	0.0003747	30	136	15	242
220	0.0003873	67	147	23	227
221	0.0003884	17	129	16	241
222	0.0003676	9	118	21	222
223	0.0004204	9	137	16	265
224	0.0003754	26	141	16	256
225	0.0004035	94	168	21	242
226	0.0003569	118	189	18	260
227	0.0003698	39	122	17	205
228	0.0003642	38	131	18	224
229	0.0003654	34	139	19	244
230	0.0003993	21	130	13	223
231	0.0003846	15	133	14	234
232	0.0003889	18	163	25	301
233	0.0004026	137	205	26	273
234	0.0003928	17	126	15	235
235	0.0003955	40	138	16	236
236	0.0004565	41	119	16	197
237	0.0003744	12	118	13	224
238	0.0003873	59	133	17	201
239	0.0004015	12	113	20	214
240	0.0003794	4	139	27	274
241	0.0003707	16	122	16	228
242	0.0003884	3	100	15	197
243	0.0003582	71	164	15	247
244	0.0003945	7	133	15	259
245	0.0003618	148	207	20	264
246	0.0003674	32	133	13	224
247	0.0004125	61	151	18	241
248	0.0003836	2	126	16	245
249	0.0003998	10	122	18	225
250	0.0003742	33	131	19	229
251	0.0003656	39	130	16	221
252	0.0003619	18	123	15	200
253	0.0003541	85	159	19	233
254	0.000402	24	141	14	258
255	0.000391	48	146	28	244
256	0.0004407	24	127	29	230
257	0.0003964	39	147	23	255
258	0.0003603	36	117	18	198
259	0.0003664	15	115	16	215
260	0.0004336	43	142	16	241
261	0.0003713	56	141	16	226
262	0.0003599	52	137	13	211
263	0.0004017	47	141	19	235
264	0.0003901	61	140	14	219
265	0.0004065	35	151	24	267
266	0.0003804	34	123	18	212
267	0.000401	21	119	19	217
268	0.0003744	21	139	15	257
269	0.0004159	55	158	13	261
270	0.0003877	20	133	12	245
271	0.0003679	64	152	17	240
272	0.0004109	60	143	27	226
273	0.0003485	62	147	17	232
274	0.0003626	77	148	14	219
275	0.000404	43	145	28	247
276	0.0003678	29	135	15	236
277	0.0003627	46	126	13	200
278	0.0003696	23	136	17	241
279	0.0003673	9	134	26	252
280	0.0003803	33	149	22	259
281	0.0004079	24	139	25	254
282	0.0003701	20	118	22	216
283	0.0004159	42	127	13	210
284	0.000355	2	104	12	193
285	0.0003755	48	140	13	226
286	0.0004029	25	136	14	247
287	0.0003636	23	117	17	211
288	0.0004152	78	167	17	256
289	0.0003678	12	112	14	211
290	0.0003808	36	135	14	234
291	0.0004661	113	173	16	233
292	0.0003875	14	104	14	194
293	0.0003912	52	149	18	246
294	0.0004101	1	113	15	225
295	0.0004091	13	133	16	240
296	0.0003935	51	113	13	175
297	0.0003818	5	138	29	271
298	0.0003559	30	144	14	258
299	0.0004043	5	145	22	285
300	0.0003888	15	119	13	223
301	0.0003603	44	131	14	218
302	0.0003606	21	102	20	181
303	0.0003738	37	123	14	209
304	0.0003769	68	136	16	204
305	0.0003797	16	126	24	236
306	0.0004051	125	203	18	281
307	0.000571	36	156	28	276
308	0.0003637	49	129	12	209
309	0.0003859	60	161	22	262
310	0.0004122	86	162	18	238
311	0.000366	36	123	12	210
312	0.0003981	14	111	16	208
313	0.0003898	18	126	14	234
314	0.0003832	49	157	21	265
315	0.0003735	12	111	26	210
316	0.0003675	33	119	14	205
317	0.000423	28	132	29	229
318	0.0003433	117	175	27	233
319	0.0003612	49	147	20	234
320	0.0003788	33	124	15	215
321	0.0003537	90	162	14	234
322	0.0004007	57	146	19	235
323	0.0003784	2	120	16	234
324	0.0003696	25	133	15	241
325	0.0004197	115	185	21	255
326	0.0003868	108	175	20	242
327	0.000403	82	158	20	234
328	0.0004043	32	124	15	216
329	0.0003518	49	116	17	183
330	0.0003419	82	141	14	200
331	0.0003705	68	154	16	240
332	0.0003761	34	138	17	242
333	0.000376	138	204	21	261
334	0.0004011	98	177	22	256
335	0.000383	81	177	15	247
336	0.0003701	17	149	21	276
337	0.0003747	42	126	11	210
338	0.0004367	20	129	25	238
339	0.0003838	47	149	15	251
340	0.0003759	0	109	18	218
341	0.0003703	19	131	18	243
342	0.0003432	94	159	17	211
343	0.0003559	73	143	19	213
344	0.0004959	19	114	16	209
345	0.0003927	25	146	19	261
346	0.000369	9	132	23	255
347	0.0003806	6	121	18	236
348	0.000369	30	131	16	232
349	0.0003616	8	97	15	186
350	0.0004001	47	148	26	249
351	0.0003926	15	108	16	195
352	0.000413	7	123	23	239
353	0.0003679	41	137	12	215
354	0.0003713	21	130	15	239
355	0.0003589	36	127	15	218
356	0.0003926	9	128	18	247
357	0.0003657	61	159	19	257
358	0.0003762	43	129	21	215
359	0.0004859	48	139	23	230
360	0.0003758	12	127	27	239
361	0.0003687	54	147	19	207
362	0.0003784	21	134	17	247
363	0.0004396	22	127	17	232
364	0.0004002	24	138	22	252
365	0.0003606	120	194	28	251
366	0.0003651	20	126	14	227
367	0.0004183	1	116	19	231
368	0.0003481	133	194	19	255
369	0.0003568	3	110	15	217
370	0.0003892	58	143	16	207
371	0.0004063	16	109	15	190
372	0.0004717	6	106	15	206
373	0.0003867	52	143	14	221
374	0.0003902	20	134	19	248
375	0.0003735	36	125	15	214
376	0.0003691	69	130	17	191
377	0.0003519	46	131	15	216
378	0.0003535	91	158	18	225
379	0.0003784	22	135	16	248
380	0.0003571	2	114	18	226
381	0.0003967	9	122	16	235
382	0.0003751	41	122	14	203
383	0.000401	65	153	15	240
384	0.000376	17	147	18	277
385	0.0003528	81	155	21	229
386	0.0004032	16	126	22	236
387	0.0003908	41	133	22	221
388	0.0003744	68	146	18	224
389	0.0004003	30	136	26	236
390	0.000351	60	160	24	260
391	0.0004273	114	185	20	256
392	0.0003891	22	136	17	246
393	0.000373	49	147	13	229
394	0.000364	101	162	20	223
395	0.0004008	55	145	23	235
396	0.0004032	76	143	15	210
397	0.0004144	45	130	24	215
398	0.0004324	51	122	14	193
399	0.0003992	25	119	29	213
400	0.0003659	16	109	16	202
401	0.0003894	2	122	28	242
402	0.0003959	21	130	16	239
403	0.0003879	25	115	16	205
404	0.000367	40	137	21	234
405	0.0003978	31	141	29	251
406	0.0003717	40	124	17	208
407	0.0004118	57	167	26	277
408	0.0003744	74	141	20	208
409	0.000369	54	151	13	248
410	0.0003455	79	164	18	234
411	0.0003931	63	140	16	209
412	0.0004129	13	118	13	223
413	0.0003865	77	158	24	235
414	0.0003614	12	117	16	222
415	0.000396	19	116	19	213
416	0.0003843	4	133	20	251
417	0.0003622	5	113	13	221
418	0.0003765	15	129	12	243
419	0.0004362	21	122	14	223
420	0.0003878	26	134	15	242
421	0.0003892	4	115	14	226
422	0.0003695	48	149	14	222
423	0.0003749	17	129	16	234
424	0.0003488	81	177	20	236
425	0.0004069	53	145	14	237
426	0.0003762	52	169	19	264
427	0.0003994	66	160	25	254
428	0.0003851	12	125	14	214
429	0.0003913	94	172	18	250
430	0.0004647	79	150	15	221
431	0.000374	45	153	17	244
432	0.0003825	61	131	13	201
433	0.000378	41	126	17	211
434	0.0004117	49	136	19	223
435	0.0003618	96	160	18	224
436	0.0003742	20	124	16	224
437	0.0003875	61	147	20	233
438	0.0003862	81	150	15	219
439	0.000391	38	139	18	240
440	0.0004497	14	119	14	224
441	0.0003924	55	137	13	219
442	0.0003744	72	147	15	222
443	0.0003782	6	112	16	218
444	0.0004201	37	126	17	215
445	0.0004129	105	168	16	231
446	0.0003859	8	108	12	207
447	0.0003939	10	129	29	246
448	0.0004077	3	109	15	215
449	0.0003799	2	110	20	218
450	0.0003649	28	121	17	214
451	0.0003606	11	107	18	203
452	0.0003717	45	140	20	235
453	0.0003605	131	193	16	255
454	0.0004421	92	186	15	268
455	0.0003638	31	133	17	235
456	0.0003737	6	115	18	224
457	0.0003952	111	183	19	255
458	0.0003778	33	119	21	205
459	0.0003701	5	104	12	203
460	0.0004347	2	120	14	238
461	0.0004163	8	124	20	240
462	0.0004072	25	131	26	237
463	0.0003834	7	123	16	239
464	0.000397	4	130	18	241
465	0.0004124	22	132	18	236
466	0.0003671	3	111	19	219
467	0.000387	7	109	17	211
468	0.0003698	28	124	15	217
469	0.0004041	36	115	13	194
470	0.0004155	42	145	19	248
471	0.0003925	63	162	20	250
472	0.0004259	4	126	15	248
473	0.0003881	48	161	16	274
474	0.000341	98	164	22	230
475	0.0003442	77	135	12	193
476	0.0004341	55	151	13	247
477	0.0003426	77	147	16	217
478	0.0004115	4	118	23	232
479	0.0003858	5	121	16	237
480	0.0003643	18	128	13	238
481	0.0003466	107	162	20	217
482	0.0003765	68	145	16	222
483	0.0003317	80	162	19	244
484	0.0003966	59	140	18	220
485	0.0003635	55	141	14	227
486	0.0003763	19	118	14	217
487	0.000382	45	142	22	239
488	0.0003923	19	157	29	295
489	0.0003868	44	161	18	275
490	0.0004095	2	101	13	200
491	0.0004092	1	138	17	263
492	0.0004292	35	135	20	235
493	0.0003829	7	131	16	255
494	0.0004559	69	146	15	223
495	0.0003715	11	109	17	207
496	0.0003884	56	154	17	252
497	0.0003589	1	111	17	221
498	0.0003701	27	131	18	228
499	0.0003603	40	111	15	182
500	0.0003643	31	124	13	217
501	0.0003588	53	123	19	193
502	0.0004099	21	106	19	191
503	0.0004028	14	139	19	255
504	0.0003553	23	105	15	187
505	0.0003784	34	135	16	236
506	0.0003719	38	144	17	250
507	0.0003664	32	135	12	238
508	0.0003794	24	135	19	246
509	0.0003621	31	126	15	219
510	0.0003801	39	122	11	205
511	0.0003726	48	139	19	230
512	0.0003822	35	135	15	219
513	0.0003789	6	130	19	254
514	0.000383	37	122	17	207
515	0.0003841	45	127	21	209
516	0.0003688	11	108	16	202
517	0.0003899	122	210	20	266
518	0.0003595	114	170	22	226
519	0.0003773	20	128	20	236
520	0.0003567	17	127	17	220
521	0.0003674	43	120	13	197
522	0.0003757	13	122	14	231
523	0.0004432	10	116	16	222
524	0.0003623	18	125	13	228
525	0.0004076	14	119	15	224
526	0.0003701	53	131	13	209
527	0.0003846	13	112	19	211
528	0.0003786	11	141	25	271
529	0.0003636	9	127	16	245
530	0.0003861	8	114	20	218
531	0.0003889	0	124	17	248
532	0.0003961	51	158	27	261
533	0.0003442	120	173	18	224
534	0.0004251	2	126	16	250
535	0.0004272	7	121	16	235
536	0.00037	32	121	15	210
537	0.0003495	109	180	18	242
538	0.000394	54	166	28	278
539	0.0004043	18	139	20	260
540	0.0003834	21	123	22	225
541	0.0003674	64	189	19	284
542	0.0003803	25	132	14	239
543	0.000363	29	126	18	203
544	0.0003828	37	140	18	243
545	0.0003797	3	126	27	249
546	0.0003828	61	148	15	229
547	0.0003575	93	166	19	231
548	0.0003764	21	119	18	217
549	0.0003367	95	167	19	234
550	0.0003909	15	125	16	235
551	0.0003742	93	177	24	261
552	0.0003974	11	122	17	218
553	0.000374	12	102	15	192
554	0.0004623	13	138	16	250
555	0.0003739	32	124	24	214
556	0.0004067	42	141	14	231
557	0.000398	25	117	14	209
558	0.0003922	33	157	16	281
559	0.0003385	106	165	19	224
560	0.0004308	12	138	18	264
561	0.0003483	32	117	18	202
562	0.0003708	121	204	23	280
563	0.0003551	16	102	13	188
564	0.000372	31	134	18	237
565	0.0003779	7	109	15	211
566	0.0003768	6	118	16	230
567	0.0003512	64	137	16	204
568	0.0003957	23	135	25	247
569	0.0003697	62	145	14	228
570	0.0003724	56	156	23	253
571	0.0003954	50	157	17	264
572	0.00041	92	177	15	262
573	0.0003843	82	176	27	270
574	0.0003867	75	144	14	213
575	0.0003765	22	135	28	244
576	0.0004149	74	155	18	236
577	0.0004083	31	120	19	209
578	0.000385	3	128	16	253
579	0.0003875	48	154	25	260
580	0.000374	7	123	26	231
581	0.0003782	58	150	21	242
582	0.0003858	42	139	23	236
583	0.0003446	89	153	19	205
584	0.0003679	42	158	21	274
585	0.0004017	13	116	16	219
586	0.0004157	78	162	22	246
587	0.000379	61	155	15	249
588	0.0003764	1	142	28	280
589	0.0003739	24	106	14	188
590	0.0003852	65	169	17	261
591	0.0003969	87	165	15	243
592	0.000397	56	154	19	252
593	0.0003627	45	133	18	219
594	0.0003544	63	148	19	231
595	0.0003575	20	133	19	246
596	0.0003744	60	135	17	210
597	0.0003904	56	149	16	230
598	0.0003513	70	139	16	208
599	0.0003671	3	118	18	233
600	0.0003639	23	116	16	209
601	0.0003877	38	136	13	234
602	0.0003742	16	140	29	257
603	0.0003863	64	155	17	234
604	0.0003447	146	195	19	244
605	0.0003687	3	113	17	223
606	0.0003718	44	131	22	216
607	0.0003552	72	173	19	269
608	0.0003575	15	102	15	189
609	0.0003684	35	141	17	247
610	0.0004255	79	160	14	241
611	0.0003911	12	144	24	276
612	0.0003874	71	166	23	261
613	0.0003757	35	120	14	205
614	0.000394	17	153	27	289
615	0.0003769	25	121	14	217
616	0.0003893	113	161	16	209
617	0.0003576	45	130	17	215
618	0.0003699	19	128	25	234
619	0.000343	107	176	19	245
620	0.0003945	16	142	19	268
621	0.0003924	1	120	20	239
622	0.0003676	73	137	17	201
623	0.0005273	18	123	15	228
624	0.0003888	18	129	17	240
625	0.0003856	65	147	14	229
626	0.0003658	40	135	15	230
627	0.0003977	20	130	14	240
628	0.0004104	56	152	15	239
629	0.0003635	17	137	15	235
630	0.0003568	93	169	22	245
631	0.0003744	42	119	15	196
632	0.0004155	48	131	24	214
633	0.0003671	142	197	20	252
634	0.0003872	1	99	14	197
635	0.0004104	107	185	19	250
636	0.0003715	18	147	26	276
637	0.0003969	73	168	17	263
638	0.0003685	29	136	19	216
639	0.0003947	4	126	24	248
640	0.0003864	4	105	12	206
641	0.000387	2	127	15	252
642	0.0003846	10	140	23	270
643	0.0003826	23	136	15	249
644	0.000366	4	99	15	194
645	0.0003712	64	154	16	237
646	0.0003534	75	149	17	223
647	0.0003597	65	152	25	239
648	0.0004321	11	112	17	213
649	0.0003749	25	122	21	217
650	0.000389	6	114	15	222
651	0.0003943	17	130	14	234
652	0.0003937	81	177	29	273
653	0.0003525	11	110	11	209
654	0.0004025	52	150	16	248
655	0.000377	54	145	23	236
656	0.0003871	8	116	21	224
657	0.0004087	4	115	20	226
658	0.0003908	21	118	13	201
659	0.0003686	47	140	17	233
660	0.0003623	2	119	14	236
661	0.000365	6	107	14	208
662	0.0004338	27	136	22	232
663	0.0003936	18	132	19	246
664	0.0003762	56	156	16	250
665	0.0003401	97	170	17	243
666	0.0004325	2	119	12	229
667	0.0003795	99	175	22	251
668	0.0003742	42	140	16	225
669	0.0003764	4	124	16	236
670	0.0003979	22	135	18	248
671	0.0003825	10	144	28	278
672	0.0003899	79	164	17	249
673	0.0003983	104	190	25	276
674	0.0003891	15	130	16	245
675	0.000386	35	148	29	261
676	0.0003907	110	172	17	234
677	0.0003658	65	150	17	235
678	0.0003682	15	128	26	241
679	0.0003724	58	144	18	230
680	0.0003927	71	139	16	207
681	0.0004206	6	119	23	232
682	0.0003663	53	150	14	247
683	0.0003461	66	132	22	198
684	0.0004839	72	154	20	223
685	0.0004259	29	152	21	271
686	0.0004743	104	160	18	216
687	0.0003933	74	170	19	266
688	0.0003604	14	94	18	174
689	0.0003794	18	122	16	226
690	0.0004031	108	187	24	266
691	0.0003727	59	137	15	215
692	0.0003595	29	118	15	207
693	0.0003767	27	123	14	214
694	0.0003715	15	109	13	203
695	0.0003684	23	124	12	225
696	0.000352	24	132	19	207
697	0.0003955	12	131	26	250
698	0.0004023	41	146	23	251
699	0.00036	25	132	17	230
700	0.0003643	2	107	11	212
701	0.000397	21	146	29	271
702	0.0003781	39	131	19	223
703	0.0003852	45	147	15	249
704	0.0003733	41	137	15	233
705	0.0003849	57	156	20	255
706	0.0004226	38	134	15	230
707	0.0003888	43	154	19	252
708	0.0003975	38	156	19	274
709	0.0003723	10	118	14	223
710	0.0004423	67	143	14	219
711	0.0004003	15	122	15	229
712	0.0003534	109	179	23	245
713	0.0003703	57	149	20	230
714	0.0004168	18	137	15	256
715	0.0003596	48	138	15	215
716	0.0003678	41	123	16	205
717	0.0004073	50	131	13	212
718	0.0003883	21	131	18	241
719	0.0003776	11	109	13	207
720	0.0004442	48	134	16	204
721	0.0004087	20	125	14	230
722	0.0003963	16	126	13	227
723	0.0004015	12	118	19	224
724	0.0003745	71	161	17	249
725	0.0003798	51	144	19	237
726	0.0003551	56	139	19	222
727	0.0004319	29	152	25	275
728	0.000449	1	123	18	233
729	0.0003629	54	142	15	230
730	0.000369	91	164	19	237
731	0.0003823	24	112	18	198
732	0.0003721	6	129	15	252
733	0.000372	1	139	15	277
734	0.0003703	8	105	16	199
735	0.0003823	2	123	14	244
736	0.0003837	32	146	28	249
737	0.0003637	55	151	16	247
738	0.0004095	8	129	18	250
739	0.0003735	74	152	19	230
740	0.0003876	21	125	15	229
741	0.0003905	18	125	19	232
742	0.0003747	38	136	18	234
743	0.0004043	67	162	22	257
744	0.0003997	33	100	15	167
745	0.0003764	21	115	19	209
746	0.0003787	69	168	17	243
747	0.0003719	11	124	15	225
748	0.0003626	60	156	18	250
749	0.0003884	49	151	15	253
750	0.0003374	80	142	16	204
751	0.0003823	33	130	14	222
752	0.0004256	2	116	16	230
753	0.0003632	63	161	16	251
754	0.0003873	43	136	15	229
755	0.0004044	35	139	17	243
756	0.0003986	40	132	20	224
757	0.0003969	54	137	20	220
758	0.0003752	103	160	16	217
759	0.000358	89	159	14	229
760	0.000349	66	133	14	200
761	0.0003863	3	120	14	237
762	0.0003849	4	125	24	243
763	0.0003805	29	150	16	271
764	0.0003547	18	130	27	242
765	0.0003927	30	133	17	223
766	0.0003988	64	168	15	256
767	0.0005027	55	148	16	241
768	0.0003487	52	143	15	234
769	0.0003582	30	125	17	206
770	0.0004266	44	143	15	242
771	0.000364	42	152	17	239
772	0.0003747	29	128	16	227
773	0.0003317	145	187	14	229
774	0.0004148	37	134	17	222
775	0.0003757	3	114	17	211
776	0.0003805	34	114	17	194
777	0.000361	1	111	12	221
778	0.0003901	33	136	22	239
779	0.000366	85	174	21	244
780	0.0003766	40	126	12	212
781	0.0004056	0	137	17	271
782	0.0003787	51	152	18	253
783	0.0003866	66	153	25	231
784	0.000384	42	145	25	248
785	0.0003712	5	133	17	261
786	0.0003846	3	121	14	239
787	0.0004537	114	201	29	288
788	0.0003727	78	161	21	244
789	0.0003802	26	129	13	232
790	0.000394	35	145	25	255
791	0.000363	75	158	18	241
792	0.0003913	10	122	15	227
793	0.0003674	17	123	18	229
794	0.0003534	44	134	17	224
795	0.0003743	37	114	10	186
796	0.0004207	32	150	18	268
797	0.0003785	2	109	14	216
798	0.0004402	33	125	14	217
799	0.0003851	45	156	29	267
800	0.0003879	4	145	26	276
801	0.0003999	33	144	14	255
802	0.0003577	41	131	19	221
803	0.000358	53	155	18	239
804	0.0003949	92	154	21	216
805	0.0004229	28	126	23	224
806	0.0003838	11	138	15	264
807	0.0003772	21	112	13	203
808	0.0003643	23	130	16	237
809	0.0003796	39	140	13	241
810	0.0004597	35	165	29	295
811	0.0004113	4	126	19	248
812	0.0003888	1	129	14	257
813	0.000387	53	145	17	237
814	0.0003765	7	116	13	225
815	0.000403	83	169	17	255
816	0.0004574	93	174	18	248
817	0.000411	21	119	15	217
818	0.0003695	46	128	16	210
819	0.0004013	22	142	28	262
820	0.0003734	31	117	17	203
821	0.0003503	46	131	17	216
822	0.0003679	14	101	12	188
823	0.0004197	135	203	17	271
824	0.0004112	66	170	26	274
825	0.0003816	100	160	14	220
826	0.0003685	108	176	21	244
827	0.0003694	12	107	13	202
828	0.0003807	9	122	18	213
829	0.0003944	24	128	13	228
830	0.0003469	38	120	13	188
831	0.0004222	25	141	18	257
832	0.0003574	21	130	17	226
833	0.0003865	19	128	16	236
834	0.0003586	74	154	17	234
835	0.000367	128	209	23	290
836	0.0003654	24	104	13	184
837	0.000385	12	113	16	214
838	0.0003699	56	162	28	259
839	0.0003914	3	126	24	242
840	0.000368	35	122	17	209
841	0.0003731	1	103	15	205
842	0.0003909	32	112	14	192
843	0.0003527	66	143	15	220
844	0.0003789	40	147	14	254
845	0.0004399	102	178	16	247
846	0.0003945	44	128	17	212
847	0.0003793	2	118	17	226
848	0.0003732	19	119	16	219
849	0.0003695	5	111	14	217
850	0.0004033	1	114	14	221
851	0.0003674	22	128	16	234
852	0.0003873	60	170	27	280
853	0.0003696	9	117	15	225
854	0.0003867	35	127	18	215
855	0.0004127	66	141	18	216
856	0.0003723	95	171	21	247
857	0.0004235	90	155	17	210
858	0.0004311	6	128	20	250
859	0.0003621	59	140	14	221
860	0.0003617	18	125	18	232
861	0.0004082	61	160	25	259
862	0.0003881	65	143	20	221
863	0.0003911	62	136	15	210
864	0.0004255	53	145	21	237
865	0.0003732	10	111	18	211
866	0.0003782	9	125	14	234
867	0.0003748	55	144	14	233
868	0.0003918	32	146	15	260
869	0.0003831	24	127	20	229
870	0.0003761	5	116	15	227
871	0.0004022	15	125	14	235
872	0.0003977	16	126	17	236
873	0.0003806	30	136	15	242
874	0.0003602	15	117	13	219
875	0.0003622	57	141	15	225
876	0.0003688	101	191	19	281
877	0.0003909	34	148	25	262
878	0.0003812	38	134	14	230
879	0.0003817	60	172	24	274
880	0.0003859	3	129	14	253
881	0.0003811	5	131	20	257
882	0.0003759	11	123	14	226
883	0.0003925	4	136	27	268
884	0.0003756	19	124	14	229
885	0.0003709	47	122	16	197
886	0.0004181	36	136	17	229
887	0.0003745	3	118	18	233
888	0.0003653	9	124	26	232
889	0.0003632	65	170	17	275
890	0.0003762	22	121	21	220
891	0.0003879	87	170	23	253
892	0.0003595	10	114	23	218
893	0.0003924	32	147	28	262
894	0.0003862	83	165	23	247
895	0.0004074	57	157	15	257
896	0.0004155	63	160	19	257
897	0.0003633	19	121	18	223
898	0.0003874	0	98	12	196
899	0.0003686	63	156	18	249
900	0.0003712	3	112	14	221
901	0.0003583	41	123	14	205
902	0.0003767	21	142	20	250
903	0.0003713	59	156	15	253
904	0.0003598	51	139	13	226
905	0.0003576	84	154	21	224
906	0.0004045	22	136	14	250
907	0.0003529	51	139	17	227
908	0.0003498	54	134	17	214
909	0.0003958	23	123	22	223
910	0.0004353	30	129	12	228
911	0.0003588	82	169	18	256
912	0.0004171	2	132	16	262
913	0.0003877	43	160	16	274
914	0.0003604	54	148	22	242
915	0.0003799	58	152	22	246
916	0.0003863	24	119	16	214
917	0.0003954	5	145	19	276
918	0.0003823	38	149	26	260
919	0.0003967	26	152	25	278
920	0.0003739	43	140	14	237
921	0.0003675	24	124	18	224
922	0.0003767	105	170	16	227
923	0.0003572	29	121	19	213
924	0.0004045	36	132	16	223
925	0.0004308	19	125	12	231
926	0.0003793	71	152	23	233
927	0.0003883	54	160	22	266
928	0.0003504	37	120	16	203
929	0.0004081	16	157	21	298
930	0.0004128	3	141	20	265
931	0.000378	17	127	15	237
932	0.0003603	88	154	18	220
933	0.00039	58	133	12	208
934	0.0003598	66	139	15	212
935	0.000428	22	133	20	231
936	0.0003924	20	130	19	233
937	0.0003936	25	142	25	243
938	0.0003607	71	142	16	213
939	0.0003818	36	143	19	250
940	0.0003573	24	126	17	228
941	0.0003743	20	134	16	241
942	0.0003868	7	117	19	227
943	0.0004065	20	121	16	222
944	0.0003785	75	159	18	243
945	0.0003682	7	109	13	211
946	0.0004014	48	135	22	222
947	0.0004026	14	117	12	220
948	0.0003546	76	152	15	211
949	0.0003561	76	149	17	218
950	0.0003884	1	113	14	225
951	0.0003433	22	120	19	218
952	0.0003643	9	102	14	192
953	0.0003394	109	157	21	205
954	0.0003732	82	153	20	224
955	0.0004007	77	185	28	293
956	0.0004093	43	129	17	215
957	0.0003574	37	121	28	205
958	0.0003685	58	130	17	198
959	0.0004373	37	148	22	259
960	0.000354	23	134	14	230
961	0.0004482	22	125	15	222
962	0.0003947	53	151	17	249
963	0.0003914	52	139	18	226
964	0.0003806	69	144	16	205
965	0.0003755	19	136	13	253
966	0.0004169	33	127	16	221
967	0.0004105	62	153	21	244
968	0.0003741	52	138	29	224
969	0.000356	12	119	24	226
970	0.0004188	65	167	23	264
971	0.0004115	38	148	26	258
972	0.0003962	17	144	21	271
973	0.0003784	5	122	13	239
974	0.0003698	32	131	28	230
975	0.0004021	13	135	13	257
976	0.0003597	97	162	19	227
977	0.0003484	63	155	19	238
978	0.0003661	17	127	19	227
979	0.0003715	29	148	15	267
980	0.0003932	30	123	13	216
981	0.0003418	87	163	14	239
982	0.0003796	27	125	13	207
983	0.0003819	29	120	12	211
984	0.000365	79	153	19	226
985	0.0003935	62	174	18	286
986	0.0003753	21	124	17	227
987	0.0003627	35	132	16	229
988	0.0004085	10	143	26	276
989	0.0004006	82	163	16	244
990	0.0003804	19	128	16	237
991	0.0004799	2	119	19	236
992	0.0003503	34	144	23	254
993	0.0004805	35	153	25	271
994	0.0003764	11	119	24	227
995	0.0003691	2	97	15	192
996	0.0003574	61	157	15	253
997	0.000367	14	115	18	216
998	0.0004156	41	152	16	258
999	0.000387	10	110	13	209
mean	0.000385669	39.784	137.592	18.006	233.036

## Sheet: PolyMin_SEq
	time	SEq	Bal	Reg	Egal
0	0.0031652	34	145	20	256
1	0.0026908	121	196	24	271
2	0.003327	55	135	12	215
3	0.0029559	21	123	16	225
4	0.0030134	6	124	20	242
5	0.0028483	7	101	16	195
6	0.0031149	38	128	12	218
7	0.003261	23	131	17	239
8	0.0027262	35	138	27	241
9	0.0031746	4	118	18	232
10	0.003009	2	108	19	214
11	0.0029478	1	114	21	227
12	0.0026386	32	109	17	186
13	0.0028527	47	153	19	259
14	0.0031814	11	121	17	231
15	0.0030886	35	132	16	229
16	0.0030599	4	113	20	222
17	0.0030494	25	151	14	277
18	0.003016	8	118	14	228
19	0.0029878	15	121	14	227
20	0.0030769	20	134	15	248
21	0.0032157	11	127	14	243
22	0.0033918	61	145	23	229
23	0.0029245	5	104	18	203
24	0.003122	33	127	17	221
25	0.0031659	63	134	13	205
26	0.0030923	8	107	13	206
27	0.0029261	42	133	14	224
28	0.0030867	3	116	16	229
29	0.0031007	81	150	15	219
30	0.0033	1	106	18	211
31	0.0032616	1	117	17	233
32	0.0032354	15	110	17	205
33	0.0031234	22	138	14	254
34	0.0029661	22	150	28	278
35	0.0030163	67	140	16	213
36	0.0029451	14	106	22	198
37	0.0030667	29	143	15	257
38	0.0031842	29	135	15	241
39	0.0033391	31	137	13	243
40	0.0027376	24	150	27	276
41	0.003256	8	110	18	212
42	0.0027238	58	152	28	246
43	0.0032242	28	121	16	214
44	0.0029726	14	113	24	212
45	0.0028523	62	163	21	264
46	0.0030408	37	157	17	277
47	0.0030658	79	144	17	209
48	0.0031587	15	145	13	275
49	0.0029211	24	137	17	250
50	0.0031445	21	138	14	255
51	0.0030932	27	165	28	303
52	0.0031245	15	115	21	215
53	0.0031582	76	164	18	252
54	0.0032756	8	113	18	218
55	0.0027951	12	129	26	246
56	0.0032823	10	113	18	216
57	0.0029943	7	105	18	203
58	0.0031414	33	119	16	205
59	0.0027041	152	199	18	246
60	0.0033976	51	135	16	219
61	0.0027067	51	137	26	223
62	0.0027769	93	175	18	257
63	0.0033579	48	140	23	232
64	0.0029102	24	149	26	274
65	0.0030483	14	132	18	250
66	0.0028678	48	118	17	188
67	0.0031781	8	117	20	226
68	0.0030449	6	117	15	228
69	0.0031789	27	134	12	241
70	0.0030122	39	129	28	219
71	0.003177	7	99	12	191
72	0.0034107	78	147	13	216
73	0.0029388	6	117	11	228
74	0.0032825	5	136	17	267
75	0.003188	23	120	12	217
76	0.0030317	14	136	16	258
77	0.0032956	15	106	17	197
78	0.0029294	31	142	23	253
79	0.0029846	55	131	16	207
80	0.0029119	11	118	16	225
81	0.0034241	79	163	19	247
82	0.0031855	12	163	27	314
83	0.003351	29	123	14	217
84	0.0031605	28	120	17	212
85	0.0030043	7	104	14	201
86	0.0030406	39	126	17	213
87	0.0031868	30	126	15	222
88	0.0031831	38	136	17	234
89	0.003213	0	106	16	212
90	0.0029513	67	160	19	253
91	0.0031071	31	138	28	245
92	0.0030072	72	166	23	260
93	0.00303	74	151	14	228
94	0.003126	34	118	15	202
95	0.0030729	36	136	16	236
96	0.0031294	13	102	10	191
97	0.0029355	1	135	16	269
98	0.0035226	7	125	15	243
99	0.0030764	5	99	12	193
100	0.0027974	37	142	26	247
101	0.003119	20	149	26	278
102	0.0029024	29	127	28	225
103	0.0028981	56	132	16	208
104	0.0030734	12	112	16	212
105	0.003108	18	120	12	222
106	0.0031083	32	137	17	242
107	0.0028795	22	153	27	284
108	0.0029951	74	152	16	230
109	0.0032814	36	136	18	236
110	0.0030618	11	106	11	201
111	0.0031352	0	107	13	214
112	0.0031499	58	148	19	238
113	0.0031484	15	99	17	183
114	0.0030012	8	96	19	184
115	0.0027616	18	122	23	226
116	0.0031088	16	146	15	276
117	0.0027757	7	126	24	245
118	0.0031039	49	135	15	221
119	0.0030914	46	152	25	258
120	0.0033058	84	158	14	232
121	0.0031266	54	139	16	224
122	0.0041043	13	110	16	207
123	0.0027779	15	98	13	181
124	0.0029161	19	101	17	183
125	0.0030066	8	120	15	232
126	0.0030704	9	103	16	197
127	0.0030247	2	101	29	200
128	0.0032456	64	158	16	252
129	0.0029276	23	152	20	281
130	0.0033449	23	127	12	231
131	0.0031186	45	130	18	215
132	0.002909	38	122	16	206
133	0.0028832	17	128	20	239
134	0.002941	3	108	27	213
135	0.0029061	33	135	14	237
136	0.0030249	11	122	15	233
137	0.0031847	7	129	14	251
138	0.0032013	10	111	12	212
139	0.0032565	103	170	18	237
140	0.0030673	32	140	29	248
141	0.0027508	43	154	29	265
142	0.00318	83	160	19	237
143	0.0031379	44	138	18	232
144	0.0028399	2	105	15	208
145	0.0029423	44	145	16	246
146	0.0031801	10	110	15	210
147	0.0032713	20	103	17	186
148	0.0033189	45	138	20	231
149	0.0032904	18	129	14	240
150	0.0032062	38	126	17	214
151	0.0032122	27	115	19	203
152	0.0032007	27	118	17	209
153	0.0031141	22	112	12	202
154	0.0031006	42	145	16	248
155	0.0026998	44	142	17	240
156	0.0028045	23	118	15	213
157	0.0032137	20	132	14	244
158	0.0030104	27	138	26	249
159	0.0033862	20	131	17	242
160	0.0031225	31	125	13	219
161	0.0030031	88	140	13	192
162	0.003023	14	113	14	212
163	0.0034556	7	137	25	267
164	0.0029931	2	95	19	188
165	0.0033513	23	118	22	213
166	0.0030371	29	148	15	267
167	0.0028407	40	107	13	174
168	0.0030326	32	160	26	288
169	0.0030517	42	139	12	236
170	0.0031102	13	123	18	233
171	0.0032606	7	116	20	225
172	0.0031182	14	128	26	242
173	0.0030246	108	187	19	266
174	0.0034098	68	167	14	266
175	0.0026714	21	122	15	223
176	0.0032126	15	109	13	203
177	0.0031933	42	135	15	228
178	0.0030663	3	121	25	239
179	0.0040179	32	136	14	240
180	0.0032222	99	182	23	265
181	0.0031673	30	135	15	240
182	0.0034872	18	110	12	202
183	0.0031534	4	118	16	232
184	0.0029821	54	134	17	214
185	0.0031996	6	118	16	230
186	0.0029143	65	143	16	221
187	0.0030931	0	110	14	220
188	0.0029788	33	135	16	237
189	0.0029537	102	162	18	222
190	0.0032445	2	112	17	222
191	0.0032254	41	138	14	235
192	0.0032305	23	118	17	213
193	0.0032747	32	144	25	256
194	0.0030737	42	134	12	226
195	0.0029598	22	124	19	226
196	0.0029124	45	143	24	241
197	0.003618	31	124	20	217
198	0.0031079	15	120	22	225
199	0.0030047	28	140	22	252
200	0.0030223	31	113	12	195
201	0.0030537	15	120	17	225
202	0.0030542	54	175	28	296
203	0.0031907	0	121	16	242
204	0.0032891	69	142	14	215
205	0.0031202	15	108	17	201
206	0.0031498	22	122	12	222
207	0.0029279	46	148	17	250
208	0.0030526	13	105	12	197
209	0.0030906	6	106	11	206
210	0.0031215	23	112	18	201
211	0.0032405	53	150	15	247
212	0.0032358	53	149	17	245
213	0.0031931	42	122	20	202
214	0.0034426	22	130	13	238
215	0.0031962	2	104	14	206
216	0.002995	33	134	17	235
217	0.0029417	121	180	21	239
218	0.0034779	36	122	15	208
219	0.0028068	30	136	15	242
220	0.0028251	67	147	23	227
221	0.003044	9	122	16	235
222	0.0030478	40	131	21	222
223	0.0031087	32	143	16	254
224	0.0030646	4	128	16	252
225	0.0032117	58	145	14	232
226	0.0032233	30	128	10	226
227	0.0031946	39	122	17	205
228	0.0031632	14	113	18	212
229	0.0031282	86	163	19	240
230	0.0031408	37	130	13	223
231	0.0031202	87	156	13	225
232	0.0030257	18	163	25	308
233	0.0026488	137	205	26	273
234	0.0033133	17	126	15	235
235	0.0028693	40	138	16	236
236	0.003113	10	99	15	188
237	0.0029964	12	118	13	224
238	0.003162	65	133	17	201
239	0.0032422	45	120	13	195
240	0.0029794	4	139	27	274
241	0.0030547	40	132	16	224
242	0.0032306	3	100	15	197
243	0.0030754	21	141	13	261
244	0.0031156	46	149	15	252
245	0.0035914	73	159	13	245
246	0.0030684	32	133	13	234
247	0.0030538	1	118	14	235
248	0.0034311	2	126	16	250
249	0.0028785	10	122	18	234
250	0.00293	33	131	19	229
251	0.0033075	19	114	15	209
252	0.0030353	66	133	15	200
253	0.0033573	7	106	14	205
254	0.0030993	2	130	14	258
255	0.0028454	48	146	28	244
256	0.0029337	24	127	29	230
257	0.003031	39	147	23	255
258	0.0030059	36	117	18	198
259	0.0029829	15	115	16	215
260	0.0031312	23	128	16	233
261	0.0030256	56	141	16	226
262	0.0031193	59	135	11	211
263	0.003122	12	121	18	230
264	0.0031806	5	106	14	207
265	0.0032133	35	151	24	267
266	0.0027566	34	123	18	212
267	0.0030638	13	115	18	217
268	0.0031293	21	139	15	257
269	0.0031458	15	141	13	267
270	0.0031891	20	133	12	246
271	0.0031385	9	119	16	229
272	0.0031024	19	122	27	225
273	0.0032802	45	145	17	245
274	0.003356	77	148	14	219
275	0.003051	43	145	28	247
276	0.0030929	29	135	15	241
277	0.0031156	52	126	13	200
278	0.003172	23	136	17	249
279	0.0030144	9	134	26	259
280	0.0029807	75	167	22	259
281	0.0029395	24	139	25	254
282	0.0030199	20	118	22	216
283	0.0030217	23	117	13	211
284	0.0029154	45	119	12	193
285	0.0031875	41	131	19	221
286	0.003048	4	123	14	242
287	0.0031466	55	129	17	203
288	0.0027915	78	167	17	256
289	0.0029239	12	112	14	212
290	0.0030431	36	135	14	234
291	0.0028589	113	173	16	233
292	0.0031832	14	104	14	194
293	0.0029908	52	149	18	246
294	0.0029647	1	113	15	225
295	0.0030069	32	136	16	240
296	0.0031729	27	99	13	171
297	0.0029897	5	138	29	271
298	0.0033219	9	129	14	249
299	0.0030455	5	145	22	285
300	0.0029964	15	119	13	223
301	0.0030542	4	105	12	206
302	0.002968	47	114	20	181
303	0.0032177	21	120	13	219
304	0.0030711	41	114	16	187
305	0.0029704	16	126	24	236
306	0.0026821	125	203	18	281
307	0.0031368	36	156	29	276
308	0.0030088	87	148	12	209
309	0.0034986	11	129	17	247
310	0.0032211	45	135	18	225
311	0.0031683	36	123	12	210
312	0.003906	14	111	16	208
313	0.0030412	18	126	14	234
314	0.0031642	49	157	16	265
315	0.0027808	12	111	26	210
316	0.0029931	33	119	14	205
317	0.0029112	41	135	29	229
318	0.0032784	28	127	18	226
319	0.0032628	13	120	17	227
320	0.0031076	33	124	15	215
321	0.0032661	47	139	15	231
322	0.0031213	57	146	19	235
323	0.0030601	58	146	16	234
324	0.0031421	25	133	15	241
325	0.0028332	115	185	21	255
326	0.0027943	108	175	20	242
327	0.0031844	51	130	13	209
328	0.0031647	13	111	15	209
329	0.0033154	49	116	17	183
330	0.0032743	82	141	14	200
331	0.0031464	6	126	15	246
332	0.0030608	34	138	17	242
333	0.0038635	23	124	14	225
334	0.0031571	98	177	22	256
335	0.0030834	35	151	14	267
336	0.0029816	56	164	22	272
337	0.003116	42	126	11	210
338	0.0030876	20	129	25	238
339	0.003217	25	133	13	241
340	0.0029936	31	121	18	211
341	0.0032158	19	131	19	243
342	0.0031942	1	100	13	199
343	0.0029615	88	150	19	212
344	0.0027024	19	114	16	209
345	0.0030792	5	129	19	253
346	0.0032698	47	143	19	239
347	0.0030169	6	121	18	236
348	0.0031193	30	131	16	232
349	0.0031687	14	97	13	180
350	0.0027759	47	148	26	249
351	0.0030896	43	119	16	195
352	0.003056	7	123	23	239
353	0.0028803	41	137	12	233
354	0.0032848	5	116	15	227
355	0.0031974	50	133	15	216
356	0.0033889	9	128	18	247
357	0.0032392	23	134	19	245
358	0.0028487	43	129	21	215
359	0.0035593	29	126	23	223
360	0.0029986	33	136	27	239
361	0.0030792	87	147	19	207
362	0.002858	21	134	17	247
363	0.0030973	22	121	14	220
364	0.0028305	24	138	22	252
365	0.0035417	10	123	18	236
366	0.0028849	65	141	14	217
367	0.0029478	1	116	19	231
368	0.0036847	1	114	16	227
369	0.0029961	3	110	15	217
370	0.003083	75	137	11	199
371	0.0030087	28	109	15	190
372	0.0028662	6	106	15	206
373	0.0031647	65	143	14	221
374	0.0032409	20	134	19	248
375	0.0031137	17	112	15	207
376	0.0026861	69	130	17	191
377	0.0030448	11	115	15	219
378	0.0030412	1	114	13	227
379	0.0032706	70	148	16	226
380	0.0030934	2	114	18	226
381	0.0029739	9	122	16	235
382	0.002962	41	122	14	203
383	0.0029425	65	153	15	241
384	0.003353	58	157	14	256
385	0.0031859	41	132	16	223
386	0.002959	16	126	22	236
387	0.0031793	41	133	22	225
388	0.0028875	68	146	18	224
389	0.0030547	66	151	26	236
390	0.0031057	128	189	21	250
391	0.0037219	1	122	16	243
392	0.0032388	32	126	15	220
393	0.0029837	49	147	13	245
394	0.0032352	1	107	12	213
395	0.0033733	3	113	15	223
396	0.0039802	76	143	15	210
397	0.0031737	50	123	13	196
398	0.003012	83	138	14	193
399	0.0029226	25	119	29	213
400	0.0033951	16	109	16	202
401	0.002848	2	122	28	242
402	0.0030288	21	130	16	239
403	0.0029365	25	115	16	205
404	0.0030122	31	137	16	243
405	0.0030411	31	141	29	251
406	0.003018	40	124	19	208
407	0.0030573	57	167	26	277
408	0.0028709	74	141	20	208
409	0.0032008	8	117	12	226
410	0.0032907	50	134	15	218
411	0.0030798	17	105	16	193
412	0.0031092	13	118	13	223
413	0.0030499	1	106	14	211
414	0.0031146	19	114	15	209
415	0.0030274	19	116	19	213
416	0.0031222	4	133	20	262
417	0.0032368	5	113	13	221
418	0.0032011	15	129	12	243
419	0.0027556	21	122	14	223
420	0.002969	38	138	15	238
421	0.0031414	4	115	16	226
422	0.0030742	76	149	14	222
423	0.0031023	12	124	13	236
424	0.0031218	17	114	13	211
425	0.002995	53	145	14	237
426	0.0031416	6	138	17	270
427	0.0029991	66	160	25	254
428	0.0031278	60	132	14	204
429	0.0031558	14	124	17	234
430	0.0031678	34	117	15	200
431	0.0030571	16	128	17	240
432	0.003136	3	93	14	183
433	0.0030487	13	112	17	211
434	0.0029651	49	136	19	223
435	0.0035268	38	130	17	222
436	0.0031705	8	111	13	214
437	0.0032919	17	121	27	225
438	0.0031995	57	132	21	207
439	0.0029741	52	143	18	234
440	0.0034828	14	119	14	224
441	0.0033711	15	111	13	207
442	0.0031502	3	114	11	225
443	0.0029994	9	111	16	213
444	0.0030462	37	126	17	215
445	0.0032367	41	132	21	223
446	0.0029024	29	118	12	207
447	0.0028555	12	129	29	246
448	0.0030273	3	109	15	215
449	0.0030321	2	110	20	218
450	0.0030218	28	121	20	214
451	0.0033042	11	107	18	203
452	0.0031989	45	140	20	235
453	0.003367	20	121	15	222
454	0.0032864	104	186	15	268
455	0.0030549	31	133	17	235
456	0.0029392	6	115	18	224
457	0.0031419	53	140	13	227
458	0.0026753	33	119	21	205
459	0.0028974	5	104	12	203
460	0.0034878	45	141	14	237
461	0.0032633	35	137	15	239
462	0.0033364	5	114	26	223
463	0.0030645	7	123	16	239
464	0.0028942	25	133	18	241
465	0.0031096	50	143	18	236
466	0.0030435	20	115	14	210
467	0.0030242	7	109	19	211
468	0.0029574	59	138	15	217
469	0.0028588	36	115	13	194
470	0.0030577	42	145	19	248
471	0.0034218	4	121	12	238
472	0.0029238	34	140	15	246
473	0.003048	48	161	16	274
474	0.0034127	22	117	20	212
475	0.0031936	59	124	12	189
476	0.0032278	13	128	13	243
477	0.0030581	55	146	15	237
478	0.002889	4	118	23	232
479	0.0031116	41	137	16	233
480	0.0032096	4	123	13	242
481	0.0031715	41	128	17	215
482	0.0030974	14	116	16	218
483	0.0033195	23	133	18	243
484	0.0030969	59	150	18	241
485	0.0031918	55	141	14	227
486	0.0030929	19	118	16	217
487	0.0029065	45	142	22	239
488	0.0028095	19	157	29	295
489	0.00289	55	165	18	275
490	0.003046	2	101	13	200
491	0.0030126	17	140	17	263
492	0.0028851	35	135	20	235
493	0.0030338	37	143	16	249
494	0.0029944	69	146	15	223
495	0.0029356	11	109	17	207
496	0.0028537	56	154	17	252
497	0.0030772	1	111	17	221
498	0.0030685	18	119	18	220
499	0.0033773	40	111	15	182
500	0.0031628	12	112	13	212
501	0.0030836	53	123	19	193
502	0.003016	21	106	19	191
503	0.0029839	51	153	19	255
504	0.0031953	53	113	15	173
505	0.0030833	34	135	20	236
506	0.0029059	38	144	17	250
507	0.0030227	32	135	12	238
508	0.0030809	24	135	19	246
509	0.0030407	31	126	15	221
510	0.0029234	39	122	11	205
511	0.0033371	17	117	16	217
512	0.0038956	14	118	15	222
513	0.0030378	6	130	19	254
514	0.0030573	37	122	17	207
515	0.0030437	1	112	20	223
516	0.0028472	32	117	16	202
517	0.0032292	61	153	19	245
518	0.0031984	16	105	11	194
519	0.0031456	9	113	19	217
520	0.0032194	32	124	16	216
521	0.0028753	43	120	13	197
522	0.0032975	19	121	14	223
523	0.0029744	3	111	16	219
524	0.0031369	18	125	13	232
525	0.0029406	14	119	15	224
526	0.003055	53	131	13	209
527	0.0027851	13	112	19	211
528	0.0029297	11	141	25	271
529	0.0036342	9	127	16	245
530	0.0030032	33	122	20	211
531	0.0029896	0	124	18	248
532	0.0029954	60	160	29	260
533	0.0032979	9	104	15	199
534	0.0030542	2	126	16	250
535	0.002898	7	121	16	235
536	0.0029121	18	115	15	212
537	0.0033814	42	135	13	228
538	0.0029739	54	166	28	278
539	0.0032678	25	139	17	253
540	0.0028364	21	123	22	225
541	0.0032768	5	144	16	283
542	0.0029159	25	132	14	239
543	0.0031882	16	122	16	228
544	0.0029546	37	140	18	243
545	0.0028678	25	137	27	249
546	0.0029059	95	162	15	229
547	0.0033217	31	122	16	213
548	0.0031992	21	119	18	217
549	0.0033339	3	114	17	225
550	0.0030118	20	127	18	234
551	0.0034265	9	125	16	241
552	0.0030832	30	121	13	212
553	0.0029887	12	102	15	192
554	0.0034036	13	138	16	263
555	0.0031044	55	129	24	203
556	0.0030473	53	142	14	231
557	0.0029833	3	103	14	203
558	0.0031717	33	157	16	281
559	0.0031727	21	110	15	199
560	0.0029412	12	138	18	264
561	0.0034577	10	106	12	202
562	0.0034973	8	143	16	278
563	0.0029696	18	98	13	178
564	0.0032359	31	134	19	237
565	0.0029066	7	109	15	211
566	0.0031293	6	118	16	230
567	0.0031919	35	117	17	199
568	0.002968	46	145	25	244
569	0.0033058	8	107	11	206
570	0.0030639	7	122	23	237
571	0.0031913	46	158	17	270
572	0.0029082	92	177	15	262
573	0.0028985	82	176	27	270
574	0.0029164	75	144	14	213
575	0.0029127	42	143	28	244
576	0.0027941	74	155	18	236
577	0.0030226	31	120	19	209
578	0.003237	3	128	16	253
579	0.0029542	48	154	25	260
580	0.0029022	7	123	26	239
581	0.0029963	58	150	21	242
582	0.0027196	42	139	23	236
583	0.0031892	9	108	17	207
584	0.0030318	42	158	21	274
585	0.003027	13	116	17	219
586	0.0031909	0	132	21	264
587	0.0033093	2	117	16	232
588	0.0030025	1	142	28	283
589	0.0028414	24	106	14	188
590	0.0033075	38	142	17	246
591	0.0034157	2	123	14	244
592	0.0033168	49	143	18	237
593	0.0030254	45	133	18	221
594	0.0032081	51	136	19	221
595	0.003413	61	148	19	235
596	0.0030971	36	119	14	202
597	0.0032088	5	112	13	219
598	0.0032653	58	134	14	210
599	0.0030629	3	118	18	233
600	0.0030842	23	116	16	209
601	0.0032867	4	114	13	224
602	0.002907	16	140	29	264
603	0.0030052	64	155	17	246
604	0.003678	65	137	15	209
605	0.0030943	14	114	17	214
606	0.003195	46	116	16	186
607	0.0030995	40	138	16	236
608	0.0028513	15	102	15	189
609	0.0031089	12	124	15	236
610	0.0029655	79	160	14	241
611	0.0032164	12	144	24	276
612	0.0028654	71	166	23	261
613	0.0029415	35	120	14	205
614	0.0031841	17	153	27	289
615	0.0030773	25	121	14	217
616	0.0034523	86	142	16	198
617	0.0031357	25	117	16	209
618	0.0030029	19	128	25	237
619	0.003503	10	128	14	246
620	0.0030747	16	142	19	268
621	0.0036814	8	123	24	238
622	0.0031495	73	137	17	201
623	0.0032166	18	123	15	228
624	0.0030743	23	131	17	239
625	0.0029619	65	147	14	229
626	0.0030867	12	121	15	230
627	0.0031437	4	120	14	236
628	0.0036223	56	152	15	248
629	0.0029832	58	154	14	250
630	0.003324	12	124	14	236
631	0.0027192	42	119	15	196
632	0.0029653	48	131	24	214
633	0.0034237	6	123	15	240
634	0.0030168	27	107	11	187
635	0.0030054	132	191	19	250
636	0.0032705	18	147	26	276
637	0.0033832	64	156	14	248
638	0.0031751	68	142	19	216
639	0.0027308	4	126	24	248
640	0.0031425	4	105	12	206
641	0.0030793	41	144	15	247
642	0.0030356	10	140	26	270
643	0.0031632	23	136	15	249
644	0.0030776	7	98	15	189
645	0.0031616	3	119	18	235
646	0.0031778	29	113	16	197
647	0.0032907	8	119	25	230
648	0.0031423	11	112	17	213
649	0.0029189	25	122	21	219
650	0.0026941	6	114	15	222
651	0.0030489	17	130	14	243
652	0.0031113	81	177	29	273
653	0.002993	11	110	11	209
654	0.0031446	52	150	16	248
655	0.0028387	54	145	23	236
656	0.0031374	8	116	21	224
657	0.0031809	4	115	20	226
658	0.0031918	56	128	10	200
659	0.0031296	20	123	17	226
660	0.0030872	2	119	14	236
661	0.0029648	6	107	14	208
662	0.0030157	27	136	22	245
663	0.0030733	64	149	19	234
664	0.0033424	62	156	16	250
665	0.0034633	73	155	17	237
666	0.0029617	2	119	12	236
667	0.0032431	5	117	19	229
668	0.0032643	37	133	15	229
669	0.0036721	30	133	16	236
670	0.0028456	22	135	18	248
671	0.0028772	10	144	28	278
672	0.003205	55	156	15	257
673	0.0029444	104	190	25	276
674	0.0034452	9	130	16	251
675	0.0030722	35	148	29	261
676	0.0031314	110	172	17	234
677	0.0030562	31	133	17	235
678	0.0032849	15	128	26	241
679	0.0029656	58	144	18	230
680	0.0028578	71	139	16	207
681	0.0029697	6	119	23	232
682	0.0031309	18	128	17	238
683	0.0031585	62	125	17	188
684	0.003195	18	109	13	200
685	0.0030994	33	152	21	271
686	0.0029995	104	160	18	216
687	0.0033964	21	145	19	269
688	0.0029327	14	94	18	174
689	0.0029828	35	135	16	235
690	0.0027959	108	187	24	266
691	0.0029419	59	137	15	215
692	0.0032369	15	104	16	193
693	0.0030906	19	121	14	223
694	0.0029475	15	109	13	203
695	0.0031027	23	124	12	225
696	0.0030471	72	135	18	198
697	0.0029578	12	131	26	250
698	0.0028496	41	146	23	251
699	0.0033867	34	137	15	240
700	0.0030902	24	116	11	208
701	0.0027862	21	146	29	271
702	0.0031189	37	132	16	227
703	0.0027412	45	147	15	249
704	0.0032279	17	123	15	229
705	0.0026602	57	156	20	255
706	0.0029016	38	134	15	230
707	0.0030478	74	163	19	252
708	0.003231	38	156	19	274
709	0.003062	10	118	14	226
710	0.0030239	67	143	14	219
711	0.0029336	15	122	15	229
712	0.0031884	67	148	15	229
713	0.0031668	54	140	21	226
714	0.0027419	18	137	15	256
715	0.0030985	15	103	15	191
716	0.0031146	7	101	16	195
717	0.003146	14	115	13	216
718	0.0029915	51	145	18	239
719	0.0027956	11	109	13	207
720	0.0031688	45	124	16	203
721	0.0030286	20	125	14	230
722	0.0031746	12	121	13	230
723	0.003203	12	118	19	224
724	0.0032306	43	147	15	251
725	0.0030173	10	122	25	234
726	0.003073	56	139	24	222
727	0.0033956	29	152	25	275
728	0.0031155	13	128	18	243
729	0.0029155	54	142	15	230
730	0.0030277	14	121	16	228
731	0.0031836	34	116	18	198
732	0.0030686	6	129	15	252
733	0.0031427	1	139	15	277
734	0.0028354	8	105	16	202
735	0.0029624	2	123	14	244
736	0.0029418	93	171	28	249
737	0.0032504	55	151	16	247
738	0.0032621	8	129	18	250
739	0.0030263	74	152	19	230
740	0.0029936	21	125	15	229
741	0.0031504	18	125	22	232
742	0.0031464	63	146	18	229
743	0.0029422	82	169	22	256
744	0.0029433	33	100	15	167
745	0.0029501	12	112	19	212
746	0.0033536	32	135	18	238
747	0.0035009	59	142	15	225
748	0.0033089	22	125	15	228
749	0.0032596	5	124	17	243
750	0.00329	80	142	16	204
751	0.0031191	33	130	14	227
752	0.0029897	2	116	16	230
753	0.003189	0	121	18	242
754	0.0029802	43	136	15	229
755	0.0027198	35	139	17	243
756	0.0028311	40	132	20	224
757	0.0029884	72	146	20	220
758	0.0028755	103	160	16	217
759	0.0032411	6	112	12	218
760	0.0031185	66	133	14	200
761	0.0026935	3	120	14	237
762	0.0029839	49	146	24	243
763	0.0032941	2	136	16	270
764	0.0030771	62	150	14	238
765	0.0029981	43	133	17	223
766	0.0032003	3	128	15	253
767	0.0031662	55	148	16	241
768	0.0033274	11	119	15	227
769	0.0030533	68	137	17	206
770	0.0031624	44	143	16	242
771	0.0032702	59	148	16	237
772	0.0030677	29	128	16	227
773	0.0035228	64	137	13	210
774	0.0031776	48	131	17	214
775	0.0029982	3	114	17	225
776	0.0032011	9	95	13	181
777	0.003145	1	111	12	221
778	0.0028323	33	136	22	239
779	0.0032846	6	116	13	226
780	0.0027477	40	126	12	212
781	0.0029483	23	147	17	271
782	0.0032837	60	150	18	240
783	0.0030605	44	133	25	222
784	0.0027374	42	145	25	248
785	0.0030631	5	133	17	261
786	0.003186	3	121	14	239
787	0.0031037	114	201	29	288
788	0.0029316	78	161	21	244
789	0.0032108	26	129	13	232
790	0.0026591	35	145	25	255
791	0.0032897	22	129	18	236
792	0.003023	10	124	15	238
793	0.0029784	17	123	18	229
794	0.0031656	4	109	17	214
795	0.0029981	17	98	13	179
796	0.0030594	32	150	18	268
797	0.0030559	2	109	14	216
798	0.0032572	33	125	14	217
799	0.0029737	45	156	29	267
800	0.0029657	42	159	26	276
801	0.003264	33	144	14	255
802	0.0031382	33	132	17	231
803	0.0032307	81	154	16	227
804	0.0031379	92	154	21	216
805	0.0032662	28	126	23	224
806	0.0031281	48	160	14	272
807	0.0029568	21	112	13	203
808	0.0032794	47	136	15	225
809	0.0029619	39	140	13	241
810	0.0027289	35	165	29	295
811	0.002813	4	126	19	248
812	0.0032628	1	129	14	257
813	0.0028276	53	145	17	237
814	0.0032392	7	116	13	225
815	0.002895	83	169	17	255
816	0.0033698	15	125	20	235
817	0.0026526	21	119	15	217
818	0.0033729	22	113	16	204
819	0.0027595	22	142	28	262
820	0.0030353	68	136	17	204
821	0.0031743	15	118	15	221
822	0.0026499	14	101	12	188
823	0.003435	24	136	17	248
824	0.0028869	66	170	26	274
825	0.0031937	58	142	11	226
826	0.0033536	12	108	13	204
827	0.0029683	12	107	13	202
828	0.0030789	73	140	18	207
829	0.0031184	24	128	13	232
830	0.0029834	42	112	13	182
831	0.0027279	25	141	18	257
832	0.0030412	68	139	11	210
833	0.0029556	2	115	16	228
834	0.0031916	6	109	12	212
835	0.0033456	70	168	18	266
836	0.003052	24	104	13	184
837	0.0031733	12	113	16	214
838	0.0031443	12	143	27	274
839	0.0030247	20	131	24	242
840	0.0030555	52	125	13	198
841	0.0031459	15	108	15	201
842	0.0028199	32	112	14	192
843	0.0031813	66	143	15	220
844	0.0029489	40	147	14	254
845	0.0032811	39	132	14	225
846	0.0030275	33	121	17	209
847	0.0030418	52	137	13	222
848	0.0029782	41	129	16	217
849	0.0031571	5	111	14	217
850	0.0032128	1	114	14	227
851	0.0031332	22	128	16	234
852	0.00279	60	170	27	280
853	0.0030849	9	117	15	225
854	0.0029295	57	135	18	213
855	0.003438	10	112	12	214
856	0.0033132	34	131	16	228
857	0.0032321	25	110	14	195
858	0.0028567	6	128	20	250
859	0.0034899	59	140	14	221
860	0.0032387	18	125	18	232
861	0.0031421	61	160	25	259
862	0.0029231	65	143	20	221
863	0.0029386	62	136	15	210
864	0.0030117	53	145	21	237
865	0.0033442	45	126	13	207
866	0.0029852	20	126	14	232
867	0.0031132	28	130	20	232
868	0.0029693	32	146	15	260
869	0.0034549	52	131	14	210
870	0.0027657	5	116	15	227
871	0.0028783	15	125	14	235
872	0.0027931	16	126	17	236
873	0.0030595	2	119	17	236
874	0.0030686	6	109	19	212
875	0.003138	8	112	15	216
876	0.0031161	26	139	19	252
877	0.0030857	34	148	25	262
878	0.0030022	5	118	14	231
879	0.0031099	40	145	18	250
880	0.0030303	3	129	14	255
881	0.0030307	5	131	20	257
882	0.0031969	11	116	15	221
883	0.0029495	4	136	27	268
884	0.0030192	19	124	14	229
885	0.0031643	47	122	16	197
886	0.003225	0	110	15	220
887	0.0030665	3	118	18	233
888	0.0029684	56	144	26	232
889	0.0033743	23	134	17	245
890	0.0030128	22	121	21	220
891	0.0033043	10	122	15	234
892	0.0030028	10	114	23	218
893	0.0026414	32	147	28	262
894	0.0030643	83	165	23	247
895	0.0034755	43	143	12	243
896	0.0029047	63	160	19	257
897	0.0033114	19	121	18	223
898	0.0027199	0	98	12	196
899	0.0031241	40	143	18	246
900	0.0032237	28	122	14	216
901	0.0031365	41	123	14	205
902	0.0030655	21	142	20	263
903	0.0031208	35	142	14	249
904	0.0032559	23	124	16	225
905	0.0033195	15	111	15	207
906	0.002822	22	136	14	250
907	0.0031891	51	139	17	227
908	0.0034038	14	105	12	196
909	0.0030411	12	107	14	202
910	0.003198	4	114	15	224
911	0.0032698	11	128	17	245
912	0.0031496	2	132	16	262
913	0.0028833	43	160	16	277
914	0.0029919	13	125	28	237
915	0.0031568	45	142	23	239
916	0.0029621	8	113	16	218
917	0.0029844	24	150	19	276
918	0.0030209	21	135	17	249
919	0.0030926	40	158	25	276
920	0.0031449	8	120	13	232
921	0.0030201	1	110	18	219
922	0.0032083	43	137	15	231
923	0.0032611	29	121	19	213
924	0.0030625	17	127	16	237
925	0.0030943	3	111	12	219
926	0.0033246	11	110	15	209
927	0.002964	75	164	22	253
928	0.0031803	37	120	16	203
929	0.0031266	16	157	21	298
930	0.0029468	23	144	20	265
931	0.0033362	56	137	14	218
932	0.0031529	58	132	17	206
933	0.003162	0	102	12	204
934	0.0032369	66	139	15	212
935	0.003233	53	145	19	237
936	0.0029853	53	143	19	233
937	0.0031601	14	124	25	234
938	0.0031784	32	115	16	198
939	0.0030363	2	125	19	248
940	0.003194	12	120	17	228
941	0.0030094	20	134	16	248
942	0.0029019	7	117	19	227
943	0.0030195	20	121	16	222
944	0.0033614	44	126	15	208
945	0.0030627	7	109	13	211
946	0.0031422	50	131	13	212
947	0.0030934	14	117	12	220
948	0.0030626	5	106	15	207
949	0.0031323	5	113	16	221
950	0.0029956	17	115	12	213
951	0.0034495	88	141	19	194
952	0.0031975	9	102	14	195
953	0.0032308	29	109	16	189
954	0.0032801	19	111	13	203
955	0.0030721	77	185	28	293
956	0.0034618	37	127	13	217
957	0.0028937	37	121	28	205
958	0.0032272	24	108	12	192
959	0.0028592	37	148	22	259
960	0.0031532	17	123	15	229
961	0.003151	43	132	15	221
962	0.0028045	53	151	17	249
963	0.0032801	28	121	14	214
964	0.0034259	73	138	16	203
965	0.0031276	19	136	13	253
966	0.0029369	33	127	16	221
967	0.0028812	62	153	21	244
968	0.0030251	52	138	29	224
969	0.0030378	12	119	24	226
970	0.0029434	84	174	23	264
971	0.0027397	38	148	26	258
972	0.0029936	55	161	21	267
973	0.0028041	5	122	14	239
974	0.0027861	32	131	28	230
975	0.0035601	55	152	13	249
976	0.0036335	38	124	15	210
977	0.0031414	103	170	19	237
978	0.0028742	27	127	19	227
979	0.0032621	7	134	15	261
980	0.0029512	30	123	13	216
981	0.0031281	3	110	13	217
982	0.0029108	51	129	13	207
983	0.0031156	29	120	12	211
984	0.0032715	34	133	15	232
985	0.0030544	62	174	18	286
986	0.0028304	21	124	17	227
987	0.0031664	6	116	16	226
988	0.0030034	10	143	26	276
989	0.0031523	35	139	17	243
990	0.0027622	19	128	16	237
991	0.0031205	28	125	17	222
992	0.0035034	73	151	23	229
993	0.003103	16	143	25	270
994	0.002945	11	119	24	227
995	0.0028634	2	97	15	192
996	0.0034519	43	136	12	229
997	0.003234	38	126	12	214
998	0.002983	68	163	16	258
999	0.0030433	91	150	13	209
mean	0.00309585	31.847	130.882	17.366	229.917

## Sheet: PolyMin_Bal
	time	SEq	Bal	Reg	Egal
0	0.0032887	34	145	20	256
1	0.0027197	121	196	24	271
2	0.0032783	55	135	12	215
3	0.0031617	21	123	16	225
4	0.0029121	6	124	20	242
5	0.0028558	7	101	16	195
6	0.0033665	38	128	12	218
7	0.0030707	23	131	17	239
8	0.0026884	35	138	27	241
9	0.0028446	4	118	18	232
10	0.0030252	2	108	19	214
11	0.0031913	1	114	21	227
12	0.0026649	32	109	17	186
13	0.0028391	47	153	19	259
14	0.0030915	11	121	17	231
15	0.0030786	35	132	16	229
16	0.0030162	4	113	20	222
17	0.0029132	25	151	14	277
18	0.0030855	8	118	14	228
19	0.0029491	15	121	14	227
20	0.003177	20	134	15	248
21	0.0030677	11	127	14	243
22	0.002986	61	145	23	229
23	0.0030374	5	104	18	203
24	0.0030591	33	127	17	221
25	0.0031535	63	134	13	205
26	0.0030217	8	107	13	206
27	0.0029536	42	133	14	224
28	0.002996	3	116	16	229
29	0.0031506	81	150	15	219
30	0.0030177	1	106	18	211
31	0.0030075	1	117	17	233
32	0.0033184	15	110	17	205
33	0.0030495	22	138	14	254
34	0.0031021	22	150	28	278
35	0.0028932	67	140	16	213
36	0.0030279	14	106	22	198
37	0.0032059	34	139	15	244
38	0.0031868	29	135	15	241
39	0.0030135	31	137	13	243
40	0.0028559	24	150	27	276
41	0.0036068	8	110	18	212
42	0.0027527	58	152	28	246
43	0.0030735	28	121	16	214
44	0.0031929	14	113	24	212
45	0.0026561	62	163	21	264
46	0.0032099	37	157	17	277
47	0.0030298	79	144	17	209
48	0.0033918	15	145	13	275
49	0.0028622	24	137	17	250
50	0.0034504	21	134	14	247
51	0.0029257	27	165	28	303
52	0.0031476	15	115	21	215
53	0.0032109	76	164	18	252
54	0.0032154	8	113	18	218
55	0.0030612	12	129	26	246
56	0.003125	10	113	18	216
57	0.003018	7	105	18	203
58	0.003533	33	119	16	205
59	0.003274	152	199	18	246
60	0.0030911	51	135	16	219
61	0.0028951	51	137	26	223
62	0.0028018	93	175	18	257
63	0.0032337	48	140	23	232
64	0.003248	24	149	26	274
65	0.00314	14	132	18	250
66	0.0027188	48	118	17	188
67	0.003039	11	114	21	217
68	0.0030409	6	117	15	228
69	0.0031736	27	134	12	241
70	0.002992	39	129	28	219
71	0.0032673	7	99	12	191
72	0.0031819	78	147	13	216
73	0.003094	6	117	11	228
74	0.0032736	9	133	17	257
75	0.0032861	23	120	12	217
76	0.0029502	14	136	16	258
77	0.0031631	15	106	17	197
78	0.0034079	31	142	23	253
79	0.0031716	55	131	16	207
80	0.0030283	11	118	16	225
81	0.0032552	79	163	19	247
82	0.0030301	12	163	27	314
83	0.0032891	29	123	14	217
84	0.0031915	28	120	17	212
85	0.0033655	9	102	14	195
86	0.0032513	39	126	17	213
87	0.0031213	30	126	15	222
88	0.0030051	38	136	17	234
89	0.0033731	0	106	16	212
90	0.0030326	67	160	19	253
91	0.0029092	31	138	28	245
92	0.0034016	72	166	23	260
93	0.0030238	74	151	14	228
94	0.0031078	34	118	15	202
95	0.0030893	36	136	16	236
96	0.0031597	13	102	10	191
97	0.0031828	1	135	16	269
98	0.0033734	7	125	15	243
99	0.0029785	5	99	12	193
100	0.0027221	37	142	26	247
101	0.0031267	20	149	26	278
102	0.002902	29	127	28	225
103	0.0031842	56	132	16	208
104	0.0028713	12	112	16	212
105	0.0032794	18	120	12	222
106	0.0032672	32	137	17	242
107	0.0027497	22	153	27	284
108	0.002797	74	152	16	230
109	0.0031495	36	136	18	236
110	0.0029838	11	106	11	201
111	0.0029968	0	107	13	214
112	0.0030826	58	148	19	238
113	0.0031108	15	99	17	183
114	0.0028899	8	96	19	184
115	0.0027136	18	122	23	226
116	0.0032249	16	146	15	276
117	0.0028329	7	126	24	245
118	0.0031409	49	135	15	221
119	0.003018	46	152	25	258
120	0.0032516	84	158	14	232
121	0.0029247	54	139	16	224
122	0.0030253	13	110	16	207
123	0.0026031	15	98	13	181
124	0.0029572	19	101	17	183
125	0.0030416	8	120	15	232
126	0.0031067	9	103	16	197
127	0.0030643	2	101	29	200
128	0.0032308	64	158	16	252
129	0.003101	23	152	20	281
130	0.0032949	23	127	12	231
131	0.0031476	45	130	18	215
132	0.0029571	38	122	16	206
133	0.0029568	17	128	20	239
134	0.0030069	3	108	27	213
135	0.0028538	33	135	14	237
136	0.0030223	11	122	15	233
137	0.0030856	7	129	14	251
138	0.0032817	10	111	12	212
139	0.0030812	103	170	18	237
140	0.0030423	32	140	29	248
141	0.0027727	43	154	29	265
142	0.0031776	83	160	19	237
143	0.0032131	44	138	18	232
144	0.0029245	2	105	15	208
145	0.002897	44	145	16	246
146	0.0030672	10	110	15	210
147	0.0031266	20	103	17	186
148	0.0033049	45	138	20	231
149	0.0030306	18	129	14	240
150	0.0034865	38	126	17	214
151	0.0028624	27	115	19	203
152	0.003453	27	118	17	209
153	0.003148	22	112	12	202
154	0.0029409	42	145	16	248
155	0.0033772	44	142	17	240
156	0.0029725	23	118	15	213
157	0.0037509	23	125	19	227
158	0.0030245	27	135	26	243
159	0.0031267	20	131	17	242
160	0.0031187	31	125	13	219
161	0.0030022	88	140	13	192
162	0.002959	14	113	14	212
163	0.0029255	7	137	25	267
164	0.0029618	2	95	19	188
165	0.0030291	23	118	22	213
166	0.0031276	29	148	15	267
167	0.0030434	40	107	13	174
168	0.0028692	32	160	26	288
169	0.0030443	42	139	12	236
170	0.0030876	13	123	18	233
171	0.0033614	7	116	20	225
172	0.0029709	14	128	26	242
173	0.0028554	108	187	19	266
174	0.003266	86	157	19	228
175	0.0027567	21	122	15	223
176	0.0032748	15	109	13	203
177	0.0032728	42	135	15	228
178	0.0028979	3	121	25	239
179	0.0039812	32	136	14	240
180	0.0032376	99	182	23	265
181	0.0031376	30	135	15	240
182	0.0032398	18	110	12	202
183	0.0031399	4	118	16	232
184	0.0029456	54	134	17	214
185	0.0033345	6	118	16	230
186	0.0033611	65	143	16	221
187	0.0030891	0	110	14	220
188	0.0028896	33	135	16	237
189	0.0030892	102	162	18	222
190	0.0030733	2	112	17	222
191	0.0031391	41	138	14	235
192	0.0030874	23	118	17	213
193	0.0033116	32	144	25	256
194	0.003102	42	134	12	226
195	0.002645	22	124	19	226
196	0.0029878	45	143	24	241
197	0.003193	31	124	20	217
198	0.0029054	15	120	22	225
199	0.0030269	28	140	22	252
200	0.00297	31	113	12	195
201	0.0032059	15	120	17	225
202	0.0030117	54	175	28	296
203	0.003266	0	121	16	242
204	0.0033859	69	142	14	215
205	0.0032466	15	108	17	201
206	0.0032191	22	122	12	222
207	0.0028508	46	148	17	250
208	0.0029513	13	105	12	197
209	0.0031403	6	106	11	206
210	0.0029726	23	112	18	201
211	0.0032774	53	150	15	247
212	0.0029789	53	149	17	245
213	0.003277	42	122	20	202
214	0.0034139	22	130	13	238
215	0.0031389	2	104	14	206
216	0.0032425	33	134	17	235
217	0.0028825	121	180	21	239
218	0.0031942	36	122	15	208
219	0.0027782	30	136	15	242
220	0.002691	67	147	23	227
221	0.0029751	9	122	16	235
222	0.0029154	40	131	21	222
223	0.0032065	32	143	16	254
224	0.0031165	4	128	16	252
225	0.0032512	58	145	14	232
226	0.0033583	30	128	10	226
227	0.003085	39	122	17	205
228	0.0030515	14	113	18	212
229	0.0029894	86	163	19	240
230	0.0030688	37	130	13	223
231	0.0033618	87	156	13	225
232	0.0030649	18	163	25	308
233	0.0027936	137	205	26	273
234	0.0030314	17	126	15	235
235	0.0029048	40	138	16	236
236	0.0030811	10	99	15	188
237	0.0030043	12	118	13	224
238	0.003339	65	133	17	201
239	0.0031242	45	120	13	195
240	0.0030692	4	139	27	274
241	0.0029722	40	132	16	224
242	0.0030301	3	100	15	197
243	0.0031574	21	141	13	261
244	0.00323	46	149	15	252
245	0.0038457	73	159	13	245
246	0.0029601	32	133	13	234
247	0.0032636	1	118	14	235
248	0.0030124	2	126	16	250
249	0.0030943	13	115	18	217
250	0.0030119	33	131	19	229
251	0.0033065	19	114	15	209
252	0.0029431	66	133	15	200
253	0.0033582	7	106	14	205
254	0.0031643	2	130	14	258
255	0.0026262	48	146	28	244
256	0.0027432	24	127	29	230
257	0.0026888	39	147	23	255
258	0.0029532	36	117	18	198
259	0.0032268	15	115	16	215
260	0.0032145	23	128	16	233
261	0.0030172	56	141	16	226
262	0.0031716	59	135	11	211
263	0.0029875	12	121	18	230
264	0.0031434	5	106	14	207
265	0.0029948	35	151	24	267
266	0.0029744	34	123	18	212
267	0.0030989	13	115	18	217
268	0.0032915	21	139	15	257
269	0.0031527	15	141	13	267
270	0.0034069	20	133	12	246
271	0.0031484	9	119	16	229
272	0.0029879	19	122	27	225
273	0.0032123	45	135	17	225
274	0.0033331	77	148	14	219
275	0.0028134	43	145	28	247
276	0.0038016	29	135	15	241
277	0.0030476	52	126	13	200
278	0.0029415	23	136	17	249
279	0.0029328	9	134	26	259
280	0.002874	75	167	22	259
281	0.0027379	24	139	25	254
282	0.0028693	20	118	22	216
283	0.0030386	23	117	13	211
284	0.0029902	45	119	12	193
285	0.0029938	41	131	19	221
286	0.0032865	4	123	14	242
287	0.0031341	55	129	17	203
288	0.0026844	78	167	17	256
289	0.0031756	12	112	14	212
290	0.003072	36	135	14	234
291	0.0028401	113	173	16	233
292	0.0029442	14	104	14	194
293	0.0028615	52	149	18	246
294	0.0029684	1	113	15	225
295	0.0031698	32	136	16	240
296	0.0030414	27	99	13	171
297	0.0031171	5	138	29	271
298	0.0032643	9	129	14	249
299	0.0031447	5	145	22	285
300	0.0030512	15	119	13	223
301	0.0032294	4	105	12	206
302	0.0031322	47	114	20	181
303	0.00299	21	120	13	219
304	0.0032568	41	114	16	187
305	0.0028182	16	126	24	236
306	0.0028557	125	203	18	281
307	0.0030102	36	156	29	276
308	0.002857	87	148	12	209
309	0.0034235	11	129	17	247
310	0.0034157	45	135	18	225
311	0.0030283	36	123	12	210
312	0.0030674	14	111	16	208
313	0.0030385	18	126	14	234
314	0.003246	49	157	16	265
315	0.0026175	12	111	26	210
316	0.0031893	33	119	14	205
317	0.0029666	41	135	29	229
318	0.0034456	28	127	18	226
319	0.0031957	13	120	17	227
320	0.0030629	33	124	15	215
321	0.0031126	47	139	15	231
322	0.0036436	57	146	19	235
323	0.0030564	58	146	16	234
324	0.0029924	25	133	15	241
325	0.0027584	115	185	21	255
326	0.002716	108	175	20	242
327	0.0031791	51	130	13	209
328	0.0030704	13	111	15	209
329	0.0032366	49	116	17	183
330	0.0032701	82	141	14	200
331	0.0030944	6	126	15	246
332	0.0032129	34	138	17	242
333	0.0033598	23	124	14	225
334	0.0030222	98	177	22	256
335	0.0033565	35	151	14	267
336	0.0030931	56	164	22	272
337	0.0029563	42	126	11	210
338	0.0032053	20	129	25	238
339	0.003176	25	133	13	241
340	0.0030157	31	121	18	211
341	0.0032427	19	131	19	243
342	0.0031248	1	100	13	199
343	0.003023	88	150	19	212
344	0.0026373	19	114	16	209
345	0.0031429	5	129	19	253
346	0.003036	47	143	19	239
347	0.0028824	6	121	18	236
348	0.0029847	30	131	16	232
349	0.0030461	14	97	13	180
350	0.0028234	47	148	26	249
351	0.0027802	43	119	16	195
352	0.0030751	7	123	23	239
353	0.0029485	41	137	12	233
354	0.0030632	5	116	15	227
355	0.0033027	50	133	15	216
356	0.0031317	9	128	18	247
357	0.0032065	23	134	19	245
358	0.002816	43	129	21	215
359	0.0031487	29	126	23	223
360	0.0029539	33	136	27	239
361	0.0030061	87	147	19	207
362	0.0028121	21	134	17	247
363	0.0032843	22	121	14	220
364	0.0029742	24	138	22	252
365	0.0034479	10	123	18	236
366	0.0031831	65	141	14	217
367	0.0030665	1	116	19	231
368	0.0033874	1	114	16	227
369	0.0029531	3	110	15	217
370	0.0034276	75	137	11	199
371	0.0028958	28	109	15	190
372	0.0030307	6	106	15	206
373	0.0029873	65	143	14	221
374	0.0029328	20	134	19	248
375	0.0032004	17	112	15	207
376	0.0026303	69	130	17	191
377	0.0030169	11	115	15	219
378	0.0031239	1	114	13	227
379	0.003028	70	148	16	226
380	0.0031246	2	114	18	226
381	0.0028953	9	122	16	235
382	0.0030202	41	122	14	203
383	0.0029103	65	153	15	241
384	0.0032396	58	157	14	256
385	0.0033944	41	132	16	223
386	0.0031299	16	126	22	236
387	0.003106	41	133	22	225
388	0.0028941	68	146	18	224
389	0.0029677	66	151	26	236
390	0.0032062	128	189	21	250
391	0.0035018	1	122	16	243
392	0.0031079	32	126	15	220
393	0.0028922	49	147	13	245
394	0.0033227	1	107	12	213
395	0.0031107	3	113	15	223
396	0.0029187	76	143	15	210
397	0.0030124	50	123	13	196
398	0.003208	83	138	14	193
399	0.0035063	25	119	29	213
400	0.003067	16	109	16	202
401	0.0029809	2	122	28	242
402	0.003046	21	130	16	239
403	0.002894	25	115	16	205
404	0.0029853	31	137	16	243
405	0.0030213	31	141	29	251
406	0.0030053	40	124	19	208
407	0.0027762	57	167	26	277
408	0.002707	74	141	20	208
409	0.0031202	8	117	12	226
410	0.0032618	50	134	15	218
411	0.0032232	17	105	16	193
412	0.0029456	13	118	13	223
413	0.003064	1	106	14	211
414	0.0029336	19	114	15	209
415	0.0029655	19	116	19	213
416	0.002989	4	133	20	262
417	0.0030805	5	113	13	221
418	0.0031263	15	129	12	243
419	0.0028212	21	122	14	223
420	0.0032325	38	138	15	238
421	0.0032232	4	115	16	226
422	0.0031125	76	149	14	222
423	0.0030274	12	124	13	236
424	0.0033301	17	114	13	211
425	0.0029073	53	145	14	237
426	0.0031574	6	138	17	270
427	0.0030053	66	160	25	254
428	0.003125	60	132	14	204
429	0.0031697	14	124	17	234
430	0.0032159	34	117	15	200
431	0.0031028	16	128	17	240
432	0.0032153	3	93	14	183
433	0.0031071	13	112	17	211
434	0.0029982	49	136	19	223
435	0.0034865	38	130	17	222
436	0.0030505	8	111	13	214
437	0.0032897	17	121	27	225
438	0.0033033	57	132	21	207
439	0.0031218	52	143	18	234
440	0.0033347	14	119	14	224
441	0.0033086	15	111	13	207
442	0.0031201	3	114	11	225
443	0.0033427	9	111	16	213
444	0.0032671	37	126	17	215
445	0.0032287	41	132	21	223
446	0.0030766	29	118	12	207
447	0.0029478	12	129	29	246
448	0.0031281	3	109	15	215
449	0.0031542	2	110	20	218
450	0.0029322	28	121	20	214
451	0.0031473	11	107	18	203
452	0.0029605	45	140	20	235
453	0.0032673	20	121	15	222
454	0.0032166	104	186	15	268
455	0.0031987	31	133	17	235
456	0.002884	6	115	18	224
457	0.0033422	53	140	13	227
458	0.0028234	33	119	21	205
459	0.0029267	5	104	12	203
460	0.0030904	45	141	14	237
461	0.0037373	35	137	15	239
462	0.003464	5	114	26	223
463	0.0031348	7	123	16	239
464	0.0030355	25	133	18	241
465	0.0029906	50	143	18	236
466	0.0030672	20	115	14	210
467	0.0030386	7	109	19	211
468	0.0029245	59	138	15	217
469	0.002673	36	115	13	194
470	0.0032813	42	145	19	248
471	0.0031264	4	121	12	238
472	0.0031407	34	140	15	246
473	0.0031204	48	161	16	274
474	0.0032338	22	117	20	212
475	0.0031361	59	124	12	189
476	0.0032574	13	128	13	243
477	0.0030743	55	146	15	237
478	0.0030084	4	118	23	232
479	0.0030405	41	137	16	233
480	0.0031422	4	123	13	242
481	0.0034008	42	122	19	202
482	0.0030811	14	116	16	218
483	0.0032281	23	133	18	243
484	0.0031602	60	140	20	220
485	0.0031319	55	141	14	227
486	0.0033184	19	118	16	217
487	0.0028566	45	142	22	239
488	0.0027945	19	157	29	295
489	0.0030259	55	165	18	275
490	0.0029729	2	101	13	200
491	0.0029511	17	140	17	263
492	0.0028611	35	135	20	235
493	0.0031264	37	143	16	249
494	0.003133	69	146	15	223
495	0.0031021	11	109	17	207
496	0.0027736	56	154	17	252
497	0.0032418	1	111	17	221
498	0.0032785	18	119	18	220
499	0.0030751	40	111	15	182
500	0.002964	12	112	13	212
501	0.003133	53	123	19	193
502	0.0030701	21	106	19	191
503	0.0029664	51	153	19	255
504	0.0029325	53	113	15	173
505	0.0031851	34	135	20	236
506	0.0032838	38	144	17	250
507	0.00296	32	135	12	238
508	0.0029913	24	135	19	246
509	0.0029965	31	126	15	221
510	0.0029875	39	122	11	205
511	0.0032544	17	117	16	217
512	0.0036009	14	118	15	222
513	0.0031393	6	130	19	254
514	0.0031624	37	122	17	207
515	0.0030329	1	112	20	223
516	0.0029714	32	117	16	202
517	0.0032741	61	153	19	245
518	0.0033399	16	105	11	194
519	0.0031816	9	113	19	217
520	0.0030371	32	124	16	216
521	0.0030032	43	120	13	197
522	0.0031798	19	121	14	223
523	0.0028684	3	111	16	219
524	0.0031298	18	125	13	232
525	0.0028505	14	119	15	224
526	0.0030226	53	131	13	209
527	0.0027312	13	112	19	211
528	0.0030765	11	141	25	271
529	0.003039	9	127	16	245
530	0.002956	33	122	20	211
531	0.0030714	0	124	18	248
532	0.0029069	60	160	29	260
533	0.003197	9	104	15	199
534	0.0032979	2	126	16	250
535	0.0028721	7	121	16	235
536	0.0029346	18	115	15	212
537	0.0033585	42	135	13	228
538	0.0030491	54	166	28	278
539	0.0029427	25	139	17	253
540	0.0029404	21	123	22	225
541	0.0033294	5	144	16	283
542	0.002963	25	132	14	239
543	0.003113	16	122	16	228
544	0.0027309	37	140	18	243
545	0.0029005	25	137	27	249
546	0.0030046	95	162	15	229
547	0.0031601	31	122	16	213
548	0.0032364	21	119	18	217
549	0.0032783	3	114	17	225
550	0.0029422	20	127	18	234
551	0.0032814	9	125	16	241
552	0.0030689	30	121	13	212
553	0.0030699	12	102	15	192
554	0.0030518	13	138	16	263
555	0.0030953	55	129	24	203
556	0.003044	53	142	14	231
557	0.0029896	3	103	14	203
558	0.003135	33	157	16	281
559	0.0031843	21	110	15	199
560	0.0027319	12	138	18	264
561	0.0030758	10	106	12	202
562	0.0034489	8	143	16	278
563	0.0031425	18	98	13	178
564	0.0031571	31	134	19	237
565	0.0030925	7	109	15	211
566	0.0030185	6	118	16	230
567	0.003099	35	117	17	199
568	0.0029364	46	145	25	244
569	0.0030506	8	107	11	206
570	0.003121	7	122	23	237
571	0.0031305	50	157	20	264
572	0.0029635	92	177	15	262
573	0.0029343	82	176	27	270
574	0.0031196	75	144	14	213
575	0.0030909	42	143	28	244
576	0.0027201	74	155	18	236
577	0.0029377	31	120	19	209
578	0.0031679	3	128	16	253
579	0.0031095	48	154	25	260
580	0.0029176	7	123	26	239
581	0.0030788	58	150	21	242
582	0.0027917	42	139	23	236
583	0.0032246	9	108	17	207
584	0.00303	42	158	21	274
585	0.0030283	13	116	17	219
586	0.0032135	0	132	21	264
587	0.0033718	2	117	16	232
588	0.0031087	1	142	28	283
589	0.0030845	24	106	14	188
590	0.0030936	38	142	17	246
591	0.0032556	2	123	14	244
592	0.0031624	49	143	18	237
593	0.0028512	45	133	18	221
594	0.0032531	51	136	19	221
595	0.0033501	61	148	19	235
596	0.0030746	36	119	14	202
597	0.0033305	5	112	13	219
598	0.0031824	58	134	14	210
599	0.0031442	3	118	18	233
600	0.0030076	23	116	16	209
601	0.003074	4	114	13	224
602	0.0032267	16	140	29	264
603	0.0029575	64	155	17	246
604	0.0035688	65	137	15	209
605	0.0029019	14	114	17	214
606	0.0031099	46	116	16	186
607	0.0031471	40	138	16	236
608	0.0028869	15	102	15	189
609	0.0030918	16	119	16	222
610	0.0031513	79	160	14	241
611	0.0029815	12	144	24	276
612	0.003454	71	166	23	261
613	0.0030347	35	120	14	205
614	0.0030573	17	153	27	289
615	0.0031026	25	121	14	217
616	0.0032544	86	142	16	198
617	0.0030641	25	117	16	209
618	0.0030818	19	128	25	237
619	0.0033301	10	128	14	246
620	0.0029707	16	142	19	268
621	0.0029482	8	123	24	238
622	0.0028633	73	137	17	201
623	0.0033084	18	123	15	228
624	0.0029933	23	131	17	239
625	0.0030078	65	147	14	229
626	0.0030539	12	121	15	230
627	0.0032237	4	120	14	236
628	0.003118	56	152	15	248
629	0.0031243	58	154	14	250
630	0.0033574	12	124	14	236
631	0.0028378	42	119	15	196
632	0.0030314	48	131	24	214
633	0.0038729	6	123	15	240
634	0.0030882	27	107	11	187
635	0.0028743	132	191	19	250
636	0.0032268	18	147	26	276
637	0.003324	64	156	14	248
638	0.0031056	68	142	19	216
639	0.0026306	4	126	24	248
640	0.0031105	4	105	12	206
641	0.0035876	41	144	15	247
642	0.0029696	10	140	26	270
643	0.003251	23	136	15	249
644	0.0029641	7	98	15	189
645	0.0032962	3	119	18	235
646	0.0031746	29	113	16	197
647	0.0030408	8	119	25	230
648	0.0030246	11	112	17	213
649	0.002935	25	122	21	219
650	0.0026952	6	114	15	222
651	0.0030701	17	130	14	243
652	0.0030538	81	177	29	273
653	0.0033574	11	110	11	209
654	0.0030617	52	150	16	248
655	0.0030683	54	145	23	236
656	0.0029727	8	116	21	224
657	0.0029933	4	115	20	226
658	0.0031861	56	128	10	200
659	0.0034408	20	123	17	226
660	0.0032667	2	119	14	236
661	0.0028989	6	107	14	208
662	0.0030699	27	136	22	245
663	0.0030636	64	149	19	234
664	0.0032379	62	156	16	250
665	0.0032013	73	155	17	237
666	0.0030722	2	119	12	236
667	0.003372	5	117	19	229
668	0.0033406	37	133	15	229
669	0.0028577	30	133	16	236
670	0.0027902	22	135	18	248
671	0.0027394	10	144	28	278
672	0.0031997	55	156	15	257
673	0.0029331	104	190	25	276
674	0.0030193	9	130	16	251
675	0.0028743	35	148	29	261
676	0.0030416	110	172	17	234
677	0.0031516	31	133	17	235
678	0.003256	15	128	26	241
679	0.0028401	58	144	18	230
680	0.0028955	71	139	16	207
681	0.0029068	6	119	23	232
682	0.0031464	18	128	17	238
683	0.0031264	62	125	17	188
684	0.0031493	18	109	13	200
685	0.0030459	33	152	21	271
686	0.0028321	104	160	18	216
687	0.0034222	21	145	19	269
688	0.0030343	14	94	18	174
689	0.0031041	35	135	16	235
690	0.0026577	108	187	24	266
691	0.0028183	59	137	15	215
692	0.0032721	15	104	16	193
693	0.0030534	24	118	15	212
694	0.0029072	15	109	13	203
695	0.0030521	23	124	12	225
696	0.0031556	72	135	18	198
697	0.0031333	12	131	26	250
698	0.0027375	41	146	23	251
699	0.0031378	34	137	15	240
700	0.0034794	24	116	11	208
701	0.002914	21	146	29	271
702	0.0033823	39	131	19	223
703	0.0027571	45	147	15	249
704	0.0031467	17	123	15	229
705	0.0026629	57	156	20	255
706	0.0029914	38	134	15	230
707	0.0031254	74	163	19	252
708	0.0030538	38	156	19	274
709	0.0032772	10	118	14	226
710	0.0030834	67	143	14	219
711	0.0032389	15	122	15	229
712	0.0035354	67	148	15	229
713	0.0030519	54	140	21	226
714	0.002861	18	137	15	256
715	0.0029843	15	103	15	191
716	0.0029883	7	101	16	195
717	0.0029931	14	115	13	216
718	0.0031108	51	145	18	239
719	0.0028166	11	109	13	207
720	0.0030867	45	124	16	203
721	0.0027738	20	125	14	230
722	0.0030221	12	121	13	230
723	0.0030364	12	118	19	224
724	0.0033193	43	147	15	251
725	0.0030082	10	122	25	234
726	0.0030889	56	139	24	222
727	0.0032242	29	152	25	275
728	0.0029452	13	128	18	243
729	0.0029734	54	142	15	230
730	0.0031103	14	121	16	228
731	0.002925	34	116	18	198
732	0.0031621	6	129	15	252
733	0.0031738	1	139	15	277
734	0.0028401	8	105	16	202
735	0.0030355	2	123	14	244
736	0.0028946	93	171	28	249
737	0.0032615	55	151	16	247
738	0.0032059	8	129	18	250
739	0.0028875	74	152	19	230
740	0.0030743	21	125	15	229
741	0.0032367	18	125	22	232
742	0.0030506	63	146	18	229
743	0.0029245	82	169	22	256
744	0.0030271	33	100	15	167
745	0.0033343	12	112	19	212
746	0.0036122	32	135	18	238
747	0.0030308	59	142	15	225
748	0.0032816	22	125	15	228
749	0.0029794	5	124	17	243
750	0.0032266	80	142	16	204
751	0.0029698	33	130	14	227
752	0.0031245	2	116	16	230
753	0.0031072	0	121	18	242
754	0.003034	43	136	15	229
755	0.0028213	35	139	17	243
756	0.0027586	40	132	20	224
757	0.0028387	72	146	20	220
758	0.0028689	103	160	16	217
759	0.0033503	6	112	12	218
760	0.003128	66	133	14	200
761	0.0028042	3	120	14	237
762	0.0030077	49	146	24	243
763	0.0031844	2	136	16	270
764	0.0032268	62	150	14	238
765	0.0030084	43	133	17	223
766	0.0031696	3	128	15	253
767	0.0031109	55	148	16	241
768	0.0031698	11	119	15	227
769	0.0028831	68	137	17	206
770	0.0031922	44	143	16	242
771	0.0030545	59	148	16	237
772	0.0030362	29	128	16	227
773	0.0039251	64	137	13	210
774	0.0034154	48	131	17	214
775	0.0031022	3	114	17	225
776	0.003231	9	95	13	181
777	0.0032385	1	111	12	221
778	0.0027301	33	136	22	239
779	0.003336	6	116	13	226
780	0.0032337	40	126	12	212
781	0.0030095	23	147	17	271
782	0.0031451	60	150	18	240
783	0.0031288	44	133	25	222
784	0.0028738	42	145	25	248
785	0.0030376	5	133	17	261
786	0.0029474	3	121	14	239
787	0.0029131	114	201	29	288
788	0.0027647	78	161	21	244
789	0.0030502	26	129	13	232
790	0.0028763	35	145	25	255
791	0.0031012	22	129	18	236
792	0.0029662	17	122	15	227
793	0.0034261	17	123	18	229
794	0.0031944	4	109	17	214
795	0.0030015	17	98	13	179
796	0.0031401	32	150	18	268
797	0.0030639	2	109	14	216
798	0.0032447	33	125	14	217
799	0.0028072	45	156	29	267
800	0.0028333	42	159	26	276
801	0.0031565	33	144	14	255
802	0.0031901	41	131	21	221
803	0.0032265	81	154	16	227
804	0.0028891	92	154	21	216
805	0.0026762	28	126	23	224
806	0.0031906	48	160	14	272
807	0.0030126	21	112	13	203
808	0.0030933	47	136	15	225
809	0.0028964	39	140	13	241
810	0.0027312	35	165	29	295
811	0.0027421	4	126	19	248
812	0.0033985	1	129	14	257
813	0.0030071	53	145	17	237
814	0.0029828	7	116	13	225
815	0.0027824	83	169	17	255
816	0.003243	15	125	20	235
817	0.0027518	21	119	15	217
818	0.0031977	22	113	16	204
819	0.0026989	22	142	28	262
820	0.0031614	68	136	17	204
821	0.0030065	15	118	15	221
822	0.0026278	14	101	12	188
823	0.0035019	24	136	17	248
824	0.0034729	66	170	26	274
825	0.0037133	58	142	11	226
826	0.003254	12	108	13	204
827	0.0030865	12	107	13	202
828	0.0031421	73	140	18	207
829	0.0030123	24	128	13	232
830	0.0031311	42	112	13	182
831	0.0028661	25	141	18	257
832	0.0030792	68	139	11	210
833	0.0029326	2	115	16	228
834	0.0031645	6	109	12	212
835	0.0033236	70	168	18	266
836	0.0029336	24	104	13	184
837	0.0030997	12	113	16	214
838	0.0031991	12	143	27	274
839	0.0029205	20	131	24	242
840	0.0030153	52	125	13	198
841	0.0030071	15	108	15	201
842	0.0027781	32	112	14	192
843	0.0030626	66	143	15	220
844	0.0030696	40	147	14	254
845	0.0033174	39	132	14	225
846	0.0030205	33	121	17	209
847	0.0031188	52	137	13	222
848	0.0029323	41	129	16	217
849	0.0031821	5	111	14	217
850	0.0030732	1	114	14	227
851	0.0031981	22	128	16	234
852	0.0027099	60	170	27	280
853	0.0032726	9	117	15	225
854	0.0031708	57	135	18	213
855	0.003244	10	112	12	214
856	0.0033889	34	131	16	228
857	0.0030123	25	110	14	195
858	0.0027416	6	128	20	250
859	0.0033628	59	140	14	221
860	0.0028611	18	125	18	232
861	0.0031224	61	160	25	259
862	0.0029656	65	143	20	221
863	0.0029357	62	136	15	210
864	0.0029034	53	145	21	237
865	0.0031115	45	126	13	207
866	0.0032258	20	126	14	232
867	0.0031623	28	130	20	232
868	0.0027839	32	146	15	260
869	0.0031322	52	131	14	210
870	0.002654	5	116	15	227
871	0.0027933	15	125	14	235
872	0.0027096	16	126	17	236
873	0.003055	2	119	17	236
874	0.0030599	6	109	19	212
875	0.0030982	8	112	15	216
876	0.0031709	26	139	19	252
877	0.0031528	34	148	25	262
878	0.0031511	5	118	14	231
879	0.0031539	40	145	18	250
880	0.0030879	3	129	14	255
881	0.0030641	5	131	20	257
882	0.0032097	11	116	15	221
883	0.0030243	4	136	27	268
884	0.0030479	19	124	14	229
885	0.0029995	47	122	16	197
886	0.0029586	0	110	15	220
887	0.0030702	3	118	18	233
888	0.0029519	56	144	26	232
889	0.0032682	23	134	17	245
890	0.0029768	22	121	21	220
891	0.0032447	10	122	15	234
892	0.0032723	10	114	23	218
893	0.002652	32	147	28	262
894	0.0030504	83	165	23	247
895	0.0032965	43	143	12	243
896	0.0028059	63	160	19	257
897	0.0030582	19	121	18	223
898	0.0028046	0	98	12	196
899	0.0031744	40	143	18	246
900	0.0032218	28	122	14	216
901	0.0031685	41	123	14	205
902	0.0032278	21	142	20	263
903	0.0032026	35	142	14	249
904	0.0031545	23	124	16	225
905	0.0032372	15	111	15	207
906	0.0029397	22	136	14	250
907	0.0031544	51	139	17	227
908	0.0029538	14	105	12	196
909	0.003217	12	107	14	202
910	0.0032749	4	114	15	224
911	0.0033371	11	128	17	245
912	0.0026558	2	132	16	262
913	0.0030415	43	160	16	277
914	0.0030847	13	125	28	237
915	0.0031324	45	142	23	239
916	0.0030073	8	113	16	218
917	0.0029337	24	150	19	276
918	0.0031313	21	135	17	249
919	0.0029286	40	158	25	276
920	0.0031781	8	120	13	232
921	0.0030598	1	110	18	219
922	0.0031287	43	137	15	231
923	0.0031531	29	121	19	213
924	0.0030706	28	121	22	214
925	0.0031702	3	111	12	219
926	0.0031196	11	110	15	209
927	0.0030511	75	164	22	253
928	0.0032107	37	120	16	203
929	0.0032025	16	157	21	298
930	0.0032714	23	144	20	265
931	0.0030534	56	137	14	218
932	0.003004	58	132	17	206
933	0.0032553	0	102	12	204
934	0.0029978	66	139	15	212
935	0.0032458	53	145	19	237
936	0.0030124	53	143	19	233
937	0.0030205	14	124	25	234
938	0.0029465	32	115	16	198
939	0.0030677	2	125	19	248
940	0.0033464	12	120	17	228
941	0.0031178	20	134	16	248
942	0.0030782	7	117	19	227
943	0.0031498	20	121	16	222
944	0.0033236	44	126	15	208
945	0.0030586	7	109	13	211
946	0.0031451	50	131	13	212
947	0.0028134	14	117	12	220
948	0.0037086	5	106	15	207
949	0.0031537	5	113	16	221
950	0.0029665	17	115	12	213
951	0.0031393	88	141	19	194
952	0.0028918	9	102	14	195
953	0.0033649	29	109	16	189
954	0.0032779	19	111	13	203
955	0.0029118	77	185	28	293
956	0.0035004	37	127	13	217
957	0.0030191	37	121	28	205
958	0.0031356	24	108	12	192
959	0.0028686	37	148	22	259
960	0.0030889	17	123	15	229
961	0.0031817	43	132	15	221
962	0.002989	53	151	17	249
963	0.0034749	28	121	14	214
964	0.0031897	73	138	16	203
965	0.0031533	19	136	13	253
966	0.0027759	33	127	16	221
967	0.0028598	62	153	21	244
968	0.0028869	52	138	29	224
969	0.0030882	12	119	24	226
970	0.0028424	84	174	23	264
971	0.0026628	38	148	26	258
972	0.0030784	55	161	21	267
973	0.0030784	5	122	14	239
974	0.0028424	32	131	28	230
975	0.0031017	55	152	13	249
976	0.0033499	38	124	15	210
977	0.0032213	103	170	19	237
978	0.002963	27	127	19	227
979	0.0032646	7	134	15	261
980	0.0031562	30	123	13	216
981	0.0031283	3	110	13	217
982	0.0029922	51	129	13	207
983	0.0029365	29	120	12	211
984	0.003179	50	131	24	212
985	0.0026849	62	174	18	286
986	0.0028063	21	124	17	227
987	0.0031635	6	116	16	226
988	0.0030925	10	143	26	276
989	0.0035515	35	139	17	243
990	0.0026902	19	128	16	237
991	0.0031275	28	125	17	222
992	0.0032341	73	151	23	229
993	0.0032115	16	143	25	270
994	0.0030667	11	119	24	227
995	0.0030425	2	97	15	192
996	0.0031784	43	136	12	229
997	0.0030768	38	126	12	214
998	0.0029461	68	163	16	258
999	0.0030954	91	150	13	209
mean	0.00308333	31.944	130.792	17.408	229.64

## Sheet: DACC_D
	time	SEq	Bal	Reg	Egal
0	0.0007903	34	145	20	256
1	0.001016	121	196	24	271
2	0.0007597	7	111	14	215
3	0.0007766	21	123	16	225
4	0.0007729	6	124	20	242
5	0.0007045	7	101	16	195
6	0.0007496	24	120	12	216
7	0.0009175	21	124	17	227
8	0.000888	35	138	27	241
9	0.000724	4	118	18	232
10	0.0007612	2	108	19	214
11	0.0007278	1	114	21	227
12	0.0006299	32	109	17	186
13	0.0009108	47	153	19	259
14	0.0007458	52	143	19	234
15	0.0007723	68	154	17	240
16	0.0008816	10	117	20	224
17	0.0009784	25	151	14	277
18	0.0007794	26	130	14	234
19	0.0007773	15	121	14	227
20	0.0008281	20	134	15	248
21	0.0008559	11	127	14	243
22	0.0008	12	139	26	266
23	0.0007387	32	121	18	210
24	0.0007747	33	127	17	221
25	0.0008463	52	130	13	208
26	0.0007513	18	113	13	208
27	0.0007963	42	133	14	224
28	0.0008202	3	116	16	229
29	0.0009223	70	158	18	246
30	0.0006922	85	157	18	229
31	0.0006885	1	117	17	233
32	0.0006472	140	193	28	246
33	0.0007841	7	135	14	263
34	0.0009867	22	150	28	278
35	0.0007995	1	119	17	237
36	0.0006813	34	120	22	206
37	0.0009147	34	139	15	244
38	0.0007207	29	135	15	241
39	0.0007968	41	142	16	243
40	0.0008024	24	150	27	276
41	0.0007506	18	116	18	214
42	0.0009629	58	152	28	246
43	0.0008054	28	121	16	214
44	0.00074	58	140	16	222
45	0.0010041	62	163	21	264
46	0.0008252	71	168	18	265
47	0.0008879	23	118	18	213
48	0.0007845	25	146	13	267
49	0.0007723	32	148	17	264
50	0.0007573	21	138	14	255
51	0.0011026	87	196	28	305
52	0.0007739	51	140	17	229
53	0.000735	19	142	26	265
54	0.0007644	44	140	17	236
55	0.0009476	12	129	26	246
56	0.0007793	10	113	18	216
57	0.0007864	7	105	18	203
58	0.0006965	33	119	16	205
59	0.0009859	152	199	18	246
60	0.0007242	51	135	16	219
61	0.0009	51	137	26	223
62	0.0008666	93	175	18	257
63	0.0007285	48	140	23	232
64	0.0008082	24	149	26	274
65	0.0008379	10	130	18	250
66	0.0007231	48	118	17	188
67	0.0008731	1	115	20	229
68	0.0007899	25	133	17	241
69	0.0008443	27	134	12	241
70	0.0007861	35	134	21	233
71	0.0008591	27	112	14	197
72	0.0007893	68	144	13	220
73	0.0007804	6	117	11	228
74	0.0007659	40	149	17	258
75	0.0007886	23	120	12	217
76	0.0007629	14	136	16	258
77	0.0006394	15	106	17	197
78	0.0008409	11	137	23	263
79	0.0006912	55	131	16	207
80	0.0007604	11	118	16	225
81	0.0008763	136	192	19	248
82	0.0008232	12	163	27	314
83	0.0008115	15	117	14	219
84	0.0006987	28	120	17	212
85	0.0006437	7	104	14	201
86	0.0007451	43	131	15	219
87	0.0006936	145	200	16	255
88	0.0006804	40	138	20	236
89	0.0007529	47	123	19	199
90	0.000928	67	160	19	253
91	0.0007788	36	150	28	264
92	0.0008707	72	166	23	260
93	0.0007769	74	151	14	228
94	0.0007729	43	132	19	221
95	0.000907	4	125	16	246
96	0.000669	13	102	10	191
97	0.0007953	1	135	16	269
98	0.00085	1	122	15	243
99	0.0007381	29	113	12	197
100	0.0008554	37	142	26	247
101	0.000836	20	149	26	278
102	0.0007906	29	127	28	225
103	0.0008185	33	128	24	223
104	0.0007415	12	112	16	212
105	0.0007577	18	120	12	222
106	0.0007945	32	137	17	242
107	0.0009187	22	153	27	284
108	0.0008957	74	152	16	230
109	0.0009222	36	136	18	236
110	0.0008127	11	106	11	201
111	0.0007113	0	107	13	214
112	0.0007528	58	148	19	238
113	0.0006825	15	99	17	183
114	0.0007667	41	119	19	197
115	0.0007527	18	122	23	226
116	0.0008537	16	146	15	276
117	0.0007418	7	126	24	245
118	0.0007437	102	160	21	218
119	0.0008958	6	134	25	262
120	0.0007439	84	158	14	232
121	0.00077	24	125	16	226
122	0.0007274	13	110	16	207
123	0.0006875	15	98	13	181
124	0.0007289	19	101	17	183
125	0.0007175	38	135	17	232
126	0.0008033	9	103	16	197
127	0.0008514	2	101	29	200
128	0.0008562	19	140	16	261
129	0.0008878	23	152	20	281
130	0.0008209	23	127	12	231
131	0.0008118	21	123	29	225
132	0.0007884	38	122	16	206
133	0.0008597	33	133	20	233
134	0.0007939	9	114	27	219
135	0.0009114	33	135	14	237
136	0.0007473	11	122	15	233
137	0.000799	53	158	23	263
138	0.0006899	10	111	12	212
139	0.000872	57	154	18	251
140	0.0008122	2	125	29	248
141	0.0009015	43	154	29	265
142	0.0007046	83	160	19	237
143	0.0008537	44	138	18	232
144	0.0006936	18	112	15	206
145	0.0008151	6	130	23	254
146	0.0009154	44	132	18	220
147	0.0007125	8	99	17	190
148	0.0008643	43	146	15	249
149	0.0007514	18	129	14	240
150	0.0008334	14	118	17	222
151	0.0006427	27	115	19	203
152	0.0007081	54	133	14	212
153	0.0006572	21	116	18	211
154	0.0008193	15	135	16	255
155	0.0008629	44	142	17	240
156	0.0007032	23	118	15	213
157	0.0008096	20	132	14	244
158	0.0008124	27	135	26	243
159	0.0008291	3	122	18	241
160	0.0007489	11	118	19	225
161	0.0008863	27	116	15	205
162	0.0007395	14	113	14	212
163	0.0008498	7	137	25	267
164	0.0008045	87	153	20	219
165	0.0007944	23	118	22	213
166	0.0009356	73	171	18	269
167	0.0008174	40	107	13	174
168	0.000971	32	160	26	288
169	0.000865	4	123	13	242
170	0.0008272	13	123	18	233
171	0.0008746	113	182	20	251
172	0.00084	14	128	26	242
173	0.0009867	108	187	19	266
174	0.0008622	68	167	14	266
175	0.000697	21	122	15	223
176	0.0009652	113	183	17	253
177	0.0008124	42	135	15	228
178	0.000859	29	134	25	239
179	0.0009625	32	136	14	240
180	0.0008436	20	146	23	272
181	0.0008619	30	135	15	240
182	0.0007298	18	110	12	202
183	0.0009244	87	172	26	257
184	0.0009279	54	134	17	214
185	0.0007752	81	161	16	241
186	0.000575	108	172	17	236
187	0.0007785	0	110	14	220
188	0.0008765	33	135	16	237
189	0.0007111	102	162	18	222
190	0.0008046	2	112	17	222
191	0.0007597	7	121	14	235
192	0.000772	9	117	17	225
193	0.0008004	15	140	24	265
194	0.0008472	64	145	13	226
195	0.0008381	22	124	19	226
196	0.0008745	45	143	24	241
197	0.0008461	64	153	27	242
198	0.0008479	15	120	22	225
199	0.0008661	28	140	22	252
200	0.0008207	38	128	25	218
201	0.0008957	15	120	17	225
202	0.000971	54	175	28	296
203	0.0007045	0	121	16	242
204	0.0007157	18	119	15	220
205	0.0005862	15	108	17	201
206	0.0009255	26	127	16	228
207	0.0009627	36	144	17	252
208	0.0008869	17	111	16	205
209	0.0006838	21	111	11	201
210	0.0008355	23	112	18	201
211	0.000794	53	150	15	247
212	0.0009382	32	140	17	248
213	0.0008551	9	108	20	207
214	0.0007316	1	122	13	243
215	0.0007621	2	104	14	206
216	0.0008994	8	127	20	246
217	0.0011556	121	180	21	239
218	0.0008113	36	122	15	208
219	0.0007925	30	136	15	242
220	0.0006926	67	147	23	227
221	0.0007689	9	122	16	235
222	0.0007663	9	118	21	227
223	0.0008593	32	143	16	254
224	0.000659	26	141	17	256
225	0.0007836	14	132	28	250
226	0.0008231	118	192	19	266
227	0.0009553	24	124	17	224
228	0.0006988	14	113	18	212
229	0.0009458	34	139	19	244
230	0.0009244	37	130	13	223
231	0.0007905	15	133	16	251
232	0.0008953	18	163	25	308
233	0.000988	137	205	26	273
234	0.0009196	4	123	15	242
235	0.0007683	71	154	16	237
236	0.0007478	10	99	15	188
237	0.0006858	36	132	11	228
238	0.0006981	4	105	17	206
239	0.0008553	45	120	13	195
240	0.0009015	4	139	27	274
241	0.0006837	16	122	16	228
242	0.0006714	3	100	15	197
243	0.000838	58	148	15	238
244	0.0008576	27	146	15	265
245	0.0007881	73	159	13	245
246	0.0008082	32	133	13	234
247	0.0009246	1	118	14	235
248	0.0008207	19	132	16	245
249	0.0008917	13	115	18	217
250	0.0007729	33	131	19	229
251	0.0007579	39	130	16	221
252	0.0007976	66	133	15	200
253	0.0006562	7	106	14	205
254	0.0009052	2	130	14	258
255	0.0008196	48	146	28	244
256	0.000873	24	127	29	230
257	0.0008625	39	147	23	255
258	0.000717	36	117	18	198
259	0.000738	3	109	16	215
260	0.0009526	42	143	28	244
261	0.0007206	81	156	26	231
262	0.0007875	18	116	11	214
263	0.0007706	12	121	18	230
264	0.0008108	5	106	14	207
265	0.0008824	35	151	24	267
266	0.0008335	34	123	18	212
267	0.0006885	13	115	18	217
268	0.0007966	21	139	15	257
269	0.0007703	4	133	14	262
270	0.0008123	20	133	12	246
271	0.0007703	28	149	19	270
272	0.0008376	19	122	27	225
273	0.0007957	45	145	17	245
274	0.0007717	31	126	15	221
275	0.0012543	43	145	28	247
276	0.0007618	29	135	15	241
277	0.0008021	28	119	13	210
278	0.0010487	23	136	17	249
279	0.0008613	37	147	26	257
280	0.0007666	33	149	22	265
281	0.0009004	24	139	25	254
282	0.0009016	20	118	22	216
283	0.0007579	23	117	13	211
284	0.0007413	2	104	20	206
285	0.0007595	3	114	13	225
286	0.000855	4	123	14	242
287	0.0008709	23	117	17	211
288	0.0007146	78	167	17	256
289	0.0007905	12	112	14	212
290	0.0007607	36	135	14	234
291	0.000966	113	173	16	233
292	0.0007768	14	104	14	194
293	0.0006984	52	149	18	246
294	0.0007579	1	113	15	225
295	0.0007823	32	136	16	240
296	0.0007953	31	109	20	187
297	0.0008546	5	138	29	271
298	0.0007832	30	144	14	258
299	0.0008418	5	145	22	285
300	0.0007054	15	119	13	223
301	0.0007443	4	105	12	206
302	0.0006202	21	102	20	183
303	0.0007644	21	120	13	219
304	0.0007001	31	111	16	191
305	0.0008125	16	126	24	236
306	0.0011144	125	203	18	281
307	0.0008979	36	156	29	276
308	0.0008457	49	129	21	209
309	0.0008376	18	134	16	250
310	0.0008368	37	132	26	227
311	0.0010188	36	123	12	210
312	0.0007041	14	111	16	208
313	0.000923	18	126	14	234
314	0.0008671	49	157	22	265
315	0.0007429	12	111	26	210
316	0.0008038	62	138	16	214
317	0.0007124	41	135	29	229
318	0.0007715	3	116	18	229
319	0.0007447	20	126	15	232
320	0.0007958	33	124	15	215
321	0.0009013	72	152	15	232
322	0.0008651	57	146	19	235
323	0.0008386	58	146	16	234
324	0.0008565	25	133	15	241
325	0.0009172	115	185	21	255
326	0.0008881	108	175	20	242
327	0.0007645	5	107	19	209
328	0.0007187	3	109	15	215
329	0.0007074	49	116	17	183
330	0.0009611	42	135	27	228
331	0.0008602	6	126	15	246
332	0.0007919	1	128	17	255
333	0.0008288	73	157	15	241
334	0.0008083	98	177	22	256
335	0.0008181	35	151	14	267
336	0.0008299	56	164	22	272
337	0.0008215	42	126	11	210
338	0.0009334	30	139	25	248
339	0.0007632	47	149	15	251
340	0.0008287	0	109	26	218
341	0.0009964	69	157	18	245
342	0.0007703	57	128	15	199
343	0.0007751	73	143	19	213
344	0.0008194	19	114	16	209
345	0.0008186	5	129	19	253
346	0.0007977	62	153	23	244
347	0.0007531	6	121	18	236
348	0.0007673	7	120	21	233
349	0.0006847	8	97	15	186
350	0.0007993	47	148	26	249
351	0.0007969	43	119	16	195
352	0.0008363	7	123	23	239
353	0.0008332	41	137	12	233
354	0.0006357	5	116	15	227
355	0.0008328	121	187	27	253
356	0.0007773	16	139	18	262
357	0.0010693	23	134	19	245
358	0.0007572	43	129	21	215
359	0.0009358	30	128	15	226
360	0.000866	12	127	27	242
361	0.0008378	56	133	19	210
362	0.0008385	21	134	17	247
363	0.0007793	60	140	14	220
364	0.0008454	24	138	22	252
365	0.0008627	37	144	24	251
366	0.0008451	20	126	14	232
367	0.0007589	1	116	19	231
368	0.0008863	59	149	16	239
369	0.0007674	15	116	15	217
370	0.0005623	99	153	17	207
371	0.0006937	16	109	16	202
372	0.0009107	6	106	15	206
373	0.0008198	19	126	17	233
374	0.0008607	20	138	19	256
375	0.0007684	92	158	18	224
376	0.0009511	69	130	17	191
377	0.0008324	11	115	15	219
378	0.0008622	11	117	13	223
379	0.00086	90	159	16	228
380	0.0007621	68	157	19	246
381	0.0006585	9	122	16	235
382	0.0006893	23	115	14	207
383	0.0009189	65	153	15	241
384	0.0008112	58	157	14	256
385	0.0006975	29	135	16	241
386	0.0007562	16	126	22	236
387	0.0007464	45	133	22	221
388	0.0009953	68	146	18	224
389	0.0008797	30	136	26	242
390	0.000805	6	132	21	258
391	0.0008327	8	128	16	248
392	0.0007353	32	126	15	220
393	0.0006949	93	161	14	229
394	0.0008402	1	107	12	213
395	0.0007119	78	156	15	234
396	0.0008442	76	143	15	210
397	0.0006567	50	123	13	196
398	0.0006763	83	138	14	193
399	0.0007684	25	119	29	213
400	0.000842	16	109	16	202
401	0.0008922	2	122	28	242
402	0.0007125	21	130	16	239
403	0.0007422	25	115	16	205
404	0.0009396	17	130	16	243
405	0.0009207	34	146	29	258
406	0.0008521	88	154	17	220
407	0.0008878	57	167	26	277
408	0.0008097	74	141	20	208
409	0.0006792	24	129	18	234
410	0.0008138	50	134	15	218
411	0.000713	63	141	16	219
412	0.0007232	13	118	13	223
413	0.0007982	12	111	16	210
414	0.000777	105	166	22	227
415	0.0007671	19	116	19	213
416	0.0006792	8	133	20	258
417	0.000737	96	170	19	244
418	0.0008676	15	129	12	243
419	0.0009039	21	122	14	223
420	0.0007393	26	134	15	242
421	0.0008403	4	115	16	226
422	0.0007296	48	151	25	254
423	0.0007206	34	135	16	236
424	0.0007532	17	114	13	211
425	0.000819	53	145	14	237
426	0.0007791	6	138	17	270
427	0.0009628	88	173	25	258
428	0.0007926	60	132	14	204
429	0.0007296	51	144	18	237
430	0.0006435	6	103	15	200
431	0.0008961	16	128	17	240
432	0.0008058	3	93	14	183
433	0.0007269	41	126	17	211
434	0.0009065	49	136	19	223
435	0.0007906	31	130	16	229
436	0.00077	8	111	13	214
437	0.0008302	48	140	20	232
438	0.0009253	8	110	21	212
439	0.0008605	38	139	18	240
440	0.0007681	14	119	14	224
441	0.0010257	15	111	13	207
442	0.0008811	72	147	15	222
443	0.0006806	9	111	16	213
444	0.0008716	57	137	17	217
445	0.0008435	5	116	21	227
446	0.0006402	29	118	12	207
447	0.0009438	10	131	29	252
448	0.0007852	3	109	15	215
449	0.0009103	31	129	20	227
450	0.0007831	28	121	20	214
451	0.0007648	11	107	18	203
452	0.0008461	45	140	20	235
453	0.0007834	4	116	15	228
454	0.0008817	68	175	16	282
455	0.0008762	31	133	17	235
456	0.0007674	6	115	18	224
457	0.0008365	21	130	17	239
458	0.0007084	33	119	21	205
459	0.0007661	5	104	12	203
460	0.0007928	45	141	14	237
461	0.0008845	115	190	20	265
462	0.0008501	2	123	26	244
463	0.0007666	12	132	24	252
464	0.0008057	4	130	21	256
465	0.0009084	22	132	22	242
466	0.000749	3	111	21	219
467	0.000729	7	109	19	211
468	0.0008449	28	124	15	220
469	0.0007643	36	115	13	194
470	0.0008687	42	145	19	248
471	0.0008226	34	142	25	250
472	0.0008598	34	140	15	246
473	0.0008804	48	161	16	274
474	0.0008276	16	120	22	224
475	0.0008274	28	112	14	196
476	0.0007768	55	151	13	247
477	0.0007434	22	125	15	228
478	0.0007681	4	118	23	232
479	0.0007252	12	124	16	236
480	0.0007068	4	123	13	242
481	0.0008074	42	122	19	202
482	0.0007944	37	135	16	233
483	0.0007086	52	134	18	216
484	0.0007471	60	140	20	220
485	0.0007912	55	141	14	227
486	0.0010161	19	118	16	217
487	0.0008519	66	154	22	242
488	0.0008897	19	157	29	295
489	0.0007783	55	165	18	275
490	0.0007227	2	101	13	200
491	0.0007886	17	140	17	263
492	0.0008009	35	135	20	235
493	0.0008388	135	212	22	289
494	0.0008991	69	146	15	223
495	0.0007802	11	109	17	207
496	0.000762	56	154	17	252
497	0.0007792	12	119	17	226
498	0.0007797	2	113	18	224
499	0.0007966	19	103	15	187
500	0.0007925	88	159	18	230
501	0.0006963	2	100	19	198
502	0.00082	56	131	19	206
503	0.0007801	39	148	19	257
504	0.0007014	23	105	21	187
505	0.0006913	34	135	20	236
506	0.0006752	107	189	26	271
507	0.0008827	32	135	12	238
508	0.0008581	24	135	19	246
509	0.0007809	6	115	21	224
510	0.0005528	39	122	11	205
511	0.0007148	32	134	17	236
512	0.000891	14	118	15	222
513	0.0008385	6	130	19	254
514	0.0008044	37	122	17	207
515	0.0007883	1	112	20	223
516	0.0005644	11	108	16	205
517	0.0009257	1	133	19	265
518	0.0007444	10	96	15	182
519	0.0007547	27	136	27	245
520	0.0008189	22	121	16	220
521	0.0006964	43	120	13	197
522	0.0006979	19	121	14	223
523	0.0007567	10	116	16	222
524	0.0007342	25	128	13	231
525	0.0008191	14	119	15	224
526	0.0008543	2	119	16	236
527	0.0006858	13	112	19	211
528	0.0009673	11	141	25	271
529	0.0007087	49	141	16	233
530	0.0008496	33	122	20	211
531	0.0008504	0	124	18	248
532	0.0008534	82	174	27	266
533	0.000742	9	104	15	199
534	0.0009086	2	126	16	250
535	0.0008488	7	121	16	235
536	0.0007509	32	121	15	210
537	0.0007821	17	136	18	255
538	0.0008768	54	166	28	278
539	0.0008184	25	139	17	253
540	0.0007785	21	123	22	225
541	0.0008553	5	144	16	283
542	0.0007398	25	132	14	239
543	0.0007207	16	122	16	228
544	0.0008072	37	140	18	243
545	0.0007549	3	126	27	249
546	0.0008697	61	148	18	235
547	0.0007705	4	112	16	220
548	0.0007506	21	119	18	217
549	0.0009014	43	138	17	233
550	0.0008402	20	127	18	234
551	0.0007322	38	141	17	244
552	0.0007972	11	122	18	233
553	0.0009073	12	102	15	192
554	0.0008466	13	138	16	263
555	0.0008905	16	112	24	208
556	0.0009281	19	130	19	241
557	0.0007622	18	112	14	206
558	0.0008956	33	157	16	281
559	0.0006316	21	110	15	199
560	0.0008181	12	138	18	264
561	0.0007589	1	102	18	203
562	0.0008722	50	158	17	266
563	0.0006362	18	98	13	178
564	0.0007805	34	139	19	244
565	0.0007274	7	109	15	211
566	0.0006781	21	127	15	233
567	0.000796	37	123	14	209
568	0.0008672	23	135	25	247
569	0.0006646	8	107	11	206
570	0.0007268	7	122	23	237
571	0.0008907	50	157	20	264
572	0.0009154	92	177	15	262
573	0.0008462	97	185	27	273
574	0.0009396	75	144	14	213
575	0.0008923	42	143	28	244
576	0.0008725	74	155	18	236
577	0.0007674	67	143	19	219
578	0.000705	73	166	16	259
579	0.0008795	48	154	25	260
580	0.0007559	21	126	26	231
581	0.000874	58	150	21	242
582	0.0008612	42	139	23	236
583	0.0006779	9	108	17	207
584	0.0008362	12	147	21	282
585	0.0007304	13	116	17	219
586	0.0008931	9	134	21	259
587	0.0007691	13	124	16	235
588	0.0008687	1	142	28	283
589	0.000786	43	118	14	193
590	0.0007626	12	132	15	252
591	0.00072	41	143	14	245
592	0.0007436	21	134	21	247
593	0.0007552	45	133	18	221
594	0.0007476	51	136	19	221
595	0.0008686	20	133	19	246
596	0.0007199	8	112	17	216
597	0.0007727	102	166	16	230
598	0.000753	70	139	16	208
599	0.0007208	5	120	18	235
600	0.0006988	23	116	16	209
601	0.0007939	4	114	13	224
602	0.000846	16	140	29	264
603	0.0010075	64	155	17	246
604	0.0009564	11	114	16	217
605	0.0007981	14	114	17	214
606	0.0008004	2	98	22	194
607	0.00079	13	125	16	237
608	0.0006062	15	102	15	189
609	0.000771	35	141	17	247
610	0.0008935	79	160	14	241
611	0.0007591	12	144	24	276
612	0.0008626	71	166	23	261
613	0.0007013	35	120	14	205
614	0.0008656	17	153	27	289
615	0.0008239	10	115	17	220
616	0.0008091	41	124	16	207
617	0.0007171	9	113	18	217
618	0.0008067	19	128	25	237
619	0.0009326	107	176	19	245
620	0.0009912	36	158	20	280
621	0.00075	1	120	24	239
622	0.000866	73	137	17	201
623	0.0008221	40	136	16	232
624	0.0006805	18	129	19	240
625	0.0007855	65	147	14	229
626	0.0007705	12	121	15	230
627	0.0007304	4	120	14	236
628	0.0007987	39	145	15	251
629	0.0008284	17	137	18	257
630	0.0008127	13	132	16	251
631	0.0007256	42	119	15	196
632	0.0008275	77	149	24	221
633	0.0007329	6	123	15	240
634	0.0006604	1	99	14	197
635	0.0009713	107	185	19	263
636	0.0007904	38	158	26	278
637	0.0007997	88	172	14	256
638	0.0007576	33	129	19	225
639	0.0007833	4	126	24	248
640	0.0006287	4	105	12	206
641	0.0007752	2	127	15	252
642	0.0010613	10	140	26	270
643	0.0008095	79	159	16	239
644	0.0006829	7	98	15	189
645	0.0008634	3	119	18	235
646	0.0007364	73	146	29	219
647	0.0008803	8	119	25	230
648	0.0006997	29	121	17	213
649	0.0008639	25	122	21	219
650	0.0007396	6	114	15	222
651	0.0006486	40	137	15	234
652	0.0010455	81	177	29	273
653	0.0007608	11	110	11	209
654	0.0008744	33	145	18	257
655	0.0007707	54	145	23	236
656	0.0008215	8	116	21	224
657	0.0007544	4	115	20	226
658	0.0007758	1	101	13	201
659	0.0007897	36	139	17	242
660	0.000889	2	119	14	236
661	0.0007423	49	132	14	215
662	0.0008932	47	141	22	235
663	0.0007815	18	132	19	246
664	0.0009448	62	156	16	250
665	0.0008971	73	155	17	237
666	0.0008528	20	122	12	224
667	0.0008111	11	128	23	245
668	0.000825	13	130	18	247
669	0.0008974	4	124	18	244
670	0.0009095	22	135	18	248
671	0.0008954	10	144	28	278
672	0.0007874	79	164	18	249
673	0.0007948	104	190	25	276
674	0.0007347	31	140	18	249
675	0.0008634	35	148	29	261
676	0.0009085	110	172	17	234
677	0.0007307	40	140	15	240
678	0.0007828	83	182	28	281
679	0.0007941	58	144	18	230
680	0.0009114	71	139	16	207
681	0.0008147	6	119	23	232
682	0.0007077	8	127	17	246
683	0.0007448	11	105	18	199
684	0.0007258	51	142	21	233
685	0.0008729	33	152	21	271
686	0.0008006	104	160	18	216
687	0.0008378	46	151	19	256
688	0.0006397	14	94	18	174
689	0.0008324	73	153	19	233
690	0.0009651	108	187	24	266
691	0.0007581	59	137	15	215
692	0.0007574	24	114	15	204
693	0.0007436	19	121	14	223
694	0.0007787	15	109	13	203
695	0.0006966	23	124	12	225
696	0.000822	13	113	18	213
697	0.0008217	12	131	26	250
698	0.0009007	41	146	23	251
699	0.0007209	122	176	18	230
700	0.0006988	44	130	11	216
701	0.0009537	21	146	29	271
702	0.0009133	37	132	16	227
703	0.0007746	45	147	15	249
704	0.000755	17	123	15	229
705	0.0008373	57	156	20	255
706	0.0008217	38	134	15	230
707	0.0008728	74	163	19	252
708	0.0008813	38	156	19	274
709	0.0007774	10	118	14	226
710	0.000829	67	143	14	219
711	0.0007583	30	128	16	226
712	0.000761	67	148	15	229
713	0.0007757	54	140	21	226
714	0.0010368	18	137	15	256
715	0.0007361	30	116	15	202
716	0.0008131	7	101	16	195
717	0.0008029	11	118	19	225
718	0.0007853	21	131	18	241
719	0.0008042	11	109	13	207
720	0.0007708	3	107	16	211
721	0.0007361	20	125	14	230
722	0.0006873	12	121	13	230
723	0.0007681	12	118	19	224
724	0.0007245	3	125	16	247
725	0.0010049	32	134	19	236
726	0.0007972	68	146	19	224
727	0.0009217	45	163	25	281
728	0.0008531	13	128	18	243
729	0.0009372	54	142	15	230
730	0.0008793	14	121	16	228
731	0.0006672	24	112	18	200
732	0.0008226	6	129	15	252
733	0.0007956	47	166	15	285
734	0.0009172	8	105	16	202
735	0.0007675	2	123	14	244
736	0.0008944	52	154	28	256
737	0.0008552	34	145	16	256
738	0.0009611	11	131	18	251
739	0.0008562	74	152	19	230
740	0.0007426	56	148	19	240
741	0.0007871	25	135	18	245
742	0.0007763	63	146	18	229
743	0.0008463	82	169	22	256
744	0.0007727	63	120	11	177
745	0.0006381	12	112	19	212
746	0.000827	101	172	17	243
747	0.0009369	27	128	17	229
748	0.0008447	16	135	18	254
749	0.0008664	49	151	22	253
750	0.0008618	10	113	23	216
751	0.0007865	33	130	14	227
752	0.0008749	2	116	16	230
753	0.0007802	0	121	18	242
754	0.0008563	43	136	15	229
755	0.000819	35	139	17	243
756	0.0009021	40	132	20	224
757	0.0009159	54	137	20	220
758	0.0008841	103	160	16	217
759	0.0007866	6	112	12	218
760	0.0007761	49	139	16	229
761	0.0007773	3	120	14	237
762	0.0008931	49	146	24	243
763	0.0008167	2	136	16	270
764	0.0008068	18	130	27	242
765	0.0007615	1	115	17	229
766	0.0008255	19	137	15	255
767	0.0008776	55	148	16	241
768	0.0008089	33	130	12	227
769	0.0008179	11	112	17	213
770	0.0007818	44	143	16	242
771	0.0008459	4	129	16	254
772	0.0007483	29	128	16	227
773	0.0007391	20	120	13	220
774	0.0007822	48	131	17	214
775	0.0007441	40	126	17	212
776	0.0006783	29	109	13	189
777	0.0007345	1	111	12	221
778	0.000775	33	136	22	239
779	0.0008242	13	122	17	231
780	0.0008666	40	126	12	212
781	0.0008245	0	137	17	274
782	0.0008671	51	152	18	253
783	0.0008115	36	139	26	242
784	0.000851	42	145	25	248
785	0.0007923	29	145	17	261
786	0.0007321	3	121	14	239
787	0.0010004	114	201	29	288
788	0.0009644	78	161	21	244
789	0.0008738	26	129	13	232
790	0.0007318	35	145	25	255
791	0.0008486	47	146	17	245
792	0.0008316	13	120	15	227
793	0.0008155	37	134	18	231
794	0.0007735	44	134	17	224
795	0.0007567	37	116	15	195
796	0.0008499	32	150	18	268
797	0.0009042	52	136	18	220
798	0.0007426	50	135	14	220
799	0.0008089	45	156	29	267
800	0.0008775	4	145	26	286
801	0.0008137	77	163	18	249
802	0.0007647	10	116	17	222
803	0.0008532	27	138	28	249
804	0.0008507	92	154	21	216
805	0.000724	28	126	23	224
806	0.0009704	48	160	14	272
807	0.0007307	21	112	13	203
808	0.0008294	92	165	18	238
809	0.000831	39	140	13	241
810	0.0009818	35	165	29	295
811	0.0007256	4	126	19	248
812	0.0008094	78	179	25	280
813	0.0008079	53	145	17	237
814	0.0006729	7	116	13	225
815	0.0008001	83	169	17	255
816	0.0007687	69	153	18	237
817	0.0007456	21	119	15	217
818	0.0007113	22	113	16	204
819	0.0007838	22	142	28	262
820	0.000755	12	112	17	212
821	0.0008917	15	118	15	221
822	0.0006992	14	101	12	188
823	0.0007797	24	136	17	248
824	0.0009753	66	170	26	274
825	0.0007914	25	128	16	231
826	0.0007753	24	118	13	212
827	0.0008078	12	107	13	202
828	0.000753	24	125	28	226
829	0.0008101	45	137	13	229
830	0.0008083	42	112	13	182
831	0.0008851	25	141	18	257
832	0.0008108	18	122	14	226
833	0.0006554	19	128	16	237
834	0.0008012	33	129	14	225
835	0.0009451	109	194	20	279
836	0.0007493	24	104	13	184
837	0.0008048	61	142	18	223
838	0.0009104	12	143	27	274
839	0.0007985	20	131	24	242
840	0.0007418	35	122	17	209
841	0.0007795	15	108	15	201
842	0.0007084	32	112	14	192
843	0.0008061	27	130	22	233
844	0.0008799	40	147	14	254
845	0.0008644	100	169	17	238
846	0.000893	17	118	17	219
847	0.0008093	2	118	17	234
848	0.0007997	41	129	16	217
849	0.0007657	5	111	14	217
850	0.0007257	1	114	14	227
851	0.000804	22	128	16	234
852	0.0009807	60	170	27	280
853	0.0007874	9	117	15	225
854	0.0007809	35	127	18	219
855	0.0007322	10	112	12	214
856	0.0008615	21	137	24	253
857	0.0007219	25	110	14	195
858	0.0007334	6	128	20	250
859	0.0007269	59	140	14	221
860	0.0007361	18	125	18	232
861	0.0008292	61	160	25	259
862	0.0009109	65	143	20	221
863	0.0007351	62	136	15	210
864	0.0008426	66	153	21	240
865	0.0006727	74	144	29	214
866	0.0007011	42	138	14	234
867	0.0007815	55	144	14	233
868	0.0008149	32	146	15	260
869	0.0007917	52	131	14	210
870	0.0007504	5	116	15	227
871	0.0008144	15	125	14	235
872	0.0008399	16	126	17	236
873	0.0008044	30	139	17	248
874	0.0007835	15	117	13	219
875	0.0008594	82	157	16	232
876	0.0007793	26	139	19	252
877	0.0008822	34	148	25	262
878	0.0007808	59	150	14	241
879	0.0009044	124	199	24	274
880	0.0007387	3	129	14	255
881	0.0009113	5	131	20	257
882	0.0007519	49	139	14	229
883	0.0007308	19	148	27	277
884	0.0009207	43	143	14	243
885	0.0007565	47	122	16	197
886	0.0007775	0	110	15	220
887	0.0006842	17	128	18	239
888	0.0008005	9	124	26	239
889	0.0008692	58	159	17	260
890	0.000792	22	121	21	220
891	0.0008408	73	162	23	251
892	0.0008368	20	120	23	220
893	0.0008881	32	147	28	262
894	0.0008127	83	165	23	247
895	0.0008475	4	127	15	250
896	0.000882	63	160	19	257
897	0.0007655	19	121	18	223
898	0.0006619	0	98	12	196
899	0.000866	69	168	18	267
900	0.000822	72	150	28	228
901	0.0008347	41	123	14	205
902	0.0007681	43	148	20	253
903	0.0008978	68	163	15	258
904	0.0008384	52	139	22	226
905	0.0007345	3	106	15	209
906	0.0008534	22	136	14	250
907	0.0007829	54	141	15	228
908	0.0007569	54	134	17	214
909	0.000748	12	107	14	202
910	0.0007367	30	129	12	228
911	0.0007956	37	145	17	253
912	0.0008253	2	132	16	262
913	0.0008756	43	160	16	277
914	0.0007283	13	125	28	237
915	0.0008666	121	186	22	251
916	0.0007262	24	119	16	214
917	0.0008145	24	150	19	276
918	0.0008452	21	135	17	249
919	0.000995	26	152	25	278
920	0.0007971	54	149	16	244
921	0.0008198	36	138	28	240
922	0.0008012	43	137	15	231
923	0.0007682	29	121	19	213
924	0.0007294	17	116	22	215
925	0.0007413	4	118	12	232
926	0.0007164	11	110	15	209
927	0.0009563	54	160	22	266
928	0.0007767	8	106	16	204
929	0.0009019	22	163	27	304
930	0.0007842	3	141	20	279
931	0.00081	17	127	15	237
932	0.000681	10	110	17	210
933	0.0007437	41	126	12	211
934	0.0007609	66	139	15	212
935	0.0007708	22	133	20	244
936	0.0007524	53	143	19	233
937	0.0008249	25	142	28	259
938	0.0007935	32	115	16	198
939	0.0009263	100	181	19	262
940	0.0008	26	133	17	240
941	0.0008727	23	132	23	241
942	0.0007721	13	120	19	227
943	0.0008307	20	121	16	222
944	0.0008121	22	116	15	210
945	0.0007076	11	112	13	213
946	0.0007463	48	135	22	222
947	0.0006813	14	117	12	220
948	0.0007037	5	106	15	207
949	0.0008185	76	153	17	230
950	0.0008343	79	153	14	227
951	0.0006381	86	144	19	202
952	0.0007229	54	123	15	192
953	0.0007402	5	103	16	201
954	0.0006514	19	111	13	203
955	0.0009826	77	185	28	293
956	0.0007789	43	129	17	215
957	0.0008009	37	121	28	205
958	0.0006424	20	108	12	196
959	0.0009368	37	148	22	259
960	0.0007586	17	123	15	229
961	0.0007328	43	132	15	221
962	0.0008826	53	151	17	249
963	0.0008669	28	121	14	214
964	0.0007303	14	110	16	206
965	0.0008056	78	162	13	246
966	0.0009739	33	127	16	221
967	0.000833	62	153	21	244
968	0.0007911	52	138	29	224
969	0.0010967	12	119	24	226
970	0.0009469	65	167	23	269
971	0.0008261	38	148	26	258
972	0.0008266	17	144	21	271
973	0.0006226	5	122	14	239
974	0.0011669	32	131	28	230
975	0.0008185	26	138	13	250
976	0.000827	74	147	17	220
977	0.0008889	103	170	19	237
978	0.0007971	17	125	19	233
979	0.0007954	7	134	15	261
980	0.0007927	16	117	22	218
981	0.0006276	9	113	13	217
982	0.0008519	51	129	13	207
983	0.0007161	29	120	12	211
984	0.000791	5	111	15	217
985	0.0009648	62	174	18	286
986	0.0007421	21	124	17	227
987	0.000755	52	142	19	232
988	0.0009731	32	147	26	262
989	0.0009593	48	148	17	248
990	0.0007098	19	128	16	237
991	0.0008264	28	125	17	222
992	0.0007489	34	144	23	254
993	0.0008132	16	143	25	270
994	0.000831	11	119	24	227
995	0.0007775	2	97	15	192
996	0.0008705	54	153	15	252
997	0.0006487	38	126	12	214
998	0.0009748	68	163	16	258
999	0.0007739	10	110	13	210
mean	0.000807252	33.884	133.59	18.117	233.296

## Sheet: PowerBalance_SEq
	time	SEq	Bal	Reg	Egal
0	0.0005147	34	145	20	256
1	0.0007215	121	196	24	271
2	0.0007502	7	111	14	215
3	0.0007373	21	123	16	225
4	0.0007605	6	124	20	242
5	0.0004424	7	101	16	195
6	0.0007424	24	120	12	216
7	0.0007409	21	124	17	227
8	0.0005809	35	138	27	241
9	0.000505	4	118	18	232
10	0.0005134	2	108	19	214
11	0.0004351	1	114	21	227
12	0.0004935	32	109	17	186
13	0.0005931	47	153	19	259
14	0.0007679	3	120	17	237
15	0.0007922	16	118	19	220
16	0.0005709	4	113	20	222
17	0.0007414	25	151	14	277
18	0.0005566	8	118	14	228
19	0.0006253	15	121	14	227
20	0.0007698	20	134	15	248
21	0.0005015	11	127	14	243
22	0.0007148	12	139	26	266
23	0.0004674	5	104	18	203
24	0.0008522	11	121	18	231
25	0.0005517	6	107	15	208
26	0.0007409	18	113	13	208
27	0.0008592	42	133	14	224
28	0.0005102	3	116	16	229
29	0.000732	23	129	18	235
30	0.0004977	1	106	18	211
31	0.0004972	1	117	17	233
32	0.0007248	15	110	17	205
33	0.0005287	7	135	14	263
34	0.0007492	43	163	28	283
35	0.0005475	26	129	17	232
36	0.0006473	6	104	21	202
37	0.0007377	29	143	15	257
38	0.001105	29	135	15	241
39	0.00072	31	137	13	243
40	0.0005845	24	150	27	276
41	0.0007019	8	110	18	212
42	0.0007133	58	152	28	246
43	0.0007504	28	121	16	214
44	0.0007545	14	113	24	212
45	0.0007029	62	163	21	264
46	0.0005611	37	157	17	277
47	0.0007669	20	115	18	210
48	0.000768	15	145	13	275
49	0.000754	24	137	17	250
50	0.0007495	21	134	14	247
51	0.0007686	27	165	28	303
52	0.0005868	2	112	21	222
53	0.0008349	19	142	26	265
54	0.0006112	8	114	18	220
55	0.0005714	12	129	26	246
56	0.0008218	10	113	18	216
57	0.000449	7	105	18	203
58	0.0007175	10	113	17	216
59	0.0006879	152	199	18	246
60	0.0007434	15	122	17	229
61	0.0007225	51	137	26	223
62	0.0007156	93	175	18	257
63	0.0004771	3	119	21	235
64	0.0006625	24	149	26	274
65	0.0007343	14	132	18	250
66	0.0006049	48	118	17	188
67	0.0005366	9	120	20	231
68	0.0005292	6	117	15	228
69	0.0007593	8	131	15	254
70	0.0007395	35	134	21	233
71	0.0007368	27	112	14	197
72	0.0007397	7	121	18	235
73	0.0004485	6	117	11	228
74	0.000481	5	136	17	267
75	0.0007437	23	120	12	217
76	0.0005146	23	141	16	259
77	0.0007728	15	106	17	197
78	0.0007546	11	137	23	263
79	0.0007226	17	125	23	233
80	0.000569	11	118	16	225
81	0.0006227	7	128	22	249
82	0.0005612	4	161	27	318
83	0.0007629	15	117	14	219
84	0.0007576	23	130	26	237
85	0.0006093	7	104	14	201
86	0.0007213	39	126	17	213
87	0.0007697	30	126	15	222
88	0.0007375	38	136	17	234
89	0.0005721	0	106	16	212
90	0.0007048	67	160	19	253
91	0.000802	17	140	28	263
92	0.0006292	72	166	23	260
93	0.0007023	10	124	15	238
94	0.0005119	7	109	19	211
95	0.0007361	14	131	16	248
96	0.0004975	13	102	10	191
97	0.0005515	1	135	16	269
98	0.0008491	25	132	15	239
99	0.0005607	5	99	12	193
100	0.0006449	37	142	26	247
101	0.0007716	15	150	26	285
102	0.0007826	29	127	28	225
103	0.0006359	33	128	24	223
104	0.0005737	12	112	16	212
105	0.0007581	3	117	12	231
106	0.000761	32	137	17	242
107	0.000582	22	153	27	284
108	0.0006534	74	152	16	230
109	0.0007621	24	145	24	266
110	0.0006123	11	106	11	201
111	0.0004936	15	112	13	209
112	0.0007596	24	134	19	244
113	0.000717	15	99	17	183
114	0.0004857	8	96	19	184
115	0.0005162	18	122	23	226
116	0.000505	16	146	15	276
117	0.0006587	7	126	24	245
118	0.0005434	41	131	15	221
119	0.0006192	13	137	25	261
120	0.0005131	23	133	16	243
121	0.0006417	24	125	16	226
122	0.0005272	13	110	16	207
123	0.0005869	15	98	13	181
124	0.0007279	19	101	17	183
125	0.0005699	8	120	15	232
126	0.000479	9	103	16	197
127	0.0005583	2	101	29	200
128	0.000746	15	140	16	265
129	0.0007325	23	152	20	281
130	0.0007372	23	127	12	231
131	0.0008107	21	123	29	225
132	0.000834	9	115	16	221
133	0.0005127	17	128	20	239
134	0.0005234	3	108	27	213
135	0.0005959	33	135	14	237
136	0.0007392	11	122	15	233
137	0.0005616	7	129	14	251
138	0.0004322	10	111	12	212
139	0.0006013	57	154	18	251
140	0.0005289	2	125	29	248
141	0.0007261	43	154	29	265
142	0.0007702	24	144	21	264
143	0.0007624	25	135	22	245
144	0.0005091	2	105	15	208
145	0.0005511	6	130	23	254
146	0.0007415	10	110	15	210
147	0.0007689	20	103	17	186
148	0.0007606	15	128	20	241
149	0.0004647	5	124	15	243
150	0.0007394	14	118	17	222
151	0.0007983	27	115	19	203
152	0.0004985	3	110	14	217
153	0.0007242	21	116	18	211
154	0.0006123	15	135	16	255
155	0.0007343	44	142	17	240
156	0.0005772	23	118	15	213
157	0.000888	12	126	19	240
158	0.0007339	8	130	26	252
159	0.0004824	3	122	18	241
160	0.0009176	11	118	19	225
161	0.0007374	27	116	15	205
162	0.0005721	14	113	14	212
163	0.000516	7	137	25	267
164	0.0004387	2	95	19	188
165	0.0007259	23	118	22	213
166	0.0007519	14	140	17	266
167	0.0005695	40	107	13	174
168	0.0007537	32	160	26	288
169	0.0007027	4	123	13	242
170	0.0005907	13	123	18	233
171	0.0005402	7	116	20	225
172	0.0005681	14	128	26	242
173	0.0007812	108	187	19	266
174	0.0007633	8	130	14	252
175	0.000776	21	122	15	223
176	0.0004915	10	106	15	202
177	0.000495	2	114	18	226
178	0.0005211	3	121	25	239
179	0.0004628	0	117	15	234
180	0.001356	20	146	23	272
181	0.0007784	30	135	15	240
182	0.0004457	18	110	12	202
183	0.0005451	4	118	16	232
184	0.0005851	54	134	17	214
185	0.0005363	6	118	16	230
186	0.0007073	65	143	16	221
187	0.0004812	0	110	14	220
188	0.000744	33	135	16	237
189	0.00054	24	126	26	228
190	0.0004319	2	112	17	222
191	0.0005278	7	121	14	235
192	0.0008034	9	117	17	225
193	0.0006227	5	132	25	259
194	0.0005177	18	126	12	234
195	0.0006082	22	124	19	226
196	0.0005696	45	143	24	241
197	0.0008003	11	120	20	229
198	0.0005732	15	120	22	225
199	0.0006004	28	140	22	252
200	0.000738	16	111	25	206
201	0.0007942	15	120	17	225
202	0.0007901	54	175	28	296
203	0.0004863	0	121	16	242
204	0.0004764	18	119	15	220
205	0.0007291	15	108	17	201
206	0.0007301	22	122	12	222
207	0.0007491	36	144	17	252
208	0.0004193	13	105	12	197
209	0.0007678	21	111	11	201
210	0.0007393	13	112	18	211
211	0.0007354	9	140	18	271
212	0.0005272	32	140	17	248
213	0.0005344	9	108	20	207
214	0.0007456	22	130	13	238
215	0.0004468	2	104	14	206
216	0.0005815	8	127	20	246
217	0.0007536	121	180	21	239
218	0.0007575	10	122	22	234
219	0.0007362	30	136	15	242
220	0.0007365	67	147	23	227
221	0.0006337	9	122	16	235
222	0.000531	7	115	21	223
223	0.0006189	9	137	16	265
224	0.0005734	4	128	16	252
225	0.0007613	12	130	28	248
226	0.0007679	30	128	10	226
227	0.0007019	24	124	17	224
228	0.0005519	14	113	18	212
229	0.0006292	34	139	19	244
230	0.0005573	3	118	18	233
231	0.0008171	6	132	16	258
232	0.0007982	18	163	25	308
233	0.0006854	137	205	26	273
234	0.0006295	4	123	15	242
235	0.0006017	40	138	16	236
236	0.0004307	10	99	15	188
237	0.0007168	12	118	13	224
238	0.0005699	4	105	17	206
239	0.0007524	12	113	20	214
240	0.000603	4	139	27	274
241	0.000744	16	122	16	228
242	0.0004718	3	100	15	197
243	0.0007151	21	141	13	261
244	0.0007504	27	146	15	265
245	0.0008124	32	143	16	254
246	0.0005656	32	133	13	234
247	0.0004267	1	118	14	235
248	0.0005552	19	132	16	245
249	0.0006744	13	115	18	217
250	0.0007161	33	131	19	229
251	0.0007159	19	114	15	209
252	0.0008516	18	123	24	228
253	0.0005164	7	106	14	205
254	0.0004334	2	130	14	258
255	0.0005824	48	146	28	244
256	0.000579	24	127	29	230
257	0.0006914	39	147	23	255
258	0.0005058	3	105	18	207
259	0.000485	3	109	16	215
260	0.0006559	23	128	16	233
261	0.0005469	56	141	16	226
262	0.0008162	10	116	14	222
263	0.0005961	12	121	18	230
264	0.0004826	5	106	14	207
265	0.0007237	35	151	24	267
266	0.0006621	34	123	18	212
267	0.000599	13	115	18	217
268	0.0007131	11	138	18	265
269	0.0006211	4	133	14	262
270	0.0005589	2	122	16	242
271	0.0007685	9	119	16	229
272	0.0006733	19	122	27	225
273	0.0007421	24	138	17	252
274	0.0007213	15	123	15	231
275	0.0005876	43	145	28	247
276	0.0007517	29	135	15	241
277	0.0007582	28	119	13	210
278	0.0007848	23	136	17	249
279	0.0005643	9	134	26	259
280	0.0007907	33	149	22	265
281	0.0005926	24	139	25	254
282	0.000779	20	118	22	216
283	0.0007511	23	117	13	211
284	0.0005566	2	104	20	206
285	0.0005595	3	114	13	225
286	0.0004824	4	123	14	242
287	0.0005829	23	117	17	211
288	0.0006917	78	167	17	256
289	0.0006155	21	116	14	211
290	0.000627	36	135	14	234
291	0.0007597	113	173	16	233
292	0.0006505	14	104	14	194
293	0.0005253	52	149	18	246
294	0.0004791	1	113	15	225
295	0.0007309	13	133	16	253
296	0.0007663	31	109	20	187
297	0.0006319	5	138	29	271
298	0.0008305	9	129	14	249
299	0.0007435	5	145	22	285
300	0.0004178	15	119	13	223
301	0.0004475	4	105	12	206
302	0.0007405	21	102	20	183
303	0.0007209	21	120	13	219
304	0.0007563	31	111	16	191
305	0.0004959	16	126	24	236
306	0.0007124	125	203	18	281
307	0.0005672	36	156	29	276
308	0.0008663	49	129	21	209
309	0.0007309	11	129	17	247
310	0.0007519	37	132	26	227
311	0.0004922	5	110	18	215
312	0.0005739	14	111	16	208
313	0.000766	18	126	14	234
314	0.0007551	16	146	22	276
315	0.0005926	12	111	26	210
316	0.0005558	33	119	14	205
317	0.0005871	0	117	29	234
318	0.0005301	3	116	18	229
319	0.0007924	13	120	17	227
320	0.0005388	33	124	15	215
321	0.0007341	16	125	15	234
322	0.0007452	57	146	19	235
323	0.0004966	2	120	16	238
324	0.0007348	25	133	15	241
325	0.0007277	115	185	21	255
326	0.0007148	108	175	20	242
327	0.0005613	5	107	19	209
328	0.0004869	3	109	15	215
329	0.0006128	4	99	17	194
330	0.000728	13	115	14	217
331	0.0009096	6	126	15	246
332	0.0004841	2	124	19	246
333	0.0007273	9	123	15	237
334	0.0007473	98	177	22	256
335	0.0007615	35	151	14	267
336	0.0005545	17	149	22	281
337	0.0007274	42	126	11	210
338	0.0008212	20	129	25	238
339	0.0007639	25	133	13	241
340	0.0004869	0	109	26	218
341	0.0007474	19	131	19	243
342	0.0005571	1	100	13	199
343	0.0007047	73	143	19	213
344	0.0005362	19	114	16	209
345	0.0005406	5	129	19	253
346	0.0007377	9	132	28	255
347	0.0004758	6	121	18	236
348	0.0007294	7	120	21	233
349	0.000784	8	97	15	186
350	0.0007079	47	148	26	249
351	0.0005319	43	119	16	195
352	0.0004892	7	123	23	239
353	0.0007599	41	137	12	233
354	0.0004727	5	116	15	227
355	0.0004826	36	127	15	218
356	0.0006302	9	128	18	247
357	0.0007397	23	134	19	245
358	0.0008086	43	129	21	215
359	0.0007117	8	122	23	236
360	0.0005108	12	127	27	242
361	0.0006225	4	120	27	236
362	0.0007491	21	134	17	247
363	0.0008265	22	121	14	220
364	0.0006263	24	138	22	252
365	0.0008219	37	144	24	251
366	0.0005948	20	126	14	232
367	0.0005839	1	116	19	231
368	0.0005792	1	114	16	227
369	0.0005641	15	116	15	217
370	0.0007388	24	115	12	206
371	0.0007289	16	109	16	202
372	0.0006478	6	106	15	206
373	0.0008411	34	130	15	226
374	0.0008376	20	134	19	248
375	0.0007771	17	112	15	207
376	0.000689	69	130	17	191
377	0.0007444	11	115	15	219
378	0.000772	11	117	13	223
379	0.000923	22	135	20	248
380	0.0005564	2	114	18	226
381	0.0004934	9	122	16	235
382	0.0007359	23	115	14	207
383	0.0007615	65	153	15	241
384	0.0007554	17	147	21	277
385	0.0007722	41	132	16	223
386	0.0006281	16	126	22	236
387	0.0007266	41	133	22	225
388	0.0007161	68	146	18	224
389	0.0006031	30	136	26	242
390	0.0007578	46	151	21	256
391	0.0005614	1	122	16	243
392	0.0007525	22	136	17	250
393	0.0005871	49	147	13	245
394	0.0005868	1	107	12	213
395	0.0006558	3	113	15	223
396	0.0008253	76	143	15	210
397	0.0007384	22	114	24	206
398	0.0007271	51	122	14	193
399	0.0007325	25	119	29	213
400	0.0007857	16	109	16	202
401	0.0007104	2	122	28	242
402	0.0007209	21	130	16	239
403	0.0005647	25	115	16	205
404	0.0007835	17	130	16	243
405	0.0007396	16	137	29	258
406	0.0005106	40	124	19	208
407	0.000793	57	167	26	277
408	0.0007251	74	141	20	208
409	0.0004009	8	117	12	226
410	0.0007568	10	126	21	242
411	0.0007466	17	105	16	193
412	0.0006695	13	118	13	223
413	0.0004347	1	106	14	211
414	0.0006197	19	114	15	209
415	0.0005833	19	116	19	213
416	0.0007267	4	133	20	262
417	0.0005137	5	113	13	221
418	0.000602	15	129	12	243
419	0.000727	21	122	14	223
420	0.0007435	26	134	15	242
421	0.0004945	4	115	16	226
422	0.0006096	0	118	18	236
423	0.0008516	12	124	13	236
424	0.0004317	17	114	13	211
425	0.0005941	53	145	14	237
426	0.000764	6	138	17	270
427	0.0008601	66	160	25	254
428	0.0007485	12	125	26	238
429	0.0007445	14	124	17	234
430	0.0005214	6	103	15	200
431	0.0005945	16	128	17	240
432	0.0004418	3	93	14	183
433	0.0007332	13	112	17	211
434	0.0006398	49	136	19	223
435	0.0007537	27	129	21	231
436	0.0005062	8	111	13	214
437	0.0007238	17	121	27	225
438	0.0006535	8	110	21	212
439	0.0006194	38	139	18	240
440	0.0007818	13	119	14	225
441	0.0005026	15	111	13	207
442	0.0006797	3	114	11	225
443	0.0006412	9	111	16	213
444	0.0007815	37	126	17	215
445	0.0007495	41	132	21	223
446	0.0007367	8	108	17	208
447	0.0005424	12	129	29	246
448	0.0004353	3	109	15	215
449	0.0006209	2	110	20	218
450	0.0007272	28	121	20	214
451	0.0004379	11	107	18	203
452	0.0007288	30	140	27	250
453	0.0007728	20	121	15	222
454	0.0007656	17	155	16	293
455	0.0006577	31	133	17	235
456	0.0004613	6	115	18	224
457	0.0006981	21	130	17	239
458	0.0005073	33	119	21	205
459	0.0005818	5	104	12	203
460	0.000565	2	120	15	238
461	0.0007737	8	124	20	240
462	0.0005924	5	114	26	223
463	0.0004992	7	123	16	239
464	0.0005163	25	133	18	241
465	0.0007415	22	132	22	242
466	0.0004978	3	111	21	219
467	0.0005201	7	109	19	211
468	0.0007398	28	124	15	220
469	0.0005897	36	115	13	194
470	0.0005966	42	145	19	248
471	0.0006389	4	121	12	238
472	0.0005638	34	140	15	246
473	0.0007681	48	161	16	274
474	0.0007737	6	112	20	218
475	0.0007558	20	112	26	204
476	0.000775	5	126	13	247
477	0.0007365	19	127	16	235
478	0.0006005	4	118	23	232
479	0.0004925	5	121	16	237
480	0.0004213	4	123	13	242
481	0.0005649	4	106	17	208
482	0.0007133	17	123	16	229
483	0.0007367	23	133	18	243
484	0.0006112	6	122	18	238
485	0.0007363	55	141	14	227
486	0.0007436	12	115	16	218
487	0.0005931	45	142	22	239
488	0.0007638	19	157	29	295
489	0.0007368	55	165	18	275
490	0.0004451	2	101	13	200
491	0.000653	1	138	22	275
492	0.000845	35	135	20	235
493	0.000666	7	131	16	255
494	0.0007218	69	146	15	223
495	0.0007414	11	109	17	207
496	0.0007197	56	154	17	252
497	0.0004733	1	111	17	221
498	0.0004529	2	113	18	224
499	0.0008836	12	104	15	196
500	0.0007504	12	112	13	212
501	0.0007302	20	108	19	196
502	0.0005323	21	106	19	191
503	0.0005541	39	148	19	257
504	0.0008136	23	105	21	187
505	0.0007268	34	135	20	236
506	0.0004794	38	144	17	250
507	0.000817	32	135	12	238
508	0.0007386	24	135	19	246
509	0.0007305	16	118	15	220
510	0.0005801	39	122	11	205
511	0.0007302	15	122	17	229
512	0.0007342	14	118	15	222
513	0.0005356	6	130	19	254
514	0.0005322	37	122	17	207
515	0.0005648	1	112	20	223
516	0.0004552	32	117	16	202
517	0.0007438	46	147	19	248
518	0.0005095	10	96	15	182
519	0.0005066	9	113	19	217
520	0.0009907	17	127	21	237
521	0.0005739	43	120	13	197
522	0.0004537	2	113	14	224
523	0.0005272	4	116	16	228
524	0.0005861	18	125	13	232
525	0.0004394	14	119	15	224
526	0.000749	22	120	16	218
527	0.0006212	13	112	19	211
528	0.0006455	11	141	25	271
529	0.0005783	9	127	16	245
530	0.0005394	33	122	20	211
531	0.0004876	0	124	18	248
532	0.00056	51	158	29	265
533	0.0005313	9	104	15	199
534	0.0004929	2	126	16	250
535	0.0004928	7	121	16	235
536	0.000733	13	114	21	215
537	0.0007306	17	136	18	255
538	0.0006556	54	166	28	278
539	0.000746	18	139	20	260
540	0.0007408	21	123	22	225
541	0.0006422	5	144	16	283
542	0.0006364	25	132	14	239
543	0.0005092	0	113	18	226
544	0.0007305	37	140	18	243
545	0.0006087	3	126	27	249
546	0.0007343	61	148	18	235
547	0.00078	31	130	17	229
548	0.0004703	0	113	18	226
549	0.0005277	3	114	17	225
550	0.0005826	15	125	18	235
551	0.0005937	9	125	16	241
552	0.0007544	11	122	18	233
553	0.0005413	12	102	15	192
554	0.0005412	8	131	16	254
555	0.0005905	6	110	24	214
556	0.0008353	19	130	19	241
557	0.0004869	4	105	14	206
558	0.000754	33	157	16	281
559	0.0007202	21	110	15	199
560	0.0005212	12	138	18	264
561	0.0004956	10	106	12	202
562	0.0007462	8	143	16	278
563	0.0007722	16	102	13	188
564	0.0007546	31	134	19	237
565	0.0005893	7	109	15	211
566	0.0005563	6	118	16	230
567	0.0007866	35	117	17	199
568	0.0008158	46	145	25	244
569	0.0004351	8	107	11	206
570	0.0005505	7	122	23	237
571	0.0005989	2	136	20	270
572	0.0007172	92	177	15	262
573	0.0007235	82	176	27	270
574	0.0005641	75	144	14	213
575	0.0005753	42	143	28	244
576	0.000738	74	155	18	236
577	0.0007045	31	120	19	209
578	0.0005827	3	128	16	253
579	0.0007131	48	154	25	260
580	0.0006022	21	126	26	231
581	0.0007376	58	150	21	242
582	0.000611	42	139	23	236
583	0.0005956	9	108	17	207
584	0.0007643	12	147	21	282
585	0.0007252	13	116	17	219
586	0.0007115	0	132	21	264
587	0.0005214	2	117	16	232
588	0.0006323	1	142	28	283
589	0.0004995	24	106	14	188
590	0.0005243	12	132	15	252
591	0.000728	2	123	14	244
592	0.0007404	25	136	21	247
593	0.000596	45	133	18	221
594	0.0007234	23	124	19	225
595	0.0007563	20	133	19	246
596	0.0007481	16	110	14	204
597	0.0004879	5	112	13	219
598	0.0007847	28	125	18	222
599	0.0006057	3	118	18	233
600	0.0005668	23	116	16	209
601	0.0007464	4	114	13	224
602	0.0007358	16	140	29	264
603	0.0008047	64	155	17	246
604	0.0007512	11	114	16	217
605	0.0004969	14	114	17	214
606	0.0004551	2	98	22	194
607	0.0005482	13	125	16	237
608	0.0004585	15	102	15	189
609	0.0007559	12	124	15	236
610	0.0005772	79	160	14	241
611	0.000546	12	144	24	276
612	0.0006932	71	166	23	261
613	0.0005917	35	120	14	205
614	0.0006245	17	153	27	289
615	0.0007219	10	115	17	220
616	0.0007547	20	114	20	208
617	0.0005988	9	113	18	217
618	0.0007246	19	128	25	237
619	0.0007556	10	128	14	246
620	0.0004986	16	142	19	268
621	0.0004698	8	123	24	238
622	0.0009005	73	137	17	201
623	0.0005301	2	119	15	236
624	0.0007247	18	129	19	240
625	0.0006586	65	147	14	229
626	0.0007503	12	121	15	230
627	0.0008782	14	120	16	226
628	0.0007091	39	145	15	251
629	0.0005818	1	128	18	255
630	0.0007473	12	124	14	236
631	0.0008161	42	119	15	196
632	0.0005894	48	131	24	214
633	0.0004316	6	123	15	240
634	0.0004772	27	107	11	187
635	0.0008284	107	185	19	263
636	0.000726	8	144	26	280
637	0.0005417	3	133	17	263
638	0.0005616	1	117	19	233
639	0.0004863	4	126	24	248
640	0.0004074	4	105	12	206
641	0.0006137	2	127	15	252
642	0.0007544	10	140	26	270
643	0.0007504	23	136	15	249
644	0.0004934	7	98	15	189
645	0.0005887	3	119	18	235
646	0.0007372	17	111	17	205
647	0.0007938	8	119	25	230
648	0.0004635	11	112	17	213
649	0.000729	25	122	21	219
650	0.0005843	6	114	15	222
651	0.0008586	30	134	14	238
652	0.0007296	81	177	29	273
653	0.0007538	11	110	11	209
654	0.0007686	33	145	18	257
655	0.0006741	54	145	23	236
656	0.0005845	8	116	21	224
657	0.000493	4	115	20	226
658	0.0005066	1	101	13	201
659	0.0007469	6	118	17	230
660	0.0005484	2	119	14	236
661	0.0005316	6	107	14	208
662	0.0005866	47	141	22	235
663	0.0005658	18	132	19	246
664	0.0005289	5	133	27	261
665	0.0005628	5	122	18	239
666	0.0005905	20	122	12	224
667	0.0006395	5	117	19	229
668	0.0007982	13	130	18	247
669	0.0007227	4	124	18	244
670	0.0005472	22	135	18	248
671	0.0005891	10	144	28	278
672	0.0007497	16	134	16	252
673	0.0005823	104	190	25	276
674	0.0005362	3	127	16	251
675	0.0005867	35	148	29	261
676	0.000767	110	172	17	234
677	0.0007812	12	125	15	238
678	0.0007623	15	128	26	241
679	0.0005987	58	144	18	230
680	0.0007537	71	139	16	207
681	0.0005752	6	119	23	232
682	0.0007299	18	128	17	238
683	0.0008609	11	105	18	199
684	0.0007466	18	109	13	200
685	0.0005955	3	138	21	273
686	0.000715	104	160	18	216
687	0.0007399	19	143	25	267
688	0.0005717	14	94	18	174
689	0.0008039	18	122	16	226
690	0.000753	108	187	24	266
691	0.0008826	59	137	15	215
692	0.0005771	5	101	15	197
693	0.0004694	10	113	15	216
694	0.0005806	15	109	13	203
695	0.0007432	14	120	12	226
696	0.0007222	13	113	18	213
697	0.0006968	12	131	26	250
698	0.0007338	41	146	23	251
699	0.0005565	6	121	17	236
700	0.0005051	2	107	11	212
701	0.0007791	21	146	29	271
702	0.0005876	2	115	16	228
703	0.0007574	45	147	15	249
704	0.0005246	17	123	15	229
705	0.0006986	57	156	20	255
706	0.0007332	38	134	15	230
707	0.0006447	43	154	29	265
708	0.0007002	38	156	19	274
709	0.0007611	10	118	14	226
710	0.0008048	67	143	14	219
711	0.0006005	15	122	15	229
712	0.0007413	24	146	23	268
713	0.0004417	11	128	20	245
714	0.0005996	18	137	15	256
715	0.0006988	11	107	19	203
716	0.0004709	7	101	16	195
717	0.0005145	14	115	13	216
718	0.000606	21	131	18	241
719	0.0004119	11	109	13	207
720	0.0007533	45	124	16	203
721	0.0004402	20	125	14	230
722	0.0007013	12	121	13	230
723	0.000831	9	119	15	229
724	0.0005529	3	125	16	247
725	0.0006	6	120	25	234
726	0.0007464	8	125	24	242
727	0.0006057	29	152	25	275
728	0.0005046	1	123	23	245
729	0.0007566	54	142	15	230
730	0.0007418	14	121	16	228
731	0.0005094	34	116	18	198
732	0.0006045	6	129	15	252
733	0.000557	1	139	15	277
734	0.0007501	8	105	16	202
735	0.0004395	2	123	14	244
736	0.0007817	32	146	28	260
737	0.0008613	34	145	16	256
738	0.0006204	11	131	18	251
739	0.0007095	74	152	19	230
740	0.0007554	21	125	15	229
741	0.0007591	18	125	22	232
742	0.0006475	63	146	18	229
743	0.0005802	67	162	22	257
744	0.000729	33	100	15	167
745	0.0007102	21	115	19	209
746	0.000745	10	133	18	256
747	0.000602	27	128	17	229
748	0.0007785	22	125	15	228
749	0.0006412	5	124	17	243
750	0.0007752	12	113	18	214
751	0.0007421	7	123	16	239
752	0.0006404	26	127	16	228
753	0.0004609	0	121	18	242
754	0.000605	43	136	15	229
755	0.0006209	35	139	17	243
756	0.0006097	40	132	20	224
757	0.0005873	54	137	20	220
758	0.0006964	103	160	16	217
759	0.0006864	6	112	12	218
760	0.0007087	16	115	16	214
761	0.0006895	3	120	14	237
762	0.0007196	4	125	24	246
763	0.0004605	2	136	16	270
764	0.0005869	3	121	27	239
765	0.0006439	13	125	17	237
766	0.0007493	19	137	15	255
767	0.0008202	55	148	16	241
768	0.0007519	11	119	15	227
769	0.0007429	27	120	18	213
770	0.0005513	9	126	16	243
771	0.0006421	4	129	16	254
772	0.0004819	29	128	16	227
773	0.000657	9	114	13	219
774	0.00077	17	117	17	217
775	0.0006516	3	114	17	225
776	0.0004198	9	95	13	181
777	0.0005592	1	111	12	221
778	0.0007289	33	136	22	239
779	0.0006747	6	116	13	226
780	0.0007663	40	126	12	212
781	0.0006117	0	137	17	274
782	0.0005916	3	134	18	265
783	0.0007934	44	133	25	222
784	0.0007156	42	145	25	248
785	0.0005256	5	133	17	261
786	0.0006022	3	121	14	239
787	0.0007474	114	201	29	288
788	0.0007225	78	161	21	244
789	0.00077	26	129	13	232
790	0.000601	35	145	25	255
791	0.0005521	3	120	17	237
792	0.0007648	10	124	15	238
793	0.0007525	17	123	18	229
794	0.0004411	4	109	17	214
795	0.0007903	17	98	13	179
796	0.000638	14	142	18	270
797	0.0004957	2	109	14	216
798	0.0006608	33	125	14	217
799	0.0006689	45	156	29	267
800	0.0005652	4	145	26	286
801	0.0006086	8	131	18	254
802	0.0004694	10	116	17	222
803	0.0007376	27	138	28	249
804	0.0007201	92	154	21	216
805	0.0007154	28	126	23	224
806	0.00074	11	138	15	265
807	0.0007533	21	112	13	203
808	0.0007573	8	122	16	236
809	0.0006181	39	140	13	241
810	0.0007325	35	165	29	295
811	0.0006174	4	126	19	248
812	0.0004254	1	129	14	257
813	0.0005669	53	145	17	237
814	0.0006039	7	116	13	225
815	0.0007067	83	169	17	255
816	0.00072	32	138	20	244
817	0.0006423	21	119	15	217
818	0.0007115	12	109	16	206
819	0.0005563	22	142	28	262
820	0.0007566	31	117	17	203
821	0.00076	15	118	15	221
822	0.0004991	14	101	12	188
823	0.0007353	24	136	17	248
824	0.0009603	66	170	26	274
825	0.0007738	12	116	15	220
826	0.0005874	12	108	13	204
827	0.0007481	12	107	13	202
828	0.0007121	24	125	28	226
829	0.000517	24	128	13	232
830	0.0005507	1	94	13	187
831	0.0005497	25	141	18	257
832	0.0007397	18	122	14	226
833	0.0004173	2	115	16	228
834	0.0004972	6	109	12	212
835	0.000771	46	160	21	274
836	0.0004769	24	104	13	184
837	0.0005139	12	113	16	214
838	0.0007432	12	143	27	274
839	0.0005495	20	131	24	242
840	0.000725	35	122	17	209
841	0.0006133	1	103	15	205
842	0.000515	32	112	14	192
843	0.0008086	33	133	22	233
844	0.0006117	40	147	14	254
845	0.0007369	39	132	14	225
846	0.0004822	6	117	17	228
847	0.0005448	2	118	17	234
848	0.0006008	19	119	20	219
849	0.0004412	5	111	14	217
850	0.0005354	1	114	14	227
851	0.0007962	4	124	16	244
852	0.0005623	60	170	27	280
853	0.0005048	9	117	15	225
854	0.0004806	35	127	18	219
855	0.0006341	10	112	12	214
856	0.00081	34	131	16	228
857	0.000739	25	110	14	195
858	0.0004704	6	128	20	250
859	0.0007324	6	125	15	244
860	0.0005048	18	125	18	232
861	0.0006276	61	160	25	259
862	0.0005603	65	143	20	221
863	0.0005812	62	136	15	210
864	0.0007986	66	153	21	240
865	0.0009817	10	111	18	212
866	0.0004989	6	119	16	232
867	0.0005353	0	125	23	250
868	0.0005229	32	146	15	260
869	0.0005729	4	115	22	226
870	0.0004762	5	116	15	227
871	0.0008375	15	125	14	235
872	0.0006202	16	126	17	236
873	0.000765	13	126	17	239
874	0.0004729	6	109	19	212
875	0.0005702	8	112	15	216
876	0.0007483	26	139	19	252
877	0.0006157	34	148	25	262
878	0.0007116	30	129	19	228
879	0.0007551	14	135	20	256
880	0.0004828	3	129	14	255
881	0.0005703	29	138	21	247
882	0.0007308	11	123	23	235
883	0.0007318	4	136	27	268
884	0.0006081	19	124	14	229
885	0.0005892	1	104	19	207
886	0.0005331	0	110	15	220
887	0.0004728	3	118	18	233
888	0.0007471	9	124	26	239
889	0.0007816	23	134	17	245
890	0.0006297	22	121	21	220
891	0.0006657	10	122	15	234
892	0.000529	0	110	23	220
893	0.0006058	32	147	28	262
894	0.0007109	83	165	23	247
895	0.0007581	4	127	15	250
896	0.0007715	63	160	19	257
897	0.0007148	15	123	18	231
898	0.0004368	0	98	12	196
899	0.0007703	40	143	18	246
900	0.0005916	3	112	14	221
901	0.0006295	8	109	14	210
902	0.0005806	43	148	20	253
903	0.0007405	35	142	14	249
904	0.0009286	21	126	16	231
905	0.0006476	3	106	15	209
906	0.0006649	22	136	14	250
907	0.0007433	34	135	15	236
908	0.0007259	14	105	12	196
909	0.0004768	12	107	14	202
910	0.0004702	4	114	15	224
911	0.0008206	11	128	17	245
912	0.000506	2	132	16	262
913	0.0007274	43	160	16	277
914	0.0007457	32	136	28	240
915	0.0005389	5	124	23	243
916	0.0004883	8	113	16	218
917	0.0007267	5	145	27	285
918	0.0007953	21	135	17	249
919	0.0007625	26	152	25	278
920	0.000537	8	120	13	232
921	0.0004108	1	110	18	219
922	0.0008302	43	137	15	231
923	0.0007233	29	121	19	213
924	0.0007086	6	121	22	236
925	0.0004978	12	116	12	220
926	0.0004149	11	110	15	209
927	0.0007723	54	160	22	266
928	0.0004861	8	106	16	204
929	0.0006408	4	153	27	302
930	0.0005788	3	141	20	279
931	0.0007519	17	127	15	237
932	0.0005678	10	110	17	210
933	0.0004209	0	102	12	204
934	0.0005995	3	113	15	223
935	0.0007359	11	128	20	245
936	0.0007443	20	130	19	240
937	0.0006455	14	124	25	234
938	0.0007251	32	115	16	198
939	0.000578	2	125	19	248
940	0.0005451	5	118	17	231
941	0.0007762	20	134	16	248
942	0.0007578	13	120	19	227
943	0.0006227	20	121	16	222
944	0.0007472	22	116	15	210
945	0.0007223	7	109	13	211
946	0.0005849	1	117	22	233
947	0.0007491	14	117	12	220
948	0.0005025	5	106	15	207
949	0.0004685	5	113	16	221
950	0.0007661	17	115	12	213
951	0.0007488	22	120	26	218
952	0.0006991	9	102	14	195
953	0.0006267	5	103	16	201
954	0.0004526	0	104	13	208
955	0.0006997	77	185	28	293
956	0.0007506	20	118	13	216
957	0.0005504	37	121	28	205
958	0.0006908	20	108	12	196
959	0.0006071	37	148	22	259
960	0.0005063	17	123	15	229
961	0.0005913	22	125	16	228
962	0.0007798	53	151	17	249
963	0.000588	1	110	14	219
964	0.000749	14	110	16	206
965	0.00075	19	136	13	253
966	0.000733	33	127	16	221
967	0.0005726	62	153	21	244
968	0.000726	52	138	29	224
969	0.0005024	12	119	24	226
970	0.0006049	65	167	23	269
971	0.0007535	38	148	26	258
972	0.0005024	21	146	21	271
973	0.0004437	5	122	14	239
974	0.0006912	32	131	28	230
975	0.0007467	13	135	13	257
976	0.0008023	18	122	16	226
977	0.0007829	35	149	22	263
978	0.000632	27	127	19	227
979	0.0009439	7	134	15	261
980	0.0009456	16	117	22	218
981	0.0007463	9	113	13	217
982	0.0005535	27	125	16	223
983	0.0005624	29	120	12	211
984	0.0006055	5	111	15	217
985	0.000767	62	174	18	286
986	0.0005694	21	124	17	227
987	0.0004327	6	116	16	226
988	0.0006257	10	143	26	276
989	0.0007423	15	132	17	249
990	0.0007435	19	128	16	237
991	0.000431	2	119	19	236
992	0.0008925	8	128	23	248
993	0.0007841	16	143	25	270
994	0.0005651	11	119	24	227
995	0.0004041	2	97	15	192
996	0.0008136	14	127	15	240
997	0.0007326	14	115	20	216
998	0.000621	41	152	18	263
999	0.0005525	10	110	13	210
mean	0.000650552	21.572	127.11	18.088	232.648

## Sheet: PowerBalance_Bal
	time	SEq	Bal	Reg	Egal
0	0.0005599	34	145	20	256
1	0.0007435	121	196	24	271
2	0.0007221	7	111	14	215
3	0.0007219	21	123	16	225
4	0.0007326	6	124	20	242
5	0.0004472	7	101	16	195
6	0.000722	24	120	12	216
7	0.0007205	21	124	17	227
8	0.0005704	35	138	27	241
9	0.0005274	4	118	18	232
10	0.0005609	2	108	19	214
11	0.0004755	1	114	21	227
12	0.0005445	32	109	17	186
13	0.000595	47	153	19	259
14	0.0007531	3	120	17	237
15	0.0007832	16	118	19	220
16	0.0005748	4	113	20	222
17	0.000754	27	147	18	267
18	0.0005632	8	118	14	228
19	0.0006394	15	121	14	227
20	0.0007286	20	134	15	248
21	0.0005159	11	127	14	243
22	0.0007422	12	139	26	266
23	0.0004547	5	104	18	203
24	0.0007148	11	121	18	231
25	0.000538	6	107	15	208
26	0.0007457	18	113	13	208
27	0.00073	42	133	14	224
28	0.0005246	3	116	16	229
29	0.0007869	23	129	18	235
30	0.0005467	1	106	18	211
31	0.0005193	1	117	17	233
32	0.0007351	15	110	17	205
33	0.0005136	7	135	14	263
34	0.0007565	43	163	28	283
35	0.0005715	26	129	17	232
36	0.000484	6	104	21	202
37	0.0005767	4	128	15	252
38	0.000761	29	135	15	241
39	0.0007281	31	137	13	243
40	0.0006227	24	150	27	276
41	0.0009469	8	110	18	212
42	0.0007206	58	152	28	246
43	0.000906	28	121	16	214
44	0.0007821	14	113	24	212
45	0.00072	62	163	21	264
46	0.000612	37	157	17	277
47	0.00074	20	115	18	210
48	0.0007994	15	145	13	275
49	0.0007949	24	137	17	250
50	0.0007473	21	134	14	247
51	0.0008472	27	165	28	303
52	0.0006323	2	112	21	222
53	0.0007563	19	142	26	265
54	0.0006159	8	114	18	220
55	0.0005879	12	129	26	246
56	0.0007751	10	113	18	216
57	0.0004543	7	105	18	203
58	0.0007357	10	113	17	216
59	0.0007288	152	199	18	246
60	0.0007357	15	122	17	229
61	0.0007255	51	137	26	223
62	0.0007631	93	175	18	257
63	0.0004514	3	119	21	235
64	0.0006205	24	149	26	274
65	0.0007124	14	132	18	250
66	0.0006752	48	118	17	188
67	0.0005502	9	120	20	231
68	0.000517	6	117	15	228
69	0.0007404	8	131	15	254
70	0.0007478	39	129	28	219
71	0.0008436	27	112	14	197
72	0.0007362	7	121	18	235
73	0.0004361	6	117	11	228
74	0.0004984	5	136	17	267
75	0.0007592	23	120	12	217
76	0.0005477	23	141	16	259
77	0.0007735	15	106	17	197
78	0.000737	11	137	23	263
79	0.0007393	25	119	16	213
80	0.000551	11	118	16	225
81	0.0006412	7	128	22	249
82	0.0005147	12	163	27	314
83	0.0007609	15	117	14	219
84	0.0007216	28	120	17	212
85	0.0005076	7	104	14	201
86	0.0007488	39	126	17	213
87	0.0007674	30	126	15	222
88	0.0007105	38	136	17	234
89	0.0005633	0	106	16	212
90	0.0007532	67	160	19	253
91	0.0007387	31	138	28	245
92	0.0006624	72	166	23	260
93	0.0006538	10	124	15	238
94	0.000911	7	109	19	211
95	0.0007246	14	131	16	248
96	0.0005398	13	102	10	191
97	0.00049	1	135	16	269
98	0.0007636	25	132	15	239
99	0.000535	5	99	12	193
100	0.0005878	37	142	26	247
101	0.000771	20	149	26	278
102	0.0007323	29	127	28	225
103	0.0005879	33	128	24	223
104	0.0004919	12	112	16	212
105	0.0007503	3	117	12	231
106	0.0007391	32	137	17	242
107	0.0006411	22	153	27	284
108	0.0006309	74	152	16	230
109	0.0008068	36	136	18	236
110	0.0006077	11	106	11	201
111	0.0004621	15	112	13	209
112	0.0007352	24	134	19	244
113	0.0007624	15	99	17	183
114	0.0004803	8	96	19	184
115	0.0004956	18	122	23	226
116	0.0004871	16	146	15	276
117	0.0006317	7	126	24	245
118	0.000591	41	131	15	221
119	0.0005616	13	137	25	261
120	0.000498	23	133	16	243
121	0.000636	24	125	16	226
122	0.0007411	13	110	16	207
123	0.0005561	15	98	13	181
124	0.000773	19	101	17	183
125	0.0004961	8	120	15	232
126	0.0004853	9	103	16	197
127	0.0005231	2	101	29	200
128	0.0007299	15	140	16	265
129	0.0007807	23	152	20	281
130	0.0007458	23	127	12	231
131	0.0007358	21	123	29	225
132	0.0007821	9	115	16	221
133	0.0005296	17	128	20	239
134	0.0005303	3	108	27	213
135	0.0005731	33	135	14	237
136	0.0007601	11	122	15	233
137	0.0005784	7	129	14	251
138	0.0004408	10	111	12	212
139	0.0006319	57	154	18	251
140	0.0005216	2	125	29	248
141	0.0007057	43	154	29	265
142	0.000714	43	144	21	245
143	0.0007788	25	135	22	245
144	0.0004976	2	105	15	208
145	0.0006158	6	130	23	254
146	0.0007379	10	110	15	210
147	0.0007905	20	103	17	186
148	0.0007567	15	128	20	241
149	0.0004248	5	124	15	243
150	0.0007356	14	118	17	222
151	0.0005736	27	115	19	203
152	0.000477	3	110	14	217
153	0.000703	22	112	12	202
154	0.0006587	15	135	16	255
155	0.0007229	44	142	17	240
156	0.0005777	23	118	15	213
157	0.000734	23	125	19	227
158	0.0007288	8	130	26	252
159	0.0005244	3	122	18	241
160	0.0008559	11	118	19	225
161	0.0007469	27	116	15	205
162	0.0005203	14	113	14	212
163	0.0006565	7	137	25	267
164	0.0004266	2	95	19	188
165	0.0007827	23	118	22	213
166	0.0007098	14	140	17	266
167	0.0005897	40	107	13	174
168	0.0007444	32	160	26	288
169	0.0007457	4	123	13	242
170	0.0005275	13	123	18	233
171	0.00052	7	116	20	225
172	0.0006351	14	128	26	242
173	0.0007948	108	187	19	266
174	0.0007672	8	130	14	252
175	0.0007536	21	122	15	223
176	0.0005431	10	106	15	202
177	0.000521	2	114	18	226
178	0.0005142	3	121	25	239
179	0.0004218	0	117	15	234
180	0.0005763	20	146	23	272
181	0.0007643	30	135	15	240
182	0.0004418	18	110	12	202
183	0.0005585	4	118	16	232
184	0.0005724	54	134	17	214
185	0.0004995	6	118	16	230
186	0.000585	65	143	16	221
187	0.0005939	0	110	14	220
188	0.0008137	33	135	16	237
189	0.0005803	24	126	26	228
190	0.0004439	2	112	17	222
191	0.000517	7	121	14	235
192	0.0007407	9	117	17	225
193	0.0006214	5	132	25	259
194	0.0005232	18	126	12	234
195	0.0006136	22	124	19	226
196	0.0005663	45	143	24	241
197	0.0007716	11	120	20	229
198	0.0005056	15	120	22	225
199	0.0006979	28	140	22	252
200	0.0008123	16	111	25	206
201	0.0007452	15	120	17	225
202	0.000756	54	175	28	296
203	0.0004572	0	121	16	242
204	0.0004644	18	119	15	220
205	0.0007391	15	108	17	201
206	0.0007706	22	122	12	222
207	0.0007351	36	144	17	252
208	0.0004319	13	105	12	197
209	0.0007564	21	111	11	201
210	0.0007396	13	112	18	211
211	0.000718	9	140	18	271
212	0.0005205	32	140	17	248
213	0.0005251	9	108	20	207
214	0.0007546	22	130	13	238
215	0.0004336	2	104	14	206
216	0.000536	8	127	20	246
217	0.0007579	121	180	21	239
218	0.0007659	10	122	22	234
219	0.0007523	30	136	15	242
220	0.0007452	67	147	23	227
221	0.0005606	9	122	16	235
222	0.0005307	7	115	21	223
223	0.0005181	32	143	16	254
224	0.0006121	4	128	16	252
225	0.0007514	12	130	28	248
226	0.0007751	30	128	10	226
227	0.0007101	24	115	17	206
228	0.0004885	14	113	18	212
229	0.0005868	34	139	19	244
230	0.0006727	3	118	18	233
231	0.0007249	6	132	16	258
232	0.0007529	18	163	25	308
233	0.0006737	137	205	26	273
234	0.0004406	4	123	15	242
235	0.0006365	40	138	16	236
236	0.0004241	10	99	15	188
237	0.0007692	12	118	13	224
238	0.0005933	4	105	17	206
239	0.0007272	12	113	20	214
240	0.0006131	4	139	27	274
241	0.0007835	16	122	16	228
242	0.000493	3	100	15	197
243	0.0007588	21	141	13	261
244	0.0008793	27	146	15	265
245	0.0007643	32	143	16	254
246	0.0005558	32	133	13	234
247	0.0004341	1	118	14	235
248	0.0005285	19	132	16	245
249	0.0006492	13	115	18	217
250	0.0007161	33	131	19	229
251	0.0007296	19	114	15	209
252	0.000729	18	123	24	228
253	0.000493	7	106	14	205
254	0.0004172	2	130	14	258
255	0.0005838	48	146	28	244
256	0.0005809	24	127	29	230
257	0.0007001	39	147	23	255
258	0.0005169	3	105	18	207
259	0.0005138	3	109	16	215
260	0.0006267	23	128	16	233
261	0.0005399	56	141	16	226
262	0.000768	18	116	11	214
263	0.0005652	12	121	18	230
264	0.0004971	5	106	14	207
265	0.0007459	35	151	24	267
266	0.0005995	34	123	18	212
267	0.0006373	13	115	18	217
268	0.0007214	11	138	18	265
269	0.0006425	4	133	14	262
270	0.0005194	2	122	16	242
271	0.0007667	9	119	16	229
272	0.000634	19	122	27	225
273	0.0010683	28	128	17	228
274	0.0007111	15	123	15	231
275	0.0005989	43	145	28	247
276	0.0007449	29	135	15	241
277	0.0007424	28	119	13	210
278	0.0007846	23	136	17	249
279	0.0005283	9	134	26	259
280	0.0007894	33	149	22	265
281	0.0005741	24	139	25	254
282	0.0007652	8	118	22	228
283	0.0007242	23	117	13	211
284	0.0005474	2	104	20	206
285	0.0004574	3	114	13	225
286	0.0004386	4	123	14	242
287	0.0006059	23	117	17	211
288	0.0007225	78	167	17	256
289	0.000691	21	116	14	211
290	0.0006108	36	135	14	234
291	0.000795	113	173	16	233
292	0.0005944	14	104	14	194
293	0.0005285	52	149	18	246
294	0.0004579	1	113	15	225
295	0.00073	13	133	16	253
296	0.0007729	31	109	20	187
297	0.0006425	5	138	29	271
298	0.0007387	9	129	14	249
299	0.0007871	5	145	22	285
300	0.0004114	15	119	13	223
301	0.000465	4	105	12	206
302	0.0008862	21	102	20	183
303	0.0007385	21	120	13	219
304	0.0007288	31	111	16	191
305	0.0005131	16	126	24	236
306	0.0007327	125	203	18	281
307	0.0005876	36	156	29	276
308	0.0007426	49	129	21	209
309	0.000777	11	129	17	247
310	0.0007298	37	132	26	227
311	0.0005012	5	110	18	215
312	0.0005363	14	111	16	208
313	0.0007343	18	126	14	234
314	0.0009721	16	146	22	276
315	0.0005584	12	111	26	210
316	0.000625	33	119	14	205
317	0.0006168	0	117	29	234
318	0.0005145	3	116	18	229
319	0.0007296	13	120	17	227
320	0.0005406	33	124	15	215
321	0.0007152	16	125	15	234
322	0.0007338	57	146	19	235
323	0.0004673	2	120	16	238
324	0.0007314	25	133	15	241
325	0.000746	115	185	21	255
326	0.0007869	108	175	20	242
327	0.0005574	5	107	19	209
328	0.0004851	3	109	15	215
329	0.0006662	4	99	17	194
330	0.0007285	13	115	14	217
331	0.0004953	6	126	15	246
332	0.0004743	2	124	19	246
333	0.0007233	9	123	15	237
334	0.0008531	98	177	22	256
335	0.0007517	35	151	14	267
336	0.0006178	17	149	22	281
337	0.0007612	42	126	11	210
338	0.0007555	20	129	25	238
339	0.0010653	25	133	13	241
340	0.0004847	0	109	26	218
341	0.0007151	19	131	19	243
342	0.0005493	1	100	13	199
343	0.0007008	73	143	19	213
344	0.0005632	19	114	16	209
345	0.0005172	5	129	19	253
346	0.0007398	9	132	28	255
347	0.000437	6	121	18	236
348	0.0007465	7	120	21	233
349	0.0007088	8	97	15	186
350	0.0007194	47	148	26	249
351	0.0005472	43	119	16	195
352	0.0004859	7	123	23	239
353	0.000773	41	137	12	233
354	0.0004393	5	116	15	227
355	0.0004627	36	127	15	218
356	0.0005799	9	128	18	247
357	0.0007469	23	134	19	245
358	0.0006821	43	129	21	215
359	0.0007139	8	122	23	236
360	0.0005048	12	127	27	242
361	0.0005897	4	120	27	236
362	0.0008513	21	134	17	247
363	0.0008481	22	121	14	220
364	0.0006463	24	138	22	252
365	0.0007427	37	144	24	251
366	0.000616	20	126	14	232
367	0.0005517	1	116	19	231
368	0.0006155	1	114	16	227
369	0.0005347	15	116	15	217
370	0.0007584	24	115	12	206
371	0.000715	28	109	15	190
372	0.000613	6	106	15	206
373	0.0007367	34	130	15	226
374	0.0007713	20	134	19	248
375	0.0007707	17	112	15	207
376	0.0007032	69	130	17	191
377	0.0007311	11	115	15	219
378	0.0007343	11	117	13	223
379	0.0007303	22	135	20	248
380	0.0005251	2	114	18	226
381	0.0005578	9	122	16	235
382	0.0007488	23	115	14	207
383	0.0007406	65	153	15	241
384	0.0007733	17	147	21	277
385	0.0007387	41	132	16	223
386	0.0006162	16	126	22	236
387	0.0007205	45	133	22	221
388	0.0007188	68	146	18	224
389	0.000645	30	136	26	242
390	0.0007134	6	132	21	258
391	0.0005432	1	122	16	243
392	0.0007338	32	126	15	220
393	0.0005805	49	147	13	245
394	0.0004677	1	107	12	213
395	0.0006335	3	113	15	223
396	0.0007153	76	143	15	210
397	0.000745	22	114	24	206
398	0.0008126	51	122	14	193
399	0.0007487	25	119	29	213
400	0.0007585	16	109	16	202
401	0.0006664	2	122	28	242
402	0.0007324	21	130	16	239
403	0.0007394	25	115	16	205
404	0.0007378	17	130	16	243
405	0.0008098	16	137	29	258
406	0.0005413	40	124	19	208
407	0.0007454	57	167	26	277
408	0.0007481	74	141	20	208
409	0.0004031	8	117	12	226
410	0.0007215	19	122	21	225
411	0.0007242	17	105	16	193
412	0.0005974	13	118	13	223
413	0.0005489	1	106	14	211
414	0.0005934	19	114	15	209
415	0.00058	19	116	19	213
416	0.0007489	8	133	20	258
417	0.0005393	5	113	13	221
418	0.0005729	15	129	12	243
419	0.000805	21	122	14	223
420	0.0007611	26	134	15	242
421	0.0005535	4	115	16	226
422	0.0013832	0	118	18	236
423	0.0007011	12	124	13	236
424	0.0004438	17	114	13	211
425	0.0005781	53	145	14	237
426	0.0007443	6	138	17	270
427	0.0007224	66	160	25	254
428	0.0007684	12	125	26	238
429	0.0007539	14	124	17	234
430	0.0005246	6	103	15	200
431	0.0007899	16	128	17	240
432	0.0004977	3	93	14	183
433	0.0007199	13	112	17	211
434	0.0005914	49	136	19	223
435	0.0007301	27	129	21	231
436	0.0005038	8	111	13	214
437	0.0007432	17	121	27	225
438	0.0006492	8	110	21	212
439	0.0005736	38	139	18	240
440	0.0007833	13	119	14	225
441	0.0004934	15	111	13	207
442	0.0007769	3	114	11	225
443	0.0006359	9	111	16	213
444	0.0007465	37	126	17	215
445	0.0007491	41	132	21	223
446	0.0005202	8	108	17	208
447	0.0005641	12	129	29	246
448	0.0004504	3	109	15	215
449	0.0006299	2	110	20	218
450	0.0007201	28	121	20	214
451	0.00042	11	107	18	203
452	0.0007398	45	140	20	235
453	0.0007214	20	121	15	222
454	0.000921	17	155	16	293
455	0.0006259	31	133	17	235
456	0.0004909	6	115	18	224
457	0.000825	21	130	17	239
458	0.0005248	33	119	21	205
459	0.0005726	5	104	12	203
460	0.0005665	2	120	15	238
461	0.0007483	8	124	20	240
462	0.0005986	5	114	26	223
463	0.0005102	7	123	16	239
464	0.0005353	25	133	18	241
465	0.0007542	22	132	22	242
466	0.0006395	3	111	21	219
467	0.0005606	7	109	19	211
468	0.0007505	28	124	15	220
469	0.0005832	36	115	13	194
470	0.0006144	42	145	19	248
471	0.000587	4	121	12	238
472	0.0005666	34	140	15	246
473	0.0007433	48	161	16	274
474	0.0007864	6	112	20	218
475	0.0007813	28	112	14	196
476	0.0008589	5	126	13	247
477	0.0007648	22	125	15	228
478	0.0005504	4	118	23	232
479	0.0004868	5	121	16	237
480	0.0005541	4	123	13	242
481	0.0006159	4	106	17	208
482	0.0007477	17	123	16	229
483	0.0007262	23	133	18	243
484	0.0006147	6	122	18	238
485	0.0007437	55	141	14	227
486	0.0005857	5	113	16	221
487	0.0006276	45	142	22	239
488	0.0009519	19	157	29	295
489	0.000717	55	165	18	275
490	0.0005116	2	101	13	200
491	0.0005929	1	138	22	275
492	0.000717	35	135	20	235
493	0.0006135	7	131	16	255
494	0.0007297	69	146	15	223
495	0.000703	11	109	17	207
496	0.0007257	56	154	17	252
497	0.0004793	1	111	17	221
498	0.0004377	2	113	18	224
499	0.0008204	19	103	15	187
500	0.0007385	12	112	13	212
501	0.0007336	20	108	19	196
502	0.0005661	21	106	19	191
503	0.0005488	39	148	19	257
504	0.0007594	23	105	21	187
505	0.0007355	34	135	20	236
506	0.0005535	38	144	17	250
507	0.0007608	32	135	12	238
508	0.0007308	24	135	19	246
509	0.0007243	16	118	15	220
510	0.0006122	39	122	11	205
511	0.0007595	15	122	17	229
512	0.0007479	14	118	15	222
513	0.000571	6	130	19	254
514	0.0005679	37	122	17	207
515	0.0005793	1	112	20	223
516	0.0004548	32	117	16	202
517	0.0007801	46	147	19	248
518	0.0005075	10	96	15	182
519	0.000497	9	113	19	217
520	0.0007359	22	121	16	220
521	0.0006086	43	120	13	197
522	0.000492	2	113	14	224
523	0.0005724	4	116	16	228
524	0.0005229	18	125	13	232
525	0.000446	14	119	15	224
526	0.0007527	22	120	16	218
527	0.0005477	13	112	19	211
528	0.0006395	11	141	25	271
529	0.0005712	9	127	16	245
530	0.0005004	33	122	20	211
531	0.0004791	0	124	18	248
532	0.0005953	51	158	29	265
533	0.0005537	9	104	15	199
534	0.0004952	2	126	16	250
535	0.0005118	7	121	16	235
536	0.0007635	13	114	21	215
537	0.0007715	20	125	13	230
538	0.0007206	54	166	28	278
539	0.000734	18	139	20	260
540	0.0007505	21	123	22	225
541	0.0006073	5	144	16	283
542	0.0006521	25	132	14	239
543	0.0005111	0	113	18	226
544	0.0006881	37	140	18	243
545	0.0006043	3	126	27	249
546	0.0007325	61	148	18	235
547	0.0007484	31	122	16	213
548	0.0005631	0	113	18	226
549	0.00053	3	114	17	225
550	0.0005346	20	127	18	234
551	0.0004872	9	125	16	241
552	0.0007613	30	121	13	212
553	0.0005091	12	102	15	192
554	0.0005364	8	131	16	254
555	0.0005783	6	110	24	214
556	0.0007209	19	130	19	241
557	0.0004538	4	105	14	206
558	0.0007511	33	157	16	281
559	0.0007344	21	110	15	199
560	0.0005126	12	138	18	264
561	0.0004341	10	106	12	202
562	0.0008263	8	143	16	278
563	0.0007233	18	98	13	178
564	0.0007396	31	134	19	237
565	0.0005915	7	109	15	211
566	0.0004401	21	127	15	233
567	0.0007432	35	117	17	199
568	0.000726	46	145	25	244
569	0.000411	8	107	11	206
570	0.0005907	7	122	23	237
571	0.0005927	2	136	20	270
572	0.0007194	92	177	15	262
573	0.0007142	82	176	27	270
574	0.0006215	75	144	14	213
575	0.000585	42	143	28	244
576	0.0007771	74	155	18	236
577	0.0007567	31	120	19	209
578	0.0005695	3	128	16	253
579	0.0007171	48	154	25	260
580	0.0005886	21	126	26	231
581	0.0007647	58	150	21	242
582	0.0006243	42	139	23	236
583	0.0005831	9	108	17	207
584	0.0008713	12	147	21	282
585	0.0008015	13	116	17	219
586	0.0006908	0	132	21	264
587	0.0005182	2	117	16	232
588	0.0006602	1	142	28	283
589	0.0005373	24	106	14	188
590	0.0005335	12	132	15	252
591	0.0007325	2	123	14	244
592	0.000751	25	136	21	247
593	0.0006442	45	133	18	221
594	0.0007379	23	124	19	225
595	0.0008056	20	133	19	246
596	0.000758	16	110	14	204
597	0.0007196	5	112	13	219
598	0.0007384	28	125	18	222
599	0.0004529	3	118	18	233
600	0.0005522	23	116	16	209
601	0.0007357	4	114	13	224
602	0.0008913	16	140	29	264
603	0.0007347	64	155	17	246
604	0.0007594	11	114	16	217
605	0.0004972	14	114	17	214
606	0.0004531	2	98	22	194
607	0.0005642	13	125	16	237
608	0.0004492	15	102	15	189
609	0.000731	16	119	16	222
610	0.0006014	79	160	14	241
611	0.0005527	12	144	24	276
612	0.0006806	71	166	23	261
613	0.0005245	35	120	14	205
614	0.0006422	17	153	27	289
615	0.0007666	10	115	17	220
616	0.0007414	20	114	20	208
617	0.0005999	9	113	18	217
618	0.00073	19	128	25	237
619	0.0007702	10	128	14	246
620	0.0004935	16	142	19	268
621	0.0005476	8	123	24	238
622	0.0007559	73	137	17	201
623	0.000526	2	119	15	236
624	0.0007802	18	129	19	240
625	0.0006682	65	147	14	229
626	0.0007505	12	121	15	230
627	0.0007551	20	130	14	240
628	0.0007434	39	145	15	251
629	0.0005631	1	128	18	255
630	0.0007953	12	124	14	236
631	0.0006214	42	119	15	196
632	0.0005931	48	131	24	214
633	0.0004394	6	123	15	240
634	0.0004599	27	107	11	187
635	0.0007325	107	185	19	263
636	0.0007444	8	144	26	280
637	0.0004529	3	133	17	263
638	0.0005608	1	117	19	233
639	0.0006773	4	126	24	248
640	0.0004094	4	105	12	206
641	0.0006477	2	127	15	252
642	0.0007169	10	140	26	270
643	0.0007397	23	136	15	249
644	0.0006284	7	98	15	189
645	0.0005793	3	119	18	235
646	0.0007285	17	111	17	205
647	0.0007395	8	119	25	230
648	0.0004553	11	112	17	213
649	0.0007211	25	122	21	219
650	0.0005865	6	114	15	222
651	0.0007071	30	134	14	238
652	0.0007483	81	177	29	273
653	0.0007466	11	110	11	209
654	0.000742	33	145	18	257
655	0.000689	54	145	23	236
656	0.0005826	8	116	21	224
657	0.0005174	4	115	20	226
658	0.0004863	1	101	13	201
659	0.00074	6	118	17	230
660	0.000562	2	119	14	236
661	0.0005284	6	107	14	208
662	0.0006136	47	141	22	235
663	0.0005751	18	132	19	246
664	0.0005823	5	133	27	261
665	0.0004879	5	122	18	239
666	0.0006136	20	122	12	224
667	0.0006172	5	117	19	229
668	0.0007825	13	130	18	247
669	0.0007135	4	124	18	244
670	0.0005214	22	135	18	248
671	0.0006295	10	144	28	278
672	0.0007472	16	134	16	252
673	0.0005599	104	190	25	276
674	0.0005248	3	127	16	251
675	0.0005815	35	148	29	261
676	0.0007684	110	172	17	234
677	0.0008011	12	125	15	238
678	0.000795	15	128	26	241
679	0.0006155	58	144	18	230
680	0.0007161	71	139	16	207
681	0.0004982	6	119	23	232
682	0.0007153	18	128	17	238
683	0.0007608	11	105	18	199
684	0.0007309	18	109	13	200
685	0.0006033	3	138	21	273
686	0.0006842	104	160	18	216
687	0.000744	19	143	25	267
688	0.0005335	14	94	18	174
689	0.0008162	18	122	16	226
690	0.0007105	108	187	24	266
691	0.0007661	59	137	15	215
692	0.0005139	5	101	15	197
693	0.0005354	10	113	15	216
694	0.0005805	15	109	13	203
695	0.0007428	14	120	12	226
696	0.0007601	13	113	18	213
697	0.0007111	12	131	26	250
698	0.000761	41	146	23	251
699	0.0007588	6	121	17	236
700	0.000616	2	107	11	212
701	0.0007417	21	146	29	271
702	0.0005977	2	115	16	228
703	0.0007346	45	147	15	249
704	0.0005222	17	123	15	229
705	0.0005203	57	156	20	255
706	0.0007373	38	134	15	230
707	0.0006084	43	154	29	265
708	0.0007238	38	156	19	274
709	0.0007453	10	118	14	226
710	0.0007842	67	143	14	219
711	0.0006095	15	122	15	229
712	0.0007396	29	133	18	237
713	0.000461	11	128	20	245
714	0.0005806	18	137	15	256
715	0.0006984	15	103	15	191
716	0.0005345	7	101	16	195
717	0.0005115	14	115	13	216
718	0.0005485	21	131	18	241
719	0.0004498	11	109	13	207
720	0.0007052	45	124	16	203
721	0.0004263	20	125	14	230
722	0.0007201	12	121	13	230
723	0.0007151	12	118	19	224
724	0.0006779	3	125	16	247
725	0.0005028	6	120	25	234
726	0.0007732	8	125	24	242
727	0.0006331	29	152	25	275
728	0.0005037	1	123	23	245
729	0.0007229	54	142	15	230
730	0.0007855	14	121	16	228
731	0.0005043	34	116	18	198
732	0.0006005	6	129	15	252
733	0.0004963	1	139	15	277
734	0.0007829	8	105	16	202
735	0.0004663	2	123	14	244
736	0.000729	32	146	28	260
737	0.0007879	34	145	16	256
738	0.0005418	11	131	18	251
739	0.0007131	74	152	19	230
740	0.0007466	21	125	15	229
741	0.0007421	18	125	22	232
742	0.0006024	63	146	18	229
743	0.0005567	67	162	22	257
744	0.0007327	33	100	15	167
745	0.0007419	21	115	19	209
746	0.0007742	12	131	18	250
747	0.0005766	27	128	17	229
748	0.0007665	22	125	15	228
749	0.0006526	5	124	17	243
750	0.0007435	12	113	18	214
751	0.0008604	7	123	16	239
752	0.0005761	26	127	16	228
753	0.0004898	0	121	18	242
754	0.0006024	43	136	15	229
755	0.0006323	35	139	17	243
756	0.0005952	40	132	20	224
757	0.0005767	54	137	20	220
758	0.0007203	103	160	16	217
759	0.000691	6	112	12	218
760	0.000728	37	123	16	209
761	0.0005529	3	120	14	237
762	0.0007536	4	125	24	246
763	0.0004705	2	136	16	270
764	0.0005316	3	121	27	239
765	0.000649	13	125	17	237
766	0.0007458	19	137	15	255
767	0.0007556	55	148	16	241
768	0.0007406	11	119	15	227
769	0.000753	27	120	18	213
770	0.0005536	9	126	16	243
771	0.0006459	4	129	16	254
772	0.0004744	29	128	16	227
773	0.0006625	9	114	13	219
774	0.0007611	17	117	17	217
775	0.0005122	3	114	17	225
776	0.0004908	9	95	13	181
777	0.0005151	1	111	12	221
778	0.0007657	33	136	22	239
779	0.0006247	6	116	13	226
780	0.0007275	40	126	12	212
781	0.0005526	0	137	17	274
782	0.0007114	3	134	18	265
783	0.0007396	44	133	25	222
784	0.0006607	42	145	25	248
785	0.000509	5	133	17	261
786	0.00061	3	121	14	239
787	0.0007953	114	201	29	288
788	0.000714	78	161	21	244
789	0.000733	26	129	13	232
790	0.0005805	35	145	25	255
791	0.0005515	3	120	17	237
792	0.0007125	13	120	15	227
793	0.0007844	17	123	18	229
794	0.0007275	4	109	17	214
795	0.0007288	17	98	13	179
796	0.0005209	14	142	18	270
797	0.0005154	2	109	14	216
798	0.0006704	33	125	14	217
799	0.0006986	45	156	29	267
800	0.0005732	4	145	26	286
801	0.0006421	8	131	18	254
802	0.0004825	10	116	17	222
803	0.0009313	27	138	28	249
804	0.0007179	92	154	21	216
805	0.0007364	28	126	23	224
806	0.0007415	11	138	15	265
807	0.0007325	21	112	13	203
808	0.0005189	8	122	16	236
809	0.0006648	39	140	13	241
810	0.0007065	35	165	29	295
811	0.0006093	4	126	19	248
812	0.0004263	1	129	14	257
813	0.0005589	53	145	17	237
814	0.0005269	7	116	13	225
815	0.0007395	83	169	17	255
816	0.0007456	32	138	20	244
817	0.0006127	21	119	15	217
818	0.0007044	12	109	16	206
819	0.0005761	22	142	28	262
820	0.0007942	31	117	17	203
821	0.0007775	15	118	15	221
822	0.0004727	14	101	12	188
823	0.0007413	24	136	17	248
824	0.0007911	66	170	26	274
825	0.0008295	12	116	15	220
826	0.000617	12	108	13	204
827	0.0007253	12	107	13	202
828	0.0008044	24	125	28	226
829	0.0004975	24	128	13	232
830	0.0006018	1	94	13	187
831	0.0005535	25	141	18	257
832	0.0007706	18	122	14	226
833	0.0004104	2	115	16	228
834	0.0004249	6	109	12	212
835	0.0008095	46	160	21	274
836	0.000644	24	104	13	184
837	0.0005007	12	113	16	214
838	0.0007717	12	143	27	274
839	0.0005792	20	131	24	242
840	0.0007036	35	122	17	209
841	0.0004641	1	103	15	205
842	0.0005257	32	112	14	192
843	0.000723	33	133	22	233
844	0.0005906	40	147	14	254
845	0.0007739	39	132	14	225
846	0.0007611	6	117	17	228
847	0.0005695	2	118	17	234
848	0.0006338	19	119	20	219
849	0.0004554	5	111	14	217
850	0.000529	1	114	14	227
851	0.0007114	4	124	16	244
852	0.0006056	60	170	27	280
853	0.0004735	9	117	15	225
854	0.0005165	35	127	18	219
855	0.0006021	10	112	12	214
856	0.0007334	34	131	16	228
857	0.0007264	25	110	14	195
858	0.0004592	6	128	20	250
859	0.0007471	6	125	15	244
860	0.0004856	18	125	18	232
861	0.0005783	61	160	25	259
862	0.0005582	65	143	20	221
863	0.0005507	62	136	15	210
864	0.0006593	66	153	21	240
865	0.0007536	10	111	18	212
866	0.0004916	6	119	16	232
867	0.000522	0	125	23	250
868	0.0005334	32	146	15	260
869	0.0005735	4	115	22	226
870	0.0004737	5	116	15	227
871	0.0008282	15	125	14	235
872	0.0006735	16	126	17	236
873	0.0007889	13	126	17	239
874	0.0006145	3	112	16	221
875	0.0006028	8	112	15	216
876	0.0007728	26	139	19	252
877	0.0006365	34	148	25	262
878	0.000725	30	129	19	228
879	0.0007843	14	135	20	256
880	0.0005067	3	129	14	255
881	0.0005927	29	138	21	247
882	0.0007454	11	116	15	221
883	0.0007518	4	136	27	268
884	0.0005883	19	124	14	229
885	0.0005911	1	104	19	207
886	0.0005289	0	110	15	220
887	0.0004759	3	118	18	233
888	0.0007247	9	124	26	239
889	0.0007428	23	134	17	245
890	0.0006664	22	121	21	220
891	0.00069	10	122	15	234
892	0.0005529	0	110	23	220
893	0.00059	32	147	28	262
894	0.0006941	83	165	23	247
895	0.0007749	4	127	15	250
896	0.000706	63	160	19	257
897	0.0005697	19	121	18	223
898	0.000538	0	98	12	196
899	0.0007777	40	143	18	246
900	0.0006256	3	112	14	221
901	0.000573	8	109	14	210
902	0.0007223	43	148	20	253
903	0.0007884	35	142	14	249
904	0.0011841	23	124	16	225
905	0.0004495	3	106	15	209
906	0.0006274	22	136	14	250
907	0.0007522	34	135	15	236
908	0.0007716	14	105	12	196
909	0.0004935	12	107	14	202
910	0.0004585	4	114	15	224
911	0.0007501	11	128	17	245
912	0.0005063	2	132	16	262
913	0.0005779	43	160	16	277
914	0.0007452	32	136	28	240
915	0.0005382	5	124	23	243
916	0.0005307	8	113	16	218
917	0.0007275	5	145	27	285
918	0.000774	21	135	17	249
919	0.0007236	26	152	25	278
920	0.0005334	8	120	13	232
921	0.0004221	1	110	18	219
922	0.0007787	43	137	15	231
923	0.0007309	29	121	19	213
924	0.0007528	6	121	22	236
925	0.0004932	12	116	12	220
926	0.0004175	11	110	15	209
927	0.0007607	54	160	22	266
928	0.0004368	8	106	16	204
929	0.0006418	4	153	27	302
930	0.0007946	3	141	20	279
931	0.0007343	17	127	15	237
932	0.0006719	10	110	17	210
933	0.000417	0	102	12	204
934	0.0005265	3	113	15	223
935	0.0007586	11	128	20	245
936	0.0007924	20	130	19	240
937	0.0005919	14	124	25	234
938	0.0007792	32	115	16	198
939	0.0005714	2	125	19	248
940	0.0005666	5	118	17	231
941	0.0007373	23	132	23	241
942	0.0007249	13	120	19	227
943	0.0006044	20	121	16	222
944	0.0008113	22	116	15	210
945	0.0007441	7	109	13	211
946	0.0005722	1	117	22	233
947	0.0007327	14	117	12	220
948	0.0008087	5	106	15	207
949	0.0004366	5	113	16	221
950	0.0006619	17	115	12	213
951	0.0007864	22	120	26	218
952	0.0007093	9	102	14	195
953	0.0005927	5	103	16	201
954	0.0003929	0	104	13	208
955	0.0006873	77	185	28	293
956	0.0007368	20	118	13	216
957	0.0006191	37	121	28	205
958	0.0008052	20	108	12	196
959	0.0007508	37	148	22	259
960	0.0004953	17	123	15	229
961	0.0005817	22	125	16	228
962	0.0007653	53	151	17	249
963	0.0005571	1	110	14	219
964	0.0007439	9	115	16	221
965	0.0007926	19	136	13	253
966	0.0007201	33	127	16	221
967	0.0005617	62	153	21	244
968	0.0005298	52	138	29	224
969	0.0005101	12	119	24	226
970	0.0006107	65	167	23	269
971	0.0007403	38	148	26	258
972	0.0007537	17	144	21	271
973	0.0004987	5	122	14	239
974	0.0005826	32	131	28	230
975	0.0007684	13	135	13	257
976	0.0007696	18	122	16	226
977	0.00078	43	143	22	243
978	0.0006741	27	127	19	227
979	0.0007323	7	134	15	261
980	0.0007292	16	117	22	218
981	0.0007218	9	113	13	217
982	0.0005651	27	125	16	223
983	0.0005829	29	120	12	211
984	0.0005268	5	111	15	217
985	0.0007641	62	174	18	286
986	0.000578	21	124	17	227
987	0.0004607	6	116	16	226
988	0.0006539	10	143	26	276
989	0.0007459	15	132	17	249
990	0.0007053	19	128	16	237
991	0.0005816	2	119	19	236
992	0.0007862	8	128	23	248
993	0.0007457	16	143	25	270
994	0.0005649	11	119	24	227
995	0.0003871	2	97	15	192
996	0.0007452	14	127	15	240
997	0.0007511	14	115	20	216
998	0.0005736	41	152	18	263
999	0.0006191	10	110	13	210
mean	0.000648722	21.786	126.961	18.018	232.136
