# Supplementary material
Source: ML conference proceedings conference paper supplement (https://openreview.net/forum?id=2rAiDBJgR_)
Supplement: supplementary_material [file UD_size-20_test.xlsx]

## Sheet: GS_MaleOpt
	time	SEq	Bal	Reg	Egal
0	0.0003149	103	155	18	207
1	0.0001489	161	186	19	211
2	0.0001522	143	175	18	207
3	0.0001475	113	145	14	177
4	0.0001594	108	159	14	210
5	0.000149	123	159	19	195
6	0.0001646	87	137	16	187
7	0.0001456	132	152	16	172
8	0.000157	61	135	18	209
9	0.0001444	132	156	16	180
10	0.0001621	110	155	17	200
11	0.0001501	128	158	18	188
12	0.0002	77	151	14	225
13	0.000153	153	183	19	213
14	0.0001474	126	161	16	196
15	0.000159	120	157	16	194
16	0.0001432	145	174	18	203
17	0.0001497	152	172	18	192
18	0.0001651	122	164	18	206
19	0.00015	105	149	17	193
20	0.000177	116	162	18	208
21	0.000167	118	151	16	184
22	0.0001694	143	177	17	211
23	0.0001876	118	169	15	220
24	0.000156	102	148	14	194
25	0.0001536	117	157	19	197
26	0.0001615	137	167	17	197
27	0.0001585	76	137	16	198
28	0.0001542	121	161	18	201
29	0.0001584	167	186	17	205
30	0.0001537	94	150	15	206
31	0.0001988	76	137	15	198
32	0.0001502	108	161	18	214
33	0.0001529	110	155	15	200
34	0.0001727	86	151	17	216
35	0.0002399	98	153	16	208
36	0.0001559	137	177	17	217
37	0.0001483	138	166	17	194
38	0.0001485	156	182	19	208
39	0.0001704	132	176	16	220
40	0.0001544	100	154	16	208
41	0.0001499	104	143	14	182
42	0.0001587	120	159	17	198
43	0.0001583	128	171	18	214
44	0.0002171	121	155	17	189
45	0.000151	119	154	16	189
46	0.0001527	99	139	14	179
47	0.0001504	126	167	18	208
48	0.000157	103	146	15	189
49	0.0001541	144	170	16	196
50	0.0001639	85	146	15	207
51	0.0001485	126	164	18	202
52	0.0001469	150	171	19	192
53	0.0001681	92	152	14	212
54	0.0001531	114	158	14	202
55	0.0001532	134	166	18	198
56	0.0001582	116	157	17	198
57	0.000161	103	148	14	193
58	0.000172	74	145	15	216
59	0.0001643	99	154	16	209
60	0.0001681	99	154	17	209
61	0.0001444	140	164	18	188
62	0.0001579	92	151	17	210
63	0.0001549	141	161	16	181
64	0.0001793	117	159	18	201
65	0.0001555	99	152	16	205
66	0.0001492	108	148	16	188
67	0.0001723	127	162	19	197
68	0.0001546	84	151	18	218
69	0.0001604	119	159	18	199
70	0.0001459	148	165	16	182
71	0.000146	128	153	16	178
72	0.0001618	102	154	16	206
73	0.0001946	137	165	18	193
74	0.000157	127	159	17	191
75	0.0001519	95	130	14	165
76	0.0001506	124	156	19	188
77	0.0001666	99	157	16	215
78	0.0001446	149	174	17	199
79	0.0001506	116	159	19	202
80	0.0001693	138	171	18	204
81	0.0001645	114	162	17	210
82	0.0001578	79	141	17	203
83	0.0001721	137	160	15	183
84	0.0002147	115	161	19	207
85	0.0001621	108	148	15	188
86	0.0001484	154	186	19	218
87	0.0001624	118	153	16	188
88	0.0001454	138	165	19	192
89	0.000151	147	171	17	195
90	0.0001679	113	156	14	199
91	0.0001545	125	162	18	199
92	0.0001585	108	142	17	176
93	0.0001479	140	170	17	200
94	0.000155	92	152	15	212
95	0.0001648	100	154	14	208
96	0.0001545	97	153	16	209
97	0.0001531	121	160	16	199
98	0.0001492	139	169	18	199
99	0.0001608	115	150	13	185
100	0.0001542	114	156	18	198
101	0.0001467	129	157	17	185
102	0.00015	135	171	18	207
103	0.0001562	111	151	16	191
104	0.0001631	84	151	19	218
105	0.0001553	133	187	16	241
106	0.0001632	83	135	14	187
107	0.0001513	108	142	19	176
108	0.0001539	137	167	16	197
109	0.0001764	104	157	15	210
110	0.0001588	114	147	16	180
111	0.000155	105	144	16	183
112	0.0001593	85	147	14	209
113	0.0001586	98	147	14	196
114	0.0001532	119	146	18	173
115	0.0001687	119	156	18	193
116	0.0001479	128	151	19	174
117	0.0001553	139	173	19	207
118	0.0001645	93	144	17	195
119	0.000155	108	158	18	208
120	0.0002274	107	155	19	203
121	0.0001531	180	197	19	214
122	0.0001501	162	184	19	206
123	0.0001668	102	145	16	188
124	0.0001606	150	171	19	192
125	0.0001734	154	179	19	204
126	0.0001517	118	164	18	210
127	0.0002028	107	158	17	209
128	0.0001461	136	162	19	188
129	0.0001486	149	172	19	195
130	0.0001581	124	157	17	190
131	0.000149	143	166	18	189
132	0.0001523	138	169	17	200
133	0.0001492	89	139	15	189
134	0.0001493	158	180	18	202
135	0.0001543	155	175	16	195
136	0.0001662	111	161	16	211
137	0.0001642	116	155	19	194
138	0.0001508	142	165	14	188
139	0.0001689	93	139	18	185
140	0.0001613	117	162	14	207
141	0.0001572	125	161	17	197
142	0.0001607	132	172	17	212
143	0.0001503	115	160	15	205
144	0.0001622	97	140	16	183
145	0.0001529	94	155	16	216
146	0.0001474	145	167	18	189
147	0.0001542	103	146	18	189
148	0.0001691	104	152	19	200
149	0.0001564	149	185	16	221
150	0.0001611	138	174	16	210
151	0.000154	112	161	18	210
152	0.0001512	123	165	14	207
153	0.0001654	86	147	17	208
154	0.0001935	85	155	17	225
155	0.0002189	104	142	14	180
156	0.0001658	124	149	19	174
157	0.0001488	129	164	18	199
158	0.0001716	95	144	18	193
159	0.0001583	129	176	19	223
160	0.0001483	125	158	18	191
161	0.0001838	62	147	17	232
162	0.0001519	107	153	18	199
163	0.0001552	106	159	17	212
164	0.0001526	103	147	15	191
165	0.0001464	139	172	17	205
166	0.0001898	98	144	17	190
167	0.0001595	152	182	19	212
168	0.0001721	96	150	16	204
169	0.000165	137	172	19	207
170	0.0001558	126	166	19	206
171	0.0001492	140	169	19	198
172	0.0001631	93	140	19	187
173	0.0001723	120	165	19	210
174	0.0001535	113	158	19	203
175	0.0001553	110	159	15	208
176	0.0001832	77	152	19	227
177	0.0001478	162	185	19	208
178	0.0001532	129	151	17	173
179	0.000157	98	147	16	196
180	0.0001659	114	157	19	200
181	0.0001625	117	157	15	197
182	0.0001586	151	188	19	225
183	0.0001495	121	157	15	193
184	0.0001801	137	160	18	183
185	0.0001714	119	157	19	195
186	0.0001818	130	179	17	228
187	0.0001501	114	150	19	186
188	0.0001587	103	158	15	213
189	0.0001578	155	176	19	197
190	0.0001482	122	156	13	190
191	0.0001484	112	153	15	194
192	0.0001648	123	162	19	201
193	0.0001675	155	183	19	211
194	0.0001919	123	161	18	199
195	0.0001571	110	150	16	190
196	0.0001692	96	153	14	210
197	0.000151	111	152	16	193
198	0.0001607	73	152	18	231
199	0.0001558	116	154	18	192
200	0.0001685	74	142	15	210
201	0.0001547	76	135	16	194
202	0.0001608	87	143	17	199
203	0.0001511	138	168	18	198
204	0.00017	102	146	18	190
205	0.000156	107	145	14	183
206	0.0001531	117	166	18	215
207	0.0001892	107	155	16	203
208	0.0001675	49	133	14	217
209	0.0001546	128	160	16	192
210	0.0001497	108	152	18	196
211	0.0001497	137	175	19	213
212	0.000182	125	170	15	215
213	0.0001508	152	170	18	188
214	0.0001612	157	177	18	197
215	0.0001625	105	149	14	193
216	0.0001575	146	170	18	194
217	0.0001461	128	151	12	174
218	0.0001585	117	148	14	179
219	0.0003007	72	133	16	194
220	0.0001735	151	167	19	183
221	0.0001678	91	143	15	195
222	0.0001569	89	147	16	205
223	0.0001501	101	152	17	203
224	0.0001681	134	163	19	192
225	0.0001675	64	132	15	200
226	0.0001759	130	157	18	184
227	0.0001495	150	184	18	218
228	0.0001717	131	155	17	179
229	0.0001575	105	152	17	199
230	0.0001514	136	165	16	194
231	0.0001513	120	156	16	192
232	0.0001485	136	165	14	194
233	0.0001574	122	171	18	220
234	0.0001552	105	141	15	177
235	0.0001596	102	154	18	206
236	0.0001598	96	155	13	214
237	0.0001558	100	153	18	206
238	0.000154	108	151	17	194
239	0.0001492	137	176	19	215
240	0.0001555	116	161	17	206
241	0.0001609	107	158	17	209
242	0.0001617	140	170	19	200
243	0.0001608	124	164	18	204
244	0.000154	121	159	16	197
245	0.0001652	148	166	16	184
246	0.0001843	115	147	14	179
247	0.00018	118	160	16	202
248	0.0001526	116	160	19	204
249	0.0001593	78	135	14	192
250	0.0001918	77	133	16	189
251	0.0001776	106	154	19	202
252	0.0001657	143	175	19	207
253	0.000159	88	146	16	204
254	0.0001488	125	153	15	181
255	0.0001483	133	161	18	189
256	0.000155	151	170	18	189
257	0.0001509	138	166	19	194
258	0.0001485	118	149	19	180
259	0.0001494	116	150	15	184
260	0.0001594	110	159	16	208
261	0.0001986	127	154	15	181
262	0.0001578	129	170	18	211
263	0.00015	152	175	18	198
264	0.0001607	103	148	16	193
265	0.0001486	123	153	19	183
266	0.0001449	115	144	17	173
267	0.0001643	73	139	17	205
268	0.0001845	113	146	14	179
269	0.0001571	158	189	19	220
270	0.0001626	127	154	16	181
271	0.0001568	96	140	17	184
272	0.0001459	143	177	17	211
273	0.0001501	132	156	16	180
274	0.0001515	100	150	16	200
275	0.0001624	144	171	17	198
276	0.0001475	157	177	19	197
277	0.0001556	134	167	16	200
278	0.0001507	130	170	16	210
279	0.0001542	103	151	19	199
280	0.0001689	118	167	19	216
281	0.0001437	140	163	16	186
282	0.0001482	125	161	18	197
283	0.0002719	83	146	18	209
284	0.0001493	106	149	17	192
285	0.0001562	118	147	15	176
286	0.0001576	147	175	18	203
287	0.0001848	124	169	18	214
288	0.0001543	150	182	18	214
289	0.0001791	108	153	17	198
290	0.0001809	141	167	17	193
291	0.0001707	123	158	14	193
292	0.0001506	131	162	18	193
293	0.0001758	115	168	19	221
294	0.0001563	112	155	15	198
295	0.0001509	161	182	19	203
296	0.0001516	117	142	18	167
297	0.0001534	113	142	14	171
298	0.0001525	119	153	14	187
299	0.0001979	170	201	16	232
300	0.0001611	135	168	19	201
301	0.0001616	99	148	17	197
302	0.0001782	115	155	18	195
303	0.0001737	61	134	14	207
304	0.0001578	106	148	16	190
305	0.0001573	88	155	18	222
306	0.0001612	119	148	17	177
307	0.0001528	122	166	18	210
308	0.0001779	126	166	17	206
309	0.0001444	142	166	18	190
310	0.0001481	147	179	19	211
311	0.000159	142	176	16	210
312	0.0001553	90	139	15	188
313	0.0001558	111	159	17	207
314	0.0001498	143	169	19	195
315	0.0001546	85	141	19	197
316	0.0001475	132	155	17	178
317	0.0001638	79	141	17	203
318	0.0001518	135	171	17	207
319	0.0001654	121	159	16	197
320	0.0001645	117	154	13	191
321	0.0001546	120	157	15	194
322	0.0001843	97	157	15	217
323	0.0001411	177	190	19	203
324	0.0001851	139	169	16	199
325	0.0001961	111	161	19	211
326	0.0001588	109	161	17	213
327	0.0001557	110	158	14	206
328	0.0001875	105	148	15	191
329	0.0001524	125	171	18	217
330	0.0001509	119	150	18	181
331	0.0001565	114	157	17	200
332	0.0001539	115	152	17	189
333	0.0001504	98	142	13	186
334	0.000162	133	168	17	203
335	0.0001481	118	153	15	188
336	0.0001521	116	159	15	202
337	0.0001529	125	166	16	207
338	0.0001542	140	169	18	198
339	0.0001663	74	141	19	208
340	0.0001743	86	142	13	198
341	0.0001557	138	162	19	186
342	0.0001421	165	179	18	193
343	0.0001525	103	145	18	187
344	0.0001724	129	160	19	191
345	0.0001605	115	154	16	193
346	0.0001496	131	162	19	193
347	0.0001681	103	167	18	231
348	0.0001636	96	140	11	184
349	0.0001623	139	163	14	187
350	0.0001507	119	160	17	201
351	0.0001476	126	159	15	192
352	0.0001557	139	162	13	185
353	0.0001557	155	183	19	211
354	0.0001519	117	158	19	199
355	0.0001525	127	163	17	199
356	0.0001601	103	147	19	191
357	0.0001531	117	156	16	195
358	0.0001711	104	147	15	190
359	0.0001582	116	152	17	188
360	0.0001508	122	156	16	190
361	0.0001687	144	167	15	190
362	0.0001432	160	176	19	192
363	0.0002037	146	178	17	210
364	0.0001574	128	172	18	216
365	0.0001764	108	153	16	198
366	0.0001594	84	145	16	206
367	0.0002137	91	139	17	187
368	0.0001543	136	179	18	222
369	0.0001523	114	143	15	172
370	0.0001464	123	151	16	179
371	0.0001649	159	187	17	215
372	0.0001749	78	140	16	202
373	0.0001647	122	170	18	218
374	0.000157	106	156	18	206
375	0.0001484	133	165	17	197
376	0.0001476	143	174	18	205
377	0.0001549	101	162	16	223
378	0.0001449	161	178	19	195
379	0.0001897	106	152	15	198
380	0.0001639	99	142	14	185
381	0.0001606	121	165	17	209
382	0.0001475	116	149	18	182
383	0.0001722	127	158	18	189
384	0.0001497	142	172	17	202
385	0.0001515	136	170	15	204
386	0.0001494	112	157	19	202
387	0.0001637	78	136	15	194
388	0.0001579	118	156	15	194
389	0.0001637	72	144	18	216
390	0.0001711	98	140	16	182
391	0.0001619	98	152	15	206
392	0.0001481	117	151	17	185
393	0.0001623	104	139	16	174
394	0.0001477	149	173	18	197
395	0.0001573	132	172	19	212
396	0.0001564	122	168	16	214
397	0.0001555	117	163	17	209
398	0.0001768	133	161	18	189
399	0.0001679	115	155	19	195
400	0.0001501	122	169	19	216
401	0.0001491	156	181	19	206
402	0.0001593	56	129	17	202
403	0.0001902	93	160	15	227
404	0.0001651	135	172	17	209
405	0.0001596	130	166	16	202
406	0.0001537	109	156	18	203
407	0.000148	172	195	17	218
408	0.0001478	134	169	18	204
409	0.0001597	115	155	15	195
410	0.0001634	180	203	19	226
411	0.0001641	115	154	17	193
412	0.0001807	136	172	18	208
413	0.0001738	80	139	16	198
414	0.0001492	177	199	19	221
415	0.0001718	134	163	17	192
416	0.0001493	129	164	17	199
417	0.0001465	130	158	19	186
418	0.0001527	104	154	15	204
419	0.0001588	98	149	14	200
420	0.0001515	116	152	17	188
421	0.0001598	138	173	18	208
422	0.0001498	127	156	19	185
423	0.0001581	110	152	16	194
424	0.0001548	104	143	17	182
425	0.0001478	153	170	19	187
426	0.0001513	131	165	18	199
427	0.0001497	163	180	19	197
428	0.0001548	145	179	18	213
429	0.0001589	122	153	17	184
430	0.0001564	105	154	18	203
431	0.0001673	141	172	18	203
432	0.0001751	122	165	16	208
433	0.0001564	93	133	19	173
434	0.0001463	152	174	18	196
435	0.0001554	132	154	15	176
436	0.0001757	69	140	15	211
437	0.0001455	150	175	18	200
438	0.00015	169	191	19	213
439	0.0001536	113	146	16	179
440	0.0001538	130	170	17	210
441	0.000153	113	147	16	181
442	0.00016	81	131	16	181
443	0.0001514	124	160	16	196
444	0.0001811	79	139	15	199
445	0.0001621	69	137	17	205
446	0.0001505	108	154	18	200
447	0.0001583	110	163	16	216
448	0.0001617	125	168	19	211
449	0.0001682	118	148	15	178
450	0.0001646	106	152	17	198
451	0.0001511	127	160	18	193
452	0.0001883	97	145	14	193
453	0.0001675	112	160	14	208
454	0.0001495	121	158	17	195
455	0.0001624	142	174	17	206
456	0.0001534	128	163	19	198
457	0.0001619	141	181	19	221
458	0.0001517	140	161	17	182
459	0.0001772	100	152	16	204
460	0.0001789	153	184	19	215
461	0.0001512	141	157	19	173
462	0.0001995	140	165	18	190
463	0.0001581	97	146	19	195
464	0.000209	118	165	17	212
465	0.0001503	123	156	15	189
466	0.0001484	129	166	17	203
467	0.0001568	108	152	16	196
468	0.0001555	146	171	17	196
469	0.0001745	114	160	19	206
470	0.0001644	122	159	18	196
471	0.0001494	141	180	19	219
472	0.0001533	120	155	15	190
473	0.0001804	140	165	19	190
474	0.0001824	123	164	16	205
475	0.0001598	132	152	19	172
476	0.0001516	128	175	19	222
477	0.0001526	110	147	14	184
478	0.0002166	140	178	18	216
479	0.0001697	125	163	17	201
480	0.0001571	131	168	18	205
481	0.0001547	128	174	19	220
482	0.0001536	129	169	18	209
483	0.0001494	143	166	19	189
484	0.0001493	140	170	16	200
485	0.0001693	113	146	15	179
486	0.0001578	93	148	17	203
487	0.0001434	137	156	15	175
488	0.0001637	83	151	19	219
489	0.0001606	84	144	18	204
490	0.0001874	142	167	16	192
491	0.0001574	99	148	19	197
492	0.0001708	85	143	14	201
493	0.000158	95	141	16	187
494	0.000155	106	153	19	200
495	0.0001658	97	150	16	203
496	0.0001452	148	167	17	186
497	0.0001521	160	175	17	190
498	0.0001866	118	155	19	192
499	0.0001759	113	153	15	193
500	0.0001576	85	147	18	209
501	0.0001611	86	148	17	210
502	0.0001585	89	145	17	201
503	0.0001763	97	149	15	201
504	0.0001621	110	141	13	172
505	0.0001558	86	152	19	218
506	0.0001673	126	166	16	206
507	0.0001951	50	139	18	228
508	0.0001653	98	152	18	206
509	0.0001686	77	137	14	197
510	0.000166	115	143	17	171
511	0.0001575	98	158	15	218
512	0.0001587	101	134	12	167
513	0.0001541	107	149	16	191
514	0.0001552	109	152	15	195
515	0.0001505	122	152	15	182
516	0.0001622	87	147	16	207
517	0.0001589	126	157	19	188
518	0.0001545	103	159	16	215
519	0.000167	115	169	16	223
520	0.00015	154	189	19	224
521	0.0001571	104	153	19	202
522	0.0001628	87	141	15	195
523	0.0001566	130	154	18	178
524	0.0001539	81	139	15	197
525	0.0001761	101	149	15	197
526	0.0001583	122	165	19	208
527	0.0001584	139	168	19	197
528	0.0001592	103	151	17	199
529	0.0001484	147	173	18	199
530	0.0001494	122	160	18	198
531	0.0001512	136	176	19	216
532	0.0001958	104	153	16	202
533	0.0001668	93	148	15	203
534	0.0001569	120	156	14	192
535	0.0001602	82	139	12	196
536	0.0001495	153	180	19	207
537	0.0001924	135	167	17	199
538	0.0001513	134	168	18	202
539	0.0001924	110	153	17	196
540	0.0001571	95	147	17	199
541	0.0001468	127	160	17	193
542	0.000161	124	166	15	208
543	0.0001561	135	160	19	185
544	0.0001574	117	159	19	201
545	0.0001505	142	172	18	202
546	0.0001528	126	159	15	192
547	0.0001446	138	154	19	170
548	0.0001595	82	152	19	222
549	0.0001571	112	148	18	184
550	0.0001693	91	142	14	193
551	0.0001537	96	149	15	202
552	0.0001687	94	141	16	188
553	0.0001577	126	160	16	194
554	0.0001552	104	150	17	196
555	0.0001685	95	157	15	219
556	0.0001569	115	160	18	205
557	0.0001841	130	168	17	206
558	0.0001826	116	150	16	184
559	0.0001605	81	146	14	211
560	0.0001581	80	140	13	200
561	0.0001679	140	168	19	196
562	0.000171	58	132	15	206
563	0.0001768	126	166	18	206
564	0.0001622	117	168	18	219
565	0.0001482	143	176	18	209
566	0.0001744	74	148	15	222
567	0.0001479	147	166	17	185
568	0.0001529	143	181	17	219
569	0.0001639	93	136	17	179
570	0.000154	111	151	19	191
571	0.0001589	125	163	17	201
572	0.0001765	113	157	14	201
573	0.0001543	121	156	19	191
574	0.0001562	140	164	18	188
575	0.0001601	75	140	17	205
576	0.0001454	176	195	18	214
577	0.0001658	113	164	18	215
578	0.0001556	147	172	17	197
579	0.0001606	124	172	18	220
580	0.0001478	116	155	16	194
581	0.0001506	123	156	17	189
582	0.0001508	153	178	17	203
583	0.0001599	69	125	16	181
584	0.0001525	146	167	17	188
585	0.000161	62	135	18	208
586	0.0001611	79	136	15	193
587	0.0001699	69	137	18	205
588	0.0001614	100	165	19	230
589	0.0001907	158	180	17	202
590	0.0001508	138	169	17	200
591	0.0001524	120	165	18	210
592	0.000154	103	136	14	169
593	0.0001458	177	188	18	199
594	0.0001561	99	143	16	187
595	0.0001466	132	158	18	184
596	0.0001556	144	166	15	188
597	0.0001488	138	164	17	190
598	0.0001565	101	146	18	191
599	0.0001571	123	166	17	209
600	0.0001543	120	154	15	188
601	0.000156	123	152	17	181
602	0.0001854	101	151	14	201
603	0.0001492	144	171	19	198
604	0.0001679	74	144	19	214
605	0.0001625	121	164	18	207
606	0.000149	125	152	18	179
607	0.0001552	86	149	18	212
608	0.0001612	73	142	18	211
609	0.0001646	53	137	19	221
610	0.0001594	87	140	15	193
611	0.0001658	104	147	16	190
612	0.0001655	130	172	16	214
613	0.0001566	126	163	17	200
614	0.0001871	116	151	16	186
615	0.0001623	118	158	15	198
616	0.0001838	125	166	17	207
617	0.0001511	133	170	19	207
618	0.000176	141	168	18	195
619	0.0001702	101	153	17	205
620	0.000174	123	161	19	199
621	0.0001598	114	160	19	206
622	0.000156	137	166	19	195
623	0.0001937	163	183	19	203
624	0.0001481	124	155	15	186
625	0.0001484	119	156	17	193
626	0.0001526	134	160	18	186
627	0.0001493	131	171	19	211
628	0.0001761	123	166	18	209
629	0.0001552	132	168	16	204
630	0.0001735	131	152	14	173
631	0.0001462	138	166	17	194
632	0.0001764	80	142	18	204
633	0.0001549	138	171	18	204
634	0.0001561	125	166	19	207
635	0.000152	110	144	13	178
636	0.0001526	117	165	19	213
637	0.0001786	108	154	14	200
638	0.0001812	90	145	15	200
639	0.0001515	141	172	19	203
640	0.0001595	140	169	19	198
641	0.0001578	97	148	19	199
642	0.0001517	141	171	18	201
643	0.0001532	128	156	19	184
644	0.0001546	85	135	16	185
645	0.0001487	124	173	16	222
646	0.000196	102	146	16	190
647	0.0001537	145	179	18	213
648	0.0001547	105	153	18	201
649	0.0001453	157	171	19	185
650	0.0001632	115	155	19	195
651	0.0001736	72	142	16	212
652	0.0001489	147	167	19	187
653	0.0001494	136	166	17	196
654	0.0001637	111	151	19	191
655	0.0001555	114	159	15	204
656	0.0001471	133	160	18	187
657	0.0001508	130	151	16	172
658	0.0001566	135	164	19	193
659	0.0001594	124	166	19	208
660	0.0001811	144	169	19	194
661	0.0001515	156	182	18	208
662	0.0001567	86	138	14	190
663	0.0001579	101	162	15	223
664	0.0001517	131	164	18	197
665	0.000162	59	129	13	199
666	0.0001515	116	162	16	208
667	0.0001605	123	155	18	187
668	0.0001469	151	181	17	211
669	0.0001552	107	155	18	203
670	0.0001497	140	159	14	178
671	0.000152	120	171	18	222
672	0.0001562	117	158	19	199
673	0.0001476	147	168	19	189
674	0.0001505	97	141	13	185
675	0.0001468	135	156	18	177
676	0.0001573	94	144	15	194
677	0.0001621	90	141	15	192
678	0.0001514	144	167	19	190
679	0.0001425	159	170	16	181
680	0.0001522	99	153	16	207
681	0.0001692	116	158	17	200
682	0.0001557	108	143	16	178
683	0.0001592	99	161	15	223
684	0.0001536	99	154	15	209
685	0.0001921	186	201	19	216
686	0.0001497	131	161	18	191
687	0.0001525	151	187	18	223
688	0.0001757	90	140	15	190
689	0.0001526	141	173	19	205
690	0.0001634	87	145	15	203
691	0.00016	153	191	19	229
692	0.0001609	69	144	17	219
693	0.0001769	63	142	16	221
694	0.0001481	145	175	15	205
695	0.0001559	109	159	15	209
696	0.000152	101	143	14	185
697	0.0001575	93	158	19	223
698	0.000164	76	138	17	200
699	0.0001672	87	136	14	185
700	0.0001629	127	148	15	169
701	0.000153	141	173	18	205
702	0.0001564	65	130	15	195
703	0.0001578	128	167	17	206
704	0.000152	128	157	17	186
705	0.0001652	115	162	18	209
706	0.000154	131	170	17	209
707	0.0001583	132	165	16	198
708	0.0001565	137	166	17	195
709	0.0001684	127	168	18	209
710	0.00015	113	144	18	175
711	0.0001642	104	150	18	196
712	0.0001583	85	156	16	227
713	0.0001537	111	148	17	185
714	0.0001559	104	143	12	182
715	0.0001556	112	156	17	200
716	0.0001515	141	173	19	205
717	0.0001532	110	135	14	160
718	0.0001635	143	177	19	211
719	0.0001614	106	145	19	184
720	0.0001638	103	149	16	195
721	0.0001619	89	156	15	223
722	0.0001511	113	151	19	189
723	0.0001603	149	183	19	217
724	0.0001692	98	142	16	186
725	0.0001436	150	165	19	180
726	0.0001528	125	162	19	199
727	0.0001578	101	154	16	207
728	0.0001601	137	169	16	201
729	0.0001526	128	164	18	200
730	0.0001467	154	180	19	206
731	0.0001523	141	173	16	205
732	0.0001518	154	178	17	202
733	0.0001609	144	162	19	180
734	0.0001457	140	163	19	186
735	0.0001484	140	171	18	202
736	0.0001558	126	176	19	226
737	0.0001524	127	161	17	195
738	0.0001569	152	174	18	196
739	0.0001761	143	175	19	207
740	0.0001537	90	137	14	184
741	0.0001554	79	136	13	193
742	0.0001479	154	187	19	220
743	0.0001478	141	170	18	199
744	0.0001558	96	141	16	186
745	0.0001682	160	175	18	190
746	0.0001693	140	159	17	178
747	0.0001557	102	151	12	200
748	0.0001735	106	146	13	186
749	0.0001715	114	157	14	200
750	0.000163	132	158	18	184
751	0.0001549	76	140	15	204
752	0.0001509	137	167	18	197
753	0.0001563	114	156	19	198
754	0.0001713	142	176	16	210
755	0.0001485	144	167	16	190
756	0.0001525	130	158	18	186
757	0.0001512	135	154	19	173
758	0.0001451	154	171	18	188
759	0.0001573	107	155	16	203
760	0.0001545	136	156	18	176
761	0.0001588	113	159	19	205
762	0.0001517	111	149	17	187
763	0.0001516	120	163	18	206
764	0.0001541	123	168	17	213
765	0.0002035	56	127	17	198
766	0.0001608	125	157	16	189
767	0.0001556	142	171	18	200
768	0.0001489	133	160	16	187
769	0.0001501	116	158	15	200
770	0.0001464	135	158	17	181
771	0.000155	120	155	15	190
772	0.0001527	99	139	13	179
773	0.0001592	124	165	16	206
774	0.0001587	116	167	17	218
775	0.0001486	139	169	17	199
776	0.0001457	140	164	18	188
777	0.0001823	78	146	14	214
778	0.0001478	119	153	17	187
779	0.0001653	70	144	17	218
780	0.0001461	149	174	18	199
781	0.0001591	148	186	19	224
782	0.0001573	131	161	16	191
783	0.0001874	143	170	19	197
784	0.0001534	143	173	18	203
785	0.0001455	140	156	19	172
786	0.0001507	127	162	18	197
787	0.0001536	122	170	15	218
788	0.0002094	77	142	16	207
789	0.0001651	140	173	19	206
790	0.0001495	127	159	17	191
791	0.0001548	100	141	15	182
792	0.0001875	122	161	19	200
793	0.000163	106	148	14	190
794	0.0001561	90	142	19	194
795	0.0001511	105	155	15	205
796	0.0001738	119	150	16	181
797	0.0001523	117	150	13	183
798	0.0001647	64	138	17	212
799	0.0001623	132	170	19	208
800	0.0001542	96	138	15	180
801	0.0001447	137	162	18	187
802	0.0001494	147	157	16	167
803	0.0001486	139	173	17	207
804	0.00015	122	147	13	172
805	0.0001473	137	161	19	185
806	0.0001517	132	167	19	202
807	0.000158	99	154	15	209
808	0.0001458	161	179	17	197
809	0.0001564	110	155	19	200
810	0.0001563	145	180	19	215
811	0.0001656	95	136	14	177
812	0.0001506	168	188	17	208
813	0.0001524	97	151	17	205
814	0.0001567	115	162	18	209
815	0.0001639	118	172	15	226
816	0.0001482	129	156	16	183
817	0.0001563	98	152	17	206
818	0.0001774	78	155	19	232
819	0.0001613	117	157	19	197
820	0.0001529	102	144	17	186
821	0.0001549	152	183	17	214
822	0.0001574	127	166	17	205
823	0.0001585	117	153	15	189
824	0.0001758	123	151	17	179
825	0.0001527	123	167	15	211
826	0.0001533	110	153	19	196
827	0.0001518	125	156	14	187
828	0.0001641	76	137	14	198
829	0.000165	65	142	17	219
830	0.0001512	142	170	19	198
831	0.0001461	147	165	17	183
832	0.0001582	128	170	13	212
833	0.0001534	110	149	15	188
834	0.0001781	167	192	18	217
835	0.0001573	88	150	14	212
836	0.0001682	110	159	16	208
837	0.0001854	107	150	18	193
838	0.0001495	130	155	17	180
839	0.0001506	126	154	16	182
840	0.0001453	158	169	18	180
841	0.0001586	138	164	16	190
842	0.0001605	140	173	19	206
843	0.0001514	123	164	17	205
844	0.0001455	138	164	15	190
845	0.0001648	96	137	15	178
846	0.0002155	124	161	19	198
847	0.0001523	136	174	18	212
848	0.0001516	129	160	19	191
849	0.0001604	114	145	16	176
850	0.0001904	112	161	17	210
851	0.0001818	75	141	18	207
852	0.0001576	118	159	17	200
853	0.0001587	104	160	18	216
854	0.0001502	119	159	16	199
855	0.0001542	131	162	17	193
856	0.0001566	74	136	12	198
857	0.0001479	169	195	19	221
858	0.000159	126	162	17	198
859	0.0001734	69	143	19	217
860	0.0001493	142	178	17	214
861	0.0001532	116	150	18	184
862	0.0001494	141	168	17	195
863	0.0001527	115	155	16	195
864	0.0001487	125	152	17	179
865	0.0001517	136	171	19	206
866	0.0001518	133	164	19	195
867	0.0001684	125	160	19	195
868	0.0001695	80	139	16	198
869	0.000144	157	174	18	191
870	0.0001499	131	160	16	189
871	0.0001525	155	181	17	207
872	0.0001484	144	172	19	200
873	0.0001565	102	161	19	220
874	0.0001562	89	144	12	199
875	0.0001482	136	167	17	198
876	0.0001586	119	150	14	181
877	0.000154	127	161	15	195
878	0.0001602	141	172	18	203
879	0.0001612	148	179	19	210
880	0.0001596	153	176	19	199
881	0.000149	166	192	18	218
882	0.0001617	115	153	19	191
883	0.0001478	167	184	18	201
884	0.0001519	131	171	18	211
885	0.0001599	90	152	18	214
886	0.0001604	97	145	19	193
887	0.0001541	133	166	18	199
888	0.0001539	170	189	19	208
889	0.0002353	125	169	19	213
890	0.0001541	123	164	15	205
891	0.0001717	100	146	14	192
892	0.0001804	119	164	16	209
893	0.0002105	170	197	19	224
894	0.0001549	133	164	18	195
895	0.0001493	160	176	17	192
896	0.0001493	116	160	17	204
897	0.0001628	152	176	19	200
898	0.0001495	151	175	19	199
899	0.0001483	118	153	15	188
900	0.0001527	125	161	19	197
901	0.0001532	109	146	16	183
902	0.0001564	130	164	19	198
903	0.0001574	84	152	14	220
904	0.0001582	114	159	19	204
905	0.0001525	93	148	16	203
906	0.000157	124	165	17	206
907	0.0001594	164	192	19	220
908	0.0001573	115	153	16	191
909	0.000153	132	164	18	196
910	0.0001559	115	142	17	169
911	0.0001656	135	163	15	191
912	0.0001843	160	191	19	222
913	0.0001573	112	155	17	198
914	0.0001433	152	169	19	186
915	0.000157	107	150	18	193
916	0.0001546	113	161	16	209
917	0.0001705	79	144	17	209
918	0.0001599	104	148	14	192
919	0.0001637	130	161	16	192
920	0.0001495	171	187	19	203
921	0.0001588	118	153	18	188
922	0.0001575	110	155	15	200
923	0.0001963	112	168	19	224
924	0.0001552	130	163	16	196
925	0.0001509	128	172	19	216
926	0.0001641	112	151	17	190
927	0.0001556	105	158	19	211
928	0.0001546	131	166	19	201
929	0.0001525	100	153	16	206
930	0.0001527	152	177	19	202
931	0.0001523	143	170	16	197
932	0.0001542	127	158	16	189
933	0.0001665	87	137	11	187
934	0.0001588	95	146	16	197
935	0.0002033	135	165	16	195
936	0.0001525	136	174	17	212
937	0.0001613	119	155	19	191
938	0.0001478	140	168	18	196
939	0.0001559	119	159	19	199
940	0.0001501	141	172	16	203
941	0.0001514	154	174	18	194
942	0.0001566	86	150	19	214
943	0.00015	147	177	19	207
944	0.0001701	81	153	18	225
945	0.0001604	102	144	14	186
946	0.0001543	128	162	16	196
947	0.0001493	152	174	19	196
948	0.0001529	104	141	13	178
949	0.0001496	118	152	17	186
950	0.000174	137	158	16	179
951	0.0001502	118	144	15	170
952	0.0001469	138	160	17	182
953	0.0001537	114	152	18	190
954	0.0001793	121	159	15	197
955	0.0001587	86	147	19	208
956	0.0001739	118	157	15	196
957	0.0001825	113	152	17	191
958	0.0001579	138	180	17	222
959	0.000161	127	175	17	223
960	0.00015	126	164	16	202
961	0.000179	90	158	19	226
962	0.0001491	155	176	18	197
963	0.0001486	98	139	16	180
964	0.0001554	113	163	15	213
965	0.0001668	107	152	17	197
966	0.0001605	83	154	14	225
967	0.0001496	138	168	17	198
968	0.0001559	107	155	19	203
969	0.0001506	121	156	15	191
970	0.0001579	123	172	19	221
971	0.000153	110	149	18	188
972	0.000163	89	138	17	187
973	0.0001482	150	173	19	196
974	0.0001536	129	175	19	221
975	0.0001578	111	171	18	231
976	0.0001724	114	156	17	198
977	0.0001902	142	174	17	206
978	0.000168	112	159	15	206
979	0.0001595	88	142	17	196
980	0.0001479	143	177	19	211
981	0.0002105	101	152	14	203
982	0.000145	150	176	18	202
983	0.0001583	100	154	14	208
984	0.0001522	116	156	13	196
985	0.0001949	74	136	18	198
986	0.0001602	129	165	14	201
987	0.0001564	150	175	19	200
988	0.0001635	150	178	18	206
989	0.000166	68	135	16	202
990	0.0001753	52	142	19	232
991	0.0001511	111	146	15	181
992	0.000159	106	154	14	202
993	0.0001621	115	160	16	205
994	0.0001493	139	162	18	185
995	0.00015	120	153	16	186
996	0.000147	130	161	18	192
997	0.0001821	93	150	19	207
998	0.000156	157	187	17	217
999	0.000156	133	160	18	187
mean	0.000160368	119.212	159.05	16.916	198.888

## Sheet: GS_FemaleOpt
	time	SEq	Bal	Reg	Egal
0	0.0002123	49	133	16	217
1	0.0002129	75	143	16	211
2	0.0001931	40	135	15	230
3	0.0001885	95	138	14	181
4	0.0001945	89	153	13	217
5	0.0001737	61	136	17	211
6	0.0001884	56	126	17	196
7	0.0001812	104	146	15	188
8	0.0002684	47	131	18	215
9	0.0002194	85	139	12	193
10	0.0001883	76	148	18	220
11	0.000183	73	137	15	201
12	0.0001828	24	136	16	248
13	0.0002089	53	134	18	215
14	0.0001931	57	139	17	221
15	0.000185	50	132	17	214
16	0.0002163	59	142	17	225
17	0.0002082	108	153	14	198
18	0.0001748	28	134	19	240
19	0.0001816	86	144	14	202
20	0.0001907	55	134	17	213
21	0.0001932	68	136	14	204
22	0.0001816	59	138	12	217
23	0.0002026	68	145	15	222
24	0.0001818	102	148	14	194
25	0.0001907	65	136	13	207
26	0.0001869	54	140	16	226
27	0.0001796	76	137	16	198
28	0.0001916	90	147	17	204
29	0.0002418	120	159	14	198
30	0.0001793	66	146	14	226
31	0.0001873	23	125	15	227
32	0.0002578	108	161	18	214
33	0.000199	82	144	17	206
34	0.0001747	65	138	17	211
35	0.0001826	98	153	16	208
36	0.0001978	61	143	15	225
37	0.0001781	67	137	11	207
38	0.0001945	91	157	19	223
39	0.0001804	8	136	18	264
40	0.0001833	52	138	16	224
41	0.0001965	52	125	17	198
42	0.0001755	37	130	15	223
43	0.0001939	53	143	17	233
44	0.0001933	23	127	17	231
45	0.000179	80	141	14	202
46	0.0001822	99	139	14	179
47	0.0001821	68	143	14	218
48	0.0001945	72	138	14	204
49	0.0001857	62	135	14	208
50	0.0001825	67	140	16	213
51	0.00019	69	132	14	195
52	0.0001774	77	137	19	197
53	0.0001791	51	140	19	229
54	0.0001844	76	144	14	212
55	0.0001856	108	156	16	204
56	0.0001844	40	129	19	218
57	0.0001837	103	148	14	193
58	0.0001799	34	135	16	236
59	0.000183	76	145	14	214
60	0.0001988	79	144	18	209
61	0.0002014	107	149	13	191
62	0.0001853	92	151	17	210
63	0.0001964	58	131	15	204
64	0.0001764	37	133	18	229
65	0.0001831	99	152	16	205
66	0.0002705	51	126	17	201
67	0.0002071	90	143	13	196
68	0.0001801	65	147	18	229
69	0.0002142	119	159	18	199
70	0.0001964	94	139	16	184
71	0.0001822	122	151	16	180
72	0.0001932	38	136	18	234
73	0.0001855	92	142	16	192
74	0.0001742	25	123	19	221
75	0.0001798	95	130	14	165
76	0.0001898	106	143	14	180
77	0.000211	69	148	19	227
78	0.0001883	93	143	15	193
79	0.0001865	69	137	16	205
80	0.0001904	69	154	18	239
81	0.000183	69	141	17	213
82	0.0001814	79	141	17	203
83	0.0001738	32	128	19	224
84	0.0001807	59	141	15	223
85	0.0001947	64	132	17	200
86	0.0002358	92	152	14	212
87	0.000393	118	153	16	188
88	0.000184	84	148	15	212
89	0.0001869	25	140	18	255
90	0.000188	95	149	14	203
91	0.0001961	97	149	19	201
92	0.0001805	80	134	19	188
93	0.0001788	20	133	19	246
94	0.0001833	74	144	18	214
95	0.0002052	100	154	14	208
96	0.0001791	62	141	15	220
97	0.00019	66	143	17	220
98	0.0001789	104	150	17	196
99	0.0001753	45	134	14	223
100	0.0001751	59	136	18	213
101	0.0002165	88	145	14	202
102	0.0001767	41	126	17	211
103	0.0001863	55	135	14	215
104	0.0002105	84	151	19	218
105	0.0002115	81	167	19	253
106	0.0001851	83	135	14	187
107	0.000188	46	121	15	196
108	0.0001913	83	145	18	207
109	0.0001835	54	137	14	220
110	0.0001772	69	133	16	197
111	0.0001848	77	135	13	193
112	0.0001976	52	140	13	228
113	0.0001834	41	130	19	219
114	0.0001817	95	135	15	175
115	0.0001767	38	129	15	220
116	0.0001723	49	121	15	193
117	0.0002315	39	125	11	211
118	0.0001796	61	131	14	201
119	0.0001902	45	141	17	237
120	0.0002042	58	134	14	210
121	0.0001887	69	141	16	213
122	0.0001968	95	155	17	215
123	0.0002021	62	137	15	212
124	0.0001771	60	121	12	182
125	0.0001858	39	135	19	231
126	0.0001865	60	140	15	220
127	0.0001834	43	138	17	233
128	0.0001776	37	129	18	221
129	0.0001954	114	158	17	202
130	0.0002165	87	142	17	197
131	0.000179	75	144	16	213
132	0.0001798	75	143	18	211
133	0.0001776	41	124	15	207
134	0.0001757	54	131	14	208
135	0.0002135	87	148	13	209
136	0.0001827	53	143	18	233
137	0.000182	96	146	18	196
138	0.0001888	122	161	13	200
139	0.0001859	93	139	18	185
140	0.0001928	117	162	14	207
141	0.0001815	67	136	18	205
142	0.0001973	112	162	17	212
143	0.0001791	11	134	19	257
144	0.0001827	97	140	16	183
145	0.0001939	53	140	16	227
146	0.000193	75	141	17	207
147	0.0001842	77	135	17	193
148	0.0001822	83	147	17	211
149	0.000242	42	138	18	234
150	0.0002006	111	158	13	205
151	0.0001835	90	150	18	210
152	0.0002044	123	165	14	207
153	0.0001882	86	147	17	208
154	0.000216	85	155	17	225
155	0.0001833	49	123	13	197
156	0.0001882	50	115	15	180
157	0.0002202	129	164	18	199
158	0.0001859	95	144	18	193
159	0.0001964	129	176	19	223
160	0.0001769	47	134	18	221
161	0.0001886	62	147	17	232
162	0.0001828	69	134	15	199
163	0.000182	92	151	17	210
164	0.0001916	42	128	16	214
165	0.0002113	105	157	17	209
166	0.0001741	66	127	15	188
167	0.0001789	42	136	18	230
168	0.000185	78	145	15	212
169	0.0001848	116	164	19	212
170	0.0001771	67	143	16	219
171	0.0001895	119	160	19	201
172	0.0001793	82	135	19	188
173	0.000197	47	127	17	207
174	0.0001756	38	124	16	210
175	0.0001937	54	139	16	224
176	0.0001826	54	138	19	222
177	0.0001809	71	134	16	197
178	0.0001795	73	132	15	191
179	0.0001862	98	147	16	196
180	0.000185	80	145	18	210
181	0.0002013	99	148	17	197
182	0.0001794	41	146	17	251
183	0.0001831	102	147	15	192
184	0.0001856	108	151	16	194
185	0.0001839	119	157	19	195
186	0.0001832	47	141	18	235
187	0.0002054	86	139	12	192
188	0.000209	65	144	13	223
189	0.0001938	88	144	18	200
190	0.0001884	98	148	13	198
191	0.0001784	54	136	19	218
192	0.000213	93	149	16	205
193	0.0001981	43	138	17	233
194	0.0001797	80	137	16	194
195	0.0002083	61	133	19	205
196	0.0001846	70	141	14	212
197	0.0001827	69	137	16	205
198	0.0001863	65	149	18	233
199	0.0001832	76	131	15	186
200	0.0001805	74	142	15	210
201	0.0001744	53	127	18	201
202	0.0001809	87	143	17	199
203	0.0001941	81	154	18	227
204	0.0001827	55	131	16	207
205	0.000184	38	129	17	220
206	0.000203	48	133	19	218
207	0.000191	74	144	17	214
208	0.0001873	49	133	14	217
209	0.0001779	29	133	19	237
210	0.0002175	57	119	16	181
211	0.0001767	72	151	19	230
212	0.0001956	55	140	18	225
213	0.0001807	88	144	15	200
214	0.0001773	67	140	17	213
215	0.0002303	105	149	14	193
216	0.0001864	47	128	18	209
217	0.0001741	52	128	18	204
218	0.0001798	47	132	17	217
219	0.00019	72	133	16	194
220	0.0002026	113	154	16	195
221	0.0001912	91	143	15	195
222	0.0001886	33	133	19	233
223	0.0001849	81	140	16	199
224	0.0001865	112	146	12	180
225	0.0001766	64	132	15	200
226	0.0001818	113	145	14	177
227	0.0001858	80	148	14	216
228	0.0001916	115	147	14	179
229	0.0002019	105	152	17	199
230	0.0001825	77	139	18	201
231	0.00018	36	122	16	208
232	0.0001807	71	140	19	209
233	0.0001902	62	151	17	240
234	0.0001933	84	133	11	182
235	0.00018	102	154	18	206
236	0.0001879	96	155	13	214
237	0.0001806	68	143	16	218
238	0.0001936	67	133	18	199
239	0.000182	78	149	13	220
240	0.0001811	70	147	15	224
241	0.0001827	87	149	18	211
242	0.0001906	78	155	15	232
243	0.0001836	100	153	14	206
244	0.0001874	86	144	17	202
245	0.0001784	52	140	18	228
246	0.0001851	85	142	19	199
247	0.0001831	97	155	17	213
248	0.000171	38	124	16	210
249	0.0001815	34	129	18	224
250	0.0002056	77	133	16	189
251	0.0001762	49	132	19	215
252	0.0001754	54	136	12	218
253	0.0001826	56	140	19	224
254	0.0001797	102	142	14	182
255	0.0002007	59	139	18	219
256	0.0002042	69	142	15	215
257	0.0001889	76	147	15	218
258	0.0002363	92	140	19	188
259	0.0001994	83	144	18	205
260	0.0001913	81	143	16	205
261	0.0001866	77	141	13	205
262	0.0001834	26	135	16	244
263	0.0002359	74	140	16	206
264	0.0001783	9	129	19	249
265	0.0001796	74	139	17	204
266	0.0001766	50	127	19	204
267	0.0001935	43	124	15	205
268	0.0001838	63	137	16	211
269	0.0001813	50	131	15	212
270	0.0001899	127	154	16	181
271	0.0001774	70	130	17	190
272	0.0002018	17	134	17	251
273	0.0001755	69	134	18	199
274	0.0001808	56	141	19	226
275	0.000177	78	135	15	192
276	0.0002044	100	154	16	208
277	0.0001749	44	143	19	242
278	0.0001852	48	139	18	230
279	0.0002077	103	151	19	199
280	0.0001851	47	141	19	235
281	0.0001809	73	141	15	209
282	0.0001939	51	140	15	229
283	0.0001776	21	127	19	233
284	0.0001987	97	145	17	193
285	0.000179	47	122	12	197
286	0.0001862	112	161	18	210
287	0.0001847	71	145	16	219
288	0.0001773	54	137	18	220
289	0.0001829	52	135	16	218
290	0.0001949	52	141	18	230
291	0.0001815	81	143	14	205
292	0.0001811	73	142	19	211
293	0.0001881	70	151	19	232
294	0.0001839	38	134	15	230
295	0.0002264	51	141	16	231
296	0.0001801	96	134	13	172
297	0.0001785	89	134	13	179
298	0.0002005	79	135	13	191
299	0.0002118	87	166	17	245
300	0.0002136	64	133	12	202
301	0.000177	55	135	16	215
302	0.0001814	59	139	13	219
303	0.0001852	61	134	14	207
304	0.0001936	95	139	12	183
305	0.0001861	82	152	17	222
306	0.0001919	105	144	16	183
307	0.0001897	75	142	16	209
308	0.0002557	103	155	13	207
309	0.0001903	87	141	15	195
310	0.0002644	79	160	18	241
311	0.0002193	21	136	18	251
312	0.0001847	76	133	14	190
313	0.0002043	83	149	14	215
314	0.0001843	106	146	18	186
315	0.0001817	85	141	19	197
316	0.0001761	69	128	14	187
317	0.0001769	40	124	17	208
318	0.0002148	106	153	13	200
319	0.0002134	61	141	18	221
320	0.0001869	117	154	13	191
321	0.0001787	96	152	19	208
322	0.0001769	19	123	19	227
323	0.0001853	82	151	14	220
324	0.0001855	51	126	16	201
325	0.0001768	20	127	18	234
326	0.0002033	50	135	18	220
327	0.0001909	58	147	17	236
328	0.0001763	43	123	16	203
329	0.0001874	113	162	18	211
330	0.0001744	53	129	15	205
331	0.0001905	114	157	17	200
332	0.000209	60	137	16	214
333	0.0001867	98	142	13	186
334	0.0001928	121	162	17	203
335	0.0002126	79	146	16	213
336	0.0001826	56	138	16	220
337	0.0001863	98	152	15	206
338	0.0001859	88	146	13	204
339	0.0002007	74	141	19	208
340	0.000184	86	142	13	198
341	0.0001824	116	146	17	176
342	0.0001856	61	136	13	211
343	0.0001808	59	125	18	191
344	0.0001774	41	132	18	223
345	0.0001828	58	137	15	216
346	0.0001776	71	139	16	207
347	0.0001941	22	142	19	262
348	0.0001742	82	136	12	190
349	0.0001879	121	158	14	195
350	0.0001851	70	146	19	222
351	0.0002047	97	148	12	199
352	0.0002099	60	141	17	222
353	0.0001781	10	139	18	268
354	0.0001783	69	136	17	203
355	0.0001826	65	139	19	213
356	0.0001822	86	138	18	190
357	0.0001833	107	151	16	195
358	0.0001833	87	141	15	195
359	0.0001888	39	122	15	205
360	0.0001908	30	129	18	228
361	0.0001822	82	146	13	210
362	0.000191	160	176	19	192
363	0.0001863	55	143	19	231
364	0.0001875	71	143	17	215
365	0.0001833	89	148	15	207
366	0.0001956	39	130	17	221
367	0.0001822	56	130	18	204
368	0.0002091	71	146	16	221
369	0.000174	41	129	17	217
370	0.0002246	106	147	15	188
371	0.0001941	87	153	14	219
372	0.0001777	78	140	16	202
373	0.0001884	68	148	19	228
374	0.0001859	83	144	15	205
375	0.0002005	70	141	18	212
376	0.0001795	44	135	18	226
377	0.0002072	79	148	16	217
378	0.0001811	78	141	17	204
379	0.0002049	93	149	14	205
380	0.000181	56	134	19	212
381	0.0001823	51	133	16	215
382	0.0001853	107	144	18	181
383	0.0001772	73	139	14	205
384	0.0001843	62	140	17	218
385	0.000224	63	140	19	217
386	0.0002128	112	157	19	202
387	0.0002045	60	128	16	196
388	0.0001947	49	130	14	211
389	0.0001807	57	141	18	225
390	0.0001872	51	129	18	207
391	0.0002335	74	137	12	200
392	0.000185	76	140	18	204
393	0.0001787	43	118	18	193
394	0.0001842	77	146	13	215
395	0.0001842	43	135	18	227
396	0.0001847	103	157	16	211
397	0.0001956	71	148	17	225
398	0.0001967	102	152	18	202
399	0.0001853	107	151	18	195
400	0.0002065	59	137	17	215
401	0.0001913	85	153	15	221
402	0.0001819	56	129	17	202
403	0.0001784	26	139	18	252
404	0.0001956	46	141	19	236
405	0.0001934	45	137	15	229
406	0.0001778	47	131	13	215
407	0.000191	86	156	17	226
408	0.0001817	89	151	14	213
409	0.0001979	81	141	13	201
410	0.0001865	64	148	13	232
411	0.0001801	48	134	19	220
412	0.0001893	82	147	18	212
413	0.0001804	80	139	16	198
414	0.0001798	69	132	17	195
415	0.0001916	134	163	17	192
416	0.0001825	74	140	17	206
417	0.0001784	11	119	19	227
418	0.0001848	31	133	17	235
419	0.0001881	98	149	14	200
420	0.000187	101	146	15	191
421	0.000183	83	151	17	219
422	0.0001811	34	125	18	216
423	0.0001778	39	128	16	217
424	0.0001844	79	138	16	197
425	0.000221	97	141	14	185
426	0.0001812	78	139	14	200
427	0.0001806	63	130	14	197
428	0.0001966	55	151	17	247
429	0.000189	122	153	17	184
430	0.0002114	67	148	17	229
431	0.0001925	83	154	19	225
432	0.0001859	85	143	16	201
433	0.0001725	36	112	17	188
434	0.0001822	113	161	15	209
435	0.0001778	68	129	17	190
436	0.0001752	45	130	16	215
437	0.0001922	124	164	16	204
438	0.0001817	70	138	15	206
439	0.0001848	49	128	16	207
440	0.0002013	74	147	15	220
441	0.0001794	9	117	16	225
442	0.0001892	81	131	16	181
443	0.000182	50	135	19	220
444	0.0002244	79	139	15	199
445	0.0001965	69	137	17	205
446	0.0001944	23	126	19	229
447	0.0001783	53	138	18	223
448	0.0002271	30	135	19	240
449	0.0001781	66	132	16	198
450	0.000172	52	130	15	208
451	0.0002145	79	142	13	205
452	0.0001801	75	141	17	207
453	0.0001995	90	152	17	214
454	0.0001779	73	134	14	195
455	0.0001764	51	138	17	225
456	0.0001847	81	141	15	201
457	0.0001838	51	130	18	209
458	0.0001892	58	139	19	220
459	0.0001828	83	142	14	201
460	0.0001749	28	136	18	244
461	0.0001796	73	132	19	191
462	0.0001791	77	144	17	211
463	0.0002212	97	146	19	195
464	0.000189	86	153	19	220
465	0.0001824	100	150	15	200
466	0.0001841	47	137	18	227
467	0.0001823	81	141	16	201
468	0.0001965	56	141	19	226
469	0.000198	60	141	17	222
470	0.0001825	101	147	17	193
471	0.0001921	80	148	17	216
472	0.0001835	104	150	15	196
473	0.0001845	98	143	16	188
474	0.0002046	93	153	16	213
475	0.000186	114	150	19	186
476	0.0002227	24	131	16	238
477	0.0001758	90	139	14	188
478	0.0001768	95	149	17	203
479	0.0001874	98	149	16	200
480	0.0001783	59	135	13	211
481	0.0001787	74	149	17	224
482	0.0001919	111	161	15	211
483	0.0001825	22	124	18	226
484	0.0001926	37	139	15	241
485	0.0001835	82	134	15	186
486	0.0001914	59	131	13	203
487	0.0001847	75	139	18	203
488	0.0001794	35	133	19	231
489	0.0001833	84	144	18	204
490	0.0001903	72	144	15	216
491	0.0001767	86	139	15	192
492	0.0001808	20	131	18	242
493	0.0002013	95	141	16	187
494	0.0001806	87	151	19	215
495	0.0002003	80	148	16	216
496	0.0001938	53	134	16	215
497	0.0001764	20	138	19	256
498	0.0001973	118	155	19	192
499	0.0001799	51	137	17	223
500	0.0001834	26	125	18	224
501	0.0001853	54	134	16	214
502	0.0001791	66	138	17	210
503	0.000182	67	142	19	217
504	0.000179	92	135	12	178
505	0.0001871	75	145	19	215
506	0.0002139	95	155	19	215
507	0.0001834	41	135	18	229
508	0.000207	64	139	15	214
509	0.0001974	36	124	17	212
510	0.0001805	115	143	17	171
511	0.0001877	77	149	15	221
512	0.0001738	29	116	14	203
513	0.0001817	97	144	14	191
514	0.0001927	90	146	14	202
515	0.0002064	122	152	15	182
516	0.000177	26	131	17	236
517	0.0001765	13	132	19	251
518	0.0001802	20	137	19	254
519	0.0001854	71	153	17	235
520	0.0002098	54	145	14	236
521	0.0001853	104	153	19	202
522	0.0001829	87	141	15	195
523	0.0001844	97	140	18	183
524	0.0002322	47	131	15	215
525	0.0001797	33	124	17	215
526	0.0001902	62	144	18	226
527	0.0002118	117	155	16	193
528	0.0002181	35	127	16	219
529	0.0001846	92	154	19	216
530	0.0001784	77	142	14	207
531	0.0001824	77	148	13	219
532	0.0002309	52	141	17	230
533	0.000199	71	142	15	213
534	0.0001786	85	143	17	201
535	0.0001823	82	139	12	196
536	0.0001961	93	151	18	209
537	0.0001776	50	133	17	216
538	0.0001761	25	124	17	223
539	0.000182	56	132	15	208
540	0.0001824	66	137	16	208
541	0.0002287	87	148	15	209
542	0.000191	86	144	19	202
543	0.0001783	62	132	12	202
544	0.0001803	76	134	19	192
545	0.0001967	114	157	15	200
546	0.0001772	60	134	18	208
547	0.0001888	63	124	15	185
548	0.0001828	49	139	16	229
549	0.0001803	74	128	16	182
550	0.0001863	91	142	14	193
551	0.0001892	52	136	15	220
552	0.0001803	43	123	17	203
553	0.0001789	52	137	19	222
554	0.0001893	104	150	17	196
555	0.0002017	50	142	17	234
556	0.0001837	104	155	14	206
557	0.0001933	82	147	17	212
558	0.0001854	116	150	16	184
559	0.0001824	61	138	18	215
560	0.0002157	56	131	14	206
561	0.0001882	78	146	19	214
562	0.0001864	58	132	15	206
563	0.0002028	91	151	15	211
564	0.0001831	81	142	17	203
565	0.0001913	76	150	17	224
566	0.000183	39	141	15	243
567	0.0001846	90	143	15	196
568	0.000181	33	137	15	241
569	0.0003905	65	121	12	177
570	0.0002067	91	148	18	205
571	0.0001868	74	153	18	232
572	0.0001858	95	152	14	209
573	0.0001962	42	123	15	204
574	0.0001845	57	125	13	193
575	0.0001852	75	140	17	205
576	0.0001819	92	148	14	204
577	0.0002	86	150	13	214
578	0.0002022	82	149	19	216
579	0.0001965	20	140	19	260
580	0.0001812	102	150	16	198
581	0.0001815	40	128	17	216
582	0.0001887	85	153	14	221
583	0.0001901	46	121	16	196
584	0.0001726	45	134	18	223
585	0.0001896	62	135	18	208
586	0.0001842	79	136	15	193
587	0.0001826	41	125	16	209
588	0.0001842	65	145	16	225
589	0.0001825	50	145	19	240
590	0.0001971	114	161	17	208
591	0.0001884	89	150	14	211
592	0.0001858	74	127	14	180
593	0.0002108	65	134	19	203
594	0.0001882	52	127	13	202
595	0.0001751	29	116	19	203
596	0.0001787	85	146	13	207
597	0.0002231	84	150	19	216
598	0.000185	80	134	12	188
599	0.0001859	90	154	17	218
600	0.0002066	77	142	16	207
601	0.0001768	70	139	15	208
602	0.0001937	82	139	12	196
603	0.0001857	110	155	19	200
604	0.0001818	64	142	18	220
605	0.0001852	78	144	18	210
606	0.0001897	100	140	18	180
607	0.0001827	44	135	19	226
608	0.0001835	39	129	18	219
609	0.000178	53	137	19	221
610	0.0002139	87	140	15	193
611	0.0001829	104	147	16	190
612	0.0002245	52	148	16	244
613	0.0001973	72	143	13	214
614	0.0002475	92	137	15	182
615	0.0002074	25	139	19	253
616	0.0001775	72	137	13	202
617	0.0002006	111	157	17	203
618	0.0001773	69	139	14	209
619	0.0001804	52	133	18	214
620	0.0001902	80	138	15	196
621	0.0001827	99	155	18	211
622	0.0001842	54	135	16	216
623	0.0001829	81	138	13	195
624	0.0001877	77	138	18	199
625	0.0001963	111	154	17	197
626	0.0002074	76	142	15	208
627	0.0002271	65	146	19	227
628	0.0001808	69	139	16	209
629	0.0001831	39	140	16	241
630	0.0001831	131	152	14	173
631	0.0002326	97	144	17	191
632	0.0001818	71	139	18	207
633	0.0001888	54	135	16	216
634	0.0001796	87	147	15	207
635	0.0002072	110	144	13	178
636	0.0001796	62	138	16	214
637	0.0002249	36	138	18	240
638	0.0001807	65	134	14	203
639	0.0001782	66	140	15	214
640	0.0001891	55	136	15	217
641	0.0001783	24	131	19	238
642	0.0001908	109	157	13	205
643	0.0001913	89	137	16	185
644	0.0001864	57	125	15	193
645	0.0002106	85	152	12	219
646	0.0001936	102	146	16	190
647	0.000181	67	141	13	215
648	0.0002048	52	131	16	210
649	0.0001816	66	132	19	198
650	0.0001852	20	118	19	216
651	0.0001844	72	142	16	212
652	0.0001869	110	143	17	176
653	0.0001814	84	142	13	200
654	0.0002289	78	135	13	192
655	0.0001883	80	151	15	222
656	0.0001865	35	121	18	207
657	0.0001768	72	118	17	164
658	0.0002056	91	140	13	189
659	0.0001926	99	156	16	213
660	0.0001959	109	152	19	195
661	0.0002201	50	135	15	220
662	0.0001781	81	135	15	189
663	0.0001801	19	133	17	247
664	0.0001897	131	164	18	197
665	0.0001772	59	129	13	199
666	0.0001955	105	158	16	211
667	0.000188	84	145	19	206
668	0.000178	63	146	17	229
669	0.0001934	107	155	18	203
670	0.0001872	64	139	16	214
671	0.0001847	51	147	17	243
672	0.0001771	75	138	19	201
673	0.0001871	101	143	17	185
674	0.0001883	97	141	13	185
675	0.0001838	26	122	14	218
676	0.0001773	94	144	15	194
677	0.0001824	58	128	16	198
678	0.0001729	39	125	16	211
679	0.0001856	107	152	15	197
680	0.000203	81	143	14	205
681	0.0001845	73	149	17	225
682	0.0001773	67	135	19	203
683	0.0002045	78	155	15	232
684	0.0002358	53	136	18	219
685	0.0001797	39	128	18	217
686	0.0001775	51	124	13	197
687	0.0001855	92	163	16	234
688	0.0001789	57	125	14	193
689	0.000226	20	138	19	256
690	0.0001895	44	124	16	204
691	0.0001937	61	144	13	227
692	0.0001974	32	127	17	222
693	0.0001812	63	142	16	221
694	0.0001806	67	140	14	213
695	0.00018	74	141	17	208
696	0.0001854	101	143	14	185
697	0.0001771	43	130	13	217
698	0.0001921	8	121	17	234
699	0.0001806	87	136	14	185
700	0.0001855	83	136	15	189
701	0.0001804	98	159	17	220
702	0.0001748	28	117	17	206
703	0.0001838	91	149	17	207
704	0.0001848	105	144	14	183
705	0.0001837	73	145	17	217
706	0.0001896	79	147	14	215
707	0.0001858	101	157	15	213
708	0.0002392	84	141	18	198
709	0.0001803	32	130	14	228
710	0.0001858	80	134	16	188
711	0.000183	104	150	18	196
712	0.0001805	64	150	14	236
713	0.000181	93	142	17	191
714	0.0001828	80	138	16	196
715	0.0001769	36	124	15	212
716	0.0001943	74	144	16	214
717	0.0001758	67	122	17	177
718	0.0001793	55	134	19	213
719	0.0001878	106	145	19	184
720	0.0001884	89	144	13	199
721	0.0001968	89	156	15	223
722	0.000193	86	132	14	178
723	0.0002179	74	147	16	220
724	0.0001856	98	142	16	186
725	0.0002019	100	144	14	188
726	0.0001834	83	141	13	199
727	0.0002289	77	144	13	211
728	0.000195	86	149	17	212
729	0.0001771	56	126	14	196
730	0.0001903	85	151	16	217
731	0.0002168	76	147	14	218
732	0.0001828	65	145	16	225
733	0.0001803	89	135	11	181
734	0.0001893	106	155	18	204
735	0.0001911	118	154	18	190
736	0.0001871	75	150	18	225
737	0.0001953	73	139	16	205
738	0.0001876	68	133	11	198
739	0.0001934	100	155	16	210
740	0.0001995	90	137	14	184
741	0.0001819	51	125	12	199
742	0.0001843	85	145	14	205
743	0.0001872	69	141	19	213
744	0.0001784	79	133	13	187
745	0.0001799	55	130	16	205
746	0.0001872	69	134	19	199
747	0.0001842	102	151	12	200
748	0.0001845	106	146	13	186
749	0.0001841	48	141	17	234
750	0.0001901	49	136	18	223
751	0.00018	66	135	14	204
752	0.0001827	121	157	15	193
753	0.0001867	37	128	15	219
754	0.0002121	91	157	16	223
755	0.000201	103	152	15	201
756	0.0001896	102	147	14	192
757	0.0001753	67	124	16	181
758	0.0001851	82	135	14	188
759	0.0001852	33	125	17	217
760	0.0001943	102	143	16	184
761	0.0001737	25	123	18	221
762	0.0001783	74	135	15	196
763	0.000195	67	141	18	215
764	0.0001775	59	137	18	215
765	0.0001848	56	127	17	198
766	0.0001892	109	144	14	179
767	0.0001823	64	136	17	208
768	0.0001869	113	152	14	191
769	0.0001794	24	126	18	228
770	0.0001777	62	133	16	204
771	0.0002077	67	143	16	219
772	0.0001828	66	129	15	192
773	0.0002231	83	142	15	201
774	0.000197	31	139	18	247
775	0.0002173	111	153	15	195
776	0.0002001	32	125	18	218
777	0.0001888	78	146	14	214
778	0.0001834	119	153	17	187
779	0.0001807	16	128	19	240
780	0.0001825	43	143	19	243
781	0.0001853	55	149	16	243
782	0.0001917	102	149	14	196
783	0.0001834	39	131	18	223
784	0.0001824	69	141	19	213
785	0.0001821	89	134	14	179
786	0.0001834	24	131	16	238
787	0.0001909	101	165	17	229
788	0.0002113	62	134	17	206
789	0.0001899	3	130	18	257
790	0.0001861	69	140	15	211
791	0.0001859	81	136	15	191
792	0.0001772	57	119	13	181
793	0.0001883	106	148	14	190
794	0.0001773	79	140	19	201
795	0.000187	105	155	15	205
796	0.0001745	18	119	17	220
797	0.0001856	100	145	16	190
798	0.0001819	64	138	17	212
799	0.0002004	51	136	19	221
800	0.0001983	50	126	15	202
801	0.0001825	129	160	18	191
802	0.0001749	68	131	15	194
803	0.0003996	93	155	15	217
804	0.0002137	65	135	14	205
805	0.0001789	43	131	17	219
806	0.0001945	101	148	18	195
807	0.0001912	89	151	14	213
808	0.0001808	47	145	19	243
809	0.0001785	75	146	14	217
810	0.0001878	84	152	18	220
811	0.0001731	20	117	19	214
812	0.0001867	92	167	15	242
813	0.0001871	97	151	17	205
814	0.00019	75	140	18	205
815	0.0001828	55	143	19	231
816	0.0001768	41	130	19	219
817	0.0001818	83	148	16	213
818	0.0001919	59	144	17	229
819	0.0001807	66	127	15	188
820	0.0001773	58	131	18	204
821	0.0001887	76	152	19	228
822	0.0001829	34	132	19	230
823	0.0001914	98	146	15	194
824	0.0001879	82	132	14	182
825	0.0001798	41	139	18	237
826	0.0001925	82	135	14	188
827	0.0001933	70	142	19	214
828	0.0001877	46	125	17	204
829	0.0001759	65	142	17	219
830	0.0001963	73	135	12	197
831	0.0001919	64	137	16	210
832	0.0001812	57	145	15	233
833	0.0001807	58	134	18	210
834	0.0001991	81	154	18	227
835	0.0002392	73	144	16	215
836	0.0001867	71	142	14	213
837	0.0001744	49	129	17	209
838	0.000177	75	128	14	181
839	0.0001781	42	126	19	210
840	0.0001837	64	137	17	210
841	0.000185	77	137	13	197
842	0.0001858	73	142	15	211
843	0.0001763	63	143	16	223
844	0.0001961	94	151	13	208
845	0.0001879	82	132	15	182
846	0.000204	106	149	17	192
847	0.0001841	61	146	15	231
848	0.0001757	67	134	16	201
849	0.0001916	91	137	13	183
850	0.0001819	59	139	16	219
851	0.0001775	55	136	18	217
852	0.0001815	87	142	17	197
853	0.0001869	91	158	17	225
854	0.0001945	119	159	16	199
855	0.0001956	94	149	17	204
856	0.0001817	42	127	16	212
857	0.0001813	76	147	16	218
858	0.0001894	59	140	18	221
859	0.000178	46	135	18	224
860	0.0002027	70	148	17	226
861	0.0001759	70	126	14	182
862	0.0002123	97	146	13	195
863	0.0001866	39	133	16	227
864	0.0001873	74	137	16	200
865	0.0002069	31	131	18	231
866	0.0002269	39	130	17	221
867	0.0001798	17	124	16	231
868	0.0001833	80	139	16	198
869	0.0001947	128	159	14	190
870	0.0001915	117	153	16	189
871	0.000184	88	149	16	210
872	0.0001757	7	118	19	229
873	0.0001935	102	161	19	220
874	0.000205	63	139	17	215
875	0.0001796	64	139	16	214
876	0.0002026	119	150	14	181
877	0.0001825	65	140	14	215
878	0.0001843	104	157	19	210
879	0.000197	26	127	16	228
880	0.0001961	86	147	15	208
881	0.0001834	55	149	15	243
882	0.0002038	63	133	15	203
883	0.0001818	52	137	19	222
884	0.0001999	77	149	15	221
885	0.0001747	10	126	17	242
886	0.0001774	19	122	17	225
887	0.0001886	97	160	17	223
888	0.0001836	83	145	16	207
889	0.0001869	58	141	15	224
890	0.0001989	68	147	15	226
891	0.0001852	100	146	14	192
892	0.0001898	72	145	13	218
893	0.0001814	18	141	19	264
894	0.0001881	102	157	17	212
895	0.0002145	50	137	17	224
896	0.0001887	100	153	16	206
897	0.0001963	64	134	14	204
898	0.0002087	110	151	13	192
899	0.0001859	118	153	15	188
900	0.0001859	40	129	14	218
901	0.000215	30	122	15	214
902	0.0001811	42	133	18	224
903	0.0001779	2	127	18	252
904	0.0001998	114	159	19	204
905	0.0001793	74	143	19	212
906	0.0001823	64	141	13	218
907	0.0001896	42	133	17	224
908	0.0001794	50	134	13	218
909	0.0001824	38	133	19	228
910	0.0001814	81	130	16	179
911	0.0001994	102	155	15	208
912	0.0001754	54	136	12	218
913	0.0001899	62	139	15	216
914	0.0001864	85	146	16	207
915	0.0001844	107	150	18	193
916	0.0001796	43	132	15	221
917	0.0001941	79	144	17	209
918	0.0001814	104	148	14	192
919	0.0001806	98	148	13	198
920	0.0002296	70	145	17	220
921	0.000178	31	131	16	231
922	0.0001829	63	132	18	201
923	0.0001795	61	147	18	233
924	0.0002218	60	135	14	210
925	0.0001909	101	164	16	227
926	0.0001932	50	125	13	200
927	0.0002209	43	130	18	217
928	0.0001806	61	137	17	213
929	0.0001911	82	148	16	214
930	0.000193	134	168	19	202
931	0.0001783	3	126	19	249
932	0.0001802	82	138	16	194
933	0.0001804	59	131	15	203
934	0.0002113	95	146	16	197
935	0.000184	79	146	19	213
936	0.0001789	53	141	19	229
937	0.0001859	66	128	14	190
938	0.0001776	60	135	13	210
939	0.0002077	86	144	17	202
940	0.0001922	76	149	14	222
941	0.0001906	72	136	18	200
942	0.0001821	44	131	13	218
943	0.0001954	47	139	14	231
944	0.0002248	48	136	15	224
945	0.0001813	53	128	12	203
946	0.0001938	63	141	19	219
947	0.0001918	70	140	14	210
948	0.0001723	58	128	19	198
949	0.0001868	90	139	14	188
950	0.0001831	80	139	14	198
951	0.0001796	71	130	17	189
952	0.0001854	79	129	10	179
953	0.0002155	87	138	14	189
954	0.0001811	86	144	15	202
955	0.0001814	74	140	15	206
956	0.0001854	108	149	15	190
957	0.0001856	75	133	13	191
958	0.0002083	105	171	17	237
959	0.0001892	71	154	16	237
960	0.000194	126	164	16	202
961	0.0001874	43	141	19	239
962	0.0001973	44	141	19	238
963	0.0001752	10	113	15	216
964	0.0001887	61	146	16	231
965	0.0001832	73	145	17	217
966	0.0002224	65	150	14	235
967	0.0001779	46	136	14	226
968	0.0002045	76	142	17	208
969	0.0001844	76	140	15	204
970	0.0001882	69	151	18	233
971	0.0001897	76	138	17	200
972	0.0002007	64	132	15	200
973	0.0002062	90	148	17	206
974	0.0001834	72	148	16	224
975	0.000183	70	150	17	230
976	0.0001816	19	122	18	225
977	0.0001844	44	130	18	216
978	0.000184	99	154	15	209
979	0.0001801	48	128	17	208
980	0.0001972	73	151	19	229
981	0.0001836	85	147	19	209
982	0.000206	106	157	17	208
983	0.0002385	73	145	13	217
984	0.0001833	58	136	16	214
985	0.0001952	74	136	18	198
986	0.0002213	73	148	16	223
987	0.0001768	52	126	16	200
988	0.0002069	89	154	18	219
989	0.0001771	61	131	16	201
990	0.0001852	52	142	19	232
991	0.0001893	81	136	13	191
992	0.0001854	91	148	12	205
993	0.0001808	86	145	16	204
994	0.0001885	46	129	13	212
995	0.0001866	120	153	16	186
996	0.0001945	25	131	19	237
997	0.0002079	57	139	19	221
998	0.0002062	50	146	15	242
999	0.0001906	133	160	18	187
mean	0.000190352	70.967	140.533	16.139	210.099

## Sheet: GS_Opt
	time	SEq	Bal	Reg	Egal
0	0.0005272	49	133	16	207
1	0.0003618	75	143	16	211
2	0.0003453	40	135	15	207
3	0.000336	95	138	14	177
4	0.0003539	89	153	13	210
5	0.0003227	61	136	17	195
6	0.000353	56	126	16	187
7	0.0003268	104	146	15	172
8	0.0004254	47	131	18	209
9	0.0003638	85	139	12	180
10	0.0003504	76	148	17	200
11	0.0003331	73	137	15	188
12	0.0003828	24	136	14	225
13	0.0003619	53	134	18	213
14	0.0003405	57	139	16	196
15	0.000344	50	132	16	194
16	0.0003595	59	142	17	203
17	0.0003579	108	153	14	192
18	0.0003399	28	134	18	206
19	0.0003316	86	144	14	193
20	0.0003677	55	134	17	208
21	0.0003602	68	136	14	184
22	0.000351	59	138	12	211
23	0.0003902	68	145	15	220
24	0.0003378	102	148	14	194
25	0.0003443	65	136	13	197
26	0.0003484	54	140	16	197
27	0.0003381	76	137	16	198
28	0.0003458	90	147	17	201
29	0.0004002	120	159	14	198
30	0.000333	66	146	14	206
31	0.0003861	23	125	15	198
32	0.000408	108	161	18	214
33	0.0003519	82	144	15	200
34	0.0003474	65	138	17	211
35	0.0004225	98	153	16	208
36	0.0003537	61	143	15	217
37	0.0003264	67	137	11	194
38	0.000343	91	157	19	208
39	0.0003508	8	136	16	220
40	0.0003377	52	138	16	208
41	0.0003464	52	125	14	182
42	0.0003342	37	130	15	198
43	0.0003522	53	143	17	214
44	0.0004104	23	127	17	189
45	0.00033	80	141	14	189
46	0.0003349	99	139	14	179
47	0.0003325	68	143	14	208
48	0.0003515	72	138	14	189
49	0.0003398	62	135	14	196
50	0.0003464	67	140	15	207
51	0.0003385	69	132	14	195
52	0.0003243	77	137	19	192
53	0.0003472	51	140	14	212
54	0.0003375	76	144	14	202
55	0.0003388	108	156	16	198
56	0.0003426	40	129	17	198
57	0.0003447	103	148	14	193
58	0.0003519	34	135	15	216
59	0.0003473	76	145	14	209
60	0.0003669	79	144	17	209
61	0.0003458	107	149	13	188
62	0.0003432	92	151	17	210
63	0.0003513	58	131	15	181
64	0.0003557	37	133	18	201
65	0.0003386	99	152	16	205
66	0.0004197	51	126	16	188
67	0.0003794	90	143	13	196
68	0.0003347	65	147	18	218
69	0.0003746	119	159	18	199
70	0.0003423	94	139	16	182
71	0.0003282	122	151	16	178
72	0.000355	38	136	16	206
73	0.0003801	92	142	16	192
74	0.0003312	25	123	17	191
75	0.0003317	95	130	14	165
76	0.0003404	106	143	14	180
77	0.0003776	69	148	16	215
78	0.0003329	93	143	15	193
79	0.0003371	69	137	16	202
80	0.0003597	69	154	18	204
81	0.0003475	69	141	17	210
82	0.0003392	79	141	17	203
83	0.0003459	32	128	15	183
84	0.0003954	59	141	15	207
85	0.0003568	64	132	15	188
86	0.0003842	92	152	14	212
87	0.0005554	118	153	16	188
88	0.0003294	84	148	15	192
89	0.0003379	25	140	17	195
90	0.0003559	95	149	14	199
91	0.0003506	97	149	18	199
92	0.000339	80	134	17	176
93	0.0003267	20	133	17	200
94	0.0003383	74	144	15	212
95	0.00037	100	154	14	208
96	0.0003336	62	141	15	209
97	0.0003431	66	143	16	199
98	0.0003281	104	150	17	196
99	0.0003361	45	134	13	185
100	0.0003293	59	136	18	198
101	0.0003632	88	145	14	185
102	0.0003267	41	126	17	207
103	0.0003425	55	135	14	191
104	0.0003736	84	151	19	218
105	0.0003668	81	167	16	241
106	0.0003483	83	135	14	187
107	0.0003393	46	121	15	176
108	0.0003452	83	145	16	197
109	0.0003599	54	137	14	210
110	0.000336	69	133	16	180
111	0.0003398	77	135	13	183
112	0.0003569	52	140	13	209
113	0.000342	41	130	14	196
114	0.0003349	95	135	15	173
115	0.0003454	38	129	15	193
116	0.0003202	49	121	15	174
117	0.0003868	39	125	11	207
118	0.0003441	61	131	14	195
119	0.0003452	45	141	17	208
120	0.0004316	58	134	14	203
121	0.0003418	69	141	16	213
122	0.0003469	95	155	17	206
123	0.0003689	62	137	15	188
124	0.0003377	60	121	12	182
125	0.0003592	39	135	19	204
126	0.0003382	60	140	15	210
127	0.0003862	43	138	17	209
128	0.0003237	37	129	18	188
129	0.000344	114	158	17	195
130	0.0003746	87	142	17	190
131	0.000328	75	144	16	189
132	0.0003321	75	143	17	200
133	0.0003268	41	124	15	189
134	0.000325	54	131	14	202
135	0.0003678	87	148	13	195
136	0.0003489	53	143	16	211
137	0.0003462	96	146	18	194
138	0.0003396	122	161	13	188
139	0.0003548	93	139	18	185
140	0.0003541	117	162	14	207
141	0.0003387	67	136	17	197
142	0.000358	112	162	17	212
143	0.0003294	11	134	15	205
144	0.0003449	97	140	16	183
145	0.0003468	53	140	16	216
146	0.0003404	75	141	17	189
147	0.0003384	77	135	17	189
148	0.0003513	83	147	17	200
149	0.0003984	42	138	16	221
150	0.0003617	111	158	13	205
151	0.0003375	90	150	18	210
152	0.0003556	123	165	14	207
153	0.0003536	86	147	17	208
154	0.0004095	85	155	17	225
155	0.0004022	49	123	13	180
156	0.000354	50	115	15	174
157	0.000369	129	164	18	199
158	0.0003575	95	144	18	193
159	0.0003547	129	176	19	223
160	0.0003252	47	134	18	191
161	0.0003724	62	147	17	232
162	0.0003347	69	134	15	199
163	0.0003372	92	151	17	210
164	0.0003442	42	128	15	191
165	0.0003577	105	157	17	205
166	0.0003639	66	127	15	188
167	0.0003384	42	136	18	212
168	0.0003571	78	145	15	204
169	0.0003498	116	164	19	207
170	0.0003329	67	143	16	206
171	0.0003387	119	160	19	198
172	0.0003424	82	135	19	187
173	0.0003693	47	127	17	207
174	0.0003291	38	124	16	203
175	0.000349	54	139	15	208
176	0.0003658	54	138	19	222
177	0.0003287	71	134	16	197
178	0.0003327	73	132	15	173
179	0.0003432	98	147	16	196
180	0.0003509	80	145	18	200
181	0.0003638	99	148	15	197
182	0.000338	41	146	17	225
183	0.0003326	102	147	15	192
184	0.0003657	108	151	16	183
185	0.0003553	119	157	19	195
186	0.000365	47	141	17	228
187	0.0003555	86	139	12	186
188	0.0003677	65	144	13	213
189	0.0003516	88	144	18	197
190	0.0003366	98	148	13	190
191	0.0003268	54	136	15	194
192	0.0003778	93	149	16	201
193	0.0003656	43	138	17	211
194	0.0003716	80	137	16	194
195	0.0003654	61	133	16	190
196	0.0003538	70	141	14	210
197	0.0003337	69	137	16	193
198	0.000347	65	149	18	231
199	0.000339	76	131	15	186
200	0.000349	74	142	15	210
201	0.0003291	53	127	16	194
202	0.0003417	87	143	17	199
203	0.0003452	81	154	18	198
204	0.0003527	55	131	16	190
205	0.00034	38	129	14	183
206	0.0003561	48	133	18	215
207	0.0003802	74	144	16	203
208	0.0003548	49	133	14	217
209	0.0003325	29	133	16	192
210	0.0003672	57	119	16	181
211	0.0003264	72	151	19	213
212	0.0003776	55	140	15	215
213	0.0003315	88	144	15	188
214	0.0003385	67	140	17	197
215	0.0003928	105	149	14	193
216	0.0003439	47	128	18	194
217	0.0003202	52	128	12	174
218	0.0003383	47	132	14	179
219	0.0004907	72	133	16	194
220	0.0003761	113	154	16	183
221	0.000359	91	143	15	195
222	0.0003455	33	133	16	205
223	0.000335	81	140	16	199
224	0.0003546	112	146	12	180
225	0.0003441	64	132	15	200
226	0.0003577	113	145	14	177
227	0.0003353	80	148	14	216
228	0.0003633	115	147	14	179
229	0.0003594	105	152	17	199
230	0.0003339	77	139	16	194
231	0.0003313	36	122	16	192
232	0.0003292	71	140	14	194
233	0.0003476	62	151	17	220
234	0.0003485	84	133	11	177
235	0.0003396	102	154	18	206
236	0.0003477	96	155	13	214
237	0.0003364	68	143	16	206
238	0.0003476	67	133	17	194
239	0.0003312	78	149	13	215
240	0.0003366	70	147	15	206
241	0.0003436	87	149	17	209
242	0.0003523	78	155	15	200
243	0.0003444	100	153	14	204
244	0.0003414	86	144	16	197
245	0.0003436	52	140	16	184
246	0.0003694	85	142	14	179
247	0.0003631	97	155	16	202
248	0.0003236	38	124	16	204
249	0.0003408	34	129	14	192
250	0.0003974	77	133	16	189
251	0.0003538	49	132	19	202
252	0.0003411	54	136	12	207
253	0.0003416	56	140	16	204
254	0.0003285	102	142	14	181
255	0.000349	59	139	18	189
256	0.0003592	69	142	15	189
257	0.0003398	76	147	15	194
258	0.0003848	92	140	19	180
259	0.0003488	83	144	15	184
260	0.0003507	81	143	16	205
261	0.0003852	77	141	13	181
262	0.0003412	26	135	16	211
263	0.0003859	74	140	16	198
264	0.000339	9	129	16	193
265	0.0003282	74	139	17	183
266	0.0003215	50	127	17	173
267	0.0003578	43	124	15	205
268	0.0003683	63	137	14	179
269	0.0003384	50	131	15	212
270	0.0003525	127	154	16	181
271	0.0003342	70	130	17	184
272	0.0003477	17	134	17	211
273	0.0003256	69	134	16	180
274	0.0003323	56	141	16	200
275	0.0003394	78	135	15	192
276	0.0003519	100	154	16	197
277	0.0003305	44	143	16	200
278	0.0003359	48	139	16	210
279	0.0003619	103	151	19	199
280	0.000354	47	141	19	216
281	0.0003246	73	141	15	186
282	0.0003421	51	140	15	197
283	0.0004495	21	127	18	209
284	0.000348	97	145	17	192
285	0.0003352	47	122	12	176
286	0.0003438	112	161	18	203
287	0.0003695	71	145	16	214
288	0.0003316	54	137	18	214
289	0.000362	52	135	16	198
290	0.0003758	52	141	17	193
291	0.0003522	81	143	14	193
292	0.0003317	73	142	18	193
293	0.0003639	70	151	19	221
294	0.0003402	38	134	15	198
295	0.0003773	51	141	16	203
296	0.0003317	96	134	13	167
297	0.0003319	89	134	13	171
298	0.000353	79	135	13	187
299	0.0004097	87	166	16	232
300	0.0003747	64	133	12	201
301	0.0003386	55	135	16	197
302	0.0003596	59	139	13	195
303	0.0003589	61	134	14	207
304	0.0003514	95	139	12	183
305	0.0003434	82	152	17	222
306	0.0003531	105	144	16	177
307	0.0003425	75	142	16	209
308	0.0004336	103	155	13	206
309	0.0003347	87	141	15	190
310	0.0004125	79	160	18	211
311	0.0003783	21	136	16	210
312	0.00034	76	133	14	188
313	0.0003601	83	149	14	207
314	0.0003341	106	146	18	186
315	0.0003363	85	141	19	197
316	0.0003236	69	128	14	178
317	0.0003407	40	124	17	203
318	0.0003666	106	153	13	200
319	0.0003788	61	141	16	197
320	0.0003514	117	154	13	191
321	0.0003333	96	152	15	194
322	0.0003612	19	123	15	217
323	0.0003264	82	151	14	203
324	0.0003706	51	126	16	199
325	0.0003729	20	127	18	211
326	0.0003621	50	135	17	213
327	0.0003466	58	147	14	206
328	0.0003638	43	123	15	191
329	0.0003398	113	162	18	211
330	0.0003253	53	129	15	181
331	0.000347	114	157	17	200
332	0.0003629	60	137	16	189
333	0.0003371	98	142	13	186
334	0.0003548	121	162	17	203
335	0.0003607	79	146	15	188
336	0.0003347	56	138	15	202
337	0.0003392	98	152	15	206
338	0.0003401	88	146	13	198
339	0.000367	74	141	19	208
340	0.0003583	86	142	13	198
341	0.0003381	116	146	17	176
342	0.0003277	61	136	13	193
343	0.0003333	59	125	18	187
344	0.0003498	41	132	18	191
345	0.0003433	58	137	15	193
346	0.0003272	71	139	16	193
347	0.0003622	22	142	18	231
348	0.0003378	82	136	11	184
349	0.0003502	121	158	14	187
350	0.0003358	70	146	17	201
351	0.0003523	97	148	12	192
352	0.0003656	60	141	13	185
353	0.0003338	10	139	18	211
354	0.0003302	69	136	17	199
355	0.0003351	65	139	17	199
356	0.0003423	86	138	18	190
357	0.0003364	107	151	16	195
358	0.0003544	87	141	15	190
359	0.000347	39	122	15	188
360	0.0003416	30	129	16	190
361	0.0003509	82	146	13	190
362	0.0003342	160	176	19	192
363	0.00039	55	143	17	210
364	0.0003449	71	143	17	215
365	0.0003597	89	148	15	198
366	0.000355	39	130	16	206
367	0.0003959	56	130	17	187
368	0.0003634	71	146	16	221
369	0.0003263	41	129	15	172
370	0.000371	106	147	15	179
371	0.000359	87	153	14	215
372	0.0003526	78	140	16	202
373	0.0003531	68	148	18	218
374	0.0003429	83	144	15	205
375	0.0003489	70	141	17	197
376	0.0003271	44	135	18	205
377	0.0003621	79	148	16	217
378	0.000326	78	141	17	195
379	0.0003946	93	149	14	198
380	0.0003449	56	134	14	185
381	0.0003429	51	133	16	209
382	0.0003328	107	144	18	181
383	0.0003494	73	139	14	189
384	0.000334	62	140	17	202
385	0.0003755	63	140	15	204
386	0.0003622	112	157	19	202
387	0.0003682	60	128	15	194
388	0.0003526	49	130	14	194
389	0.0003444	57	141	18	216
390	0.0003583	51	129	16	182
391	0.0003954	74	137	12	200
392	0.0003331	76	140	17	185
393	0.000341	43	118	16	174
394	0.0003319	77	146	13	197
395	0.0003415	43	135	18	212
396	0.0003411	103	157	16	211
397	0.0003511	71	148	17	209
398	0.0003735	102	152	18	189
399	0.0003532	107	151	18	195
400	0.0003566	59	137	17	215
401	0.0003404	85	153	15	206
402	0.0003412	56	129	17	202
403	0.0003686	26	139	15	227
404	0.0003607	46	141	17	209
405	0.000353	45	137	15	202
406	0.0003315	47	131	13	203
407	0.000339	86	156	17	218
408	0.0003295	89	151	14	204
409	0.0003576	81	141	13	195
410	0.0003499	64	148	13	226
411	0.0003442	48	134	17	193
412	0.00037	82	147	18	208
413	0.0003542	80	139	16	198
414	0.000329	69	132	17	195
415	0.0003634	134	163	17	192
416	0.0003318	74	140	17	199
417	0.0003249	11	119	19	186
418	0.0003375	31	133	15	204
419	0.0003469	98	149	14	200
420	0.0003385	101	146	15	188
421	0.0003428	83	151	17	208
422	0.0003309	34	125	18	185
423	0.0003359	39	128	16	194
424	0.0003392	79	138	16	182
425	0.0003688	97	141	14	185
426	0.0003325	78	139	14	199
427	0.0003303	63	130	14	197
428	0.0003514	55	151	17	213
429	0.0003479	122	153	17	184
430	0.0003678	67	148	17	203
431	0.0003598	83	154	18	203
432	0.000361	85	143	16	201
433	0.0003289	36	112	17	173
434	0.0003285	113	161	15	196
435	0.0003332	68	129	15	176
436	0.0003509	45	130	15	211
437	0.0003377	124	164	16	200
438	0.0003317	70	138	15	206
439	0.0003384	49	128	16	179
440	0.0003551	74	147	15	210
441	0.0003324	9	117	16	181
442	0.0003492	81	131	16	181
443	0.0003334	50	135	16	196
444	0.0004055	79	139	15	199
445	0.0003586	69	137	17	205
446	0.0003449	23	126	18	200
447	0.0003366	53	138	16	216
448	0.0003888	30	135	19	211
449	0.0003463	66	132	15	178
450	0.0003366	52	130	15	198
451	0.0003656	79	142	13	193
452	0.0003684	75	141	14	193
453	0.000367	90	152	14	208
454	0.0003274	73	134	14	195
455	0.0003388	51	138	17	206
456	0.0003381	81	141	15	198
457	0.0003457	51	130	18	209
458	0.0003409	58	139	17	182
459	0.00036	83	142	14	201
460	0.0003538	28	136	18	215
461	0.0003308	73	132	19	173
462	0.0003786	77	144	17	190
463	0.0003793	97	146	19	195
464	0.000398	86	153	17	212
465	0.0003327	100	150	15	189
466	0.0003325	47	137	17	203
467	0.0003391	81	141	16	196
468	0.000352	56	141	17	196
469	0.0003725	60	141	17	206
470	0.0003469	101	147	17	193
471	0.0003415	80	148	17	216
472	0.0003368	104	150	15	190
473	0.0003649	98	143	16	188
474	0.000387	93	153	16	205
475	0.0003458	114	150	19	172
476	0.0003743	24	131	16	222
477	0.0003284	90	139	14	184
478	0.0003934	95	149	17	203
479	0.0003571	98	149	16	200
480	0.0003354	59	135	13	205
481	0.0003334	74	149	17	220
482	0.0003455	111	161	15	209
483	0.0003319	22	124	18	189
484	0.0003419	37	139	15	200
485	0.0003528	82	134	15	179
486	0.0003492	59	131	13	203
487	0.0003281	75	139	15	175
488	0.0003431	35	133	19	219
489	0.0003439	84	144	18	204
490	0.0003777	72	144	15	192
491	0.0003341	86	139	15	192
492	0.0003516	20	131	14	201
493	0.0003593	95	141	16	187
494	0.0003356	87	151	19	200
495	0.0003661	80	148	16	203
496	0.000339	53	134	16	186
497	0.0003285	20	138	17	190
498	0.0003839	118	155	19	192
499	0.0003558	51	137	15	193
500	0.000341	26	125	18	209
501	0.0003464	54	134	16	210
502	0.0003376	66	138	17	201
503	0.0003583	67	142	15	201
504	0.0003411	92	135	12	172
505	0.0003429	75	145	19	215
506	0.0003812	95	155	16	206
507	0.0003785	41	135	18	228
508	0.0003723	64	139	15	206
509	0.000366	36	124	14	197
510	0.0003465	115	143	17	171
511	0.0003452	77	149	15	218
512	0.0003325	29	116	12	167
513	0.0003358	97	144	14	191
514	0.0003479	90	146	14	195
515	0.0003569	122	152	15	182
516	0.0003392	26	131	16	207
517	0.0003354	13	132	19	188
518	0.0003347	20	137	16	215
519	0.0003524	71	153	16	223
520	0.0003598	54	145	14	224
521	0.0003424	104	153	19	202
522	0.0003457	87	141	15	195
523	0.000341	97	140	18	178
524	0.0003861	47	131	15	197
525	0.0003558	33	124	15	197
526	0.0003485	62	144	18	208
527	0.0003702	117	155	16	193
528	0.0003773	35	127	16	199
529	0.000333	92	154	18	199
530	0.0003278	77	142	14	198
531	0.0003336	77	148	13	216
532	0.0004267	52	141	16	202
533	0.0003658	71	142	15	203
534	0.0003355	85	143	14	192
535	0.0003425	82	139	12	196
536	0.0003456	93	151	18	207
537	0.00037	50	133	17	199
538	0.0003274	25	124	17	202
539	0.0003744	56	132	15	196
540	0.0003395	66	137	16	199
541	0.0003755	87	148	15	193
542	0.000352	86	144	15	202
543	0.0003344	62	132	12	185
544	0.0003377	76	134	19	192
545	0.0003472	114	157	15	200
546	0.00033	60	134	15	192
547	0.0003334	63	124	15	170
548	0.0003423	49	139	16	222
549	0.0003374	74	128	16	182
550	0.0003556	91	142	14	193
551	0.0003429	52	136	15	202
552	0.000349	43	123	16	188
553	0.0003366	52	137	16	194
554	0.0003445	104	150	17	196
555	0.0003702	50	142	15	219
556	0.0003406	104	155	14	205
557	0.0003774	82	147	17	206
558	0.000368	116	150	16	184
559	0.0003429	61	138	14	211
560	0.0003738	56	131	13	200
561	0.0003561	78	146	19	196
562	0.0003574	58	132	15	206
563	0.0003796	91	151	15	206
564	0.0003453	81	142	17	203
565	0.0003395	76	150	17	209
566	0.0003574	39	141	15	222
567	0.0003325	90	143	15	185
568	0.0003339	33	137	15	219
569	0.0005544	65	121	12	177
570	0.0003607	91	148	18	191
571	0.0003457	74	153	17	201
572	0.0003623	95	152	14	201
573	0.0003505	42	123	15	191
574	0.0003407	57	125	13	188
575	0.0003453	75	140	17	205
576	0.0003273	92	148	14	204
577	0.0003658	86	150	13	214
578	0.0003578	82	149	17	197
579	0.0003571	20	140	18	220
580	0.000329	102	150	16	194
581	0.0003321	40	128	17	189
582	0.0003395	85	153	14	203
583	0.00035	46	121	16	181
584	0.0003251	45	134	17	188
585	0.0003506	62	135	18	208
586	0.0003453	79	136	15	193
587	0.0003525	41	125	16	205
588	0.0003456	65	145	16	225
589	0.0003732	50	145	17	202
590	0.0003479	114	161	17	200
591	0.0003408	89	150	14	210
592	0.0003398	74	127	14	169
593	0.0003566	65	134	18	199
594	0.0003443	52	127	13	187
595	0.0003217	29	116	18	184
596	0.0003343	85	146	13	188
597	0.0003719	84	150	17	190
598	0.0003415	80	134	12	188
599	0.000343	90	154	17	209
600	0.0003609	77	142	15	188
601	0.0003328	70	139	15	181
602	0.0003791	82	139	12	196
603	0.0003349	110	155	19	198
604	0.0003497	64	142	18	214
605	0.0003477	78	144	18	207
606	0.0003387	100	140	18	179
607	0.0003379	44	135	18	212
608	0.0003447	39	129	18	211
609	0.0003426	53	137	19	221
610	0.0003733	87	140	15	193
611	0.0003487	104	147	16	190
612	0.00039	52	148	16	214
613	0.0003539	72	143	13	200
614	0.0004346	92	137	15	182
615	0.0003697	25	139	15	198
616	0.0003613	72	137	13	202
617	0.0003517	111	157	17	203
618	0.0003533	69	139	14	195
619	0.0003506	52	133	17	205
620	0.0003642	80	138	15	196
621	0.0003425	99	155	18	206
622	0.0003402	54	135	16	195
623	0.0003766	81	138	13	195
624	0.0003358	77	138	15	186
625	0.0003447	111	154	17	193
626	0.00036	76	142	15	186
627	0.0003764	65	146	19	211
628	0.0003569	69	139	16	209
629	0.0003383	39	140	16	204
630	0.0003566	131	152	14	173
631	0.0003788	97	144	17	191
632	0.0003582	71	139	18	204
633	0.0003437	54	135	16	204
634	0.0003357	87	147	15	207
635	0.0003592	110	144	13	178
636	0.0003322	62	138	16	213
637	0.0004035	36	138	14	200
638	0.0003619	65	134	14	200
639	0.0003297	66	140	15	203
640	0.0003486	55	136	15	198
641	0.0003361	24	131	19	199
642	0.0003425	109	157	13	201
643	0.0003445	89	137	16	184
644	0.000341	57	125	15	185
645	0.0003593	85	152	12	219
646	0.0003896	102	146	16	190
647	0.0003347	67	141	13	213
648	0.0003595	52	131	16	201
649	0.0003269	66	132	19	185
650	0.0003484	20	118	19	195
651	0.000358	72	142	16	212
652	0.0003358	110	143	17	176
653	0.0003308	84	142	13	196
654	0.0003926	78	135	13	191
655	0.0003438	80	151	15	204
656	0.0003336	35	121	18	187
657	0.0003276	72	118	16	164
658	0.0003622	91	140	13	189
659	0.000352	99	156	16	208
660	0.000377	109	152	19	194
661	0.0003716	50	135	15	208
662	0.0003348	81	135	14	189
663	0.000338	19	133	15	223
664	0.0003414	131	164	18	197
665	0.0003392	59	129	13	199
666	0.000347	105	158	16	208
667	0.0003485	84	145	18	187
668	0.0003249	63	146	17	211
669	0.0003486	107	155	18	203
670	0.0003369	64	139	14	178
671	0.0003367	51	147	17	222
672	0.0003333	75	138	19	199
673	0.0003347	101	143	17	185
674	0.0003388	97	141	13	185
675	0.0003306	26	122	14	177
676	0.0003346	94	144	15	194
677	0.0003445	58	128	15	192
678	0.0003243	39	125	16	190
679	0.0003281	107	152	15	181
680	0.0003552	81	143	14	205
681	0.0003537	73	149	17	200
682	0.000333	67	135	16	178
683	0.0003637	78	155	15	223
684	0.0003894	53	136	15	209
685	0.0003718	39	128	18	216
686	0.0003272	51	124	13	191
687	0.000338	92	163	16	223
688	0.0003546	57	125	14	190
689	0.0003786	20	138	19	205
690	0.0003529	44	124	15	203
691	0.0003537	61	144	13	227
692	0.0003583	32	127	17	219
693	0.0003581	63	142	16	221
694	0.0003287	67	140	14	205
695	0.0003359	74	141	15	208
696	0.0003374	101	143	14	185
697	0.0003346	43	130	13	217
698	0.0003561	8	121	17	200
699	0.0003478	87	136	14	185
700	0.0003484	83	136	15	169
701	0.0003334	98	159	17	205
702	0.0003312	28	117	15	195
703	0.0003416	91	149	17	206
704	0.0003368	105	144	14	183
705	0.0003489	73	145	17	209
706	0.0003436	79	147	14	209
707	0.0003441	101	157	15	198
708	0.0003957	84	141	17	195
709	0.0003487	32	130	14	209
710	0.0003358	80	134	16	175
711	0.0003472	104	150	18	196
712	0.0003388	64	150	14	227
713	0.0003347	93	142	17	185
714	0.0003387	80	138	12	182
715	0.0003325	36	124	15	200
716	0.0003458	74	144	16	205
717	0.000329	67	122	14	160
718	0.0003428	55	134	19	211
719	0.0003492	106	145	19	184
720	0.0003522	89	144	13	195
721	0.0003587	89	156	15	223
722	0.0003441	86	132	14	178
723	0.0003782	74	147	16	217
724	0.0003548	98	142	16	186
725	0.0003455	100	144	14	180
726	0.0003362	83	141	13	199
727	0.0003867	77	144	13	207
728	0.0003551	86	149	16	201
729	0.0003297	56	126	14	196
730	0.000337	85	151	16	206
731	0.0003691	76	147	14	205
732	0.0003346	65	145	16	202
733	0.0003412	89	135	11	180
734	0.000335	106	155	18	186
735	0.0003395	118	154	18	190
736	0.0003429	75	150	18	225
737	0.0003477	73	139	16	195
738	0.0003445	68	133	11	196
739	0.0003695	100	155	16	207
740	0.0003532	90	137	14	184
741	0.0003373	51	125	12	193
742	0.0003322	85	145	14	205
743	0.000335	69	141	18	199
744	0.0003342	79	133	13	186
745	0.0003481	55	130	16	190
746	0.0003565	69	134	17	178
747	0.0003399	102	151	12	200
748	0.000358	106	146	13	186
749	0.0003556	48	141	14	200
750	0.0003531	49	136	18	184
751	0.0003349	66	135	14	204
752	0.0003336	121	157	15	193
753	0.000343	37	128	15	198
754	0.0003834	91	157	16	210
755	0.0003495	103	152	15	190
756	0.0003421	102	147	14	186
757	0.0003265	67	124	16	173
758	0.0003302	82	135	14	188
759	0.0003425	33	125	16	203
760	0.0003488	102	143	16	176
761	0.0003325	25	123	18	205
762	0.00033	74	135	15	187
763	0.0003466	67	141	18	206
764	0.0003316	59	137	17	213
765	0.0003883	56	127	17	198
766	0.00035	109	144	14	179
767	0.0003379	64	136	17	200
768	0.0003358	113	152	14	187
769	0.0003295	24	126	15	200
770	0.0003241	62	133	16	181
771	0.0003627	67	143	15	190
772	0.0003355	66	129	13	179
773	0.0003823	83	142	15	201
774	0.0003557	31	139	17	218
775	0.0003659	111	153	15	195
776	0.0003458	32	125	18	188
777	0.0003711	78	146	14	214
778	0.0003312	119	153	17	187
779	0.000346	16	128	17	218
780	0.0003286	43	143	18	199
781	0.0003444	55	149	16	224
782	0.000349	102	149	14	191
783	0.0003708	39	131	18	197
784	0.0003358	69	141	18	203
785	0.0003276	89	134	14	172
786	0.0003341	24	131	16	197
787	0.0003445	101	165	15	218
788	0.0004207	62	134	16	206
789	0.000355	3	130	18	206
790	0.0003356	69	140	15	191
791	0.0003407	81	136	15	182
792	0.0003647	57	119	13	181
793	0.0003513	106	148	14	190
794	0.0003334	79	140	19	194
795	0.0003381	105	155	15	205
796	0.0003483	18	119	16	181
797	0.0003379	100	145	13	183
798	0.0003466	64	138	17	212
799	0.0003627	51	136	19	208
800	0.0003525	50	126	15	180
801	0.0003272	129	160	18	187
802	0.0003243	68	131	15	167
803	0.0005482	93	155	15	207
804	0.0003637	65	135	13	172
805	0.0003262	43	131	17	185
806	0.0003462	101	148	18	195
807	0.0003492	89	151	14	209
808	0.0003266	47	145	17	197
809	0.0003349	75	146	14	200
810	0.0003441	84	152	18	215
811	0.0003387	20	117	14	177
812	0.0003373	92	167	15	208
813	0.0003395	97	151	17	205
814	0.0003467	75	140	18	205
815	0.0003467	55	143	15	226
816	0.000325	41	130	16	183
817	0.0003381	83	148	16	206
818	0.0003693	59	144	17	229
819	0.000342	66	127	15	188
820	0.0003302	58	131	17	186
821	0.0003436	76	152	17	214
822	0.0003403	34	132	17	205
823	0.0003499	98	146	15	189
824	0.0003637	82	132	14	179
825	0.0003325	41	139	15	211
826	0.0003458	82	135	14	188
827	0.0003451	70	142	14	187
828	0.0003518	46	125	14	198
829	0.0003409	65	142	17	219
830	0.0003475	73	135	12	197
831	0.000338	64	137	16	183
832	0.0003394	57	145	13	212
833	0.0003341	58	134	15	188
834	0.0003772	81	154	18	217
835	0.0003965	73	144	14	212
836	0.0003549	71	142	14	208
837	0.0003598	49	129	17	193
838	0.0003265	75	128	14	180
839	0.0003287	42	126	16	182
840	0.000329	64	137	17	180
841	0.0003436	77	137	13	190
842	0.0003463	73	142	15	206
843	0.0003277	63	143	16	205
844	0.0003416	94	151	13	190
845	0.0003527	82	132	15	178
846	0.0004195	106	149	17	192
847	0.0003364	61	146	15	212
848	0.0003273	67	134	16	191
849	0.000352	91	137	13	176
850	0.0003723	59	139	16	210
851	0.0003593	55	136	18	207
852	0.0003391	87	142	17	197
853	0.0003456	91	158	17	216
854	0.0003447	119	159	16	199
855	0.0003498	94	149	17	193
856	0.0003383	42	127	12	198
857	0.0003292	76	147	16	218
858	0.0003484	59	140	17	198
859	0.0003514	46	135	18	217
860	0.000352	70	148	17	214
861	0.0003291	70	126	14	182
862	0.0003617	97	146	13	195
863	0.0003393	39	133	16	195
864	0.000336	74	137	16	179
865	0.0003586	31	131	18	206
866	0.0003787	39	130	17	195
867	0.0003482	17	124	16	195
868	0.0003528	80	139	16	198
869	0.0003387	128	159	14	190
870	0.0003414	117	153	16	189
871	0.0003365	88	149	16	207
872	0.0003241	7	118	19	200
873	0.00035	102	161	19	220
874	0.0003612	63	139	12	199
875	0.0003278	64	139	16	198
876	0.0003612	119	150	14	181
877	0.0003365	65	140	14	195
878	0.0003445	104	157	18	203
879	0.0003582	26	127	16	210
880	0.0003557	86	147	15	199
881	0.0003324	55	149	15	218
882	0.0003655	63	133	15	191
883	0.0003296	52	137	18	201
884	0.0003518	77	149	15	211
885	0.0003346	10	126	17	214
886	0.0003378	19	122	17	193
887	0.0003427	97	160	17	199
888	0.0003375	83	145	16	207
889	0.0004222	58	141	15	213
890	0.000353	68	147	15	205
891	0.0003569	100	146	14	192
892	0.0003702	72	145	13	209
893	0.0003919	18	141	19	224
894	0.000343	102	157	17	195
895	0.0003638	50	137	17	192
896	0.000338	100	153	16	204
897	0.0003591	64	134	14	200
898	0.0003582	110	151	13	192
899	0.0003342	118	153	15	188
900	0.0003386	40	129	14	197
901	0.0003682	30	122	15	183
902	0.0003375	42	133	18	198
903	0.0003353	2	127	14	220
904	0.000358	114	159	19	204
905	0.0003318	74	143	16	203
906	0.0003393	64	141	13	206
907	0.000349	42	133	17	220
908	0.0003367	50	134	13	191
909	0.0003354	38	133	18	196
910	0.0003373	81	130	16	169
911	0.000365	102	155	15	191
912	0.0003597	54	136	12	218
913	0.0003472	62	139	15	198
914	0.0003297	85	146	16	186
915	0.0003414	107	150	18	193
916	0.0003342	43	132	15	209
917	0.0003646	79	144	17	209
918	0.0003413	104	148	14	192
919	0.0003443	98	148	13	192
920	0.0003791	70	145	17	203
921	0.0003368	31	131	16	188
922	0.0003404	63	132	15	200
923	0.0003758	61	147	18	224
924	0.000377	60	135	14	196
925	0.0003418	101	164	16	216
926	0.0003573	50	125	13	190
927	0.0003765	43	130	18	211
928	0.0003352	61	137	17	201
929	0.0003436	82	148	16	206
930	0.0003457	134	168	19	202
931	0.0003306	3	126	16	197
932	0.0003344	82	138	16	189
933	0.0003469	59	131	11	187
934	0.0003701	95	146	16	197
935	0.0003873	79	146	16	195
936	0.0003314	53	141	17	212
937	0.0003472	66	128	14	190
938	0.0003254	60	135	13	196
939	0.0003636	86	144	17	199
940	0.0003423	76	149	14	203
941	0.000342	72	136	18	194
942	0.0003387	44	131	13	214
943	0.0003454	47	139	14	207
944	0.0003949	48	136	15	224
945	0.0003417	53	128	12	186
946	0.0003481	63	141	16	196
947	0.0003411	70	140	14	196
948	0.0003252	58	128	13	178
949	0.0003364	90	139	14	186
950	0.0003571	80	139	14	179
951	0.0003298	71	130	15	170
952	0.0003323	79	129	10	179
953	0.0003692	87	138	14	189
954	0.0003604	86	144	15	197
955	0.0003401	74	140	15	206
956	0.0003593	108	149	15	190
957	0.0003681	75	133	13	191
958	0.0003662	105	171	17	222
959	0.0003502	71	154	16	223
960	0.000344	126	164	16	202
961	0.0003664	43	141	19	226
962	0.0003464	44	141	18	197
963	0.0003238	10	113	15	180
964	0.0003441	61	146	15	213
965	0.00035	73	145	17	197
966	0.0003829	65	150	14	225
967	0.0003275	46	136	14	198
968	0.0003604	76	142	17	203
969	0.000335	76	140	15	191
970	0.0003461	69	151	18	221
971	0.0003427	76	138	17	188
972	0.0003637	64	132	15	187
973	0.0003544	90	148	17	196
974	0.000337	72	148	16	221
975	0.0003408	70	150	17	230
976	0.000354	19	122	17	198
977	0.0003746	44	130	17	206
978	0.000352	99	154	15	206
979	0.0003396	48	128	17	196
980	0.0003451	73	151	19	211
981	0.0003941	85	147	14	203
982	0.000351	106	157	17	202
983	0.0003968	73	145	13	208
984	0.0003355	58	136	13	196
985	0.0003901	74	136	18	198
986	0.0003815	73	148	14	201
987	0.0003332	52	126	16	200
988	0.0003704	89	154	18	206
989	0.0003431	61	131	16	201
990	0.0003605	52	142	19	232
991	0.0003404	81	136	13	181
992	0.0003444	91	148	12	202
993	0.0003429	86	145	16	204
994	0.0003378	46	129	13	185
995	0.0003366	120	153	16	186
996	0.0003415	25	131	18	192
997	0.00039	57	139	19	207
998	0.0003622	50	146	15	217
999	0.0003466	133	160	18	187
mean	0.00035072	70.967	140.533	15.663	198.288

## Sheet: PolyMin_SEq
	time	SEq	Bal	Reg	Egal
0	0.003311	49	133	16	217
1	0.003161	75	143	16	211
2	0.0029541	50	140	14	230
3	0.0029962	95	138	14	181
4	0.0029123	89	153	13	217
5	0.0029963	61	136	17	211
6	0.00294	71	133	15	195
7	0.0028686	104	146	15	188
8	0.0028116	61	135	18	209
9	0.0031779	85	139	12	193
10	0.0027641	110	155	17	200
11	0.0028154	73	137	15	201
12	0.0028941	70	149	14	228
13	0.0029457	94	146	15	198
14	0.0029135	104	151	16	198
15	0.0029302	81	138	11	195
16	0.0032762	106	155	17	204
17	0.002855	108	153	14	198
18	0.0028959	122	164	18	206
19	0.0027861	86	144	14	202
20	0.0030975	55	134	17	213
21	0.0031346	68	136	14	204
22	0.0029961	59	138	12	217
23	0.0031778	68	145	15	222
24	0.0029572	102	148	14	194
25	0.0029657	78	140	13	202
26	0.0028656	54	140	16	226
27	0.0026012	76	137	16	198
28	0.0029533	90	147	17	204
29	0.0030204	120	159	14	198
30	0.0027832	66	146	14	226
31	0.0031829	48	133	14	218
32	0.0027986	108	161	18	214
33	0.0029479	92	147	15	202
34	0.0030398	65	138	17	211
35	0.0028998	98	153	16	208
36	0.0031682	61	143	15	225
37	0.0028599	67	137	11	207
38	0.0029519	133	172	16	211
39	0.0032654	76	148	18	220
40	0.0029479	52	138	16	224
41	0.0033843	104	143	14	182
42	0.0030817	37	130	15	223
43	0.0031443	69	146	15	223
44	0.0030345	103	145	13	187
45	0.0030507	80	141	14	202
46	0.0028453	99	139	14	179
47	0.0030483	68	143	14	218
48	0.0028741	88	143	14	198
49	0.0032384	101	148	14	195
50	0.0028171	85	146	15	207
51	0.0037509	69	132	14	195
52	0.0031676	108	146	15	184
53	0.0030736	75	146	14	217
54	0.0029211	82	147	14	212
55	0.0029029	108	156	16	204
56	0.0030459	116	157	17	198
57	0.0026673	103	148	14	193
58	0.0029215	74	145	15	216
59	0.0028294	76	145	14	214
60	0.0027672	99	154	17	209
61	0.0029081	107	149	13	191
62	0.0026788	92	151	17	210
63	0.0029815	93	144	14	195
64	0.0028784	74	142	17	210
65	0.0028624	99	152	16	205
66	0.0031796	88	135	15	182
67	0.0032065	90	143	13	196
68	0.0030603	65	147	18	229
69	0.0025961	119	159	18	199
70	0.0027905	113	143	16	173
71	0.0028225	128	153	16	178
72	0.003037	74	143	14	212
73	0.0029168	92	142	16	192
74	0.0035106	53	129	13	205
75	0.0028995	95	130	14	165
76	0.0027811	106	143	14	180
77	0.0029955	99	157	16	215
78	0.0030042	105	148	15	191
79	0.0029198	84	142	16	200
80	0.0029644	69	154	18	239
81	0.0027437	69	141	17	213
82	0.0027005	79	141	17	203
83	0.0029537	107	148	13	189
84	0.0030586	59	141	15	223
85	0.002881	108	148	15	188
86	0.0030411	92	152	14	212
87	0.0025833	118	153	16	188
88	0.0030459	84	148	15	212
89	0.0029373	96	155	13	214
90	0.0027754	95	149	14	203
91	0.0029567	125	162	18	199
92	0.0029333	108	142	17	176
93	0.0032702	85	155	16	225
94	0.0030768	92	152	15	212
95	0.0026344	100	154	14	208
96	0.0029952	83	150	14	217
97	0.0030892	121	160	16	199
98	0.0029903	104	150	17	196
99	0.0028503	115	150	13	185
100	0.0031163	59	136	18	213
101	0.0030548	88	145	14	202
102	0.0029407	41	126	17	211
103	0.0028755	55	135	14	215
104	0.0026574	84	151	19	218
105	0.0030249	121	184	14	247
106	0.002598	83	135	14	187
107	0.0028786	46	121	15	196
108	0.0028974	125	157	14	189
109	0.0030188	54	137	14	220
110	0.0028614	114	147	16	180
111	0.003093	77	135	13	193
112	0.0031627	52	140	13	228
113	0.0029969	67	138	14	209
114	0.0028467	95	135	15	175
115	0.002939	38	129	15	220
116	0.0031709	79	128	12	177
117	0.0031566	39	125	11	211
118	0.0030028	61	131	14	201
119	0.0029411	79	148	16	217
120	0.0031262	58	134	14	210
121	0.0030282	88	152	15	216
122	0.0032761	95	155	17	215
123	0.0028342	62	137	15	212
124	0.0031858	60	121	12	182
125	0.003088	109	155	13	201
126	0.0030672	83	148	14	213
127	0.0028851	43	138	17	233
128	0.0029384	78	141	14	204
129	0.0030044	114	158	17	202
130	0.0027796	124	157	17	190
131	0.0029139	103	150	16	197
132	0.0033234	107	153	15	199
133	0.0028114	41	124	15	207
134	0.0030248	79	140	14	201
135	0.0030702	87	148	13	209
136	0.0030862	111	161	16	211
137	0.0029351	96	146	18	196
138	0.0029576	122	161	13	200
139	0.0028081	93	139	18	185
140	0.0027862	117	162	14	207
141	0.0029295	96	147	15	198
142	0.0029567	125	168	17	211
143	0.0030434	115	160	15	205
144	0.0026099	97	140	16	183
145	0.0029146	78	148	16	218
146	0.0030235	109	148	16	187
147	0.0028954	77	135	17	193
148	0.0028599	83	147	17	211
149	0.0031802	71	147	14	223
150	0.0028977	111	158	13	205
151	0.0029272	112	161	18	210
152	0.0028514	123	165	14	207
153	0.0026712	86	147	17	208
154	0.0030392	85	155	17	225
155	0.0032042	49	123	13	197
156	0.0030928	50	115	15	180
157	0.0028891	129	164	18	199
158	0.0029768	95	144	18	193
159	0.0026914	129	176	19	223
160	0.0030587	77	139	15	201
161	0.0026057	62	147	17	232
162	0.0028519	69	134	15	199
163	0.0029864	92	151	17	210
164	0.0031574	91	143	14	195
165	0.0029674	130	166	17	202
166	0.0029359	66	127	15	188
167	0.0032098	81	147	14	213
168	0.0030887	78	145	15	212
169	0.002912	116	164	19	212
170	0.0029834	76	147	13	218
171	0.0028568	140	169	19	198
172	0.0028395	93	140	19	187
173	0.0031242	73	140	17	207
174	0.0030643	49	128	15	207
175	0.0031373	70	145	13	220
176	0.003023	54	138	19	222
177	0.0030139	71	134	16	197
178	0.0029056	73	132	15	191
179	0.0029177	98	147	16	196
180	0.0031	80	145	18	210
181	0.0027572	117	157	15	197
182	0.0032403	85	161	15	237
183	0.0030424	102	147	15	192
184	0.0027212	108	151	16	194
185	0.0027135	119	157	19	195
186	0.0031603	84	156	18	228
187	0.0028351	86	139	12	192
188	0.0030029	65	144	13	223
189	0.0030361	88	144	18	200
190	0.0029852	98	148	13	198
191	0.0032584	83	144	15	205
192	0.0028295	93	149	16	205
193	0.0032863	119	169	15	219
194	0.0030724	92	142	16	192
195	0.0028666	102	145	16	188
196	0.0029812	91	150	14	209
197	0.0029899	69	137	16	205
198	0.0031306	65	149	18	233
199	0.0027939	87	135	12	183
200	0.0028028	74	142	15	210
201	0.0029186	76	135	16	194
202	0.002521	87	143	17	199
203	0.0028442	94	157	18	220
204	0.0031766	55	131	16	207
205	0.0029676	107	145	14	183
206	0.0028937	75	141	16	207
207	0.0029523	96	149	16	202
208	0.0026442	49	133	14	217
209	0.0030814	66	140	15	214
210	0.0028201	57	119	16	181
211	0.0031696	109	160	14	211
212	0.0031209	72	147	15	222
213	0.0030963	101	148	15	195
214	0.00317	125	156	16	187
215	0.0026642	105	149	14	193
216	0.0031156	97	148	15	199
217	0.0028598	128	151	12	174
218	0.0032489	82	140	12	198
219	0.0027307	72	133	16	194
220	0.0028288	113	154	16	195
221	0.002577	91	143	15	195
222	0.0031655	60	139	16	218
223	0.0029487	81	140	16	199
224	0.0030174	112	146	12	180
225	0.0025792	64	132	15	200
226	0.0028285	113	145	14	177
227	0.0031788	80	148	14	216
228	0.0029692	115	147	14	179
229	0.0029534	105	152	17	199
230	0.0027557	98	145	16	192
231	0.0029339	67	131	13	195
232	0.0029602	92	144	13	196
233	0.0031635	81	154	14	227
234	0.0029021	84	133	11	182
235	0.0027557	102	154	18	206
236	0.0028308	96	155	13	214
237	0.0028914	68	143	16	218
238	0.0030753	76	136	17	196
239	0.0030334	78	149	13	220
240	0.0029735	70	147	15	224
241	0.0031605	107	158	17	209
242	0.0030127	116	160	14	204
243	0.0028223	100	153	14	206
244	0.0026956	121	159	16	197
245	0.0030703	124	156	14	188
246	0.0027567	115	147	14	179
247	0.0029768	118	160	16	202
248	0.0031617	38	124	16	210
249	0.0029531	64	132	14	200
250	0.0027767	77	133	16	189
251	0.0029163	49	132	19	215
252	0.0030002	54	136	12	218
253	0.0028802	88	146	16	204
254	0.0028206	102	142	14	182
255	0.0029293	113	157	15	201
256	0.0030935	89	144	14	199
257	0.0030989	76	147	15	218
258	0.0028067	118	149	19	180
259	0.0027954	116	150	15	184
260	0.0029297	81	143	16	205
261	0.0029326	77	141	13	205
262	0.0029252	26	135	16	244
263	0.0032742	74	140	16	206
264	0.0028727	103	148	16	193
265	0.0029114	101	149	16	197
266	0.0028112	79	131	16	183
267	0.0030633	43	124	15	205
268	0.0028011	78	139	13	200
269	0.00311	50	131	15	212
270	0.0027229	127	154	16	181
271	0.0027861	70	130	17	190
272	0.0030525	106	155	16	204
273	0.0029819	114	145	16	176
274	0.002875	100	150	16	200
275	0.0033141	89	140	15	191
276	0.0030796	120	166	16	212
277	0.0030258	97	151	14	205
278	0.00283	130	170	16	210
279	0.0027595	103	151	19	199
280	0.0031301	47	141	19	235
281	0.0031767	73	141	15	209
282	0.0029297	51	140	15	229
283	0.0028881	33	129	16	225
284	0.0029529	106	149	17	192
285	0.0030225	47	122	12	197
286	0.0028797	147	175	18	203
287	0.0030786	71	145	16	219
288	0.0033223	74	147	16	220
289	0.0029393	90	146	14	202
290	0.0031891	141	167	17	193
291	0.0031044	109	155	13	201
292	0.0029961	121	154	16	187
293	0.0028308	70	151	19	232
294	0.0030063	38	134	15	230
295	0.0029689	51	141	16	231
296	0.0029018	96	134	13	172
297	0.0027798	89	134	13	179
298	0.0029593	89	138	13	187
299	0.0031789	110	175	15	240
300	0.003258	64	133	12	202
301	0.0029175	84	143	16	202
302	0.003	59	139	13	219
303	0.0028067	61	134	14	207
304	0.0028011	95	139	12	183
305	0.0028707	82	152	17	222
306	0.0028687	105	144	16	183
307	0.0032574	75	142	16	209
308	0.0029842	103	155	13	207
309	0.0031758	102	144	12	186
310	0.0034997	79	160	18	241
311	0.0030916	142	176	16	210
312	0.0028415	76	133	14	190
313	0.0030819	88	151	14	214
314	0.0027953	106	146	18	186
315	0.0026279	85	141	19	197
316	0.0030068	69	128	14	187
317	0.0029606	40	124	17	208
318	0.0031072	106	153	13	200
319	0.0031101	121	159	16	197
320	0.0027292	117	154	13	191
321	0.0029035	120	157	15	194
322	0.0029868	61	137	17	213
323	0.0032329	82	151	14	220
324	0.0030834	96	141	15	186
325	0.0032054	98	152	17	206
326	0.0031172	65	138	16	211
327	0.0029203	110	158	14	206
328	0.0030642	68	130	14	192
329	0.0028464	113	162	18	211
330	0.0030259	53	129	15	205
331	0.0028046	114	157	17	200
332	0.0030794	60	137	16	214
333	0.0026985	98	142	13	186
334	0.0029417	133	168	17	203
335	0.0031189	118	153	15	188
336	0.0029144	116	159	15	202
337	0.0032536	98	152	15	206
338	0.003019	88	146	13	204
339	0.0028063	74	141	19	208
340	0.0027672	86	142	13	198
341	0.0029952	116	146	17	176
342	0.0031085	69	138	12	207
343	0.0030256	77	137	16	197
344	0.0029412	79	138	14	197
345	0.0028749	98	149	15	200
346	0.0029279	71	139	16	207
347	0.0030481	81	159	15	237
348	0.0028322	96	140	11	184
349	0.0028769	121	158	14	195
350	0.0029145	98	156	17	214
351	0.0028939	112	150	12	188
352	0.0030203	139	162	13	185
353	0.0032101	83	151	16	219
354	0.0028439	69	136	17	203
355	0.0031304	127	163	17	199
356	0.0029475	86	138	18	190
357	0.0028102	117	156	16	195
358	0.0030144	104	147	15	190
359	0.0031045	67	132	14	197
360	0.0035802	122	156	16	190
361	0.0030583	82	146	13	210
362	0.0027146	160	176	19	192
363	0.0030602	104	160	17	216
364	0.0031386	71	143	17	215
365	0.0027753	89	148	15	207
366	0.0030228	68	141	16	214
367	0.0028976	91	139	17	187
368	0.0031741	93	153	14	213
369	0.0032774	114	143	15	172
370	0.0028982	106	147	15	188
371	0.0031763	87	153	14	219
372	0.0025813	78	140	16	202
373	0.0031086	122	170	18	218
374	0.0028003	92	147	15	202
375	0.002847	113	155	14	197
376	0.0030804	74	146	16	218
377	0.0030106	79	148	16	217
378	0.0029509	129	161	17	193
379	0.0027926	93	149	14	205
380	0.002896	99	142	14	185
381	0.0030921	70	142	14	214
382	0.0029483	107	144	18	181
383	0.002819	101	147	14	193
384	0.0031298	81	145	13	209
385	0.0030628	76	144	14	212
386	0.0026729	112	157	19	202
387	0.0029219	78	136	15	194
388	0.0028822	69	133	13	197
389	0.0027952	72	144	18	216
390	0.0030968	98	140	16	182
391	0.0030349	74	137	12	200
392	0.0031655	93	143	15	193
393	0.0029274	104	139	16	174
394	0.0029846	77	146	13	215
395	0.003037	111	158	15	205
396	0.0028832	103	157	16	211
397	0.0030121	99	152	13	205
398	0.0030098	133	161	18	189
399	0.003039	107	151	18	195
400	0.0029409	59	137	17	215
401	0.0030305	85	153	15	221
402	0.0026217	56	129	17	202
403	0.0030587	79	151	15	223
404	0.003018	93	153	13	213
405	0.0028399	45	137	15	229
406	0.0031445	47	131	13	215
407	0.0031943	150	184	16	218
408	0.0029229	89	151	14	213
409	0.0032622	81	141	13	201
410	0.0033773	64	148	13	232
411	0.0029959	65	139	16	213
412	0.0030374	113	159	17	205
413	0.0026335	80	139	16	198
414	0.0031484	69	132	17	195
415	0.0026624	134	163	17	192
416	0.0030097	129	164	17	199
417	0.0030367	68	134	14	200
418	0.0030149	68	143	13	218
419	0.0027823	98	149	14	200
420	0.0030694	101	146	15	191
421	0.0029848	105	158	15	211
422	0.0029861	69	137	18	205
423	0.00301	39	128	16	217
424	0.0028466	79	138	16	197
425	0.0033393	97	141	14	185
426	0.002972	102	148	14	194
427	0.0031028	63	130	14	197
428	0.0030627	74	158	16	242
429	0.0037413	122	153	17	184
430	0.0030514	81	152	17	223
431	0.0030597	121	163	16	205
432	0.0031003	102	149	16	196
433	0.0028761	36	112	17	188
434	0.0028909	124	166	15	208
435	0.0029767	89	134	13	179
436	0.0029087	69	140	15	211
437	0.002932	124	164	16	204
438	0.00325	90	144	13	198
439	0.0029175	49	128	16	207
440	0.0029902	74	147	15	220
441	0.0030438	73	134	13	195
442	0.0027543	81	131	16	181
443	0.0030748	80	140	11	200
444	0.0026701	79	139	15	199
445	0.0027105	69	137	17	205
446	0.00303	65	135	13	205
447	0.0028984	110	163	16	216
448	0.0033062	96	161	18	226
449	0.0029335	118	148	15	178
450	0.0029954	62	134	14	206
451	0.003081	79	142	13	205
452	0.0029033	97	145	14	193
453	0.002849	112	160	14	208
454	0.0028269	85	136	14	187
455	0.0031514	72	143	14	214
456	0.0030804	96	147	15	198
457	0.0029726	51	130	18	209
458	0.0030999	140	161	17	182
459	0.002953	83	142	14	201
460	0.0031562	42	138	14	234
461	0.0029037	101	144	18	187
462	0.0030029	77	144	17	211
463	0.002827	97	146	19	195
464	0.0029712	118	165	17	212
465	0.003062	123	156	15	189
466	0.0030013	90	154	13	218
467	0.0030524	81	141	16	201
468	0.0029927	112	156	14	200
469	0.0031013	101	156	17	211
470	0.0029833	101	147	17	193
471	0.0032557	80	148	17	216
472	0.002743	120	155	15	190
473	0.0029736	98	143	16	188
474	0.0027306	116	160	16	204
475	0.0030033	132	152	19	172
476	0.0032034	50	136	16	222
477	0.0028768	110	147	14	184
478	0.002988	95	149	17	203
479	0.0027952	98	149	16	200
480	0.0031002	59	135	13	211
481	0.0031708	86	156	17	226
482	0.0027849	111	161	15	211
483	0.003075	52	130	16	208
484	0.0030893	37	139	15	241
485	0.002942	82	134	15	186
486	0.0028899	59	131	13	203
487	0.0029646	96	145	13	194
488	0.0031164	57	144	16	231
489	0.0025955	84	144	18	204
490	0.0035418	72	144	15	216
491	0.0029741	86	139	15	192
492	0.003032	64	137	13	210
493	0.0026849	95	141	16	187
494	0.0028914	106	153	19	200
495	0.0027227	80	148	16	216
496	0.0030099	85	145	13	205
497	0.0031425	66	147	16	228
498	0.0027487	118	155	19	192
499	0.0031907	113	153	15	193
500	0.0030411	26	125	18	224
501	0.0031076	54	134	16	214
502	0.0029657	89	145	17	201
503	0.0029391	97	149	15	201
504	0.0029858	92	135	12	178
505	0.0029475	75	145	19	215
506	0.0029204	126	166	16	206
507	0.0028798	41	135	18	229
508	0.0029687	64	139	15	214
509	0.0039015	64	128	13	192
510	0.0025767	115	143	17	171
511	0.0031816	98	158	15	218
512	0.0030461	89	130	12	171
513	0.0029469	97	144	14	191
514	0.0030335	90	146	14	202
515	0.0027068	122	152	15	182
516	0.0030665	70	145	16	220
517	0.0032135	71	142	17	213
518	0.0029681	66	142	14	218
519	0.0027906	115	169	16	223
520	0.0031225	80	151	12	222
521	0.0026893	104	153	19	202
522	0.0025893	87	141	15	195
523	0.0028887	97	140	18	183
524	0.0028897	47	131	15	215
525	0.0028536	80	138	13	196
526	0.0028697	96	150	11	204
527	0.0027388	117	155	16	193
528	0.0029362	35	127	16	219
529	0.0028851	147	173	18	199
530	0.0034024	101	152	14	203
531	0.0029981	77	148	13	219
532	0.0032295	85	147	16	209
533	0.0028253	71	142	15	213
534	0.0028501	120	156	14	192
535	0.0025229	82	139	12	196
536	0.0029988	93	151	18	209
537	0.0030012	65	140	15	215
538	0.0030911	93	146	14	199
539	0.0030302	72	134	12	196
540	0.0027987	66	137	16	208
541	0.0028658	87	148	15	209
542	0.0028903	86	144	19	202
543	0.0030456	62	132	12	202
544	0.0028828	76	134	19	192
545	0.0028379	127	162	15	197
546	0.0029807	94	150	14	206
547	0.002994	63	124	15	185
548	0.0028215	49	139	16	229
549	0.0028808	74	128	16	182
550	0.0027668	91	142	14	193
551	0.0028498	96	149	15	202
552	0.0030961	62	129	13	196
553	0.0030088	76	141	16	206
554	0.0027489	104	150	17	196
555	0.0030497	87	153	14	219
556	0.0029386	104	155	14	206
557	0.0030409	99	150	14	201
558	0.0027673	116	150	16	184
559	0.0029015	81	146	14	211
560	0.0027934	80	140	13	200
561	0.0030523	96	150	14	204
562	0.0026494	58	132	15	206
563	0.0029005	104	158	15	212
564	0.0028034	81	142	17	203
565	0.0029814	76	150	17	224
566	0.0031524	39	141	15	243
567	0.0029261	90	143	15	196
568	0.0033641	33	137	15	241
569	0.0029712	65	121	12	177
570	0.0027514	91	148	18	205
571	0.0032235	125	163	17	201
572	0.0028051	113	157	14	201
573	0.0029526	62	125	15	188
574	0.0029323	57	125	13	193
575	0.0026626	75	140	17	205
576	0.0029674	92	148	14	204
577	0.0028949	86	150	13	214
578	0.0030327	112	160	17	208
579	0.0029889	124	172	18	220
580	0.0027534	116	155	16	194
581	0.0030149	84	145	16	206
582	0.002934	85	153	14	221
583	0.0027677	46	121	16	196
584	0.0030258	131	163	15	195
585	0.0028108	62	135	18	208
586	0.0028633	79	136	15	193
587	0.0028844	41	125	16	209
588	0.0030923	65	145	16	225
589	0.0030435	145	172	17	199
590	0.0030984	138	169	17	200
591	0.0029863	106	156	14	206
592	0.0029278	74	127	14	180
593	0.0029063	82	137	12	192
594	0.0030424	52	127	13	202
595	0.0030138	85	136	15	187
596	0.0029065	85	146	13	207
597	0.0030022	114	156	15	198
598	0.0029238	80	134	12	188
599	0.0030711	123	166	17	209
600	0.0028997	111	151	13	191
601	0.0034593	70	139	15	208
602	0.0027991	82	139	12	196
603	0.0027542	110	155	19	200
604	0.0028625	64	142	18	220
605	0.0028244	78	144	18	210
606	0.0027271	125	152	18	179
607	0.0031866	65	139	15	213
608	0.0029839	39	129	18	219
609	0.0027031	53	137	19	221
610	0.0030319	87	140	15	193
611	0.0026231	104	147	16	190
612	0.0030624	52	148	16	244
613	0.0028455	72	143	13	214
614	0.002949	92	137	15	182
615	0.0030246	83	150	15	217
616	0.0030488	72	137	13	202
617	0.0027068	111	157	17	203
618	0.0028931	69	139	14	209
619	0.0031146	76	140	16	204
620	0.0027974	80	138	15	196
621	0.0029716	99	155	18	211
622	0.0028738	54	135	16	216
623	0.0030361	81	138	13	195
624	0.002863	87	141	13	195
625	0.0030149	111	154	17	197
626	0.0032152	76	142	15	208
627	0.0029043	116	167	17	218
628	0.0033211	90	143	13	196
629	0.0029147	39	140	16	241
630	0.0025627	131	152	14	173
631	0.0029103	106	146	17	186
632	0.0028267	71	139	18	207
633	0.0030391	54	135	16	216
634	0.0031035	87	147	15	207
635	0.0027384	110	144	13	178
636	0.0029326	62	138	16	214
637	0.0031006	60	142	14	224
638	0.0028385	76	139	14	202
639	0.0030702	66	140	15	214
640	0.0030152	55	136	15	217
641	0.0030231	78	142	17	206
642	0.0031559	109	157	13	205
643	0.0030241	89	137	16	185
644	0.003062	57	125	15	193
645	0.0028362	85	152	12	219
646	0.0027233	102	146	16	190
647	0.0030699	90	146	11	202
648	0.002888	52	131	16	210
649	0.0030917	143	161	16	179
650	0.0029281	30	121	18	212
651	0.002599	72	142	16	212
652	0.0030472	110	143	17	176
653	0.0030707	84	142	13	200
654	0.0029353	78	135	13	192
655	0.0029168	80	151	15	222
656	0.0029621	69	126	15	183
657	0.0030613	72	118	17	164
658	0.0029933	91	140	13	189
659	0.0030717	112	160	16	208
660	0.0030657	128	157	19	186
661	0.0030044	50	135	15	220
662	0.0027633	81	135	15	189
663	0.0030403	79	151	14	223
664	0.0029002	131	164	18	197
665	0.0026741	59	129	13	199
666	0.0029127	116	162	16	208
667	0.003102	123	155	18	187
668	0.0029666	88	156	16	224
669	0.0026353	107	155	18	203
670	0.0029323	140	159	14	178
671	0.0028724	51	147	17	243
672	0.0030661	100	150	17	200
673	0.0028518	113	149	17	185
674	0.0027813	97	141	13	185
675	0.0029812	83	133	12	183
676	0.0025442	94	144	15	194
677	0.0029132	67	132	14	197
678	0.0030231	64	135	14	206
679	0.0029027	125	156	15	187
680	0.0028832	81	143	14	205
681	0.0030413	116	158	17	200
682	0.0029089	108	143	16	178
683	0.0029267	78	155	15	232
684	0.0029576	69	141	15	213
685	0.0030249	63	137	15	211
686	0.0029313	51	124	13	197
687	0.0031334	116	171	16	226
688	0.0028916	57	125	14	193
689	0.0032781	90	150	14	210
690	0.0028542	59	133	15	207
691	0.003038	61	144	13	227
692	0.0030153	32	127	17	222
693	0.0026496	63	142	16	221
694	0.0031281	67	140	14	213
695	0.0028549	97	149	15	201
696	0.0026836	101	143	14	185
697	0.0031259	43	130	13	217
698	0.0031031	8	121	17	234
699	0.0026837	87	136	14	185
700	0.002914	83	136	15	189
701	0.0031063	98	159	17	220
702	0.003009	65	130	15	195
703	0.0028996	128	167	17	206
704	0.0028937	105	144	14	183
705	0.0028239	91	150	13	209
706	0.0029469	79	147	14	215
707	0.00295	101	157	15	213
708	0.0029664	111	151	18	191
709	0.0033954	42	132	13	222
710	0.0030504	98	136	14	174
711	0.0028158	104	150	18	196
712	0.0028002	64	150	14	236
713	0.0029668	111	148	17	185
714	0.0029059	104	143	12	182
715	0.0030623	54	128	13	202
716	0.0029397	116	159	16	202
717	0.0029902	98	131	14	164
718	0.0030101	66	142	17	218
719	0.0026132	106	145	19	184
720	0.0030106	89	144	13	199
721	0.0027089	89	156	15	223
722	0.002869	86	132	14	178
723	0.002934	74	147	16	220
724	0.0028671	98	142	16	186
725	0.0029904	100	144	14	188
726	0.0028792	83	141	13	199
727	0.0030284	77	144	13	211
728	0.0030073	137	169	16	201
729	0.0031566	56	126	14	196
730	0.0030649	85	151	16	217
731	0.0030544	76	147	14	218
732	0.0029443	65	145	16	225
733	0.002877	89	135	11	181
734	0.0028385	106	155	18	204
735	0.00281	118	154	18	190
736	0.0029196	99	156	17	213
737	0.0029686	100	149	16	198
738	0.0030719	68	133	11	198
739	0.0029057	100	155	16	210
740	0.0025958	90	137	14	184
741	0.0028349	51	125	12	199
742	0.0030976	85	145	14	205
743	0.0032813	105	146	16	187
744	0.0028993	79	133	13	187
745	0.0030463	91	136	12	181
746	0.0028864	104	141	16	178
747	0.0026649	102	151	12	200
748	0.0025244	106	146	13	186
749	0.0030053	114	157	14	200
750	0.0029766	102	149	15	196
751	0.0027717	66	135	14	204
752	0.0029438	121	157	15	193
753	0.0029846	37	128	15	219
754	0.0029414	101	159	15	217
755	0.0029924	134	162	15	190
756	0.0028625	102	147	14	192
757	0.0029929	67	124	16	181
758	0.0029441	100	142	14	184
759	0.0030366	62	132	13	202
760	0.0029155	102	143	16	184
761	0.0030716	63	134	15	205
762	0.0031482	74	135	15	196
763	0.002874	100	153	16	206
764	0.0032091	93	152	15	211
765	0.0028071	56	127	17	198
766	0.0028715	109	144	14	179
767	0.0029949	64	136	17	208
768	0.0029076	113	152	14	191
769	0.002988	116	158	15	200
770	0.0028504	62	133	16	204
771	0.0028746	120	155	15	190
772	0.0029359	99	139	13	179
773	0.0030481	102	156	15	210
774	0.0028965	54	146	16	238
775	0.0028907	111	153	15	195
776	0.0029259	81	137	14	193
777	0.0027988	78	146	14	214
778	0.0027192	119	153	17	187
779	0.0030759	37	134	17	231
780	0.003086	89	152	13	215
781	0.0029805	106	160	14	214
782	0.0029244	102	149	14	196
783	0.0029532	92	141	12	190
784	0.0029292	88	146	15	204
785	0.0034351	89	134	14	179
786	0.0029364	59	137	15	215
787	0.0029687	122	170	15	218
788	0.0029827	62	134	17	206
789	0.0030086	27	132	17	237
790	0.0028517	69	140	15	211
791	0.0028279	81	136	15	191
792	0.0030227	57	119	13	181
793	0.002774	106	148	14	190
794	0.0028431	79	140	19	201
795	0.0026639	105	155	15	205
796	0.0031249	84	138	16	192
797	0.002756	117	150	13	183
798	0.0026833	64	138	17	212
799	0.0032537	74	144	14	214
800	0.0029697	50	126	15	202
801	0.0027728	137	162	18	187
802	0.0032025	104	136	12	168
803	0.0029129	93	155	15	217
804	0.0030529	90	139	12	188
805	0.0030165	101	147	16	193
806	0.0029059	101	148	18	195
807	0.0028396	89	151	14	213
808	0.0036249	143	169	17	195
809	0.0028853	85	149	14	213
810	0.0031159	84	152	18	220
811	0.0029637	95	136	14	177
812	0.0031841	92	167	15	242
813	0.0027602	97	151	17	205
814	0.0028668	75	140	18	205
815	0.0029766	73	154	15	235
816	0.0028525	74	142	15	210
817	0.0028841	83	148	16	213
818	0.0029182	59	144	17	229
819	0.0030249	66	127	15	188
820	0.0030497	102	144	17	186
821	0.0031864	111	163	15	215
822	0.0029767	101	151	14	201
823	0.0030427	98	146	15	194
824	0.0029668	82	132	14	182
825	0.0029336	123	167	15	211
826	0.0028347	82	135	14	188
827	0.0029773	125	156	14	187
828	0.0028731	76	137	14	198
829	0.002711	65	142	17	219
830	0.0029783	73	135	12	197
831	0.0029719	129	153	13	177
832	0.0031077	128	170	13	212
833	0.0029952	110	149	15	188
834	0.0031541	150	180	17	210
835	0.0028142	88	150	14	212
836	0.0029109	71	142	14	213
837	0.0029501	49	129	17	209
838	0.0028925	75	128	14	181
839	0.0030255	91	135	14	179
840	0.0029161	64	137	17	210
841	0.0029904	77	137	13	197
842	0.0031056	73	142	15	211
843	0.0029595	63	143	16	223
844	0.002896	94	151	13	208
845	0.002916	96	137	15	178
846	0.0029246	106	149	17	192
847	0.0030137	61	146	15	231
848	0.0030684	112	151	16	190
849	0.0029956	91	137	13	183
850	0.0031922	59	139	16	219
851	0.0028256	55	136	18	217
852	0.0027274	87	142	17	197
853	0.0029029	91	158	17	225
854	0.0027384	119	159	16	199
855	0.0031083	131	162	17	193
856	0.0030531	74	136	12	198
857	0.0032015	76	147	16	218
858	0.0030045	94	148	16	202
859	0.002758	46	135	18	224
860	0.002975	94	156	16	218
861	0.0029182	70	126	14	182
862	0.0029567	108	150	13	192
863	0.0030232	78	140	12	202
864	0.002957	74	137	16	200
865	0.003243	31	131	18	231
866	0.0031413	88	140	15	192
867	0.0031333	51	135	16	219
868	0.0026334	80	139	16	198
869	0.0030636	128	159	14	190
870	0.0032796	131	160	16	189
871	0.0030465	88	149	16	210
872	0.0032325	41	128	16	215
873	0.0026652	102	161	19	220
874	0.002889	89	144	12	199
875	0.0030516	98	154	15	210
876	0.0027808	119	150	14	181
877	0.0029749	65	140	14	215
878	0.0029324	127	164	18	201
879	0.0031237	26	127	16	228
880	0.0029739	86	147	15	208
881	0.0029001	55	149	15	243
882	0.0027767	63	133	15	203
883	0.0030542	83	145	15	207
884	0.0029763	77	149	15	221
885	0.0029911	54	135	15	216
886	0.003656	84	139	15	194
887	0.0030091	97	160	17	223
888	0.0029309	110	154	15	198
889	0.0031166	58	141	15	224
890	0.0031408	95	151	14	207
891	0.0027683	100	146	14	192
892	0.0029627	72	145	13	218
893	0.0031781	84	159	15	234
894	0.0029341	102	157	17	212
895	0.0029806	74	143	15	212
896	0.0030244	100	153	16	206
897	0.0032131	64	134	14	204
898	0.0028787	110	151	13	192
899	0.0027064	118	153	15	188
900	0.0028906	40	129	14	218
901	0.0030196	85	138	14	191
902	0.0029903	82	147	17	212
903	0.0032403	15	128	14	241
904	0.0026586	114	159	19	204
905	0.0028915	93	148	16	203
906	0.0030632	64	141	13	218
907	0.0033235	72	141	14	210
908	0.0031247	82	145	13	208
909	0.0029958	114	155	15	196
910	0.0029141	81	130	16	179
911	0.0028872	102	155	15	208
912	0.0031222	54	136	12	218
913	0.0028416	62	139	15	216
914	0.0031038	85	146	16	207
915	0.0026865	107	150	18	193
916	0.0029286	43	132	15	221
917	0.002779	79	144	17	209
918	0.0025641	104	148	14	192
919	0.0028513	98	148	13	198
920	0.0029902	70	145	17	220
921	0.0031492	63	136	15	209
922	0.0031328	96	149	15	202
923	0.0032046	99	163	17	227
924	0.003146	60	135	14	210
925	0.0027743	101	164	16	227
926	0.0028658	50	125	13	200
927	0.0029292	43	130	18	217
928	0.0030082	61	137	17	213
929	0.0028512	100	153	16	206
930	0.0028168	152	177	19	202
931	0.0030524	77	149	16	221
932	0.0030369	82	138	16	194
933	0.0029568	87	137	11	187
934	0.0025979	95	146	16	197
935	0.0031762	126	158	16	190
936	0.0029583	136	174	17	212
937	0.0029008	66	128	14	190
938	0.0029982	77	140	13	203
939	0.0030498	86	144	17	202
940	0.0029262	76	149	14	222
941	0.0030302	108	154	14	200
942	0.0029961	44	131	13	218
943	0.0031057	47	139	14	231
944	0.0029773	48	136	15	224
945	0.0029731	81	133	11	185
946	0.0030669	128	162	16	196
947	0.0029763	70	140	14	210
948	0.0029425	104	141	13	178
949	0.0029577	103	142	13	181
950	0.0028564	80	139	14	198
951	0.0029924	118	144	15	170
952	0.0030304	79	129	10	179
953	0.0029322	87	138	14	189
954	0.0029779	86	144	15	202
955	0.002821	74	140	15	206
956	0.0029431	108	149	15	190
957	0.003022	75	133	13	191
958	0.0028489	138	180	17	222
959	0.0030231	71	154	16	237
960	0.0026495	126	164	16	202
961	0.0030668	77	153	18	229
962	0.003007	86	149	13	212
963	0.0029175	16	116	15	216
964	0.0029662	82	151	14	220
965	0.002891	107	152	17	197
966	0.002966	83	154	14	225
967	0.0030136	46	136	14	226
968	0.003052	76	142	17	208
969	0.0029291	76	140	15	204
970	0.0028891	85	154	14	223
971	0.0030368	76	138	17	200
972	0.0028301	64	132	15	200
973	0.0031782	90	148	17	206
974	0.002904	116	167	16	218
975	0.0029331	88	158	17	228
976	0.0029421	40	130	16	220
977	0.0031921	67	136	14	205
978	0.0028332	112	159	15	206
979	0.002969	48	128	17	208
980	0.0034979	120	165	16	210
981	0.0031055	101	152	14	203
982	0.0030105	119	160	12	201
983	0.002967	73	145	13	217
984	0.0030437	103	152	12	201
985	0.0026466	74	136	18	198
986	0.0028718	109	158	14	207
987	0.0030704	91	135	15	179
988	0.0030236	129	172	18	215
989	0.0029585	61	131	16	201
990	0.0026334	52	142	19	232
991	0.0031129	81	136	13	191
992	0.0029117	91	148	12	205
993	0.0029175	94	148	16	202
994	0.002881	46	129	13	212
995	0.0027962	120	153	16	186
996	0.0032099	104	152	16	200
997	0.0029324	57	139	19	221
998	0.0031892	68	152	15	236
999	0.0025769	133	160	18	187
mean	0.00296491	87.083	145.295	15.194	203.507

## Sheet: PolyMin_Bal
	time	SEq	Bal	Reg	Egal
0	0.0030328	49	133	16	217
1	0.0031288	75	143	16	211
2	0.0029999	50	140	14	230
3	0.0031141	95	138	14	181
4	0.0031995	89	153	13	217
5	0.0028618	61	136	17	211
6	0.0028153	71	133	15	195
7	0.0029218	104	146	15	188
8	0.0029617	61	135	18	209
9	0.0027454	85	139	12	193
10	0.0028044	110	155	17	200
11	0.0028198	73	137	15	201
12	0.0029596	70	149	14	228
13	0.0028485	94	146	15	198
14	0.0031203	104	151	16	198
15	0.0030047	81	138	11	195
16	0.0031483	106	155	17	204
17	0.0037957	108	153	14	198
18	0.0030591	122	164	18	206
19	0.003088	86	144	14	202
20	0.0030974	55	134	17	213
21	0.003039	68	136	14	204
22	0.0029917	59	138	12	217
23	0.003576	68	145	15	222
24	0.0025771	102	148	14	194
25	0.0030131	78	140	13	202
26	0.0029341	54	140	16	226
27	0.0025915	76	137	16	198
28	0.0028524	90	147	17	204
29	0.0028337	120	159	14	198
30	0.0029692	66	146	14	226
31	0.0030443	48	133	14	218
32	0.0025354	108	161	18	214
33	0.0032022	92	147	15	202
34	0.0028369	65	138	17	211
35	0.0028129	98	153	16	208
36	0.0035353	61	143	15	225
37	0.0029654	67	137	11	207
38	0.0030489	133	172	16	211
39	0.0033147	76	148	18	220
40	0.0030572	52	138	16	224
41	0.003098	104	143	14	182
42	0.0032224	37	130	15	223
43	0.0030993	69	146	15	223
44	0.0030334	103	145	13	187
45	0.0029952	80	141	14	202
46	0.0026781	99	139	14	179
47	0.0030521	68	143	14	218
48	0.0030375	88	143	14	198
49	0.0029146	101	148	14	195
50	0.0029197	85	146	15	207
51	0.003168	69	132	14	195
52	0.0031178	108	146	15	184
53	0.0029129	75	146	14	217
54	0.0027894	82	147	14	212
55	0.0029623	108	156	16	204
56	0.0028401	116	157	17	198
57	0.0028275	103	148	14	193
58	0.0030855	74	145	15	216
59	0.0028984	76	145	14	214
60	0.0029556	99	154	17	209
61	0.0029886	107	149	13	191
62	0.002822	92	151	17	210
63	0.0034556	93	144	14	195
64	0.0029495	74	142	17	210
65	0.0025493	99	152	16	205
66	0.0030424	88	135	15	182
67	0.0028799	90	143	13	196
68	0.0029977	65	147	18	229
69	0.0028461	119	159	18	199
70	0.0029401	113	143	16	173
71	0.003179	128	153	16	178
72	0.0029578	74	143	14	212
73	0.0030276	92	142	16	192
74	0.003083	53	129	13	205
75	0.0026258	95	130	14	165
76	0.0027742	106	143	14	180
77	0.0029576	99	157	16	215
78	0.0029011	105	148	15	191
79	0.0032631	84	142	16	200
80	0.0031312	69	154	18	239
81	0.0031265	69	141	17	213
82	0.0026039	79	141	17	203
83	0.0034425	107	148	13	189
84	0.0028715	59	141	15	223
85	0.003189	108	148	15	188
86	0.0029202	92	152	14	212
87	0.0026317	118	153	16	188
88	0.0029588	84	148	15	212
89	0.0032097	96	155	13	214
90	0.0028259	95	149	14	203
91	0.0029365	125	162	18	199
92	0.0026948	108	142	17	176
93	0.0030677	85	155	16	225
94	0.0028897	92	152	15	212
95	0.0027271	100	154	14	208
96	0.0031611	83	150	14	217
97	0.0030639	121	160	16	199
98	0.0028988	104	150	17	196
99	0.0030046	115	150	13	185
100	0.0029119	59	136	18	213
101	0.0035582	88	145	14	202
102	0.002991	41	126	17	211
103	0.0030015	55	135	14	215
104	0.0026487	84	151	19	218
105	0.0032723	121	184	14	247
106	0.0026145	83	135	14	187
107	0.0028833	46	121	15	196
108	0.003176	125	157	14	189
109	0.0030733	54	137	14	220
110	0.0029446	114	147	16	180
111	0.0031391	77	135	13	193
112	0.0028544	52	140	13	228
113	0.0029254	67	138	14	209
114	0.0028506	95	135	15	175
115	0.0030368	38	129	15	220
116	0.0030153	79	128	12	177
117	0.0031271	39	125	11	211
118	0.0028515	61	131	14	201
119	0.0029628	79	148	16	217
120	0.0028992	58	134	14	210
121	0.0029986	88	152	15	216
122	0.0030495	95	155	17	215
123	0.003053	62	137	15	212
124	0.0032663	60	121	12	182
125	0.0030422	109	155	13	201
126	0.0030139	83	148	14	213
127	0.0028743	43	138	17	233
128	0.0029629	78	141	14	204
129	0.0029917	114	158	17	202
130	0.0028374	124	157	17	190
131	0.0030632	103	150	16	197
132	0.0029595	107	153	15	199
133	0.0028073	41	124	15	207
134	0.0031256	79	140	14	201
135	0.0029763	87	148	13	209
136	0.0031073	111	161	16	211
137	0.0029263	96	146	18	196
138	0.0029736	122	161	13	200
139	0.0026337	93	139	18	185
140	0.0027528	117	162	14	207
141	0.0031469	96	147	15	198
142	0.002859	125	168	17	211
143	0.0031284	115	160	15	205
144	0.0026479	97	140	16	183
145	0.002896	78	148	16	218
146	0.0029811	109	148	16	187
147	0.0028534	77	135	17	193
148	0.0028617	83	147	17	211
149	0.0030872	71	147	14	223
150	0.0029722	111	158	13	205
151	0.0028533	112	161	18	210
152	0.0027157	123	165	14	207
153	0.0026657	86	147	17	208
154	0.002785	85	155	17	225
155	0.0030344	49	123	13	197
156	0.002832	50	115	15	180
157	0.0028988	129	164	18	199
158	0.0028112	95	144	18	193
159	0.002726	129	176	19	223
160	0.0029474	77	139	15	201
161	0.0025834	62	147	17	232
162	0.0032821	69	134	15	199
163	0.0032185	92	151	17	210
164	0.0031999	95	141	15	187
165	0.0029582	130	166	17	202
166	0.0029265	66	127	15	188
167	0.0032408	81	147	14	213
168	0.0031425	78	145	15	212
169	0.0029121	116	164	19	212
170	0.0029616	76	147	13	218
171	0.002955	140	169	19	198
172	0.0029621	93	140	19	187
173	0.0030385	73	140	17	207
174	0.0029188	49	128	15	207
175	0.0030112	70	145	13	220
176	0.002942	54	138	19	222
177	0.0029215	71	134	16	197
178	0.0030083	73	132	15	191
179	0.0027993	98	147	16	196
180	0.0027996	80	145	18	210
181	0.0028931	117	157	15	197
182	0.003164	85	161	15	237
183	0.0029965	102	147	15	192
184	0.0027967	108	151	16	194
185	0.0027395	119	157	19	195
186	0.0032052	84	156	18	228
187	0.002827	86	139	12	192
188	0.0030532	65	144	13	223
189	0.0031122	88	144	18	200
190	0.0030028	98	148	13	198
191	0.003022	83	144	15	205
192	0.0027413	93	149	16	205
193	0.0031371	119	169	15	219
194	0.0029185	92	142	16	192
195	0.0029245	102	145	16	188
196	0.0028731	91	150	14	209
197	0.0029929	69	137	16	205
198	0.0028756	65	149	18	233
199	0.0029261	87	135	12	183
200	0.0025379	74	142	15	210
201	0.0027695	76	135	16	194
202	0.0025624	87	143	17	199
203	0.0030056	94	157	18	220
204	0.0028422	55	131	16	207
205	0.0029612	107	145	14	183
206	0.0031037	75	141	16	207
207	0.0028244	96	149	16	202
208	0.0029344	49	133	14	217
209	0.0031175	66	140	15	214
210	0.0027674	57	119	16	181
211	0.0028459	109	160	14	211
212	0.0031559	72	147	15	222
213	0.0028626	101	148	15	195
214	0.0030637	125	156	16	187
215	0.002528	105	149	14	193
216	0.0032505	97	148	15	199
217	0.0030184	128	151	12	174
218	0.00293	82	140	12	198
219	0.0026334	72	133	16	194
220	0.0030879	113	154	16	195
221	0.0025473	91	143	15	195
222	0.0028949	60	139	16	218
223	0.0027338	81	140	16	199
224	0.0028156	112	146	12	180
225	0.0029802	64	132	15	200
226	0.0030131	113	145	14	177
227	0.0028877	80	148	14	216
228	0.0030318	115	147	14	179
229	0.0029592	105	152	17	199
230	0.0028915	98	145	16	192
231	0.0030405	67	131	13	195
232	0.003222	92	144	13	196
233	0.0030388	81	154	14	227
234	0.0029116	84	133	11	182
235	0.0028435	102	154	18	206
236	0.002834	96	155	13	214
237	0.0028298	68	143	16	218
238	0.0031542	76	136	17	196
239	0.0029872	78	149	13	220
240	0.0029959	70	147	15	224
241	0.0029617	107	158	17	209
242	0.0033229	116	160	14	204
243	0.0027377	100	153	14	206
244	0.0029375	121	159	16	197
245	0.0030254	124	156	14	188
246	0.0027918	115	147	14	179
247	0.0027386	118	160	16	202
248	0.0030977	38	124	16	210
249	0.0027676	64	132	14	200
250	0.0028528	77	133	16	189
251	0.0028486	49	132	19	215
252	0.0032046	54	136	12	218
253	0.0028046	88	146	16	204
254	0.0028438	102	142	14	182
255	0.0033039	113	157	15	201
256	0.0031478	89	144	14	199
257	0.0031152	76	147	15	218
258	0.0030776	118	149	19	180
259	0.0029024	116	150	15	184
260	0.0028081	81	143	16	205
261	0.0029612	77	141	13	205
262	0.0030534	26	135	16	244
263	0.0028563	74	140	16	206
264	0.0028244	103	148	16	193
265	0.00289	101	149	16	197
266	0.0028279	79	131	16	183
267	0.0030032	43	124	15	205
268	0.0030966	78	139	13	200
269	0.0037385	50	131	15	212
270	0.0025539	127	154	16	181
271	0.0028547	70	130	17	190
272	0.0031185	106	155	16	204
273	0.0029079	114	145	16	176
274	0.0030605	100	150	16	200
275	0.0029651	89	140	15	191
276	0.0031532	120	166	16	212
277	0.0031454	97	151	14	205
278	0.0028941	130	170	16	210
279	0.002841	103	151	19	199
280	0.0029054	47	141	19	235
281	0.0028549	73	141	15	209
282	0.0032734	51	140	15	229
283	0.0029453	33	129	16	225
284	0.0028441	106	149	17	192
285	0.0029076	47	122	12	197
286	0.0030205	147	175	18	203
287	0.0030529	71	145	16	219
288	0.003095	74	147	16	220
289	0.0029652	90	146	14	202
290	0.0029087	141	167	17	193
291	0.0029461	116	154	14	192
292	0.003123	121	154	16	187
293	0.0029543	70	151	19	232
294	0.0031489	38	134	15	230
295	0.0030783	51	141	16	231
296	0.0028619	96	134	13	172
297	0.0027585	89	134	13	179
298	0.0029494	89	138	13	187
299	0.0031315	110	175	15	240
300	0.003208	64	133	12	202
301	0.0029127	84	143	16	202
302	0.0030761	59	139	13	219
303	0.0026819	61	134	14	207
304	0.0029191	95	139	12	183
305	0.0029161	82	152	17	222
306	0.0028316	105	144	16	183
307	0.003041	75	142	16	209
308	0.0030646	103	155	13	207
309	0.0029181	102	144	12	186
310	0.0032249	79	160	18	241
311	0.0032921	142	176	16	210
312	0.0030995	76	133	14	190
313	0.0029355	88	151	14	214
314	0.0030985	106	146	18	186
315	0.0027629	85	141	19	197
316	0.0031061	69	128	14	187
317	0.0030122	40	124	17	208
318	0.0029583	106	153	13	200
319	0.0027972	121	159	16	197
320	0.0029166	117	154	13	191
321	0.003028	120	157	15	194
322	0.0029808	61	137	17	213
323	0.0030428	82	151	14	220
324	0.0031809	96	141	15	186
325	0.0028931	98	152	17	206
326	0.0029242	65	138	16	211
327	0.0030953	110	158	14	206
328	0.0030698	68	130	14	192
329	0.0027632	113	162	18	211
330	0.0032736	53	129	15	205
331	0.0027298	114	157	17	200
332	0.0028646	60	137	16	214
333	0.0029769	98	142	13	186
334	0.0031112	133	168	17	203
335	0.003307	118	153	15	188
336	0.003192	116	159	15	202
337	0.0030928	98	152	15	206
338	0.0029225	88	146	13	204
339	0.0026731	74	141	19	208
340	0.0026923	86	142	13	198
341	0.0029834	116	146	17	176
342	0.0030443	69	138	12	207
343	0.0030931	77	137	16	197
344	0.0029281	79	138	14	197
345	0.002887	98	149	15	200
346	0.0029641	71	139	16	207
347	0.0029773	81	159	15	237
348	0.0029784	96	140	11	184
349	0.0033657	121	158	14	195
350	0.0031159	98	156	17	214
351	0.0030581	112	150	12	188
352	0.0031268	139	162	13	185
353	0.0032862	83	151	16	219
354	0.002942	69	136	17	203
355	0.0031593	127	163	17	199
356	0.0030103	86	138	18	190
357	0.0027685	117	156	16	195
358	0.0029622	104	147	15	190
359	0.0031738	67	132	14	197
360	0.0029145	122	156	16	190
361	0.0027748	82	146	13	210
362	0.0026397	160	176	19	192
363	0.0032491	104	160	17	216
364	0.0029064	71	143	17	215
365	0.0029624	89	148	15	207
366	0.002911	68	141	16	214
367	0.0027783	91	139	17	187
368	0.0030367	93	153	14	213
369	0.0029081	114	143	15	172
370	0.0029975	106	147	15	188
371	0.0027701	87	153	14	219
372	0.0027551	78	140	16	202
373	0.0029967	122	170	18	218
374	0.0029735	92	147	15	202
375	0.0030347	113	155	14	197
376	0.0031566	74	146	16	218
377	0.0028776	79	148	16	217
378	0.0028444	129	161	17	193
379	0.00296	93	149	14	205
380	0.002921	99	142	14	185
381	0.0030391	70	142	14	214
382	0.0027707	107	144	18	181
383	0.0030243	101	147	14	193
384	0.0030565	81	145	13	209
385	0.0029253	76	144	14	212
386	0.0027069	112	157	19	202
387	0.0027439	78	136	15	194
388	0.0032115	69	133	13	197
389	0.0027096	72	144	18	216
390	0.0029269	98	140	16	182
391	0.0030968	74	137	12	200
392	0.0028262	93	143	15	193
393	0.002985	104	139	16	174
394	0.0028699	77	146	13	215
395	0.0031088	111	158	15	205
396	0.0030228	103	157	16	211
397	0.003228	99	152	13	205
398	0.0027321	133	161	18	189
399	0.003032	107	151	18	195
400	0.0028844	59	137	17	215
401	0.002879	85	153	15	221
402	0.0028014	56	129	17	202
403	0.0028931	79	151	15	223
404	0.0029457	93	153	13	213
405	0.0028544	45	137	15	229
406	0.0029433	47	131	13	215
407	0.0030156	150	184	16	218
408	0.0028057	89	151	14	213
409	0.0029482	81	141	13	201
410	0.0032681	64	148	13	232
411	0.0032297	65	139	16	213
412	0.0030723	113	159	17	205
413	0.0026302	80	139	16	198
414	0.0031141	69	132	17	195
415	0.002604	134	163	17	192
416	0.0028669	129	164	17	199
417	0.0031272	68	134	14	200
418	0.0029872	68	143	13	218
419	0.0027862	98	149	14	200
420	0.0028908	101	146	15	191
421	0.0028957	105	158	15	211
422	0.0031007	69	137	18	205
423	0.0031448	39	128	16	217
424	0.0029442	79	138	16	197
425	0.0030981	97	141	14	185
426	0.0031677	102	148	14	194
427	0.0029635	63	130	14	197
428	0.0031359	74	158	16	242
429	0.0026409	122	153	17	184
430	0.0029588	81	152	17	223
431	0.0033232	121	163	16	205
432	0.0030252	102	149	16	196
433	0.0028107	36	112	17	188
434	0.0029531	124	166	15	208
435	0.0029171	89	134	13	179
436	0.003155	69	140	15	211
437	0.0029593	124	164	16	204
438	0.0030375	90	144	13	198
439	0.0030651	49	128	16	207
440	0.0030253	74	147	15	220
441	0.0031385	73	134	13	195
442	0.0026682	81	131	16	181
443	0.0030996	80	140	11	200
444	0.0026031	79	139	15	199
445	0.0028024	69	137	17	205
446	0.0030316	65	135	13	205
447	0.0029357	110	163	16	216
448	0.0029159	96	161	18	226
449	0.0030293	118	148	15	178
450	0.0030263	62	134	14	206
451	0.0028337	79	142	13	205
452	0.0030278	97	145	14	193
453	0.0030033	112	160	14	208
454	0.0029603	85	136	14	187
455	0.0031047	72	143	14	214
456	0.002801	96	147	15	198
457	0.00309	51	130	18	209
458	0.0030439	140	161	17	182
459	0.0029414	83	142	14	201
460	0.0033049	42	138	14	234
461	0.0029643	101	144	18	187
462	0.0029291	77	144	17	211
463	0.0025713	97	146	19	195
464	0.003034	118	165	17	212
465	0.0027753	123	156	15	189
466	0.0031066	90	154	13	218
467	0.0028169	81	141	16	201
468	0.0031942	112	156	14	200
469	0.0027915	101	156	17	211
470	0.0027744	101	147	17	193
471	0.0030437	80	148	17	216
472	0.002853	120	155	15	190
473	0.0031098	98	143	16	188
474	0.0029814	116	160	16	204
475	0.0028598	132	152	19	172
476	0.0030749	50	136	16	222
477	0.0029275	110	147	14	184
478	0.0030305	95	149	17	203
479	0.0032635	98	149	16	200
480	0.0030338	59	135	13	211
481	0.0030177	86	156	17	226
482	0.0029414	111	161	15	211
483	0.0031849	52	130	16	208
484	0.0029997	37	139	15	241
485	0.0027497	82	134	15	186
486	0.002873	59	131	13	203
487	0.0031098	96	145	13	194
488	0.0029247	57	144	16	231
489	0.0025726	84	144	18	204
490	0.0028784	72	144	15	216
491	0.0029248	86	139	15	192
492	0.0029954	64	137	13	210
493	0.0025196	95	141	16	187
494	0.0028093	106	153	19	200
495	0.0028838	80	148	16	216
496	0.0028863	85	145	13	205
497	0.0031201	66	147	16	228
498	0.0025552	118	155	19	192
499	0.0029955	113	153	15	193
500	0.0031146	26	125	18	224
501	0.0031427	54	134	16	214
502	0.0029462	89	145	17	201
503	0.0028252	97	149	15	201
504	0.0029457	92	135	12	178
505	0.0028601	75	145	19	215
506	0.0028968	126	166	16	206
507	0.0029538	41	135	18	229
508	0.0029632	64	139	15	214
509	0.0028098	64	128	13	192
510	0.0026656	115	143	17	171
511	0.0028676	98	158	15	218
512	0.0029746	89	130	12	171
513	0.0027474	97	144	14	191
514	0.0030071	90	146	14	202
515	0.0028308	122	152	15	182
516	0.0028745	70	145	16	220
517	0.0038344	71	142	17	213
518	0.0030993	66	142	14	218
519	0.0027365	115	169	16	223
520	0.003171	80	151	12	222
521	0.0029224	104	153	19	202
522	0.0026444	87	141	15	195
523	0.0029639	97	140	18	183
524	0.0027659	47	131	15	215
525	0.0028088	80	138	13	196
526	0.0031412	96	150	11	204
527	0.0027021	117	155	16	193
528	0.0030791	35	127	16	219
529	0.0028261	147	173	18	199
530	0.0031346	101	152	14	203
531	0.0029745	77	148	13	219
532	0.0030109	85	147	16	209
533	0.0029601	71	142	15	213
534	0.002997	120	156	14	192
535	0.0026308	82	139	12	196
536	0.0030964	93	151	18	209
537	0.0029374	65	140	15	215
538	0.0029853	93	146	14	199
539	0.0029821	72	134	12	196
540	0.002847	66	137	16	208
541	0.0030079	87	148	15	209
542	0.0029453	86	144	19	202
543	0.0028894	62	132	12	202
544	0.0031684	76	134	19	192
545	0.0029152	127	162	15	197
546	0.003065	94	150	14	206
547	0.0029832	63	124	15	185
548	0.0030553	49	139	16	229
549	0.0028652	74	128	16	182
550	0.0028902	91	142	14	193
551	0.0032311	96	149	15	202
552	0.0031887	62	129	13	196
553	0.0028751	76	141	16	206
554	0.0027945	104	150	17	196
555	0.0030724	87	153	14	219
556	0.0028918	104	155	14	206
557	0.0029821	99	150	14	201
558	0.0028401	116	150	16	184
559	0.0030978	81	146	14	211
560	0.0028373	80	140	13	200
561	0.003291	96	150	14	204
562	0.0025494	58	132	15	206
563	0.0029781	104	158	15	212
564	0.0030731	81	142	17	203
565	0.0030125	76	150	17	224
566	0.0029592	39	141	15	243
567	0.0031358	90	143	15	196
568	0.0030107	33	137	15	241
569	0.0029889	65	121	12	177
570	0.0030652	91	148	18	205
571	0.0031533	125	163	17	201
572	0.0028467	113	157	14	201
573	0.0030371	62	125	15	188
574	0.0030803	57	125	13	193
575	0.0027068	75	140	17	205
576	0.0029136	92	148	14	204
577	0.0028726	86	150	13	214
578	0.0030097	112	160	17	208
579	0.0029618	124	172	18	220
580	0.0029532	116	155	16	194
581	0.0029403	84	145	16	206
582	0.0033136	85	153	14	221
583	0.0028547	46	121	16	196
584	0.0030081	131	163	15	195
585	0.0027479	62	135	18	208
586	0.0026961	79	136	15	193
587	0.0027741	41	125	16	209
588	0.0028804	65	145	16	225
589	0.0033275	145	172	17	199
590	0.0028322	138	169	17	200
591	0.0028997	106	156	14	206
592	0.0028587	74	127	14	180
593	0.0031192	82	137	12	192
594	0.0029742	52	127	13	202
595	0.0030651	85	136	15	187
596	0.0029349	85	146	13	207
597	0.0031986	114	156	15	198
598	0.0029321	80	134	12	188
599	0.0028795	123	166	17	209
600	0.0029471	111	151	13	191
601	0.0031858	70	139	15	208
602	0.0029146	82	139	12	196
603	0.0029644	110	155	19	200
604	0.0029697	64	142	18	220
605	0.0032033	78	144	18	210
606	0.0028356	125	152	18	179
607	0.0030791	65	139	15	213
608	0.0028746	39	129	18	219
609	0.0028466	53	137	19	221
610	0.0026756	87	140	15	193
611	0.0026052	104	147	16	190
612	0.0030846	52	148	16	244
613	0.0028718	72	143	13	214
614	0.003072	92	137	15	182
615	0.0029947	83	150	15	217
616	0.0029081	72	137	13	202
617	0.0027406	111	157	17	203
618	0.0030586	69	139	14	209
619	0.0030582	76	140	16	204
620	0.0027961	80	138	15	196
621	0.0027363	99	155	18	211
622	0.0031295	54	135	16	216
623	0.0031303	81	138	13	195
624	0.0030821	87	141	13	195
625	0.0027908	111	154	17	197
626	0.0030772	76	142	15	208
627	0.0029874	116	167	17	218
628	0.0030784	90	143	13	196
629	0.0032716	39	140	16	241
630	0.0025149	131	152	14	173
631	0.0028103	106	146	17	186
632	0.002691	71	139	18	207
633	0.0030896	54	135	16	216
634	0.0027271	87	147	15	207
635	0.0027609	110	144	13	178
636	0.0029553	62	138	16	214
637	0.0028459	60	142	14	224
638	0.0029647	76	139	14	202
639	0.0030224	66	140	15	214
640	0.0030969	55	136	15	217
641	0.0028788	78	142	17	206
642	0.002835	109	157	13	205
643	0.0028377	89	137	16	185
644	0.0031129	57	125	15	193
645	0.0028025	85	152	12	219
646	0.0027317	102	146	16	190
647	0.0036297	90	146	11	202
648	0.0028295	52	131	16	210
649	0.0031919	143	161	16	179
650	0.0030609	30	121	18	212
651	0.0027458	72	142	16	212
652	0.0027906	110	143	17	176
653	0.0027896	84	142	13	200
654	0.0029936	78	135	13	192
655	0.002993	80	151	15	222
656	0.0029651	69	126	15	183
657	0.0028455	72	118	17	164
658	0.0028077	91	140	13	189
659	0.0027867	112	160	16	208
660	0.0030784	128	157	19	186
661	0.0030903	50	135	15	220
662	0.0028462	81	135	15	189
663	0.0030725	79	151	14	223
664	0.0027611	131	164	18	197
665	0.0026639	59	129	13	199
666	0.0028143	116	162	16	208
667	0.0028971	123	155	18	187
668	0.0029829	88	156	16	224
669	0.0026881	107	155	18	203
670	0.0029171	140	159	14	178
671	0.0029202	51	147	17	243
672	0.0027923	100	150	17	200
673	0.0030215	113	149	17	185
674	0.0025626	97	141	13	185
675	0.0031969	83	133	12	183
676	0.0027072	94	144	15	194
677	0.0028301	67	132	14	197
678	0.0030507	64	135	14	206
679	0.0029169	125	156	15	187
680	0.0030302	81	143	14	205
681	0.0030205	116	158	17	200
682	0.0029338	108	143	16	178
683	0.0028498	78	155	15	232
684	0.0031402	69	141	15	213
685	0.0030768	63	137	15	211
686	0.0030634	51	124	13	197
687	0.002953	116	171	16	226
688	0.0028484	57	125	14	193
689	0.003103	90	150	14	210
690	0.0030669	59	133	15	207
691	0.0031239	61	144	13	227
692	0.003052	32	127	17	222
693	0.002796	63	142	16	221
694	0.0031452	67	140	14	213
695	0.0028875	97	149	15	201
696	0.0027234	101	143	14	185
697	0.0028745	43	130	13	217
698	0.0029934	8	121	17	234
699	0.0026181	87	136	14	185
700	0.0028403	83	136	15	189
701	0.0029059	98	159	17	220
702	0.0030668	65	130	15	195
703	0.0028213	128	167	17	206
704	0.0027944	105	144	14	183
705	0.0030215	91	150	13	209
706	0.0031011	79	147	14	215
707	0.0027742	101	157	15	213
708	0.002899	111	151	18	191
709	0.0030749	42	132	13	222
710	0.0029147	98	136	14	174
711	0.0028484	104	150	18	196
712	0.0030882	64	150	14	236
713	0.0027793	111	148	17	185
714	0.0028989	104	143	12	182
715	0.0029396	54	128	13	202
716	0.0029365	116	159	16	202
717	0.0028827	98	131	14	164
718	0.0030208	66	142	17	218
719	0.0026519	106	145	19	184
720	0.0028315	89	144	13	199
721	0.0026157	89	156	15	223
722	0.0028644	86	132	14	178
723	0.0030876	74	147	16	220
724	0.0034707	98	142	16	186
725	0.0030147	100	144	14	188
726	0.0029983	83	141	13	199
727	0.0030659	77	144	13	211
728	0.0030665	137	169	16	201
729	0.0030326	56	126	14	196
730	0.0030438	85	151	16	217
731	0.0029029	76	147	14	218
732	0.0030418	65	145	16	225
733	0.0028688	89	135	11	181
734	0.0028008	106	155	18	204
735	0.0027739	118	154	18	190
736	0.0031422	99	156	17	213
737	0.0030757	100	149	16	198
738	0.0029424	68	133	11	198
739	0.0028978	100	155	16	210
740	0.0026642	90	137	14	184
741	0.0027471	51	125	12	199
742	0.003169	85	145	14	205
743	0.0032097	105	146	16	187
744	0.0028767	79	133	13	187
745	0.0029698	91	136	12	181
746	0.0031051	104	141	16	178
747	0.0026816	102	151	12	200
748	0.0026331	106	146	13	186
749	0.0029643	114	157	14	200
750	0.0029422	102	149	15	196
751	0.0030593	66	135	14	204
752	0.0027747	121	157	15	193
753	0.0030215	37	128	15	219
754	0.0028843	101	159	15	217
755	0.0029863	134	162	15	190
756	0.0029776	102	147	14	192
757	0.0029955	67	124	16	181
758	0.0029707	100	142	14	184
759	0.0029055	62	132	13	202
760	0.0029092	102	143	16	184
761	0.0030408	63	134	15	205
762	0.0027893	74	135	15	196
763	0.0028321	100	153	16	206
764	0.0029014	93	152	15	211
765	0.0026584	56	127	17	198
766	0.0027973	109	144	14	179
767	0.0030382	64	136	17	208
768	0.0029593	113	152	14	191
769	0.0030719	116	158	15	200
770	0.0030829	62	133	16	204
771	0.0031226	120	155	15	190
772	0.0027546	99	139	13	179
773	0.0030501	105	151	16	197
774	0.003118	54	146	16	238
775	0.0028406	111	153	15	195
776	0.0029328	81	137	14	193
777	0.0027766	78	146	14	214
778	0.0027465	119	153	17	187
779	0.0030647	37	134	17	231
780	0.0029343	89	152	13	215
781	0.0030371	106	160	14	214
782	0.0030423	102	149	14	196
783	0.0032414	92	141	12	190
784	0.0030339	88	146	15	204
785	0.0028517	89	134	14	179
786	0.0030608	59	137	15	215
787	0.0029234	122	170	15	218
788	0.0028077	62	134	17	206
789	0.0031059	27	132	17	237
790	0.0029671	69	140	15	211
791	0.0027408	81	136	15	191
792	0.0030082	57	119	13	181
793	0.0029076	106	148	14	190
794	0.0028162	79	140	19	201
795	0.0027102	105	155	15	205
796	0.0031306	84	138	16	192
797	0.0029469	117	150	13	183
798	0.0026395	64	138	17	212
799	0.0029677	74	144	14	214
800	0.00285	50	126	15	202
801	0.0027814	137	162	18	187
802	0.0029463	104	136	12	168
803	0.0028653	93	155	15	217
804	0.0029093	90	139	12	188
805	0.003047	101	147	16	193
806	0.0029287	101	148	18	195
807	0.0028749	89	151	14	213
808	0.003073	143	169	17	195
809	0.0029892	85	149	14	213
810	0.0029849	84	152	18	220
811	0.0031968	95	136	14	177
812	0.0029776	92	167	15	242
813	0.0026483	97	151	17	205
814	0.002917	75	140	18	205
815	0.0031801	73	154	15	235
816	0.0030311	74	142	15	210
817	0.0029074	83	148	16	213
818	0.0029685	59	144	17	229
819	0.0028387	66	127	15	188
820	0.0030089	102	144	17	186
821	0.0029903	111	163	15	215
822	0.0029812	101	151	14	201
823	0.0031446	98	146	15	194
824	0.002971	82	132	14	182
825	0.0030994	123	167	15	211
826	0.0029108	82	135	14	188
827	0.0029463	125	156	14	187
828	0.0030347	76	137	14	198
829	0.0025809	65	142	17	219
830	0.0029417	73	135	12	197
831	0.0029329	129	153	13	177
832	0.0035607	128	170	13	212
833	0.0027724	110	149	15	188
834	0.0031475	150	180	17	210
835	0.002917	88	150	14	212
836	0.0029081	71	142	14	213
837	0.0030236	49	129	17	209
838	0.0028846	75	128	14	181
839	0.0029637	91	135	14	179
840	0.0030924	64	137	17	210
841	0.0029178	77	137	13	197
842	0.003184	73	142	15	211
843	0.0030329	63	143	16	223
844	0.0029591	94	151	13	208
845	0.0027982	96	137	15	178
846	0.002813	106	149	17	192
847	0.0032245	61	146	15	231
848	0.0029551	112	151	16	190
849	0.002994	91	137	13	183
850	0.0028662	59	139	16	219
851	0.0028463	55	136	18	217
852	0.0030725	87	142	17	197
853	0.0029478	91	158	17	225
854	0.0027575	119	159	16	199
855	0.0027811	131	162	17	193
856	0.0028851	74	136	12	198
857	0.0032776	76	147	16	218
858	0.0030452	94	148	16	202
859	0.0030046	46	135	18	224
860	0.0029999	94	156	16	218
861	0.0029288	70	126	14	182
862	0.0027809	108	150	13	192
863	0.002993	78	140	12	202
864	0.0030043	74	137	16	200
865	0.0029883	31	131	18	231
866	0.0029821	88	140	15	192
867	0.0032557	51	135	16	219
868	0.0026998	80	139	16	198
869	0.0028575	128	159	14	190
870	0.0027581	131	160	16	189
871	0.003284	88	149	16	210
872	0.0034196	41	128	16	215
873	0.0027118	102	161	19	220
874	0.0028799	89	144	12	199
875	0.0029879	98	154	15	210
876	0.002699	119	150	14	181
877	0.0029233	65	140	14	215
878	0.0029966	127	164	18	201
879	0.0031011	26	127	16	228
880	0.0030781	86	147	15	208
881	0.0029592	55	149	15	243
882	0.0029345	63	133	15	203
883	0.0031735	83	145	15	207
884	0.0030488	77	149	15	221
885	0.0029928	54	135	15	216
886	0.0031824	84	139	15	194
887	0.0030788	97	160	17	223
888	0.0028754	110	154	15	198
889	0.0030343	58	141	15	224
890	0.0029888	95	151	14	207
891	0.00272	100	146	14	192
892	0.0031275	72	145	13	218
893	0.0034655	84	159	15	234
894	0.0033256	102	157	17	212
895	0.0032063	74	143	15	212
896	0.002944	100	153	16	206
897	0.0030209	64	134	14	204
898	0.0027883	110	151	13	192
899	0.0025473	118	153	15	188
900	0.0029839	40	129	14	218
901	0.0028635	85	138	14	191
902	0.0030739	82	147	17	212
903	0.0030348	15	128	14	241
904	0.0025914	114	159	19	204
905	0.0030298	93	148	16	203
906	0.0030411	64	141	13	218
907	0.0030168	72	141	14	210
908	0.0032258	82	145	13	208
909	0.0032865	114	155	15	196
910	0.0028348	81	130	16	179
911	0.0029399	102	155	15	208
912	0.0030724	54	136	12	218
913	0.0030909	62	139	15	216
914	0.0030262	85	146	16	207
915	0.0027634	107	150	18	193
916	0.003041	43	132	15	221
917	0.002763	79	144	17	209
918	0.0027918	104	148	14	192
919	0.0027904	98	148	13	198
920	0.0032241	70	145	17	220
921	0.0029713	63	136	15	209
922	0.0030857	96	149	15	202
923	0.0028248	99	163	17	227
924	0.0030577	60	135	14	210
925	0.0030793	101	164	16	227
926	0.0031955	50	125	13	200
927	0.0031973	43	130	18	217
928	0.0031107	61	137	17	213
929	0.002742	100	153	16	206
930	0.0027899	152	177	19	202
931	0.0031025	77	149	16	221
932	0.0028542	82	138	16	194
933	0.0027787	87	137	11	187
934	0.0025979	95	146	16	197
935	0.0029472	126	158	16	190
936	0.0030646	136	174	17	212
937	0.002981	66	128	14	190
938	0.0030276	77	140	13	203
939	0.0029503	86	144	17	202
940	0.0032433	76	149	14	222
941	0.0030544	108	154	14	200
942	0.0030229	44	131	13	218
943	0.0030987	47	139	14	231
944	0.0028939	48	136	15	224
945	0.0029043	81	133	11	185
946	0.0031488	128	162	16	196
947	0.0030012	70	140	14	210
948	0.0030566	104	141	13	178
949	0.0029162	103	142	13	181
950	0.0029064	80	139	14	198
951	0.0027699	118	144	15	170
952	0.0029323	79	129	10	179
953	0.0028723	87	138	14	189
954	0.0028558	86	144	15	202
955	0.0027979	74	140	15	206
956	0.0027973	108	149	15	190
957	0.003001	75	133	13	191
958	0.0028463	138	180	17	222
959	0.0029905	71	154	16	237
960	0.002675	126	164	16	202
961	0.0029982	77	153	18	229
962	0.0030646	86	149	13	212
963	0.0030567	16	116	15	216
964	0.0030439	82	151	14	220
965	0.0028805	107	152	17	197
966	0.0029956	83	154	14	225
967	0.0029387	46	136	14	226
968	0.0028033	76	142	17	208
969	0.0029647	76	140	15	204
970	0.0029287	85	154	14	223
971	0.002928	76	138	17	200
972	0.0027613	64	132	15	200
973	0.0028674	90	148	17	206
974	0.0029389	116	167	16	218
975	0.0028566	88	158	17	228
976	0.0029883	40	130	16	220
977	0.0030255	67	136	14	205
978	0.0028986	112	159	15	206
979	0.0028772	48	128	17	208
980	0.0029975	120	165	16	210
981	0.0029647	101	152	14	203
982	0.0034318	119	160	12	201
983	0.0029533	73	145	13	217
984	0.0029622	103	152	12	201
985	0.0026964	74	136	18	198
986	0.0029841	109	158	14	207
987	0.0031722	91	135	15	179
988	0.0030937	135	169	18	203
989	0.0027317	61	131	16	201
990	0.0027784	52	142	19	232
991	0.0029803	81	136	13	191
992	0.0028989	91	148	12	205
993	0.0028608	94	148	16	202
994	0.0032423	46	129	13	212
995	0.0025862	120	153	16	186
996	0.0030787	104	152	16	200
997	0.0030145	57	139	19	221
998	0.003236	68	152	15	236
999	0.0027299	133	160	18	187
mean	0.00295925	87.103	145.284	15.197	203.465

## Sheet: DACC_D
	time	SEq	Bal	Reg	Egal
0	0.0005205	103	155	18	207
1	0.0005653	161	186	19	211
2	0.0007756	75	147	14	219
3	0.0005548	101	141	14	181
4	0.0006608	89	153	13	217
5	0.0006319	61	136	17	211
6	0.0005629	87	137	16	187
7	0.0005666	104	146	15	188
8	0.000549	61	135	18	209
9	0.0005596	85	139	12	193
10	0.0005226	110	155	17	200
11	0.0005478	108	150	15	192
12	0.0006088	70	149	14	228
13	0.0005449	94	146	15	198
14	0.0007555	126	161	16	196
15	0.0006007	101	146	13	191
16	0.0005867	106	155	17	204
17	0.0006471	108	153	14	198
18	0.0006708	122	164	18	206
19	0.0005197	105	149	17	193
20	0.0005689	75	143	17	211
21	0.0006184	107	147	16	187
22	0.0005145	143	177	17	211
23	0.0006159	86	153	15	220
24	0.0005587	102	148	14	194
25	0.0005667	78	140	13	202
26	0.000614	91	147	17	203
27	0.0007817	76	137	16	198
28	0.0007116	90	147	17	204
29	0.0005607	120	159	14	198
30	0.0007317	94	150	15	206
31	0.0005946	48	133	14	218
32	0.0006482	108	161	18	214
33	0.000648	82	144	17	206
34	0.0005544	80	147	17	214
35	0.0005717	98	153	16	208
36	0.0005539	137	177	17	217
37	0.0005183	138	166	17	194
38	0.000789	118	166	16	214
39	0.0006985	122	171	16	220
40	0.0005504	100	154	16	208
41	0.0005009	104	143	14	182
42	0.0005603	103	151	17	199
43	0.0006147	90	155	18	220
44	0.0005337	121	155	17	189
45	0.0005149	119	154	16	189
46	0.0006696	99	139	14	179
47	0.0005731	101	151	18	201
48	0.000545	87	141	15	195
49	0.000561	101	148	14	195
50	0.000545	85	146	15	207
51	0.0004921	126	164	18	202
52	0.0005034	108	146	15	184
53	0.0005499	92	152	14	212
54	0.0005484	114	158	14	202
55	0.0004974	134	166	18	198
56	0.0006101	116	157	17	198
57	0.0006781	103	148	14	193
58	0.0005862	65	143	15	221
59	0.000699	99	154	16	209
60	0.0007251	79	144	18	209
61	0.0006094	107	149	13	191
62	0.0005537	92	151	17	210
63	0.0005233	141	161	16	181
64	0.0005576	117	159	18	201
65	0.0006949	99	152	16	205
66	0.0005156	108	148	16	188
67	0.0006093	90	143	13	196
68	0.000593	70	149	18	228
69	0.000709	119	159	18	199
70	0.0005588	113	143	16	173
71	0.0005631	128	153	16	178
72	0.0005819	74	143	14	212
73	0.0004767	123	156	18	189
74	0.0005328	105	151	17	197
75	0.0005326	95	130	14	165
76	0.0005744	106	143	14	180
77	0.0006114	99	157	16	215
78	0.0005149	111	154	17	197
79	0.0005394	116	159	19	202
80	0.0005636	123	168	18	213
81	0.0007273	69	141	17	213
82	0.0006215	79	141	17	203
83	0.000581	137	160	15	183
84	0.0006192	97	154	19	211
85	0.0004312	108	148	15	188
86	0.0005873	154	186	19	218
87	0.0005739	118	153	16	188
88	0.0006062	105	154	16	203
89	0.0007346	113	160	14	207
90	0.0007062	103	153	14	203
91	0.0006497	125	162	18	199
92	0.0004961	108	142	17	176
93	0.0005477	140	170	17	200
94	0.0005981	92	152	15	212
95	0.000556	100	154	14	208
96	0.0006121	83	150	14	217
97	0.0006192	121	160	16	199
98	0.0006138	104	150	17	196
99	0.0006074	115	150	13	185
100	0.0006478	59	136	18	213
101	0.0004508	129	157	17	185
102	0.0005982	135	171	18	207
103	0.0006914	55	135	14	215
104	0.000697	84	151	19	218
105	0.0006684	133	187	16	241
106	0.0005222	83	135	14	187
107	0.0007463	63	126	15	189
108	0.0005482	125	157	14	189
109	0.0005706	104	157	15	210
110	0.0006562	69	133	16	197
111	0.0007041	105	144	16	183
112	0.0005707	85	147	14	209
113	0.0006241	98	147	14	196
114	0.0004959	95	135	15	175
115	0.0005701	119	156	18	193
116	0.0004792	79	128	12	177
117	0.0005316	109	154	19	199
118	0.0006718	61	131	14	201
119	0.000659	79	148	16	217
120	0.0006751	95	152	19	209
121	0.0006315	134	172	19	210
122	0.000655	117	163	19	209
123	0.0006632	80	143	16	206
124	0.0005303	106	141	15	176
125	0.0006248	132	168	19	204
126	0.0006765	118	164	18	210
127	0.0005084	107	158	17	209
128	0.0006501	136	162	19	188
129	0.0007154	114	158	17	202
130	0.0005501	87	142	17	197
131	0.0006301	103	150	16	197
132	0.0006688	107	153	15	199
133	0.0005714	89	139	15	189
134	0.0006091	141	173	17	205
135	0.0006368	142	170	16	198
136	0.0007477	111	161	16	211
137	0.0008467	116	155	19	194
138	0.0005331	142	165	14	188
139	0.0005619	93	139	18	185
140	0.0005099	117	162	14	207
141	0.000615	67	136	18	205
142	0.0006963	116	164	17	212
143	0.0004646	115	160	15	205
144	0.0005276	97	140	16	183
145	0.000614	69	147	16	225
146	0.0005493	119	154	16	189
147	0.0006529	77	135	17	193
148	0.000866	83	147	17	211
149	0.0005242	106	158	15	210
150	0.0004936	124	163	16	202
151	0.0005447	112	161	18	210
152	0.0007193	123	165	14	207
153	0.0009989	86	147	17	208
154	0.000601	85	155	17	225
155	0.0005739	104	142	14	180
156	0.0005303	106	138	19	170
157	0.0005947	129	164	18	199
158	0.0005195	95	144	18	193
159	0.0007269	129	176	19	223
160	0.000527	125	158	18	191
161	0.0006788	62	147	17	232
162	0.0006041	83	140	15	197
163	0.0005778	106	159	17	212
164	0.0004703	103	147	15	191
165	0.000503	139	172	17	205
166	0.0005527	87	139	16	191
167	0.000558	116	158	15	200
168	0.0005776	96	150	16	204
169	0.0006497	116	164	19	212
170	0.0005492	106	154	16	202
171	0.0007146	119	160	19	201
172	0.0008353	93	140	19	187
173	0.0005071	120	165	19	210
174	0.0005736	113	158	19	203
175	0.0005268	110	159	15	208
176	0.0007265	54	138	19	222
177	0.0006454	71	134	16	197
178	0.0005092	105	147	17	189
179	0.0007	98	147	16	196
180	0.0007608	80	145	18	210
181	0.0008829	117	157	15	197
182	0.0006334	136	180	18	224
183	0.0005921	102	147	15	192
184	0.0005462	137	160	18	183
185	0.0006482	119	157	19	195
186	0.000495	130	179	17	228
187	0.000551	86	139	12	192
188	0.0007397	65	144	13	223
189	0.0004632	113	153	18	193
190	0.0006267	122	156	13	190
191	0.0006851	54	136	19	218
192	0.0007546	123	162	19	201
193	0.0005306	155	183	19	211
194	0.0005369	92	142	16	192
195	0.0004748	110	150	16	190
196	0.0005202	96	153	14	210
197	0.000691	69	137	16	205
198	0.0006985	73	152	18	231
199	0.0005437	116	154	18	192
200	0.0006003	74	142	15	210
201	0.0007642	53	127	18	201
202	0.0007644	87	143	17	199
203	0.0007857	81	154	18	227
204	0.000557	102	146	18	190
205	0.0004882	107	145	14	183
206	0.0005783	101	157	18	213
207	0.0005875	107	155	16	203
208	0.0006427	49	133	14	217
209	0.0006543	128	160	16	192
210	0.0005596	57	119	16	181
211	0.0007787	72	151	19	230
212	0.0005398	90	150	15	210
213	0.0006017	101	148	15	195
214	0.0005469	125	156	16	187
215	0.0006235	105	149	14	193
216	0.000528	128	162	18	196
217	0.0006065	128	151	12	174
218	0.0005511	82	140	12	198
219	0.0005362	72	133	16	194
220	0.0007307	113	154	16	195
221	0.000686	91	143	15	195
222	0.0006696	89	147	16	205
223	0.0006087	81	140	16	199
224	0.0005186	134	163	19	192
225	0.0005438	64	132	15	200
226	0.0007803	113	145	14	177
227	0.0006644	88	154	14	220
228	0.0007075	115	147	14	179
229	0.0009727	105	152	17	199
230	0.0005753	77	139	18	201
231	0.0005756	102	144	16	186
232	0.0007516	123	156	14	189
233	0.0006051	108	165	17	222
234	0.0006597	84	133	11	182
235	0.0005692	102	154	18	206
236	0.0005814	96	155	13	214
237	0.000741	68	143	16	218
238	0.000525	108	151	17	194
239	0.0006923	126	172	18	218
240	0.000534	116	161	17	206
241	0.0005595	107	158	17	209
242	0.0005929	116	160	14	204
243	0.00051	124	164	18	204
244	0.0004951	121	159	16	197
245	0.0006639	124	156	14	188
246	0.0006174	115	147	14	179
247	0.0005541	118	160	16	202
248	0.000648	38	124	16	210
249	0.0005729	78	135	14	192
250	0.0005846	77	133	16	189
251	0.0006316	93	152	19	211
252	0.0006001	128	166	16	204
253	0.000513	88	146	16	204
254	0.0005414	102	142	14	182
255	0.0006389	113	157	15	201
256	0.0006025	89	144	14	199
257	0.00058	89	153	15	217
258	0.0005877	92	140	19	188
259	0.0006368	83	144	18	205
260	0.0005853	85	145	16	205
261	0.0006146	127	154	15	181
262	0.0006587	52	142	16	232
263	0.0005491	141	167	16	193
264	0.0006301	103	148	16	193
265	0.000638	101	149	16	197
266	0.0004903	115	144	17	173
267	0.0006299	52	130	13	208
268	0.0005014	113	146	14	179
269	0.0005642	142	176	18	210
270	0.0006032	127	154	16	181
271	0.0006349	96	140	17	184
272	0.000585	128	171	17	214
273	0.0004957	114	145	16	176
274	0.0005643	100	150	16	200
275	0.0005262	89	140	15	191
276	0.0007645	113	161	16	209
277	0.0006565	97	151	14	205
278	0.0006851	48	139	18	230
279	0.000566	103	151	19	199
280	0.0006857	60	146	19	232
281	0.0005535	116	151	15	186
282	0.0006882	105	154	18	203
283	0.0006093	83	146	18	209
284	0.0005458	97	145	17	193
285	0.0005721	47	122	12	197
286	0.0006596	126	165	18	204
287	0.000617	114	167	18	220
288	0.0006136	54	137	18	220
289	0.0005167	108	153	17	198
290	0.0005107	141	167	17	193
291	0.000593	88	147	14	206
292	0.0005733	121	154	16	187
293	0.0007384	70	151	19	232
294	0.0005053	112	155	15	198
295	0.00071	67	147	16	227
296	0.0004437	117	142	18	167
297	0.0004797	89	134	13	179
298	0.000615	89	138	13	187
299	0.0005391	149	189	16	229
300	0.0005532	135	168	19	201
301	0.0006494	84	143	16	202
302	0.0006753	99	147	13	195
303	0.0007173	61	134	14	207
304	0.0006341	95	139	12	183
305	0.0007238	88	155	18	222
306	0.0004953	119	148	17	177
307	0.0007369	122	166	18	210
308	0.0006208	103	155	13	207
309	0.0004992	134	161	18	188
310	0.0005186	147	179	19	211
311	0.0006333	81	147	18	213
312	0.0005678	90	139	15	188
313	0.0005998	111	159	17	207
314	0.0007206	106	146	18	186
315	0.0006043	85	141	19	197
316	0.0004453	115	143	16	171
317	0.0005873	79	141	17	203
318	0.0005842	135	171	17	207
319	0.0007093	61	141	18	221
320	0.0004702	117	154	13	191
321	0.0005368	120	157	15	194
322	0.0006493	76	146	15	216
323	0.0006148	177	190	19	203
324	0.0006084	96	141	15	186
325	0.0006071	76	142	17	208
326	0.000522	109	161	17	213
327	0.0005214	110	158	14	206
328	0.0005963	43	123	16	203
329	0.0005055	125	171	18	217
330	0.0004961	119	150	18	181
331	0.0005303	114	157	17	200
332	0.0005831	91	147	16	203
333	0.0004723	98	142	13	186
334	0.000693	133	168	17	203
335	0.0005936	118	153	15	188
336	0.0006017	116	159	15	202
337	0.0006369	98	152	15	206
338	0.0005729	88	146	13	204
339	0.0006352	74	141	19	208
340	0.0006636	86	142	13	198
341	0.0006233	116	146	17	176
342	0.0005758	142	171	18	200
343	0.000584	59	125	18	191
344	0.0007055	41	132	18	223
345	0.0006742	98	149	15	200
346	0.0006274	71	139	16	207
347	0.000619	103	167	18	231
348	0.0004445	96	140	11	184
349	0.0006279	121	158	14	195
350	0.0004796	119	160	17	201
351	0.0005245	126	159	15	192
352	0.0005059	101	151	15	201
353	0.0006205	91	153	16	215
354	0.0006679	69	136	17	203
355	0.000584	127	163	17	199
356	0.0005955	103	147	19	191
357	0.0007	117	156	16	195
358	0.0005085	104	147	15	190
359	0.0006056	67	132	14	197
360	0.0006424	51	134	18	217
361	0.0007121	116	156	14	196
362	0.000854	160	176	19	192
363	0.0005701	133	175	17	217
364	0.0007284	91	147	17	203
365	0.00064	108	153	16	198
366	0.0006164	84	145	16	206
367	0.0006622	56	130	18	204
368	0.0007195	93	153	14	213
369	0.0005843	114	143	15	172
370	0.0007091	106	147	15	188
371	0.0006935	87	153	14	219
372	0.0006362	78	140	16	202
373	0.0005794	91	158	18	225
374	0.0008699	106	156	18	206
375	0.0007551	113	155	14	197
376	0.0006629	143	174	18	205
377	0.0006785	90	153	16	216
378	0.0005836	93	148	17	203
379	0.0005539	106	152	15	198
380	0.0005961	99	142	14	185
381	0.0005565	108	158	17	208
382	0.0006152	107	144	18	181
383	0.0005484	101	147	14	193
384	0.0007181	81	145	13	209
385	0.0005468	118	159	15	200
386	0.0006561	112	157	19	202
387	0.0007182	78	136	15	194
388	0.0005454	118	156	15	194
389	0.0007376	57	141	18	225
390	0.0006697	98	140	16	182
391	0.0005134	74	137	12	200
392	0.0004858	117	151	17	185
393	0.0005765	104	139	16	174
394	0.0009608	77	146	13	215
395	0.0005391	122	167	19	212
396	0.0006503	103	157	16	211
397	0.0005917	99	152	13	205
398	0.0007024	115	156	18	197
399	0.000583	107	151	18	195
400	0.0006124	95	154	17	213
401	0.0006912	102	159	15	216
402	0.0006724	56	129	17	202
403	0.0007314	93	160	15	227
404	0.0007407	123	166	15	209
405	0.0005856	130	166	16	202
406	0.0008833	63	134	13	205
407	0.0005913	172	195	17	218
408	0.0004717	134	169	18	204
409	0.000695	81	141	13	201
410	0.0005686	64	148	13	232
411	0.0006062	99	150	17	201
412	0.0005487	113	159	17	205
413	0.0006563	80	139	16	198
414	0.0005111	109	149	17	189
415	0.0004688	134	163	17	192
416	0.0005232	88	145	17	202
417	0.0005124	116	150	19	184
418	0.0005644	104	154	15	204
419	0.0008328	98	149	14	200
420	0.0005404	116	152	17	188
421	0.0006163	105	158	15	211
422	0.0006934	115	147	19	179
423	0.0005743	110	152	16	194
424	0.000693	79	138	16	197
425	0.0005379	134	161	18	188
426	0.0006072	102	148	14	194
427	0.0005128	146	168	19	190
428	0.0006201	128	168	17	208
429	0.0004864	122	153	17	184
430	0.000691	81	152	17	223
431	0.0006999	121	163	16	205
432	0.0005583	85	143	16	201
433	0.0004735	93	133	19	173
434	0.0006247	124	166	15	208
435	0.0005351	107	145	15	183
436	0.0007535	69	140	15	211
437	0.000549	124	164	16	204
438	0.0005153	111	155	15	199
439	0.0006034	113	146	16	179
440	0.0005062	130	170	17	210
441	0.0005584	51	130	16	209
442	0.0004698	81	131	16	181
443	0.000608	80	140	11	200
444	0.0005801	79	139	15	199
445	0.000603	69	137	17	205
446	0.0006352	65	135	13	205
447	0.000584	57	140	18	223
448	0.0007442	30	135	19	240
449	0.0005807	97	139	15	181
450	0.0005747	62	134	14	206
451	0.0004838	106	150	15	194
452	0.0006077	75	141	17	207
453	0.0006342	112	160	14	208
454	0.0006674	121	158	17	195
455	0.0005343	131	169	16	207
456	0.0006052	81	141	15	201
457	0.0005147	129	172	19	215
458	0.0007321	116	153	17	190
459	0.0005714	100	152	16	204
460	0.0008393	84	150	15	216
461	0.000427	141	157	19	173
462	0.0006343	119	158	17	197
463	0.0005763	97	146	19	195
464	0.000635	86	153	19	220
465	0.0006605	100	150	15	200
466	0.0006258	129	166	17	203
467	0.000656	81	141	16	201
468	0.0005951	146	171	17	196
469	0.0005703	101	156	17	211
470	0.0005458	101	147	17	193
471	0.0006414	80	148	17	216
472	0.0006227	104	150	15	196
473	0.0006147	98	143	16	188
474	0.0006133	93	153	16	213
475	0.0006134	132	152	19	172
476	0.0007087	109	161	19	213
477	0.0006159	90	139	14	188
478	0.0005547	133	173	18	213
479	0.0005717	125	163	17	201
480	0.0005342	118	163	18	208
481	0.0005817	115	167	18	219
482	0.0007044	111	161	15	211
483	0.0005105	143	166	19	189
484	0.0006196	140	170	16	200
485	0.0005776	113	146	15	179
486	0.0005683	59	131	13	203
487	0.0005693	118	150	15	182
488	0.0006105	83	151	19	219
489	0.0005768	84	144	18	204
490	0.0004763	142	167	16	192
491	0.0006786	99	148	19	197
492	0.0005764	45	134	13	223
493	0.0005643	95	141	16	187
494	0.000622	87	151	19	215
495	0.0006663	80	148	16	216
496	0.0004165	148	167	17	186
497	0.0006469	66	147	16	228
498	0.0005214	118	155	19	192
499	0.0004618	113	153	15	193
500	0.0007724	85	147	18	209
501	0.0006115	86	148	17	210
502	0.0006333	89	145	17	201
503	0.0005593	97	149	15	201
504	0.000596	110	141	13	172
505	0.0006903	86	152	19	218
506	0.0006008	126	166	16	206
507	0.0006737	50	139	18	228
508	0.0006227	77	144	18	211
509	0.0005147	77	137	14	197
510	0.0006216	115	143	17	171
511	0.0006614	98	158	15	218
512	0.0004263	101	134	12	167
513	0.0006691	107	149	16	191
514	0.0005511	109	152	15	195
515	0.0005858	122	152	15	182
516	0.0007402	70	145	16	220
517	0.0006431	71	142	17	213
518	0.0007021	103	159	16	215
519	0.0009556	71	153	17	235
520	0.0005286	154	189	19	224
521	0.0006239	104	153	19	202
522	0.000563	87	141	15	195
523	0.0004892	130	154	18	178
524	0.0006258	47	131	15	215
525	0.0007098	59	133	17	207
526	0.0007691	122	165	19	208
527	0.0005663	117	155	16	193
528	0.0005902	63	139	16	215
529	0.0007135	92	154	19	216
530	0.0007375	101	152	14	203
531	0.0006567	77	148	13	219
532	0.0006733	85	147	16	209
533	0.0007647	93	148	15	203
534	0.0006245	120	156	14	192
535	0.0005813	82	139	12	196
536	0.0006452	93	151	18	209
537	0.0005375	135	167	17	199
538	0.0005062	134	168	18	202
539	0.0006097	110	153	17	196
540	0.0006325	66	137	16	208
541	0.0004841	100	153	15	206
542	0.0005446	124	166	15	208
543	0.000458	135	160	19	185
544	0.0005303	117	159	19	201
545	0.0007627	127	162	15	197
546	0.0004902	126	159	15	192
547	0.0005314	107	139	19	171
548	0.0006444	82	152	19	222
549	0.0005827	98	138	18	178
550	0.0007108	91	142	14	193
551	0.0006098	96	149	15	202
552	0.0005114	62	129	13	196
553	0.0006605	76	141	16	206
554	0.0007068	104	150	17	196
555	0.000714	87	153	14	219
556	0.0005407	115	160	18	205
557	0.0006524	130	168	17	206
558	0.0006212	116	150	16	184
559	0.0007186	81	146	14	211
560	0.000843	80	140	13	200
561	0.0005882	96	150	14	204
562	0.0006368	58	132	15	206
563	0.0005739	91	151	15	211
564	0.0005721	81	142	17	203
565	0.0007344	126	167	18	208
566	0.0006078	74	148	15	222
567	0.0004533	147	166	17	185
568	0.0004688	124	168	17	212
569	0.0006707	65	121	12	177
570	0.0005411	111	151	19	191
571	0.0006465	89	157	18	225
572	0.0004386	113	157	14	201
573	0.0005141	100	141	19	182
574	0.0005237	95	141	15	187
575	0.000652	75	140	17	205
576	0.0006314	149	178	18	207
577	0.0005117	113	164	18	215
578	0.0007386	82	149	19	216
579	0.0005785	98	168	19	238
580	0.0005276	116	155	16	194
581	0.0005291	100	147	17	194
582	0.0006354	126	167	17	208
583	0.0005196	69	125	16	181
584	0.0006853	118	155	17	192
585	0.0005925	62	135	18	208
586	0.0005571	79	136	15	193
587	0.0005373	69	137	18	205
588	0.0006118	79	152	17	225
589	0.0005971	96	155	19	214
590	0.0005777	138	169	17	200
591	0.0006283	106	156	14	206
592	0.0005663	103	136	14	169
593	0.0005808	82	137	12	192
594	0.0006039	66	132	13	198
595	0.0006533	29	116	19	203
596	0.0006511	144	166	15	188
597	0.0005119	138	164	17	190
598	0.0006763	80	134	12	188
599	0.0005905	123	166	17	209
600	0.0005536	120	154	15	188
601	0.00062	114	149	17	184
602	0.0006846	82	139	12	196
603	0.0004807	144	171	19	198
604	0.0005698	74	144	19	214
605	0.0004918	121	164	18	207
606	0.0005301	100	140	18	180
607	0.0005977	86	149	18	212
608	0.0007141	39	129	18	219
609	0.000645	53	137	19	221
610	0.0006569	87	140	15	193
611	0.0005853	104	147	16	190
612	0.0005437	116	167	16	218
613	0.0005693	126	163	17	200
614	0.0006443	92	137	15	182
615	0.0005989	118	158	15	198
616	0.0005829	93	150	17	207
617	0.000669	133	170	19	207
618	0.0006576	69	139	14	209
619	0.0006513	76	140	16	204
620	0.0005984	80	138	15	196
621	0.0005291	114	160	19	206
622	0.000545	98	149	17	200
623	0.000518	106	148	16	190
624	0.0004195	124	155	15	186
625	0.0006752	111	154	17	197
626	0.0005121	134	160	18	186
627	0.0005458	116	167	17	218
628	0.0006149	90	143	13	196
629	0.0005337	132	168	16	204
630	0.0005519	131	152	14	173
631	0.0004127	138	166	17	194
632	0.0005928	80	142	18	204
633	0.0005224	106	153	16	200
634	0.0006611	87	147	15	207
635	0.0004863	110	144	13	178
636	0.0004827	117	165	19	213
637	0.0005781	108	154	14	200
638	0.0006239	90	145	15	200
639	0.000537	141	172	19	203
640	0.0005612	120	156	15	192
641	0.0005428	97	148	19	199
642	0.0005605	141	171	18	201
643	0.0006097	89	137	16	185
644	0.0005889	85	135	16	185
645	0.0006005	124	173	16	222
646	0.0005294	102	146	16	190
647	0.0004731	126	168	18	210
648	0.0005293	105	153	18	201
649	0.0005269	126	156	19	186
650	0.0006291	115	155	19	195
651	0.0006546	72	142	16	212
652	0.0004127	147	167	19	187
653	0.0004823	136	166	17	196
654	0.0007297	78	135	13	192
655	0.0006504	114	159	15	204
656	0.0005909	93	136	16	179
657	0.0005266	119	142	16	165
658	0.000492	117	156	18	195
659	0.0006276	124	166	19	208
660	0.0006435	128	157	19	186
661	0.0007241	84	148	15	212
662	0.0005513	86	138	14	190
663	0.0006998	101	162	15	223
664	0.0005751	131	164	18	197
665	0.0005382	59	129	13	199
666	0.0005703	116	162	16	208
667	0.000584	123	155	18	187
668	0.0006588	76	153	17	230
669	0.0005638	107	155	18	203
670	0.0006493	64	139	16	214
671	0.0007129	120	171	18	222
672	0.0006144	100	150	17	200
673	0.0005544	120	152	19	184
674	0.000605	97	141	13	185
675	0.00069	111	143	15	175
676	0.0005538	94	144	15	194
677	0.0006199	90	141	15	192
678	0.0006953	144	167	19	190
679	0.0006151	159	170	16	181
680	0.0007011	81	143	14	205
681	0.0006023	116	158	17	200
682	0.0004907	108	143	16	178
683	0.0006708	99	161	15	223
684	0.0006362	99	154	15	209
685	0.0004721	123	166	17	209
686	0.000442	131	161	18	191
687	0.0005516	140	181	18	222
688	0.0005463	90	140	15	190
689	0.0007197	111	161	17	211
690	0.0007583	87	145	15	203
691	0.0005163	140	181	19	222
692	0.0005939	69	144	17	219
693	0.0006147	63	142	16	221
694	0.00066	86	149	15	212
695	0.0005973	109	159	15	209
696	0.000517	101	143	14	185
697	0.00057	93	158	19	223
698	0.000535	76	138	17	200
699	0.0005148	87	136	14	185
700	0.0006522	83	136	15	189
701	0.0005996	98	159	17	220
702	0.0006448	65	130	15	195
703	0.0006678	128	167	17	206
704	0.0005036	105	144	14	183
705	0.0005384	115	162	18	209
706	0.000679	79	147	14	215
707	0.000572	101	157	15	213
708	0.0005636	111	151	18	191
709	0.0005838	75	141	16	207
710	0.0004219	98	136	14	174
711	0.00048	104	150	18	196
712	0.0005489	85	156	16	227
713	0.0006033	93	142	17	191
714	0.0006971	104	143	12	182
715	0.0005206	112	156	17	200
716	0.0006605	74	144	16	214
717	0.0005178	77	124	17	171
718	0.0006588	66	142	17	218
719	0.000588	106	145	19	184
720	0.000606	103	149	16	195
721	0.0005343	89	156	15	223
722	0.0006029	86	132	14	178
723	0.0005333	149	183	19	217
724	0.0005521	98	142	16	186
725	0.0005688	100	144	14	188
726	0.0006397	83	141	13	199
727	0.0005733	77	144	13	211
728	0.000674	86	149	17	212
729	0.0005853	100	151	18	202
730	0.000616	98	155	16	212
731	0.0005038	141	173	16	205
732	0.0005978	106	161	17	216
733	0.0007896	89	135	11	181
734	0.0006357	140	163	19	186
735	0.0004521	140	171	18	202
736	0.0006634	126	176	19	226
737	0.0006296	73	139	16	205
738	0.0006532	68	133	11	198
739	0.0006279	100	155	16	210
740	0.0005992	90	137	14	184
741	0.0005424	79	136	13	193
742	0.0006247	85	145	14	205
743	0.0007311	105	146	16	187
744	0.0005094	96	141	16	186
745	0.0007137	91	136	12	181
746	0.0004016	140	159	17	178
747	0.0005091	102	151	12	200
748	0.0005471	106	146	13	186
749	0.0005171	114	157	14	200
750	0.0005947	132	158	18	184
751	0.0005641	76	140	15	204
752	0.0005536	121	157	15	193
753	0.0005703	114	156	19	198
754	0.0006313	91	157	16	223
755	0.0005191	134	162	15	190
756	0.0006922	102	147	14	192
757	0.0005121	135	154	19	173
758	0.0005361	126	154	15	182
759	0.0006783	85	141	14	197
760	0.0006644	136	156	18	176
761	0.0004798	113	159	19	205
762	0.0005441	74	135	15	196
763	0.0005803	100	153	16	206
764	0.00053	123	168	17	213
765	0.000678	56	127	17	198
766	0.0004902	109	144	14	179
767	0.0006092	64	136	17	208
768	0.0004856	133	160	16	187
769	0.000575	116	158	15	200
770	0.0005958	113	148	16	183
771	0.0005972	120	155	15	190
772	0.0005218	99	139	13	179
773	0.0005576	113	156	16	199
774	0.0006557	72	153	16	234
775	0.0005501	111	153	15	195
776	0.0006644	81	137	14	193
777	0.0006057	78	146	14	214
778	0.0007813	119	153	17	187
779	0.000694	70	144	17	218
780	0.0006612	126	160	13	194
781	0.000648	106	160	14	214
782	0.0006029	119	155	16	191
783	0.0005563	122	153	16	184
784	0.0006233	110	154	16	198
785	0.0004701	113	146	17	179
786	0.0004828	127	162	18	197
787	0.0006488	101	165	17	229
788	0.0006914	77	142	16	207
789	0.0005584	140	173	19	206
790	0.0005528	127	159	17	191
791	0.0006565	81	136	15	191
792	0.0005795	99	148	17	197
793	0.0005677	106	148	14	190
794	0.0005947	90	142	19	194
795	0.0006251	105	155	15	205
796	0.0006069	74	134	16	194
797	0.0004997	100	145	16	190
798	0.0006802	64	138	17	212
799	0.0005006	132	170	19	208
800	0.0006085	50	126	15	202
801	0.0007209	129	160	18	191
802	0.0004629	110	139	13	168
803	0.0006083	118	165	17	212
804	0.0004068	122	147	13	172
805	0.0006251	137	161	19	185
806	0.0006335	132	167	19	202
807	0.0006446	89	151	14	213
808	0.0005637	161	179	17	197
809	0.0006897	75	146	14	217
810	0.0006153	145	180	19	215
811	0.0004804	95	136	14	177
812	0.0006855	150	180	16	210
813	0.0007245	97	151	17	205
814	0.0005334	115	162	18	209
815	0.0005754	118	172	15	226
816	0.0004535	129	156	16	183
817	0.0007006	98	152	17	206
818	0.0007059	59	144	17	229
819	0.0005821	76	134	15	192
820	0.0006567	58	131	18	204
821	0.0007128	144	177	17	210
822	0.0005229	127	166	17	205
823	0.0006528	98	146	15	194
824	0.000711	82	132	14	182
825	0.0007031	86	150	18	214
826	0.0005693	110	153	19	196
827	0.0006089	70	142	19	214
828	0.0006193	76	137	14	198
829	0.000688	65	142	17	219
830	0.0005127	127	161	19	195
831	0.0005495	129	153	13	177
832	0.0005453	128	170	13	212
833	0.0006316	110	149	15	188
834	0.0006141	81	154	18	227
835	0.0006426	88	150	14	212
836	0.0006388	71	142	14	213
837	0.0005472	107	150	18	193
838	0.0006476	115	145	16	175
839	0.0004699	126	154	16	182
840	0.0006876	64	137	17	210
841	0.0006081	89	145	15	201
842	0.0005584	73	142	15	211
843	0.0005331	123	164	17	205
844	0.0004667	133	161	13	189
845	0.000522	96	137	15	178
846	0.0004656	106	149	17	192
847	0.0005638	128	170	16	212
848	0.0007155	67	134	16	201
849	0.0004553	114	145	16	176
850	0.0005352	112	161	17	210
851	0.0006525	55	136	18	217
852	0.00057	118	159	17	200
853	0.0005675	104	160	18	216
854	0.0005569	119	159	16	199
855	0.0006077	94	149	17	204
856	0.0005874	74	136	12	198
857	0.0005872	114	165	18	216
858	0.0007001	94	148	16	202
859	0.0006649	69	143	19	217
860	0.0007019	94	156	16	218
861	0.0007565	70	126	14	182
862	0.000566	108	150	13	192
863	0.0006573	78	140	12	202
864	0.0005917	96	144	17	192
865	0.0006286	52	136	18	220
866	0.0007533	39	130	17	221
867	0.0005565	95	145	18	195
868	0.0006803	80	139	16	198
869	0.0006896	128	159	14	190
870	0.0005639	117	153	16	189
871	0.0006684	88	149	16	210
872	0.000509	116	160	19	204
873	0.0006087	102	161	19	220
874	0.0005815	89	144	12	199
875	0.0006665	125	160	17	195
876	0.0006421	119	150	14	181
877	0.0006257	65	140	14	215
878	0.0006242	104	157	19	210
879	0.0006945	69	144	17	219
880	0.0006307	112	160	17	208
881	0.0005458	166	192	18	218
882	0.0005249	115	153	19	191
883	0.0006719	143	169	15	195
884	0.0006546	97	156	16	215
885	0.0005946	90	152	18	214
886	0.0005948	97	145	19	193
887	0.0005718	109	163	17	217
888	0.0005203	170	189	19	208
889	0.0006302	94	156	18	218
890	0.0005908	123	164	15	205
891	0.0005534	100	146	14	192
892	0.000511	119	164	16	209
893	0.0005988	140	182	17	224
894	0.0005081	133	164	18	195
895	0.0006388	74	143	15	212
896	0.0005549	100	153	16	206
897	0.0006112	64	134	14	204
898	0.0005583	151	175	19	199
899	0.0004969	118	153	15	188
900	0.000485	125	161	19	197
901	0.0005409	109	146	16	183
902	0.0004752	130	164	19	198
903	0.0006112	84	152	14	220
904	0.0005546	114	159	19	204
905	0.0006073	93	148	16	203
906	0.0005112	124	165	17	206
907	0.0006484	72	141	14	210
908	0.0006192	82	145	13	208
909	0.0005472	124	159	18	194
910	0.0005132	115	142	17	169
911	0.0006371	135	163	15	191
912	0.0004638	160	191	19	222
913	0.0006681	79	144	15	209
914	0.000597	126	154	17	182
915	0.0005545	107	150	18	193
916	0.0005516	113	161	16	209
917	0.000564	79	144	17	209
918	0.0005745	104	148	14	192
919	0.0005941	98	148	13	198
920	0.0008153	137	165	18	193
921	0.0005608	118	153	18	188
922	0.0005439	110	155	15	200
923	0.0006448	99	163	17	227
924	0.0008518	60	135	14	210
925	0.0008576	101	164	16	227
926	0.0006673	112	151	17	190
927	0.0005805	105	158	19	211
928	0.0005819	131	166	19	201
929	0.0005893	100	153	16	206
930	0.0006129	134	168	19	202
931	0.0006264	143	170	16	197
932	0.0005402	127	158	16	189
933	0.0004923	87	137	11	187
934	0.0005592	95	146	16	197
935	0.0006229	79	146	19	213
936	0.0007468	53	141	19	229
937	0.000509	119	155	19	191
938	0.0006849	114	155	18	196
939	0.0005657	95	150	18	205
940	0.0004796	127	164	16	201
941	0.0005914	108	154	14	200
942	0.0005111	86	150	19	214
943	0.0005922	130	167	19	204
944	0.0007473	81	153	18	225
945	0.0005339	97	141	14	185
946	0.0006397	113	159	16	205
947	0.0005137	115	153	17	191
948	0.0006001	58	128	19	198
949	0.0005141	118	152	17	186
950	0.0006311	80	139	14	198
951	0.0006696	71	130	17	189
952	0.0004188	138	160	17	182
953	0.0005607	114	152	18	190
954	0.0005182	100	149	15	198
955	0.0006848	74	140	15	206
956	0.0005126	118	157	15	196
957	0.0005158	113	152	17	191
958	0.0008102	105	171	17	237
959	0.0007074	71	154	16	237
960	0.0005114	126	164	16	202
961	0.0006532	90	158	19	226
962	0.0006018	86	149	13	212
963	0.0005698	98	139	16	180
964	0.0005322	113	163	15	213
965	0.0006715	107	152	17	197
966	0.0006148	83	154	14	225
967	0.0005951	102	158	15	214
968	0.0006634	89	145	17	201
969	0.0005744	76	140	15	204
970	0.000658	85	154	14	223
971	0.0005742	110	149	18	188
972	0.0005392	64	132	15	200
973	0.0005844	119	156	17	193
974	0.0006103	116	167	16	218
975	0.000696	70	150	17	230
976	0.0006628	53	135	16	217
977	0.0006607	77	139	14	201
978	0.0005223	112	159	15	206
979	0.0005339	88	142	17	196
980	0.0005729	120	165	16	210
981	0.0004947	101	152	14	203
982	0.0005241	119	160	12	201
983	0.0005203	100	154	14	208
984	0.0005512	116	156	13	196
985	0.0006213	74	136	18	198
986	0.0005953	109	158	14	207
987	0.0005382	91	135	15	179
988	0.0006003	135	169	18	203
989	0.000547	68	135	16	202
990	0.0007387	52	142	19	232
991	0.0005985	111	146	15	181
992	0.0006137	106	154	14	202
993	0.0006479	94	148	16	202
994	0.0005867	68	133	14	198
995	0.0005594	120	153	16	186
996	0.0006328	90	145	16	200
997	0.0005993	93	150	19	207
998	0.0006935	68	152	15	236
999	0.0005326	133	160	18	187
mean	0.000601534	101.747	151.336	16.183	200.925

## Sheet: PowerBalance_SEq
	time	SEq	Bal	Reg	Egal
0	0.0008974	49	133	16	217
1	0.0004803	75	143	16	211
2	0.00051	40	135	15	230
3	0.0004745	95	138	14	181
4	0.0004967	89	153	13	217
5	0.0003947	61	136	17	211
6	0.0004656	56	126	17	196
7	0.0005178	104	146	15	188
8	0.0004651	47	131	18	215
9	0.0004709	85	139	12	193
10	0.0004897	76	148	18	220
11	0.0004937	73	137	15	201
12	0.0005245	24	136	16	248
13	0.0004962	53	134	18	215
14	0.0005626	57	139	17	221
15	0.0004878	50	132	17	214
16	0.0005153	59	142	17	225
17	0.0004877	108	153	14	198
18	0.0005445	28	134	19	240
19	0.0004813	86	144	14	202
20	0.0004627	55	134	17	213
21	0.0005142	68	136	14	204
22	0.0005129	59	138	12	217
23	0.0005096	68	145	15	222
24	0.0005828	102	148	14	194
25	0.000501	65	136	13	207
26	0.0005038	54	140	16	226
27	0.000483	76	137	16	198
28	0.0004661	90	147	17	204
29	0.0004898	120	159	14	198
30	0.0004813	66	146	14	226
31	0.0004772	23	125	15	227
32	0.0005041	108	161	18	214
33	0.0005046	82	144	17	206
34	0.0004867	65	138	17	211
35	0.0004733	98	153	16	208
36	0.0004922	61	143	15	225
37	0.0005291	67	137	11	207
38	0.0004867	91	157	19	223
39	0.0004848	8	136	18	264
40	0.0005227	52	138	16	224
41	0.0004835	52	125	17	198
42	0.0003712	37	130	15	223
43	0.0004674	53	143	17	233
44	0.0004631	23	127	17	231
45	0.0004893	80	141	14	202
46	0.0005181	99	139	14	179
47	0.0004949	68	143	14	218
48	0.0005239	72	138	14	204
49	0.0004585	62	135	14	208
50	0.0005186	67	140	16	213
51	0.0004802	69	132	14	195
52	0.0004665	77	137	19	197
53	0.0003982	51	140	19	229
54	0.0004674	76	144	14	212
55	0.0005027	108	156	16	204
56	0.000672	40	129	19	218
57	0.0005586	103	148	14	193
58	0.0004833	34	135	16	236
59	0.0003875	76	145	14	214
60	0.0004936	79	144	18	209
61	0.0005258	107	149	13	191
62	0.0004889	92	151	17	210
63	0.0005094	58	131	15	204
64	0.0003757	37	133	18	229
65	0.0004745	99	152	16	205
66	0.0005052	51	126	17	201
67	0.0005038	90	143	13	196
68	0.0005082	65	147	18	229
69	0.0004863	119	159	18	199
70	0.000571	94	139	16	184
71	0.0004933	122	151	16	180
72	0.0004587	38	136	18	234
73	0.0004564	92	142	16	192
74	0.0003509	25	123	19	221
75	0.0004892	95	130	14	165
76	0.0004727	106	143	14	180
77	0.0004844	69	148	19	227
78	0.0005719	93	143	15	193
79	0.0004728	69	137	16	205
80	0.000479	69	154	18	239
81	0.0004899	69	141	17	213
82	0.0004897	79	141	17	203
83	0.0004707	32	128	19	224
84	0.0004587	59	141	15	223
85	0.0004493	64	132	17	200
86	0.0005298	92	152	14	212
87	0.0004985	118	153	16	188
88	0.0004944	84	148	15	212
89	0.000481	25	140	18	255
90	0.0004784	95	149	14	203
91	0.0004774	97	149	19	201
92	0.0004929	80	134	19	188
93	0.0004864	20	133	19	246
94	0.0004726	74	144	18	214
95	0.0005321	100	154	14	208
96	0.0004528	62	141	15	220
97	0.0004689	66	143	17	220
98	0.0004836	104	150	17	196
99	0.0004725	45	134	14	223
100	0.0005043	59	136	18	213
101	0.0005086	88	145	14	202
102	0.0004636	41	126	17	211
103	0.0004804	55	135	14	215
104	0.0005461	84	151	19	218
105	0.0004836	81	167	19	253
106	0.0004748	83	135	14	187
107	0.0003752	46	121	15	196
108	0.0004865	83	145	18	207
109	0.0005202	54	137	14	220
110	0.0004787	69	133	16	197
111	0.0004576	77	135	13	193
112	0.0004619	52	140	13	228
113	0.0004708	41	130	19	219
114	0.0004934	95	135	15	175
115	0.0004822	38	129	15	220
116	0.0003618	49	121	15	193
117	0.0004208	39	125	11	211
118	0.0004776	61	131	14	201
119	0.0006776	45	141	17	237
120	0.0004702	58	134	14	210
121	0.0005429	69	141	16	213
122	0.0005041	95	155	17	215
123	0.0004694	62	137	15	212
124	0.0004689	60	121	12	182
125	0.0005366	39	135	19	231
126	0.0004839	60	140	15	220
127	0.000492	43	138	17	233
128	0.0004703	37	129	18	221
129	0.0004891	114	158	17	202
130	0.0004692	87	142	17	197
131	0.0004674	75	144	16	213
132	0.0005025	75	143	18	211
133	0.0003565	41	124	15	207
134	0.0003689	54	131	14	208
135	0.0004939	87	148	13	209
136	0.0004871	53	143	18	233
137	0.0005557	96	146	18	196
138	0.0004895	122	161	13	200
139	0.0004662	93	139	18	185
140	0.0005313	117	162	14	207
141	0.0004928	67	136	18	205
142	0.000506	112	162	17	212
143	0.0004936	11	134	19	257
144	0.0004754	97	140	16	183
145	0.0005224	53	140	16	227
146	0.0005693	75	141	17	207
147	0.0004975	77	135	17	193
148	0.0004589	83	147	17	211
149	0.0004692	42	138	18	234
150	0.000517	111	158	13	205
151	0.0004901	90	150	18	210
152	0.0004934	123	165	14	207
153	0.0003663	86	147	17	208
154	0.0005427	85	155	17	225
155	0.0004799	49	123	13	197
156	0.0004089	50	115	15	180
157	0.0005171	129	164	18	199
158	0.0004782	95	144	18	193
159	0.0005327	129	176	19	223
160	0.000456	47	134	18	221
161	0.0004869	62	147	17	232
162	0.0004729	69	134	15	199
163	0.0004992	92	151	17	210
164	0.0004969	42	128	16	214
165	0.0004974	105	157	17	209
166	0.0004774	66	127	15	188
167	0.0004845	42	136	18	230
168	0.0004941	78	145	15	212
169	0.0004876	116	164	19	212
170	0.0004834	67	143	16	219
171	0.0005285	119	160	19	201
172	0.0005086	82	135	19	188
173	0.000473	47	127	17	207
174	0.00035	38	124	16	210
175	0.0004712	54	139	16	224
176	0.0004911	54	138	19	222
177	0.0004626	71	134	16	197
178	0.0005077	73	132	15	191
179	0.0004863	98	147	16	196
180	0.0005193	80	145	18	210
181	0.0004748	99	148	17	197
182	0.0005106	41	146	17	251
183	0.000511	102	147	15	192
184	0.0005075	108	151	16	194
185	0.0005295	119	157	19	195
186	0.000513	47	141	18	235
187	0.0004677	86	139	12	192
188	0.0005292	65	144	13	223
189	0.0004666	88	144	18	200
190	0.0005078	98	148	13	198
191	0.0004725	54	136	19	218
192	0.000477	93	149	16	205
193	0.0004741	43	138	17	233
194	0.0004707	80	137	16	194
195	0.0004703	61	133	19	205
196	0.0004932	70	141	14	212
197	0.0004589	69	137	16	205
198	0.0005018	65	149	18	233
199	0.0005205	76	131	15	186
200	0.0004688	74	142	15	210
201	0.0004773	53	127	18	201
202	0.000489	87	143	17	199
203	0.0004643	81	154	18	227
204	0.0005571	55	131	16	207
205	0.000516	38	129	17	220
206	0.0003773	48	133	19	218
207	0.0005214	74	144	17	214
208	0.0004595	49	133	14	217
209	0.0004938	29	133	19	237
210	0.0003696	57	119	16	181
211	0.0004813	72	151	19	230
212	0.0004963	55	140	18	225
213	0.0005016	88	144	15	200
214	0.0004998	67	140	17	213
215	0.0004657	105	149	14	193
216	0.0003727	47	128	18	209
217	0.0004838	52	128	18	204
218	0.0004761	47	132	17	217
219	0.0004575	72	133	16	194
220	0.0005009	113	154	16	195
221	0.0005416	91	143	15	195
222	0.0003548	33	133	19	233
223	0.0005185	81	140	16	199
224	0.0004773	112	146	12	180
225	0.0005859	64	132	15	200
226	0.000511	113	145	14	177
227	0.0004821	80	148	14	216
228	0.0004942	115	147	14	179
229	0.0005076	105	152	17	199
230	0.0005083	77	139	18	201
231	0.0004633	36	122	16	208
232	0.0003844	71	140	19	209
233	0.0005169	62	151	17	240
234	0.0004662	84	133	11	182
235	0.0004816	102	154	18	206
236	0.0004975	96	155	13	214
237	0.0005897	68	143	16	218
238	0.0004653	67	133	18	199
239	0.0004658	78	149	13	220
240	0.0004812	70	147	15	224
241	0.0005531	87	149	18	211
242	0.0005095	78	155	15	232
243	0.0005292	100	153	14	206
244	0.0004786	86	144	17	202
245	0.0004992	52	140	18	228
246	0.0004927	85	142	19	199
247	0.000574	97	155	17	213
248	0.0004448	38	124	16	210
249	0.0003565	34	129	18	224
250	0.0004513	77	133	16	189
251	0.0003654	49	132	19	215
252	0.0005612	54	136	12	218
253	0.000526	56	140	19	224
254	0.0004878	102	142	14	182
255	0.0004841	59	139	18	219
256	0.0006093	69	142	15	215
257	0.0004622	76	147	15	218
258	0.0004533	92	140	19	188
259	0.0004719	83	144	18	205
260	0.0005011	81	143	16	205
261	0.0005015	77	141	13	205
262	0.0004743	26	135	16	244
263	0.0004664	74	140	16	206
264	0.0005552	9	129	19	249
265	0.0005134	74	139	17	204
266	0.0004933	50	127	19	204
267	0.0003506	43	124	15	205
268	0.0004858	63	137	16	211
269	0.0004996	50	131	15	212
270	0.0005286	127	154	16	181
271	0.0003653	70	130	17	190
272	0.0004931	17	134	17	251
273	0.0004803	69	134	18	199
274	0.0005112	56	141	19	226
275	0.000635	78	135	15	192
276	0.0005127	100	154	16	208
277	0.0005474	44	143	19	242
278	0.0004695	48	139	18	230
279	0.0005011	103	151	19	199
280	0.0004719	47	141	19	235
281	0.0004741	73	141	15	209
282	0.0004817	51	140	15	229
283	0.0004737	33	129	16	225
284	0.0005091	97	145	17	193
285	0.0003591	47	122	12	197
286	0.0004988	112	161	18	210
287	0.0004991	71	145	16	219
288	0.0004758	54	137	18	220
289	0.0005338	52	135	16	218
290	0.0004907	52	141	18	230
291	0.0004953	81	143	14	205
292	0.000535	73	142	19	211
293	0.0004964	70	151	19	232
294	0.0004124	38	134	15	230
295	0.0005081	51	141	16	231
296	0.0004651	96	134	13	172
297	0.000462	89	134	13	179
298	0.0004697	79	135	13	191
299	0.0005084	87	166	17	245
300	0.0004719	64	133	12	202
301	0.0004756	55	135	16	215
302	0.0004927	59	139	13	219
303	0.0004698	61	134	14	207
304	0.0005042	95	139	12	183
305	0.0004824	82	152	17	222
306	0.0004742	105	144	16	183
307	0.0005652	75	142	16	209
308	0.0004965	103	155	13	207
309	0.0005417	87	141	15	195
310	0.0005765	79	160	18	241
311	0.0003681	21	136	18	251
312	0.0003759	76	133	14	190
313	0.0005513	83	149	14	215
314	0.000472	106	146	18	186
315	0.000523	85	141	19	197
316	0.000379	69	128	14	187
317	0.000526	40	124	17	208
318	0.0005264	106	153	13	200
319	0.0004656	61	141	18	221
320	0.0004646	117	154	13	191
321	0.0004666	96	152	19	208
322	0.0004837	19	123	19	227
323	0.0004754	82	151	14	220
324	0.0003775	51	126	16	201
325	0.0003801	20	127	18	234
326	0.0004742	65	138	16	211
327	0.0005653	58	147	17	236
328	0.0004728	43	123	16	203
329	0.0005127	113	162	18	211
330	0.0004779	53	129	15	205
331	0.0005114	114	157	17	200
332	0.0004697	60	137	16	214
333	0.0004739	98	142	13	186
334	0.0005227	121	162	17	203
335	0.0005419	79	146	16	213
336	0.0004984	56	138	16	220
337	0.0006808	98	152	15	206
338	0.0005267	88	146	13	204
339	0.0004981	74	141	19	208
340	0.0004829	86	142	13	198
341	0.0004867	116	146	17	176
342	0.0004311	61	136	13	211
343	0.0003746	59	125	18	191
344	0.0004555	41	132	18	223
345	0.0005667	58	137	15	216
346	0.0005338	71	139	16	207
347	0.0004779	22	142	19	262
348	0.0004652	82	136	12	190
349	0.0005206	121	158	14	195
350	0.0005228	70	146	19	222
351	0.0004978	97	148	12	199
352	0.0004884	60	141	17	222
353	0.0004982	10	139	18	268
354	0.0004634	69	136	17	203
355	0.0004556	65	139	19	213
356	0.0004933	86	138	18	190
357	0.0004805	107	151	16	195
358	0.0004712	87	141	15	195
359	0.0003594	39	122	15	205
360	0.0004652	30	129	18	228
361	0.0004961	82	146	13	210
362	0.000519	160	176	19	192
363	0.0005273	55	143	19	231
364	0.0005878	71	143	17	215
365	0.0004929	89	148	15	207
366	0.0003532	39	130	17	221
367	0.0004865	56	130	18	204
368	0.0005016	71	146	16	221
369	0.0004979	41	129	17	217
370	0.0004851	106	147	15	188
371	0.0004987	87	153	14	219
372	0.000468	78	140	16	202
373	0.0005004	68	148	19	228
374	0.0004779	83	144	15	205
375	0.0003701	70	141	18	212
376	0.0004677	44	135	18	226
377	0.000523	79	148	16	217
378	0.0004887	78	141	17	204
379	0.0004749	93	149	14	205
380	0.0004856	56	134	19	212
381	0.0004621	51	133	16	215
382	0.0004854	107	144	18	181
383	0.0004948	73	139	14	205
384	0.0004742	62	140	17	218
385	0.0005693	63	140	19	217
386	0.0004924	112	157	19	202
387	0.0004591	60	128	16	196
388	0.0004641	49	130	14	211
389	0.0004905	57	141	18	225
390	0.0004957	51	129	18	207
391	0.000483	74	137	12	200
392	0.0004921	76	140	18	204
393	0.0003652	43	118	18	193
394	0.0004916	77	146	13	215
395	0.0004804	43	135	18	227
396	0.0004966	103	157	16	211
397	0.0004778	71	148	17	225
398	0.0004663	102	152	18	202
399	0.0004996	107	151	18	195
400	0.0005006	59	137	17	215
401	0.0004767	85	153	15	221
402	0.0005002	56	129	17	202
403	0.0004834	26	139	18	252
404	0.0005324	46	141	19	236
405	0.0004791	45	137	15	229
406	0.000472	47	131	13	215
407	0.0004682	86	156	17	226
408	0.0005342	89	151	14	213
409	0.0004609	81	141	13	201
410	0.0004952	64	148	13	232
411	0.0004792	48	134	19	220
412	0.0004515	82	147	18	212
413	0.000508	80	139	16	198
414	0.0004952	69	132	17	195
415	0.0005317	134	163	17	192
416	0.0004556	74	140	17	206
417	0.0003613	35	122	19	209
418	0.0004695	31	133	17	235
419	0.0005232	98	149	14	200
420	0.0004838	101	146	15	191
421	0.0005411	83	151	17	219
422	0.0004848	34	125	18	216
423	0.0004964	39	128	16	217
424	0.0005038	79	138	16	197
425	0.000508	97	141	14	185
426	0.000483	78	139	14	200
427	0.0004922	63	130	14	197
428	0.0004803	55	151	17	247
429	0.0004761	122	153	17	184
430	0.0004774	67	148	17	229
431	0.0005163	83	154	19	225
432	0.0004547	85	143	16	201
433	0.0004608	36	112	17	188
434	0.0006014	113	161	15	209
435	0.0004822	68	129	17	190
436	0.0004752	45	130	16	215
437	0.0005015	124	164	16	204
438	0.0005484	70	138	15	206
439	0.0005001	49	128	16	207
440	0.0005008	74	147	15	220
441	0.0004744	9	117	16	225
442	0.0004587	81	131	16	181
443	0.0004719	67	138	13	209
444	0.0004548	79	139	15	199
445	0.000463	69	137	17	205
446	0.0005049	23	126	19	229
447	0.0004807	53	138	18	223
448	0.0004669	30	135	19	240
449	0.0004934	66	132	16	198
450	0.0003678	52	130	15	208
451	0.0004715	79	142	13	205
452	0.0004673	75	141	17	207
453	0.0004828	90	152	17	214
454	0.0004987	73	134	14	195
455	0.0003996	51	138	17	225
456	0.0004579	81	141	15	201
457	0.0004764	51	130	18	209
458	0.0005039	58	139	19	220
459	0.0004781	83	142	14	201
460	0.0004986	28	136	18	244
461	0.0004591	73	132	19	191
462	0.0004949	77	144	17	211
463	0.0005098	97	146	19	195
464	0.0004595	86	153	19	220
465	0.0004847	100	150	15	200
466	0.0005462	47	137	18	227
467	0.0004965	81	141	16	201
468	0.0004605	56	141	19	226
469	0.0004776	60	141	17	222
470	0.0004886	101	147	17	193
471	0.0004941	80	148	17	216
472	0.0004817	104	150	15	196
473	0.0005495	98	143	16	188
474	0.0004905	93	153	16	213
475	0.0004817	114	150	19	186
476	0.0004898	24	131	16	238
477	0.0005741	90	139	14	188
478	0.0004857	95	149	17	203
479	0.0005287	98	149	16	200
480	0.0005071	59	135	13	211
481	0.0004627	74	149	17	224
482	0.0005083	111	161	15	211
483	0.0004703	22	124	18	226
484	0.0004785	37	139	15	241
485	0.0004516	82	134	15	186
486	0.0004936	59	131	13	203
487	0.0004737	75	139	18	203
488	0.0004836	35	133	19	231
489	0.0006086	84	144	18	204
490	0.0005643	72	144	15	216
491	0.0005196	86	139	15	192
492	0.0004829	20	131	18	242
493	0.0004692	95	141	16	187
494	0.000508	87	151	19	215
495	0.0005382	80	148	16	216
496	0.000467	53	134	16	215
497	0.0004922	20	138	19	256
498	0.0004693	118	155	19	192
499	0.0005084	51	137	17	223
500	0.0004707	26	125	18	224
501	0.0004794	54	134	16	214
502	0.0004744	66	138	17	210
503	0.0005071	67	142	19	217
504	0.0004929	92	135	12	178
505	0.0004977	75	145	19	215
506	0.0004866	95	155	19	215
507	0.0003819	41	135	18	229
508	0.0005247	64	139	15	214
509	0.0004802	36	124	17	212
510	0.0005198	115	143	17	171
511	0.0005049	77	149	15	221
512	0.0003538	29	116	14	203
513	0.0004651	97	144	14	191
514	0.0004859	90	146	14	202
515	0.0004777	122	152	15	182
516	0.0005046	26	131	17	236
517	0.0005187	13	132	19	251
518	0.0005761	20	137	19	254
519	0.0004972	71	153	17	235
520	0.0004757	54	145	14	236
521	0.000507	104	153	19	202
522	0.0004766	87	141	15	195
523	0.0004802	97	140	18	183
524	0.0004581	47	131	15	215
525	0.0004823	33	124	17	215
526	0.0004814	62	144	18	226
527	0.0005049	117	155	16	193
528	0.0003796	35	127	16	219
529	0.0004973	92	154	19	216
530	0.0004801	77	142	14	207
531	0.0005129	77	148	13	219
532	0.0005622	52	141	17	230
533	0.0004834	71	142	15	213
534	0.0004898	85	143	17	201
535	0.0005313	82	139	12	196
536	0.0005089	93	151	18	209
537	0.0004846	50	133	17	216
538	0.0003643	25	124	17	223
539	0.0005113	56	132	15	208
540	0.0004788	66	137	16	208
541	0.000509	87	148	15	209
542	0.0004913	86	144	19	202
543	0.0007558	62	132	12	202
544	0.0004888	76	134	19	192
545	0.0005456	114	157	15	200
546	0.0003726	60	134	18	208
547	0.0004738	63	124	15	185
548	0.0003687	49	139	16	229
549	0.0006565	74	128	16	182
550	0.0004864	91	142	14	193
551	0.0004838	52	136	15	220
552	0.0004982	43	123	17	203
553	0.0004894	52	137	19	222
554	0.0005122	104	150	17	196
555	0.0004797	50	142	17	234
556	0.0005685	104	155	14	206
557	0.0004949	82	147	17	212
558	0.000511	116	150	16	184
559	0.0005469	61	138	18	215
560	0.0004804	56	131	14	206
561	0.0004929	78	146	19	214
562	0.0005125	58	132	15	206
563	0.0004811	91	151	15	211
564	0.0005846	81	142	17	203
565	0.0004983	76	150	17	224
566	0.0005155	39	141	15	243
567	0.0004742	90	143	15	196
568	0.0003759	33	137	15	241
569	0.000358	65	121	12	177
570	0.0005187	91	148	18	205
571	0.0005083	74	153	18	232
572	0.0005148	95	152	14	209
573	0.0004493	62	125	15	188
574	0.0003583	57	125	13	193
575	0.0004798	75	140	17	205
576	0.0004849	92	148	14	204
577	0.0004964	86	150	13	214
578	0.0005022	82	149	19	216
579	0.0004772	20	140	19	260
580	0.0005843	102	150	16	198
581	0.0003693	40	128	17	216
582	0.0004983	85	153	14	221
583	0.0003768	46	121	16	196
584	0.0004739	45	134	18	223
585	0.0004986	62	135	18	208
586	0.0004739	79	136	15	193
587	0.0004861	41	125	16	209
588	0.0004872	65	145	16	225
589	0.0004812	50	145	19	240
590	0.0005079	114	161	17	208
591	0.0004874	89	150	14	211
592	0.0005047	74	127	14	180
593	0.0005231	65	134	19	203
594	0.0004763	52	127	13	202
595	0.0004731	29	116	19	203
596	0.0004637	85	146	13	207
597	0.0005121	84	150	19	216
598	0.0005325	80	134	12	188
599	0.0005099	90	154	17	218
600	0.0005234	77	142	16	207
601	0.0004622	70	139	15	208
602	0.0003669	82	139	12	196
603	0.0004939	110	155	19	200
604	0.0004881	64	142	18	220
605	0.0004895	78	144	18	210
606	0.0004784	100	140	18	180
607	0.0005121	44	135	19	226
608	0.0004726	39	129	18	219
609	0.0004781	53	137	19	221
610	0.0004694	87	140	15	193
611	0.0005287	104	147	16	190
612	0.0004922	52	148	16	244
613	0.0004839	72	143	13	214
614	0.0004884	92	137	15	182
615	0.0005901	25	139	19	253
616	0.0005029	72	137	13	202
617	0.0005027	111	157	17	203
618	0.0004866	69	139	14	209
619	0.0003663	52	133	18	214
620	0.0004966	80	138	15	196
621	0.0004749	99	155	18	211
622	0.0005205	54	135	16	216
623	0.0004678	81	138	13	195
624	0.0005103	77	138	18	199
625	0.000521	111	154	17	197
626	0.0004958	76	142	15	208
627	0.0005299	65	146	19	227
628	0.0005115	69	139	16	209
629	0.0005045	39	140	16	241
630	0.000479	131	152	14	173
631	0.0005096	97	144	17	191
632	0.0004924	71	139	18	207
633	0.000465	54	135	16	216
634	0.0004646	87	147	15	207
635	0.0004963	110	144	13	178
636	0.0004876	62	138	16	214
637	0.0005542	36	138	18	240
638	0.0004746	65	134	14	203
639	0.000489	66	140	15	214
640	0.0004823	55	136	15	217
641	0.0004971	24	131	19	238
642	0.0005128	109	157	13	205
643	0.0004957	89	137	16	185
644	0.0006797	57	125	15	193
645	0.0005302	85	152	12	219
646	0.0004878	102	146	16	190
647	0.0005108	67	141	13	215
648	0.0004577	52	131	16	210
649	0.0004992	66	132	19	198
650	0.0003583	20	118	19	216
651	0.0003687	72	142	16	212
652	0.0004776	110	143	17	176
653	0.0005067	84	142	13	200
654	0.0005923	78	135	13	192
655	0.0004905	80	151	15	222
656	0.0005027	35	121	18	207
657	0.0003837	72	118	17	164
658	0.0004776	91	140	13	189
659	0.0005024	99	156	16	213
660	0.0004729	109	152	19	195
661	0.0004758	50	135	15	220
662	0.0004901	81	135	15	189
663	0.0005027	19	133	17	247
664	0.0004953	131	164	18	197
665	0.0004416	59	129	13	199
666	0.0004863	105	158	16	211
667	0.0004732	84	145	19	206
668	0.0004757	63	146	17	229
669	0.0005402	107	155	18	203
670	0.0005463	64	139	16	214
671	0.0004964	51	147	17	243
672	0.0005247	75	138	19	201
673	0.0004992	101	143	17	185
674	0.0004601	97	141	13	185
675	0.0004723	26	122	14	218
676	0.0005194	94	144	15	194
677	0.0005007	58	128	16	198
678	0.0004684	39	125	16	211
679	0.0005112	107	152	15	197
680	0.0004917	81	143	14	205
681	0.000562	73	149	17	225
682	0.0004919	67	135	19	203
683	0.0005417	78	155	15	232
684	0.0004974	53	136	18	219
685	0.0003711	39	128	18	217
686	0.0004983	51	124	13	197
687	0.0005106	92	163	16	234
688	0.0004727	57	125	14	193
689	0.0004876	20	138	19	256
690	0.0003658	44	124	16	204
691	0.0005011	61	144	13	227
692	0.000482	32	127	17	222
693	0.0004822	63	142	16	221
694	0.000517	67	140	14	213
695	0.00047	74	141	17	208
696	0.0004716	101	143	14	185
697	0.000455	43	130	13	217
698	0.0004799	8	121	17	234
699	0.0004937	87	136	14	185
700	0.0004823	83	136	15	189
701	0.0004883	98	159	17	220
702	0.0005426	28	117	17	206
703	0.0004691	91	149	17	207
704	0.0005102	105	144	14	183
705	0.0004746	73	145	17	217
706	0.0004907	79	147	14	215
707	0.0005109	101	157	15	213
708	0.0004701	84	141	18	198
709	0.000487	42	132	13	222
710	0.0004657	80	134	16	188
711	0.000479	104	150	18	196
712	0.0005588	64	150	14	236
713	0.0004633	93	142	17	191
714	0.0005118	80	138	16	196
715	0.0005192	36	124	15	212
716	0.0004732	74	144	16	214
717	0.0004652	67	122	17	177
718	0.000528	55	134	19	213
719	0.0004589	106	145	19	184
720	0.0004548	89	144	13	199
721	0.0005006	89	156	15	223
722	0.000466	86	132	14	178
723	0.000487	74	147	16	220
724	0.0004623	98	142	16	186
725	0.0004817	100	144	14	188
726	0.0004615	83	141	13	199
727	0.0004807	77	144	13	211
728	0.0005218	86	149	17	212
729	0.0004706	56	126	14	196
730	0.0004911	85	151	16	217
731	0.0004871	76	147	14	218
732	0.000462	65	145	16	225
733	0.0004931	89	135	11	181
734	0.0005027	106	155	18	204
735	0.0004717	118	154	18	190
736	0.0004939	75	150	18	225
737	0.0004888	73	139	16	205
738	0.0004498	68	133	11	198
739	0.0005142	100	155	16	210
740	0.0004711	90	137	14	184
741	0.0004828	51	125	12	199
742	0.0004745	85	145	14	205
743	0.0004645	69	141	19	213
744	0.0003914	79	133	13	187
745	0.0006299	55	130	16	205
746	0.0005017	69	134	19	199
747	0.0005372	102	151	12	200
748	0.0004875	106	146	13	186
749	0.0004879	48	141	17	234
750	0.0004959	49	136	18	223
751	0.0005213	66	135	14	204
752	0.0004777	121	157	15	193
753	0.0004807	37	128	15	219
754	0.0004858	91	157	16	223
755	0.000494	103	152	15	201
756	0.0004899	102	147	14	192
757	0.000359	67	124	16	181
758	0.0005463	82	135	14	188
759	0.0003622	33	125	17	217
760	0.0004651	102	143	16	184
761	0.0004686	25	123	18	221
762	0.0004669	74	135	15	196
763	0.0004976	67	141	18	215
764	0.0004971	59	137	18	215
765	0.0003532	56	127	17	198
766	0.0004504	109	144	14	179
767	0.0005395	64	136	17	208
768	0.000532	113	152	14	191
769	0.0004674	24	126	18	228
770	0.000476	62	133	16	204
771	0.000513	67	143	16	219
772	0.000462	66	129	15	192
773	0.0005283	83	142	15	201
774	0.0004823	31	139	18	247
775	0.0006211	111	153	15	195
776	0.0004699	32	125	18	218
777	0.0005194	78	146	14	214
778	0.0005224	119	153	17	187
779	0.0005011	16	128	19	240
780	0.0004641	43	143	19	243
781	0.0004901	55	149	16	243
782	0.0004898	102	149	14	196
783	0.0004901	39	131	18	223
784	0.0004787	69	141	19	213
785	0.0004812	89	134	14	179
786	0.0004697	24	131	16	238
787	0.0005098	101	165	17	229
788	0.0004845	62	134	17	206
789	0.0004892	3	130	18	257
790	0.0005281	69	140	15	211
791	0.0005006	81	136	15	191
792	0.0004418	57	119	13	181
793	0.0004926	106	148	14	190
794	0.000548	79	140	19	201
795	0.0005441	105	155	15	205
796	0.0004541	18	119	17	220
797	0.0004871	100	145	16	190
798	0.0004715	64	138	17	212
799	0.0004795	51	136	19	221
800	0.0004492	50	126	15	202
801	0.0004877	129	160	18	191
802	0.0003702	68	131	15	194
803	0.0004868	93	155	15	217
804	0.0004999	65	135	14	205
805	0.0004752	43	131	17	219
806	0.0004949	101	148	18	195
807	0.0004615	89	151	14	213
808	0.000478	47	145	19	243
809	0.000462	75	146	14	217
810	0.0005087	84	152	18	220
811	0.000477	20	117	19	214
812	0.0005206	92	167	15	242
813	0.0005842	97	151	17	205
814	0.0004769	75	140	18	205
815	0.0004978	55	143	19	231
816	0.0004585	41	130	19	219
817	0.0004872	83	148	16	213
818	0.000462	59	144	17	229
819	0.0003524	66	127	15	188
820	0.0004902	58	131	18	204
821	0.0005462	76	152	19	228
822	0.0004693	34	132	19	230
823	0.0004879	98	146	15	194
824	0.0004777	82	132	14	182
825	0.0005371	41	139	18	237
826	0.000481	82	135	14	188
827	0.0004857	70	142	19	214
828	0.0004575	46	125	17	204
829	0.0004862	65	142	17	219
830	0.0004493	73	135	12	197
831	0.0004945	64	137	16	210
832	0.0004883	57	145	15	233
833	0.0004988	58	134	18	210
834	0.0005153	81	154	18	227
835	0.0004913	73	144	16	215
836	0.0005033	71	142	14	213
837	0.0004644	49	129	17	209
838	0.0004475	75	128	14	181
839	0.0004721	42	126	19	210
840	0.0004839	64	137	17	210
841	0.0004772	77	137	13	197
842	0.0004706	73	142	15	211
843	0.000493	63	143	16	223
844	0.0004701	94	151	13	208
845	0.0005005	82	132	15	182
846	0.000501	106	149	17	192
847	0.0004836	61	146	15	231
848	0.0004626	67	134	16	201
849	0.0004596	91	137	13	183
850	0.0004733	59	139	16	219
851	0.0004813	55	136	18	217
852	0.0006759	87	142	17	197
853	0.0004926	91	158	17	225
854	0.0005071	119	159	16	199
855	0.0005027	94	149	17	204
856	0.0004858	42	127	16	212
857	0.0004815	76	147	16	218
858	0.0004684	59	140	18	221
859	0.0004758	46	135	18	224
860	0.0004805	70	148	17	226
861	0.0004458	70	126	14	182
862	0.0004966	97	146	13	195
863	0.0003578	39	133	16	227
864	0.0004722	74	137	16	200
865	0.0004792	31	131	18	231
866	0.0004977	39	130	17	221
867	0.0004316	17	124	16	231
868	0.0004718	80	139	16	198
869	0.0005302	128	159	14	190
870	0.0004841	117	153	16	189
871	0.0004885	88	149	16	210
872	0.0004762	7	118	19	229
873	0.0004927	102	161	19	220
874	0.0004719	63	139	17	215
875	0.0005013	64	139	16	214
876	0.0004762	119	150	14	181
877	0.0004818	65	140	14	215
878	0.0004977	104	157	19	210
879	0.0004811	26	127	16	228
880	0.0004691	86	147	15	208
881	0.0005403	55	149	15	243
882	0.0004798	63	133	15	203
883	0.0004678	52	137	19	222
884	0.000584	77	149	15	221
885	0.0004771	31	129	17	227
886	0.0004769	19	122	17	225
887	0.0005692	97	160	17	223
888	0.0004947	83	145	16	207
889	0.0004685	58	141	15	224
890	0.0004848	68	147	15	226
891	0.00051	100	146	14	192
892	0.0004943	72	145	13	218
893	0.0005007	18	141	19	264
894	0.0004968	102	157	17	212
895	0.0004701	50	137	17	224
896	0.0004999	100	153	16	206
897	0.0004539	64	134	14	204
898	0.0004868	110	151	13	192
899	0.0004813	118	153	15	188
900	0.0005229	40	129	14	218
901	0.0004746	30	122	15	214
902	0.0004788	42	133	18	224
903	0.0004906	2	127	18	252
904	0.0004868	114	159	19	204
905	0.0004831	74	143	19	212
906	0.0004885	64	141	13	218
907	0.0004703	42	133	17	224
908	0.0003807	50	134	13	218
909	0.0004843	38	133	19	228
910	0.0004605	81	130	16	179
911	0.0004835	102	155	15	208
912	0.0003749	54	136	12	218
913	0.0004825	62	139	15	216
914	0.0005293	85	146	16	207
915	0.0005284	107	150	18	193
916	0.0004571	43	132	15	221
917	0.000478	79	144	17	209
918	0.0005148	104	148	14	192
919	0.0004991	98	148	13	198
920	0.0004994	70	145	17	220
921	0.0004475	31	131	16	231
922	0.0004873	63	132	18	201
923	0.000478	61	147	18	233
924	0.0005107	60	135	14	210
925	0.000591	101	164	16	227
926	0.000369	50	125	13	200
927	0.000501	43	130	18	217
928	0.0005066	61	137	17	213
929	0.0005653	82	148	16	214
930	0.0005167	134	168	19	202
931	0.0004717	3	126	19	249
932	0.0004744	82	138	16	194
933	0.0004802	59	131	15	203
934	0.0004751	95	146	16	197
935	0.0004736	79	146	19	213
936	0.0004806	53	141	19	229
937	0.0005068	66	128	14	190
938	0.0004773	60	135	13	210
939	0.0005286	86	144	17	202
940	0.0004917	76	149	14	222
941	0.0005568	72	136	18	200
942	0.0003699	44	131	13	218
943	0.0004829	47	139	14	231
944	0.0005029	48	136	15	224
945	0.0005036	53	128	12	203
946	0.0004896	63	141	19	219
947	0.0004723	70	140	14	210
948	0.0004759	58	128	19	198
949	0.0004872	90	139	14	188
950	0.0005012	80	139	14	198
951	0.0004564	71	130	17	189
952	0.0003678	79	129	10	179
953	0.000484	87	138	14	189
954	0.0005708	86	144	15	202
955	0.0004817	74	140	15	206
956	0.0004818	108	149	15	190
957	0.0004872	75	133	13	191
958	0.0005228	105	171	17	237
959	0.0005489	71	154	16	237
960	0.0005136	126	164	16	202
961	0.0004792	43	141	19	239
962	0.0005155	44	141	19	238
963	0.0003559	10	113	15	216
964	0.0004746	61	146	16	231
965	0.0004894	73	145	17	217
966	0.0004916	65	150	14	235
967	0.0004943	46	136	14	226
968	0.0004924	76	142	17	208
969	0.0006332	76	140	15	204
970	0.0005587	69	151	18	233
971	0.0004938	76	138	17	200
972	0.0004653	64	132	15	200
973	0.00047	90	148	17	206
974	0.0006346	72	148	16	224
975	0.0004951	70	150	17	230
976	0.0004647	19	122	18	225
977	0.0003577	44	130	18	216
978	0.0004919	99	154	15	209
979	0.0004586	48	128	17	208
980	0.0004825	73	151	19	229
981	0.0004879	85	147	19	209
982	0.0005119	106	157	17	208
983	0.0004854	73	145	13	217
984	0.0004679	58	136	16	214
985	0.0004838	74	136	18	198
986	0.0004931	73	148	16	223
987	0.0005376	52	126	16	200
988	0.0004929	89	154	18	219
989	0.0004589	61	131	16	201
990	0.0005493	52	142	19	232
991	0.0005462	81	136	13	191
992	0.0004744	91	148	12	205
993	0.0004839	86	145	16	204
994	0.0004481	46	129	13	212
995	0.0005203	120	153	16	186
996	0.0004863	25	131	19	237
997	0.0004609	57	139	19	221
998	0.0004712	50	146	15	242
999	0.0005027	133	160	18	187
mean	0.000487617	71.086	140.551	16.127	210.016

## Sheet: PowerBalance_Bal
	time	SEq	Bal	Reg	Egal
0	0.0004544	49	133	16	217
1	0.0004764	75	143	16	211
2	0.0004923	40	135	15	230
3	0.0005231	95	138	14	181
4	0.0004729	89	153	13	217
5	0.0003626	61	136	17	211
6	0.0004483	56	126	17	196
7	0.0005126	104	146	15	188
8	0.0004458	47	131	18	215
9	0.0004553	85	139	12	193
10	0.0005314	76	148	18	220
11	0.0004841	73	137	15	201
12	0.0005066	24	136	16	248
13	0.000519	53	134	18	215
14	0.0004871	57	139	17	221
15	0.0004882	50	132	17	214
16	0.0004819	59	142	17	225
17	0.0005018	108	153	14	198
18	0.0004678	28	134	19	240
19	0.0004825	86	144	14	202
20	0.0004835	55	134	17	213
21	0.0004461	68	136	14	204
22	0.0005065	59	138	12	217
23	0.0005044	68	145	15	222
24	0.0005118	102	148	14	194
25	0.0004812	65	136	13	207
26	0.0004917	54	140	16	226
27	0.0004909	76	137	16	198
28	0.0004722	90	147	17	204
29	0.0004865	120	159	14	198
30	0.000493	66	146	14	226
31	0.0005114	23	125	15	227
32	0.0005024	108	161	18	214
33	0.0005029	82	144	17	206
34	0.0004632	65	138	17	211
35	0.0004924	98	153	16	208
36	0.0004849	61	143	15	225
37	0.0004579	67	137	11	207
38	0.0005272	91	157	19	223
39	0.0005538	8	136	18	264
40	0.0004675	52	138	16	224
41	0.0005056	52	125	17	198
42	0.0004561	37	130	15	223
43	0.0004925	53	143	17	233
44	0.0004595	23	127	17	231
45	0.0005701	80	141	14	202
46	0.0004978	99	139	14	179
47	0.0004837	68	143	14	218
48	0.0004706	72	138	14	204
49	0.0005156	62	135	14	208
50	0.0004773	67	140	16	213
51	0.0004727	69	132	14	195
52	0.0004849	77	137	19	197
53	0.0003757	51	140	19	229
54	0.0005637	76	144	14	212
55	0.0004943	108	156	16	204
56	0.0004871	40	129	19	218
57	0.0004841	103	148	14	193
58	0.0004841	34	135	16	236
59	0.0003922	76	145	14	214
60	0.0004909	79	144	18	209
61	0.000533	107	149	13	191
62	0.0004834	92	151	17	210
63	0.0005227	58	131	15	204
64	0.0003662	37	133	18	229
65	0.0004872	99	152	16	205
66	0.0004895	51	126	17	201
67	0.0005295	90	143	13	196
68	0.0005129	65	147	18	229
69	0.0005173	119	159	18	199
70	0.0004971	94	139	16	184
71	0.0006115	122	151	16	180
72	0.0004771	38	136	18	234
73	0.0004607	92	142	16	192
74	0.0003532	25	123	19	221
75	0.0005348	95	130	14	165
76	0.0005292	106	143	14	180
77	0.0005094	69	148	19	227
78	0.0004765	93	143	15	193
79	0.0005186	69	137	16	205
80	0.000541	69	154	18	239
81	0.0005508	69	141	17	213
82	0.0004737	79	141	17	203
83	0.0005042	32	128	19	224
84	0.0004592	59	141	15	223
85	0.000435	64	132	17	200
86	0.0005126	92	152	14	212
87	0.0005405	118	153	16	188
88	0.00047	84	148	15	212
89	0.0004918	25	140	18	255
90	0.0004708	95	149	14	203
91	0.0005093	97	149	19	201
92	0.0005918	80	134	19	188
93	0.0004925	20	133	19	246
94	0.0005201	74	144	18	214
95	0.0004924	100	154	14	208
96	0.0005672	62	141	15	220
97	0.0004893	66	143	17	220
98	0.0004621	104	150	17	196
99	0.0005221	45	134	14	223
100	0.0004518	59	136	18	213
101	0.0005115	88	145	14	202
102	0.0004544	41	126	17	211
103	0.0004613	55	135	14	215
104	0.0004804	84	151	19	218
105	0.0005111	81	167	19	253
106	0.0004952	83	135	14	187
107	0.0003665	46	121	15	196
108	0.0005324	83	145	18	207
109	0.000485	54	137	14	220
110	0.0005269	69	133	16	197
111	0.0004081	77	135	13	193
112	0.000452	52	140	13	228
113	0.0004797	41	130	19	219
114	0.0004766	95	135	15	175
115	0.0004824	38	129	15	220
116	0.0004285	49	121	15	193
117	0.0003542	39	125	11	211
118	0.0004874	61	131	14	201
119	0.0004634	45	141	17	237
120	0.0004857	58	134	14	210
121	0.0004653	69	141	16	213
122	0.0005019	95	155	17	215
123	0.000467	62	137	15	212
124	0.0004868	60	121	12	182
125	0.0005635	39	135	19	231
126	0.0004817	60	140	15	220
127	0.0004839	43	138	17	233
128	0.0004952	37	129	18	221
129	0.0005128	114	158	17	202
130	0.0004717	87	142	17	197
131	0.0004792	75	144	16	213
132	0.00048	75	143	18	211
133	0.0003608	41	124	15	207
134	0.0003697	54	131	14	208
135	0.0004964	87	148	13	209
136	0.0004904	53	143	18	233
137	0.0004959	96	146	18	196
138	0.0004923	122	161	13	200
139	0.0004734	93	139	18	185
140	0.0005752	117	162	14	207
141	0.0004491	67	136	18	205
142	0.000483	112	162	17	212
143	0.0005878	11	134	19	257
144	0.0004799	97	140	16	183
145	0.0004772	53	140	16	227
146	0.0004779	75	141	17	207
147	0.000496	77	135	17	193
148	0.0005098	83	147	17	211
149	0.0004827	42	138	18	234
150	0.0005074	111	158	13	205
151	0.0004881	90	150	18	210
152	0.000515	123	165	14	207
153	0.000365	86	147	17	208
154	0.0005251	85	155	17	225
155	0.0003784	49	123	13	197
156	0.0004722	50	115	15	180
157	0.0005402	129	164	18	199
158	0.0004797	95	144	18	193
159	0.0005452	129	176	19	223
160	0.0004553	47	134	18	221
161	0.0005209	62	147	17	232
162	0.0004569	69	134	15	199
163	0.0004764	92	151	17	210
164	0.0005777	42	128	16	214
165	0.0004959	105	157	17	209
166	0.0004825	66	127	15	188
167	0.0005481	42	136	18	230
168	0.0005313	78	145	15	212
169	0.0005052	116	164	19	212
170	0.0005057	67	143	16	219
171	0.000516	119	160	19	201
172	0.0004531	82	135	19	188
173	0.0004757	47	127	17	207
174	0.0004285	38	124	16	210
175	0.0005448	54	139	16	224
176	0.0004819	54	138	19	222
177	0.0004942	71	134	16	197
178	0.0004893	73	132	15	191
179	0.0005118	98	147	16	196
180	0.000485	80	145	18	210
181	0.0005018	99	148	17	197
182	0.0004837	41	146	17	251
183	0.000462	102	147	15	192
184	0.0005491	108	151	16	194
185	0.0005203	119	157	19	195
186	0.0004669	47	141	18	235
187	0.0004855	86	139	12	192
188	0.0005047	65	144	13	223
189	0.0004685	88	144	18	200
190	0.0005282	98	148	13	198
191	0.0005071	54	136	19	218
192	0.0004769	93	149	16	205
193	0.0004862	43	138	17	233
194	0.0005067	80	137	16	194
195	0.0004964	61	133	19	205
196	0.0005018	70	141	14	212
197	0.0004702	69	137	16	205
198	0.0006203	65	149	18	233
199	0.0004545	76	131	15	186
200	0.0004966	74	142	15	210
201	0.0004596	53	127	18	201
202	0.0004632	87	143	17	199
203	0.0004746	81	154	18	227
204	0.0004705	55	131	16	207
205	0.0004839	38	129	17	220
206	0.0003666	48	133	19	218
207	0.0005745	74	144	17	214
208	0.0004681	49	133	14	217
209	0.0004822	29	133	19	237
210	0.0003589	57	119	16	181
211	0.0004728	72	151	19	230
212	0.0005262	55	140	18	225
213	0.0004908	88	144	15	200
214	0.0005276	67	140	17	213
215	0.0004838	105	149	14	193
216	0.0003579	47	128	18	209
217	0.0005096	52	128	18	204
218	0.0004759	47	132	17	217
219	0.0005236	72	133	16	194
220	0.0005153	113	154	16	195
221	0.0006292	91	143	15	195
222	0.00036	33	133	19	233
223	0.000494	81	140	16	199
224	0.0005022	112	146	12	180
225	0.0004638	64	132	15	200
226	0.00046	113	145	14	177
227	0.0004687	80	148	14	216
228	0.0004812	115	147	14	179
229	0.0005382	105	152	17	199
230	0.0005738	77	139	18	201
231	0.0004736	36	122	16	208
232	0.000372	71	140	19	209
233	0.0004825	62	151	17	240
234	0.0004608	84	133	11	182
235	0.0004782	102	154	18	206
236	0.0005465	96	155	13	214
237	0.000485	68	143	16	218
238	0.0005113	67	133	18	199
239	0.0004918	78	149	13	220
240	0.0004983	70	147	15	224
241	0.0004975	87	149	18	211
242	0.0004988	78	155	15	232
243	0.0004973	100	153	14	206
244	0.0004689	86	144	17	202
245	0.0004872	52	140	18	228
246	0.000496	85	142	19	199
247	0.0005382	97	155	17	213
248	0.0004802	38	124	16	210
249	0.0003567	34	129	18	224
250	0.0005018	77	133	16	189
251	0.0003637	49	132	19	215
252	0.0004723	54	136	12	218
253	0.0004939	56	140	19	224
254	0.0004932	102	142	14	182
255	0.000472	59	139	18	219
256	0.0005044	69	142	15	215
257	0.0004673	76	147	15	218
258	0.0004483	92	140	19	188
259	0.0004671	83	144	18	205
260	0.0005009	81	143	16	205
261	0.0005229	77	141	13	205
262	0.0004979	26	135	16	244
263	0.0004815	74	140	16	206
264	0.0005908	9	129	19	249
265	0.0004854	74	139	17	204
266	0.0004353	50	127	19	204
267	0.0003581	43	124	15	205
268	0.0005732	63	137	16	211
269	0.0005414	50	131	15	212
270	0.000503	127	154	16	181
271	0.0003782	70	130	17	190
272	0.0004597	17	134	17	251
273	0.0004511	69	134	18	199
274	0.0004988	56	141	19	226
275	0.0004615	78	135	15	192
276	0.0004806	100	154	16	208
277	0.0004937	44	143	19	242
278	0.000508	48	139	18	230
279	0.0005325	103	151	19	199
280	0.0004741	47	141	19	235
281	0.0005009	73	141	15	209
282	0.0005039	51	140	15	229
283	0.0005214	33	129	16	225
284	0.0005595	97	145	17	193
285	0.0003577	47	122	12	197
286	0.0004882	112	161	18	210
287	0.0005063	71	145	16	219
288	0.0004778	54	137	18	220
289	0.0004585	52	135	16	218
290	0.0004794	52	141	18	230
291	0.0005321	81	143	14	205
292	0.0004822	73	142	19	211
293	0.0004764	70	151	19	232
294	0.0004098	38	134	15	230
295	0.0004909	51	141	16	231
296	0.000499	96	134	13	172
297	0.0004843	89	134	13	179
298	0.0004685	79	135	13	191
299	0.0005262	87	166	17	245
300	0.0004775	64	133	12	202
301	0.000468	55	135	16	215
302	0.0004858	59	139	13	219
303	0.0004641	61	134	14	207
304	0.0004801	95	139	12	183
305	0.0006252	82	152	17	222
306	0.0004699	105	144	16	183
307	0.0004619	75	142	16	209
308	0.00048	103	155	13	207
309	0.0005284	87	141	15	195
310	0.0005214	79	160	18	241
311	0.0003813	21	136	18	251
312	0.0004368	76	133	14	190
313	0.0005035	83	149	14	215
314	0.0004783	106	146	18	186
315	0.0004772	85	141	19	197
316	0.0005328	69	128	14	187
317	0.0004926	40	124	17	208
318	0.0005221	106	153	13	200
319	0.0004736	61	141	18	221
320	0.0004841	117	154	13	191
321	0.000529	96	152	19	208
322	0.000503	19	123	19	227
323	0.0005232	82	151	14	220
324	0.0003636	51	126	16	201
325	0.0003961	20	127	18	234
326	0.0004943	65	138	16	211
327	0.0004836	58	147	17	236
328	0.0004738	43	123	16	203
329	0.0005238	113	162	18	211
330	0.0004522	53	129	15	205
331	0.000531	114	157	17	200
332	0.0004576	60	137	16	214
333	0.0004546	98	142	13	186
334	0.0004906	121	162	17	203
335	0.0004929	79	146	16	213
336	0.0004802	56	138	16	220
337	0.0005178	98	152	15	206
338	0.0004893	88	146	13	204
339	0.0004663	74	141	19	208
340	0.0005763	86	142	13	198
341	0.0004909	116	146	17	176
342	0.0003636	61	136	13	211
343	0.0003664	59	125	18	191
344	0.0004641	41	132	18	223
345	0.0004575	58	137	15	216
346	0.0004805	71	139	16	207
347	0.0005605	22	142	19	262
348	0.0004648	82	136	12	190
349	0.0004931	121	158	14	195
350	0.0005106	70	146	19	222
351	0.0005153	97	148	12	199
352	0.000471	60	141	17	222
353	0.0004924	38	139	17	240
354	0.000541	69	136	17	203
355	0.0004989	65	139	19	213
356	0.0005668	86	138	18	190
357	0.000467	107	151	16	195
358	0.0005607	87	141	15	195
359	0.0003571	39	122	15	205
360	0.0004685	30	129	18	228
361	0.0004864	82	146	13	210
362	0.0005148	160	176	19	192
363	0.0004941	55	143	19	231
364	0.0004583	71	143	17	215
365	0.0005243	89	148	15	207
366	0.0003589	39	130	17	221
367	0.0005306	56	130	18	204
368	0.0005196	71	146	16	221
369	0.0004854	41	129	17	217
370	0.0004866	106	147	15	188
371	0.0004831	87	153	14	219
372	0.0004572	78	140	16	202
373	0.0005013	68	148	19	228
374	0.0005334	83	144	15	205
375	0.0003715	70	141	18	212
376	0.0005101	44	135	18	226
377	0.0005013	79	148	16	217
378	0.0004683	78	141	17	204
379	0.000525	93	149	14	205
380	0.0004817	56	134	19	212
381	0.0004637	51	133	16	215
382	0.0004878	107	144	18	181
383	0.00046	73	139	14	205
384	0.000586	62	140	17	218
385	0.0004903	63	140	19	217
386	0.0005272	112	157	19	202
387	0.0004532	60	128	16	196
388	0.0005177	49	130	14	211
389	0.0005092	57	141	18	225
390	0.0004854	51	129	18	207
391	0.0004838	74	137	12	200
392	0.0004889	76	140	18	204
393	0.0003922	43	118	18	193
394	0.0004886	77	146	13	215
395	0.0004737	43	135	18	227
396	0.0004782	103	157	16	211
397	0.0004887	71	148	17	225
398	0.0004673	102	152	18	202
399	0.0005203	107	151	18	195
400	0.0004895	59	137	17	215
401	0.0005357	85	153	15	221
402	0.0004783	56	129	17	202
403	0.000601	26	139	18	252
404	0.0004814	46	141	19	236
405	0.0004966	45	137	15	229
406	0.000458	47	131	13	215
407	0.0004663	86	156	17	226
408	0.0005293	89	151	14	213
409	0.0005284	81	141	13	201
410	0.0005185	64	148	13	232
411	0.0004873	48	134	19	220
412	0.0004494	82	147	18	212
413	0.0004898	80	139	16	198
414	0.0004927	69	132	17	195
415	0.0004849	134	163	17	192
416	0.0004626	74	140	17	206
417	0.0003712	35	122	19	209
418	0.0004922	31	133	17	235
419	0.0004676	98	149	14	200
420	0.000484	101	146	15	191
421	0.0004964	83	151	17	219
422	0.0004768	34	125	18	216
423	0.000526	39	128	16	217
424	0.0004767	79	138	16	197
425	0.0005364	97	141	14	185
426	0.0004644	78	139	14	200
427	0.0004937	63	130	14	197
428	0.000482	55	151	17	247
429	0.0004727	122	153	17	184
430	0.0004731	67	148	17	229
431	0.0005352	83	154	19	225
432	0.0004529	85	143	16	201
433	0.0004514	36	112	17	188
434	0.0005367	113	161	15	209
435	0.0005115	68	129	17	190
436	0.0004978	45	130	16	215
437	0.0004983	124	164	16	204
438	0.0005193	70	138	15	206
439	0.0004517	49	128	16	207
440	0.0005004	74	147	15	220
441	0.000363	9	117	16	225
442	0.0004573	81	131	16	181
443	0.0004816	67	138	13	209
444	0.0004647	79	139	15	199
445	0.0005022	69	137	17	205
446	0.0005115	23	126	19	229
447	0.0005021	53	138	18	223
448	0.0004458	30	135	19	240
449	0.0005318	66	132	16	198
450	0.0004136	52	130	15	208
451	0.0004549	79	142	13	205
452	0.0005009	75	141	17	207
453	0.0005081	90	152	17	214
454	0.000481	73	134	14	195
455	0.0004933	51	138	17	225
456	0.0004888	81	141	15	201
457	0.0004756	51	130	18	209
458	0.0004657	58	139	19	220
459	0.0004675	83	142	14	201
460	0.0005989	28	136	18	244
461	0.000498	73	132	19	191
462	0.0005611	77	144	17	211
463	0.0005429	97	146	19	195
464	0.0004742	86	153	19	220
465	0.0005157	100	150	15	200
466	0.000479	47	137	18	227
467	0.0005031	81	141	16	201
468	0.0004513	56	141	19	226
469	0.0004837	60	141	17	222
470	0.0005534	101	147	17	193
471	0.0005763	80	148	17	216
472	0.0004854	104	150	15	196
473	0.0005077	98	143	16	188
474	0.0005085	93	153	16	213
475	0.0004738	114	150	19	186
476	0.000449	24	131	16	238
477	0.0005048	90	139	14	188
478	0.0004806	95	149	17	203
479	0.00055	98	149	16	200
480	0.0004569	59	135	13	211
481	0.0004612	74	149	17	224
482	0.0004933	111	161	15	211
483	0.0004601	22	124	18	226
484	0.0005655	37	139	15	241
485	0.0004737	82	134	15	186
486	0.0004795	59	131	13	203
487	0.0004752	75	139	18	203
488	0.0004634	35	133	19	231
489	0.0004915	84	144	18	204
490	0.0004568	72	144	15	216
491	0.0004872	86	139	15	192
492	0.0005216	20	131	18	242
493	0.0004768	95	141	16	187
494	0.0005044	87	151	19	215
495	0.0011815	80	148	16	216
496	0.0004822	53	134	16	215
497	0.0004874	20	138	19	256
498	0.0004753	118	155	19	192
499	0.0004819	51	137	17	223
500	0.0005137	26	125	18	224
501	0.0005013	54	134	16	214
502	0.0004563	66	138	17	210
503	0.0005034	67	142	19	217
504	0.00049	92	135	12	178
505	0.0005225	75	145	19	215
506	0.0005122	95	155	19	215
507	0.0003687	41	135	18	229
508	0.00049	64	139	15	214
509	0.0005177	36	124	17	212
510	0.0004723	115	143	17	171
511	0.0004932	77	149	15	221
512	0.00035	29	116	14	203
513	0.0004954	97	144	14	191
514	0.0004846	90	146	14	202
515	0.0004799	122	152	15	182
516	0.0004862	26	131	17	236
517	0.0004987	38	127	19	216
518	0.0005011	20	137	19	254
519	0.0005028	71	153	17	235
520	0.0004844	54	145	14	236
521	0.0004823	104	153	19	202
522	0.0005218	87	141	15	195
523	0.0005022	97	140	18	183
524	0.0004597	47	131	15	215
525	0.0004781	33	124	17	215
526	0.0005082	62	144	18	226
527	0.0004925	117	155	16	193
528	0.0003565	35	127	16	219
529	0.0004986	92	154	19	216
530	0.0004608	77	142	14	207
531	0.0004966	77	148	13	219
532	0.0005023	52	141	17	230
533	0.0004641	71	142	15	213
534	0.0005133	85	143	17	201
535	0.000521	82	139	12	196
536	0.0005003	93	151	18	209
537	0.0004858	50	133	17	216
538	0.0003699	25	124	17	223
539	0.0004686	56	132	15	208
540	0.0004652	66	137	16	208
541	0.0005089	87	148	15	209
542	0.0005842	86	144	19	202
543	0.0004858	62	132	12	202
544	0.000503	76	134	19	192
545	0.0005246	114	157	15	200
546	0.0003649	60	134	18	208
547	0.0004598	63	124	15	185
548	0.000392	49	139	16	229
549	0.0004627	74	128	16	182
550	0.0004961	91	142	14	193
551	0.0005047	52	136	15	220
552	0.0004888	43	123	17	203
553	0.0005201	52	137	19	222
554	0.0004726	104	150	17	196
555	0.000477	50	142	17	234
556	0.0004915	104	155	14	206
557	0.0005217	82	147	17	212
558	0.0004938	116	150	16	184
559	0.0004868	61	138	18	215
560	0.0004672	56	131	14	206
561	0.0005009	78	146	19	214
562	0.000475	58	132	15	206
563	0.0004936	91	151	15	211
564	0.0005589	81	142	17	203
565	0.0005036	76	150	17	224
566	0.0005124	39	141	15	243
567	0.0004812	90	143	15	196
568	0.0003729	33	137	15	241
569	0.0003534	65	121	12	177
570	0.0005408	91	148	18	205
571	0.0004992	74	153	18	232
572	0.0004846	95	152	14	209
573	0.0004505	62	125	15	188
574	0.0003834	57	125	13	193
575	0.0004631	75	140	17	205
576	0.0005006	92	148	14	204
577	0.0004938	86	150	13	214
578	0.000513	82	149	19	216
579	0.0005305	20	140	19	260
580	0.000555	102	150	16	198
581	0.0003607	40	128	17	216
582	0.0005367	85	153	14	221
583	0.0003666	46	121	16	196
584	0.0004746	45	134	18	223
585	0.0004877	62	135	18	208
586	0.0004596	79	136	15	193
587	0.000488	41	125	16	209
588	0.0004716	65	145	16	225
589	0.0004881	50	145	19	240
590	0.0005126	114	161	17	208
591	0.0004924	89	150	14	211
592	0.0004551	74	127	14	180
593	0.0004573	65	134	19	203
594	0.0004699	52	127	13	202
595	0.0005466	29	116	19	203
596	0.000475	85	146	13	207
597	0.0005438	84	150	19	216
598	0.0004839	80	134	12	188
599	0.0005156	90	154	17	218
600	0.0004721	77	142	16	207
601	0.0005045	70	139	15	208
602	0.0003594	82	139	12	196
603	0.0007113	110	155	19	200
604	0.000476	64	142	18	220
605	0.000494	78	144	18	210
606	0.0004863	100	140	18	180
607	0.0004767	44	135	19	226
608	0.0004697	39	129	18	219
609	0.0004611	53	137	19	221
610	0.0004628	87	140	15	193
611	0.0004937	104	147	16	190
612	0.0005037	52	148	16	244
613	0.0005034	72	143	13	214
614	0.0005259	92	137	15	182
615	0.000476	25	139	19	253
616	0.0005205	72	137	13	202
617	0.0004933	111	157	17	203
618	0.0005082	69	139	14	209
619	0.0003678	52	133	18	214
620	0.0004754	80	138	15	196
621	0.0004781	99	155	18	211
622	0.0004994	54	135	16	216
623	0.0005082	81	138	13	195
624	0.0005004	77	138	18	199
625	0.0005018	111	154	17	197
626	0.0005042	76	142	15	208
627	0.0004985	65	146	19	227
628	0.0004862	69	139	16	209
629	0.0004895	39	140	16	241
630	0.0004959	131	152	14	173
631	0.0005075	97	144	17	191
632	0.0004896	71	139	18	207
633	0.0007055	54	135	16	216
634	0.0004848	87	147	15	207
635	0.0005436	110	144	13	178
636	0.0004821	62	138	16	214
637	0.00051	36	138	18	240
638	0.0004722	65	134	14	203
639	0.0004863	66	140	15	214
640	0.0004782	55	136	15	217
641	0.000489	24	131	19	238
642	0.0004911	109	157	13	205
643	0.0004537	89	137	16	185
644	0.0005421	57	125	15	193
645	0.0005044	85	152	12	219
646	0.0005	102	146	16	190
647	0.0004938	67	141	13	215
648	0.0004756	52	131	16	210
649	0.0004776	66	132	19	198
650	0.0003533	20	118	19	216
651	0.0003733	72	142	16	212
652	0.0004717	110	143	17	176
653	0.0004939	84	142	13	200
654	0.0004921	78	135	13	192
655	0.0004774	80	151	15	222
656	0.0004902	35	121	18	207
657	0.0003502	72	118	17	164
658	0.0004573	91	140	13	189
659	0.0004613	99	156	16	213
660	0.0005647	109	152	19	195
661	0.0006012	50	135	15	220
662	0.0004858	81	135	15	189
663	0.0005089	19	133	17	247
664	0.0005235	131	164	18	197
665	0.0004536	59	129	13	199
666	0.000701	105	158	16	211
667	0.0004649	84	145	19	206
668	0.0004731	63	146	17	229
669	0.0004705	107	155	18	203
670	0.0004817	64	139	16	214
671	0.0004925	51	147	17	243
672	0.0004945	75	138	19	201
673	0.0004941	101	143	17	185
674	0.0005317	97	141	13	185
675	0.0004788	26	122	14	218
676	0.0004715	94	144	15	194
677	0.0004631	58	128	16	198
678	0.0004587	39	125	16	211
679	0.0005512	107	152	15	197
680	0.000478	81	143	14	205
681	0.0004827	73	149	17	225
682	0.0004711	67	135	19	203
683	0.0004747	78	155	15	232
684	0.0004882	53	136	18	219
685	0.0003771	39	128	18	217
686	0.0004668	51	124	13	197
687	0.0005186	92	163	16	234
688	0.0004948	57	125	14	193
689	0.0005132	20	138	19	256
690	0.0003577	44	124	16	204
691	0.0006692	61	144	13	227
692	0.0004803	32	127	17	222
693	0.0004531	63	142	16	221
694	0.0004785	67	140	14	213
695	0.0005179	74	141	17	208
696	0.0004722	101	143	14	185
697	0.0004685	43	130	13	217
698	0.0004793	8	121	17	234
699	0.0004862	87	136	14	185
700	0.0004925	83	136	15	189
701	0.0004868	98	159	17	220
702	0.0003506	28	117	17	206
703	0.0004827	91	149	17	207
704	0.0004938	105	144	14	183
705	0.0004672	73	145	17	217
706	0.0005579	79	147	14	215
707	0.0004986	101	157	15	213
708	0.000458	84	141	18	198
709	0.0005052	42	132	13	222
710	0.000504	80	134	16	188
711	0.0004739	104	150	18	196
712	0.000452	64	150	14	236
713	0.0004541	93	142	17	191
714	0.0004727	80	138	16	196
715	0.0005195	36	124	15	212
716	0.0004596	74	144	16	214
717	0.0004817	67	122	17	177
718	0.0004946	55	134	19	213
719	0.0005028	106	145	19	184
720	0.0004567	89	144	13	199
721	0.000484	89	156	15	223
722	0.0004711	86	132	14	178
723	0.0004934	74	147	16	220
724	0.0004608	98	142	16	186
725	0.0004626	100	144	14	188
726	0.0004701	83	141	13	199
727	0.0004579	77	144	13	211
728	0.0005937	86	149	17	212
729	0.0004927	56	126	14	196
730	0.000474	85	151	16	217
731	0.000487	76	147	14	218
732	0.0004925	65	145	16	225
733	0.0005454	89	135	11	181
734	0.0004815	106	155	18	204
735	0.0004721	118	154	18	190
736	0.0004741	75	150	18	225
737	0.0005585	73	139	16	205
738	0.0004564	68	133	11	198
739	0.000491	100	155	16	210
740	0.0004739	90	137	14	184
741	0.0004629	51	125	12	199
742	0.0004812	85	145	14	205
743	0.0004565	69	141	19	213
744	0.0003868	79	133	13	187
745	0.0004903	55	130	16	205
746	0.0004797	69	134	19	199
747	0.000508	102	151	12	200
748	0.0004968	106	146	13	186
749	0.0004867	48	141	17	234
750	0.0004858	49	136	18	223
751	0.000464	66	135	14	204
752	0.0005256	121	157	15	193
753	0.000499	37	128	15	219
754	0.0004823	91	157	16	223
755	0.0005072	103	152	15	201
756	0.0004921	102	147	14	192
757	0.0003559	67	124	16	181
758	0.0004862	82	135	14	188
759	0.0003536	33	125	17	217
760	0.0005091	102	143	16	184
761	0.0004681	25	123	18	221
762	0.0004772	74	135	15	196
763	0.0004942	67	141	18	215
764	0.0005031	59	137	18	215
765	0.0003686	56	127	17	198
766	0.000492	109	144	14	179
767	0.0004789	64	136	17	208
768	0.0004892	113	152	14	191
769	0.0004971	24	126	18	228
770	0.0004676	62	133	16	204
771	0.0005567	67	143	16	219
772	0.0005103	66	129	15	192
773	0.0004982	83	142	15	201
774	0.0005178	31	139	18	247
775	0.0005017	111	153	15	195
776	0.0004815	32	125	18	218
777	0.0004771	78	146	14	214
778	0.0005056	119	153	17	187
779	0.0005102	16	128	19	240
780	0.0004773	43	143	19	243
781	0.0005562	55	149	16	243
782	0.0004818	102	149	14	196
783	0.0005464	39	131	18	223
784	0.0005202	69	141	19	213
785	0.0004892	89	134	14	179
786	0.0005498	24	131	16	238
787	0.0005097	101	165	17	229
788	0.0004977	62	134	17	206
789	0.0004856	3	130	18	257
790	0.0004604	69	140	15	211
791	0.0005056	81	136	15	191
792	0.0004444	57	119	13	181
793	0.0005054	106	148	14	190
794	0.0004669	79	140	19	201
795	0.0005789	105	155	15	205
796	0.0004538	18	119	17	220
797	0.0004918	100	145	16	190
798	0.0005369	64	138	17	212
799	0.000508	51	136	19	221
800	0.0004793	50	126	15	202
801	0.0004763	129	160	18	191
802	0.0004327	68	131	15	194
803	0.0004988	93	155	15	217
804	0.0004564	65	135	14	205
805	0.0004877	43	131	17	219
806	0.0004787	101	148	18	195
807	0.0004596	89	151	14	213
808	0.000538	47	145	19	243
809	0.0004525	75	146	14	217
810	0.000503	84	152	18	220
811	0.0004682	20	117	19	214
812	0.0005182	92	167	15	242
813	0.0006888	97	151	17	205
814	0.0005185	75	140	18	205
815	0.0005013	55	143	19	231
816	0.000452	41	130	19	219
817	0.000477	83	148	16	213
818	0.0004787	59	144	17	229
819	0.000356	66	127	15	188
820	0.0004647	58	131	18	204
821	0.0005122	76	152	19	228
822	0.0004846	34	132	19	230
823	0.0004755	98	146	15	194
824	0.0004955	82	132	14	182
825	0.0004675	41	139	18	237
826	0.0004927	82	135	14	188
827	0.0004605	70	142	19	214
828	0.0004564	46	125	17	204
829	0.0004955	65	142	17	219
830	0.0004528	73	135	12	197
831	0.0003693	64	137	16	210
832	0.0004736	57	145	15	233
833	0.0005308	58	134	18	210
834	0.0005668	81	154	18	227
835	0.0004748	73	144	16	215
836	0.0004816	71	142	14	213
837	0.0004927	49	129	17	209
838	0.000457	75	128	14	181
839	0.0004889	42	126	19	210
840	0.0004848	64	137	17	210
841	0.0004588	77	137	13	197
842	0.0004686	73	142	15	211
843	0.0004853	63	143	16	223
844	0.0004694	94	151	13	208
845	0.0004853	82	132	15	182
846	0.0004994	106	149	17	192
847	0.0004731	61	146	15	231
848	0.0004528	67	134	16	201
849	0.0004607	91	137	13	183
850	0.0004854	59	139	16	219
851	0.0004723	55	136	18	217
852	0.0004646	87	142	17	197
853	0.0004998	91	158	17	225
854	0.0005663	119	159	16	199
855	0.0004945	94	149	17	204
856	0.0004775	42	127	16	212
857	0.0005046	76	147	16	218
858	0.0004617	59	140	18	221
859	0.0004761	46	135	18	224
860	0.0004713	70	148	17	226
861	0.0004531	70	126	14	182
862	0.0004897	97	146	13	195
863	0.0003606	39	133	16	227
864	0.0004604	74	137	16	200
865	0.0006706	31	131	18	231
866	0.0004841	39	130	17	221
867	0.000389	17	124	16	231
868	0.0004751	80	139	16	198
869	0.000515	128	159	14	190
870	0.0005136	117	153	16	189
871	0.0005041	88	149	16	210
872	0.0004597	7	118	19	229
873	0.0007221	102	161	19	220
874	0.0004744	63	139	17	215
875	0.0004732	64	139	16	214
876	0.000549	119	150	14	181
877	0.0004696	65	140	14	215
878	0.0004975	104	157	19	210
879	0.0003556	26	127	16	228
880	0.0005386	86	147	15	208
881	0.0004865	55	149	15	243
882	0.0004785	63	133	15	203
883	0.0004556	52	137	19	222
884	0.0004874	77	149	15	221
885	0.0004761	31	129	17	227
886	0.000495	19	122	17	225
887	0.0004939	97	160	17	223
888	0.0004854	83	145	16	207
889	0.0005767	58	141	15	224
890	0.0004866	68	147	15	226
891	0.0005326	100	146	14	192
892	0.0004912	72	145	13	218
893	0.0004786	18	141	19	264
894	0.000482	102	157	17	212
895	0.0004598	50	137	17	224
896	0.0004936	100	153	16	206
897	0.0004449	64	134	14	204
898	0.0005107	110	151	13	192
899	0.0004793	118	153	15	188
900	0.0004908	40	129	14	218
901	0.0003667	30	122	15	214
902	0.0004505	42	133	18	224
903	0.0004911	2	127	18	252
904	0.0004817	114	159	19	204
905	0.0004801	74	143	19	212
906	0.0004883	64	141	13	218
907	0.0005158	42	133	17	224
908	0.0003719	50	134	13	218
909	0.0004764	38	133	19	228
910	0.0004604	81	130	16	179
911	0.0004878	102	155	15	208
912	0.0003631	54	136	12	218
913	0.0004782	62	139	15	216
914	0.0005279	85	146	16	207
915	0.0004974	107	150	18	193
916	0.000463	43	132	15	221
917	0.0005366	79	144	17	209
918	0.00047	104	148	14	192
919	0.0004664	98	148	13	198
920	0.0005056	70	145	17	220
921	0.0005192	31	131	16	231
922	0.0005431	63	132	18	201
923	0.000472	61	147	18	233
924	0.0004833	60	135	14	210
925	0.0005081	101	164	16	227
926	0.0003733	50	125	13	200
927	0.0004936	43	130	18	217
928	0.0004756	61	137	17	213
929	0.0005377	82	148	16	214
930	0.0005486	134	168	19	202
931	0.0004648	3	126	19	249
932	0.0004692	82	138	16	194
933	0.0004605	59	131	15	203
934	0.0004633	95	146	16	197
935	0.0004938	79	146	19	213
936	0.0004869	53	141	19	229
937	0.0005431	66	128	14	190
938	0.0004764	60	135	13	210
939	0.0004827	86	144	17	202
940	0.000481	76	149	14	222
941	0.0004897	72	136	18	200
942	0.0003778	44	131	13	218
943	0.0004934	47	139	14	231
944	0.0004785	48	136	15	224
945	0.0004699	53	128	12	203
946	0.000467	63	141	19	219
947	0.0004623	70	140	14	210
948	0.0004654	58	128	19	198
949	0.0004968	90	139	14	188
950	0.0004953	80	139	14	198
951	0.0004853	71	130	17	189
952	0.0003879	79	129	10	179
953	0.0004927	87	138	14	189
954	0.0004838	86	144	15	202
955	0.0004625	74	140	15	206
956	0.0004771	108	149	15	190
957	0.0004899	75	133	13	191
958	0.0005015	105	171	17	237
959	0.0005271	71	154	16	237
960	0.0004951	126	164	16	202
961	0.0004779	43	141	19	239
962	0.0004683	44	141	19	238
963	0.0003518	10	113	15	216
964	0.0004929	61	146	16	231
965	0.0005426	73	145	17	217
966	0.0005255	65	150	14	235
967	0.000519	46	136	14	226
968	0.0005052	76	142	17	208
969	0.0004941	76	140	15	204
970	0.0005753	69	151	18	233
971	0.0004926	76	138	17	200
972	0.0005227	64	132	15	200
973	0.0004664	90	148	17	206
974	0.0004716	72	148	16	224
975	0.0005644	70	150	17	230
976	0.0004817	19	122	18	225
977	0.0003548	44	130	18	216
978	0.0004973	99	154	15	209
979	0.0004539	48	128	17	208
980	0.0005052	73	151	19	229
981	0.0004609	85	147	19	209
982	0.0004928	106	157	17	208
983	0.0005263	73	145	13	217
984	0.000507	58	136	16	214
985	0.0004977	74	136	18	198
986	0.0004973	73	148	16	223
987	0.0004625	52	126	16	200
988	0.0004731	89	154	18	219
989	0.0004511	61	131	16	201
990	0.0004857	52	142	19	232
991	0.0004506	81	136	13	191
992	0.0004734	91	148	12	205
993	0.0004813	86	145	16	204
994	0.0004432	46	129	13	212
995	0.000493	120	153	16	186
996	0.0004861	25	131	19	237
997	0.0004606	57	139	19	221
998	0.0004911	50	146	15	242
999	0.0005588	133	160	18	187
mean	0.000486554	71.139	140.546	16.126	209.953
