# Supplementary material
Source: ML conference proceedings conference paper supplement (https://openreview.net/forum?id=2rAiDBJgR_)
Supplement: supplementary_material [file UD_size-30_test.xlsx]

## Sheet: GS_MaleOpt
	time	SEq	Bal	Reg	Egal
0	0.0001639	339	387	29	435
1	0.0001794	248	321	23	394
2	0.0001893	329	373	25	417
3	0.0002018	205	315	18	425
4	0.0001738	347	393	28	439
5	0.0001728	306	345	24	384
6	0.0001854	279	356	29	433
7	0.0001713	299	364	28	429
8	0.0002072	214	311	25	408
9	0.0001817	285	356	25	427
10	0.0001817	293	369	25	445
11	0.0002289	276	367	25	458
12	0.0001913	309	359	24	409
13	0.0002256	289	367	29	445
14	0.0002007	293	352	29	411
15	0.0001885	224	337	23	450
16	0.0001777	278	367	26	456
17	0.0001694	335	378	29	421
18	0.0001839	246	334	23	422
19	0.0001854	279	355	26	431
20	0.0001933	285	350	27	415
21	0.0001751	303	345	23	387
22	0.0001754	294	360	24	426
23	0.0001899	298	373	27	448
24	0.00017	324	383	28	442
25	0.0001959	253	348	27	443
26	0.0001834	297	356	24	415
27	0.0001712	301	347	23	393
28	0.0001773	275	357	28	439
29	0.0001724	319	370	23	421
30	0.0001854	283	352	27	421
31	0.0001846	259	352	25	445
32	0.0001807	283	359	29	435
33	0.0002026	258	334	23	410
34	0.0001958	200	314	29	428
35	0.0001799	232	323	29	414
36	0.0001735	257	321	26	385
37	0.000187	220	324	20	428
38	0.0002243	233	360	28	487
39	0.0001698	332	389	28	446
40	0.0002215	247	321	24	395
41	0.0001867	257	346	20	435
42	0.0001939	219	339	26	459
43	0.0001826	255	328	25	401
44	0.000185	255	348	25	441
45	0.0001741	306	370	25	434
46	0.0001913	220	323	20	426
47	0.0001775	311	381	26	451
48	0.0001683	361	395	28	429
49	0.0001723	282	353	24	424
50	0.0001808	209	320	19	431
51	0.0001805	282	362	29	442
52	0.0002086	247	335	26	423
53	0.0002291	293	371	28	449
54	0.0001992	216	338	29	460
55	0.0001788	297	358	29	419
56	0.0001901	280	350	28	420
57	0.0001812	257	319	26	381
58	0.0002021	238	339	28	440
59	0.0001805	299	369	29	439
60	0.0003978	200	333	23	466
61	0.0002253	284	341	25	398
62	0.0001775	320	366	29	412
63	0.0002014	189	309	29	429
64	0.0002089	271	339	20	407
65	0.0001895	341	391	29	441
66	0.0001793	334	386	29	438
67	0.0001798	312	398	25	484
68	0.0001745	236	314	29	392
69	0.0001722	247	328	18	409
70	0.0001829	252	346	26	440
71	0.0001678	321	364	29	407
72	0.0001797	361	403	24	445
73	0.000178	320	382	27	444
74	0.0001967	248	331	26	414
75	0.0001877	232	322	20	412
76	0.0001704	298	352	22	406
77	0.0001806	369	421	29	473
78	0.000179	277	346	25	415
79	0.0001726	270	337	26	404
80	0.0002057	316	366	23	416
81	0.0001862	250	343	23	436
82	0.0001823	259	329	23	399
83	0.0001896	223	319	21	415
84	0.0001934	218	316	23	414
85	0.0001788	275	359	25	443
86	0.0001926	274	345	26	416
87	0.0001921	263	350	24	437
88	0.0001936	245	328	25	411
89	0.0001847	336	383	28	430
90	0.0001856	313	367	22	421
91	0.0001884	262	351	23	440
92	0.000198	313	383	28	453
93	0.0001762	277	338	23	399
94	0.0001849	302	349	28	396
95	0.000173	296	353	28	410
96	0.0002275	249	348	21	447
97	0.0001824	267	344	27	421
98	0.0001721	302	370	27	438
99	0.0001855	256	338	24	420
100	0.0001948	222	320	20	418
101	0.0001918	270	369	25	468
102	0.0001687	341	388	29	435
103	0.0001806	224	322	27	420
104	0.0001991	226	348	29	470
105	0.0001793	290	365	28	440
106	0.0001947	339	400	28	461
107	0.0001777	281	367	29	453
108	0.0001843	270	346	25	422
109	0.0002315	274	353	23	432
110	0.0001792	306	371	29	436
111	0.0001751	333	387	28	441
112	0.0001667	349	393	29	437
113	0.0001966	221	331	22	441
114	0.0002252	250	322	21	394
115	0.0001747	313	368	23	423
116	0.0002145	240	350	28	460
117	0.0001721	305	370	23	435
118	0.0002034	291	361	26	431
119	0.0001793	284	350	27	416
120	0.0001717	277	341	29	405
121	0.0002135	295	360	29	425
122	0.0001957	298	365	26	432
123	0.0001855	295	371	27	447
124	0.0001758	335	390	25	445
125	0.000172	337	384	29	431
126	0.0001942	253	348	28	443
127	0.0002469	201	322	24	443
128	0.0001944	221	338	22	455
129	0.0001776	269	350	29	431
130	0.0001705	248	316	22	384
131	0.0001816	274	361	21	448
132	0.0001796	280	372	27	464
133	0.0002024	183	296	23	409
134	0.0001809	301	368	27	435
135	0.0001921	303	381	26	459
136	0.000181	270	329	22	388
137	0.0001761	306	373	28	440
138	0.0001744	310	363	28	416
139	0.0002023	282	341	26	400
140	0.0001971	313	366	24	419
141	0.0001842	306	360	25	414
142	0.0001705	359	397	27	435
143	0.0001873	286	375	25	464
144	0.0001791	295	360	20	425
145	0.0001686	332	392	28	452
146	0.0002167	264	345	27	426
147	0.0001676	314	370	27	426
148	0.0001836	241	341	25	441
149	0.0002099	216	337	24	458
150	0.0001643	339	391	27	443
151	0.0001925	273	335	28	397
152	0.000175	256	332	22	408
153	0.0001759	302	376	29	450
154	0.0001762	283	368	28	453
155	0.00017	302	369	28	436
156	0.0001827	251	340	28	429
157	0.0001979	264	347	26	430
158	0.0001742	260	329	20	398
159	0.0001838	268	345	29	422
160	0.000201	242	340	28	438
161	0.0001993	257	351	24	445
162	0.0002018	295	364	29	433
163	0.000188	274	336	25	398
164	0.0001844	310	381	28	452
165	0.0001958	269	343	24	417
166	0.0002017	275	342	25	409
167	0.0001849	236	334	25	432
168	0.0001798	272	348	26	424
169	0.0001825	282	359	27	436
170	0.0001781	311	367	27	423
171	0.0001821	284	371	29	458
172	0.0001792	273	352	26	431
173	0.0001741	338	382	26	426
174	0.0001932	292	351	24	410
175	0.0001779	251	331	25	411
176	0.0001784	288	335	18	382
177	0.0002271	259	339	27	419
178	0.0001937	274	369	26	464
179	0.0001889	292	365	29	438
180	0.0001845	296	368	25	440
181	0.0001773	301	359	26	417
182	0.0001935	194	308	25	422
183	0.0001688	297	350	28	403
184	0.0001896	265	352	24	439
185	0.0001692	299	357	28	415
186	0.0001716	332	386	26	440
187	0.0001734	309	378	24	447
188	0.0001965	349	394	25	439
189	0.0001832	267	347	24	427
190	0.0001761	289	357	27	425
191	0.0001711	306	364	27	422
192	0.0002075	181	324	22	467
193	0.0001756	302	378	27	454
194	0.0001716	331	393	28	455
195	0.0002091	363	404	28	445
196	0.0001993	181	316	20	451
197	0.0001673	333	383	24	433
198	0.0002166	283	339	23	395
199	0.0001855	240	346	25	452
200	0.0001807	305	369	26	433
201	0.0001849	255	346	27	437
202	0.0001759	296	361	29	426
203	0.000181	269	343	25	417
204	0.0001693	308	367	25	426
205	0.0001833	279	346	28	413
206	0.0001931	262	358	29	454
207	0.0001983	329	368	26	407
208	0.0001886	282	356	26	430
209	0.0001797	343	381	29	419
210	0.0001719	308	371	28	434
211	0.0001743	350	398	28	446
212	0.0001759	263	356	29	449
213	0.0001869	274	351	27	428
214	0.0001855	315	381	25	447
215	0.0001821	288	358	26	428
216	0.0001987	219	335	27	451
217	0.0001771	243	325	25	407
218	0.000196	243	332	22	421
219	0.0001715	317	356	28	395
220	0.00017	297	361	26	425
221	0.000176	314	359	27	404
222	0.0001906	311	386	28	461
223	0.0002167	254	334	20	414
224	0.0001839	334	379	23	424
225	0.0001985	257	331	22	405
226	0.0001677	303	331	22	359
227	0.0001877	269	330	25	391
228	0.0002306	170	306	25	442
229	0.000176	312	373	25	434
230	0.0001937	279	344	21	409
231	0.0001828	293	349	29	405
232	0.0001861	222	324	26	426
233	0.0002091	332	379	27	426
234	0.0001947	207	305	20	403
235	0.0001985	253	326	23	399
236	0.0002062	236	328	24	420
237	0.0002033	299	366	25	433
238	0.0001754	290	347	23	404
239	0.0001649	353	405	27	457
240	0.0001985	285	357	27	429
241	0.0001742	298	357	28	416
242	0.000166	324	373	28	422
243	0.0001839	245	328	22	411
244	0.0001838	401	427	29	453
245	0.0001919	215	329	25	443
246	0.0001696	265	330	29	395
247	0.0002178	330	389	26	448
248	0.0001675	349	386	27	423
249	0.0001842	242	348	26	454
250	0.000194	191	327	27	463
251	0.0001718	359	408	27	457
252	0.0002083	326	368	29	410
253	0.0001798	371	412	26	453
254	0.000176	283	354	26	425
255	0.000201	224	330	28	436
256	0.000193	306	365	23	424
257	0.0001982	186	309	25	432
258	0.0002172	291	359	29	427
259	0.0002569	251	343	23	435
260	0.000188	304	375	27	446
261	0.0001765	277	359	26	441
262	0.0001832	290	356	23	422
263	0.000247	270	347	28	424
264	0.0001944	267	354	28	441
265	0.0001964	285	367	26	449
266	0.0001865	266	355	24	444
267	0.0001847	287	371	26	455
268	0.0001994	241	346	23	451
269	0.0002417	206	313	20	420
270	0.0001914	264	347	25	430
271	0.0001802	288	352	26	416
272	0.0001744	297	364	29	431
273	0.0002178	339	416	29	493
274	0.000177	288	347	23	406
275	0.0002041	405	434	28	463
276	0.0001779	305	384	29	463
277	0.0001908	290	345	25	400
278	0.0003201	339	387	26	435
279	0.0001702	292	346	23	400
280	0.0002446	265	339	28	413
281	0.0001929	190	317	19	444
282	0.0001667	323	389	23	455
283	0.0001757	253	339	24	425
284	0.0002077	284	344	29	404
285	0.000174	266	354	23	442
286	0.0002219	274	343	28	412
287	0.0002066	232	350	27	468
288	0.0001897	292	360	22	428
289	0.0001709	334	381	28	428
290	0.0001813	300	379	28	458
291	0.0001639	324	363	27	402
292	0.0001714	342	398	28	454
293	0.0001713	334	387	29	440
294	0.0001804	290	365	29	440
295	0.0001695	324	367	28	410
296	0.0001756	299	362	26	425
297	0.000177	365	412	28	459
298	0.0001841	254	328	21	402
299	0.0001875	245	334	27	423
300	0.000179	299	379	29	459
301	0.0001916	183	327	27	471
302	0.0001877	279	364	22	449
303	0.0001623	326	365	25	404
304	0.0002077	196	333	22	470
305	0.0001811	259	342	25	425
306	0.0001787	276	358	27	440
307	0.0001753	313	376	27	439
308	0.0001626	346	374	29	402
309	0.0002531	240	312	21	384
310	0.0001901	266	356	27	446
311	0.0001769	296	362	26	428
312	0.0001755	333	372	27	411
313	0.000189	269	354	25	439
314	0.0001804	261	346	23	431
315	0.0002031	240	316	25	392
316	0.0001888	252	321	26	390
317	0.0001757	262	326	26	390
318	0.000163	309	350	26	391
319	0.0001906	252	339	28	426
320	0.0001826	278	357	25	436
321	0.0001914	210	318	26	426
322	0.0001827	254	337	23	420
323	0.0001957	302	368	27	434
324	0.0002523	209	327	27	445
325	0.0001926	240	348	24	456
326	0.0002169	193	328	24	463
327	0.00017	333	372	26	411
328	0.0001811	220	314	27	408
329	0.000182	324	387	29	450
330	0.0001875	255	347	23	439
331	0.0001715	343	393	24	443
332	0.000192	280	356	28	432
333	0.0001766	306	367	23	428
334	0.0001706	306	367	29	428
335	0.0001793	282	358	26	434
336	0.0001821	300	360	23	420
337	0.0001788	338	400	27	462
338	0.000171	301	373	27	445
339	0.0001712	309	360	24	411
340	0.0001735	283	359	28	435
341	0.0002016	316	370	27	424
342	0.0001736	311	359	26	407
343	0.0001808	308	368	28	428
344	0.0001891	261	355	27	449
345	0.0001817	266	348	27	430
346	0.0001928	303	388	29	473
347	0.0001705	325	382	29	439
348	0.0002325	334	383	29	432
349	0.0001669	305	363	27	421
350	0.0001793	281	364	29	447
351	0.0001836	287	371	25	455
352	0.0001891	319	379	28	439
353	0.0001918	195	305	22	415
354	0.0001716	270	327	19	384
355	0.0001835	312	363	23	414
356	0.0001915	321	388	29	455
357	0.0001944	312	376	25	440
358	0.0002169	240	321	25	402
359	0.0001724	359	401	29	443
360	0.0001917	211	333	26	455
361	0.0001811	279	353	26	427
362	0.0001996	323	371	24	419
363	0.0001723	331	371	27	411
364	0.0002292	275	368	27	461
365	0.0001859	246	339	28	432
366	0.0001776	224	318	19	412
367	0.000234	222	325	27	428
368	0.000178	342	382	27	422
369	0.0001874	292	377	24	462
370	0.000201	240	342	23	444
371	0.0001754	284	356	28	428
372	0.0001782	331	395	29	459
373	0.0001759	243	341	29	439
374	0.0001889	339	399	28	459
375	0.0001944	343	380	29	417
376	0.0001874	370	399	26	428
377	0.0002079	261	352	29	443
378	0.0001731	278	338	29	398
379	0.0001675	324	374	29	424
380	0.0001679	316	353	25	390
381	0.0001751	318	369	25	420
382	0.0001742	287	354	29	421
383	0.0001776	343	397	28	451
384	0.0001779	337	389	24	441
385	0.0002149	213	307	27	401
386	0.0001777	360	414	29	468
387	0.0001667	345	388	29	431
388	0.0001797	361	412	27	463
389	0.0001932	199	326	21	453
390	0.0001664	322	368	29	414
391	0.0001721	311	366	27	421
392	0.0001942	291	339	27	387
393	0.0001861	287	360	29	433
394	0.0001844	252	338	28	424
395	0.0001802	274	363	22	452
396	0.0001723	275	341	27	407
397	0.000185	319	374	25	429
398	0.0002124	224	329	21	434
399	0.0002059	282	372	28	462
400	0.0001761	293	364	28	435
401	0.0001736	282	336	24	390
402	0.000181	296	380	28	464
403	0.000199	224	310	19	396
404	0.0001945	220	321	26	422
405	0.0002309	322	384	27	446
406	0.0001759	281	351	23	421
407	0.0002079	286	343	25	400
408	0.0001941	197	324	22	451
409	0.0002489	256	331	22	406
410	0.0001759	308	364	23	420
411	0.0001886	247	343	26	439
412	0.0001962	210	333	26	456
413	0.0001811	277	342	25	407
414	0.0001841	210	315	24	420
415	0.0002287	226	324	22	422
416	0.0001747	310	365	26	420
417	0.0001676	361	391	29	421
418	0.0001858	294	357	25	420
419	0.0001802	295	365	29	435
420	0.0001774	259	335	25	411
421	0.0001913	344	388	28	432
422	0.0002051	320	369	27	418
423	0.0001963	278	354	24	430
424	0.0001674	357	393	29	429
425	0.0001921	237	338	20	439
426	0.0002135	228	332	23	436
427	0.0002084	301	372	29	443
428	0.0002004	192	326	24	460
429	0.0001786	374	419	27	464
430	0.0002098	301	379	29	457
431	0.0001788	261	344	25	427
432	0.000187	219	328	26	437
433	0.000187	290	368	28	446
434	0.0001711	294	358	26	422
435	0.0001876	300	381	28	462
436	0.000165	324	379	24	434
437	0.0001797	310	354	28	398
438	0.0002132	308	358	26	408
439	0.0002001	311	370	27	429
440	0.0001832	216	315	23	414
441	0.000216	292	368	27	444
442	0.0001659	330	387	26	444
443	0.0001674	329	390	24	451
444	0.0001846	313	379	25	445
445	0.0001882	254	348	26	442
446	0.0001711	287	354	25	421
447	0.0001914	251	334	28	417
448	0.0001723	252	345	25	438
449	0.0001762	307	367	27	427
450	0.0001731	309	385	29	461
451	0.0001823	318	379	26	440
452	0.0002269	208	331	27	454
453	0.0001592	398	430	29	462
454	0.0001703	367	403	27	439
455	0.0002464	202	348	25	494
456	0.0001804	302	373	26	444
457	0.0001842	234	339	22	444
458	0.0002033	342	390	27	438
459	0.0001727	263	330	26	397
460	0.0002079	287	360	28	433
461	0.0001736	281	353	25	425
462	0.0001806	210	305	22	400
463	0.0001834	264	356	27	448
464	0.0001951	242	344	24	446
465	0.0001865	200	286	18	372
466	0.0001902	168	296	18	424
467	0.0002064	240	316	22	392
468	0.0001893	287	353	28	419
469	0.0001863	304	374	25	444
470	0.0002041	279	353	28	427
471	0.0001761	359	395	27	431
472	0.0002001	296	353	28	410
473	0.0001902	268	345	24	422
474	0.0001741	279	359	24	439
475	0.000178	291	366	23	441
476	0.0001852	253	335	24	417
477	0.0001652	353	395	29	437
478	0.0001942	201	319	25	437
479	0.0001733	282	362	25	442
480	0.0002008	307	373	28	439
481	0.000178	246	341	26	436
482	0.0001905	215	326	24	437
483	0.0001762	300	357	28	414
484	0.0001826	317	372	28	427
485	0.0001639	363	397	29	431
486	0.0002178	272	353	26	434
487	0.0001777	295	365	27	435
488	0.0001922	261	354	23	447
489	0.0001786	262	344	24	426
490	0.0001972	244	355	28	466
491	0.0002009	290	362	28	434
492	0.0001785	322	376	29	430
493	0.0001999	265	349	28	433
494	0.0002471	278	347	26	416
495	0.0001764	314	379	27	444
496	0.0001904	226	328	29	430
497	0.0001727	300	365	21	430
498	0.0001847	308	386	29	464
499	0.0001865	293	376	25	459
500	0.0001771	294	368	26	442
501	0.0001753	358	408	29	458
502	0.0001979	240	328	26	416
503	0.0002301	229	340	28	451
504	0.0001897	244	328	29	412
505	0.0001797	338	368	25	398
506	0.0001634	315	360	29	405
507	0.0001884	272	353	28	434
508	0.0001951	338	390	26	442
509	0.0001778	257	325	25	393
510	0.0001841	239	320	22	401
511	0.0003355	308	361	28	414
512	0.0001819	276	353	25	430
513	0.0001904	273	360	27	447
514	0.0001879	217	333	28	449
515	0.0001695	353	388	27	423
516	0.0002239	277	346	28	415
517	0.0001857	227	343	21	459
518	0.0001762	266	333	24	400
519	0.0001803	309	381	23	453
520	0.0001803	282	350	20	418
521	0.0001913	303	364	26	425
522	0.0001963	305	393	26	481
523	0.0001926	226	341	26	456
524	0.0002217	320	360	26	400
525	0.0001744	270	344	24	418
526	0.0001745	308	352	29	396
527	0.0001874	221	327	24	433
528	0.0001812	281	367	28	453
529	0.0001732	300	370	27	440
530	0.0001999	203	341	21	479
531	0.0001848	251	338	20	425
532	0.0001745	342	396	29	450
533	0.0001792	266	351	24	436
534	0.0001685	340	390	29	440
535	0.0001776	282	357	25	432
536	0.0002224	245	337	23	429
537	0.0001761	408	446	27	484
538	0.0001715	291	370	24	449
539	0.0001861	281	366	23	451
540	0.0001837	297	360	29	423
541	0.0001709	371	422	29	473
542	0.0001731	289	361	25	433
543	0.0002025	312	355	24	398
544	0.0001972	245	347	23	449
545	0.0001825	276	357	25	438
546	0.000179	371	414	26	457
547	0.0001952	192	291	21	390
548	0.0001875	240	338	27	436
549	0.0002043	281	360	26	439
550	0.0001942	249	356	24	463
551	0.0001841	278	354	27	430
552	0.0002018	208	313	23	418
553	0.0001857	284	353	24	422
554	0.0002439	252	342	27	432
555	0.0001939	236	333	28	430
556	0.0001821	362	390	29	418
557	0.0001923	238	331	29	424
558	0.0001968	294	388	27	482
559	0.0001858	296	376	27	456
560	0.000182	266	355	22	444
561	0.0001725	293	369	28	445
562	0.0001813	360	412	28	464
563	0.0001846	278	345	25	412
564	0.0001694	266	332	27	398
565	0.0001898	304	357	26	410
566	0.0001791	315	384	28	453
567	0.0001781	319	382	29	445
568	0.0001685	339	392	26	445
569	0.0001816	243	335	24	427
570	0.0001927	190	287	19	384
571	0.0001809	303	359	26	415
572	0.0001828	291	358	27	425
573	0.0001721	352	408	24	464
574	0.0001869	244	339	26	434
575	0.0001849	246	328	19	410
576	0.000183	338	394	29	450
577	0.0001826	216	335	27	454
578	0.0001801	301	371	27	441
579	0.0001768	328	380	28	432
580	0.0002117	239	328	29	417
581	0.0001787	301	371	28	441
582	0.0001717	306	363	24	420
583	0.0002385	245	352	23	459
584	0.0001775	286	364	25	442
585	0.0001838	305	367	26	429
586	0.0001878	302	361	29	420
587	0.0001626	331	376	25	421
588	0.0001842	270	357	29	444
589	0.0002175	311	371	29	431
590	0.0001719	339	391	28	443
591	0.0001809	278	340	25	402
592	0.0001739	322	378	29	434
593	0.0001687	364	406	29	448
594	0.0001982	235	328	29	421
595	0.0001813	240	320	27	400
596	0.0001922	286	348	28	410
597	0.0001875	252	344	28	436
598	0.0001627	341	395	29	449
599	0.0001713	334	389	28	444
600	0.0001737	307	375	26	443
601	0.0001728	279	331	22	383
602	0.0001929	330	384	28	438
603	0.0001792	325	378	28	431
604	0.00019	321	370	26	419
605	0.0001753	296	367	25	438
606	0.0001759	288	356	29	424
607	0.0001772	329	379	25	429
608	0.0001766	262	341	29	420
609	0.0002053	205	324	21	443
610	0.0001736	291	357	29	423
611	0.0001914	204	316	20	428
612	0.0001753	310	357	26	404
613	0.0001811	265	349	27	433
614	0.0001955	261	350	26	439
615	0.0001788	294	365	28	436
616	0.0002	304	362	25	420
617	0.0001986	338	398	28	458
618	0.000195	276	356	26	436
619	0.0001806	239	336	25	433
620	0.0001757	263	335	29	407
621	0.0001698	274	343	25	412
622	0.0001751	229	329	26	429
623	0.0001839	326	370	26	414
624	0.0002053	234	333	26	432
625	0.0001718	272	342	29	412
626	0.0001839	267	330	19	393
627	0.0002003	242	348	22	454
628	0.0001839	323	377	27	431
629	0.0001695	356	391	27	426
630	0.0001825	270	359	26	448
631	0.0001837	283	362	28	441
632	0.0001641	248	320	26	392
633	0.000162	363	386	27	409
634	0.0001853	208	331	23	454
635	0.0002111	328	402	28	476
636	0.0002737	347	394	28	441
637	0.0001741	312	379	28	446
638	0.0001934	243	335	23	427
639	0.0001903	266	349	25	432
640	0.0001626	302	365	29	428
641	0.0002027	317	365	29	413
642	0.0001731	293	370	26	447
643	0.0001773	361	403	27	445
644	0.0001745	317	361	29	405
645	0.0001969	231	328	23	425
646	0.0001678	369	408	26	447
647	0.0002033	354	403	25	452
648	0.0001783	270	341	26	412
649	0.0002062	195	333	29	471
650	0.0001771	300	352	20	404
651	0.0001902	311	380	28	449
652	0.0001857	214	317	23	420
653	0.0001754	314	366	25	418
654	0.0001815	341	399	28	457
655	0.0001759	284	356	22	428
656	0.0002023	317	377	27	437
657	0.0001949	247	343	23	439
658	0.0001764	307	357	26	407
659	0.0001927	199	331	21	463
660	0.0001741	306	373	21	440
661	0.0001792	259	339	23	419
662	0.0002115	208	323	22	438
663	0.0001792	342	399	29	456
664	0.0001816	280	363	26	446
665	0.0001693	271	342	24	413
666	0.0001741	270	345	27	420
667	0.0001792	195	297	21	399
668	0.0002036	300	367	25	434
669	0.0001683	284	352	27	420
670	0.0001944	241	319	21	397
671	0.0001757	323	378	29	433
672	0.0002015	173	312	24	451
673	0.0001683	367	409	28	451
674	0.0001671	316	369	28	422
675	0.0001644	357	400	29	443
676	0.0001988	254	347	24	440
677	0.000169	289	354	29	419
678	0.000177	257	340	21	423
679	0.0001836	261	354	26	447
680	0.0001832	306	392	26	478
681	0.0001681	299	352	24	405
682	0.0001792	296	378	27	460
683	0.0002137	290	362	24	434
684	0.0002392	296	383	27	470
685	0.000187	299	361	22	423
686	0.0001937	246	341	27	436
687	0.0001719	298	364	27	430
688	0.0001974	277	353	27	429
689	0.0001741	239	317	19	395
690	0.000173	270	356	29	442
691	0.0001784	296	354	28	412
692	0.0001788	273	349	26	425
693	0.0002542	270	354	28	438
694	0.0001804	275	357	29	439
695	0.0001954	330	394	28	458
696	0.0002039	308	363	27	418
697	0.0001722	301	371	28	441
698	0.0002002	216	335	23	454
699	0.0002461	231	356	22	481
700	0.0001727	353	393	28	433
701	0.0001875	255	338	26	421
702	0.0001706	320	369	27	418
703	0.0001691	271	330	22	389
704	0.0001762	273	357	25	441
705	0.0001805	270	356	27	442
706	0.0001764	305	378	26	451
707	0.0002098	367	415	28	463
708	0.0001833	297	375	25	453
709	0.0001668	337	398	29	459
710	0.0001883	327	400	28	473
711	0.0001782	304	371	24	438
712	0.0002403	222	334	27	446
713	0.0001926	234	332	27	430
714	0.0001767	293	352	28	411
715	0.000174	371	406	29	441
716	0.0001814	308	370	26	432
717	0.0002063	191	309	19	427
718	0.0001946	196	330	28	464
719	0.0001815	218	331	26	444
720	0.0001814	306	362	29	418
721	0.0001781	234	324	21	414
722	0.0001831	259	343	28	427
723	0.0002061	324	380	26	436
724	0.000208	230	335	25	440
725	0.0001986	155	317	29	479
726	0.0001736	320	372	29	424
727	0.0001821	282	357	23	432
728	0.0001707	296	363	25	430
729	0.0001985	246	333	23	420
730	0.0001763	261	339	25	417
731	0.000195	217	321	21	425
732	0.00019	301	370	29	439
733	0.0001983	256	332	27	408
734	0.0001969	200	313	26	426
735	0.0001946	317	368	28	419
736	0.0001743	321	375	28	429
737	0.0001675	325	374	27	423
738	0.0001721	260	338	28	416
739	0.0002249	237	343	23	449
740	0.0001962	208	316	22	424
741	0.0001803	304	351	24	398
742	0.0001885	298	365	24	432
743	0.0001771	299	381	29	463
744	0.0001873	287	355	24	423
745	0.0001933	180	303	21	426
746	0.0001784	263	330	23	397
747	0.0001832	220	313	17	406
748	0.0001733	313	371	27	429
749	0.0001829	308	392	28	476
750	0.0001741	347	389	29	431
751	0.0001754	294	355	27	416
752	0.0001878	272	366	27	460
753	0.0002419	289	361	25	433
754	0.0001995	295	350	26	405
755	0.0001811	321	388	28	455
756	0.0002049	211	324	24	437
757	0.000165	359	405	28	451
758	0.0002069	190	310	28	430
759	0.0001949	232	327	25	422
760	0.0001668	301	347	28	393
761	0.0001748	286	343	24	400
762	0.000182	313	365	29	417
763	0.0001936	289	363	26	437
764	0.0002796	279	339	27	399
765	0.0001682	257	312	27	367
766	0.0001719	322	383	28	444
767	0.0001976	340	414	28	488
768	0.0002084	263	343	27	423
769	0.0001727	317	377	29	437
770	0.0001957	285	367	29	449
771	0.0001737	230	312	22	394
772	0.0001736	342	380	27	418
773	0.0001803	270	333	25	396
774	0.0001708	331	390	27	449
775	0.0001858	270	347	28	424
776	0.0001728	250	326	25	402
777	0.0002012	210	325	25	440
778	0.0001908	191	323	25	455
779	0.0002306	220	328	23	436
780	0.0001697	351	391	26	431
781	0.0001812	335	396	29	457
782	0.0002048	210	336	29	462
783	0.0001716	287	365	26	443
784	0.0001621	320	362	26	404
785	0.0002001	159	319	27	479
786	0.0001768	265	347	28	429
787	0.000172	273	341	25	409
788	0.0001885	326	377	29	428
789	0.0002082	279	355	27	431
790	0.0001884	304	368	28	432
791	0.0001761	301	354	24	407
792	0.0001688	312	379	24	446
793	0.0001914	236	344	29	452
794	0.0002753	247	360	23	473
795	0.0001712	283	353	20	423
796	0.0001947	177	324	23	471
797	0.000178	289	351	27	413
798	0.000171	280	352	23	424
799	0.0001777	311	373	29	435
800	0.000214	227	332	25	437
801	0.0001722	307	380	27	453
802	0.0001719	285	360	26	435
803	0.0001979	342	398	27	454
804	0.0001744	271	352	25	433
805	0.000178	255	328	19	401
806	0.0001983	272	371	25	470
807	0.0002038	339	388	27	437
808	0.0001686	308	363	26	418
809	0.0001899	323	388	28	453
810	0.0001776	272	349	29	426
811	0.0001748	312	379	28	446
812	0.0001986	242	328	28	414
813	0.0002105	294	348	27	402
814	0.0002004	279	352	22	425
815	0.0001715	270	344	26	418
816	0.0001851	255	338	27	421
817	0.0001965	210	311	24	412
818	0.0002727	207	329	21	451
819	0.0001941	382	402	24	422
820	0.0001709	319	375	25	431
821	0.0001991	316	378	27	440
822	0.0002006	270	341	21	412
823	0.0001712	339	389	25	439
824	0.0001874	336	388	29	440
825	0.0001696	287	348	25	409
826	0.0001841	279	352	22	425
827	0.000164	342	384	26	426
828	0.0001805	281	370	29	459
829	0.0001732	301	357	24	413
830	0.0001952	243	365	24	487
831	0.0001673	284	340	25	396
832	0.0002162	342	388	29	434
833	0.0001929	264	345	23	426
834	0.0001805	274	334	22	394
835	0.0001848	273	339	28	405
836	0.0001908	241	357	25	473
837	0.000225	297	362	29	427
838	0.0001802	246	343	29	440
839	0.0001833	282	346	28	410
840	0.0001775	325	398	29	471
841	0.0002144	361	393	29	425
842	0.0001886	245	346	29	447
843	0.0001854	238	327	24	416
844	0.0001851	323	368	26	413
845	0.0001745	289	354	27	419
846	0.000181	277	335	28	393
847	0.0002314	338	380	29	422
848	0.0001826	227	322	25	417
849	0.0001889	302	375	27	448
850	0.0001732	299	366	26	433
851	0.0002017	277	361	28	445
852	0.0001872	253	349	27	445
853	0.000176	297	347	27	397
854	0.0001761	328	373	27	418
855	0.0001899	305	376	29	447
856	0.0001844	326	366	27	406
857	0.0001856	222	336	27	450
858	0.0001766	291	355	25	419
859	0.0001803	341	398	26	455
860	0.0002293	307	388	27	469
861	0.0002391	304	372	26	440
862	0.0001699	342	400	27	458
863	0.0001673	272	346	27	420
864	0.0001867	264	354	26	444
865	0.0002085	258	372	28	486
866	0.0001859	331	382	26	433
867	0.0001802	274	364	24	454
868	0.0002563	286	359	26	432
869	0.0001974	289	339	28	389
870	0.0001885	324	385	27	446
871	0.0002145	243	325	22	407
872	0.0001786	258	345	27	432
873	0.0001793	304	363	27	422
874	0.0002023	269	361	27	453
875	0.0002375	223	335	27	447
876	0.0001878	315	390	26	465
877	0.0001808	277	351	28	425
878	0.0002009	323	373	27	423
879	0.0002421	292	370	28	448
880	0.0002763	301	356	28	411
881	0.0001669	276	340	23	404
882	0.0001752	349	398	27	447
883	0.0001887	233	337	28	441
884	0.0001953	268	353	26	438
885	0.0001736	316	370	29	424
886	0.0001906	262	349	24	436
887	0.0001797	334	371	28	408
888	0.0001921	327	362	29	397
889	0.0001783	305	361	29	417
890	0.0002014	282	363	22	444
891	0.0002432	264	332	23	400
892	0.0001878	278	354	25	430
893	0.0002077	197	312	25	427
894	0.0001718	289	370	29	451
895	0.0003343	333	366	26	399
896	0.0001894	233	338	25	443
897	0.0001736	248	326	25	404
898	0.0001727	352	393	26	434
899	0.0002286	233	321	28	409
900	0.0001837	245	336	26	427
901	0.0001778	281	343	28	405
902	0.0001986	258	345	29	432
903	0.0001705	299	359	28	419
904	0.0001939	315	379	29	443
905	0.0001717	315	364	24	413
906	0.0001785	340	378	29	416
907	0.0002149	226	339	28	452
908	0.0001763	280	358	27	436
909	0.0002008	239	331	19	423
910	0.00018	316	371	29	426
911	0.0001712	308	368	27	428
912	0.0001837	244	330	25	416
913	0.0001937	324	392	27	460
914	0.0001841	249	359	28	469
915	0.0001871	230	330	27	430
916	0.0001903	201	303	25	405
917	0.0001728	336	389	26	442
918	0.0002356	330	377	27	424
919	0.0001738	257	323	26	389
920	0.0001979	229	343	29	457
921	0.0001767	325	392	29	459
922	0.0001936	300	374	25	448
923	0.0001727	330	387	28	444
924	0.0002087	320	378	24	436
925	0.000206	245	328	23	411
926	0.0001891	270	355	27	440
927	0.0001774	374	418	28	462
928	0.0001818	298	378	28	458
929	0.0002329	234	334	25	434
930	0.0001767	267	331	23	395
931	0.0002344	294	370	28	446
932	0.0001866	284	380	29	476
933	0.0001693	309	349	25	389
934	0.0001991	203	310	21	417
935	0.0002192	211	315	27	419
936	0.0001899	300	360	27	420
937	0.0002167	338	394	29	450
938	0.0001758	261	334	27	407
939	0.0001837	312	345	26	378
940	0.0002047	291	371	26	451
941	0.0002082	154	331	23	508
942	0.0002002	315	366	27	417
943	0.0001676	317	379	29	441
944	0.0001896	311	390	29	469
945	0.0001819	297	348	28	399
946	0.0001922	234	342	25	450
947	0.0001753	344	389	28	434
948	0.0002116	225	345	25	465
949	0.0001922	197	314	21	431
950	0.000197	290	370	26	450
951	0.0001839	318	366	22	414
952	0.0001701	293	358	23	423
953	0.0002217	304	365	27	426
954	0.0002054	198	334	25	470
955	0.0001854	307	374	27	441
956	0.0002247	251	330	25	409
957	0.0001905	319	373	29	427
958	0.0001978	177	313	27	449
959	0.0002222	239	332	29	425
960	0.0001778	339	383	29	427
961	0.000186	267	348	28	429
962	0.0001922	239	344	29	449
963	0.0002399	297	357	25	417
964	0.000261	345	386	28	427
965	0.0001728	325	381	26	437
966	0.0001658	375	418	28	461
967	0.0001686	286	334	26	382
968	0.0001688	336	393	29	450
969	0.0001633	356	402	26	448
970	0.0001718	220	292	19	364
971	0.0002615	305	350	28	395
972	0.0001893	272	348	23	424
973	0.0002057	308	389	29	470
974	0.000171	313	372	29	431
975	0.0001859	223	329	28	435
976	0.0001749	242	321	24	400
977	0.0001695	270	347	23	424
978	0.0001801	300	381	25	462
979	0.0001965	308	365	27	422
980	0.0001831	330	380	28	430
981	0.0001897	302	379	28	456
982	0.0002137	326	387	28	448
983	0.0001944	247	342	27	437
984	0.0001919	249	348	24	447
985	0.0001913	199	333	23	467
986	0.0002049	226	323	24	420
987	0.0001779	392	429	29	466
988	0.0001693	307	368	29	429
989	0.0002051	274	352	28	430
990	0.0002248	328	386	29	444
991	0.000183	305	372	26	439
992	0.0002231	208	321	22	434
993	0.0001729	302	357	23	412
994	0.0001811	244	329	29	414
995	0.0001868	228	325	18	422
996	0.0002087	335	396	29	457
997	0.0001759	275	352	22	429
998	0.0001675	347	386	25	425
999	0.0002341	273	334	22	395
mean	0.000188896	282.88	356.986	25.929	431.092

## Sheet: GS_FemaleOpt
	time	SEq	Bal	Reg	Egal
0	0.0002786	218	317	26	416
1	0.0002525	131	277	24	423
2	0.0002571	184	331	24	478
3	0.000271	205	315	18	425
4	0.0002462	78	289	27	500
5	0.0002536	209	311	24	413
6	0.0002721	182	308	23	434
7	0.000255	203	339	27	475
8	0.0002379	91	276	26	461
9	0.0002458	223	333	25	443
10	0.000248	210	333	20	456
11	0.0002936	113	293	26	473
12	0.0002362	121	284	28	447
13	0.0002606	111	315	26	519
14	0.0002687	186	312	29	438
15	0.0002509	126	309	28	492
16	0.0003471	222	338	24	454
17	0.0002878	141	295	29	449
18	0.0004086	149	293	19	437
19	0.0002402	159	305	26	451
20	0.0002336	135	298	27	461
21	0.0002625	136	301	23	466
22	0.0002429	125	309	24	493
23	0.0002384	218	328	21	438
24	0.0002434	135	314	23	493
25	0.0002579	166	320	24	474
26	0.0002395	147	297	21	447
27	0.0002722	167	292	27	417
28	0.0002492	187	316	22	445
29	0.0002473	147	315	27	483
30	0.0002767	199	311	25	423
31	0.0002418	142	295	20	448
32	0.0002424	113	310	29	507
33	0.0002603	182	306	19	430
34	0.0002417	186	308	29	430
35	0.0002284	106	283	27	460
36	0.0002702	196	297	23	398
37	0.0002321	129	290	23	451
38	0.0002832	117	309	23	501
39	0.0003016	210	327	20	444
40	0.0002329	93	267	20	441
41	0.0002347	173	314	18	455
42	0.00024	103	311	28	519
43	0.0002339	96	281	22	466
44	0.0002572	204	333	27	462
45	0.0002674	207	333	22	459
46	0.0002383	102	300	27	498
47	0.0003258	213	331	21	449
48	0.0002532	190	309	21	428
49	0.0002523	145	303	26	461
50	0.0002688	139	303	28	467
51	0.0002537	103	288	29	473
52	0.000236	172	287	21	402
53	0.0002429	192	323	25	454
54	0.000239	143	309	27	475
55	0.000266	273	352	27	431
56	0.000245	164	303	21	442
57	0.0002774	140	281	28	422
58	0.0003114	174	315	20	456
59	0.0002445	187	319	25	451
60	0.0002428	135	311	23	487
61	0.0002346	76	275	26	474
62	0.0002497	107	284	29	461
63	0.0002418	189	309	29	429
64	0.0002339	96	298	28	500
65	0.0002365	158	318	25	478
66	0.0002339	161	306	28	451
67	0.0002624	55	290	29	525
68	0.0002389	169	298	29	427
69	0.0002236	101	289	27	477
70	0.0002488	217	328	24	439
71	0.0002971	283	345	29	407
72	0.000239	152	317	29	482
73	0.0002759	251	346	21	441
74	0.0002369	210	318	23	426
75	0.0002702	232	322	20	412
76	0.0002478	185	301	22	417
77	0.0002518	155	326	29	497
78	0.0002258	101	283	23	465
79	0.0002384	142	293	28	444
80	0.000272	265	348	21	431
81	0.0002361	119	305	28	491
82	0.0002497	219	314	20	409
83	0.0002344	143	299	27	455
84	0.0002479	180	304	21	428
85	0.0002565	184	332	29	480
86	0.0002335	106	278	20	450
87	0.0002372	77	288	23	499
88	0.0002465	204	306	18	408
89	0.0002885	206	335	25	464
90	0.0002558	270	347	22	424
91	0.0002387	136	295	22	454
92	0.0004637	150	317	26	484
93	0.0002572	210	320	23	430
94	0.0002332	109	294	29	479
95	0.0002427	116	298	24	480
96	0.0002527	164	323	27	482
97	0.0002544	216	319	23	422
98	0.0002451	120	301	28	482
99	0.000259	165	319	25	473
100	0.0002296	153	299	24	445
101	0.0002352	53	297	25	541
102	0.0002604	142	303	26	464
103	0.0002313	124	292	26	460
104	0.0002599	187	340	29	493
105	0.0002498	201	328	28	455
106	0.0002497	259	358	25	457
107	0.0002506	204	327	26	450
108	0.0002679	180	318	25	456
109	0.0002515	140	321	24	502
110	0.0002486	135	315	28	495
111	0.0002298	102	308	27	514
112	0.0002499	218	315	23	412
113	0.0002305	120	304	27	488
114	0.0002383	165	288	16	411
115	0.0002583	284	356	23	428
116	0.0002431	165	316	26	467
117	0.0002866	218	341	28	464
118	0.0002435	181	311	20	441
119	0.0003105	149	283	25	417
120	0.0002535	260	336	29	412
121	0.0002534	184	309	29	434
122	0.0002485	72	291	24	510
123	0.0002458	129	321	29	513
124	0.0002626	196	333	26	470
125	0.0002771	92	280	25	468
126	0.0002446	142	308	26	474
127	0.0002408	159	311	24	463
128	0.0002733	100	304	27	508
129	0.0002902	209	314	19	419
130	0.0002409	165	292	24	419
131	0.0002768	205	321	27	437
132	0.0002443	226	345	20	464
133	0.0002497	130	287	25	444
134	0.0002528	151	306	26	461
135	0.0002658	193	325	19	457
136	0.000235	167	303	26	439
137	0.0002699	123	287	28	451
138	0.0002552	196	323	24	450
139	0.0002916	210	323	24	436
140	0.0002449	44	300	28	556
141	0.0002759	258	328	18	398
142	0.000243	157	318	24	479
143	0.0002709	157	329	28	501
144	0.0002988	194	339	26	484
145	0.0002339	83	290	27	497
146	0.0002511	219	315	20	411
147	0.0002339	181	313	22	445
148	0.0002881	213	336	25	459
149	0.0002645	200	328	24	456
150	0.0002563	225	350	26	475
151	0.0002445	188	312	28	436
152	0.0002424	135	297	25	459
153	0.0002462	164	317	29	470
154	0.0002294	91	299	23	507
155	0.0002409	153	300	28	447
156	0.0002463	128	304	28	480
157	0.0002502	167	323	29	479
158	0.0002333	116	297	23	478
159	0.0002933	156	309	27	462
160	0.0002841	157	303	26	449
161	0.0002961	160	328	25	496
162	0.0002488	141	305	28	469
163	0.0002358	237	319	23	401
164	0.0002585	275	365	25	455
165	0.0002449	104	284	28	464
166	0.000238	146	296	23	446
167	0.000249	222	325	23	428
168	0.0002548	206	328	24	450
169	0.0002442	190	316	23	442
170	0.0002468	78	296	28	514
171	0.0002486	218	338	20	458
172	0.0002488	113	297	23	481
173	0.0002479	201	319	26	437
174	0.0002339	144	291	22	438
175	0.0002399	157	313	29	469
176	0.0002393	207	317	19	427
177	0.0002531	259	339	27	419
178	0.0002471	161	330	29	499
179	0.0002315	113	298	28	483
180	0.0002498	168	306	21	444
181	0.0002541	281	344	26	407
182	0.0002474	164	302	25	440
183	0.0002391	150	281	19	412
184	0.0002395	97	299	26	501
185	0.0002349	149	293	23	437
186	0.0003018	169	320	27	471
187	0.0002459	170	330	28	490
188	0.0002481	211	328	22	445
189	0.0002612	213	332	24	451
190	0.0002433	164	310	25	456
191	0.0002592	278	350	23	422
192	0.0002427	167	317	22	467
193	0.0002767	155	323	28	491
194	0.0002412	92	302	27	512
195	0.0002438	112	324	28	536
196	0.0002513	170	312	20	454
197	0.0003385	64	292	28	520
198	0.0002377	184	306	19	428
199	0.0002316	72	296	29	520
200	0.0002387	151	315	28	479
201	0.0002477	150	307	25	464
202	0.0002388	166	313	26	460
203	0.0003115	121	303	29	485
204	0.0002517	189	325	22	461
205	0.0002251	89	284	29	479
206	0.0002618	262	358	29	454
207	0.0002967	102	305	29	508
208	0.0002431	164	308	28	452
209	0.0002565	228	323	26	418
210	0.000268	142	301	22	460
211	0.0002354	17	287	29	557
212	0.0002437	158	318	24	478
213	0.0002624	163	330	29	497
214	0.00024	162	322	27	482
215	0.0002868	219	335	28	451
216	0.0002582	192	326	28	460
217	0.0002457	109	276	27	443
218	0.0002729	221	323	20	425
219	0.0002775	156	318	25	480
220	0.0002339	105	293	28	481
221	0.00026	104	302	26	500
222	0.0002378	72	293	29	514
223	0.0002545	190	307	19	424
224	0.000234	45	278	27	511
225	0.0002851	190	304	22	418
226	0.0002664	244	316	21	388
227	0.0002507	238	310	20	382
228	0.0002431	170	306	25	442
229	0.0002506	165	314	24	463
230	0.0002438	89	300	22	511
231	0.0002795	215	314	24	413
232	0.0002458	146	302	25	458
233	0.0002471	122	317	28	512
234	0.0002357	139	293	22	447
235	0.0002427	174	304	22	434
236	0.0002387	149	302	27	455
237	0.000265	299	366	25	433
238	0.0002394	180	314	29	448
239	0.0002535	173	329	28	485
240	0.0002461	188	314	21	440
241	0.0002389	193	314	28	435
242	0.0002409	154	292	28	430
243	0.0002477	208	316	21	424
244	0.0002661	109	292	27	475
245	0.0002496	183	307	22	431
246	0.000258	108	269	28	430
247	0.0002434	187	321	24	455
248	0.0002599	221	329	23	437
249	0.0002476	80	304	28	528
250	0.0002784	126	302	28	478
251	0.000241	102	296	28	490
252	0.0002472	126	296	27	466
253	0.0002477	93	312	28	531
254	0.000247	175	299	21	423
255	0.0002192	53	268	23	483
256	0.0002708	109	302	20	495
257	0.0002477	186	309	25	432
258	0.000244	117	308	27	499
259	0.0002434	74	283	23	492
260	0.0002432	258	339	26	420
261	0.0002566	209	329	25	449
262	0.0002497	165	320	24	475
263	0.0002422	98	297	27	496
264	0.0003251	178	307	22	436
265	0.0002414	136	314	26	492
266	0.0003102	150	322	29	494
267	0.0002635	270	358	22	446
268	0.0002437	140	307	19	474
269	0.0002335	99	286	29	473
270	0.0002452	164	310	21	456
271	0.0002426	142	308	24	474
272	0.0002728	106	306	28	506
273	0.0003282	137	320	26	503
274	0.0002584	257	342	23	427
275	0.0002497	175	323	20	471
276	0.0002719	256	349	29	442
277	0.0002623	209	322	24	435
278	0.0002528	152	317	24	482
279	0.0002666	202	310	21	418
280	0.0002238	19	267	26	515
281	0.0002463	190	317	19	444
282	0.0002484	130	318	28	506
283	0.0002615	239	329	24	419
284	0.0002907	205	302	27	399
285	0.0002428	125	310	25	495
286	0.0002456	226	316	20	406
287	0.0002616	162	323	25	484
288	0.0002555	231	339	23	447
289	0.0002672	111	305	29	499
290	0.0002538	130	303	26	476
291	0.0003026	258	330	22	402
292	0.0002514	223	332	20	441
293	0.000255	167	315	26	463
294	0.0002462	193	313	19	433
295	0.0002501	176	313	28	450
296	0.0002532	166	306	27	446
297	0.0002577	178	327	21	476
298	0.0002566	254	328	21	402
299	0.0002577	89	285	25	481
300	0.0002336	38	291	28	544
301	0.0002686	147	321	26	495
302	0.0003206	279	364	22	449
303	0.0002451	163	315	29	467
304	0.0002398	148	313	22	478
305	0.000248	140	306	29	472
306	0.0002505	174	319	23	464
307	0.0002651	251	352	25	453
308	0.0002404	66	277	29	488
309	0.0002362	120	285	23	450
310	0.0002559	171	318	29	465
311	0.0002685	131	318	27	505
312	0.0002493	175	292	29	409
313	0.0002476	15	293	29	571
314	0.0002736	129	289	26	449
315	0.0002525	202	298	27	394
316	0.0002388	171	293	23	415
317	0.000221	86	272	24	458
318	0.0002623	309	350	26	391
319	0.0002406	189	319	19	449
320	0.0002882	234	334	25	434
321	0.0002441	103	293	28	483
322	0.0002502	160	307	25	454
323	0.0002498	160	305	19	450
324	0.0002927	118	312	29	506
325	0.0002447	131	303	21	475
326	0.0002479	175	314	19	453
327	0.000245	84	298	27	512
328	0.0002603	138	288	28	438
329	0.0002357	123	288	20	453
330	0.0002435	183	323	26	463
331	0.0002657	158	320	29	482
332	0.0002504	238	333	25	428
333	0.0002745	190	322	19	454
334	0.0002473	257	328	22	399
335	0.0002504	172	322	26	472
336	0.0002582	263	348	23	433
337	0.0002353	116	301	22	486
338	0.0002297	156	297	22	438
339	0.0002646	196	301	19	406
340	0.0002455	197	317	24	437
341	0.0002464	122	300	26	478
342	0.0002483	205	307	21	409
343	0.000243	175	315	23	455
344	0.0002724	136	307	24	478
345	0.0002527	174	306	27	438
346	0.0002481	181	325	23	469
347	0.0002498	119	309	29	499
348	0.0002636	145	308	26	471
349	0.0002357	165	304	26	443
350	0.0002546	65	301	28	537
351	0.0003305	252	347	21	442
352	0.0002844	138	296	28	454
353	0.0002433	175	297	22	419
354	0.0002451	183	299	22	415
355	0.000247	206	311	26	416
356	0.0002464	202	330	22	458
357	0.0002655	124	303	27	482
358	0.0002369	180	290	25	400
359	0.0002542	213	313	22	413
360	0.0002403	211	333	26	455
361	0.0002606	251	334	19	417
362	0.0002863	254	337	21	420
363	0.0002498	245	331	23	417
364	0.0002437	185	338	28	491
365	0.0002446	181	312	22	443
366	0.0002376	140	296	25	452
367	0.0002288	7	264	28	521
368	0.000243	205	315	27	425
369	0.0002483	96	308	29	520
370	0.0002559	184	320	21	456
371	0.0002485	163	314	25	465
372	0.0003342	203	334	20	465
373	0.0002394	99	297	24	495
374	0.000252	186	333	19	480
375	0.0002584	209	316	22	423
376	0.0002435	181	330	22	479
377	0.0002616	127	301	22	475
378	0.0002474	195	303	28	411
379	0.0002441	149	321	24	493
380	0.0002417	201	303	26	405
381	0.0002394	94	290	26	486
382	0.0002375	120	290	29	460
383	0.0002555	211	327	24	443
384	0.0002812	108	302	29	496
385	0.0002335	194	292	24	390
386	0.0002503	166	333	29	500
387	0.0002464	64	279	24	494
388	0.0002432	86	307	29	528
389	0.0002569	159	321	27	483
390	0.0002788	163	298	26	433
391	0.0002506	144	307	22	470
392	0.0002839	202	305	22	408
393	0.0002572	113	295	26	477
394	0.0002449	195	315	23	435
395	0.0002564	274	363	22	452
396	0.0002636	160	304	26	448
397	0.0002461	247	341	19	435
398	0.0002539	158	316	29	474
399	0.000234	87	300	21	513
400	0.0002353	127	305	28	483
401	0.0002513	144	296	22	448
402	0.0002573	205	340	26	475
403	0.0002284	114	285	28	456
404	0.0002417	182	305	23	428
405	0.0002569	190	339	28	488
406	0.0002446	135	297	28	459
407	0.0002522	286	343	25	400
408	0.0002801	140	300	21	460
409	0.0003281	138	305	21	472
410	0.0003142	193	321	20	449
411	0.0002655	149	309	28	469
412	0.0002546	193	324	26	455
413	0.0002376	170	301	22	432
414	0.000261	150	302	24	454
415	0.0002442	198	313	17	428
416	0.0002443	233	324	23	415
417	0.0002588	312	357	26	402
418	0.0002555	185	313	21	441
419	0.000243	207	327	27	447
420	0.0002473	215	312	22	409
421	0.0002498	163	308	26	453
422	0.0002538	228	320	21	412
423	0.0002536	210	328	21	446
424	0.0002509	247	332	24	417
425	0.0002635	213	332	29	451
426	0.0002353	141	307	25	473
427	0.0002783	201	328	28	455
428	0.0002493	192	326	24	460
429	0.0002477	175	325	21	475
430	0.0002503	115	313	24	511
431	0.000295	176	315	20	454
432	0.0002297	102	280	24	458
433	0.0002561	215	331	23	447
434	0.0002475	193	321	23	449
435	0.0002445	147	305	25	463
436	0.0002506	187	326	20	465
437	0.0002336	98	286	27	474
438	0.0002322	53	279	27	505
439	0.0002493	150	303	20	456
440	0.0002272	128	282	22	436
441	0.0002581	109	280	25	451
442	0.0002798	295	372	26	449
443	0.0002828	189	322	20	455
444	0.0002415	181	328	20	475
445	0.0002641	227	344	25	461
446	0.000249	212	317	18	422
447	0.0002527	251	334	28	417
448	0.0002622	252	345	25	438
449	0.0003059	187	324	29	461
450	0.0002611	181	327	24	473
451	0.0002412	154	313	26	472
452	0.0002703	191	323	27	455
453	0.0002861	117	311	21	505
454	0.0002443	81	298	29	515
455	0.0002574	189	339	24	489
456	0.0002496	159	306	21	453
457	0.0002349	120	309	27	498
458	0.0002499	197	319	23	441
459	0.0002477	197	300	21	403
460	0.0002399	76	294	28	512
461	0.0002369	122	299	22	476
462	0.0002402	176	298	27	420
463	0.000277	145	305	27	465
464	0.0002526	242	344	24	446
465	0.0002678	88	267	29	446
466	0.0002384	74	278	29	482
467	0.0002472	136	291	25	446
468	0.0002515	197	321	27	445
469	0.0002356	142	306	29	470
470	0.0002366	184	319	27	454
471	0.0002481	166	320	22	474
472	0.0002433	212	312	20	412
473	0.0002307	71	284	26	497
474	0.0003552	279	359	24	439
475	0.0002462	166	314	27	462
476	0.0002881	137	294	27	451
477	0.0002487	188	317	19	446
478	0.0002439	119	299	26	479
479	0.0002448	194	314	18	434
480	0.0002572	251	338	20	425
481	0.0002366	118	295	25	472
482	0.0002687	160	301	23	442
483	0.0002388	146	311	25	476
484	0.0002326	156	297	22	438
485	0.0002525	141	304	21	467
486	0.0002475	209	328	21	447
487	0.0002429	147	318	24	489
488	0.0002605	155	316	27	477
489	0.0002612	149	327	26	505
490	0.0002516	168	321	26	474
491	0.0002445	148	302	23	456
492	0.0002398	179	299	18	419
493	0.0002628	136	299	22	462
494	0.0002621	216	332	24	448
495	0.0002461	147	320	21	493
496	0.0002604	96	297	26	498
497	0.0002583	206	335	21	464
498	0.0002562	164	316	28	468
499	0.0002684	193	337	22	481
500	0.0002591	233	339	26	445
501	0.0002588	202	324	25	446
502	0.0002482	139	294	27	449
503	0.0002431	197	326	26	455
504	0.0002522	142	301	25	460
505	0.0002332	41	264	29	487
506	0.0002468	82	293	29	504
507	0.0002511	216	335	25	454
508	0.0002652	146	314	23	482
509	0.0002851	141	289	26	437
510	0.0002473	203	313	25	423
511	0.0002501	240	339	24	438
512	0.0002423	177	317	21	457
513	0.0002453	138	317	28	496
514	0.000227	91	281	27	471
515	0.0002431	138	319	24	500
516	0.0002441	134	290	25	446
517	0.0002544	213	341	21	469
518	0.0002605	194	306	26	418
519	0.0002449	180	334	23	488
520	0.0002529	282	350	20	418
521	0.0002444	158	300	29	442
522	0.0002359	65	304	29	543
523	0.0002507	157	311	24	465
524	0.0002357	128	286	25	444
525	0.0002514	223	330	24	437
526	0.0002459	178	293	24	408
527	0.0002809	102	292	26	482
528	0.0002475	158	318	27	478
529	0.0002342	110	296	23	482
530	0.0002605	152	329	21	506
531	0.0002514	166	320	21	474
532	0.00024	122	286	26	450
533	0.0002539	151	309	23	467
534	0.000256	141	314	28	487
535	0.0002441	201	308	21	415
536	0.0002388	92	291	28	490
537	0.0002517	181	329	24	477
538	0.0002458	203	346	24	489
539	0.0002443	102	305	29	508
540	0.0002415	111	301	29	491
541	0.0002585	165	328	22	491
542	0.000298	149	312	27	475
543	0.000244	242	325	23	408
544	0.0002375	143	315	25	487
545	0.000248	146	303	26	460
546	0.0002615	265	361	28	457
547	0.0002619	192	291	21	390
548	0.0002435	136	303	28	470
549	0.0002717	180	314	21	448
550	0.0002557	249	356	24	463
551	0.0002381	160	297	26	434
552	0.0002353	140	290	27	440
553	0.0002655	128	301	21	474
554	0.0002385	144	306	28	468
555	0.0002382	172	301	21	430
556	0.0002441	131	302	27	473
557	0.0002487	204	310	20	416
558	0.0002473	123	321	23	519
559	0.0002533	86	304	28	522
560	0.0002592	206	328	27	450
561	0.0002614	185	312	19	439
562	0.0002575	187	331	20	475
563	0.0002429	210	323	23	436
564	0.0002226	127	280	25	433
565	0.0002471	206	313	20	420
566	0.000252	229	338	28	447
567	0.0002573	103	287	29	471
568	0.0002655	121	334	28	547
569	0.0002462	169	309	28	449
570	0.0002411	190	287	19	384
571	0.0002591	106	292	28	478
572	0.0002451	188	323	28	458
573	0.0002738	87	324	29	561
574	0.0002471	204	322	22	440
575	0.0002478	158	313	25	468
576	0.0002437	82	288	28	494
577	0.0002519	188	319	22	450
578	0.0002468	187	322	22	457
579	0.0002877	122	313	23	504
580	0.0002486	228	323	29	418
581	0.000245	191	323	25	455
582	0.0002516	187	325	24	463
583	0.0002647	191	331	26	471
584	0.0002769	78	295	27	512
585	0.0002372	123	304	28	485
586	0.0002498	213	326	25	439
587	0.0002457	139	305	28	471
588	0.0002871	91	285	25	479
589	0.0002435	16	296	25	576
590	0.0003539	158	319	25	480
591	0.0002443	127	298	28	469
592	0.0002421	161	301	22	441
593	0.0002327	138	314	28	490
594	0.0002358	141	293	24	445
595	0.0002458	240	320	27	400
596	0.0002443	200	302	21	404
597	0.0002466	157	313	27	469
598	0.0002424	189	316	26	443
599	0.0002602	268	343	22	418
600	0.0002553	265	354	25	443
601	0.0002471	207	314	20	421
602	0.0002642	297	372	28	447
603	0.0002585	185	324	29	463
604	0.00026	194	316	22	438
605	0.000247	188	335	26	482
606	0.0002645	224	322	26	420
607	0.0002565	209	329	22	449
608	0.0002424	182	314	23	446
609	0.0002378	120	300	27	480
610	0.0002325	76	278	29	480
611	0.0002412	136	304	27	472
612	0.0002463	102	285	26	468
613	0.0002528	189	323	25	457
614	0.0002433	79	284	24	489
615	0.0003003	151	315	24	479
616	0.0002867	224	325	20	426
617	0.0002714	30	302	29	574
618	0.0002533	135	295	25	455
619	0.0002516	239	336	25	433
620	0.0002413	30	273	28	516
621	0.0002629	95	289	21	483
622	0.0002493	135	310	26	485
623	0.0002659	234	340	22	446
624	0.0002611	170	309	27	448
625	0.0002454	157	310	27	463
626	0.0002551	121	310	29	499
627	0.0002856	186	340	29	494
628	0.0002451	116	295	23	474
629	0.0002517	82	289	29	496
630	0.0002547	94	297	28	500
631	0.0002725	151	310	23	469
632	0.0002436	173	295	20	417
633	0.0002341	155	304	24	453
634	0.0002641	113	303	29	493
635	0.0002556	173	319	21	465
636	0.0002451	167	310	21	453
637	0.0002388	113	309	25	505
638	0.0002427	225	326	23	427
639	0.000249	266	349	25	432
640	0.0002481	113	292	26	471
641	0.0002343	175	304	26	433
642	0.000281	221	350	26	479
643	0.0002453	231	345	26	459
644	0.0002416	136	294	26	452
645	0.0002435	174	303	28	432
646	0.000235	85	281	23	477
647	0.0002399	177	330	21	483
648	0.000234	158	300	27	442
649	0.0002489	177	324	29	471
650	0.0002558	276	338	19	400
651	0.0002372	91	308	27	525
652	0.0002437	185	304	19	423
653	0.0002478	136	313	29	490
654	0.000246	164	327	28	490
655	0.0002642	102	301	27	500
656	0.0002674	24	277	28	530
657	0.0002357	161	301	20	441
658	0.0002541	151	294	27	437
659	0.0002486	199	331	21	463
660	0.0003018	216	339	28	462
661	0.0002589	259	339	23	419
662	0.0002497	193	320	21	447
663	0.0002764	109	302	26	495
664	0.0002389	155	314	23	473
665	0.0002516	243	329	24	415
666	0.0002544	270	345	27	420
667	0.0002467	195	297	21	399
668	0.000249	136	314	28	492
669	0.0002991	177	306	27	435
670	0.0002532	132	289	29	446
671	0.000269	147	307	24	467
672	0.0002634	157	309	24	461
673	0.0002554	214	333	23	452
674	0.0002514	188	301	28	414
675	0.0002632	157	312	29	467
676	0.0003008	173	319	25	465
677	0.0002818	189	314	25	439
678	0.0002458	175	317	24	459
679	0.0002499	102	307	28	512
680	0.0002495	170	335	27	500
681	0.0002604	156	306	26	456
682	0.0002518	186	329	23	472
683	0.0002471	157	321	29	485
684	0.0002505	181	331	23	481
685	0.000237	87	286	25	485
686	0.0002374	145	294	22	443
687	0.0002488	163	317	28	471
688	0.0002351	93	294	27	495
689	0.0002327	87	288	23	489
690	0.0002411	155	318	28	481
691	0.0002632	210	319	27	428
692	0.0002732	273	349	26	425
693	0.000248	90	290	26	490
694	0.0002509	186	316	23	446
695	0.0002549	204	326	18	448
696	0.0002496	223	325	26	427
697	0.0002413	179	310	20	441
698	0.0002423	115	309	29	503
699	0.0002676	157	335	24	513
700	0.0002538	224	317	20	410
701	0.0002764	166	299	19	432
702	0.0002521	213	325	27	437
703	0.0002866	271	330	22	389
704	0.000238	57	292	29	527
705	0.000254	160	311	27	462
706	0.0002424	143	319	24	495
707	0.0002669	130	312	26	494
708	0.00025	121	315	26	509
709	0.0002564	259	345	23	431
710	0.000293	192	344	23	496
711	0.0002576	200	344	24	488
712	0.0002367	118	299	23	480
713	0.0002618	234	332	27	430
714	0.0002669	238	323	24	408
715	0.0002453	183	311	25	439
716	0.0002491	169	321	25	473
717	0.0002407	191	309	19	427
718	0.0002604	196	330	28	464
719	0.0002424	111	312	26	513
720	0.0002372	153	306	25	459
721	0.0002422	199	309	21	419
722	0.0002362	111	284	24	457
723	0.0002912	110	305	29	500
724	0.0002536	191	318	25	445
725	0.0002498	155	317	29	479
726	0.0002675	151	299	24	447
727	0.0002523	282	357	23	432
728	0.0002668	185	320	23	455
729	0.0002411	129	298	27	467
730	0.0002473	144	315	28	486
731	0.0002441	131	309	29	487
732	0.0002451	89	298	29	507
733	0.0002527	192	306	24	420
734	0.0002402	162	295	19	428
735	0.0002652	178	306	23	434
736	0.000256	239	339	22	439
737	0.0002714	230	340	24	450
738	0.0002376	146	309	27	472
739	0.0002465	109	304	28	499
740	0.000243	157	299	22	441
741	0.0002622	171	310	21	449
742	0.0002536	136	313	28	490
743	0.0002587	142	312	23	482
744	0.0002703	193	316	17	439
745	0.000317	180	303	21	426
746	0.0002369	221	314	21	407
747	0.0002624	220	313	17	406
748	0.000255	182	317	24	452
749	0.0002401	113	303	23	493
750	0.0002447	135	318	24	501
751	0.000249	188	307	23	426
752	0.0002479	196	328	26	460
753	0.00025	237	339	28	441
754	0.000244	120	303	29	486
755	0.0002527	76	297	29	518
756	0.0002437	142	307	28	472
757	0.000305	160	315	20	470
758	0.0002422	190	310	28	430
759	0.0002292	95	280	25	465
760	0.0002349	208	313	20	418
761	0.0002493	174	311	24	448
762	0.0002439	179	315	27	451
763	0.0002396	139	306	25	473
764	0.0002445	160	277	26	394
765	0.0002346	213	291	19	369
766	0.0002411	60	303	29	546
767	0.0002545	172	336	21	500
768	0.0002457	192	321	23	450
769	0.0002423	98	294	27	490
770	0.000289	248	350	26	452
771	0.0002481	181	295	25	409
772	0.0002516	173	305	22	437
773	0.0002354	138	278	28	418
774	0.000232	131	292	24	453
775	0.0002352	140	299	26	458
776	0.0002275	118	286	29	454
777	0.0002408	139	300	24	461
778	0.0002945	159	313	25	467
779	0.0002377	168	299	23	430
780	0.0002475	191	326	26	461
781	0.0002396	74	298	29	522
782	0.000259	182	326	29	470
783	0.0002403	136	314	26	492
784	0.0002294	133	306	28	479
785	0.0002519	159	319	27	479
786	0.000246	217	326	25	435
787	0.0002356	75	280	28	485
788	0.0002623	120	295	25	470
789	0.000241	161	300	20	439
790	0.0002592	231	348	28	465
791	0.0002403	169	298	19	427
792	0.0002891	219	337	24	455
793	0.0002472	166	316	23	466
794	0.0002513	158	334	29	510
795	0.0002497	185	321	20	457
796	0.0002826	177	324	23	471
797	0.0002418	169	306	20	443
798	0.0002433	133	309	29	485
799	0.0002248	125	289	27	453
800	0.0002523	201	319	25	437
801	0.0002524	227	337	21	447
802	0.000236	159	303	22	447
803	0.0002633	228	342	21	456
804	0.0002669	223	334	27	445
805	0.0002739	255	328	19	401
806	0.000255	139	323	28	507
807	0.0002564	171	317	21	463
808	0.0002774	130	301	26	472
809	0.0002509	122	319	28	516
810	0.0002484	167	321	26	475
811	0.0002587	279	354	23	429
812	0.0002343	102	299	27	496
813	0.0002416	160	306	28	452
814	0.0002434	102	299	29	496
815	0.0002432	176	318	25	460
816	0.0002253	65	276	29	487
817	0.0002522	182	301	19	420
818	0.0002502	193	326	21	459
819	0.0002822	220	335	23	450
820	0.0002488	160	310	23	460
821	0.0002453	168	309	22	450
822	0.0002402	128	310	27	492
823	0.0002526	217	337	20	457
824	0.000249	209	314	20	419
825	0.0002367	155	294	22	433
826	0.0003016	126	303	20	480
827	0.000247	148	329	26	510
828	0.0002425	148	318	20	488
829	0.0002729	188	320	28	452
830	0.0002658	243	365	24	487
831	0.0002381	132	302	26	472
832	0.0002414	203	325	27	447
833	0.0002462	216	322	24	428
834	0.00027	196	315	29	434
835	0.000267	218	306	17	394
836	0.0002488	83	315	27	547
837	0.0002421	164	306	20	448
838	0.000292	246	343	29	440
839	0.000243	93	279	26	465
840	0.0002404	147	313	24	479
841	0.000243	173	310	26	447
842	0.0002822	111	289	24	467
843	0.0002429	169	309	25	449
844	0.0002524	203	319	19	435
845	0.0002321	148	285	29	422
846	0.000271	30	268	28	506
847	0.0002655	125	327	25	529
848	0.0002363	142	292	25	442
849	0.0003252	146	312	26	478
850	0.000249	137	326	27	515
851	0.0002658	241	344	23	447
852	0.0002716	126	304	28	482
853	0.0002631	155	293	26	431
854	0.0002377	128	297	25	466
855	0.0002632	216	334	24	452
856	0.0002463	229	328	19	427
857	0.0002513	180	330	27	480
858	0.0002436	204	323	20	442
859	0.0002601	190	310	22	430
860	0.0002778	122	321	29	520
861	0.0002649	141	323	27	505
862	0.0002601	107	314	25	521
863	0.0002865	217	324	23	431
864	0.0002533	147	312	27	477
865	0.0002619	144	331	29	518
866	0.0002648	120	302	23	484
867	0.0002781	220	349	22	478
868	0.0002354	121	303	27	485
869	0.0002421	230	317	24	404
870	0.0002377	92	297	26	502
871	0.000234	128	308	28	488
872	0.0002934	149	305	24	461
873	0.0002775	172	298	23	424
874	0.0002865	124	311	29	498
875	0.0002449	193	327	27	461
876	0.0002862	219	357	26	495
877	0.0002517	277	351	28	425
878	0.0002589	123	309	28	495
879	0.0002414	131	298	28	465
880	0.0002386	78	278	24	478
881	0.0002976	130	299	26	468
882	0.0003372	214	331	20	448
883	0.0002625	233	337	28	441
884	0.0002543	255	344	26	433
885	0.0002449	179	312	21	445
886	0.0002797	248	341	24	434
887	0.0002527	247	320	19	393
888	0.0002404	152	309	22	466
889	0.0002354	120	282	26	444
890	0.0002471	191	323	21	455
891	0.0002999	150	290	22	430
892	0.0002363	226	328	25	430
893	0.0002313	119	291	26	463
894	0.0002624	207	341	26	475
895	0.0002389	216	324	19	432
896	0.000247	201	326	25	451
897	0.0002434	64	273	28	482
898	0.0002479	127	303	23	479
899	0.0002366	123	296	28	469
900	0.0002497	144	307	24	470
901	0.0002424	180	306	24	432
902	0.0002519	138	310	24	482
903	0.0002417	150	309	22	468
904	0.0002523	183	315	28	447
905	0.0002467	138	298	24	458
906	0.0002563	213	328	22	443
907	0.0002575	152	297	20	442
908	0.0002316	45	282	25	519
909	0.0002526	224	326	19	428
910	0.0002451	214	336	27	458
911	0.0002488	163	320	26	477
912	0.0002429	244	330	25	416
913	0.0003417	54	289	29	524
914	0.0003016	206	332	23	458
915	0.0002436	94	288	26	482
916	0.000235	142	289	22	436
917	0.0002381	97	316	26	535
918	0.000237	180	302	27	424
919	0.0002321	201	290	19	379
920	0.0002666	124	298	23	472
921	0.000255	153	315	21	477
922	0.0002491	221	335	21	449
923	0.0002333	61	281	28	501
924	0.0002453	114	309	26	504
925	0.000253	245	328	23	411
926	0.0002663	133	314	21	495
927	0.0002691	132	304	29	476
928	0.0002626	153	309	28	465
929	0.0002518	234	334	25	434
930	0.0002429	267	331	23	395
931	0.0002675	202	334	25	466
932	0.0003423	141	326	28	511
933	0.0002502	90	284	28	478
934	0.0002555	140	288	24	436
935	0.0002301	122	284	24	446
936	0.0002453	179	316	20	453
937	0.0002524	183	326	28	469
938	0.0002325	112	290	29	468
939	0.0002575	175	291	25	407
940	0.0002466	213	337	23	461
941	0.0002408	69	305	25	541
942	0.0002504	170	304	20	438
943	0.0002531	142	311	28	480
944	0.0002391	119	314	23	509
945	0.00024	188	302	20	416
946	0.0002533	182	323	25	464
947	0.0002344	163	298	19	433
948	0.0002452	165	314	27	463
949	0.0002288	143	295	21	447
950	0.0002747	217	348	23	479
951	0.0002481	174	324	23	474
952	0.0002428	108	298	27	488
953	0.0002583	183	322	23	461
954	0.0002617	65	296	28	527
955	0.0002462	180	327	24	474
956	0.0002401	146	302	25	458
957	0.0002469	164	313	21	462
958	0.0003196	75	294	28	513
959	0.0002566	239	332	29	425
960	0.0002615	218	311	20	404
961	0.0002756	166	300	27	434
962	0.0002449	113	299	27	485
963	0.0002605	165	312	29	459
964	0.0002449	184	324	22	464
965	0.0002831	131	328	27	525
966	0.0002473	132	307	20	482
967	0.0002505	176	302	24	428
968	0.0002387	87	305	28	523
969	0.000233	150	290	23	430
970	0.0002403	220	292	19	364
971	0.0002444	176	299	24	422
972	0.0002589	150	309	27	468
973	0.0002622	126	329	29	532
974	0.0002295	120	293	24	466
975	0.0002501	137	305	26	473
976	0.0002347	149	297	23	445
977	0.0002775	199	317	21	435
978	0.0002832	131	324	27	517
979	0.0002689	199	319	18	439
980	0.0002956	169	300	21	431
981	0.0002343	137	300	25	463
982	0.0002354	127	303	26	479
983	0.0002709	212	329	25	446
984	0.0002538	187	325	21	463
985	0.0003787	80	305	28	530
986	0.0002685	78	292	28	506
987	0.0002626	251	344	28	437
988	0.0002512	108	301	28	494
989	0.0003054	205	321	28	437
990	0.0002706	96	293	28	490
991	0.0002321	85	283	29	481
992	0.0002643	172	310	18	448
993	0.0002444	191	309	21	427
994	0.0002297	45	268	25	491
995	0.000242	176	312	24	448
996	0.0002607	186	330	25	474
997	0.0002485	217	325	27	433
998	0.0002587	244	333	24	422
999	0.0002386	93	289	26	485
mean	0.000254388	163.772	312.119	24.709	460.466

## Sheet: GS_Opt
	time	SEq	Bal	Reg	Egal
0	0.0004425	218	317	26	416
1	0.0004319	131	277	23	394
2	0.0004464	184	331	24	417
3	0.0004728	205	315	18	425
4	0.00042	78	289	27	439
5	0.0004264	209	311	24	384
6	0.0004575	182	308	23	433
7	0.0004263	203	339	27	429
8	0.0004451	91	276	25	408
9	0.0004275	223	333	25	427
10	0.0004297	210	333	20	445
11	0.0005225	113	293	25	458
12	0.0004275	121	284	24	409
13	0.0004862	111	315	26	445
14	0.0004694	186	312	29	411
15	0.0004394	126	309	23	450
16	0.0005248	222	338	24	454
17	0.0004572	141	295	29	421
18	0.0005925	149	293	19	422
19	0.0004256	159	305	26	431
20	0.0004269	135	298	27	415
21	0.0004376	136	301	23	387
22	0.0004183	125	309	24	426
23	0.0004283	218	328	21	438
24	0.0004134	135	314	23	442
25	0.0004538	166	320	24	443
26	0.0004229	147	297	21	415
27	0.0004434	167	292	23	393
28	0.0004265	187	316	22	439
29	0.0004197	147	315	23	421
30	0.0004621	199	311	25	421
31	0.0004264	142	295	20	445
32	0.0004231	113	310	29	435
33	0.0004629	182	306	19	410
34	0.0004375	186	308	29	428
35	0.0004083	106	283	27	414
36	0.0004437	196	297	23	385
37	0.0004191	129	290	20	428
38	0.0005075	117	309	23	487
39	0.0004714	210	327	20	444
40	0.0004544	93	267	20	395
41	0.0004214	173	314	18	435
42	0.0004339	103	311	26	459
43	0.0004165	96	281	22	401
44	0.0004422	204	333	25	441
45	0.0004415	207	333	22	434
46	0.0004296	102	300	20	426
47	0.0005033	213	331	21	449
48	0.0004215	190	309	21	428
49	0.0004246	145	303	24	424
50	0.0004496	139	303	19	431
51	0.0004342	103	288	29	442
52	0.0004446	172	287	21	402
53	0.000472	192	323	25	449
54	0.0004382	143	309	27	460
55	0.0004448	273	352	27	419
56	0.0004351	164	303	21	420
57	0.0004586	140	281	26	381
58	0.0005135	174	315	20	440
59	0.000425	187	319	25	439
60	0.0006406	135	311	23	466
61	0.0004599	76	275	25	398
62	0.0004272	107	284	29	412
63	0.0004432	189	309	29	429
64	0.0004428	96	298	20	407
65	0.000426	158	318	25	441
66	0.0004132	161	306	28	438
67	0.0004422	55	290	25	484
68	0.0004134	169	298	29	392
69	0.0003958	101	289	18	409
70	0.0004317	217	328	24	439
71	0.0004649	283	345	29	407
72	0.0004187	152	317	24	445
73	0.0004539	251	346	21	441
74	0.0004336	210	318	23	414
75	0.0004579	232	322	20	412
76	0.0004182	185	301	22	406
77	0.0004324	155	326	29	473
78	0.0004048	101	283	23	415
79	0.000411	142	293	26	404
80	0.0004777	265	348	21	416
81	0.0004223	119	305	23	436
82	0.000432	219	314	20	399
83	0.000424	143	299	21	415
84	0.0004413	180	304	21	414
85	0.0004353	184	332	25	443
86	0.0004261	106	278	20	416
87	0.0004293	77	288	23	437
88	0.0004401	204	306	18	408
89	0.0004732	206	335	25	430
90	0.0004414	270	347	22	421
91	0.0004271	136	295	22	440
92	0.0006617	150	317	26	453
93	0.0004334	210	320	23	399
94	0.0004181	109	294	28	396
95	0.0004157	116	298	24	410
96	0.0004802	164	323	21	447
97	0.0004368	216	319	23	421
98	0.0004172	120	301	27	438
99	0.0004445	165	319	24	420
100	0.0004244	153	299	20	418
101	0.000427	53	297	25	468
102	0.0004291	142	303	26	435
103	0.0004119	124	292	26	420
104	0.000459	187	340	29	470
105	0.0004291	201	328	28	440
106	0.0004444	259	358	25	457
107	0.0004283	204	327	26	450
108	0.0004522	180	318	25	422
109	0.000483	140	321	23	432
110	0.0004278	135	315	28	436
111	0.0004049	102	308	27	441
112	0.0004166	218	315	23	412
113	0.0004271	120	304	22	441
114	0.0004635	165	288	16	394
115	0.000433	284	356	23	423
116	0.0004576	165	316	26	460
117	0.0004587	218	341	23	435
118	0.0004469	181	311	20	431
119	0.0004898	149	283	25	416
120	0.0004252	260	336	29	405
121	0.0004669	184	309	29	425
122	0.0004442	72	291	24	432
123	0.0004313	129	321	27	447
124	0.0004384	196	333	25	445
125	0.0004491	92	280	25	431
126	0.0004388	142	308	26	443
127	0.0004877	159	311	24	443
128	0.0004677	100	304	22	455
129	0.0004678	209	314	19	419
130	0.0004114	165	292	22	384
131	0.0004584	205	321	21	437
132	0.0004239	226	345	20	464
133	0.0004521	130	287	23	409
134	0.0004337	151	306	26	435
135	0.0004579	193	325	19	457
136	0.000416	167	303	22	388
137	0.000446	123	287	28	440
138	0.0004296	196	323	24	416
139	0.0004939	210	323	24	400
140	0.000442	44	300	24	419
141	0.0004601	258	328	18	398
142	0.0004135	157	318	24	435
143	0.0004582	157	329	25	464
144	0.0004779	194	339	20	425
145	0.0004025	83	290	27	452
146	0.0004678	219	315	20	411
147	0.0004015	181	313	22	426
148	0.0004717	213	336	25	441
149	0.0004744	200	328	24	456
150	0.0004206	225	350	26	443
151	0.000437	188	312	28	397
152	0.0004174	135	297	22	408
153	0.0004221	164	317	29	450
154	0.0004056	91	299	23	453
155	0.0004109	153	300	28	436
156	0.000429	128	304	28	429
157	0.0004481	167	323	26	430
158	0.0004075	116	297	20	398
159	0.0004771	156	309	27	422
160	0.0004851	157	303	26	438
161	0.0004954	160	328	24	445
162	0.0004506	141	305	28	433
163	0.0004238	237	319	23	398
164	0.0004429	275	365	25	452
165	0.0004407	104	284	24	417
166	0.0004397	146	296	23	409
167	0.0004339	222	325	23	428
168	0.0004346	206	328	24	424
169	0.0004267	190	316	23	436
170	0.0004249	78	296	27	423
171	0.0004307	218	338	20	458
172	0.000428	113	297	23	431
173	0.000422	201	319	26	426
174	0.0004271	144	291	22	410
175	0.0004178	157	313	25	411
176	0.0004177	207	317	18	382
177	0.0004802	259	339	27	419
178	0.0004408	161	330	26	464
179	0.0004204	113	298	28	438
180	0.0004343	168	306	21	440
181	0.0004314	281	344	26	407
182	0.0004409	164	302	25	422
183	0.0004079	150	281	19	403
184	0.0004291	97	299	24	439
185	0.0004041	149	293	23	415
186	0.0004734	169	320	26	440
187	0.0004193	170	330	24	447
188	0.0004446	211	328	22	439
189	0.0004444	213	332	24	427
190	0.0004194	164	310	25	425
191	0.0004303	278	350	23	422
192	0.0004502	167	317	22	467
193	0.0004523	155	323	27	454
194	0.0004128	92	302	27	455
195	0.0004529	112	324	28	445
196	0.0004506	170	312	20	451
197	0.0005058	64	292	24	433
198	0.0004543	184	306	19	395
199	0.0004171	72	296	25	452
200	0.0004194	151	315	26	433
201	0.0004326	150	307	25	437
202	0.0004147	166	313	26	426
203	0.0004925	121	303	25	417
204	0.000421	189	325	22	426
205	0.0004084	89	284	28	413
206	0.0004549	262	358	29	454
207	0.000495	102	305	26	407
208	0.0004317	164	308	26	430
209	0.0004362	228	323	26	418
210	0.0004399	142	301	22	434
211	0.0004097	17	287	28	446
212	0.0004196	158	318	24	449
213	0.0004493	163	330	27	428
214	0.0004255	162	322	25	447
215	0.0004689	219	335	26	428
216	0.0004569	192	326	27	451
217	0.0004228	109	276	25	407
218	0.0004689	221	323	20	421
219	0.000449	156	318	25	395
220	0.0004039	105	293	26	425
221	0.000436	104	302	26	404
222	0.0004284	72	293	28	461
223	0.0004712	190	307	19	414
224	0.0004179	45	278	23	424
225	0.0004836	190	304	22	405
226	0.0004341	244	316	21	359
227	0.0004384	238	310	20	382
228	0.0004737	170	306	25	442
229	0.0004266	165	314	24	434
230	0.0004375	89	300	21	409
231	0.0004623	215	314	24	405
232	0.0004319	146	302	25	426
233	0.0004562	122	317	27	426
234	0.0004304	139	293	20	403
235	0.0004412	174	304	22	399
236	0.0004449	149	302	24	420
237	0.0004683	299	366	25	433
238	0.0004148	180	314	23	404
239	0.0004184	173	329	27	457
240	0.0004446	188	314	21	429
241	0.0004131	193	314	28	416
242	0.0004069	154	292	28	422
243	0.0004316	208	316	21	411
244	0.0004499	109	292	27	453
245	0.0004415	183	307	22	431
246	0.0004276	108	269	28	395
247	0.0004612	187	321	24	448
248	0.0004274	221	329	23	423
249	0.0004318	80	304	26	454
250	0.0004724	126	302	27	463
251	0.0004128	102	296	27	457
252	0.0004555	126	296	27	410
253	0.0004275	93	312	26	453
254	0.000423	175	299	21	423
255	0.0004202	53	268	23	436
256	0.0004638	109	302	20	424
257	0.0004459	186	309	25	432
258	0.0004612	117	308	27	427
259	0.0005003	74	283	23	435
260	0.0004312	258	339	26	420
261	0.0004331	209	329	25	441
262	0.0004329	165	320	23	422
263	0.0004892	98	297	27	424
264	0.0005195	178	307	22	436
265	0.0004378	136	314	26	449
266	0.0004967	150	322	24	444
267	0.0004482	270	358	22	446
268	0.0004431	140	307	19	451
269	0.0004752	99	286	20	420
270	0.0004366	164	310	21	430
271	0.0004228	142	308	24	416
272	0.0004472	106	306	28	431
273	0.000546	137	320	26	493
274	0.0004354	257	342	23	406
275	0.0004538	175	323	20	463
276	0.0004498	256	349	29	442
277	0.0004531	209	322	24	400
278	0.0005729	152	317	24	435
279	0.0004368	202	310	21	400
280	0.0004684	19	267	26	413
281	0.0004392	190	317	19	444
282	0.0004151	130	318	23	455
283	0.0004372	239	329	24	419
284	0.0004984	205	302	27	399
285	0.0004168	125	310	23	442
286	0.0004675	226	316	20	406
287	0.0004682	162	323	25	468
288	0.0004452	231	339	22	428
289	0.0004381	111	305	28	428
290	0.0004351	130	303	26	458
291	0.0004665	258	330	22	402
292	0.0004228	223	332	20	441
293	0.0004263	167	315	26	440
294	0.0004266	193	313	19	433
295	0.0004196	176	313	28	410
296	0.0004288	166	306	26	425
297	0.0004347	178	327	21	459
298	0.0004407	254	328	21	402
299	0.0004452	89	285	25	423
300	0.0004126	38	291	28	459
301	0.0004602	147	321	26	471
302	0.0005083	279	364	22	449
303	0.0004074	163	315	25	404
304	0.0004475	148	313	22	470
305	0.0004291	140	306	25	425
306	0.0004292	174	319	23	440
307	0.0004404	251	352	25	439
308	0.000403	66	277	29	402
309	0.0004893	120	285	21	384
310	0.000446	171	318	27	446
311	0.0004454	131	318	26	428
312	0.0004248	175	292	27	409
313	0.0004366	15	293	25	439
314	0.000454	129	289	23	431
315	0.0004556	202	298	25	392
316	0.0004276	171	293	23	390
317	0.0003967	86	272	24	390
318	0.0004253	309	350	26	391
319	0.0004312	189	319	19	426
320	0.0004708	234	334	25	434
321	0.0004355	103	293	26	426
322	0.0004329	160	307	23	420
323	0.0004455	160	305	19	434
324	0.000545	118	312	27	445
325	0.0004373	131	303	21	456
326	0.0004648	175	314	19	453
327	0.000415	84	298	26	411
328	0.0004414	138	288	27	408
329	0.0004177	123	288	20	450
330	0.000431	183	323	23	439
331	0.0004372	158	320	24	443
332	0.0004424	238	333	25	428
333	0.0004511	190	322	19	428
334	0.0004179	257	328	22	399
335	0.0004297	172	322	26	434
336	0.0004403	263	348	23	420
337	0.0004141	116	301	22	462
338	0.0004007	156	297	22	438
339	0.0004358	196	301	19	406
340	0.000419	197	317	24	435
341	0.000448	122	300	26	424
342	0.0004219	205	307	21	407
343	0.0004238	175	315	23	428
344	0.0004615	136	307	24	449
345	0.0004344	174	306	27	430
346	0.0004409	181	325	23	469
347	0.0004203	119	309	29	439
348	0.0004961	145	308	26	432
349	0.0004026	165	304	26	421
350	0.0004339	65	301	28	447
351	0.0005141	252	347	21	442
352	0.0004735	138	296	28	439
353	0.0004351	175	297	22	415
354	0.0004167	183	299	19	384
355	0.0004305	206	311	23	414
356	0.0004379	202	330	22	455
357	0.0004599	124	303	25	440
358	0.0004538	180	290	25	400
359	0.0004266	213	313	22	413
360	0.000432	211	333	26	455
361	0.0004417	251	334	19	417
362	0.0004859	254	337	21	419
363	0.0004221	245	331	23	411
364	0.0004729	185	338	27	461
365	0.0004305	181	312	22	432
366	0.0004152	140	296	19	412
367	0.0004628	7	264	27	428
368	0.000421	205	315	27	422
369	0.0004357	96	308	24	462
370	0.0004569	184	320	21	444
371	0.0004239	163	314	25	428
372	0.0005124	203	334	20	459
373	0.0004153	99	297	24	439
374	0.0004409	186	333	19	459
375	0.0004528	209	316	22	417
376	0.0004309	181	330	22	428
377	0.0004695	127	301	22	443
378	0.0004205	195	303	28	398
379	0.0004116	149	321	24	424
380	0.0004096	201	303	25	390
381	0.0004145	94	290	25	420
382	0.0004117	120	290	29	421
383	0.0004331	211	327	24	443
384	0.0004591	108	302	24	441
385	0.0004484	194	292	24	390
386	0.000428	166	333	29	468
387	0.0004131	64	279	24	431
388	0.0004229	86	307	27	463
389	0.0004501	159	321	21	453
390	0.0004452	163	298	26	414
391	0.0004227	144	307	22	421
392	0.0004781	202	305	22	387
393	0.0004433	113	295	26	433
394	0.0004293	195	315	23	424
395	0.0004366	274	363	22	452
396	0.0004359	160	304	26	407
397	0.0004311	247	341	19	429
398	0.0004663	158	316	21	434
399	0.0004399	87	300	21	462
400	0.0004114	127	305	28	435
401	0.0004249	144	296	22	390
402	0.0004383	205	340	26	464
403	0.0004274	114	285	19	396
404	0.0004362	182	305	23	422
405	0.0004878	190	339	27	446
406	0.0004205	135	297	23	421
407	0.0004601	286	343	25	400
408	0.0004742	140	300	21	451
409	0.000577	138	305	21	406
410	0.0004901	193	321	20	420
411	0.0004541	149	309	26	439
412	0.0004508	193	324	26	455
413	0.0004187	170	301	22	407
414	0.0004451	150	302	24	420
415	0.0004729	198	313	17	422
416	0.000419	233	324	23	415
417	0.0004264	312	357	26	402
418	0.0004413	185	313	21	420
419	0.0004232	207	327	27	435
420	0.0004247	215	312	22	409
421	0.0004411	163	308	26	432
422	0.0004589	228	320	21	412
423	0.0004499	210	328	21	430
424	0.0004183	247	332	24	417
425	0.0004556	213	332	20	439
426	0.0004488	141	307	23	436
427	0.0004867	201	328	28	443
428	0.0004497	192	326	24	460
429	0.0004263	175	325	21	464
430	0.0004601	115	313	24	457
431	0.0004738	176	315	20	427
432	0.0004167	102	280	24	437
433	0.0004431	215	331	23	446
434	0.0004186	193	321	23	422
435	0.0004321	147	305	25	462
436	0.0004156	187	326	20	434
437	0.0004133	98	286	27	398
438	0.0004454	53	279	26	408
439	0.0004494	150	303	20	429
440	0.0004104	128	282	22	414
441	0.0004741	109	280	25	444
442	0.0004457	295	372	26	444
443	0.0004502	189	322	20	451
444	0.0004261	181	328	20	445
445	0.0004523	227	344	25	442
446	0.0004201	212	317	18	421
447	0.0004441	251	334	28	417
448	0.0004345	252	345	25	438
449	0.0004821	187	324	27	427
450	0.0004342	181	327	24	461
451	0.0004235	154	313	26	440
452	0.0004972	191	323	27	454
453	0.0004453	117	311	21	462
454	0.0004146	81	298	27	439
455	0.0005038	189	339	24	489
456	0.00043	159	306	21	444
457	0.0004191	120	309	22	444
458	0.0004532	197	319	23	438
459	0.0004204	197	300	21	397
460	0.0004478	76	294	28	433
461	0.0004105	122	299	22	425
462	0.0004208	176	298	22	400
463	0.0004604	145	305	27	448
464	0.0004477	242	344	24	446
465	0.0004543	88	267	18	372
466	0.0004286	74	278	18	424
467	0.0004536	136	291	22	392
468	0.0004408	197	321	27	419
469	0.0004219	142	306	25	444
470	0.0004407	184	319	27	427
471	0.0004242	166	320	22	431
472	0.0004434	212	312	20	410
473	0.0004209	71	284	24	422
474	0.0005293	279	359	24	439
475	0.0004242	166	314	23	441
476	0.0004733	137	294	24	417
477	0.0004139	188	317	19	437
478	0.0004381	119	299	25	437
479	0.0004181	194	314	18	434
480	0.000458	251	338	20	425
481	0.0004146	118	295	25	436
482	0.0004592	160	301	23	437
483	0.000415	146	311	25	414
484	0.0004152	156	297	22	427
485	0.0004164	141	304	21	431
486	0.0004653	209	328	21	434
487	0.0004206	147	318	24	435
488	0.0004527	155	316	23	447
489	0.0004398	149	327	24	426
490	0.0004488	168	321	26	466
491	0.0004454	148	302	23	434
492	0.0004183	179	299	18	419
493	0.0004627	136	299	22	433
494	0.0005092	216	332	24	416
495	0.0004225	147	320	21	444
496	0.0004508	96	297	26	430
497	0.000431	206	335	21	430
498	0.0004409	164	316	28	464
499	0.0004549	193	337	22	459
500	0.0004362	233	339	26	442
501	0.0004341	202	324	25	446
502	0.0004461	139	294	26	416
503	0.0004732	197	326	26	451
504	0.0004419	142	301	25	412
505	0.0004129	41	264	25	398
506	0.0004102	82	293	29	405
507	0.0004395	216	335	25	434
508	0.0004603	146	314	23	442
509	0.0004629	141	289	25	393
510	0.0004314	203	313	22	401
511	0.0005856	240	339	24	414
512	0.0004242	177	317	21	430
513	0.0004357	138	317	27	447
514	0.0004149	91	281	27	449
515	0.0004126	138	319	24	423
516	0.000468	134	290	25	415
517	0.0004401	213	341	21	459
518	0.0004367	194	306	24	400
519	0.0004252	180	334	23	453
520	0.0004332	282	350	20	418
521	0.0004357	158	300	26	425
522	0.0004322	65	304	26	481
523	0.0004433	157	311	24	456
524	0.0004574	128	286	25	400
525	0.0004258	223	330	24	418
526	0.0004204	178	293	24	396
527	0.0004683	102	292	24	433
528	0.0004287	158	318	27	453
529	0.0004074	110	296	23	440
530	0.0004604	152	329	21	479
531	0.0004362	166	320	20	425
532	0.0004145	122	286	26	450
533	0.0004331	151	309	23	436
534	0.0004245	141	314	28	440
535	0.0004217	201	308	21	415
536	0.0004612	92	291	23	429
537	0.0004278	181	329	24	477
538	0.0004173	203	346	24	449
539	0.0004304	102	305	23	451
540	0.0004252	111	301	29	423
541	0.0004294	165	328	22	473
542	0.0004711	149	312	25	433
543	0.0004465	242	325	23	398
544	0.0004347	143	315	23	449
545	0.0004305	146	303	25	438
546	0.0004405	265	361	26	457
547	0.0004571	192	291	21	390
548	0.000431	136	303	27	436
549	0.000476	180	314	21	439
550	0.0004499	249	356	24	463
551	0.0004222	160	297	26	430
552	0.0004371	140	290	23	418
553	0.0004512	128	301	21	422
554	0.0004824	144	306	27	432
555	0.0004321	172	301	21	430
556	0.0004262	131	302	27	418
557	0.000441	204	310	20	416
558	0.0004441	123	321	23	482
559	0.0004391	86	304	27	456
560	0.0004412	206	328	22	444
561	0.0004339	185	312	19	439
562	0.0004388	187	331	20	464
563	0.0004275	210	323	23	412
564	0.000392	127	280	25	398
565	0.0004369	206	313	20	410
566	0.0004311	229	338	28	447
567	0.0004354	103	287	29	445
568	0.000434	121	334	26	445
569	0.0004278	169	309	24	427
570	0.0004338	190	287	19	384
571	0.00044	106	292	26	415
572	0.0004279	188	323	27	425
573	0.0004459	87	324	24	464
574	0.000434	204	322	22	434
575	0.0004327	158	313	19	410
576	0.0004267	82	288	28	450
577	0.0004345	188	319	22	450
578	0.0004269	187	322	22	441
579	0.0004645	122	313	23	432
580	0.0004603	228	323	29	417
581	0.0004237	191	323	25	441
582	0.0004233	187	325	24	420
583	0.0005032	191	331	23	459
584	0.0004544	78	295	25	442
585	0.000421	123	304	26	429
586	0.0004376	213	326	25	420
587	0.0004083	139	305	25	421
588	0.0004713	91	285	25	444
589	0.000461	16	296	25	431
590	0.0005258	158	319	25	443
591	0.0004252	127	298	25	402
592	0.000416	161	301	22	434
593	0.0004014	138	314	28	448
594	0.000434	141	293	24	421
595	0.0004271	240	320	27	400
596	0.0004365	200	302	21	404
597	0.0004341	157	313	27	436
598	0.0004051	189	316	26	443
599	0.0004315	268	343	22	418
600	0.000429	265	354	25	443
601	0.0004199	207	314	20	383
602	0.0004571	297	372	28	438
603	0.0004377	185	324	28	431
604	0.00045	194	316	22	419
605	0.0004223	188	335	25	438
606	0.0004404	224	322	26	420
607	0.0004337	209	329	22	429
608	0.000419	182	314	23	420
609	0.0004431	120	300	21	443
610	0.0004061	76	278	29	423
611	0.0004326	136	304	20	428
612	0.0004216	102	285	26	404
613	0.0004339	189	323	25	433
614	0.0004388	79	284	24	439
615	0.0004791	151	315	24	436
616	0.0004867	224	325	20	420
617	0.00047	30	302	28	458
618	0.0004483	135	295	25	436
619	0.0004322	239	336	25	433
620	0.000417	30	273	28	407
621	0.0004327	95	289	21	412
622	0.0004244	135	310	26	429
623	0.0004498	234	340	22	414
624	0.0004664	170	309	26	432
625	0.0004172	157	310	27	412
626	0.000439	121	310	19	393
627	0.0004859	186	340	22	454
628	0.000429	116	295	23	431
629	0.0004212	82	289	27	426
630	0.0004372	94	297	26	448
631	0.0004562	151	310	23	441
632	0.0004077	173	295	20	392
633	0.0003961	155	304	24	409
634	0.0004494	113	303	23	454
635	0.0004667	173	319	21	465
636	0.0005188	167	310	21	441
637	0.0004129	113	309	25	446
638	0.0004361	225	326	23	427
639	0.0004393	266	349	25	432
640	0.0004107	113	292	26	428
641	0.000437	175	304	26	413
642	0.0004541	221	350	26	447
643	0.0004226	231	345	26	445
644	0.0004161	136	294	26	405
645	0.0004404	174	303	23	425
646	0.0004028	85	281	23	447
647	0.0004432	177	330	21	452
648	0.0004123	158	300	26	412
649	0.0004551	177	324	29	471
650	0.0004329	276	338	19	400
651	0.0004274	91	308	27	449
652	0.0004294	185	304	19	420
653	0.0004232	136	313	25	418
654	0.0004275	164	327	28	457
655	0.0004401	102	301	22	428
656	0.0004697	24	277	27	437
657	0.0004306	161	301	20	439
658	0.0004305	151	294	26	407
659	0.0004413	199	331	21	463
660	0.0004759	216	339	21	440
661	0.0004381	259	339	23	419
662	0.0004612	193	320	21	438
663	0.0004556	109	302	26	456
664	0.0004205	155	314	23	446
665	0.0004209	243	329	24	413
666	0.0004285	270	345	27	420
667	0.0004259	195	297	21	399
668	0.0004526	136	314	25	434
669	0.0004674	177	306	27	420
670	0.0004476	132	289	21	397
671	0.0004447	147	307	24	433
672	0.0004649	157	309	24	451
673	0.0004237	214	333	23	451
674	0.0004185	188	301	28	414
675	0.0004276	157	312	29	443
676	0.0004996	173	319	24	440
677	0.0004508	189	314	25	419
678	0.0004228	175	317	21	423
679	0.0004335	102	307	26	447
680	0.0004327	170	335	26	478
681	0.0004285	156	306	24	405
682	0.000431	186	329	23	460
683	0.0004608	157	321	24	434
684	0.0004897	181	331	23	470
685	0.000424	87	286	22	423
686	0.0004311	145	294	22	436
687	0.0004207	163	317	27	430
688	0.0004325	93	294	27	429
689	0.0004068	87	288	19	395
690	0.0004141	155	318	28	442
691	0.0004416	210	319	27	412
692	0.000452	273	349	26	425
693	0.0005022	90	290	26	438
694	0.0004313	186	316	23	439
695	0.0004503	204	326	18	448
696	0.0004535	223	325	26	418
697	0.0004135	179	310	20	441
698	0.0004425	115	309	23	454
699	0.0005137	157	335	22	481
700	0.0004265	224	317	20	410
701	0.0004639	166	299	19	421
702	0.0004227	213	325	27	418
703	0.0004557	271	330	22	389
704	0.0004142	57	292	25	441
705	0.0004345	160	311	27	442
706	0.0004188	143	319	24	451
707	0.0004767	130	312	26	463
708	0.0004333	121	315	25	453
709	0.0004232	259	345	23	431
710	0.0004813	192	344	23	473
711	0.0004358	200	344	24	438
712	0.000477	118	299	23	446
713	0.0004544	234	332	27	430
714	0.0004436	238	323	24	408
715	0.0004193	183	311	25	439
716	0.0004305	169	321	25	432
717	0.000447	191	309	19	427
718	0.000455	196	330	28	464
719	0.0004239	111	312	26	444
720	0.0004186	153	306	25	418
721	0.0004203	199	309	21	414
722	0.0004193	111	284	24	427
723	0.0004973	110	305	26	436
724	0.0004616	191	318	25	440
725	0.0004484	155	317	29	479
726	0.0004411	151	299	24	424
727	0.0004344	282	357	23	432
728	0.0004375	185	320	23	430
729	0.0004396	129	298	23	420
730	0.0004236	144	315	25	417
731	0.0004391	131	309	21	425
732	0.0004351	89	298	29	439
733	0.000451	192	306	24	408
734	0.0004371	162	295	19	426
735	0.0004598	178	306	23	419
736	0.0004303	239	339	22	429
737	0.0004389	230	340	24	423
738	0.0004097	146	309	27	416
739	0.0004714	109	304	23	449
740	0.0004392	157	299	22	424
741	0.0004425	171	310	21	398
742	0.0004421	136	313	24	432
743	0.0004358	142	312	23	463
744	0.0004576	193	316	17	423
745	0.0005103	180	303	21	426
746	0.0004153	221	314	21	397
747	0.0004456	220	313	17	406
748	0.0004283	182	317	24	429
749	0.000423	113	303	23	476
750	0.0004188	135	318	24	431
751	0.0004244	188	307	23	416
752	0.0004357	196	328	26	460
753	0.0004919	237	339	25	433
754	0.0004435	120	303	26	405
755	0.0004338	76	297	28	455
756	0.0004486	142	307	24	437
757	0.00047	160	315	20	451
758	0.0004491	190	310	28	430
759	0.0004241	95	280	25	422
760	0.0004017	208	313	20	393
761	0.0004241	174	311	24	400
762	0.0004259	179	315	27	417
763	0.0004332	139	306	25	437
764	0.0005241	160	277	26	394
765	0.0004028	213	291	19	367
766	0.000413	60	303	28	444
767	0.0004521	172	336	21	488
768	0.0004541	192	321	23	423
769	0.000415	98	294	27	437
770	0.0004847	248	350	26	449
771	0.0004218	181	295	22	394
772	0.0004252	173	305	22	418
773	0.0004157	138	278	25	396
774	0.0004028	131	292	24	449
775	0.000421	140	299	26	424
776	0.0004003	118	286	25	402
777	0.000442	139	300	24	440
778	0.0004853	159	313	25	455
779	0.0004683	168	299	23	430
780	0.0004172	191	326	26	431
781	0.0004208	74	298	29	457
782	0.0004638	182	326	29	462
783	0.0004119	136	314	26	443
784	0.0003915	133	306	26	404
785	0.000452	159	319	27	479
786	0.0004228	217	326	25	429
787	0.0004076	75	280	25	409
788	0.0004508	120	295	25	428
789	0.0004492	161	300	20	431
790	0.0004476	231	348	28	432
791	0.0004164	169	298	19	407
792	0.0004579	219	337	24	446
793	0.0004386	166	316	23	452
794	0.0005266	158	334	23	473
795	0.0004209	185	321	20	423
796	0.0004773	177	324	23	471
797	0.0004198	169	306	20	413
798	0.0004143	133	309	23	424
799	0.0004025	125	289	27	435
800	0.0004663	201	319	25	437
801	0.0004246	227	337	21	447
802	0.0004079	159	303	22	435
803	0.0004612	228	342	21	454
804	0.0004413	223	334	25	433
805	0.0004519	255	328	19	401
806	0.0004533	139	323	25	470
807	0.0004602	171	317	21	437
808	0.000446	130	301	26	418
809	0.0004408	122	319	28	453
810	0.000426	167	321	26	426
811	0.0004335	279	354	23	429
812	0.0004329	102	299	27	414
813	0.0004521	160	306	27	402
814	0.0004438	102	299	22	425
815	0.0004147	176	318	25	418
816	0.0004104	65	276	27	421
817	0.0004487	182	301	19	412
818	0.0005229	193	326	21	451
819	0.0004763	220	335	23	422
820	0.0004197	160	310	23	431
821	0.0004444	168	309	22	440
822	0.0004408	128	310	21	412
823	0.0004238	217	337	20	439
824	0.0004364	209	314	20	419
825	0.0004063	155	294	22	409
826	0.0004857	126	303	20	425
827	0.000411	148	329	26	426
828	0.000423	148	318	20	459
829	0.0004461	188	320	24	413
830	0.000461	243	365	24	487
831	0.0004054	132	302	25	396
832	0.0004576	203	325	27	434
833	0.0004391	216	322	23	426
834	0.0004505	196	315	22	394
835	0.0004518	218	306	17	394
836	0.0004396	83	315	25	473
837	0.0004671	164	306	20	427
838	0.0004722	246	343	29	440
839	0.0004263	93	279	26	410
840	0.0004179	147	313	24	471
841	0.0004574	173	310	26	425
842	0.0004708	111	289	24	447
843	0.0004283	169	309	24	416
844	0.0004375	203	319	19	413
845	0.0004066	148	285	27	419
846	0.000452	30	268	28	393
847	0.0004969	125	327	25	422
848	0.0004189	142	292	25	417
849	0.0005141	146	312	26	448
850	0.0004222	137	326	26	433
851	0.0004675	241	344	23	445
852	0.0004588	126	304	27	445
853	0.0004391	155	293	26	397
854	0.0004138	128	297	25	418
855	0.0004531	216	334	24	447
856	0.0004307	229	328	19	406
857	0.0004369	180	330	27	450
858	0.0004202	204	323	20	419
859	0.0004404	190	310	22	430
860	0.0005071	122	321	27	469
861	0.000504	141	323	26	440
862	0.00043	107	314	25	458
863	0.0004538	217	324	23	420
864	0.00044	147	312	26	444
865	0.0004704	144	331	28	486
866	0.0004507	120	302	23	433
867	0.0004583	220	349	22	454
868	0.0004917	121	303	26	432
869	0.0004395	230	317	24	389
870	0.0004262	92	297	26	446
871	0.0004485	128	308	22	407
872	0.000472	149	305	24	432
873	0.0004568	172	298	23	422
874	0.0004888	124	311	27	453
875	0.0004824	193	327	27	447
876	0.000474	219	357	26	465
877	0.0004325	277	351	28	425
878	0.0004598	123	309	27	423
879	0.0004835	131	298	28	448
880	0.0005149	78	278	24	411
881	0.0004645	130	299	23	404
882	0.0005124	214	331	20	447
883	0.0004512	233	337	28	441
884	0.0004496	255	344	26	433
885	0.0004185	179	312	21	424
886	0.0004703	248	341	24	434
887	0.0004324	247	320	19	393
888	0.0004325	152	309	22	397
889	0.0004137	120	282	26	417
890	0.0004485	191	323	21	444
891	0.0005431	150	290	22	400
892	0.0004241	226	328	25	430
893	0.000439	119	291	25	427
894	0.0004342	207	341	26	451
895	0.0005732	216	324	19	399
896	0.0004364	201	326	25	443
897	0.000417	64	273	25	404
898	0.0004206	127	303	23	434
899	0.0004652	123	296	28	409
900	0.0004334	144	307	24	427
901	0.0004202	180	306	24	405
902	0.0004505	138	310	24	432
903	0.0004122	150	309	22	419
904	0.0004462	183	315	28	443
905	0.0004184	138	298	24	413
906	0.0004348	213	328	22	416
907	0.0004724	152	297	20	442
908	0.0004079	45	282	25	436
909	0.0004534	224	326	19	423
910	0.0004251	214	336	27	426
911	0.00042	163	320	26	428
912	0.0004266	244	330	25	416
913	0.0005354	54	289	27	460
914	0.0004857	206	332	23	458
915	0.0004307	94	288	26	430
916	0.0004253	142	289	22	405
917	0.0004109	97	316	26	442
918	0.0004726	180	302	27	424
919	0.0004059	201	290	19	379
920	0.0004645	124	298	23	457
921	0.0004317	153	315	21	459
922	0.0004427	221	335	21	448
923	0.000406	61	281	28	444
924	0.000454	114	309	24	436
925	0.000459	245	328	23	411
926	0.0004554	133	314	21	440
927	0.0004465	132	304	28	462
928	0.0004444	153	309	28	458
929	0.0004847	234	334	25	434
930	0.0004196	267	331	23	395
931	0.0005019	202	334	25	446
932	0.0005289	141	326	28	476
933	0.0004195	90	284	25	389
934	0.0004546	140	288	21	417
935	0.0004493	122	284	24	419
936	0.0004352	179	316	20	420
937	0.0004691	183	326	28	450
938	0.0004083	112	290	27	407
939	0.0004412	175	291	25	378
940	0.0004513	213	337	23	451
941	0.000449	69	305	23	508
942	0.0004506	170	304	20	417
943	0.0004207	142	311	28	441
944	0.0004287	119	314	23	469
945	0.0004219	188	302	20	399
946	0.0004455	182	323	25	450
947	0.0004097	163	298	19	433
948	0.0004568	165	314	25	463
949	0.000421	143	295	21	431
950	0.0004717	217	348	23	450
951	0.000432	174	324	22	414
952	0.0004129	108	298	23	423
953	0.00048	183	322	23	426
954	0.0004671	65	296	25	470
955	0.0004316	180	327	24	441
956	0.0004648	146	302	25	409
957	0.0004374	164	313	21	427
958	0.0005174	75	294	27	449
959	0.0004788	239	332	29	425
960	0.0004393	218	311	20	404
961	0.0004616	166	300	27	429
962	0.0004371	113	299	27	449
963	0.0005004	165	312	25	417
964	0.0005059	184	324	22	427
965	0.0004559	131	328	26	437
966	0.0004131	132	307	20	461
967	0.0004191	176	302	24	382
968	0.0004075	87	305	28	450
969	0.0003963	150	290	23	430
970	0.0004121	220	292	19	364
971	0.0005059	176	299	24	395
972	0.0004482	150	309	23	424
973	0.0004679	126	329	29	470
974	0.0004005	120	293	24	431
975	0.000436	137	305	26	435
976	0.0004096	149	297	23	400
977	0.000447	199	317	21	424
978	0.0004633	131	324	25	462
979	0.0004654	199	319	18	422
980	0.0004787	169	300	21	430
981	0.000424	137	300	25	456
982	0.0004491	127	303	26	448
983	0.0004653	212	329	25	437
984	0.0004457	187	325	21	447
985	0.00057	80	305	23	467
986	0.0004734	78	292	24	420
987	0.0004405	251	344	28	437
988	0.0004205	108	301	28	429
989	0.0005105	205	321	28	430
990	0.0004954	96	293	28	444
991	0.0004151	85	283	26	439
992	0.0004874	172	310	18	434
993	0.0004173	191	309	21	412
994	0.0004108	45	268	25	414
995	0.0004288	176	312	18	422
996	0.0004694	186	330	25	457
997	0.0004244	217	325	22	429
998	0.0004262	244	333	24	422
999	0.0004727	93	289	22	395
mean	0.000443283	163.772	312.119	23.883	430.171

## Sheet: PolyMin_SEq
	time	SEq	Bal	Reg	Egal
0	0.0031285	218	317	26	416
1	0.0032912	248	321	23	394
2	0.0032211	245	344	21	443
3	0.0027348	205	315	18	425
4	0.0034809	234	330	24	426
5	0.0032187	306	345	24	384
6	0.0033565	182	308	23	434
7	0.0031862	252	344	24	436
8	0.0032266	214	311	25	408
9	0.003134	223	333	25	443
10	0.0030409	210	333	20	456
11	0.0033481	133	301	25	469
12	0.0034393	177	294	22	411
13	0.0032829	111	315	26	519
14	0.0032039	254	323	20	392
15	0.0030949	204	327	21	450
16	0.0030869	222	338	24	454
17	0.00331	165	302	25	439
18	0.0032319	149	293	19	437
19	0.0032158	198	313	21	428
20	0.0032579	245	319	23	393
21	0.0031083	136	301	23	466
22	0.0031469	189	325	21	461
23	0.0031227	218	328	21	438
24	0.0035249	185	329	21	473
25	0.0030672	166	320	24	474
26	0.0033899	147	297	21	447
27	0.0033159	194	299	21	404
28	0.0031789	187	316	22	445
29	0.0033365	212	331	18	450
30	0.0030685	243	335	25	427
31	0.003398	142	295	20	448
32	0.0033065	195	329	25	463
33	0.0031232	217	313	19	409
34	0.0029722	186	308	29	430
35	0.0032182	162	298	20	434
36	0.0030026	196	297	23	398
37	0.0030896	220	324	20	428
38	0.0031969	151	318	21	485
39	0.0032982	210	327	20	444
40	0.0032366	93	267	20	441
41	0.0032739	217	329	18	441
42	0.0031296	184	324	23	464
43	0.0034022	96	281	22	466
44	0.003137	255	348	25	441
45	0.0032901	207	333	22	459
46	0.0031171	220	323	20	426
47	0.0031099	213	331	21	449
48	0.0032441	190	309	21	428
49	0.0033256	241	328	26	415
50	0.0030532	209	320	19	431
51	0.0034397	198	314	18	430
52	0.0031047	172	287	21	402
53	0.0030242	209	328	25	447
54	0.0032384	143	309	27	475
55	0.0030628	273	352	27	431
56	0.0034064	164	303	21	442
57	0.0031156	236	313	24	390
58	0.0030938	174	315	20	456
59	0.0032201	232	329	21	426
60	0.0033099	135	311	23	487
61	0.0031689	174	306	20	438
62	0.0033779	172	291	22	410
63	0.0031478	189	309	29	429
64	0.0032112	265	335	20	405
65	0.0033134	243	338	22	433
66	0.0032099	235	332	24	429
67	0.0034464	142	329	23	516
68	0.0030448	169	298	29	427
69	0.0033479	247	328	18	409
70	0.0029144	217	328	24	439
71	0.0029112	297	351	29	405
72	0.0030718	249	340	23	431
73	0.0031566	251	346	21	441
74	0.0029133	210	318	23	426
75	0.0028108	232	322	20	412
76	0.0030666	236	333	22	430
77	0.0034437	155	326	29	497
78	0.0034063	190	308	21	426
79	0.003234	234	317	21	400
80	0.003039	265	348	21	431
81	0.0033431	250	343	23	436
82	0.0030227	219	314	20	409
83	0.0031784	223	319	21	415
84	0.0030995	180	304	21	428
85	0.0031666	275	359	25	443
86	0.0033617	106	278	20	450
87	0.003372	136	304	20	472
88	0.0031103	204	306	18	408
89	0.0032592	306	377	25	448
90	0.003095	270	347	22	424
91	0.0031572	136	295	22	454
92	0.0033554	188	327	20	466
93	0.0030762	240	325	23	410
94	0.0031745	285	344	27	403
95	0.0030893	142	307	24	472
96	0.0033227	249	348	21	447
97	0.0030729	216	319	23	422
98	0.0032684	154	309	24	464
99	0.0033118	194	322	23	450
100	0.00327	222	320	20	418
101	0.003304	153	328	21	503
102	0.0034538	211	316	18	421
103	0.0031569	124	292	26	460
104	0.0030031	226	348	29	470
105	0.0031185	290	365	28	440
106	0.0031605	259	358	25	457
107	0.0031061	204	327	26	450
108	0.0031669	180	318	25	456
109	0.0032577	191	334	22	477
110	0.0033822	280	363	27	446
111	0.0033385	102	308	27	514
112	0.0031141	242	319	23	396
113	0.0033511	182	318	20	454
114	0.003245	165	288	16	411
115	0.0029783	313	368	23	423
116	0.0029763	220	341	24	462
117	0.0031026	263	357	21	451
118	0.003192	181	311	20	441
119	0.0033338	204	311	21	418
120	0.0029863	277	341	29	405
121	0.0033809	221	319	22	417
122	0.0036278	232	343	21	454
123	0.0032892	232	345	22	458
124	0.0033439	257	355	24	453
125	0.0033092	215	318	24	421
126	0.0033055	142	308	26	474
127	0.00301	159	311	24	463
128	0.0031772	221	338	22	455
129	0.0031261	209	314	19	419
130	0.0030136	248	316	22	384
131	0.0030947	205	321	27	437
132	0.0030533	226	345	20	464
133	0.0032307	183	296	23	409
134	0.0035049	217	321	25	425
135	0.0032082	193	325	19	457
136	0.0032019	255	322	22	389
137	0.0031808	174	298	18	422
138	0.0031098	196	323	24	450
139	0.0033323	255	329	23	403
140	0.0031991	267	353	21	439
141	0.0028876	258	328	18	398
142	0.0035183	244	336	23	428
143	0.0033157	221	343	23	465
144	0.0030967	295	360	20	425
145	0.0033317	203	321	22	439
146	0.0030604	219	315	20	411
147	0.003204	221	329	20	437
148	0.0029122	241	341	25	441
149	0.0029955	200	328	24	456
150	0.003143	266	360	23	454
151	0.0029924	188	312	28	436
152	0.003048	256	332	22	408
153	0.003268	275	358	29	441
154	0.0033136	91	299	23	507
155	0.0030922	153	300	28	447
156	0.0031688	128	304	28	480
157	0.0035469	227	329	20	431
158	0.00317	214	317	20	420
159	0.0033481	186	314	20	442
160	0.0031107	157	303	26	449
161	0.0031319	189	332	23	475
162	0.0033121	215	326	20	437
163	0.0032098	237	319	23	401
164	0.0031179	275	365	25	455
165	0.0031499	170	299	21	428
166	0.0030649	146	296	23	446
167	0.0032548	222	325	23	428
168	0.0030499	206	328	24	450
169	0.0031447	245	341	23	437
170	0.0032649	278	352	26	426
171	0.0034328	218	338	20	458
172	0.0033021	161	309	21	457
173	0.0031113	303	359	25	415
174	0.0032636	172	293	16	414
175	0.0032935	251	331	25	411
176	0.0029301	288	335	18	382
177	0.0027925	259	339	27	419
178	0.0031111	205	343	26	481
179	0.0034623	252	339	23	426
180	0.0032622	168	306	21	444
181	0.0029608	281	344	26	407
182	0.0029789	164	302	25	440
183	0.0031929	150	281	19	412
184	0.0032726	192	318	19	444
185	0.0036406	181	299	21	417
186	0.0033389	262	347	25	432
187	0.0030737	231	352	23	473
188	0.0033024	224	330	21	436
189	0.0031009	213	332	24	451
190	0.0030578	226	325	25	424
191	0.0029274	278	350	23	422
192	0.0030113	167	317	22	467
193	0.0032647	192	330	21	468
194	0.003642	166	314	20	462
195	0.0035274	186	334	22	482
196	0.0037656	181	316	20	451
197	0.0036145	223	331	20	439
198	0.0031416	184	306	19	428
199	0.003193	164	329	21	494
200	0.0033681	236	336	22	436
201	0.0033499	184	317	19	450
202	0.0032248	263	340	21	417
203	0.0033105	269	343	25	417
204	0.0032183	210	329	22	448
205	0.0035173	162	305	21	448
206	0.0028282	262	358	29	454
207	0.0033211	142	317	22	492
208	0.003254	231	328	21	425
209	0.0032244	265	335	26	405
210	0.0033543	189	314	22	439
211	0.0034384	195	315	23	435
212	0.0033453	158	318	24	478
213	0.0034785	199	332	26	465
214	0.0033468	272	360	20	448
215	0.0030144	288	358	26	428
216	0.0029679	219	335	27	451
217	0.0031268	190	296	21	402
218	0.0029533	221	323	20	425
219	0.0030973	233	333	24	433
220	0.0035742	200	315	21	430
221	0.0031898	222	327	24	432
222	0.0033439	239	341	21	443
223	0.0031626	190	307	19	424
224	0.0034376	154	301	19	448
225	0.003371	190	304	22	418
226	0.0031546	244	316	21	388
227	0.0029741	238	310	20	382
228	0.002802	170	306	25	442
229	0.0033437	209	331	21	453
230	0.0031263	279	344	21	409
231	0.0030279	215	314	24	413
232	0.0030571	171	308	20	445
233	0.0032757	302	363	22	424
234	0.003306	190	301	20	412
235	0.0031051	174	304	22	434
236	0.0033016	208	318	21	428
237	0.0027869	299	366	25	433
238	0.0031242	290	347	23	404
239	0.0033834	225	344	24	463
240	0.0032905	188	314	21	440
241	0.0031822	228	321	22	414
242	0.0032867	185	299	20	413
243	0.0030664	208	316	21	424
244	0.0034732	229	324	20	419
245	0.0030286	183	307	22	431
246	0.0032432	108	269	28	430
247	0.0033448	232	347	23	462
248	0.0032097	221	329	23	437
249	0.0031644	174	315	21	456
250	0.0032913	162	308	28	454
251	0.0034615	141	301	19	461
252	0.0033799	182	304	21	426
253	0.0033743	195	339	23	483
254	0.0030846	175	299	21	423
255	0.0031181	146	302	21	458
256	0.0031843	191	324	20	457
257	0.0029938	186	309	25	432
258	0.0031418	177	320	25	463
259	0.0033432	137	294	22	451
260	0.002992	258	339	26	420
261	0.0029896	265	357	25	449
262	0.0030182	225	338	23	451
263	0.0032975	222	323	21	424
264	0.0031589	198	312	19	426
265	0.0032347	222	333	19	444
266	0.0030785	238	340	27	442
267	0.00303	270	358	22	446
268	0.0034212	140	307	19	474
269	0.0031654	206	313	20	420
270	0.0032974	164	310	21	456
271	0.0031046	142	308	24	474
272	0.0035292	198	322	25	446
273	0.0038685	223	354	24	485
274	0.0029535	288	347	23	406
275	0.003713	175	323	20	471
276	0.0029871	256	349	29	442
277	0.0030112	262	330	21	398
278	0.0034167	227	342	20	457
279	0.0030338	283	343	21	403
280	0.0033468	192	309	21	426
281	0.0029493	190	317	19	444
282	0.0032362	228	344	22	460
283	0.0029442	239	329	24	419
284	0.0030171	205	302	27	399
285	0.0033271	186	320	21	454
286	0.0031618	226	316	20	406
287	0.0030735	162	323	25	484
288	0.0031789	292	360	22	428
289	0.0033164	205	322	21	439
290	0.0033203	245	343	23	441
291	0.0031031	263	332	22	401
292	0.0030487	223	332	20	441
293	0.0033331	257	346	23	435
294	0.0032621	193	313	19	433
295	0.0031317	240	330	22	420
296	0.0032074	299	362	26	425
297	0.0033933	178	327	21	476
298	0.0026393	254	328	21	402
299	0.0032367	204	319	21	434
300	0.0035934	87	302	23	517
301	0.0031024	147	321	26	495
302	0.0030988	279	364	22	449
303	0.0032934	196	321	20	446
304	0.0032181	148	313	22	478
305	0.0034162	201	319	18	437
306	0.0031265	174	319	23	464
307	0.0031428	251	352	25	453
308	0.0032385	193	306	21	419
309	0.003545	154	290	20	426
310	0.0031916	266	356	27	446
311	0.0034875	236	338	20	440
312	0.0033397	228	316	22	404
313	0.0034605	185	329	24	473
314	0.0030891	174	300	23	426
315	0.0029926	240	316	25	392
316	0.0030228	171	293	23	415
317	0.0031669	197	293	16	389
318	0.0027083	309	350	26	391
319	0.0030012	189	319	19	449
320	0.002944	257	345	25	433
321	0.0031417	189	311	24	433
322	0.0031748	218	326	20	434
323	0.0033693	160	305	19	450
324	0.0031787	209	327	27	445
325	0.0030927	131	303	21	475
326	0.0030101	175	314	19	453
327	0.0034118	171	313	20	455
328	0.0030619	192	310	26	428
329	0.0032711	123	288	20	453
330	0.0030642	255	347	23	439
331	0.0033932	259	359	23	459
332	0.0034864	238	333	25	428
333	0.0031987	190	322	19	454
334	0.0029667	257	328	22	399
335	0.0032281	267	352	21	437
336	0.002927	300	360	23	420
337	0.0032601	116	301	22	486
338	0.0031722	214	319	20	424
339	0.0031044	196	301	19	406
340	0.0031054	249	339	23	429
341	0.0034538	203	313	23	423
342	0.0031602	205	307	21	409
343	0.0031931	190	322	23	454
344	0.0031075	136	307	24	478
345	0.0032456	254	341	27	428
346	0.0033227	258	357	23	456
347	0.0032379	230	327	22	424
348	0.0033327	209	325	21	441
349	0.0031726	191	312	24	433
350	0.0034221	80	304	26	528
351	0.0029879	252	347	21	442
352	0.0032652	215	322	22	429
353	0.0030468	195	305	22	415
354	0.0031226	249	316	19	383
355	0.0030444	257	334	21	411
356	0.0032607	202	330	22	458
357	0.0034857	198	331	20	464
358	0.0031754	180	290	25	400
359	0.0031752	213	313	22	413
360	0.0029642	211	333	26	455
361	0.0030182	251	334	19	417
362	0.0030179	254	337	21	420
363	0.003026	245	331	23	417
364	0.0036937	275	368	27	461
365	0.0031125	181	312	22	443
366	0.0030982	224	318	19	412
367	0.0036168	129	280	21	431
368	0.0031849	307	362	27	417
369	0.0032052	251	351	22	451
370	0.003328	184	320	21	456
371	0.0034283	190	322	21	454
372	0.0032015	203	334	20	465
373	0.0033805	122	305	23	488
374	0.0033192	186	333	19	480
375	0.0032605	209	316	22	423
376	0.0032416	181	330	22	479
377	0.0034419	127	301	22	475
378	0.0030793	260	331	28	402
379	0.0035467	226	337	21	448
380	0.0030267	244	315	20	386
381	0.0033313	203	316	19	429
382	0.0031491	164	303	28	442
383	0.0031942	229	333	24	437
384	0.0034835	194	321	20	448
385	0.0031035	194	292	24	390
386	0.0033877	250	354	22	458
387	0.00353	112	287	23	462
388	0.0035196	182	335	21	488
389	0.002931	199	326	21	453
390	0.0030905	163	298	26	433
391	0.0032374	216	319	18	422
392	0.0030445	224	309	22	394
393	0.0032882	208	316	26	424
394	0.003076	206	320	23	434
395	0.0028708	274	363	22	452
396	0.003345	258	338	25	418
397	0.003111	282	352	19	422
398	0.0033535	224	329	21	434
399	0.0033105	87	300	21	513
400	0.003236	174	313	20	452
401	0.0032769	144	296	22	448
402	0.0032141	264	360	26	456
403	0.0030529	224	310	19	396
404	0.0030007	182	305	23	428
405	0.0033754	269	369	24	469
406	0.0033824	208	314	19	420
407	0.0029786	286	343	25	400
408	0.0031246	140	300	21	460
409	0.0032049	138	305	21	472
410	0.0031322	193	321	20	449
411	0.0031331	247	343	26	439
412	0.0029811	193	324	26	455
413	0.003038	170	301	22	432
414	0.0030642	150	302	24	454
415	0.0029414	198	313	17	428
416	0.0029746	233	324	23	415
417	0.0029944	312	357	26	402
418	0.0031433	185	313	21	441
419	0.0032722	259	341	23	423
420	0.0031366	215	312	22	409
421	0.0032718	195	312	23	429
422	0.0030235	239	322	21	405
423	0.0031584	237	333	20	429
424	0.0032539	247	332	24	417
425	0.0030836	237	338	20	439
426	0.0033339	211	319	18	427
427	0.0031067	201	328	28	455
428	0.0027375	192	326	24	460
429	0.0033783	175	325	21	475
430	0.0032472	238	348	20	458
431	0.0031245	176	315	20	454
432	0.0032789	102	280	24	458
433	0.0031521	215	331	23	447
434	0.0031296	193	321	23	449
435	0.0033772	202	325	25	448
436	0.0033332	187	326	20	465
437	0.0035062	187	301	26	415
438	0.0033946	192	308	21	424
439	0.0033814	150	303	20	456
440	0.0030911	181	299	21	417
441	0.0032871	109	280	25	451
442	0.0028608	330	387	26	444
443	0.0032235	189	322	20	455
444	0.0031326	181	328	20	475
445	0.003122	227	344	25	461
446	0.0031529	212	317	18	422
447	0.0026683	251	334	28	417
448	0.0029156	252	345	25	438
449	0.0031545	290	365	26	440
450	0.0031637	181	327	24	473
451	0.0033599	190	320	18	450
452	0.003216	208	331	27	454
453	0.0034733	172	319	20	466
454	0.0034006	317	373	25	429
455	0.0039188	189	339	24	489
456	0.0031472	159	306	21	453
457	0.0034563	179	318	20	457
458	0.0032282	257	338	23	419
459	0.0030262	197	300	21	403
460	0.0034343	94	296	26	498
461	0.0031639	122	299	22	476
462	0.0033134	210	305	22	400
463	0.0031951	145	305	27	465
464	0.002714	242	344	24	446
465	0.0030903	200	286	18	372
466	0.0030815	168	296	18	424
467	0.0033134	240	316	22	392
468	0.0030244	197	321	27	445
469	0.0030966	276	357	25	438
470	0.0031251	259	348	27	437
471	0.0032724	288	361	22	434
472	0.0032768	226	319	20	412
473	0.0032039	159	305	23	451
474	0.0028529	279	359	24	439
475	0.003359	231	344	20	457
476	0.0031951	234	321	20	408
477	0.0033005	188	317	19	446
478	0.0030208	201	319	25	437
479	0.0030996	194	314	18	434
480	0.0033693	251	338	20	425
481	0.0031641	163	308	21	453
482	0.0030604	160	301	23	442
483	0.0031326	187	316	22	445
484	0.0034721	177	307	22	437
485	0.0037098	141	304	21	467
486	0.0032098	209	328	21	447
487	0.0031067	147	318	24	489
488	0.0031702	225	333	20	441
489	0.0030253	178	332	24	486
490	0.0031025	168	321	26	474
491	0.0035091	225	323	22	421
492	0.0032928	179	299	18	419
493	0.0032542	136	299	22	462
494	0.0030536	259	344	24	429
495	0.0031752	147	320	21	493
496	0.0034479	96	297	26	498
497	0.0034092	238	340	18	442
498	0.003169	210	341	27	472
499	0.0030944	211	345	22	479
500	0.0031426	233	339	26	445
501	0.0032256	266	354	22	442
502	0.0032309	177	303	24	429
503	0.0030758	197	326	26	455
504	0.0033247	186	316	24	446
505	0.0034055	180	295	20	410
506	0.0032875	297	352	26	407
507	0.0034789	216	335	25	454
508	0.0032848	239	342	23	445
509	0.0034783	250	321	25	392
510	0.003126	239	320	22	401
511	0.0029795	253	343	24	433
512	0.0033062	234	333	21	432
513	0.0033875	179	321	20	463
514	0.0033384	194	318	22	442
515	0.0032026	270	346	20	422
516	0.0030507	242	328	23	414
517	0.0031236	227	343	21	459
518	0.0030329	239	317	23	395
519	0.0030742	293	370	23	447
520	0.0027624	282	350	20	418
521	0.0033137	195	319	24	443
522	0.0037267	162	323	18	484
523	0.0046557	165	315	24	465
524	0.0033521	128	286	25	444
525	0.0032954	270	344	24	418
526	0.0033698	223	308	23	393
527	0.0030828	187	315	20	443
528	0.0033694	172	325	24	478
529	0.0033233	160	304	20	448
530	0.0030857	152	329	21	506
531	0.0032044	203	327	19	451
532	0.003339	235	319	21	403
533	0.0032469	177	312	20	447
534	0.0035093	238	336	23	434
535	0.0031805	201	308	21	415
536	0.0032397	229	332	23	435
537	0.0034447	181	329	24	477
538	0.0030902	203	346	24	489
539	0.003351	191	326	20	461
540	0.0032864	253	332	26	411
541	0.0034351	222	339	20	456
542	0.0032851	251	335	23	419
543	0.0032168	242	325	23	408
544	0.0031873	203	323	19	443
545	0.0032369	192	318	20	444
546	0.0034285	312	378	25	444
547	0.0027363	192	291	21	390
548	0.0031005	203	319	26	435
549	0.0038304	180	314	21	448
550	0.0027414	249	356	24	463
551	0.0034488	231	337	25	443
552	0.0031275	208	313	23	418
553	0.0033247	246	333	21	420
554	0.0032756	185	321	27	457
555	0.0033281	172	301	21	430
556	0.0035547	229	334	25	439
557	0.002942	204	310	20	416
558	0.0033005	123	321	23	519
559	0.003751	285	367	27	449
560	0.0030844	266	355	22	444
561	0.0031279	185	312	19	439
562	0.0032301	187	331	20	475
563	0.0030271	210	323	23	436
564	0.0034772	202	300	18	398
565	0.0032123	206	313	20	420
566	0.0030621	238	342	28	446
567	0.0033117	240	327	23	414
568	0.0034563	230	347	23	464
569	0.0031212	211	323	21	435
570	0.0027534	190	287	19	384
571	0.003335	235	332	21	429
572	0.0034692	222	329	24	436
573	0.0034015	221	359	24	497
574	0.0030633	223	333	22	443
575	0.0030782	246	328	19	410
576	0.0033591	139	296	23	453
577	0.0030236	188	319	22	450
578	0.0032857	202	329	21	456
579	0.0032557	122	313	23	504
580	0.0031439	239	328	29	417
581	0.0030458	226	340	24	454
582	0.0030805	187	325	24	463
583	0.0033108	245	352	23	459
584	0.0033877	199	330	21	461
585	0.0033113	305	367	26	429
586	0.0032514	263	344	25	425
587	0.0033696	211	328	19	445
588	0.0034835	164	307	21	450
589	0.0035204	203	333	19	463
590	0.0032449	243	333	21	423
591	0.0034672	265	335	23	405
592	0.0033171	184	308	22	432
593	0.0034042	171	323	26	475
594	0.003299	141	293	24	445
595	0.0028436	240	320	27	400
596	0.0031874	200	302	21	404
597	0.0031411	193	330	25	467
598	0.0032832	189	316	26	443
599	0.003069	286	351	22	416
600	0.0030867	265	354	25	443
601	0.0030354	207	314	20	421
602	0.0028785	330	384	28	438
603	0.0033818	258	336	20	414
604	0.0033073	194	316	22	438
605	0.0031852	222	341	21	460
606	0.0031874	264	338	26	412
607	0.0034203	209	329	22	449
608	0.0032175	182	314	23	446
609	0.003447	205	324	21	443
610	0.0034993	131	283	24	435
611	0.0032832	167	309	20	451
612	0.003331	102	285	26	468
613	0.0030069	222	331	24	440
614	0.0033342	96	293	23	490
615	0.0031589	181	318	21	455
616	0.0030169	224	325	20	426
617	0.0034575	247	356	27	465
618	0.0033337	209	311	21	413
619	0.0029159	239	336	25	433
620	0.0033775	181	300	24	419
621	0.003228	162	306	19	450
622	0.0030528	135	310	26	485
623	0.0030681	306	363	22	420
624	0.0031678	220	326	21	432
625	0.0031606	202	321	26	440
626	0.0032063	267	330	19	393
627	0.0030673	242	348	22	454
628	0.0034838	155	307	22	459
629	0.00346	194	314	20	434
630	0.0033383	230	346	25	462
631	0.0033825	151	310	23	469
632	0.0031003	173	295	20	417
633	0.0033826	173	307	21	441
634	0.0030926	208	331	23	454
635	0.0033874	220	342	21	464
636	0.0032266	167	310	21	453
637	0.0034923	197	332	23	467
638	0.0034162	225	326	23	427
639	0.0028551	266	349	25	432
640	0.003151	113	292	26	471
641	0.0033677	206	313	19	420
642	0.0031851	277	358	26	439
643	0.0036186	231	345	26	459
644	0.0033214	259	331	23	403
645	0.0030094	231	328	23	425
646	0.0036256	148	291	19	434
647	0.0034476	177	330	21	483
648	0.003377	188	312	21	436
649	0.003009	177	324	29	471
650	0.0031074	276	338	19	400
651	0.0033878	229	354	26	479
652	0.0031286	185	304	19	423
653	0.0031786	283	361	24	439
654	0.0033442	213	350	26	487
655	0.0031947	258	342	21	426
656	0.0034875	159	292	19	425
657	0.0031321	161	301	20	441
658	0.003187	272	338	26	404
659	0.0030468	199	331	21	463
660	0.0030315	306	373	21	440
661	0.0027518	259	339	23	419
662	0.0031291	193	320	21	447
663	0.0033957	244	338	21	432
664	0.0032294	207	327	21	447
665	0.0032919	262	336	24	410
666	0.002676	270	345	27	420
667	0.0027001	195	297	21	399
668	0.0034241	216	327	22	438
669	0.003281	177	306	27	435
670	0.0031857	241	319	21	397
671	0.003384	157	310	23	463
672	0.0032866	157	309	24	461
673	0.0031845	242	345	23	448
674	0.0030981	188	301	28	414
675	0.0032045	241	331	20	421
676	0.0032447	197	329	19	461
677	0.0032986	189	314	25	439
678	0.0031798	232	331	21	430
679	0.003211	247	345	26	443
680	0.0032696	205	341	25	477
681	0.0032261	196	310	19	424
682	0.0031584	186	329	23	472
683	0.0032842	290	362	24	434
684	0.0030886	181	331	23	481
685	0.003268	262	344	22	426
686	0.0031683	145	294	22	443
687	0.0032167	298	364	27	430
688	0.0033187	141	299	25	457
689	0.0032317	239	317	19	395
690	0.0031538	155	318	28	481
691	0.0031242	239	327	24	415
692	0.00285	273	349	26	425
693	0.0032277	215	324	23	433
694	0.0031697	186	316	23	446
695	0.0031129	204	326	18	448
696	0.0032017	262	341	26	420
697	0.0031712	179	310	20	441
698	0.0030713	216	335	23	454
699	0.0030648	231	356	22	481
700	0.0031885	224	317	20	410
701	0.0032837	183	304	19	425
702	0.0030528	270	342	27	414
703	0.0027521	271	330	22	389
704	0.0035567	187	319	20	451
705	0.0032304	188	315	25	442
706	0.003124	143	319	24	495
707	0.0034449	225	333	21	441
708	0.0033335	254	346	23	438
709	0.00321	259	345	23	431
710	0.0032876	246	364	21	482
711	0.0030733	272	367	21	462
712	0.0031802	179	317	20	455
713	0.0028559	234	332	27	430
714	0.0030304	238	323	24	408
715	0.0033006	202	317	22	432
716	0.0033111	213	335	20	457
717	0.0030083	191	309	19	427
718	0.003092	196	330	28	464
719	0.0031361	111	312	26	513
720	0.0031439	199	312	18	425
721	0.0029899	199	309	21	419
722	0.0033402	167	308	22	449
723	0.0034108	298	360	21	422
724	0.0031449	211	324	25	437
725	0.0027384	155	317	29	479
726	0.0034311	244	328	20	412
727	0.0029733	282	357	23	432
728	0.0031434	185	320	23	455
729	0.0031967	152	302	22	452
730	0.0032026	261	339	25	417
731	0.0031328	217	321	21	425
732	0.0034274	215	323	21	431
733	0.0030866	192	306	24	420
734	0.0031944	162	295	19	428
735	0.0031628	178	306	23	434
736	0.0030888	239	339	22	439
737	0.0030775	230	340	24	450
738	0.0032021	206	318	21	430
739	0.0030978	197	328	22	459
740	0.0032153	157	299	22	441
741	0.0032254	261	332	20	403
742	0.0032021	298	365	24	432
743	0.0033268	142	312	23	482
744	0.0037285	193	316	17	439
745	0.0029194	180	303	21	426
746	0.0030752	221	314	21	407
747	0.0029072	220	313	17	406
748	0.0031189	233	343	21	453
749	0.0033534	113	303	23	493
750	0.0032769	316	370	21	424
751	0.0032672	241	327	21	413
752	0.0030895	196	328	26	460
753	0.00294	289	361	25	433
754	0.0033474	269	339	22	409
755	0.0034337	181	326	25	471
756	0.0030062	211	324	24	437
757	0.003297	184	321	19	458
758	0.0028517	190	310	28	430
759	0.0032192	192	310	20	428
760	0.0030183	208	313	20	418
761	0.0033028	241	336	23	431
762	0.0031977	221	320	22	419
763	0.0032236	199	318	20	437
764	0.0036636	188	291	24	394
765	0.0031622	213	291	19	369
766	0.0033788	216	336	23	456
767	0.0034512	220	344	21	468
768	0.0030588	192	321	23	450
769	0.0035551	250	338	22	426
770	0.0032672	248	350	26	452
771	0.0030897	213	302	22	391
772	0.0030639	173	305	22	437
773	0.0032786	182	293	22	404
774	0.0035026	166	304	18	442
775	0.0033632	226	320	22	414
776	0.0031679	199	307	19	415
777	0.0035601	161	311	22	461
778	0.0030868	191	323	25	455
779	0.0032851	168	299	23	430
780	0.0032181	254	357	23	460
781	0.0035845	249	347	25	445
782	0.0030936	210	336	29	462
783	0.0032123	220	336	24	452
784	0.0033641	261	337	21	413
785	0.002817	159	319	27	479
786	0.0029443	217	326	25	435
787	0.0035011	204	314	19	424
788	0.0033072	199	307	18	415
789	0.0031301	204	311	20	418
790	0.0030948	231	348	28	465
791	0.0032615	169	298	19	427
792	0.0031051	240	346	24	452
793	0.0031333	201	325	22	449
794	0.0030851	247	360	23	473
795	0.0030696	185	321	20	457
796	0.0029094	177	324	23	471
797	0.0033774	169	306	20	443
798	0.0034044	258	345	20	432
799	0.0032232	208	311	18	414
800	0.0029541	201	319	25	437
801	0.0034543	259	350	21	441
802	0.0033421	159	303	22	447
803	0.0031575	228	342	21	456
804	0.0030344	271	352	25	433
805	0.0027144	255	328	19	401
806	0.003144	272	371	25	470
807	0.0032343	171	317	21	463
808	0.0032893	177	308	18	439
809	0.0034707	292	375	22	458
810	0.0032095	167	321	26	475
811	0.0029883	279	354	23	429
812	0.0031667	176	311	22	446
813	0.0033896	211	316	24	421
814	0.0033596	248	335	22	422
815	0.0032048	252	339	23	426
816	0.0032665	143	301	24	459
817	0.0030685	182	301	19	420
818	0.0031448	193	326	21	459
819	0.0030776	295	358	23	421
820	0.003117	160	310	23	460
821	0.0031642	187	314	20	441
822	0.0032447	270	341	21	412
823	0.0034617	217	337	20	457
824	0.0033923	229	319	20	409
825	0.0031507	213	306	19	399
826	0.003586	126	303	20	480
827	0.0034988	227	347	22	467
828	0.0032721	148	318	20	488
829	0.0033387	301	357	24	413
830	0.0027964	243	365	24	487
831	0.0031461	231	327	22	423
832	0.003189	261	349	25	437
833	0.0030155	242	332	23	422
834	0.0031573	274	334	22	394
835	0.0031596	218	306	17	394
836	0.0033583	163	329	22	495
837	0.0032103	164	306	20	448
838	0.0028555	246	343	29	440
839	0.0034155	145	289	21	433
840	0.0034154	182	324	24	466
841	0.0033651	237	326	22	415
842	0.0031731	111	289	24	467
843	0.0030486	238	327	24	416
844	0.0031478	219	322	18	425
845	0.0034486	175	295	23	415
846	0.0035506	200	288	20	376
847	0.0034125	296	364	22	432
848	0.0031892	178	295	17	412
849	0.0034006	180	325	18	470
850	0.0032599	180	333	21	486
851	0.002963	241	344	23	447
852	0.0033347	183	314	25	445
853	0.0031035	194	303	25	412
854	0.0031808	233	324	22	415
855	0.0032029	216	334	24	452
856	0.0034859	229	328	19	427
857	0.0030603	180	330	27	480
858	0.0031846	204	323	20	442
859	0.0034146	201	319	22	437
860	0.0034065	260	357	23	454
861	0.0031701	304	372	26	440
862	0.0033839	228	354	20	480
863	0.0031936	254	331	21	408
864	0.0032355	162	319	25	476
865	0.0031689	194	343	27	492
866	0.0033821	246	327	21	408
867	0.0031713	253	361	22	469
868	0.0032703	257	346	19	435
869	0.0031876	262	322	19	382
870	0.0034409	119	302	22	485
871	0.002983	243	325	22	407
872	0.0032536	149	305	24	461
873	0.0031996	192	307	18	422
874	0.0035266	192	323	18	454
875	0.0032161	223	335	27	447
876	0.0031542	219	357	26	495
877	0.0028211	277	351	28	425
878	0.0037616	300	354	27	408
879	0.003444	224	346	22	468
880	0.0037549	78	278	24	478
881	0.0034656	224	326	20	428
882	0.0032665	214	331	20	448
883	0.0028895	233	337	28	441
884	0.0029415	255	344	26	433
885	0.0030361	239	328	20	417
886	0.0029915	248	341	24	434
887	0.0029831	247	320	19	393
888	0.0032036	222	318	19	414
889	0.0034255	156	293	23	430
890	0.0031561	191	323	21	455
891	0.0031657	220	313	20	406
892	0.0031119	226	328	25	430
893	0.0033757	197	312	25	427
894	0.003196	264	364	26	464
895	0.0039614	236	327	18	418
896	0.0031327	201	326	25	451
897	0.0031783	232	318	21	404
898	0.0036079	155	309	22	463
899	0.003187	210	315	25	420
900	0.0032502	144	307	24	470
901	0.0031226	180	306	24	432
902	0.0033631	138	310	24	482
903	0.0030883	197	324	21	451
904	0.0032842	202	318	18	434
905	0.0031103	186	312	22	438
906	0.0031088	213	328	22	443
907	0.0031695	152	297	20	442
908	0.0035536	165	309	21	453
909	0.0029689	224	326	19	428
910	0.0032678	243	341	26	439
911	0.0032578	275	348	20	421
912	0.0029577	244	330	25	416
913	0.0035267	220	339	24	458
914	0.0031546	206	332	23	458
915	0.0032839	205	314	20	423
916	0.0031529	142	289	22	436
917	0.0034324	277	366	23	455
918	0.0032464	231	317	19	403
919	0.0031011	201	290	19	379
920	0.0032602	199	323	23	447
921	0.0033209	153	315	21	477
922	0.0032473	221	335	21	449
923	0.0035488	82	285	20	488
924	0.0033271	246	353	23	460
925	0.0029032	245	328	23	411
926	0.0031359	217	330	19	443
927	0.0033376	149	313	23	477
928	0.003111	199	318	20	437
929	0.0029256	234	334	25	434
930	0.0031177	267	331	23	395
931	0.0033074	248	342	24	436
932	0.0032248	180	333	19	486
933	0.0031945	174	297	20	420
934	0.0033528	203	310	21	417
935	0.0035298	160	287	20	414
936	0.0031737	179	316	20	453
937	0.003272	183	326	28	469
938	0.0031158	210	306	20	402
939	0.0033152	255	308	20	361
940	0.0032171	249	351	23	453
941	0.0031899	109	315	19	521
942	0.0035089	170	304	20	438
943	0.0033139	229	326	26	423
944	0.003535	119	314	23	509
945	0.0033896	188	302	20	416
946	0.0030539	182	323	25	464
947	0.0034698	163	298	19	433
948	0.0031741	165	314	27	463
949	0.0032179	143	295	21	447
950	0.0031533	246	352	23	458
951	0.0033656	244	338	22	432
952	0.0032558	262	340	23	418
953	0.0031798	241	336	22	431
954	0.0037011	125	306	22	487
955	0.0031995	180	327	24	474
956	0.0031895	203	310	23	417
957	0.0032324	164	313	21	462
958	0.0033927	144	304	26	464
959	0.0028209	239	332	29	425
960	0.0031835	256	325	20	394
961	0.0030979	166	300	27	434
962	0.0033127	113	299	27	485
963	0.0030911	214	333	22	452
964	0.003264	184	324	22	464
965	0.0034142	215	340	23	465
966	0.0036855	132	307	20	482
967	0.0031512	223	310	20	397
968	0.0033114	230	346	21	462
969	0.0034385	164	299	22	434
970	0.0029868	220	292	19	364
971	0.0053248	233	319	24	405
972	0.0032289	229	327	22	425
973	0.0031615	216	348	26	480
974	0.0035133	145	297	21	449
975	0.0034002	137	305	26	473
976	0.0030913	210	312	23	414
977	0.0031797	237	324	18	411
978	0.0032493	266	366	24	466
979	0.0031373	199	319	18	439
980	0.0032903	203	312	21	421
981	0.0038171	226	334	22	442
982	0.0035437	194	328	22	462
983	0.0031071	232	336	25	440
984	0.0033395	197	331	21	465
985	0.003294	180	321	23	462
986	0.003571	208	316	23	424
987	0.0032875	308	374	28	440
988	0.0032508	250	337	25	424
989	0.0030515	274	352	28	430
990	0.0036106	168	321	24	474
991	0.003435	161	299	22	437
992	0.0031888	182	313	18	444
993	0.0031096	191	309	21	427
994	0.0031823	129	293	24	457
995	0.0031794	228	325	18	422
996	0.0032405	289	367	22	445
997	0.0033889	255	342	21	429
998	0.0031314	296	353	24	410
999	0.003198	273	334	22	395
mean	0.00322164	209.619	324.556	22.425	439.493

## Sheet: PolyMin_Bal
	time	SEq	Bal	Reg	Egal
0	0.0033308	218	317	26	416
1	0.0031265	248	321	23	394
2	0.0033282	245	344	21	443
3	0.0027483	205	315	18	425
4	0.0034898	234	330	24	426
5	0.0030238	306	345	24	384
6	0.0031566	182	308	23	434
7	0.0032279	252	344	24	436
8	0.0032395	214	311	25	408
9	0.0029578	223	333	25	443
10	0.0031802	210	333	20	456
11	0.0032628	133	301	25	469
12	0.0033933	177	294	22	411
13	0.0031731	111	315	26	519
14	0.0031221	254	323	20	392
15	0.0032168	204	327	21	450
16	0.0032312	222	338	24	454
17	0.0034905	165	302	25	439
18	0.0031657	149	293	19	437
19	0.0035272	198	313	21	428
20	0.0031863	245	319	23	393
21	0.003145	136	301	23	466
22	0.0032821	189	325	21	461
23	0.0031256	218	328	21	438
24	0.0032277	185	329	21	473
25	0.0032912	166	320	24	474
26	0.0033753	147	297	21	447
27	0.0033874	194	299	21	404
28	0.0031329	187	316	22	445
29	0.0034177	212	331	18	450
30	0.0030561	243	335	25	427
31	0.0033451	142	295	20	448
32	0.0032912	195	329	25	463
33	0.0031703	217	313	19	409
34	0.003033	186	308	29	430
35	0.0033566	162	298	20	434
36	0.0032758	196	297	23	398
37	0.0030939	220	324	20	428
38	0.003247	151	318	21	485
39	0.003111	210	327	20	444
40	0.0031506	93	267	20	441
41	0.0030485	217	329	18	441
42	0.0032502	184	324	23	464
43	0.0031678	96	281	22	466
44	0.003147	255	348	25	441
45	0.0030466	207	333	22	459
46	0.0032061	220	323	20	426
47	0.0031133	213	331	21	449
48	0.0033294	190	309	21	428
49	0.0034502	241	328	26	415
50	0.0030835	209	320	19	431
51	0.0033043	198	314	18	430
52	0.0032236	172	287	21	402
53	0.0032965	209	328	25	447
54	0.0032196	143	309	27	475
55	0.003154	273	352	27	431
56	0.0030849	164	303	21	442
57	0.0032996	236	313	24	390
58	0.0032566	174	315	20	456
59	0.0030898	232	329	21	426
60	0.0030162	135	311	23	487
61	0.0032614	174	306	20	438
62	0.0037749	172	291	22	410
63	0.0030147	189	309	29	429
64	0.0032027	265	335	20	405
65	0.0032291	243	338	22	433
66	0.0032164	235	332	24	429
67	0.0035177	142	329	23	516
68	0.0031529	169	298	29	427
69	0.0034436	247	328	18	409
70	0.0030282	217	328	24	439
71	0.0031736	297	351	29	405
72	0.0032637	249	340	23	431
73	0.003043	251	346	21	441
74	0.0032395	210	318	23	426
75	0.0027907	232	322	20	412
76	0.0030387	236	333	22	430
77	0.0033909	155	326	29	497
78	0.0033257	190	308	21	426
79	0.0031611	234	317	21	400
80	0.0033536	265	348	21	431
81	0.0031973	250	343	23	436
82	0.0032619	219	314	20	409
83	0.0048421	223	319	21	415
84	0.0030007	180	304	21	428
85	0.0031908	275	359	25	443
86	0.0034149	106	278	20	450
87	0.0031076	136	304	20	472
88	0.0032848	204	306	18	408
89	0.0033974	306	377	25	448
90	0.0030231	270	347	22	424
91	0.0033031	136	295	22	454
92	0.0032764	188	327	20	466
93	0.0051939	240	325	23	410
94	0.003236	285	344	27	403
95	0.0034224	142	307	24	472
96	0.0033077	249	348	21	447
97	0.0030748	216	319	23	422
98	0.0036577	154	309	24	464
99	0.0033096	194	322	23	450
100	0.003238	222	320	20	418
101	0.003394	153	328	21	503
102	0.0034453	211	316	18	421
103	0.0032545	124	292	26	460
104	0.0031692	226	348	29	470
105	0.003139	290	365	28	440
106	0.0030012	259	358	25	457
107	0.0030356	204	327	26	450
108	0.0033054	180	318	25	456
109	0.0033485	191	334	22	477
110	0.0032844	280	363	27	446
111	0.0032388	102	308	27	514
112	0.0032534	242	319	23	396
113	0.0031812	182	318	20	454
114	0.0032936	165	288	16	411
115	0.0031147	313	368	23	423
116	0.0031768	220	341	24	462
117	0.0032146	263	357	21	451
118	0.0031284	181	311	20	441
119	0.0033066	204	311	21	418
120	0.0031123	277	341	29	405
121	0.0032702	221	319	22	417
122	0.0033254	232	343	21	454
123	0.0034506	232	345	22	458
124	0.0030893	257	355	24	453
125	0.0036196	215	318	24	421
126	0.0032744	142	308	26	474
127	0.0029895	159	311	24	463
128	0.003227	221	338	22	455
129	0.0030724	209	314	19	419
130	0.0033018	248	316	22	384
131	0.00314	205	321	27	437
132	0.0030277	226	345	20	464
133	0.0031983	183	296	23	409
134	0.0031391	217	321	25	425
135	0.0030183	193	325	19	457
136	0.003147	255	322	22	389
137	0.0033193	174	298	18	422
138	0.0032058	196	323	24	450
139	0.0030737	255	329	23	403
140	0.0037828	267	353	21	439
141	0.0030512	258	328	18	398
142	0.0033252	244	336	23	428
143	0.0032055	221	343	23	465
144	0.0033242	295	360	20	425
145	0.0034138	203	321	22	439
146	0.0031146	219	315	20	411
147	0.0033118	221	329	20	437
148	0.0029306	241	341	25	441
149	0.0031918	200	328	24	456
150	0.003171	266	360	23	454
151	0.0030853	188	312	28	436
152	0.0032357	256	332	22	408
153	0.0032283	275	358	29	441
154	0.0034388	91	299	23	507
155	0.0031662	153	300	28	447
156	0.0032064	128	304	28	480
157	0.0029977	227	329	20	431
158	0.003273	214	317	20	420
159	0.0030968	186	314	20	442
160	0.0031319	157	303	26	449
161	0.0032167	189	332	23	475
162	0.0031438	215	326	20	437
163	0.0031237	237	319	23	401
164	0.0029923	275	365	25	455
165	0.0033153	170	299	21	428
166	0.0032015	146	296	23	446
167	0.0030094	222	325	23	428
168	0.0032156	206	328	24	450
169	0.0032159	245	341	23	437
170	0.0035307	278	352	26	426
171	0.0033828	218	338	20	458
172	0.0031212	161	309	21	457
173	0.0032745	303	359	25	415
174	0.0031066	172	293	16	414
175	0.003094	251	331	25	411
176	0.0029258	288	335	18	382
177	0.0028729	259	339	27	419
178	0.0031871	205	343	26	481
179	0.0031664	252	339	23	426
180	0.0031411	168	306	21	444
181	0.0031851	281	344	26	407
182	0.0031473	164	302	25	440
183	0.0032587	150	281	19	412
184	0.0032206	192	318	19	444
185	0.0033124	181	299	21	417
186	0.0032869	262	347	25	432
187	0.0035253	231	352	23	473
188	0.0031446	224	330	21	436
189	0.0030095	213	332	24	451
190	0.0032196	226	325	25	424
191	0.0029375	278	350	23	422
192	0.0030991	167	317	22	467
193	0.0032014	192	330	21	468
194	0.0034214	166	314	20	462
195	0.0034659	186	334	22	482
196	0.0032585	181	316	20	451
197	0.0037395	223	331	20	439
198	0.0033406	184	306	19	428
199	0.0034165	164	329	21	494
200	0.0031993	236	336	22	436
201	0.0032354	184	317	19	450
202	0.0030602	263	340	21	417
203	0.0053149	269	343	25	417
204	0.0031313	210	329	22	448
205	0.0033312	162	305	21	448
206	0.0027914	262	358	29	454
207	0.0036027	142	317	22	492
208	0.0031067	231	328	21	425
209	0.0031268	265	335	26	405
210	0.0032551	189	314	22	439
211	0.00353	195	315	23	435
212	0.0031127	158	318	24	478
213	0.0030736	199	332	26	465
214	0.0032879	272	360	20	448
215	0.0030413	288	358	26	428
216	0.003074	219	335	27	451
217	0.0031834	190	296	21	402
218	0.0031094	221	323	20	425
219	0.0032841	233	333	24	433
220	0.0033266	200	315	21	430
221	0.0033604	222	327	24	432
222	0.0034732	239	341	21	443
223	0.0030261	190	307	19	424
224	0.0035082	154	301	19	448
225	0.0031467	190	304	22	418
226	0.0030709	244	316	21	388
227	0.0030187	238	310	20	382
228	0.0028293	170	306	25	442
229	0.0033246	209	331	21	453
230	0.0031477	279	344	21	409
231	0.0029873	215	314	24	413
232	0.0031414	171	308	20	445
233	0.003486	302	363	22	424
234	0.0029183	190	301	20	412
235	0.0033234	174	304	22	434
236	0.0031988	208	318	21	428
237	0.0029353	299	366	25	433
238	0.0033392	290	347	23	404
239	0.0032727	225	344	24	463
240	0.0031687	188	314	21	440
241	0.0031296	228	321	22	414
242	0.0034844	185	299	20	413
243	0.0031062	208	316	21	424
244	0.0043453	229	324	20	419
245	0.0029486	183	307	22	431
246	0.0034146	108	269	28	430
247	0.0033569	232	347	23	462
248	0.0031402	221	329	23	437
249	0.0032415	174	315	21	456
250	0.0034828	162	308	28	454
251	0.0037051	141	301	19	461
252	0.0034708	182	304	21	426
253	0.0034242	195	339	23	483
254	0.0030771	175	299	21	423
255	0.0032651	146	302	21	458
256	0.0036969	191	324	20	457
257	0.0028943	186	309	25	432
258	0.0033113	177	320	25	463
259	0.0034233	137	294	22	451
260	0.0029852	258	339	26	420
261	0.0032249	265	349	26	433
262	0.0032068	225	338	23	451
263	0.0033631	222	323	21	424
264	0.0031352	198	312	19	426
265	0.0032664	222	333	19	444
266	0.0032488	238	340	27	442
267	0.0032078	270	358	22	446
268	0.0031504	140	307	19	474
269	0.0031037	206	313	20	420
270	0.0031182	164	310	21	456
271	0.0031413	142	308	24	474
272	0.0032714	198	322	25	446
273	0.0032914	223	354	24	485
274	0.0030459	288	347	23	406
275	0.003451	175	323	20	471
276	0.0030311	256	349	29	442
277	0.0029685	262	330	21	398
278	0.0034368	227	342	20	457
279	0.0029798	283	343	21	403
280	0.0034968	192	309	21	426
281	0.0030267	190	317	19	444
282	0.003349	228	344	22	460
283	0.0030457	239	329	24	419
284	0.0031463	205	302	27	399
285	0.0031423	186	320	21	454
286	0.0031798	226	316	20	406
287	0.0029992	162	323	25	484
288	0.0029989	292	360	22	428
289	0.0032098	205	322	21	439
290	0.0033745	245	343	23	441
291	0.0031906	263	332	22	401
292	0.003283	223	332	20	441
293	0.003183	257	346	23	435
294	0.0032291	193	313	19	433
295	0.0029838	240	330	22	420
296	0.0033163	299	362	26	425
297	0.003343	178	327	21	476
298	0.0028251	254	328	21	402
299	0.0031452	204	319	21	434
300	0.0034277	87	302	23	517
301	0.0030663	147	321	26	495
302	0.0030085	279	364	22	449
303	0.0032958	196	321	20	446
304	0.0030904	148	313	22	478
305	0.0032354	201	319	18	437
306	0.0033463	174	319	23	464
307	0.0030223	251	352	25	453
308	0.0033951	193	306	21	419
309	0.0031699	154	290	20	426
310	0.0033252	266	356	27	446
311	0.0032592	236	338	20	440
312	0.0032572	228	316	22	404
313	0.0033923	185	329	24	473
314	0.0041281	174	300	23	426
315	0.0031187	240	316	25	392
316	0.00313	171	293	23	415
317	0.0031632	197	293	16	389
318	0.0027869	309	350	26	391
319	0.0030759	189	319	19	449
320	0.003105	257	345	25	433
321	0.003164	189	311	24	433
322	0.0031692	218	326	20	434
323	0.0031843	160	305	19	450
324	0.0030363	209	327	27	445
325	0.0033052	131	303	21	475
326	0.0033291	175	314	19	453
327	0.0031888	171	313	20	455
328	0.0029574	192	310	26	428
329	0.0032875	123	288	20	453
330	0.0031004	255	347	23	439
331	0.0036794	259	359	23	459
332	0.0030768	238	333	25	428
333	0.0031308	190	322	19	454
334	0.003032	257	328	22	399
335	0.0033976	267	352	21	437
336	0.0029962	300	360	23	420
337	0.0033102	116	301	22	486
338	0.0032964	214	319	20	424
339	0.0034994	196	301	19	406
340	0.0031032	249	339	23	429
341	0.0035505	203	313	23	423
342	0.0033865	205	307	21	409
343	0.0032052	190	322	23	454
344	0.0031138	136	307	24	478
345	0.0032303	254	341	27	428
346	0.0033829	258	357	23	456
347	0.0032215	230	327	22	424
348	0.0033184	209	325	21	441
349	0.0032637	191	312	24	433
350	0.0032615	80	304	26	528
351	0.0030194	252	347	21	442
352	0.0033772	215	322	22	429
353	0.00312	195	305	22	415
354	0.0030131	249	316	19	383
355	0.003207	257	334	21	411
356	0.0033077	202	330	22	458
357	0.0031991	198	331	20	464
358	0.0032264	180	290	25	400
359	0.0033816	213	313	22	413
360	0.0027744	211	333	26	455
361	0.002991	251	334	19	417
362	0.0029987	254	337	21	420
363	0.0031757	245	331	23	417
364	0.003086	275	368	27	461
365	0.0032112	181	312	22	443
366	0.0034884	224	318	19	412
367	0.0032978	129	280	21	431
368	0.0031746	307	362	27	417
369	0.0033729	251	351	22	451
370	0.0029518	184	320	21	456
371	0.0032044	190	322	21	454
372	0.003304	203	334	20	465
373	0.0031552	122	305	23	488
374	0.0033759	186	333	19	480
375	0.0032417	209	316	22	423
376	0.0034687	181	330	22	479
377	0.0033092	127	301	22	475
378	0.0030807	260	331	28	402
379	0.003396	226	337	21	448
380	0.0030123	244	315	20	386
381	0.0032535	203	316	19	429
382	0.003144	164	303	28	442
383	0.0029911	229	333	24	437
384	0.0032968	194	321	20	448
385	0.0030377	194	292	24	390
386	0.0034464	250	354	22	458
387	0.0036752	112	287	23	462
388	0.0034041	182	335	21	488
389	0.002921	199	326	21	453
390	0.003097	163	298	26	433
391	0.0036057	216	319	18	422
392	0.0033161	224	309	22	394
393	0.003184	208	316	26	424
394	0.0032435	206	320	23	434
395	0.0027004	274	363	22	452
396	0.0032202	264	334	27	404
397	0.0032532	282	352	19	422
398	0.0031386	224	329	21	434
399	0.0034955	87	300	21	513
400	0.0032269	174	313	20	452
401	0.0034068	144	296	22	448
402	0.0033197	264	360	26	456
403	0.0031853	224	310	19	396
404	0.003018	182	305	23	428
405	0.0032658	269	369	24	469
406	0.0031543	208	314	19	420
407	0.0032451	286	343	25	400
408	0.0030121	140	300	21	460
409	0.0030985	138	305	21	472
410	0.0037464	193	321	20	449
411	0.0032173	247	343	26	439
412	0.0029846	193	324	26	455
413	0.0032836	170	301	22	432
414	0.0030997	150	302	24	454
415	0.003083	198	313	17	428
416	0.0030471	233	324	23	415
417	0.0029527	312	357	26	402
418	0.0032391	185	313	21	441
419	0.003115	259	341	23	423
420	0.0030854	215	312	22	409
421	0.0031599	195	312	23	429
422	0.003399	239	322	21	405
423	0.0031955	237	333	20	429
424	0.0031891	247	332	24	417
425	0.0030191	237	338	20	439
426	0.0030598	211	319	18	427
427	0.0031273	201	328	28	455
428	0.0027523	192	326	24	460
429	0.0033621	175	325	21	475
430	0.0031517	238	348	20	458
431	0.0031602	176	315	20	454
432	0.003131	102	280	24	458
433	0.0032417	215	331	23	447
434	0.0032209	193	321	23	449
435	0.003614	202	325	25	448
436	0.0034722	187	326	20	465
437	0.0033861	187	301	26	415
438	0.0033589	192	308	21	424
439	0.00349	150	303	20	456
440	0.0032361	181	299	21	417
441	0.0032696	109	280	25	451
442	0.0030927	330	387	26	444
443	0.0032776	189	322	20	455
444	0.0032855	181	328	20	475
445	0.0031305	227	344	25	461
446	0.0032287	212	317	18	422
447	0.002797	251	334	28	417
448	0.0033386	252	345	25	438
449	0.003161	290	365	26	440
450	0.0032906	181	327	24	473
451	0.0032249	190	320	18	450
452	0.0031744	208	331	27	454
453	0.0033015	172	319	20	466
454	0.0045806	317	373	25	429
455	0.0031433	189	339	24	489
456	0.003244	159	306	21	453
457	0.0034969	179	318	20	457
458	0.003123	257	338	23	419
459	0.0029837	197	300	21	403
460	0.0034333	94	296	26	498
461	0.0032151	122	299	22	476
462	0.0030906	210	305	22	400
463	0.0031571	145	305	27	465
464	0.0027515	242	344	24	446
465	0.0031158	200	286	18	372
466	0.0031942	168	296	18	424
467	0.0033127	240	316	22	392
468	0.0030679	197	321	27	445
469	0.0030514	276	357	25	438
470	0.003007	259	348	27	437
471	0.0032485	288	361	22	434
472	0.0029978	226	319	20	412
473	0.0033168	159	305	23	451
474	0.0027799	279	359	24	439
475	0.0031858	231	344	20	457
476	0.0032114	234	321	20	408
477	0.0033536	188	317	19	446
478	0.003057	201	319	25	437
479	0.0030195	194	314	18	434
480	0.0030653	251	338	20	425
481	0.0032219	163	308	21	453
482	0.0031907	160	301	23	442
483	0.0034355	187	316	22	445
484	0.0033277	177	307	22	437
485	0.0033669	141	304	21	467
486	0.0030969	209	328	21	447
487	0.0032546	147	318	24	489
488	0.0030894	225	333	20	441
489	0.0030628	178	332	24	486
490	0.003484	168	321	26	474
491	0.0031797	225	323	22	421
492	0.0033268	179	299	18	419
493	0.0031813	136	299	22	462
494	0.0031328	259	344	24	429
495	0.0032047	147	320	21	493
496	0.0034611	96	297	26	498
497	0.0030692	238	340	18	442
498	0.003378	210	341	27	472
499	0.0032941	211	345	22	479
500	0.0029171	233	339	26	445
501	0.003454	266	354	22	442
502	0.0034796	177	303	24	429
503	0.0030006	197	326	26	455
504	0.0031146	186	316	24	446
505	0.0034969	180	295	20	410
506	0.0033973	297	352	26	407
507	0.0032809	216	335	25	454
508	0.0035726	239	342	23	445
509	0.0031124	250	321	25	392
510	0.0030018	239	320	22	401
511	0.0030092	253	343	24	433
512	0.0030923	234	333	21	432
513	0.0032263	179	321	20	463
514	0.003192	194	318	22	442
515	0.0033401	270	346	20	422
516	0.0031745	242	328	23	414
517	0.0030574	227	343	21	459
518	0.0030737	239	317	23	395
519	0.0031649	293	370	23	447
520	0.0027895	282	350	20	418
521	0.0032895	195	319	24	443
522	0.003356	162	323	18	484
523	0.0032389	165	315	24	465
524	0.0032935	128	286	25	444
525	0.0035657	270	344	24	418
526	0.0032934	223	308	23	393
527	0.0032873	187	315	20	443
528	0.0031975	172	325	24	478
529	0.0034043	160	304	20	448
530	0.0031	152	329	21	506
531	0.0031284	203	327	19	451
532	0.0032083	235	319	21	403
533	0.0032271	177	312	20	447
534	0.0034572	238	336	23	434
535	0.0031364	201	308	21	415
536	0.0033885	229	332	23	435
537	0.0034636	181	329	24	477
538	0.0031994	203	346	24	489
539	0.0032711	191	326	20	461
540	0.003208	253	332	26	411
541	0.0033916	222	339	20	456
542	0.00314	251	335	23	419
543	0.0030709	242	325	23	408
544	0.0031759	203	323	19	443
545	0.0036909	192	318	20	444
546	0.0032066	312	378	25	444
547	0.0029147	192	291	21	390
548	0.0036875	203	319	26	435
549	0.0033266	180	314	21	448
550	0.0030276	249	356	24	463
551	0.0032367	231	337	25	443
552	0.0030663	208	313	23	418
553	0.0032478	246	333	21	420
554	0.0031516	185	321	27	457
555	0.0031112	172	301	21	430
556	0.0033186	229	334	25	439
557	0.0030626	204	310	20	416
558	0.0033237	123	321	23	519
559	0.0033984	285	367	27	449
560	0.0030746	266	355	22	444
561	0.003189	185	312	19	439
562	0.0031215	187	331	20	475
563	0.0033185	210	323	23	436
564	0.0035535	202	300	18	398
565	0.0032468	206	313	20	420
566	0.0031682	238	342	28	446
567	0.0034548	240	327	23	414
568	0.0033984	230	347	23	464
569	0.0031444	211	323	21	435
570	0.0029315	190	287	19	384
571	0.003341	235	332	21	429
572	0.0032035	222	329	24	436
573	0.0036074	221	359	24	497
574	0.003168	223	333	22	443
575	0.0029527	246	328	19	410
576	0.0038128	139	296	23	453
577	0.0029723	188	319	22	450
578	0.0032273	202	329	21	456
579	0.0032317	122	313	23	504
580	0.0028848	239	328	29	417
581	0.0032446	226	340	24	454
582	0.0031627	187	325	24	463
583	0.003121	245	352	23	459
584	0.0033776	199	330	21	461
585	0.0032281	305	367	26	429
586	0.0031294	263	344	25	425
587	0.003447	211	328	19	445
588	0.0037089	164	307	21	450
589	0.0033804	203	333	19	463
590	0.0034119	243	333	21	423
591	0.0032139	265	335	23	405
592	0.0030811	184	308	22	432
593	0.0034117	171	323	26	475
594	0.0031632	141	293	24	445
595	0.0029988	240	320	27	400
596	0.0032857	200	302	21	404
597	0.0031199	193	330	25	467
598	0.0032551	189	316	26	443
599	0.0030284	286	351	22	416
600	0.0028955	265	354	25	443
601	0.0030259	207	314	20	421
602	0.0031123	330	384	28	438
603	0.0032205	258	336	20	414
604	0.0031436	194	316	22	438
605	0.0032931	222	341	21	460
606	0.0030975	264	338	26	412
607	0.0035055	209	329	22	449
608	0.0031553	182	314	23	446
609	0.0033088	205	324	21	443
610	0.0033391	131	283	24	435
611	0.003169	167	309	20	451
612	0.0033059	102	285	26	468
613	0.0031914	222	331	24	440
614	0.0031872	96	293	23	490
615	0.0031638	181	318	21	455
616	0.0032252	224	325	20	426
617	0.0036896	247	356	27	465
618	0.0033427	209	311	21	413
619	0.0028237	239	336	25	433
620	0.0033859	181	300	24	419
621	0.0032764	162	306	19	450
622	0.0032353	135	310	26	485
623	0.0032944	311	360	26	409
624	0.0032235	220	326	21	432
625	0.0030433	202	321	26	440
626	0.0032479	267	330	19	393
627	0.003052	242	348	22	454
628	0.0032792	155	307	22	459
629	0.0032792	194	314	20	434
630	0.0032474	230	346	25	462
631	0.0033977	151	310	23	469
632	0.0031292	173	295	20	417
633	0.0032695	173	307	21	441
634	0.003159	208	331	23	454
635	0.0032549	220	342	21	464
636	0.0032305	167	310	21	453
637	0.0036183	197	332	23	467
638	0.0029747	225	326	23	427
639	0.0026844	266	349	25	432
640	0.0032259	113	292	26	471
641	0.003244	206	313	19	420
642	0.0031542	277	358	26	439
643	0.0031762	231	345	26	459
644	0.0033402	259	331	23	403
645	0.0030011	231	328	23	425
646	0.0036209	148	291	19	434
647	0.0034757	177	330	21	483
648	0.0031001	188	312	21	436
649	0.0030956	177	324	29	471
650	0.003133	276	338	19	400
651	0.0034286	229	354	26	479
652	0.0033855	185	304	19	423
653	0.0032348	283	361	24	439
654	0.0034761	213	350	26	487
655	0.0033002	258	342	21	426
656	0.0034542	159	292	19	425
657	0.0030521	161	301	20	441
658	0.0031883	272	338	26	404
659	0.0027876	199	331	21	463
660	0.0030438	306	373	21	440
661	0.0027757	259	339	23	419
662	0.0029475	193	320	21	447
663	0.0035053	244	338	21	432
664	0.0032194	207	327	21	447
665	0.0037386	262	336	24	410
666	0.0029536	270	345	27	420
667	0.0028175	195	297	21	399
668	0.0035309	216	327	22	438
669	0.0030305	177	306	27	435
670	0.0032416	241	319	21	397
671	0.0032293	157	310	23	463
672	0.0031318	157	309	24	461
673	0.0034066	242	345	23	448
674	0.0032111	188	301	28	414
675	0.0033015	241	331	20	421
676	0.0031742	197	329	19	461
677	0.0030323	189	314	25	439
678	0.0033463	232	331	21	430
679	0.0034244	247	345	26	443
680	0.0031572	205	341	25	477
681	0.0031482	196	310	19	424
682	0.0033405	186	329	23	472
683	0.0032469	290	362	24	434
684	0.003196	181	331	23	481
685	0.0032707	262	344	22	426
686	0.0029989	145	294	22	443
687	0.0032173	298	364	27	430
688	0.0041231	141	299	25	457
689	0.0034405	239	317	19	395
690	0.0032973	155	318	28	481
691	0.0030268	239	327	24	415
692	0.0027896	273	349	26	425
693	0.0033341	215	324	23	433
694	0.0031865	186	316	23	446
695	0.0031218	204	326	18	448
696	0.0031515	262	341	26	420
697	0.0030756	179	310	20	441
698	0.003218	216	335	23	454
699	0.0030885	231	356	22	481
700	0.0033482	224	317	20	410
701	0.0030034	183	304	19	425
702	0.0030722	270	342	27	414
703	0.0029014	271	330	22	389
704	0.0033617	187	319	20	451
705	0.0030861	188	315	25	442
706	0.0035181	143	319	24	495
707	0.0035093	225	333	21	441
708	0.003385	254	346	23	438
709	0.0031112	259	345	23	431
710	0.0031856	246	364	21	482
711	0.0032682	272	367	21	462
712	0.0032112	179	317	20	455
713	0.0026713	234	332	27	430
714	0.0030459	238	323	24	408
715	0.0033563	202	317	22	432
716	0.0031607	213	335	20	457
717	0.0027856	191	309	19	427
718	0.0028999	196	330	28	464
719	0.0032409	111	312	26	513
720	0.0033	199	312	18	425
721	0.0030747	199	309	21	419
722	0.0033733	167	308	22	449
723	0.0035498	298	360	21	422
724	0.0032908	211	324	25	437
725	0.0027476	155	317	29	479
726	0.0032518	244	328	20	412
727	0.002857	282	357	23	432
728	0.0033909	185	320	23	455
729	0.0030934	152	302	22	452
730	0.003168	261	339	25	417
731	0.0033133	217	321	21	425
732	0.0034944	215	323	21	431
733	0.0030518	192	306	24	420
734	0.0032673	162	295	19	428
735	0.0034175	178	306	23	434
736	0.0030779	239	339	22	439
737	0.0030979	230	340	24	450
738	0.0030974	206	318	21	430
739	0.0031088	197	328	22	459
740	0.0031901	157	299	22	441
741	0.0031102	261	332	20	403
742	0.0032544	298	365	24	432
743	0.0036226	142	312	23	482
744	0.0030405	193	316	17	439
745	0.0030077	180	303	21	426
746	0.0029324	221	314	21	407
747	0.0028405	220	313	17	406
748	0.0030975	233	343	21	453
749	0.003365	113	303	23	493
750	0.0034724	316	370	21	424
751	0.0033968	241	327	21	413
752	0.0030882	196	328	26	460
753	0.0031689	289	361	25	433
754	0.0034027	269	339	22	409
755	0.0033896	181	326	25	471
756	0.0030675	211	324	24	437
757	0.0033547	184	321	19	458
758	0.0028471	190	310	28	430
759	0.0030935	192	310	20	428
760	0.0029915	208	313	20	418
761	0.0031695	241	336	23	431
762	0.003196	221	320	22	419
763	0.0032733	199	318	20	437
764	0.0031892	188	291	24	394
765	0.0029734	213	291	19	369
766	0.0034398	216	336	23	456
767	0.0035702	220	344	21	468
768	0.003032	192	321	23	450
769	0.0034876	250	338	22	426
770	0.0031517	248	350	26	452
771	0.0030406	213	302	22	391
772	0.0043859	173	305	22	437
773	0.0033424	182	293	22	404
774	0.0033784	166	304	18	442
775	0.0031479	226	320	22	414
776	0.0032485	199	307	19	415
777	0.0031245	161	311	22	461
778	0.0032436	191	323	25	455
779	0.0033006	168	299	23	430
780	0.0032166	254	357	23	460
781	0.0035924	249	347	25	445
782	0.0031907	210	336	29	462
783	0.0033273	220	336	24	452
784	0.0032783	261	337	21	413
785	0.0028135	159	319	27	479
786	0.003218	217	326	25	435
787	0.0034467	204	314	19	424
788	0.0034337	199	307	18	415
789	0.0030542	204	311	20	418
790	0.004678	231	348	28	465
791	0.0032685	169	298	19	427
792	0.003128	240	346	24	452
793	0.0031942	201	325	22	449
794	0.0030788	247	360	23	473
795	0.0031279	185	321	20	457
796	0.0028088	177	324	23	471
797	0.0034726	169	306	20	443
798	0.0031707	258	345	20	432
799	0.0033667	208	311	18	414
800	0.0028856	201	319	25	437
801	0.0030815	259	350	21	441
802	0.0032599	159	303	22	447
803	0.0031634	228	342	21	456
804	0.0030988	271	352	25	433
805	0.0031369	255	328	19	401
806	0.0033817	272	371	25	470
807	0.0031243	171	317	21	463
808	0.0032957	177	308	18	439
809	0.0031891	292	375	22	458
810	0.0031413	167	321	26	475
811	0.0029451	279	354	23	429
812	0.0031732	176	311	22	446
813	0.0032009	211	316	24	421
814	0.0034074	248	335	22	422
815	0.0029803	252	339	23	426
816	0.0033835	143	301	24	459
817	0.0033476	182	301	19	420
818	0.0030632	193	326	21	459
819	0.0031244	295	358	23	421
820	0.0031688	160	310	23	460
821	0.0031624	187	314	20	441
822	0.0035079	270	341	21	412
823	0.0032133	217	337	20	457
824	0.0033156	229	319	20	409
825	0.003346	213	306	19	399
826	0.0033538	126	303	20	480
827	0.0036584	227	347	22	467
828	0.0032221	148	318	20	488
829	0.0032036	301	357	24	413
830	0.0028961	243	365	24	487
831	0.0032768	231	327	22	423
832	0.0032659	261	349	25	437
833	0.0030859	242	332	23	422
834	0.0032858	274	334	22	394
835	0.0031202	218	306	17	394
836	0.0033283	163	329	22	495
837	0.0031998	164	306	20	448
838	0.0029621	246	343	29	440
839	0.0033158	145	289	21	433
840	0.0031543	182	324	24	466
841	0.0032347	237	326	22	415
842	0.0032286	111	289	24	467
843	0.0031255	238	327	24	416
844	0.0030739	219	322	18	425
845	0.0037705	175	295	23	415
846	0.0032461	200	288	20	376
847	0.0032501	296	364	22	432
848	0.003101	178	295	17	412
849	0.0033209	180	325	18	470
850	0.003171	180	333	21	486
851	0.0029119	241	344	23	447
852	0.0031131	183	314	25	445
853	0.0031172	194	303	25	412
854	0.0032263	233	324	22	415
855	0.0031038	216	334	24	452
856	0.0033028	229	328	19	427
857	0.0030229	180	330	27	480
858	0.0031043	204	323	20	442
859	0.003784	201	319	22	437
860	0.0033569	260	357	23	454
861	0.0032686	304	372	26	440
862	0.0035228	228	354	20	480
863	0.0031894	254	331	21	408
864	0.0031535	162	319	25	476
865	0.0031103	194	343	27	492
866	0.0033458	246	327	21	408
867	0.0033077	253	361	22	469
868	0.0032293	257	346	19	435
869	0.0031311	262	322	19	382
870	0.0034756	119	302	22	485
871	0.0032156	243	325	22	407
872	0.0032937	149	305	24	461
873	0.0033009	192	307	18	422
874	0.0032813	192	323	18	454
875	0.00305	223	335	27	447
876	0.0032874	219	357	26	495
877	0.0028347	277	351	28	425
878	0.0035202	300	354	27	408
879	0.0036407	224	346	22	468
880	0.0035245	78	278	24	478
881	0.0033517	224	326	20	428
882	0.0033314	214	331	20	448
883	0.0029915	233	337	28	441
884	0.0032326	255	344	26	433
885	0.0031474	239	328	20	417
886	0.0029739	248	341	24	434
887	0.003047	247	320	19	393
888	0.0032451	222	318	19	414
889	0.0032211	156	293	23	430
890	0.0032319	191	323	21	455
891	0.0031331	220	313	20	406
892	0.0031571	226	328	25	430
893	0.0030276	197	312	25	427
894	0.0030979	264	364	26	464
895	0.0031055	236	327	18	418
896	0.0031492	201	326	25	451
897	0.0031288	232	318	21	404
898	0.0035257	155	309	22	463
899	0.0032127	210	315	25	420
900	0.0031269	144	307	24	470
901	0.0035743	180	306	24	432
902	0.0036495	138	310	24	482
903	0.0031092	197	324	21	451
904	0.0032764	202	318	18	434
905	0.0034091	186	312	22	438
906	0.0031187	213	328	22	443
907	0.0032457	152	297	20	442
908	0.0037633	165	309	21	453
909	0.0031746	224	326	19	428
910	0.0035147	243	341	26	439
911	0.0032129	275	348	20	421
912	0.002917	244	330	25	416
913	0.0035857	220	339	24	458
914	0.0029965	206	332	23	458
915	0.0033175	205	314	20	423
916	0.0031382	142	289	22	436
917	0.003288	277	366	23	455
918	0.0032908	231	317	19	403
919	0.0033676	201	290	19	379
920	0.0033584	199	323	23	447
921	0.0033333	153	315	21	477
922	0.0030751	221	335	21	449
923	0.0033742	82	285	20	488
924	0.0034677	246	353	23	460
925	0.0028623	245	328	23	411
926	0.0031954	217	330	19	443
927	0.003453	149	313	23	477
928	0.0035005	199	318	20	437
929	0.0027653	234	334	25	434
930	0.0029499	267	331	23	395
931	0.0031104	248	342	24	436
932	0.0032368	180	333	19	486
933	0.0031378	174	297	20	420
934	0.0032252	203	310	21	417
935	0.0031479	160	287	20	414
936	0.0031437	179	316	20	453
937	0.0032577	183	326	28	469
938	0.0031389	210	306	20	402
939	0.0032557	255	308	20	361
940	0.0031534	249	351	23	453
941	0.0033195	109	315	19	521
942	0.0033156	170	304	20	438
943	0.0034093	229	326	26	423
944	0.0035968	119	314	23	509
945	0.003208	188	302	20	416
946	0.0029429	182	323	25	464
947	0.0031216	163	298	19	433
948	0.0030582	165	314	27	463
949	0.0032551	143	295	21	447
950	0.0033587	246	352	23	458
951	0.0036037	244	338	22	432
952	0.0033263	262	340	23	418
953	0.0033943	241	336	22	431
954	0.0034132	125	306	22	487
955	0.0032049	180	327	24	474
956	0.0031166	203	310	23	417
957	0.0032011	164	313	21	462
958	0.0033918	144	304	26	464
959	0.0027148	239	332	29	425
960	0.0032649	256	325	20	394
961	0.0032963	166	300	27	434
962	0.003398	113	299	27	485
963	0.0033219	214	333	22	452
964	0.0032214	184	324	22	464
965	0.0032964	215	340	23	465
966	0.0034087	132	307	20	482
967	0.0030784	223	310	20	397
968	0.003651	230	346	21	462
969	0.0033488	164	299	22	434
970	0.0027922	220	292	19	364
971	0.0032275	233	319	24	405
972	0.0034658	229	327	22	425
973	0.0033568	216	348	26	480
974	0.0033641	145	297	21	449
975	0.0035396	137	305	26	473
976	0.0031159	210	312	23	414
977	0.0031697	237	324	18	411
978	0.0033627	266	366	24	466
979	0.0030609	199	319	18	439
980	0.0031895	203	312	21	421
981	0.0035986	226	334	22	442
982	0.0038921	194	328	22	462
983	0.0032228	232	336	25	440
984	0.0031734	197	331	21	465
985	0.0041573	180	321	23	462
986	0.0030821	208	316	23	424
987	0.0033574	308	374	28	440
988	0.0032316	250	337	25	424
989	0.0037983	274	352	28	430
990	0.0036031	168	321	24	474
991	0.0033825	161	299	22	437
992	0.0031881	182	313	18	444
993	0.0030792	191	309	21	427
994	0.0032537	129	293	24	457
995	0.0030462	228	325	18	422
996	0.0032744	289	367	22	445
997	0.0030852	255	342	21	429
998	0.0032893	296	353	24	410
999	0.0032317	273	334	22	395
mean	0.00323318	209.63	324.541	22.432	439.452

## Sheet: DACC_D
	time	SEq	Bal	Reg	Egal
0	0.0011544	218	317	26	416
1	0.001005	217	312	24	407
2	0.0008895	290	359	23	428
3	0.0011439	205	315	18	425
4	0.0010918	268	351	27	434
5	0.0009141	209	311	24	413
6	0.0010359	182	308	23	434
7	0.0009939	289	359	26	429
8	0.0014134	165	296	26	427
9	0.0009896	285	356	25	427
10	0.0009099	293	369	25	445
11	0.0010632	235	342	25	449
12	0.0009036	248	324	22	400
13	0.0010288	262	353	26	444
14	0.0008131	293	352	29	411
15	0.0009821	224	337	23	450
16	0.0009541	248	344	25	440
17	0.0012718	165	302	25	439
18	0.0009521	246	334	23	422
19	0.0010348	198	313	21	428
20	0.0010527	270	337	27	404
21	0.0008204	284	333	23	382
22	0.0010197	251	346	24	441
23	0.0009729	289	368	27	447
24	0.0010642	281	360	28	439
25	0.0008355	253	348	27	443
26	0.0008763	259	337	24	415
27	0.0011629	290	342	23	394
28	0.0010944	228	336	28	444
29	0.0012101	182	324	27	466
30	0.0010665	199	311	25	423
31	0.0010979	235	340	25	445
32	0.001214	243	344	27	445
33	0.0009807	217	313	19	409
34	0.0011308	200	314	29	428
35	0.0011057	232	323	29	414
36	0.0011206	247	316	26	385
37	0.0011541	129	290	23	451
38	0.0012731	151	318	21	485
39	0.0009949	332	389	28	446
40	0.0008512	247	321	24	395
41	0.00093	257	346	20	435
42	0.0013193	219	339	26	459
43	0.0011888	240	321	22	402
44	0.0012922	240	342	25	444
45	0.0009145	306	370	25	434
46	0.0011905	176	315	27	454
47	0.0009439	267	357	26	447
48	0.0007965	270	346	26	422
49	0.0008726	282	353	24	424
50	0.0010482	209	320	19	431
51	0.0008826	282	362	29	442
52	0.0008582	247	335	26	423
53	0.001139	209	328	25	447
54	0.0011303	216	338	29	460
55	0.0010148	297	358	29	419
56	0.001212	228	321	23	414
57	0.0010558	236	313	24	390
58	0.0011619	206	326	21	446
59	0.0009634	263	350	29	437
60	0.00109	177	323	23	469
61	0.0008408	284	341	25	398
62	0.0009171	172	291	22	410
63	0.0011756	189	309	29	429
64	0.0009357	224	321	28	418
65	0.0008941	303	368	27	433
66	0.000901	235	332	24	429
67	0.0009451	260	366	25	472
68	0.0012057	236	314	29	392
69	0.0010834	247	328	18	409
70	0.0010464	252	346	26	440
71	0.0008692	297	351	29	405
72	0.0010851	272	352	24	432
73	0.001056	320	382	27	444
74	0.0010861	248	331	26	414
75	0.0009473	232	322	20	412
76	0.0011044	298	352	22	406
77	0.0010972	369	421	29	473
78	0.0008839	209	313	23	417
79	0.001084	270	337	26	404
80	0.0008597	265	348	21	431
81	0.0009907	250	343	23	436
82	0.0008121	259	329	23	399
83	0.0009784	223	319	21	415
84	0.0009483	218	316	23	414
85	0.0009726	251	357	25	463
86	0.0012549	258	341	26	424
87	0.0011797	263	350	24	437
88	0.0011508	245	328	25	411
89	0.0012481	206	335	25	464
90	0.0009173	313	367	22	421
91	0.0010133	192	320	23	448
92	0.0010965	241	344	22	447
93	0.0011743	210	320	23	430
94	0.0010071	302	349	28	396
95	0.0010716	197	320	24	443
96	0.0009877	249	348	21	447
97	0.0012402	216	319	23	422
98	0.0009046	302	370	27	438
99	0.0011669	194	322	23	450
100	0.001048	222	320	20	418
101	0.0011883	153	328	21	503
102	0.0009895	232	322	19	412
103	0.0014098	124	292	26	460
104	0.0011645	206	343	29	480
105	0.0009146	242	344	28	446
106	0.0012992	259	358	25	457
107	0.0011351	229	340	23	451
108	0.0010071	242	335	25	428
109	0.0010425	274	353	23	432
110	0.0010469	280	363	27	446
111	0.0011755	260	356	27	452
112	0.0011399	218	315	23	412
113	0.000977	221	331	22	441
114	0.0008559	243	320	20	397
115	0.0011782	284	356	23	428
116	0.0011849	220	341	24	462
117	0.0012181	218	341	28	464
118	0.0011222	181	311	20	441
119	0.0011982	186	297	21	408
120	0.0011083	260	336	29	412
121	0.0012197	184	309	29	434
122	0.0008298	282	355	26	428
123	0.0013467	201	336	23	471
124	0.001228	217	338	26	459
125	0.0010423	215	318	24	421
126	0.0010461	253	348	28	443
127	0.0010355	201	322	24	443
128	0.0014517	100	304	27	508
129	0.0009182	269	350	29	431
130	0.0010516	206	300	24	394
131	0.0010277	205	321	27	437
132	0.0011748	226	345	20	464
133	0.0011006	183	296	23	409
134	0.000848	301	368	27	435
135	0.0011055	233	341	25	449
136	0.0009626	255	322	22	389
137	0.0009571	261	335	27	409
138	0.0010045	259	351	27	443
139	0.0010267	255	329	23	403
140	0.0009073	313	366	24	419
141	0.000963	258	328	18	398
142	0.0009331	293	362	26	431
143	0.0009943	237	350	25	463
144	0.0012354	233	344	23	455
145	0.0010042	202	325	25	448
146	0.0008759	219	315	20	411
147	0.000999	255	340	20	425
148	0.0010434	213	336	25	459
149	0.0010221	216	337	24	458
150	0.0010778	266	360	23	454
151	0.0010234	273	335	28	397
152	0.0012898	256	332	22	408
153	0.0007914	302	376	29	450
154	0.0012613	91	299	23	507
155	0.0011299	175	309	28	443
156	0.0010159	251	340	28	429
157	0.0010831	264	347	26	430
158	0.0009117	260	329	20	398
159	0.0009338	268	345	29	422
160	0.001241	221	324	28	427
161	0.0009179	257	351	24	445
162	0.0009314	239	333	23	427
163	0.0010643	237	319	23	401
164	0.0009739	275	365	25	455
165	0.0008434	269	343	24	417
166	0.0009533	250	331	25	412
167	0.0009425	236	334	25	432
168	0.0008903	255	341	26	427
169	0.0012687	190	316	23	442
170	0.0008386	278	352	26	426
171	0.0011009	262	355	26	448
172	0.0012712	161	309	21	457
173	0.0011481	201	319	26	437
174	0.0013343	144	291	22	438
175	0.0011366	251	331	25	411
176	0.0009982	265	329	19	393
177	0.000996	259	339	27	419
178	0.0011925	161	330	29	499
179	0.0010206	252	339	23	426
180	0.0011102	168	306	21	444
181	0.0010915	281	344	26	407
182	0.0009729	194	308	25	422
183	0.000817	241	319	25	397
184	0.0010273	209	331	22	453
185	0.0010615	299	357	28	415
186	0.0009935	262	347	25	432
187	0.0012136	195	339	28	483
188	0.0008544	302	369	25	436
189	0.0009128	267	347	24	427
190	0.001079	187	314	25	441
191	0.0011644	278	350	23	422
192	0.0012969	167	317	22	467
193	0.0010734	258	351	23	444
194	0.0011646	249	349	26	449
195	0.0008139	307	375	27	443
196	0.000922	181	316	20	451
197	0.0013129	191	321	20	451
198	0.0009485	200	311	19	422
199	0.000906	229	337	25	445
200	0.0010105	305	369	26	433
201	0.0009817	255	346	27	437
202	0.0010668	208	322	26	436
203	0.0008019	259	340	25	421
204	0.0008971	246	342	22	438
205	0.0010984	162	305	21	448
206	0.0010608	262	358	29	454
207	0.0011004	228	339	22	450
208	0.0010018	249	335	22	421
209	0.0011666	228	323	26	418
210	0.0012454	308	371	28	434
211	0.0015967	245	337	26	429
212	0.0011484	263	356	29	449
213	0.0009441	274	351	27	428
214	0.0010459	272	360	20	448
215	0.0009843	288	358	26	428
216	0.0010013	219	335	27	451
217	0.0010126	207	304	25	401
218	0.0012333	221	323	20	425
219	0.0011155	169	321	25	473
220	0.0009633	297	361	26	425
221	0.0010711	248	334	24	420
222	0.0009399	239	341	21	443
223	0.0007425	254	334	20	414
224	0.0011161	233	329	21	425
225	0.0010531	222	316	22	410
226	0.0009677	287	322	22	357
227	0.000948	238	310	20	382
228	0.0012558	170	306	25	442
229	0.0010282	312	373	25	434
230	0.0010213	218	331	21	444
231	0.0009735	293	349	29	405
232	0.0010385	171	308	20	445
233	0.0010194	302	363	22	424
234	0.0008758	207	305	20	403
235	0.000968	253	326	23	399
236	0.0010717	168	306	24	444
237	0.0010715	299	366	25	433
238	0.0011149	180	314	29	448
239	0.0012268	173	329	28	485
240	0.0011958	229	325	22	421
241	0.0009423	228	321	22	414
242	0.0010715	215	322	25	429
243	0.0010358	245	328	22	411
244	0.0008432	336	379	29	422
245	0.0011206	215	329	25	443
246	0.0008404	265	330	29	395
247	0.000986	270	364	23	458
248	0.0010676	266	340	27	414
249	0.001219	242	348	26	454
250	0.0012558	162	308	28	454
251	0.0009607	232	338	27	444
252	0.0009884	182	304	21	426
253	0.0009379	371	412	26	453
254	0.0008395	262	337	24	412
255	0.0009297	224	330	28	436
256	0.0009315	306	365	23	424
257	0.0010235	186	309	25	432
258	0.0012451	177	320	25	463
259	0.0009575	251	343	23	435
260	0.0010449	284	361	27	438
261	0.0009484	265	349	26	433
262	0.0012245	264	349	23	434
263	0.001003	270	347	28	424
264	0.0008992	267	354	28	441
265	0.0010737	285	367	26	449
266	0.0009576	266	355	24	444
267	0.0011337	270	358	22	446
268	0.0011441	241	346	23	451
269	0.0009746	206	313	20	420
270	0.0009282	264	347	25	430
271	0.0012829	172	320	24	468
272	0.000982	297	364	29	431
273	0.0009607	287	390	24	493
274	0.0010112	257	342	23	427
275	0.0013019	229	342	21	455
276	0.0009484	305	384	29	463
277	0.0010803	262	330	21	398
278	0.0009171	300	371	26	442
279	0.000928	262	332	23	402
280	0.0010512	105	282	23	459
281	0.0010792	190	317	19	444
282	0.0008634	323	389	23	455
283	0.0010766	253	339	24	425
284	0.0009558	244	319	28	394
285	0.0009512	238	339	23	440
286	0.0009471	243	326	20	409
287	0.0009923	232	350	27	468
288	0.0012795	231	339	23	447
289	0.0009528	280	343	24	406
290	0.0009528	245	343	23	441
291	0.001037	258	330	22	402
292	0.0011756	223	332	20	441
293	0.0012391	167	315	26	463
294	0.001148	193	313	19	433
295	0.0010025	240	330	22	420
296	0.0010072	299	362	26	425
297	0.0012047	274	361	24	448
298	0.000783	254	328	21	402
299	0.0008909	245	334	27	423
300	0.0014098	239	348	25	457
301	0.0010747	183	327	27	471
302	0.0011324	279	364	22	449
303	0.0011498	271	342	21	413
304	0.001108	170	325	22	480
305	0.000961	259	342	25	425
306	0.000973	276	358	27	440
307	0.0011145	251	352	25	453
308	0.0011013	238	323	24	408
309	0.0011292	240	312	21	384
310	0.0013202	171	318	29	465
311	0.001097	236	338	20	440
312	0.0010393	300	349	27	398
313	0.0012705	185	329	24	473
314	0.0009323	261	346	23	431
315	0.0008733	240	316	25	392
316	0.0010112	171	293	23	415
317	0.0011799	197	293	16	389
318	0.001038	309	350	26	391
319	0.0009047	252	339	28	426
320	0.0012531	234	334	25	434
321	0.0010159	210	318	26	426
322	0.0009623	254	337	23	420
323	0.0009186	240	336	27	432
324	0.0012068	209	327	27	445
325	0.0010495	240	348	24	456
326	0.0011083	175	314	19	453
327	0.0010349	292	348	23	404
328	0.00128	138	288	28	438
329	0.00097	216	323	28	430
330	0.0014395	183	323	26	463
331	0.0009459	259	359	23	459
332	0.0010252	280	356	28	432
333	0.0009142	262	349	23	436
334	0.0009763	257	328	22	399
335	0.0012272	187	326	26	465
336	0.0011317	263	348	23	433
337	0.0010555	273	360	25	447
338	0.0009686	214	319	20	424
339	0.0007387	309	360	24	411
340	0.0009605	275	354	28	433
341	0.0010112	184	308	23	432
342	0.0010181	238	328	23	418
343	0.0008185	287	351	26	415
344	0.0009198	261	355	27	449
345	0.0010335	205	321	27	437
346	0.0011371	258	357	23	456
347	0.0008595	282	352	25	422
348	0.0010854	252	341	23	430
349	0.0010308	269	353	27	437
350	0.0010093	281	364	29	447
351	0.0013353	252	347	21	442
352	0.0011794	254	348	23	442
353	0.0010793	195	305	22	415
354	0.0011222	183	299	22	415
355	0.0010141	240	323	21	406
356	0.00086	321	388	29	455
357	0.0008729	264	349	24	434
358	0.001026	180	290	25	400
359	0.0009327	213	313	22	413
360	0.0013066	211	333	26	455
361	0.0007868	279	353	26	427
362	0.0010108	254	337	21	420
363	0.0011612	245	331	23	417
364	0.001636	275	368	27	461
365	0.0011309	208	330	27	452
366	0.001002	224	318	19	412
367	0.0012696	129	280	21	431
368	0.0011264	205	315	27	425
369	0.0010706	219	343	24	467
370	0.0010572	240	342	23	444
371	0.0009512	284	356	28	428
372	0.000931	331	395	29	459
373	0.0010333	243	341	29	439
374	0.0011302	339	399	28	459
375	0.0011772	209	316	22	423
376	0.00116	181	330	22	479
377	0.0009534	218	321	23	424
378	0.0010295	278	338	29	398
379	0.0013509	313	370	29	427
380	0.000929	244	315	20	386
381	0.0008622	254	335	21	416
382	0.0010995	196	318	28	440
383	0.0010557	229	333	24	437
384	0.0011638	277	352	22	427
385	0.0009542	213	307	27	401
386	0.0010179	250	354	22	458
387	0.001178	177	311	25	445
388	0.0010382	361	412	27	463
389	0.0011564	199	326	21	453
390	0.001064	163	298	26	433
391	0.0009612	216	319	18	422
392	0.0009975	262	329	24	396
393	0.0010256	287	360	29	433
394	0.0009027	206	320	23	434
395	0.0011529	274	363	22	452
396	0.0008523	258	338	25	418
397	0.001042	290	359	22	428
398	0.0009619	224	329	21	434
399	0.0010188	263	357	28	451
400	0.0009975	247	339	28	431
401	0.0011774	222	314	23	406
402	0.001141	219	343	26	467
403	0.0011431	224	310	19	396
404	0.0009133	220	321	26	422
405	0.0013552	269	369	24	469
406	0.0011471	251	334	22	417
407	0.0007655	286	343	25	400
408	0.001088	197	324	22	451
409	0.0008143	256	331	22	406
410	0.0008979	308	364	23	420
411	0.0009832	230	337	26	444
412	0.0011486	210	333	26	456
413	0.0011637	188	305	23	422
414	0.0011153	185	312	24	439
415	0.0009942	226	324	22	422
416	0.0011526	233	324	23	415
417	0.001162	332	373	26	414
418	0.0012883	266	345	22	424
419	0.0012109	207	327	27	447
420	0.0011766	215	312	22	409
421	0.0010258	285	345	27	405
422	0.0010719	228	320	21	412
423	0.0011575	251	349	24	447
424	0.0011734	247	332	24	417
425	0.0009409	237	338	20	439
426	0.0012925	228	332	23	436
427	0.0009828	271	355	29	439
428	0.0011543	192	326	24	460
429	0.0010904	287	383	23	479
430	0.00087	301	379	29	457
431	0.0009965	225	324	20	423
432	0.0010841	174	306	24	438
433	0.0011729	215	331	23	447
434	0.0011584	193	321	23	449
435	0.0009213	257	359	25	461
436	0.0009958	223	336	22	449
437	0.0008972	219	310	26	401
438	0.0010325	239	327	24	415
439	0.0010388	311	370	27	429
440	0.0010031	216	315	23	414
441	0.0011488	177	310	26	443
442	0.0013332	295	372	26	449
443	0.0011246	265	347	22	429
444	0.0010285	313	379	25	445
445	0.0009811	254	348	26	442
446	0.000937	252	341	24	430
447	0.0011035	251	334	28	417
448	0.0012303	252	345	25	438
449	0.0009371	307	367	27	427
450	0.0009088	309	385	29	461
451	0.0009566	318	379	26	440
452	0.0013358	191	323	27	455
453	0.0009575	308	361	23	414
454	0.000926	317	373	25	429
455	0.0013013	189	339	24	489
456	0.0008752	258	342	22	426
457	0.0011559	197	325	22	453
458	0.0009967	274	347	23	420
459	0.0008244	244	321	26	398
460	0.0012866	162	309	26	456
461	0.0011969	281	353	25	425
462	0.0008921	210	305	22	400
463	0.0010804	189	330	27	471
464	0.0011423	242	344	24	446
465	0.0009459	200	286	18	372
466	0.0011801	168	296	18	424
467	0.0013512	224	311	22	398
468	0.0010449	197	321	27	445
469	0.0012081	142	306	29	470
470	0.0009471	259	348	27	437
471	0.0010682	273	349	22	425
472	0.0009762	212	312	20	412
473	0.0009428	268	345	24	422
474	0.0008341	279	359	24	439
475	0.000979	291	366	23	441
476	0.0008745	253	335	24	417
477	0.0011786	188	317	19	446
478	0.001221	119	299	26	479
479	0.0009247	229	326	19	423
480	0.0009783	289	361	28	433
481	0.001211	246	341	26	436
482	0.0017923	177	305	23	433
483	0.0010216	187	316	22	445
484	0.0009246	317	372	28	427
485	0.0011727	346	390	29	434
486	0.0010818	209	328	21	447
487	0.0011056	295	365	27	435
488	0.0011926	155	316	27	477
489	0.0010303	242	341	24	440
490	0.0010894	218	334	28	450
491	0.0007874	266	344	22	422
492	0.0010341	179	299	18	419
493	0.0010309	216	323	23	430
494	0.001027	259	344	24	429
495	0.0013127	191	330	23	469
496	0.0011911	226	328	29	430
497	0.0012187	238	340	18	442
498	0.0009283	272	366	29	460
499	0.0011344	211	345	22	479
500	0.0010126	294	368	26	442
501	0.00101	250	343	22	436
502	0.0007772	240	328	26	416
503	0.0011273	229	340	28	451
504	0.0011544	186	316	24	446
505	0.0006971	321	358	25	395
506	0.0011023	291	350	26	409
507	0.0008904	272	353	28	434
508	0.0009537	253	347	24	441
509	0.0011677	213	304	25	395
510	0.0009318	239	320	22	401
511	0.0010177	308	361	28	414
512	0.001117	276	353	25	430
513	0.0011538	251	346	20	441
514	0.0009249	217	333	28	449
515	0.0008648	308	367	25	426
516	0.001208	201	311	23	421
517	0.0009266	227	343	21	459
518	0.0009894	221	322	26	423
519	0.0013017	293	370	23	447
520	0.0009742	282	350	20	418
521	0.0010226	195	319	24	443
522	0.0012476	162	323	18	484
523	0.001105	165	315	24	465
524	0.0010115	180	303	25	426
525	0.0012098	223	330	24	437
526	0.0010469	178	293	24	408
527	0.00102	221	327	24	433
528	0.0009416	281	367	28	453
529	0.0010176	202	319	26	436
530	0.0013628	203	341	21	479
531	0.0008024	251	338	20	425
532	0.0008142	295	364	28	433
533	0.0009252	266	351	24	436
534	0.0010527	238	336	23	434
535	0.0010188	228	324	25	420
536	0.0009918	229	332	23	435
537	0.0010901	236	344	24	452
538	0.0014933	266	362	24	458
539	0.000858	223	341	23	459
540	0.001418	211	323	29	435
541	0.0014114	332	394	29	456
542	0.0010045	251	335	23	419
543	0.0009581	242	325	23	408
544	0.0013583	245	347	23	449
545	0.0010539	269	353	25	437
546	0.001088	265	361	28	457
547	0.0010277	192	291	21	390
548	0.0012024	203	319	26	435
549	0.0012458	197	325	21	453
550	0.0010181	249	356	24	463
551	0.0009098	202	317	25	432
552	0.0009968	208	313	23	418
553	0.0007884	284	353	24	422
554	0.0010042	252	342	27	432
555	0.000985	236	333	28	430
556	0.0011111	243	340	26	437
557	0.0009024	204	310	20	416
558	0.0008921	294	388	27	482
559	0.0013011	156	314	28	472
560	0.0010725	206	328	27	450
561	0.0008883	293	369	28	445
562	0.0013116	281	371	23	461
563	0.0010114	210	323	23	436
564	0.0008385	225	309	20	393
565	0.0008829	304	357	26	410
566	0.0010986	238	342	28	446
567	0.0009841	240	327	23	414
568	0.0012468	230	347	23	464
569	0.0009667	243	335	24	427
570	0.0010967	190	287	19	384
571	0.0009595	267	343	21	419
572	0.0008952	280	349	27	418
573	0.0012794	198	347	29	496
574	0.0011709	204	322	22	440
575	0.0008897	246	328	19	410
576	0.0010933	215	335	26	455
577	0.0011034	216	335	27	454
578	0.0010585	202	329	21	456
579	0.0013345	284	368	25	452
580	0.0010425	228	323	29	418
581	0.0012076	191	323	25	455
582	0.0008489	306	363	24	420
583	0.0010775	245	352	23	459
584	0.0011681	198	320	25	442
585	0.0011991	236	337	26	438
586	0.0012438	235	328	25	421
587	0.0010194	211	328	19	445
588	0.0009329	270	357	29	444
589	0.0010858	229	337	21	445
590	0.000866	243	333	21	423
591	0.0011422	199	312	23	425
592	0.0010909	255	347	28	439
593	0.0013762	171	323	26	475
594	0.0011296	235	328	29	421
595	0.0010176	240	320	27	400
596	0.0009862	242	324	27	406
597	0.0010684	215	336	28	457
598	0.0010525	261	355	29	449
599	0.0010715	268	343	22	418
600	0.0011772	265	354	25	443
601	0.0010542	279	331	22	383
602	0.0009367	297	372	28	447
603	0.0012242	258	336	20	414
604	0.0010782	205	324	22	443
605	0.000913	296	367	25	438
606	0.0011002	245	330	26	415
607	0.0009698	293	365	23	437
608	0.0010992	262	341	29	420
609	0.0012761	205	324	21	443
610	0.0008521	220	313	24	406
611	0.0013304	167	309	20	451
612	0.0012142	253	327	26	401
613	0.0009393	265	349	27	433
614	0.0011977	210	330	25	450
615	0.0024452	151	315	24	479
616	0.0009013	224	325	20	426
617	0.0014369	146	315	29	484
618	0.0009376	237	330	24	423
619	0.0011793	239	336	25	433
620	0.0010382	235	327	28	419
621	0.0011051	274	343	25	412
622	0.0012297	176	313	26	450
623	0.0010238	234	340	22	446
624	0.0009991	234	333	26	432
625	0.0010194	272	342	29	412
626	0.0008374	267	330	19	393
627	0.0009757	242	348	22	454
628	0.0010805	265	350	23	435
629	0.001031	234	334	23	434
630	0.0012859	188	336	25	484
631	0.0010223	179	315	23	451
632	0.0010587	248	320	26	392
633	0.0008462	333	373	24	413
634	0.0012576	208	331	23	454
635	0.0009909	207	331	21	455
636	0.0009446	316	367	28	418
637	0.0011279	197	332	23	467
638	0.0010437	225	326	23	427
639	0.0011184	266	349	25	432
640	0.0010727	234	328	28	422
641	0.0010062	248	331	26	414
642	0.0010942	267	354	26	441
643	0.000922	361	403	27	445
644	0.000906	259	331	23	403
645	0.0008874	231	328	23	425
646	0.0010607	263	353	25	443
647	0.0010418	236	346	21	456
648	0.0008943	270	341	26	412
649	0.0010396	177	324	29	471
650	0.0010837	276	338	19	400
651	0.0009391	311	380	28	449
652	0.0015503	185	304	19	423
653	0.0008945	314	366	25	418
654	0.0009376	321	390	28	459
655	0.0010237	208	323	23	438
656	0.0007706	317	377	27	437
657	0.0010528	247	343	23	439
658	0.001011	272	338	26	404
659	0.0010992	199	331	21	463
660	0.0008143	306	373	21	440
661	0.0009965	259	339	23	419
662	0.0012631	208	323	22	438
663	0.0009841	317	387	29	457
664	0.0009801	249	345	25	441
665	0.0008094	271	342	24	413
666	0.0012284	270	345	27	420
667	0.0009902	195	297	21	399
668	0.0011106	231	333	22	435
669	0.0010565	284	352	27	420
670	0.0010434	191	307	22	423
671	0.0012718	157	310	23	463
672	0.0010391	157	309	24	461
673	0.0011337	268	349	24	430
674	0.0009741	278	353	28	428
675	0.0012331	157	312	29	467
676	0.0011341	254	347	24	440
677	0.0011909	189	314	25	439
678	0.0012926	248	338	24	428
679	0.0013219	122	310	28	498
680	0.0010078	286	377	26	468
681	0.0009279	225	320	19	415
682	0.0010015	275	372	27	469
683	0.0012052	290	362	24	434
684	0.0011126	235	353	23	471
685	0.0010502	185	313	23	441
686	0.0010271	246	341	27	436
687	0.0010461	188	329	28	470
688	0.0007865	277	353	27	429
689	0.0009742	239	317	19	395
690	0.0011221	155	318	28	481
691	0.0010326	239	327	24	415
692	0.0010401	273	349	26	425
693	0.0009945	270	354	28	438
694	0.0010855	236	336	23	436
695	0.0011437	270	366	28	462
696	0.0008868	258	333	27	408
697	0.0008585	301	371	28	441
698	0.0009474	216	335	23	454
699	0.0012837	157	335	24	513
700	0.0009754	300	355	28	410
701	0.0010921	183	304	19	425
702	0.0010159	320	369	27	418
703	0.0007013	271	330	22	389
704	0.0010186	273	357	25	441
705	0.0009453	270	356	27	442
706	0.0009978	305	378	26	451
707	0.0010391	326	379	26	432
708	0.0012917	297	375	25	453
709	0.0010217	337	398	29	459
710	0.0009697	246	364	21	482
711	0.001197	272	367	21	462
712	0.0009358	222	334	27	446
713	0.0010232	234	332	27	430
714	0.0009208	238	323	24	408
715	0.001161	231	330	24	429
716	0.0008142	308	370	26	432
717	0.0010219	191	309	19	427
718	0.0011062	196	330	28	464
719	0.0009873	196	325	26	454
720	0.0011225	233	321	22	409
721	0.0012669	234	324	21	414
722	0.0011473	212	322	27	432
723	0.001064	298	360	21	422
724	0.0011912	230	335	25	440
725	0.0014415	155	317	29	479
726	0.0011185	244	328	20	412
727	0.0008123	282	357	23	432
728	0.0014696	185	320	23	455
729	0.0012953	129	298	27	467
730	0.0010704	261	339	25	417
731	0.0011498	217	321	21	425
732	0.0008408	301	370	29	439
733	0.0010478	192	306	24	420
734	0.0009657	200	313	26	426
735	0.0008011	279	348	25	417
736	0.00089	261	351	23	441
737	0.0009716	297	365	27	433
738	0.0010847	260	338	28	416
739	0.0012087	237	343	23	449
740	0.0010086	195	309	22	423
741	0.0007813	261	332	20	403
742	0.0009817	280	359	24	438
743	0.0010803	189	332	23	475
744	0.0011981	287	355	24	423
745	0.0011396	180	303	21	426
746	0.0007794	263	330	23	397
747	0.0008618	220	313	17	406
748	0.0012315	286	357	24	428
749	0.0010195	308	392	28	476
750	0.0012179	236	346	24	456
751	0.0010473	267	332	24	397
752	0.0011175	272	366	27	460
753	0.0009957	289	361	25	433
754	0.0011706	139	305	29	471
755	0.0010124	200	333	25	466
756	0.0011586	211	324	24	437
757	0.0009493	351	402	28	453
758	0.0011944	190	310	28	430
759	0.0009801	232	327	25	422
760	0.0009394	257	332	28	407
761	0.0009712	286	343	24	400
762	0.0013335	221	320	22	419
763	0.0011052	226	326	22	426
764	0.0007579	279	339	27	399
765	0.0007904	213	291	19	369
766	0.0008529	322	383	28	444
767	0.0009989	271	374	28	477
768	0.0012384	218	327	27	436
769	0.0008618	264	344	22	424
770	0.0009381	285	367	29	449
771	0.0010426	213	302	22	391
772	0.0007798	280	340	27	400
773	0.0010418	215	303	23	391
774	0.0008617	331	390	27	449
775	0.001156	140	299	26	458
776	0.0010399	213	311	19	409
777	0.0009376	210	325	25	440
778	0.0012359	159	313	25	467
779	0.0011213	183	307	23	431
780	0.001006	299	376	26	453
781	0.0009119	335	396	29	457
782	0.0013173	210	336	29	462
783	0.001282	171	321	26	471
784	0.0008251	261	337	21	413
785	0.0012622	159	319	27	479
786	0.0012617	217	326	25	435
787	0.0007531	255	334	25	413
788	0.0009336	242	321	21	400
789	0.001075	279	355	27	431
790	0.0008612	304	368	28	432
791	0.0011625	200	308	21	416
792	0.0013835	312	379	24	446
793	0.0010974	201	325	22	449
794	0.0012963	207	345	25	483
795	0.0009615	267	347	20	427
796	0.0011912	177	324	23	471
797	0.00105	179	309	22	439
798	0.0013387	280	352	23	424
799	0.0011509	174	298	18	422
800	0.0015648	227	332	25	437
801	0.0008249	279	364	24	449
802	0.0009468	215	324	23	433
803	0.0010297	228	342	21	456
804	0.0011979	223	334	27	445
805	0.0011473	255	328	19	401
806	0.0011385	272	371	25	470
807	0.0010781	284	354	26	424
808	0.0010979	177	308	18	439
809	0.0010961	292	375	22	458
810	0.0008616	272	349	29	426
811	0.0009416	279	354	23	429
812	0.0011903	242	328	28	414
813	0.0007697	294	348	27	402
814	0.0008933	267	344	22	421
815	0.0010993	270	344	26	418
816	0.0011616	214	331	26	448
817	0.0009583	210	311	24	412
818	0.001041	207	329	21	451
819	0.0008929	342	376	23	410
820	0.0011765	253	337	23	421
821	0.0010069	235	330	21	425
822	0.0010782	270	341	21	412
823	0.0008402	339	389	25	439
824	0.0009213	264	335	22	406
825	0.0011001	155	294	22	433
826	0.0010869	191	319	21	447
827	0.0010386	342	384	26	426
828	0.0013358	191	329	20	467
829	0.0008777	278	350	24	422
830	0.0010206	243	365	24	487
831	0.0007637	284	340	25	396
832	0.0011482	296	365	25	434
833	0.0014005	216	322	24	428
834	0.0009146	224	324	29	424
835	0.0009587	273	339	28	405
836	0.001253	226	349	25	472
837	0.000819	297	362	29	427
838	0.0010144	246	343	29	440
839	0.0010792	236	324	22	412
840	0.0011898	147	313	24	479
841	0.001267	180	312	26	444
842	0.0011079	161	305	25	449
843	0.0011721	213	324	24	435
844	0.0009477	283	354	26	425
845	0.0010639	234	327	23	420
846	0.0008827	212	296	20	380
847	0.0009617	296	364	22	432
848	0.0009391	206	309	21	412
849	0.0012534	180	325	18	470
850	0.0011299	232	349	24	466
851	0.0011132	241	344	23	447
852	0.0010749	253	349	27	445
853	0.000983	297	347	27	397
854	0.0010192	328	373	27	418
855	0.0011098	243	345	25	447
856	0.0010679	246	331	21	416
857	0.0012568	180	330	27	480
858	0.0009888	265	349	25	433
859	0.0008436	225	329	23	433
860	0.001102	260	357	23	454
861	0.0009337	280	363	26	446
862	0.0015065	228	354	20	480
863	0.0011649	254	331	21	408
864	0.0011721	264	354	26	444
865	0.0013487	258	372	28	486
866	0.0009717	259	337	23	415
867	0.0012052	241	352	24	463
868	0.0011888	286	359	26	432
869	0.0007425	289	339	28	389
870	0.0013228	119	302	22	485
871	0.0008696	243	325	22	407
872	0.0010534	247	338	27	429
873	0.0012176	172	298	23	424
874	0.0009946	269	361	27	453
875	0.0011905	193	327	27	461
876	0.0013046	219	357	26	495
877	0.0012212	277	351	28	425
878	0.0013423	268	343	27	418
879	0.0008392	292	370	28	448
880	0.0009649	255	332	25	409
881	0.0008658	276	340	23	404
882	0.0011065	230	341	20	452
883	0.0008845	233	337	28	441
884	0.0010647	268	353	26	438
885	0.0012462	179	312	21	445
886	0.0014301	248	341	24	434
887	0.0010711	265	331	22	397
888	0.0009408	243	328	25	413
889	0.0009225	183	299	23	415
890	0.0010281	282	363	22	444
891	0.0011321	150	290	22	430
892	0.0012508	226	328	25	430
893	0.0011633	197	312	25	427
894	0.0009813	289	370	29	451
895	0.0011796	236	327	18	418
896	0.0009373	233	338	25	443
897	0.0009961	232	318	21	404
898	0.001079	177	312	22	447
899	0.0013327	233	321	28	409
900	0.0011438	245	336	26	427
901	0.0010258	230	313	24	396
902	0.0011056	244	341	29	438
903	0.0011062	197	324	21	451
904	0.0008611	299	373	28	447
905	0.0010637	186	312	22	438
906	0.0011812	213	328	22	443
907	0.0009873	226	339	28	452
908	0.0011049	280	358	27	436
909	0.0010551	239	331	19	423
910	0.0008755	243	341	26	439
911	0.0011085	275	348	20	421
912	0.0009008	244	330	25	416
913	0.0013082	201	327	24	453
914	0.0010983	249	359	28	469
915	0.0009538	230	330	27	430
916	0.001063	142	289	22	436
917	0.0011484	231	355	26	479
918	0.0008045	273	338	22	403
919	0.0009288	225	306	21	387
920	0.0009746	229	343	29	457
921	0.0008628	251	355	26	459
922	0.0010871	300	374	25	448
923	0.0010763	217	331	26	445
924	0.0011724	214	339	23	464
925	0.0011645	245	328	23	411
926	0.0011454	270	355	27	440
927	0.0009041	332	396	28	460
928	0.0008908	199	318	20	437
929	0.0010146	234	334	25	434
930	0.0009063	267	331	23	395
931	0.0012663	248	342	24	436
932	0.000958	246	354	21	462
933	0.0009553	223	310	21	397
934	0.0010403	203	310	21	417
935	0.0011966	173	297	25	421
936	0.0008789	253	337	27	421
937	0.001246	240	354	29	468
938	0.0008863	228	313	21	398
939	0.0010705	279	323	25	367
940	0.0009542	291	371	26	451
941	0.0013414	154	331	23	508
942	0.0008054	315	366	27	417
943	0.0011195	229	326	26	423
944	0.0012755	168	330	23	492
945	0.0012696	188	302	20	416
946	0.0010418	214	329	25	444
947	0.0009262	344	389	28	434
948	0.0010046	225	345	25	465
949	0.0009904	143	295	21	447
950	0.0011241	217	348	23	479
951	0.00106	244	338	22	432
952	0.0008841	293	358	23	423
953	0.0009239	304	365	27	426
954	0.0011857	198	334	25	470
955	0.0009354	279	363	24	447
956	0.0010823	236	320	25	404
957	0.0012393	245	330	23	415
958	0.0010171	177	313	27	449
959	0.001041	239	332	29	425
960	0.001063	218	311	20	404
961	0.001158	166	300	27	434
962	0.001445	196	332	28	468
963	0.000965	297	357	25	417
964	0.0013216	199	332	22	465
965	0.0009962	325	381	26	437
966	0.0008779	361	411	28	461
967	0.0009405	286	334	26	382
968	0.000955	261	361	29	461
969	0.0008402	356	402	26	448
970	0.0007194	220	292	19	364
971	0.001295	176	299	24	422
972	0.0010344	181	312	24	443
973	0.0011449	308	389	29	470
974	0.0008698	313	372	29	431
975	0.0010772	223	329	28	435
976	0.0009323	242	321	24	400
977	0.0008061	251	332	19	413
978	0.0011118	203	338	27	473
979	0.0008864	308	365	27	422
980	0.0009646	273	347	24	421
981	0.0010421	290	376	28	462
982	0.001245	194	328	22	462
983	0.0011477	227	335	27	443
984	0.0010852	249	348	24	447
985	0.001319	142	317	28	492
986	0.0014637	87	296	28	505
987	0.001263	251	344	28	437
988	0.0010093	250	337	25	424
989	0.0010011	257	347	28	437
990	0.0010618	266	351	26	436
991	0.0011041	201	315	22	429
992	0.0010936	208	321	22	434
993	0.000819	302	357	23	412
994	0.0010026	155	297	24	439
995	0.0012779	191	315	24	439
996	0.0010428	289	367	22	445
997	0.0011081	275	352	22	429
998	0.0009062	347	386	25	425
999	0.0013228	184	312	26	440
mean	0.00105804	240.482	337.432	24.43	434.382

## Sheet: PowerBalance_SEq
	time	SEq	Bal	Reg	Egal
0	0.0007622	218	317	26	416
1	0.000556	131	277	24	423
2	0.0006266	184	331	24	478
3	0.0008189	205	315	18	425
4	0.0006477	78	289	27	500
5	0.0005895	209	311	24	413
6	0.0007799	182	308	23	434
7	0.0006158	203	339	27	475
8	0.0006091	91	276	26	461
9	0.0006286	223	333	25	443
10	0.0008249	210	333	20	456
11	0.0006771	113	293	26	473
12	0.0006309	121	284	28	447
13	0.0007517	111	315	26	519
14	0.0007486	186	312	29	438
15	0.0006256	126	309	28	492
16	0.0007724	222	338	24	454
17	0.000787	141	295	29	449
18	0.0006197	149	293	19	437
19	0.0006206	159	305	26	451
20	0.0007427	135	298	27	461
21	0.0005995	136	301	23	466
22	0.0006547	143	313	24	483
23	0.0006561	218	328	21	438
24	0.0006411	135	314	23	493
25	0.0006207	166	320	24	474
26	0.0006358	147	297	21	447
27	0.0005763	167	292	27	417
28	0.0007771	187	316	22	445
29	0.0008216	147	315	27	483
30	0.0006168	199	311	25	423
31	0.0006074	142	295	20	448
32	0.0007463	113	310	29	507
33	0.0006437	182	306	19	430
34	0.0006114	186	308	29	430
35	0.0006704	106	283	27	460
36	0.0006249	196	297	23	398
37	0.0006247	129	290	23	451
38	0.0006641	117	309	23	501
39	0.0008099	210	327	20	444
40	0.0006449	93	267	20	441
41	0.000588	173	314	18	455
42	0.0005984	103	311	28	519
43	0.0006521	96	281	22	466
44	0.0007858	204	333	27	462
45	0.0006377	207	333	22	459
46	0.0007708	102	300	27	498
47	0.0007425	213	331	21	449
48	0.0007689	190	309	21	428
49	0.0007848	145	303	26	461
50	0.0006345	139	303	28	467
51	0.0008237	103	288	29	473
52	0.0007383	172	287	21	402
53	0.0006783	192	323	25	454
54	0.0007491	143	309	27	475
55	0.0008359	273	352	27	431
56	0.000623	164	303	21	442
57	0.0006287	140	281	28	422
58	0.0005935	174	315	20	456
59	0.0005969	187	319	25	451
60	0.0006411	135	311	23	487
61	0.0005971	76	275	26	474
62	0.0005635	107	284	29	461
63	0.000587	189	309	29	429
64	0.0006774	96	298	28	500
65	0.00062	158	318	25	478
66	0.0006703	161	306	28	451
67	0.0005928	55	290	29	525
68	0.0005883	169	298	29	427
69	0.0006248	101	289	27	477
70	0.0007473	217	328	24	439
71	0.0007639	283	345	29	407
72	0.0007598	152	317	29	482
73	0.0007372	251	346	21	441
74	0.0008108	210	318	23	426
75	0.0007475	232	322	20	412
76	0.0006078	185	301	22	417
77	0.000755	155	326	29	497
78	0.0006091	101	283	23	465
79	0.0006186	142	293	28	444
80	0.0008363	265	348	21	431
81	0.0007549	119	305	28	491
82	0.0006029	219	314	20	409
83	0.0008213	143	299	27	455
84	0.0007809	180	304	21	428
85	0.0008093	184	332	29	480
86	0.0005752	106	278	20	450
87	0.0005849	77	288	23	499
88	0.000793	204	306	18	408
89	0.0009198	206	335	25	464
90	0.0007601	270	347	22	424
91	0.000621	136	295	22	454
92	0.0006	150	317	26	484
93	0.0007672	210	320	23	430
94	0.000764	109	294	29	479
95	0.0007662	116	298	24	480
96	0.0007718	164	323	27	482
97	0.0007708	216	319	23	422
98	0.0005869	120	301	28	482
99	0.0007468	165	319	25	473
100	0.0007112	153	299	24	445
101	0.000615	53	297	25	541
102	0.0007381	142	303	26	464
103	0.0006331	124	292	26	460
104	0.0006518	187	340	29	493
105	0.0008051	201	328	28	455
106	0.0007359	259	358	25	457
107	0.0006148	204	327	26	450
108	0.0006239	180	318	25	456
109	0.0008197	140	321	24	502
110	0.0007842	135	315	28	495
111	0.0007542	102	308	27	514
112	0.0008067	218	315	23	412
113	0.0006347	120	304	27	488
114	0.0006299	165	288	16	411
115	0.0008165	284	356	23	428
116	0.000673	165	316	26	467
117	0.0006571	218	341	28	464
118	0.0006192	181	311	20	441
119	0.0005845	149	283	25	417
120	0.0007325	260	336	29	412
121	0.0007131	184	309	29	434
122	0.0005935	72	291	24	510
123	0.0006226	129	321	29	513
124	0.0007636	196	333	26	470
125	0.0006066	92	280	25	468
126	0.0007798	142	308	26	474
127	0.0006123	159	311	24	463
128	0.0006264	100	304	27	508
129	0.0008468	209	314	19	419
130	0.0006411	165	292	24	419
131	0.0008074	205	321	27	437
132	0.0007517	226	345	20	464
133	0.0006691	130	287	25	444
134	0.0006696	151	306	26	461
135	0.0005893	193	325	19	457
136	0.0009274	167	303	26	439
137	0.0006591	123	287	28	451
138	0.0007246	196	323	24	450
139	0.0006009	210	323	24	436
140	0.0007114	44	300	28	556
141	0.000777	258	328	18	398
142	0.0007852	157	318	24	479
143	0.0008115	157	329	28	501
144	0.0008166	194	339	26	484
145	0.0007719	83	290	27	497
146	0.0006324	219	315	20	411
147	0.0006048	181	313	22	445
148	0.000755	213	336	25	459
149	0.0007889	200	328	24	456
150	0.0007762	225	350	26	475
151	0.0006326	188	312	28	436
152	0.0005872	135	297	25	459
153	0.0007226	164	317	29	470
154	0.0006537	91	299	23	507
155	0.0005851	153	300	28	447
156	0.0006334	128	304	28	480
157	0.0007583	167	323	29	479
158	0.0006467	116	297	23	478
159	0.0007595	156	309	27	462
160	0.0006011	157	303	26	449
161	0.0008265	160	328	25	496
162	0.000633	141	305	28	469
163	0.0007781	237	319	23	401
164	0.0009292	275	365	25	455
165	0.0006331	104	284	28	464
166	0.000621	146	296	23	446
167	0.0007435	222	325	23	428
168	0.0008167	206	328	24	450
169	0.0006918	190	316	23	442
170	0.0006173	78	296	28	514
171	0.000874	218	338	20	458
172	0.0006051	113	297	23	481
173	0.0005864	201	319	26	437
174	0.0005745	144	291	22	438
175	0.000754	157	313	29	469
176	0.0007914	207	317	19	427
177	0.0007882	259	339	27	419
178	0.0008339	161	330	29	499
179	0.0005769	113	298	28	483
180	0.0005926	168	306	21	444
181	0.0007532	281	344	26	407
182	0.000759	164	302	25	440
183	0.0005712	150	281	19	412
184	0.0006456	97	299	26	501
185	0.0006004	149	293	23	437
186	0.0007603	169	320	27	471
187	0.0007985	170	330	28	490
188	0.000675	211	328	22	445
189	0.0006306	213	332	24	451
190	0.0006424	164	310	25	456
191	0.0007683	278	350	23	422
192	0.0006428	167	317	22	467
193	0.0007131	155	323	28	491
194	0.0007992	92	302	27	512
195	0.0007674	112	324	28	536
196	0.0007557	170	312	20	454
197	0.0006492	64	292	28	520
198	0.0007501	184	306	19	428
199	0.0007612	72	296	29	520
200	0.0007709	151	315	28	479
201	0.0007637	150	307	25	464
202	0.0007109	166	313	26	460
203	0.0006566	121	303	29	485
204	0.0006311	189	325	22	461
205	0.000738	89	284	29	479
206	0.0007793	262	358	29	454
207	0.0006681	102	305	29	508
208	0.0007643	164	308	28	452
209	0.0008429	228	323	26	418
210	0.0006532	142	301	22	460
211	0.0008231	15	273	29	531
212	0.00069	158	318	24	478
213	0.0006402	163	330	29	497
214	0.000754	162	322	27	482
215	0.000644	219	335	28	451
216	0.0006319	192	326	28	460
217	0.0005935	109	276	27	443
218	0.0007266	221	323	20	425
219	0.0008057	156	318	25	480
220	0.000773	105	293	28	481
221	0.0007596	104	302	26	500
222	0.0008655	72	293	29	514
223	0.0006295	190	307	19	424
224	0.0006733	45	278	27	511
225	0.0007731	190	304	22	418
226	0.0008363	244	316	21	388
227	0.0007347	238	310	20	382
228	0.0006256	170	306	25	442
229	0.0005971	165	314	24	463
230	0.0006258	89	300	22	511
231	0.0007645	215	314	24	413
232	0.0006294	146	302	25	458
233	0.0006586	122	317	28	512
234	0.0007281	139	293	22	447
235	0.0007568	174	304	22	434
236	0.0005988	149	302	27	455
237	0.0008776	299	366	25	433
238	0.0008006	180	314	29	448
239	0.0007369	173	329	28	485
240	0.0005813	188	314	21	440
241	0.0007827	193	314	28	435
242	0.0008485	154	292	28	430
243	0.0007782	208	316	21	424
244	0.0006544	109	292	27	475
245	0.0007529	183	307	22	431
246	0.0005304	108	269	28	430
247	0.0007238	187	321	24	455
248	0.0006103	221	329	23	437
249	0.0006269	80	304	28	528
250	0.0007842	126	302	28	478
251	0.0005927	102	296	28	490
252	0.0007588	126	296	27	466
253	0.0007258	93	312	28	531
254	0.00063	175	299	21	423
255	0.0005951	53	268	23	483
256	0.0006519	109	302	20	495
257	0.0008046	186	309	25	432
258	0.0008045	117	308	27	499
259	0.0006723	74	283	23	492
260	0.0008795	258	339	26	420
261	0.0007749	209	329	25	449
262	0.0007815	165	320	24	475
263	0.0005733	98	297	27	496
264	0.0006573	178	307	22	436
265	0.0007659	136	314	26	492
266	0.00063	150	322	29	494
267	0.000649	270	358	22	446
268	0.000761	140	307	19	474
269	0.0006158	99	286	29	473
270	0.0007689	164	310	21	456
271	0.0006182	142	308	24	474
272	0.0007732	106	306	28	506
273	0.0007706	137	320	26	503
274	0.0007665	257	342	23	427
275	0.0006277	175	323	20	471
276	0.0007843	256	349	29	442
277	0.0009554	209	322	24	435
278	0.0006584	152	317	24	482
279	0.0007517	202	310	21	418
280	0.0005523	19	267	26	515
281	0.0007158	190	317	19	444
282	0.000783	130	318	28	506
283	0.0007383	239	329	24	419
284	0.0007499	205	302	27	399
285	0.000584	125	310	25	495
286	0.0007794	226	316	20	406
287	0.0008006	162	323	25	484
288	0.0007529	231	339	23	447
289	0.0005871	111	305	29	499
290	0.0007907	130	303	26	476
291	0.000772	258	330	22	402
292	0.000737	223	332	20	441
293	0.0005806	167	315	26	463
294	0.0006318	193	313	19	433
295	0.0007405	176	313	28	450
296	0.0006076	166	306	27	446
297	0.0006524	178	327	21	476
298	0.0007326	254	328	21	402
299	0.0006236	89	285	25	481
300	0.0006638	38	291	28	544
301	0.0006167	147	321	26	495
302	0.000818	279	364	22	449
303	0.0007158	163	315	29	467
304	0.00073	148	313	22	478
305	0.0006582	140	306	29	472
306	0.0006438	174	319	23	464
307	0.0007549	251	352	25	453
308	0.0008761	66	277	29	488
309	0.000574	120	285	23	450
310	0.0006478	171	318	29	465
311	0.0006246	131	318	27	505
312	0.0007815	175	292	29	409
313	0.0008357	15	293	29	571
314	0.0007631	129	289	26	449
315	0.0007363	202	298	27	394
316	0.0007755	171	293	23	415
317	0.000621	86	272	24	458
318	0.0009531	309	350	26	391
319	0.0006623	189	319	19	449
320	0.0008376	234	334	25	434
321	0.0005954	103	293	28	483
322	0.0006683	160	307	25	454
323	0.0006786	160	305	19	450
324	0.0006717	118	312	29	506
325	0.000771	131	303	21	475
326	0.0008401	175	314	19	453
327	0.0007074	84	298	27	512
328	0.0006289	138	288	28	438
329	0.0006279	123	288	20	453
330	0.0007787	183	323	26	463
331	0.0007924	158	320	29	482
332	0.0007908	238	333	25	428
333	0.0006292	190	322	19	454
334	0.0008098	257	328	22	399
335	0.000759	172	322	26	472
336	0.0007477	263	348	23	433
337	0.0006294	116	301	22	486
338	0.0009393	156	297	22	438
339	0.0007716	196	301	19	406
340	0.0005992	197	317	24	437
341	0.0005865	122	300	26	478
342	0.0007972	205	307	21	409
343	0.0006326	175	315	23	455
344	0.0007552	136	307	24	478
345	0.0007679	174	306	27	438
346	0.0006942	181	325	23	469
347	0.0005935	119	309	29	499
348	0.0006059	145	308	26	471
349	0.000587	165	304	26	443
350	0.0006649	65	301	28	537
351	0.0007366	252	347	21	442
352	0.0005748	138	296	28	454
353	0.0006764	175	297	22	419
354	0.0007958	183	299	22	415
355	0.0006355	206	311	26	416
356	0.0008602	202	330	22	458
357	0.0005922	124	303	27	482
358	0.0006116	180	290	25	400
359	0.0008537	213	313	22	413
360	0.0008013	211	333	26	455
361	0.00074	251	334	19	417
362	0.0007638	254	337	21	420
363	0.0007368	245	331	23	417
364	0.0008551	185	338	28	491
365	0.0005919	181	312	22	443
366	0.0006246	140	296	25	452
367	0.0007588	7	264	28	521
368	0.0007676	205	315	27	425
369	0.0007792	96	308	29	520
370	0.0007477	184	320	21	456
371	0.0008	163	314	25	465
372	0.0007659	203	334	20	465
373	0.000774	99	297	24	495
374	0.0007331	186	333	19	480
375	0.0007422	209	316	22	423
376	0.0007546	181	330	22	479
377	0.0009483	127	301	22	475
378	0.00063	195	303	28	411
379	0.0006679	149	321	24	493
380	0.000614	201	303	26	405
381	0.0006831	94	290	26	486
382	0.0005911	120	290	29	460
383	0.0007448	211	327	24	443
384	0.0008231	108	302	29	496
385	0.0006644	194	292	24	390
386	0.0008066	166	333	29	500
387	0.0005808	64	279	24	494
388	0.0006228	86	307	29	528
389	0.0006428	159	321	27	483
390	0.000594	163	298	26	433
391	0.0008403	144	307	22	470
392	0.0007378	202	305	22	408
393	0.0006228	113	295	26	477
394	0.0006264	195	315	23	435
395	0.0007656	274	363	22	452
396	0.0008835	160	304	26	448
397	0.0008627	247	341	19	435
398	0.0006779	158	316	29	474
399	0.0006541	87	300	21	513
400	0.0008252	127	305	28	483
401	0.000654	144	296	22	448
402	0.0007789	219	343	26	467
403	0.0006657	114	285	28	456
404	0.0006102	182	305	23	428
405	0.00068	190	339	28	488
406	0.0007669	135	297	28	459
407	0.0007724	286	343	25	400
408	0.0007689	140	300	21	460
409	0.0006615	138	305	21	472
410	0.0007287	193	321	20	449
411	0.0006204	149	309	28	469
412	0.00079	193	324	26	455
413	0.0007795	170	301	22	432
414	0.0005954	150	302	24	454
415	0.0005884	198	313	17	428
416	0.0007996	233	324	23	415
417	0.0008087	312	357	26	402
418	0.0006287	185	313	21	441
419	0.0007962	207	327	27	447
420	0.0006065	215	312	22	409
421	0.000573	163	308	26	453
422	0.0008236	228	320	21	412
423	0.0006303	210	328	21	446
424	0.0006021	247	332	24	417
425	0.0006526	213	332	29	451
426	0.0007835	141	307	25	473
427	0.0008087	201	328	28	455
428	0.0008124	192	326	24	460
429	0.0005936	175	325	21	475
430	0.0006675	115	313	24	511
431	0.0006068	176	315	20	454
432	0.0006124	102	280	24	458
433	0.0006851	215	331	23	447
434	0.0007885	193	321	23	449
435	0.000666	147	305	25	463
436	0.0007392	187	326	20	465
437	0.0006755	98	286	27	474
438	0.0007703	53	279	27	505
439	0.0007818	150	303	20	456
440	0.0006467	128	282	22	436
441	0.0006038	109	280	25	451
442	0.0007863	295	372	26	449
443	0.0006478	189	322	20	455
444	0.0007832	181	328	20	475
445	0.0007314	227	344	25	461
446	0.0008863	212	317	18	422
447	0.0008258	251	334	28	417
448	0.0008143	252	345	25	438
449	0.0006449	187	324	29	461
450	0.0009352	181	327	24	473
451	0.0007713	154	313	26	472
452	0.0007542	191	323	27	455
453	0.000621	117	311	21	505
454	0.0007648	81	298	29	515
455	0.0007681	189	339	24	489
456	0.0008538	159	306	21	453
457	0.0007702	120	309	27	498
458	0.0007588	197	319	23	441
459	0.0006278	197	300	21	403
460	0.000765	76	294	28	512
461	0.000769	122	299	22	476
462	0.0006311	176	298	27	420
463	0.0006849	145	305	27	465
464	0.0007681	242	344	24	446
465	0.0005865	88	267	29	446
466	0.0006747	74	278	29	482
467	0.0007474	136	291	25	446
468	0.0007454	197	321	27	445
469	0.0006994	142	306	29	470
470	0.0007772	184	319	27	454
471	0.0007075	166	320	22	474
472	0.0007839	212	312	20	412
473	0.000607	71	284	26	497
474	0.0007916	279	359	24	439
475	0.0007653	166	314	27	462
476	0.000621	137	294	27	451
477	0.0007623	188	317	19	446
478	0.0007306	119	299	26	479
479	0.000785	194	314	18	434
480	0.0007398	251	338	20	425
481	0.000651	118	295	25	472
482	0.0006104	160	301	23	442
483	0.0006345	146	311	25	476
484	0.0006984	156	297	22	438
485	0.0007738	141	304	21	467
486	0.0007487	209	328	21	447
487	0.0007698	147	318	24	489
488	0.0007955	155	316	27	477
489	0.0007901	149	327	26	505
490	0.0007877	168	321	26	474
491	0.0006507	148	302	23	456
492	0.0009382	179	299	18	419
493	0.000626	136	299	22	462
494	0.0006159	216	332	24	448
495	0.0007374	147	320	21	493
496	0.0006392	96	297	26	498
497	0.0008076	206	335	21	464
498	0.0007634	164	316	28	468
499	0.0007232	193	337	22	481
500	0.0007121	233	339	26	445
501	0.0007683	202	324	25	446
502	0.0007786	139	294	27	449
503	0.0007248	197	326	26	455
504	0.0006259	142	301	25	460
505	0.0006355	41	264	29	487
506	0.0005637	82	293	29	504
507	0.0008376	216	335	25	454
508	0.0007646	146	314	23	482
509	0.0005683	141	289	26	437
510	0.0007459	203	313	25	423
511	0.0007216	240	339	24	438
512	0.0006223	177	317	21	457
513	0.0010192	138	317	28	496
514	0.0005704	91	281	27	471
515	0.0007528	138	319	24	500
516	0.0006066	134	290	25	446
517	0.0008016	213	341	21	469
518	0.0006054	194	306	26	418
519	0.0006238	180	334	23	488
520	0.000829	282	350	20	418
521	0.0006276	158	300	29	442
522	0.0007742	65	304	29	543
523	0.0007435	157	311	24	465
524	0.0006265	128	286	25	444
525	0.0007682	223	330	24	437
526	0.0007131	178	293	24	408
527	0.0006518	102	292	26	482
528	0.0006213	158	318	27	478
529	0.0006307	110	296	23	482
530	0.0008742	152	329	21	506
531	0.0007714	166	320	21	474
532	0.0005683	122	286	26	450
533	0.0007684	151	309	23	467
534	0.0007637	141	314	28	487
535	0.0006549	201	308	21	415
536	0.0005873	92	291	28	490
537	0.0007926	181	329	24	477
538	0.0007727	203	346	24	489
539	0.0005903	102	305	29	508
540	0.0007584	111	301	29	491
541	0.0006543	165	328	22	491
542	0.0008262	149	312	27	475
543	0.0007758	242	325	23	408
544	0.0006471	143	315	25	487
545	0.0006584	146	303	26	460
546	0.0008431	265	361	28	457
547	0.0006012	192	291	21	390
548	0.0006527	136	303	28	470
549	0.0007337	180	314	21	448
550	0.0008475	249	356	24	463
551	0.0006086	160	297	26	434
552	0.0006033	140	290	27	440
553	0.0005979	128	301	21	474
554	0.0006491	144	306	28	468
555	0.0007811	172	301	21	430
556	0.0005993	131	302	27	473
557	0.0006048	204	310	20	416
558	0.0007677	123	321	23	519
559	0.000672	86	304	28	522
560	0.000759	206	328	27	450
561	0.0006514	185	312	19	439
562	0.0006309	187	331	20	475
563	0.0008067	210	323	23	436
564	0.0005866	127	280	25	433
565	0.0008446	206	313	20	420
566	0.0006219	229	338	28	447
567	0.0006074	103	287	29	471
568	0.0007724	121	334	28	547
569	0.0005901	169	309	28	449
570	0.0006333	190	287	19	384
571	0.0006163	106	292	28	478
572	0.0006299	188	323	28	458
573	0.0008221	87	324	29	561
574	0.0007722	204	322	22	440
575	0.0008152	158	313	25	468
576	0.0005862	82	288	28	494
577	0.0006692	188	319	22	450
578	0.0007846	187	322	22	457
579	0.0007593	122	313	23	504
580	0.000714	228	323	29	418
581	0.0007736	191	323	25	455
582	0.0007513	187	325	24	463
583	0.0007734	191	331	26	471
584	0.0007799	78	295	27	512
585	0.0007389	123	304	28	485
586	0.0007733	213	326	25	439
587	0.0006427	139	305	28	471
588	0.0006686	91	285	25	479
589	0.0007698	16	296	25	576
590	0.0007967	158	319	25	480
591	0.0006506	127	298	28	469
592	0.0005969	161	301	22	441
593	0.0008056	138	314	28	490
594	0.0006292	141	293	24	445
595	0.0007429	240	320	27	400
596	0.0006686	200	302	21	404
597	0.0006002	157	313	27	469
598	0.0006207	189	316	26	443
599	0.0008363	268	343	22	418
600	0.0007209	265	354	25	443
601	0.000646	207	314	20	421
602	0.0007465	297	372	28	447
603	0.0009236	185	324	29	463
604	0.0006163	194	316	22	438
605	0.0008398	188	335	26	482
606	0.0006707	224	322	26	420
607	0.0007612	209	329	22	449
608	0.0008963	182	314	23	446
609	0.0007473	120	300	27	480
610	0.0007752	76	278	29	480
611	0.0006155	136	304	27	472
612	0.0005897	102	285	26	468
613	0.0007391	189	323	25	457
614	0.0006064	79	284	24	489
615	0.0007884	151	315	24	479
616	0.0007546	224	325	20	426
617	0.0009036	30	302	29	574
618	0.0007329	135	295	25	455
619	0.0007268	239	336	25	433
620	0.0007576	30	273	28	516
621	0.0006337	95	289	21	483
622	0.0007552	135	310	26	485
623	0.0007958	234	340	22	446
624	0.0007656	170	309	27	448
625	0.0008066	157	310	27	463
626	0.0006125	121	310	29	499
627	0.0008403	186	340	29	494
628	0.0005838	116	295	23	474
629	0.0006002	82	289	29	496
630	0.0006384	94	297	28	500
631	0.0005922	151	310	23	469
632	0.0007598	173	295	20	417
633	0.0005885	155	304	24	453
634	0.0008187	113	303	29	493
635	0.000632	173	319	21	465
636	0.000637	167	310	21	453
637	0.000804	113	309	25	505
638	0.000754	225	326	23	427
639	0.000876	266	349	25	432
640	0.0008503	113	292	26	471
641	0.0005553	175	304	26	433
642	0.0007348	221	350	26	479
643	0.0007535	231	345	26	459
644	0.000588	136	294	26	452
645	0.0007703	174	303	28	432
646	0.0006208	85	281	23	477
647	0.000674	177	330	21	483
648	0.0006979	158	300	27	442
649	0.0006174	177	324	29	471
650	0.0006639	276	338	19	400
651	0.0006088	91	308	27	525
652	0.0006418	185	304	19	423
653	0.0007728	136	313	29	490
654	0.0007478	164	327	28	490
655	0.0006493	102	301	27	500
656	0.0007793	24	277	28	530
657	0.0007029	161	301	20	441
658	0.0006356	151	294	27	437
659	0.0006182	199	331	21	463
660	0.0006243	216	339	28	462
661	0.0007251	259	339	23	419
662	0.0006082	193	320	21	447
663	0.0007916	109	302	26	495
664	0.0006023	155	314	23	473
665	0.0007472	243	329	24	415
666	0.0007577	270	345	27	420
667	0.0006146	195	297	21	399
668	0.00079	136	314	28	492
669	0.0006321	177	306	27	435
670	0.0006321	132	289	29	446
671	0.0006072	147	307	24	467
672	0.0006464	157	309	24	461
673	0.0008327	214	333	23	452
674	0.0007811	188	301	28	414
675	0.0008744	157	312	29	467
676	0.0006919	173	319	25	465
677	0.0007827	189	314	25	439
678	0.0007307	175	317	24	459
679	0.0006763	102	307	28	512
680	0.0006693	170	335	27	500
681	0.0007948	156	306	26	456
682	0.0006449	186	329	23	472
683	0.0006013	157	321	29	485
684	0.0007398	181	331	23	481
685	0.0007243	87	286	25	485
686	0.0005702	145	294	22	443
687	0.0008211	163	317	28	471
688	0.0006491	141	299	25	457
689	0.0007496	87	288	23	489
690	0.0006132	155	318	28	481
691	0.0007619	210	319	27	428
692	0.0007562	273	349	26	425
693	0.0006056	90	290	26	490
694	0.0007611	186	316	23	446
695	0.0006289	204	326	18	448
696	0.0007397	223	325	26	427
697	0.0006052	179	310	20	441
698	0.0005981	115	309	29	503
699	0.0007804	157	335	24	513
700	0.0005852	224	317	20	410
701	0.0006405	166	299	19	432
702	0.000763	213	325	27	437
703	0.0007372	271	330	22	389
704	0.000694	57	292	29	527
705	0.0006362	160	311	27	462
706	0.0007855	143	319	24	495
707	0.0006944	130	312	26	494
708	0.0008118	121	315	26	509
709	0.0007437	259	345	23	431
710	0.0006199	192	344	23	496
711	0.0007581	200	344	24	488
712	0.0008278	118	299	23	480
713	0.0008075	234	332	27	430
714	0.0008416	238	323	24	408
715	0.0007426	183	311	25	439
716	0.0007768	169	321	25	473
717	0.0006127	191	309	19	427
718	0.0006729	196	330	28	464
719	0.0006498	111	312	26	513
720	0.0006525	153	306	25	459
721	0.0006465	199	309	21	419
722	0.0006106	111	284	24	457
723	0.0006782	110	305	29	500
724	0.0006257	191	318	25	445
725	0.0006095	155	317	29	479
726	0.0007613	151	299	24	447
727	0.0007283	282	357	23	432
728	0.0006557	185	320	23	455
729	0.0006339	129	298	27	467
730	0.0007597	144	315	28	486
731	0.000744	131	309	29	487
732	0.000737	89	298	29	507
733	0.0008174	192	306	24	420
734	0.0005672	162	295	19	428
735	0.0006234	178	306	23	434
736	0.000745	239	339	22	439
737	0.0007573	230	340	24	450
738	0.0007821	146	309	27	472
739	0.0007589	109	304	28	499
740	0.0007557	157	299	22	441
741	0.0008184	171	310	21	449
742	0.0007676	136	313	28	490
743	0.0006328	142	312	23	482
744	0.0006798	193	316	17	439
745	0.0006169	180	303	21	426
746	0.0006351	221	314	21	407
747	0.0007219	220	313	17	406
748	0.0007299	182	317	24	452
749	0.0007218	113	303	23	493
750	0.0006273	135	318	24	501
751	0.0006494	188	307	23	426
752	0.0008526	196	328	26	460
753	0.0007815	237	339	28	441
754	0.0007951	120	303	29	486
755	0.0006816	76	297	29	518
756	0.0006802	142	307	28	472
757	0.0006487	160	315	20	470
758	0.0007465	190	310	28	430
759	0.0007491	95	280	25	465
760	0.000775	208	313	20	418
761	0.0006297	174	311	24	448
762	0.0007037	179	315	27	451
763	0.0006034	139	306	25	473
764	0.0007781	160	277	26	394
765	0.0007375	213	291	19	369
766	0.0007267	60	303	29	546
767	0.000754	172	336	21	500
768	0.0006203	192	321	23	450
769	0.0007045	98	294	27	490
770	0.0007755	248	350	26	452
771	0.0006731	181	295	25	409
772	0.0007719	173	305	22	437
773	0.0005718	138	278	28	418
774	0.0007486	131	292	24	453
775	0.0006013	140	299	26	458
776	0.0007272	118	286	29	454
777	0.000775	139	300	24	461
778	0.0007512	159	313	25	467
779	0.0007274	168	299	23	430
780	0.0007433	191	326	26	461
781	0.0008336	74	298	29	522
782	0.0006252	182	326	29	470
783	0.0006102	136	314	26	492
784	0.0006383	133	306	28	479
785	0.0006092	159	319	27	479
786	0.0007477	217	326	25	435
787	0.0005815	75	280	28	485
788	0.0007801	120	295	25	470
789	0.0007506	161	300	20	439
790	0.0007091	231	348	28	465
791	0.0005835	169	298	19	427
792	0.0007259	219	337	24	455
793	0.0007427	166	316	23	466
794	0.0007741	158	334	29	510
795	0.0006388	185	321	20	457
796	0.0006715	177	324	23	471
797	0.0009827	169	306	20	443
798	0.0006066	133	309	29	485
799	0.000606	125	289	27	453
800	0.000749	201	319	25	437
801	0.000696	227	337	21	447
802	0.0006512	159	303	22	447
803	0.0008034	228	342	21	456
804	0.0006392	223	334	27	445
805	0.0009555	255	328	19	401
806	0.0006477	139	323	28	507
807	0.0006678	171	317	21	463
808	0.0006164	130	301	26	472
809	0.0006713	122	319	28	516
810	0.000662	167	321	26	475
811	0.0007737	279	354	23	429
812	0.0007791	102	299	27	496
813	0.0008246	160	306	28	452
814	0.0007527	102	299	29	496
815	0.0007048	176	318	25	460
816	0.0006118	65	276	29	487
817	0.0007776	182	301	19	420
818	0.0006221	193	326	21	459
819	0.0006857	220	335	23	450
820	0.0007669	160	310	23	460
821	0.0006461	168	309	22	450
822	0.0007891	128	310	27	492
823	0.000775	217	337	20	457
824	0.0007584	209	314	20	419
825	0.0005776	155	294	22	433
826	0.0005902	126	303	20	480
827	0.0008046	148	329	26	510
828	0.0006706	148	318	20	488
829	0.0007856	188	320	28	452
830	0.0007766	243	365	24	487
831	0.000698	132	302	26	472
832	0.0007219	203	325	27	447
833	0.0007488	216	322	24	428
834	0.0007704	196	315	29	434
835	0.0006638	218	306	17	394
836	0.0006372	83	315	27	547
837	0.0007895	164	306	20	448
838	0.0007946	246	343	29	440
839	0.0006103	93	279	26	465
840	0.0006901	147	313	24	479
841	0.000832	173	310	26	447
842	0.0007679	111	289	24	467
843	0.0007435	169	309	25	449
844	0.0006368	203	319	19	435
845	0.0008129	148	285	29	422
846	0.0007638	56	271	28	486
847	0.0007493	125	327	25	529
848	0.0008486	142	292	25	442
849	0.0008038	146	312	26	478
850	0.0007982	137	326	27	515
851	0.0007348	241	344	23	447
852	0.0005795	126	304	28	482
853	0.0006087	155	293	26	431
854	0.0005777	128	297	25	466
855	0.0006667	216	334	24	452
856	0.0006727	229	328	19	427
857	0.0007412	180	330	27	480
858	0.000747	204	323	20	442
859	0.0006248	190	310	22	430
860	0.0006348	122	321	29	520
861	0.0007563	141	323	27	505
862	0.0008284	107	314	25	521
863	0.0008283	217	324	23	431
864	0.0007575	147	312	27	477
865	0.0008119	144	331	29	518
866	0.0008078	120	302	23	484
867	0.0007623	220	349	22	478
868	0.0006316	121	303	27	485
869	0.0008272	230	317	24	404
870	0.0006554	92	297	26	502
871	0.000572	128	308	28	488
872	0.0005925	149	305	24	461
873	0.0006484	172	298	23	424
874	0.0006341	124	311	29	498
875	0.0007805	193	327	27	461
876	0.0008587	219	357	26	495
877	0.0007661	277	351	28	425
878	0.0008505	123	309	28	495
879	0.0007762	131	298	28	465
880	0.0006024	78	278	24	478
881	0.0005823	130	299	26	468
882	0.000613	214	331	20	448
883	0.0007935	233	337	28	441
884	0.0007532	255	344	26	433
885	0.0007838	179	312	21	445
886	0.0007874	248	341	24	434
887	0.0006642	247	320	19	393
888	0.0007818	152	309	22	466
889	0.0006346	120	282	26	444
890	0.0006768	191	323	21	455
891	0.0006425	150	290	22	430
892	0.0007959	226	328	25	430
893	0.0005987	119	291	26	463
894	0.000919	207	341	26	475
895	0.0006497	216	324	19	432
896	0.0006216	201	326	25	451
897	0.00059	64	273	28	482
898	0.0006515	127	303	23	479
899	0.0006194	123	296	28	469
900	0.0006573	144	307	24	470
901	0.0006005	180	306	24	432
902	0.0006492	138	310	24	482
903	0.00061	150	309	22	468
904	0.0007895	183	315	28	447
905	0.0006086	138	298	24	458
906	0.0007659	213	328	22	443
907	0.0007285	152	297	20	442
908	0.0007811	45	282	25	519
909	0.0007401	224	326	19	428
910	0.0007429	214	336	27	458
911	0.0008033	163	320	26	477
912	0.0006313	244	330	25	416
913	0.000658	54	289	29	524
914	0.0008518	206	332	23	458
915	0.0006819	94	288	26	482
916	0.000778	142	289	22	436
917	0.0007411	97	316	26	535
918	0.000668	180	302	27	424
919	0.0005838	201	290	19	379
920	0.0007195	124	298	23	472
921	0.000758	153	315	21	477
922	0.0008047	221	335	21	449
923	0.0006539	82	285	20	488
924	0.0006535	114	309	26	504
925	0.0007033	245	328	23	411
926	0.0007124	133	314	21	495
927	0.0006483	132	304	29	476
928	0.0008334	153	309	28	465
929	0.0007522	234	334	25	434
930	0.0007349	267	331	23	395
931	0.0008231	202	334	25	466
932	0.0007808	141	326	28	511
933	0.0005759	90	284	28	478
934	0.0005736	140	288	24	436
935	0.0005787	122	284	24	446
936	0.0007705	179	316	20	453
937	0.0007794	183	326	28	469
938	0.0005448	112	290	29	468
939	0.0007798	175	291	25	407
940	0.0006592	213	337	23	461
941	0.0008581	69	305	25	541
942	0.0009185	170	304	20	438
943	0.0007319	142	311	28	480
944	0.0008271	119	314	23	509
945	0.0006193	188	302	20	416
946	0.0006957	182	323	25	464
947	0.0005881	163	298	19	433
948	0.0008301	165	314	27	463
949	0.0006412	143	295	21	447
950	0.0008016	217	348	23	479
951	0.0005999	174	324	23	474
952	0.0007863	108	298	27	488
953	0.0007477	183	322	23	461
954	0.0005697	65	296	28	527
955	0.0007494	180	327	24	474
956	0.0006753	146	302	25	458
957	0.0006516	164	313	21	462
958	0.0006605	75	294	28	513
959	0.0007341	239	332	29	425
960	0.0007869	218	311	20	404
961	0.0006052	166	300	27	434
962	0.0006006	113	299	27	485
963	0.0007751	165	312	29	459
964	0.0007505	184	324	22	464
965	0.0007924	131	328	27	525
966	0.0006076	132	307	20	482
967	0.0005828	176	302	24	428
968	0.0009294	87	305	28	523
969	0.0006376	150	290	23	430
970	0.0006297	220	292	19	364
971	0.0006077	176	299	24	422
972	0.0007314	150	309	27	468
973	0.000668	126	329	29	532
974	0.0006243	120	293	24	466
975	0.000681	137	305	26	473
976	0.0007302	149	297	23	445
977	0.0008487	199	317	21	435
978	0.0008028	131	324	27	517
979	0.0007486	199	319	18	439
980	0.0007329	169	300	21	431
981	0.0008025	137	300	25	463
982	0.0005902	127	303	26	479
983	0.000815	212	329	25	446
984	0.000754	187	325	21	463
985	0.0007877	80	305	28	530
986	0.0007396	78	292	28	506
987	0.000756	251	344	28	437
988	0.0007817	108	301	28	494
989	0.0007595	205	321	28	437
990	0.0005341	96	293	28	490
991	0.000781	85	283	29	481
992	0.0006786	172	310	18	448
993	0.0007471	191	309	21	427
994	0.0006332	45	268	25	491
995	0.000787	176	312	24	448
996	0.0006048	186	330	25	474
997	0.0006389	217	325	27	433
998	0.0008321	244	333	24	422
999	0.0005889	93	289	26	485
mean	0.000708666	163.897	312.124	24.699	460.351

## Sheet: PowerBalance_Bal
	time	SEq	Bal	Reg	Egal
0	0.0007656	218	317	26	416
1	0.0005772	131	277	24	423
2	0.000624	184	331	24	478
3	0.0007348	205	315	18	425
4	0.0005717	78	289	27	500
5	0.0005919	209	311	24	413
6	0.0008272	182	308	23	434
7	0.0006728	203	339	27	475
8	0.000597	91	276	26	461
9	0.0006897	223	333	25	443
10	0.0007712	210	333	20	456
11	0.0007118	113	293	26	473
12	0.0007637	121	284	28	447
13	0.00072	111	315	26	519
14	0.0006508	186	312	29	438
15	0.000621	126	309	28	492
16	0.0007301	222	338	24	454
17	0.0007469	141	295	29	449
18	0.0006245	149	293	19	437
19	0.0006013	159	305	26	451
20	0.0007459	135	298	27	461
21	0.0005844	136	301	23	466
22	0.0006791	143	313	24	483
23	0.0006714	218	328	21	438
24	0.0006808	135	314	23	493
25	0.0006436	166	320	24	474
26	0.0005901	147	297	21	447
27	0.0005662	167	292	27	417
28	0.0007668	187	316	22	445
29	0.0007504	147	315	27	483
30	0.0006316	199	311	25	423
31	0.0006064	142	295	20	448
32	0.0007411	113	310	29	507
33	0.0006226	182	306	19	430
34	0.0006185	186	308	29	430
35	0.0007306	106	283	27	460
36	0.0006263	196	297	23	398
37	0.0005836	129	290	23	451
38	0.0008083	117	309	23	501
39	0.0008114	210	327	20	444
40	0.0006227	93	267	20	441
41	0.0006107	173	314	18	455
42	0.0005965	103	311	28	519
43	0.0006413	96	281	22	466
44	0.0008596	204	333	27	462
45	0.0006052	207	333	22	459
46	0.0007813	102	300	27	498
47	0.0007397	213	331	21	449
48	0.000759	190	309	21	428
49	0.0007461	145	303	26	461
50	0.0005985	139	303	28	467
51	0.0007845	103	288	29	473
52	0.0007346	172	287	21	402
53	0.0006254	192	323	25	454
54	0.0007487	143	309	27	475
55	0.0007663	273	352	27	431
56	0.0006533	164	303	21	442
57	0.0006425	140	281	28	422
58	0.0005873	174	315	20	456
59	0.0005887	187	319	25	451
60	0.0006623	135	311	23	487
61	0.0005764	76	275	26	474
62	0.0005591	107	284	29	461
63	0.000581	189	309	29	429
64	0.0007668	96	298	28	500
65	0.0006047	158	318	25	478
66	0.0006557	161	306	28	451
67	0.0006175	55	290	29	525
68	0.0006555	169	298	29	427
69	0.0006374	101	289	27	477
70	0.0007226	217	328	24	439
71	0.000781	283	345	29	407
72	0.0008103	152	317	29	482
73	0.0008116	251	346	21	441
74	0.0008142	210	318	23	426
75	0.0008802	232	322	20	412
76	0.0005988	185	301	22	417
77	0.0007499	155	326	29	497
78	0.0005889	101	283	23	465
79	0.0007906	142	293	28	444
80	0.000829	265	348	21	431
81	0.0007862	119	305	28	491
82	0.0005927	219	314	20	409
83	0.000824	143	299	27	455
84	0.000785	180	304	21	428
85	0.0007876	184	332	29	480
86	0.0005939	106	278	20	450
87	0.0006017	77	288	23	499
88	0.000792	204	306	18	408
89	0.0007841	206	335	25	464
90	0.000824	270	347	22	424
91	0.0006186	136	295	22	454
92	0.0005922	150	317	26	484
93	0.0007466	210	320	23	430
94	0.0008484	109	294	29	479
95	0.0007505	116	298	24	480
96	0.0015116	164	323	27	482
97	0.0007248	216	319	23	422
98	0.0006056	120	301	28	482
99	0.0007628	165	319	25	473
100	0.0006317	153	299	24	445
101	0.0005891	53	297	25	541
102	0.0007819	142	303	26	464
103	0.0006606	124	292	26	460
104	0.000904	187	340	29	493
105	0.0007867	201	328	28	455
106	0.0007171	259	358	25	457
107	0.0005912	204	327	26	450
108	0.0006157	180	318	25	456
109	0.000804	140	321	24	502
110	0.0008268	135	315	28	495
111	0.0007628	102	308	27	514
112	0.0007635	218	315	23	412
113	0.0006311	120	304	27	488
114	0.0005969	165	288	16	411
115	0.000778	284	356	23	428
116	0.0006543	165	316	26	467
117	0.0006469	218	341	28	464
118	0.0006789	181	311	20	441
119	0.0006019	149	283	25	417
120	0.0007308	260	336	29	412
121	0.0007068	184	309	29	434
122	0.000597	72	291	24	510
123	0.000612	129	321	29	513
124	0.0007713	196	333	26	470
125	0.0005807	92	280	25	468
126	0.0008412	142	308	26	474
127	0.0006339	159	311	24	463
128	0.000674	100	304	27	508
129	0.000796	209	314	19	419
130	0.0006303	165	292	24	419
131	0.0007627	205	321	27	437
132	0.0007395	226	345	20	464
133	0.0006399	130	287	25	444
134	0.0006676	151	306	26	461
135	0.0006261	193	325	19	457
136	0.0007819	167	303	26	439
137	0.0006061	123	287	28	451
138	0.0006418	196	323	24	450
139	0.0006473	210	323	24	436
140	0.0006609	44	300	28	556
141	0.0007666	258	328	18	398
142	0.00076	157	318	24	479
143	0.0007612	157	329	28	501
144	0.0008234	194	339	26	484
145	0.000809	83	290	27	497
146	0.000626	219	315	20	411
147	0.0005975	181	313	22	445
148	0.0007465	213	336	25	459
149	0.0007261	200	328	24	456
150	0.0006702	225	350	26	475
151	0.0006251	188	312	28	436
152	0.0006137	135	297	25	459
153	0.000714	164	317	29	470
154	0.0006973	91	299	23	507
155	0.000595	153	300	28	447
156	0.0006156	128	304	28	480
157	0.0008052	167	323	29	479
158	0.0006594	116	297	23	478
159	0.0007703	156	309	27	462
160	0.0006165	157	303	26	449
161	0.0008087	160	328	25	496
162	0.00063	141	305	28	469
163	0.0007828	237	319	23	401
164	0.0007628	275	365	25	455
165	0.0006129	104	284	28	464
166	0.000619	146	296	23	446
167	0.0005991	222	325	23	428
168	0.0008212	206	328	24	450
169	0.0006374	190	316	23	442
170	0.000658	78	296	28	514
171	0.0008181	218	338	20	458
172	0.0006099	113	297	23	481
173	0.0006029	201	319	26	437
174	0.0005689	144	291	22	438
175	0.0007588	157	313	29	469
176	0.000752	207	317	19	427
177	0.0008283	259	339	27	419
178	0.0007714	161	330	29	499
179	0.000568	113	298	28	483
180	0.0005807	168	306	21	444
181	0.0007423	281	344	26	407
182	0.0007793	164	302	25	440
183	0.0005963	150	281	19	412
184	0.000645	97	299	26	501
185	0.0005711	149	293	23	437
186	0.000819	169	320	27	471
187	0.00078	170	330	28	490
188	0.0005926	211	328	22	445
189	0.0006344	213	332	24	451
190	0.0006485	164	310	25	456
191	0.0007828	278	350	23	422
192	0.0006551	167	317	22	467
193	0.000782	155	323	28	491
194	0.0007787	92	302	27	512
195	0.0007174	112	324	28	536
196	0.0007801	170	312	20	454
197	0.0005947	64	292	28	520
198	0.0007402	184	306	19	428
199	0.0007702	72	296	29	520
200	0.0007529	151	315	28	479
201	0.0007895	150	307	25	464
202	0.0006309	166	313	26	460
203	0.0005757	121	303	29	485
204	0.0006318	189	325	22	461
205	0.000671	89	284	29	479
206	0.0007837	262	358	29	454
207	0.0006325	102	305	29	508
208	0.0007636	164	308	28	452
209	0.0007583	228	323	26	418
210	0.0006455	142	301	22	460
211	0.0007904	15	273	29	531
212	0.0006736	158	318	24	478
213	0.0006466	163	330	29	497
214	0.0009228	162	322	27	482
215	0.0006583	219	335	28	451
216	0.0006124	192	326	28	460
217	0.0005947	109	276	27	443
218	0.0007196	221	323	20	425
219	0.0007829	156	318	25	480
220	0.0007557	105	293	28	481
221	0.0007381	104	302	26	500
222	0.0009081	72	293	29	514
223	0.0005988	190	307	19	424
224	0.0006808	45	278	27	511
225	0.0007887	190	304	22	418
226	0.0007473	244	316	21	388
227	0.0007708	238	310	20	382
228	0.0006575	170	306	25	442
229	0.0006076	165	314	24	463
230	0.0006705	89	300	22	511
231	0.0008665	215	314	24	413
232	0.000639	146	302	25	458
233	0.0006565	122	317	28	512
234	0.0007449	139	293	22	447
235	0.0007512	174	304	22	434
236	0.0005974	149	302	27	455
237	0.0008465	299	366	25	433
238	0.0008222	180	314	29	448
239	0.0007807	173	329	28	485
240	0.0005919	188	314	21	440
241	0.0007448	193	314	28	435
242	0.0007533	154	292	28	430
243	0.0007665	208	316	21	424
244	0.0006772	109	292	27	475
245	0.0007519	183	307	22	431
246	0.0005471	108	269	28	430
247	0.0007306	187	321	24	455
248	0.0006016	221	329	23	437
249	0.0006884	80	304	28	528
250	0.000833	126	302	28	478
251	0.0005893	102	296	28	490
252	0.0007667	126	296	27	466
253	0.0007959	93	312	28	531
254	0.000666	175	299	21	423
255	0.0006362	53	268	23	483
256	0.0006633	109	302	20	495
257	0.0007448	186	309	25	432
258	0.0007576	117	308	27	499
259	0.0006755	74	283	23	492
260	0.0007489	258	339	26	420
261	0.0008017	209	329	25	449
262	0.0007635	165	320	24	475
263	0.0006853	98	297	27	496
264	0.0006357	178	307	22	436
265	0.0006277	136	314	26	492
266	0.0006674	150	322	29	494
267	0.0007245	270	358	22	446
268	0.0007811	140	307	19	474
269	0.0006892	99	286	29	473
270	0.000763	164	310	21	456
271	0.0005915	142	308	24	474
272	0.0007434	106	306	28	506
273	0.0007604	137	320	26	503
274	0.0007669	257	342	23	427
275	0.0006061	175	323	20	471
276	0.0007412	256	349	29	442
277	0.0007421	209	322	24	435
278	0.000624	152	317	24	482
279	0.0007436	202	310	21	418
280	0.0006724	19	267	26	515
281	0.0006469	190	317	19	444
282	0.0007503	130	318	28	506
283	0.0007658	239	329	24	419
284	0.0007894	205	302	27	399
285	0.0005879	125	310	25	495
286	0.0008196	226	316	20	406
287	0.0007948	162	323	25	484
288	0.0007431	231	339	23	447
289	0.0006223	111	305	29	499
290	0.0007952	130	303	26	476
291	0.0007757	258	330	22	402
292	0.0007274	223	332	20	441
293	0.0005826	167	315	26	463
294	0.0006294	193	313	19	433
295	0.0007843	176	313	28	450
296	0.0005959	166	306	27	446
297	0.0006097	178	327	21	476
298	0.0007918	254	328	21	402
299	0.0006199	89	285	25	481
300	0.0007031	38	291	28	544
301	0.000641	147	321	26	495
302	0.0007924	279	364	22	449
303	0.0006544	163	315	29	467
304	0.0007353	148	313	22	478
305	0.0006614	140	306	29	472
306	0.0006438	174	319	23	464
307	0.00079	251	352	25	453
308	0.0007588	66	277	29	488
309	0.0005832	120	285	23	450
310	0.0006367	171	318	29	465
311	0.0007737	131	318	27	505
312	0.0007641	175	292	29	409
313	0.0007936	15	293	29	571
314	0.0007693	129	289	26	449
315	0.0008041	202	298	27	394
316	0.0007679	171	293	23	415
317	0.0006102	86	272	24	458
318	0.0007623	309	350	26	391
319	0.0006803	189	319	19	449
320	0.0008019	234	334	25	434
321	0.000728	103	293	28	483
322	0.0006341	160	307	25	454
323	0.0006405	160	305	19	450
324	0.0006436	118	312	29	506
325	0.0008042	131	303	21	475
326	0.0007669	175	314	19	453
327	0.0006265	84	298	27	512
328	0.0006631	138	288	28	438
329	0.0006319	123	288	20	453
330	0.0008563	183	323	26	463
331	0.0007838	158	320	29	482
332	0.0007375	238	333	25	428
333	0.0006506	190	322	19	454
334	0.0007994	257	328	22	399
335	0.0007342	172	322	26	472
336	0.0008665	263	348	23	433
337	0.0006114	116	301	22	486
338	0.000748	156	297	22	438
339	0.0007688	196	301	19	406
340	0.0007288	197	317	24	437
341	0.0006078	122	300	26	478
342	0.0007832	205	307	21	409
343	0.0005964	175	315	23	455
344	0.000759	136	307	24	478
345	0.0008155	174	306	27	438
346	0.0006533	181	325	23	469
347	0.0006058	119	309	29	499
348	0.0006302	145	308	26	471
349	0.000601	165	304	26	443
350	0.0006896	65	301	28	537
351	0.0007506	252	347	21	442
352	0.0005797	138	296	28	454
353	0.0006583	175	297	22	419
354	0.0007902	183	299	22	415
355	0.0006514	206	311	26	416
356	0.0007747	202	330	22	458
357	0.000595	124	303	27	482
358	0.0006199	180	290	25	400
359	0.0007875	213	313	22	413
360	0.0008009	211	333	26	455
361	0.0007509	251	334	19	417
362	0.0007732	254	337	21	420
363	0.0007274	245	331	23	417
364	0.0011901	185	338	28	491
365	0.000611	181	312	22	443
366	0.0006525	140	296	25	452
367	0.0007732	28	263	28	498
368	0.0007206	205	315	27	425
369	0.000775	96	308	29	520
370	0.0007556	184	320	21	456
371	0.0007608	163	314	25	465
372	0.000797	203	334	20	465
373	0.0008764	99	297	24	495
374	0.000659	186	333	19	480
375	0.0007547	209	316	22	423
376	0.0006743	181	330	22	479
377	0.0008083	127	301	22	475
378	0.0006202	195	303	28	411
379	0.0007097	149	321	24	493
380	0.000702	201	303	26	405
381	0.0005998	94	290	26	486
382	0.0005944	120	290	29	460
383	0.0007374	211	327	24	443
384	0.0007916	108	302	29	496
385	0.0006517	194	292	24	390
386	0.0007484	166	333	29	500
387	0.0006354	64	279	24	494
388	0.0006259	86	307	29	528
389	0.0006298	159	321	27	483
390	0.0005632	163	298	26	433
391	0.0006284	144	307	22	470
392	0.0007765	202	305	22	408
393	0.0006484	113	295	26	477
394	0.0006453	195	315	23	435
395	0.0007424	274	363	22	452
396	0.0007612	160	304	26	448
397	0.0007888	247	341	19	435
398	0.000645	158	316	29	474
399	0.0007114	87	300	21	513
400	0.0007588	127	305	28	483
401	0.00077	144	296	22	448
402	0.0007775	219	343	26	467
403	0.0006141	114	285	28	456
404	0.0006447	182	305	23	428
405	0.0006787	190	339	28	488
406	0.0008545	135	297	28	459
407	0.0007953	286	343	25	400
408	0.00078	140	300	21	460
409	0.0005888	138	305	21	472
410	0.0007465	193	321	20	449
411	0.0005953	149	309	28	469
412	0.0010966	193	324	26	455
413	0.0008227	170	301	22	432
414	0.0005988	150	302	24	454
415	0.0006328	198	313	17	428
416	0.0007904	233	324	23	415
417	0.0008331	312	357	26	402
418	0.0006819	185	313	21	441
419	0.0007402	207	327	27	447
420	0.0005916	215	312	22	409
421	0.0005738	163	308	26	453
422	0.0007189	228	320	21	412
423	0.0006895	210	328	21	446
424	0.0006071	247	332	24	417
425	0.000634	213	332	29	451
426	0.000797	141	307	25	473
427	0.0007262	201	328	28	455
428	0.0007651	192	326	24	460
429	0.0006263	175	325	21	475
430	0.0007111	115	313	24	511
431	0.0006489	176	315	20	454
432	0.0008153	102	280	24	458
433	0.000814	215	331	23	447
434	0.0009794	193	321	23	449
435	0.0006297	147	305	25	463
436	0.0007419	187	326	20	465
437	0.0006735	98	286	27	474
438	0.0007813	53	279	27	505
439	0.0007618	150	303	20	456
440	0.0006409	128	282	22	436
441	0.0006156	109	280	25	451
442	0.0008214	295	372	26	449
443	0.000645	189	322	20	455
444	0.000796	181	328	20	475
445	0.0007447	227	344	25	461
446	0.0008313	212	317	18	422
447	0.0008097	251	334	28	417
448	0.0007937	252	345	25	438
449	0.000593	187	324	29	461
450	0.0007949	181	327	24	473
451	0.000779	154	313	26	472
452	0.0007522	191	323	27	455
453	0.0006045	117	311	21	505
454	0.0007713	81	298	29	515
455	0.0008046	189	339	24	489
456	0.0008375	159	306	21	453
457	0.0008318	120	309	27	498
458	0.0007767	197	319	23	441
459	0.0006395	197	300	21	403
460	0.0008181	76	294	28	512
461	0.0007897	122	299	22	476
462	0.0006048	176	298	27	420
463	0.000663	145	305	27	465
464	0.0007469	242	344	24	446
465	0.0005924	88	267	29	446
466	0.0006681	74	278	29	482
467	0.0007417	136	291	25	446
468	0.0008004	197	321	27	445
469	0.000657	142	306	29	470
470	0.0008251	184	319	27	454
471	0.0007582	166	320	22	474
472	0.0007782	212	312	20	412
473	0.0006402	71	284	26	497
474	0.0007922	279	359	24	439
475	0.0008135	166	314	27	462
476	0.0006253	137	294	27	451
477	0.0007618	188	317	19	446
478	0.0007558	119	299	26	479
479	0.0007754	194	314	18	434
480	0.0007706	251	338	20	425
481	0.0006469	118	295	25	472
482	0.0005931	160	301	23	442
483	0.0006158	146	311	25	476
484	0.0006332	156	297	22	438
485	0.0007558	141	304	21	467
486	0.0007733	209	328	21	447
487	0.0007206	147	318	24	489
488	0.0008093	155	316	27	477
489	0.0007588	149	327	26	505
490	0.0007901	168	321	26	474
491	0.0006559	148	302	23	456
492	0.0007504	179	299	18	419
493	0.0006282	136	299	22	462
494	0.0006201	216	332	24	448
495	0.0008284	147	320	21	493
496	0.0006346	96	297	26	498
497	0.0007716	206	335	21	464
498	0.0007278	164	316	28	468
499	0.0006442	193	337	22	481
500	0.0007177	233	339	26	445
501	0.0007703	202	324	25	446
502	0.0008377	139	294	27	449
503	0.0007316	197	326	26	455
504	0.0006657	142	301	25	460
505	0.0006162	41	264	29	487
506	0.0005591	82	293	29	504
507	0.0007429	216	335	25	454
508	0.000776	146	314	23	482
509	0.0005544	141	289	26	437
510	0.0007691	203	313	25	423
511	0.0007268	240	339	24	438
512	0.0005945	177	317	21	457
513	0.0007907	138	317	28	496
514	0.0005292	91	281	27	471
515	0.0006496	138	319	24	500
516	0.0006199	134	290	25	446
517	0.0007973	213	341	21	469
518	0.0006281	194	306	26	418
519	0.0006663	180	334	23	488
520	0.0007787	282	350	20	418
521	0.0005668	158	300	29	442
522	0.0007893	65	304	29	543
523	0.0007389	157	311	24	465
524	0.0005964	128	286	25	444
525	0.0007513	223	330	24	437
526	0.0007194	178	293	24	408
527	0.0006354	102	292	26	482
528	0.0006419	158	318	27	478
529	0.0006711	110	296	23	482
530	0.000776	152	329	21	506
531	0.0008541	166	320	21	474
532	0.0006247	122	286	26	450
533	0.0007637	151	309	23	467
534	0.000793	141	314	28	487
535	0.0006131	201	308	21	415
536	0.0005845	92	291	28	490
537	0.0008243	181	329	24	477
538	0.0007735	203	346	24	489
539	0.0005996	102	305	29	508
540	0.0007792	111	301	29	491
541	0.0007009	165	328	22	491
542	0.0008299	149	312	27	475
543	0.0008539	242	325	23	408
544	0.0006594	143	315	25	487
545	0.0007346	146	303	26	460
546	0.0008665	265	361	28	457
547	0.000589	192	291	21	390
548	0.0006606	136	303	28	470
549	0.0007868	180	314	21	448
550	0.0008243	249	356	24	463
551	0.0006284	160	297	26	434
552	0.0005952	140	290	27	440
553	0.0006128	128	301	21	474
554	0.0006595	144	306	28	468
555	0.000804	172	301	21	430
556	0.0005866	131	302	27	473
557	0.0005848	204	310	20	416
558	0.0007521	123	321	23	519
559	0.0006394	86	304	28	522
560	0.0009094	206	328	27	450
561	0.0006517	185	312	19	439
562	0.0006358	187	331	20	475
563	0.0007163	210	323	23	436
564	0.0005879	127	280	25	433
565	0.0007884	206	313	20	420
566	0.000614	229	338	28	447
567	0.0006643	103	287	29	471
568	0.0007808	121	334	28	547
569	0.000598	169	309	28	449
570	0.0006316	190	287	19	384
571	0.0006004	106	292	28	478
572	0.0006577	188	323	28	458
573	0.0007765	87	324	29	561
574	0.0007835	204	322	22	440
575	0.0007791	158	313	25	468
576	0.0005791	82	288	28	494
577	0.0006163	188	319	22	450
578	0.0007737	187	322	22	457
579	0.0007475	122	313	23	504
580	0.0007529	228	323	29	418
581	0.0008495	191	323	25	455
582	0.0008304	187	325	24	463
583	0.0007673	191	331	26	471
584	0.0007692	78	295	27	512
585	0.0007302	123	304	28	485
586	0.0007526	213	326	25	439
587	0.0006932	139	305	28	471
588	0.0006297	91	285	25	479
589	0.0008888	16	296	25	576
590	0.0007521	158	319	25	480
591	0.0007743	127	298	28	469
592	0.0006013	161	301	22	441
593	0.0008432	138	314	28	490
594	0.0005912	141	293	24	445
595	0.0007517	240	320	27	400
596	0.000685	200	302	21	404
597	0.0006028	157	313	27	469
598	0.0006123	189	316	26	443
599	0.0008119	268	343	22	418
600	0.0007674	265	354	25	443
601	0.0006282	207	314	20	421
602	0.000742	297	372	28	447
603	0.0007989	185	324	29	463
604	0.0006475	194	316	22	438
605	0.0008154	188	335	26	482
606	0.0006238	224	322	26	420
607	0.000752	209	329	22	449
608	0.0007972	182	314	23	446
609	0.0007638	120	300	27	480
610	0.0007869	76	278	29	480
611	0.000652	136	304	27	472
612	0.0005992	102	285	26	468
613	0.0007604	189	323	25	457
614	0.0006586	79	284	24	489
615	0.0009583	151	315	24	479
616	0.0007374	224	325	20	426
617	0.0007724	30	302	29	574
618	0.0006491	135	295	25	455
619	0.0007553	239	336	25	433
620	0.0007794	30	273	28	516
621	0.000609	95	289	21	483
622	0.000751	135	310	26	485
623	0.0007677	234	340	22	446
624	0.0007651	170	309	27	448
625	0.000839	157	310	27	463
626	0.0006899	121	310	29	499
627	0.0008037	186	340	29	494
628	0.0005978	116	295	23	474
629	0.0005851	82	289	29	496
630	0.0006309	94	297	28	500
631	0.0005931	151	310	23	469
632	0.0007673	173	295	20	417
633	0.0006089	155	304	24	453
634	0.0007405	113	303	29	493
635	0.0006166	173	319	21	465
636	0.0006697	167	310	21	453
637	0.0007512	113	309	25	505
638	0.0007695	225	326	23	427
639	0.0008326	266	349	25	432
640	0.0007556	113	292	26	471
641	0.0006366	175	304	26	433
642	0.0007387	221	350	26	479
643	0.0007785	231	345	26	459
644	0.0005931	136	294	26	452
645	0.0007726	174	303	28	432
646	0.0006125	85	281	23	477
647	0.0007429	177	330	21	483
648	0.0006313	158	300	27	442
649	0.0007723	177	324	29	471
650	0.0006286	276	338	19	400
651	0.0006055	91	308	27	525
652	0.0008098	185	304	19	423
653	0.0007784	136	313	29	490
654	0.000849	164	327	28	490
655	0.0006574	102	301	27	500
656	0.0007722	24	277	28	530
657	0.0007199	161	301	20	441
658	0.0006244	151	294	27	437
659	0.0006141	199	331	21	463
660	0.0006328	216	339	28	462
661	0.0007367	259	339	23	419
662	0.0006306	193	320	21	447
663	0.0008807	109	302	26	495
664	0.0006035	155	314	23	473
665	0.0007313	243	329	24	415
666	0.0007866	270	345	27	420
667	0.0006045	195	297	21	399
668	0.0007976	136	314	28	492
669	0.0007779	177	306	27	435
670	0.0006484	132	289	29	446
671	0.0006037	147	307	24	467
672	0.0006222	157	309	24	461
673	0.0008132	214	333	23	452
674	0.0007529	188	301	28	414
675	0.0007562	157	312	29	467
676	0.0006121	173	319	25	465
677	0.0008554	189	314	25	439
678	0.0007453	175	317	24	459
679	0.0006186	102	307	28	512
680	0.0006847	170	335	27	500
681	0.0008549	156	306	26	456
682	0.0007692	186	329	23	472
683	0.0005976	157	321	29	485
684	0.0008165	181	331	23	481
685	0.0007418	87	286	25	485
686	0.0005623	145	294	22	443
687	0.0007937	163	317	28	471
688	0.0006589	141	299	25	457
689	0.0007548	87	288	23	489
690	0.0006152	155	318	28	481
691	0.0007957	210	319	27	428
692	0.0008154	273	349	26	425
693	0.0005723	90	290	26	490
694	0.0007412	186	316	23	446
695	0.0006222	204	326	18	448
696	0.0007858	223	325	26	427
697	0.0007045	179	310	20	441
698	0.000593	115	309	29	503
699	0.0007844	157	335	24	513
700	0.0006502	224	317	20	410
701	0.000655	166	299	19	432
702	0.0007759	213	325	27	437
703	0.0007544	271	330	22	389
704	0.0006742	57	292	29	527
705	0.0006148	160	311	27	462
706	0.0007845	143	319	24	495
707	0.000653	130	312	26	494
708	0.0008278	121	315	26	509
709	0.0007681	259	345	23	431
710	0.0007419	192	344	23	496
711	0.0007609	200	344	24	488
712	0.0009018	118	299	23	480
713	0.0007809	234	332	27	430
714	0.000772	238	323	24	408
715	0.0007534	183	311	25	439
716	0.0007616	169	321	25	473
717	0.0006081	191	309	19	427
718	0.0006084	196	330	28	464
719	0.0006449	111	312	26	513
720	0.0006561	153	306	25	459
721	0.0006535	199	309	21	419
722	0.0005913	111	284	24	457
723	0.0006222	110	305	29	500
724	0.0006583	191	318	25	445
725	0.0006156	155	317	29	479
726	0.0007322	151	299	24	447
727	0.0007696	282	357	23	432
728	0.000619	185	320	23	455
729	0.0006195	129	298	27	467
730	0.0006376	144	315	28	486
731	0.0007731	131	309	29	487
732	0.0007552	89	298	29	507
733	0.0008791	192	306	24	420
734	0.0005738	162	295	19	428
735	0.0006442	178	306	23	434
736	0.00076	239	339	22	439
737	0.0007788	230	340	24	450
738	0.0007975	146	309	27	472
739	0.0008804	109	304	28	499
740	0.0007256	157	299	22	441
741	0.0007749	171	310	21	449
742	0.0007327	136	313	28	490
743	0.0006658	142	312	23	482
744	0.000701	193	316	17	439
745	0.0005898	180	303	21	426
746	0.0006176	221	314	21	407
747	0.000616	220	313	17	406
748	0.0007587	182	317	24	452
749	0.0006541	113	303	23	493
750	0.0007356	135	318	24	501
751	0.0006069	188	307	23	426
752	0.000803	196	328	26	460
753	0.0008801	237	339	28	441
754	0.0007565	120	303	29	486
755	0.000655	76	297	29	518
756	0.000652	142	307	28	472
757	0.0006411	160	315	20	470
758	0.0007423	190	310	28	430
759	0.0007621	95	280	25	465
760	0.0007653	208	313	20	418
761	0.0006352	174	311	24	448
762	0.0006002	179	315	27	451
763	0.0006912	139	306	25	473
764	0.0007358	160	277	26	394
765	0.0007465	213	291	19	369
766	0.0006458	60	303	29	546
767	0.0007581	172	336	21	500
768	0.0006317	192	321	23	450
769	0.0006219	98	294	27	490
770	0.0007635	248	350	26	452
771	0.0006091	181	295	25	409
772	0.0005985	173	305	22	437
773	0.000587	138	278	28	418
774	0.0007076	131	292	24	453
775	0.0006008	140	299	26	458
776	0.0007304	118	286	29	454
777	0.0008374	139	300	24	461
778	0.0007793	159	313	25	467
779	0.0006158	168	299	23	430
780	0.0007349	191	326	26	461
781	0.0007794	74	298	29	522
782	0.0006373	182	326	29	470
783	0.0006052	136	314	26	492
784	0.0007928	133	306	28	479
785	0.000582	159	319	27	479
786	0.0006825	217	326	25	435
787	0.0005477	75	280	28	485
788	0.000756	120	295	25	470
789	0.0007568	161	300	20	439
790	0.0007025	231	348	28	465
791	0.0006915	169	298	19	427
792	0.0007374	219	337	24	455
793	0.0007385	166	316	23	466
794	0.0008846	158	334	29	510
795	0.0006501	185	321	20	457
796	0.0008102	177	324	23	471
797	0.0008109	169	306	20	443
798	0.0006252	133	309	29	485
799	0.0005552	125	289	27	453
800	0.0009019	201	319	25	437
801	0.0006468	227	337	21	447
802	0.0006504	159	303	22	447
803	0.0007611	228	342	21	456
804	0.0012016	223	334	27	445
805	0.0007644	255	328	19	401
806	0.0006641	139	323	28	507
807	0.0006656	171	317	21	463
808	0.0006258	130	301	26	472
809	0.0006552	122	319	28	516
810	0.0007141	167	321	26	475
811	0.0007827	279	354	23	429
812	0.0006376	102	299	27	496
813	0.0007794	160	306	28	452
814	0.0007621	102	299	29	496
815	0.0007088	176	318	25	460
816	0.0006605	65	276	29	487
817	0.0007687	182	301	19	420
818	0.0007694	193	326	21	459
819	0.0006454	220	335	23	450
820	0.0007506	160	310	23	460
821	0.0006189	168	309	22	450
822	0.0008199	128	310	27	492
823	0.0007542	217	337	20	457
824	0.0007804	209	314	20	419
825	0.0006218	155	294	22	433
826	0.0006256	126	303	20	480
827	0.0006548	148	329	26	510
828	0.0006693	148	318	20	488
829	0.0007766	188	320	28	452
830	0.0007357	243	365	24	487
831	0.0006701	132	302	26	472
832	0.0007192	203	325	27	447
833	0.0007801	216	322	24	428
834	0.0008323	196	315	29	434
835	0.0006609	218	306	17	394
836	0.0006591	83	315	27	547
837	0.0007427	164	306	20	448
838	0.0008099	246	343	29	440
839	0.0005962	93	279	26	465
840	0.0006334	147	313	24	479
841	0.0007735	173	310	26	447
842	0.0005813	111	289	24	467
843	0.0007526	169	309	25	449
844	0.0007144	203	319	19	435
845	0.0007996	148	285	29	422
846	0.0007692	56	271	28	486
847	0.0008102	125	327	25	529
848	0.0007359	142	292	25	442
849	0.0007407	146	312	26	478
850	0.0007601	137	326	27	515
851	0.0007705	241	344	23	447
852	0.0005888	126	304	28	482
853	0.0006997	155	293	26	431
854	0.0005982	128	297	25	466
855	0.0006286	216	334	24	452
856	0.0006198	229	328	19	427
857	0.0007219	180	330	27	480
858	0.0007594	204	323	20	442
859	0.0006108	190	310	22	430
860	0.0006403	122	321	29	520
861	0.0007482	141	323	27	505
862	0.0008575	107	314	25	521
863	0.000755	217	324	23	431
864	0.0007435	147	312	27	477
865	0.0008375	144	331	29	518
866	0.0007754	120	302	23	484
867	0.0008572	220	349	22	478
868	0.0006557	121	303	27	485
869	0.0007869	230	317	24	404
870	0.0006445	92	297	26	502
871	0.0005705	128	308	28	488
872	0.0006469	149	305	24	461
873	0.0008493	172	298	23	424
874	0.0007062	124	311	29	498
875	0.0007958	193	327	27	461
876	0.0008463	219	357	26	495
877	0.0007316	277	351	28	425
878	0.0006495	123	309	28	495
879	0.0007514	131	298	28	465
880	0.0006689	78	278	24	478
881	0.0005838	130	299	26	468
882	0.0006136	214	331	20	448
883	0.0008095	233	337	28	441
884	0.000749	255	344	26	433
885	0.0009089	179	312	21	445
886	0.0007798	248	341	24	434
887	0.0006432	247	320	19	393
888	0.0008209	152	309	22	466
889	0.0006583	120	282	26	444
890	0.0007054	191	323	21	455
891	0.0006061	150	290	22	430
892	0.0007286	226	328	25	430
893	0.0006155	119	291	26	463
894	0.0008647	207	341	26	475
895	0.0006447	216	324	19	432
896	0.0006086	201	326	25	451
897	0.0006041	64	273	28	482
898	0.0006565	127	303	23	479
899	0.0005913	123	296	28	469
900	0.0006497	144	307	24	470
901	0.0005846	180	306	24	432
902	0.0007239	138	310	24	482
903	0.0006397	150	309	22	468
904	0.0007623	183	315	28	447
905	0.0006067	138	298	24	458
906	0.0007914	213	328	22	443
907	0.0007335	152	297	20	442
908	0.0007709	45	282	25	519
909	0.0007378	224	326	19	428
910	0.00076	214	336	27	458
911	0.0008129	163	320	26	477
912	0.0006495	244	330	25	416
913	0.0006744	54	289	29	524
914	0.0006206	206	332	23	458
915	0.0006033	94	288	26	482
916	0.000779	142	289	22	436
917	0.0006668	97	316	26	535
918	0.0009543	180	302	27	424
919	0.0005813	201	290	19	379
920	0.0006403	124	298	23	472
921	0.0007823	153	315	21	477
922	0.0007691	221	335	21	449
923	0.0006712	82	285	20	488
924	0.0006509	114	309	26	504
925	0.000699	245	328	23	411
926	0.0006721	133	314	21	495
927	0.0007919	132	304	29	476
928	0.0009193	153	309	28	465
929	0.0007193	234	334	25	434
930	0.0007344	267	331	23	395
931	0.0009307	202	334	25	466
932	0.0007482	141	326	28	511
933	0.0005876	90	284	28	478
934	0.0005685	140	288	24	436
935	0.0005606	122	284	24	446
936	0.0007456	179	316	20	453
937	0.0008405	183	326	28	469
938	0.0005855	112	290	29	468
939	0.0007423	175	291	25	407
940	0.0006132	213	337	23	461
941	0.0007676	69	305	25	541
942	0.0007555	170	304	20	438
943	0.0008386	142	311	28	480
944	0.0008447	119	314	23	509
945	0.0006209	188	302	20	416
946	0.0007047	182	323	25	464
947	0.000567	163	298	19	433
948	0.0007409	165	314	27	463
949	0.0006341	143	295	21	447
950	0.0007733	217	348	23	479
951	0.0006539	174	324	23	474
952	0.000821	108	298	27	488
953	0.000734	183	322	23	461
954	0.0005791	65	296	28	527
955	0.0007942	180	327	24	474
956	0.0006744	146	302	25	458
957	0.0006178	164	313	21	462
958	0.0006532	75	294	28	513
959	0.0008366	239	332	29	425
960	0.0007925	218	311	20	404
961	0.0005961	166	300	27	434
962	0.0006188	113	299	27	485
963	0.0007828	165	312	29	459
964	0.0007733	184	324	22	464
965	0.0007622	131	328	27	525
966	0.0005907	132	307	20	482
967	0.0005993	176	302	24	428
968	0.0007864	87	305	28	523
969	0.0006032	150	290	23	430
970	0.0006403	220	292	19	364
971	0.0006785	176	299	24	422
972	0.0007322	150	309	27	468
973	0.0006418	126	329	29	532
974	0.0005997	120	293	24	466
975	0.0006235	137	305	26	473
976	0.0007394	149	297	23	445
977	0.0008137	199	317	21	435
978	0.0008827	131	324	27	517
979	0.0006177	199	319	18	439
980	0.0007989	169	300	21	431
981	0.0007778	137	300	25	463
982	0.0006695	127	303	26	479
983	0.0007856	212	329	25	446
984	0.0007662	187	325	21	463
985	0.0008336	80	305	28	530
986	0.0007498	78	292	28	506
987	0.0007687	251	344	28	437
988	0.000811	108	301	28	494
989	0.000838	205	321	28	437
990	0.0005648	96	293	28	490
991	0.0008364	85	283	29	481
992	0.0006601	172	310	18	448
993	0.000777	191	309	21	427
994	0.0006464	45	268	25	491
995	0.0008178	176	312	24	448
996	0.0006527	186	330	25	474
997	0.000601	217	325	27	433
998	0.0007373	244	333	24	422
999	0.0006021	93	289	26	485
mean	0.000709895	163.918	312.123	24.699	460.328
