# Supplementary material
Source: ML conference proceedings conference paper supplement (https://openreview.net/forum?id=2rAiDBJgR_)
Supplement: supplementary_material [file UU_size-20_test.xlsx]

## Sheet: GS_MaleOpt
	time	SEq	Bal	Reg	Egal
0	0.0001785	58	92	19	126
1	0.0001523	110	129	18	148
2	0.000185	21	79	13	137
3	0.0001609	59	98	11	137
4	0.0001752	47	97	12	147
5	0.0001642	71	110	18	149
6	0.0001757	21	88	19	155
7	0.0001532	56	91	13	126
8	0.0001588	89	117	15	145
9	0.0001545	114	138	19	162
10	0.0001624	44	108	17	172
11	0.0001652	31	92	13	153
12	0.0001876	54	94	18	134
13	0.0001654	10	58	14	106
14	0.0001814	1	59	11	117
15	0.0001567	57	95	17	133
16	0.0001643	19	79	14	139
17	0.0001682	123	141	19	159
18	0.0001756	40	91	18	142
19	0.000162	57	91	17	125
20	0.0001916	105	134	18	163
21	0.0001998	34	79	9	124
22	0.0001851	140	163	19	186
23	0.0001704	58	92	15	126
24	0.0001599	82	119	16	156
25	0.0001754	85	123	19	161
26	0.0002342	69	105	17	141
27	0.0001988	42	81	18	120
28	0.0001571	15	60	11	105
29	0.0001565	49	90	16	131
30	0.0001688	10	70	16	130
31	0.0001877	83	109	17	135
32	0.0001697	61	92	19	123
33	0.0001794	8	84	18	160
34	0.0001957	35	72	11	109
35	0.0001938	51	87	14	123
36	0.0001665	6	66	17	126
37	0.0001529	87	112	19	137
38	0.0001766	68	94	17	120
39	0.0001685	24	79	15	134
40	0.000168	5	68	12	131
41	0.0002003	117	138	16	159
42	0.0001758	111	136	17	161
43	0.0001687	34	73	15	112
44	0.0001692	60	95	17	130
45	0.000189	47	88	13	129
46	0.0001743	30	81	16	132
47	0.0001573	94	121	18	148
48	0.0001584	49	97	14	145
49	0.0001601	64	93	17	122
50	0.0001719	46	95	13	144
51	0.0001594	34	84	17	134
52	0.0001608	128	150	19	172
53	0.0001661	22	67	11	112
54	0.0001658	122	144	17	166
55	0.0001609	71	96	19	121
56	0.0001625	91	128	19	165
57	0.0001602	101	134	19	167
58	0.0001692	92	124	17	156
59	0.0001507	124	154	18	184
60	0.0001603	107	133	19	159
61	0.0001743	102	122	19	142
62	0.0001747	88	126	16	164
63	0.0001988	19	72	16	125
64	0.0001749	137	162	19	187
65	0.0001713	75	107	14	139
66	0.0001641	64	98	17	132
67	0.0001582	97	125	19	153
68	0.0001667	58	107	14	156
69	0.0001552	129	155	18	181
70	0.000161	61	92	18	123
71	0.000236	45	89	19	133
72	0.0001809	68	95	12	122
73	0.0001578	92	123	19	154
74	0.0002039	66	101	16	136
75	0.0001532	89	108	16	127
76	0.0001759	42	92	12	142
77	0.0001777	99	117	18	135
78	0.0001806	13	72	9	131
79	0.0001773	39	86	12	133
80	0.0001725	2	55	13	108
81	0.0001646	106	144	18	182
82	0.0001706	88	121	17	154
83	0.0001949	183	194	17	205
84	0.0001794	26	65	13	104
85	0.0001756	128	148	15	168
86	0.0001795	25	85	13	145
87	0.0001689	4	76	18	148
88	0.0001978	66	111	14	156
89	0.0001761	47	94	13	141
90	0.000181	92	117	16	142
91	0.0001878	57	89	14	121
92	0.0001898	44	80	14	116
93	0.0001743	73	97	18	121
94	0.0001601	66	91	16	116
95	0.0001639	109	139	18	169
96	0.0001631	15	66	19	117
97	0.0001694	67	94	14	121
98	0.0001729	100	130	17	160
99	0.0001588	104	130	14	156
100	0.0001681	29	71	12	113
101	0.0002253	109	135	16	161
102	0.0001546	93	121	16	149
103	0.0001655	101	130	18	159
104	0.0001595	86	118	16	150
105	0.0001745	109	144	19	179
106	0.0001802	17	67	13	117
107	0.0002026	96	135	17	174
108	0.0001578	74	109	16	144
109	0.0001663	13	70	10	127
110	0.0001648	114	135	19	156
111	0.000184	7	75	17	143
112	0.0002031	100	133	19	166
113	0.0002153	81	119	18	157
114	0.0001997	39	76	17	113
115	0.0001569	109	133	19	157
116	0.0001604	88	125	18	162
117	0.0001756	95	130	19	165
118	0.0001652	68	105	12	142
119	0.0001761	41	84	16	127
120	0.0001752	97	125	18	153
121	0.0001726	51	91	12	131
122	0.0001694	67	102	14	137
123	0.0001702	77	105	17	133
124	0.0001577	45	84	18	123
125	0.0001735	13	70	14	127
126	0.0001776	8	64	15	120
127	0.0001693	48	92	17	136
128	0.0001583	68	107	19	146
129	0.0001684	15	81	13	147
130	0.0001733	9	65	13	121
131	0.0001597	79	105	17	131
132	0.0001675	42	86	18	130
133	0.0001547	90	118	18	146
134	0.0001979	53	87	19	121
135	0.0001612	127	154	19	181
136	0.0001925	38	70	11	102
137	0.0001856	77	111	19	145
138	0.000167	60	99	15	138
139	0.0001657	76	110	13	144
140	0.000197	26	75	11	124
141	0.0001745	27	94	19	161
142	0.0001671	52	106	18	160
143	0.0001685	3	71	14	139
144	0.0001527	91	117	19	143
145	0.0001894	27	84	15	141
146	0.0002086	79	115	18	151
147	0.0001572	79	104	17	129
148	0.0001696	43	84	16	125
149	0.0001617	18	71	15	124
150	0.000178	44	92	18	140
151	0.0001798	21	74	13	127
152	0.0001728	76	106	18	136
153	0.0001718	44	95	17	146
154	0.0001918	3	68	16	133
155	0.0001703	65	107	12	149
156	0.000165	51	96	10	141
157	0.0001544	94	118	16	142
158	0.0001711	62	99	18	136
159	0.0001733	106	129	18	152
160	0.00016	122	143	19	164
161	0.0001629	52	96	18	140
162	0.0001687	79	112	16	145
163	0.0001687	14	68	14	122
164	0.000165	23	74	16	125
165	0.000167	64	103	12	142
166	0.0002034	18	91	19	164
167	0.0001718	8	52	13	96
168	0.0001798	28	77	12	126
169	0.0001542	95	127	17	159
170	0.0001691	152	172	19	192
171	0.0001553	39	87	15	135
172	0.0001629	29	76	14	123
173	0.0001783	81	120	18	159
174	0.0001629	45	93	14	141
175	0.0001866	41	106	16	171
176	0.0001812	9	68	15	127
177	0.0001681	6	76	13	146
178	0.0001614	49	83	14	117
179	0.0002125	43	90	13	137
180	0.0001839	21	74	13	127
181	0.0001582	55	90	16	125
182	0.0001995	87	117	19	147
183	0.0001997	61	88	13	115
184	0.0001674	28	74	15	120
185	0.0001552	126	152	18	178
186	0.0001781	66	103	19	140
187	0.0001566	101	127	16	153
188	0.0001771	39	80	16	121
189	0.0001657	90	121	15	152
190	0.0001755	71	116	16	161
191	0.0001854	8	66	12	124
192	0.0001771	28	83	19	138
193	0.0001859	56	104	19	152
194	0.0001713	41	86	17	131
195	0.0001555	56	88	16	120
196	0.000182	78	117	18	156
197	0.0001614	50	91	16	132
198	0.0001683	57	95	18	133
199	0.0001973	50	88	18	126
200	0.0002025	21	89	17	157
201	0.0001692	39	83	15	127
202	0.0001757	2	76	14	150
203	0.0001704	24	78	15	132
204	0.0001711	61	116	16	171
205	0.0001652	120	155	19	190
206	0.0001979	44	96	15	148
207	0.0001546	32	65	14	98
208	0.0001969	44	83	15	122
209	0.0001759	18	68	13	118
210	0.0003002	7	70	16	133
211	0.0001639	72	109	15	146
212	0.0001699	92	127	18	162
213	0.0001601	28	78	11	128
214	0.0001641	135	155	18	175
215	0.0001665	42	90	15	138
216	0.0001833	52	78	18	104
217	0.0001897	40	72	19	104
218	0.0001587	84	120	16	156
219	0.0001649	68	112	13	156
220	0.000161	124	140	16	156
221	0.0001709	58	111	19	164
222	0.0001801	16	76	14	136
223	0.0001666	53	98	19	143
224	0.0001609	109	133	17	157
225	0.0001895	68	112	14	156
226	0.000165	60	88	12	116
227	0.0001815	30	70	17	110
228	0.0001577	143	168	19	193
229	0.0001577	46	83	13	120
230	0.000188	65	102	12	139
231	0.0001668	29	80	15	131
232	0.000175	54	100	18	146
233	0.0001761	21	75	11	129
234	0.000162	31	79	13	127
235	0.0001873	20	70	11	120
236	0.000173	99	137	19	175
237	0.0001828	41	88	19	135
238	0.0001688	44	104	19	164
239	0.000168	42	101	13	160
240	0.0001885	115	131	18	147
241	0.0001733	13	75	15	137
242	0.0001762	78	121	17	164
243	0.0002255	24	82	14	140
244	0.0001791	16	72	10	128
245	0.000218	67	94	15	121
246	0.0001696	113	137	17	161
247	0.0001662	78	114	19	150
248	0.0001842	129	155	18	181
249	0.000165	53	90	16	127
250	0.0001588	76	112	16	148
251	0.0001691	6	66	11	126
252	0.0001564	71	110	14	149
253	0.000166	88	126	17	164
254	0.0001609	95	119	16	143
255	0.0001785	44	87	17	130
256	0.0001649	77	110	16	143
257	0.0001639	73	109	13	145
258	0.0001803	79	111	12	143
259	0.0001565	128	146	19	164
260	0.000209	29	95	16	161
261	0.0001636	152	174	18	196
262	0.0001865	28	78	15	128
263	0.0001573	127	145	16	163
264	0.0001791	23	76	14	129
265	0.0001484	103	123	17	143
266	0.0001771	10	68	17	126
267	0.000196	52	101	17	150
268	0.0001796	62	116	18	170
269	0.0001786	42	97	17	152
270	0.0001741	35	72	15	109
271	0.0001642	86	125	13	164
272	0.0001717	85	116	18	147
273	0.0001652	59	95	16	131
274	0.000182	39	86	15	133
275	0.0001807	14	68	15	122
276	0.0001643	60	101	18	142
277	0.0001756	90	111	14	132
278	0.0001731	94	118	15	142
279	0.0001799	63	107	17	151
280	0.0001817	3	72	19	141
281	0.0002762	35	86	17	137
282	0.0001657	70	105	17	140
283	0.0001692	131	160	18	189
284	0.0001744	79	122	17	165
285	0.0001742	76	114	17	152
286	0.0001818	73	104	18	135
287	0.0001739	80	110	18	140
288	0.000215	98	128	17	158
289	0.0001754	16	59	15	102
290	0.0002196	103	120	19	137
291	0.0001891	42	93	13	144
292	0.0001584	61	99	17	137
293	0.0001596	39	88	16	137
294	0.0001652	116	134	17	152
295	0.0001525	124	139	18	154
296	0.0001744	6	77	18	148
297	0.0001545	154	178	19	202
298	0.0001662	26	76	14	126
299	0.0001836	25	81	18	137
300	0.0001786	74	118	19	162
301	0.0001762	65	106	15	147
302	0.0001666	44	83	16	122
303	0.0001971	13	70	19	127
304	0.0001827	31	83	15	135
305	0.000186	97	135	16	173
306	0.0001601	117	147	19	177
307	0.0001662	32	81	18	130
308	0.0001757	133	154	19	175
309	0.0001567	100	120	17	140
310	0.0001619	75	108	14	141
311	0.0001809	24	72	9	120
312	0.0001958	21	82	17	143
313	0.0001797	91	120	19	149
314	0.0001831	18	70	17	122
315	0.0001575	71	100	14	129
316	0.00017	43	95	16	147
317	0.0002103	7	66	12	125
318	0.0001723	55	107	18	159
319	0.0001559	81	106	16	131
320	0.0001565	53	95	14	137
321	0.000156	126	147	16	168
322	0.0001919	24	84	17	144
323	0.0001612	27	70	11	113
324	0.0001681	45	87	19	129
325	0.0001784	87	129	15	171
326	0.0001579	73	121	15	169
327	0.0002095	127	150	19	173
328	0.0001694	44	88	15	132
329	0.0001791	48	81	18	114
330	0.0001873	6	74	16	142
331	0.0001689	65	107	19	149
332	0.0001791	120	153	18	186
333	0.0001942	31	85	18	139
334	0.0002102	59	100	17	141
335	0.0002706	97	132	18	167
336	0.0001812	114	142	18	170
337	0.0001595	58	102	15	146
338	0.0001601	87	116	18	145
339	0.0001851	12	60	12	108
340	0.0002026	74	107	15	140
341	0.0001736	49	102	14	155
342	0.0001521	152	168	16	184
343	0.0001785	31	89	18	147
344	0.0001772	37	89	16	141
345	0.0001765	59	110	16	161
346	0.0001738	19	77	11	135
347	0.0001588	100	122	14	144
348	0.000156	97	124	17	151
349	0.000159	32	88	15	144
350	0.0001695	31	75	11	119
351	0.0001618	104	131	18	158
352	0.0001666	80	119	16	158
353	0.0001793	122	151	18	180
354	0.0001659	27	80	19	133
355	0.0001713	39	72	17	105
356	0.0001554	75	113	18	151
357	0.0001597	35	83	12	131
358	0.0001979	43	101	15	159
359	0.000155	86	105	15	124
360	0.0001866	22	69	11	116
361	0.000155	35	77	16	119
362	0.0001731	52	92	14	132
363	0.000156	28	76	17	124
364	0.0001924	45	93	13	141
365	0.0001667	48	86	12	124
366	0.0001663	67	100	16	133
367	0.000159	49	83	15	117
368	0.0001718	80	109	15	138
369	0.0001617	112	138	19	164
370	0.0001863	147	167	18	187
371	0.0001605	104	127	19	150
372	0.0001771	22	76	19	130
373	0.0001665	72	118	12	164
374	0.0001678	31	92	17	153
375	0.0001762	88	113	17	138
376	0.0001853	61	106	17	151
377	0.0001646	45	87	14	129
378	0.0001655	104	125	19	146
379	0.0001584	98	132	16	166
380	0.0001819	44	82	11	120
381	0.0001728	18	77	15	136
382	0.0001815	91	127	17	163
383	0.0001757	37	80	11	123
384	0.000192	84	118	14	152
385	0.0001893	48	111	17	174
386	0.0001808	35	75	10	115
387	0.0001645	39	89	13	139
388	0.0001658	57	91	15	125
389	0.0001768	4	77	15	150
390	0.0001683	93	130	17	167
391	0.0001692	18	62	15	106
392	0.0001793	4	73	17	142
393	0.000165	111	136	15	161
394	0.0001592	87	109	16	131
395	0.0001745	67	96	16	125
396	0.0001671	48	100	18	152
397	0.0001824	53	84	17	115
398	0.0001893	24	68	16	112
399	0.0001974	10	76	13	142
400	0.0002398	37	80	13	123
401	0.000155	53	78	14	103
402	0.0001646	47	102	13	157
403	0.0001648	54	102	18	150
404	0.0001708	44	95	16	146
405	0.000169	55	114	18	173
406	0.0001607	44	87	14	130
407	0.0001917	76	107	14	138
408	0.0001621	53	88	14	123
409	0.0001816	29	84	16	139
410	0.0001614	58	109	18	160
411	0.0001933	73	103	19	133
412	0.0002103	46	105	19	164
413	0.0001643	87	118	16	149
414	0.0001801	38	97	12	156
415	0.00019	57	94	16	131
416	0.0001973	57	90	16	123
417	0.0001581	55	95	14	135
418	0.0001679	79	105	17	131
419	0.000159	83	116	18	149
420	0.0002025	72	103	14	134
421	0.0001715	17	60	14	103
422	0.000251	134	154	16	174
423	0.000192	48	84	17	120
424	0.0001547	100	131	19	162
425	0.0001659	92	125	14	158
426	0.000163	74	116	18	158
427	0.0001928	71	107	16	143
428	0.0001714	29	85	11	141
429	0.0001564	87	108	19	129
430	0.0001728	45	79	10	113
431	0.0002061	58	105	18	152
432	0.0002209	52	96	18	140
433	0.000185	53	118	17	183
434	0.0001588	48	82	17	116
435	0.0001628	68	110	14	152
436	0.0001689	4	70	13	136
437	0.0001777	34	77	13	120
438	0.0001595	111	142	14	173
439	0.0001638	7	64	17	121
440	0.0001597	129	147	19	165
441	0.0001733	28	66	15	104
442	0.0001755	42	95	14	148
443	0.0001957	32	73	13	114
444	0.0001744	5	66	12	127
445	0.0001743	42	85	18	128
446	0.0001739	11	61	11	111
447	0.0001979	66	109	13	152
448	0.0001566	75	102	13	129
449	0.0001612	121	137	19	153
450	0.0001676	8	67	15	126
451	0.0001697	7	55	11	103
452	0.0001672	60	91	18	122
453	0.0001644	66	87	17	108
454	0.000152	128	149	16	170
455	0.0002127	69	103	19	137
456	0.0002552	90	121	17	152
457	0.0001805	66	115	19	164
458	0.0001583	68	96	15	124
459	0.0001607	33	72	13	111
460	0.0001636	51	104	19	157
461	0.0001665	105	117	17	129
462	0.0001826	30	70	10	110
463	0.0001895	64	103	14	142
464	0.0001656	53	92	15	131
465	0.0001631	31	91	18	151
466	0.0001587	63	92	14	121
467	0.0001541	65	101	17	137
468	0.000175	84	110	17	136
469	0.0001711	83	126	14	169
470	0.0001849	63	99	11	135
471	0.0001554	71	105	17	139
472	0.0001706	39	73	11	107
473	0.0001566	74	114	19	154
474	0.0001781	41	97	12	153
475	0.0001763	20	72	16	124
476	0.0001736	26	73	12	120
477	0.0001665	36	80	15	124
478	0.0001836	39	77	10	115
479	0.0001617	102	137	16	172
480	0.0001537	75	107	18	139
481	0.0001869	4	70	19	136
482	0.0001927	11	82	16	153
483	0.0001752	43	88	17	133
484	0.0001726	79	114	19	149
485	0.0001511	64	95	18	126
486	0.0001797	10	69	14	128
487	0.0001518	101	118	17	135
488	0.0001613	69	114	18	159
489	0.0001932	41	96	14	151
490	0.0001672	83	120	14	157
491	0.00019	7	72	13	137
492	0.0002426	48	84	18	120
493	0.000154	36	86	13	136
494	0.0001692	68	106	16	144
495	0.0001741	56	103	16	150
496	0.0001681	72	98	18	124
497	0.0001723	60	81	13	102
498	0.0001684	79	109	14	139
499	0.0001692	92	113	15	134
500	0.0001876	43	96	15	149
501	0.0001548	65	97	17	129
502	0.0001555	62	97	16	132
503	0.0001652	44	92	14	140
504	0.0001875	3	57	12	111
505	0.0002106	35	95	19	155
506	0.0002145	6	86	16	166
507	0.0001763	32	79	16	126
508	0.0001774	30	87	14	144
509	0.0001636	53	91	17	129
510	0.0001796	95	132	18	169
511	0.0001785	37	75	12	113
512	0.0001885	2	80	16	158
513	0.000151	108	135	18	162
514	0.0001721	36	80	15	124
515	0.0001795	100	129	15	158
516	0.0002084	12	51	7	90
517	0.0001747	35	93	13	151
518	0.0002044	39	96	19	153
519	0.0001695	79	109	16	139
520	0.0001632	22	81	13	140
521	0.000162	80	114	18	148
522	0.0001861	25	73	12	121
523	0.0001654	117	152	18	187
524	0.0001729	89	133	19	177
525	0.0001696	38	89	16	140
526	0.0001719	110	129	19	148
527	0.0001485	110	128	18	146
528	0.000183	83	109	15	135
529	0.0001609	43	79	14	115
530	0.0001663	80	118	17	156
531	0.0001609	71	110	16	149
532	0.0001775	113	146	19	179
533	0.0001628	44	91	17	138
534	0.000199	137	165	19	193
535	0.0001884	72	111	18	150
536	0.000224	96	125	19	154
537	0.0001807	80	114	17	148
538	0.0002519	13	68	15	123
539	0.0001581	101	127	19	153
540	0.0002241	8	68	12	128
541	0.0001562	87	124	17	161
542	0.0001735	68	108	19	148
543	0.0001613	83	122	19	161
544	0.0002033	58	98	19	138
545	0.0001708	91	118	16	145
546	0.0001728	88	124	16	160
547	0.000175	126	152	18	178
548	0.0001845	31	75	12	119
549	0.0001711	13	75	10	137
550	0.0001688	41	96	17	151
551	0.0001632	37	85	15	133
552	0.0001643	102	140	18	178
553	0.0001777	40	85	18	130
554	0.0001646	37	84	17	131
555	0.0001649	39	89	16	139
556	0.0001899	1	63	11	125
557	0.000153	122	145	19	168
558	0.0001698	96	126	19	156
559	0.0001586	99	127	17	155
560	0.0001765	45	89	11	133
561	0.0001876	44	94	15	144
562	0.0002188	64	106	18	148
563	0.0001761	49	106	18	163
564	0.0001944	68	110	16	152
565	0.0001782	5	59	18	113
566	0.0001739	53	97	15	141
567	0.0001749	61	102	15	143
568	0.0001599	46	95	14	144
569	0.0001845	110	134	13	158
570	0.0001834	6	66	14	126
571	0.0001535	51	85	17	119
572	0.0001588	70	103	17	136
573	0.0001622	42	84	18	126
574	0.000179	128	161	18	194
575	0.0001695	72	103	15	134
576	0.0002138	54	94	17	134
577	0.0002311	39	101	18	163
578	0.0001724	142	163	18	184
579	0.0001689	60	99	16	138
580	0.000168	54	95	12	136
581	0.0001827	53	107	19	161
582	0.0001706	23	63	17	103
583	0.0001705	87	120	15	153
584	0.0001591	87	112	19	137
585	0.000175	36	86	15	136
586	0.0001729	35	79	14	123
587	0.0001928	25	80	16	135
588	0.0001845	35	80	14	125
589	0.0001493	123	141	16	159
590	0.0001695	49	96	19	143
591	0.0001584	52	95	16	138
592	0.0001717	73	111	19	149
593	0.0001923	59	107	15	155
594	0.0001643	84	116	19	148
595	0.0001564	96	122	18	148
596	0.0001896	134	159	16	184
597	0.0001672	18	55	13	92
598	0.0001656	37	87	16	137
599	0.0001845	7	65	10	123
600	0.0001849	75	108	15	141
601	0.000183	82	117	17	152
602	0.0001749	8	70	19	132
603	0.0001696	72	111	19	150
604	0.0001905	24	78	19	132
605	0.0001799	56	107	15	158
606	0.0001638	72	113	13	154
607	0.0001596	72	112	19	152
608	0.0001993	39	95	13	151
609	0.0001573	128	152	19	176
610	0.0001785	52	102	14	152
611	0.0001967	108	134	17	160
612	0.0002148	21	79	12	137
613	0.0001707	31	88	18	145
614	0.0001724	24	74	15	124
615	0.0001735	31	69	16	107
616	0.0001586	65	94	11	123
617	0.0001678	137	161	17	185
618	0.0001749	65	104	13	143
619	0.0001721	42	87	17	132
620	0.0001678	74	109	14	144
621	0.0002036	11	68	10	125
622	0.0002003	27	79	16	131
623	0.0001779	88	118	19	148
624	0.0001644	12	68	10	124
625	0.0001752	36	79	19	122
626	0.0001616	69	113	17	157
627	0.0001757	11	70	18	129
628	0.0001716	43	82	9	121
629	0.000208	60	96	15	132
630	0.0001668	122	141	19	160
631	0.0001855	41	80	14	119
632	0.0001807	24	84	19	144
633	0.0001608	83	114	16	145
634	0.0001775	11	68	11	125
635	0.0001574	107	142	18	177
636	0.000183	59	92	15	125
637	0.0001724	60	102	19	144
638	0.0001934	29	72	13	115
639	0.0001632	67	106	19	145
640	0.0001551	88	114	17	140
641	0.0001546	62	91	11	120
642	0.0001787	79	122	18	165
643	0.0001775	3	62	14	121
644	0.0001666	8	62	12	116
645	0.0001687	60	100	18	140
646	0.0001936	42	76	18	110
647	0.000173	63	95	15	127
648	0.0001702	26	83	15	140
649	0.0001592	107	134	19	161
650	0.0001649	42	86	18	130
651	0.0001746	24	70	12	116
652	0.0001806	75	118	15	161
653	0.0001729	15	78	14	141
654	0.000168	24	91	16	158
655	0.000173	56	105	18	154
656	0.0002003	92	124	19	156
657	0.0001859	60	91	16	122
658	0.0001787	50	97	11	144
659	0.0001872	34	83	12	132
660	0.0001708	36	72	13	108
661	0.0001697	138	154	19	170
662	0.0001648	79	105	16	131
663	0.0001702	15	73	12	131
664	0.0002396	55	92	16	129
665	0.0001859	104	135	18	166
666	0.0001811	33	69	12	105
667	0.0001744	87	127	17	167
668	0.0001809	53	87	19	121
669	0.0001696	63	95	17	127
670	0.0002013	15	89	12	163
671	0.0001913	2	61	9	120
672	0.000172	89	122	16	155
673	0.0001629	136	151	17	166
674	0.000164	125	150	19	175
675	0.0001603	86	113	16	140
676	0.0001779	23	91	11	159
677	0.0001571	102	127	18	152
678	0.0001752	84	127	17	170
679	0.0001871	92	121	17	150
680	0.0001914	87	123	15	159
681	0.000155	79	100	19	121
682	0.0001678	62	110	12	158
683	0.0001779	26	91	13	156
684	0.0002048	53	87	14	121
685	0.0002093	147	163	19	179
686	0.000194	61	100	14	139
687	0.0001753	59	105	16	151
688	0.0001744	48	87	16	126
689	0.0001796	86	121	16	156
690	0.0001752	47	83	14	119
691	0.0001625	22	72	13	122
692	0.0001819	39	85	15	131
693	0.0001746	3	59	16	115
694	0.0001879	54	102	19	150
695	0.0001906	80	127	16	174
696	0.0001699	90	112	14	134
697	0.0001836	45	84	16	123
698	0.0001801	35	80	13	125
699	0.0001641	67	94	14	121
700	0.0001859	24	74	18	124
701	0.0001814	63	100	16	137
702	0.0001786	105	130	18	155
703	0.0001611	102	123	18	144
704	0.0001638	81	116	17	151
705	0.000163	76	116	15	156
706	0.0001662	58	94	16	130
707	0.0001973	85	117	17	149
708	0.0001717	128	149	18	170
709	0.0001786	70	101	15	132
710	0.0001623	71	113	14	155
711	0.0001677	64	109	18	154
712	0.0002334	91	122	16	153
713	0.0002312	46	88	16	130
714	0.0001747	5	67	14	129
715	0.0002274	150	176	19	202
716	0.0002051	58	96	17	134
717	0.000166	102	128	15	154
718	0.0001621	31	67	15	103
719	0.0001956	0	55	12	110
720	0.0001654	97	126	17	155
721	0.000179	75	125	18	175
722	0.0001556	99	125	19	151
723	0.0001655	93	128	18	163
724	0.000189	24	78	11	132
725	0.0001617	107	121	18	135
726	0.0001763	62	100	17	138
727	0.0002657	28	91	15	154
728	0.0001688	58	92	10	126
729	0.0001674	75	110	19	145
730	0.0001558	97	130	19	163
731	0.0001686	85	114	14	143
732	0.0001646	59	95	19	131
733	0.0001702	97	117	19	137
734	0.0001694	57	94	18	131
735	0.0001599	35	75	8	115
736	0.0001811	60	101	17	142
737	0.0001811	3	69	13	135
738	0.0001611	42	91	11	140
739	0.0001726	65	107	18	149
740	0.0001682	89	106	19	123
741	0.0001791	39	85	16	131
742	0.0001656	36	89	18	142
743	0.0001728	80	118	19	156
744	0.0001835	14	67	12	120
745	0.000161	87	112	17	137
746	0.0001727	84	116	15	148
747	0.0001648	51	100	14	149
748	0.0001806	38	97	15	156
749	0.0001793	69	114	19	159
750	0.0001824	25	83	12	141
751	0.0001948	35	86	17	137
752	0.0002162	47	87	18	127
753	0.0001808	73	100	16	127
754	0.0001773	51	89	19	127
755	0.000177	119	147	19	175
756	0.0001799	40	85	15	130
757	0.000171	93	122	17	151
758	0.0001584	71	97	17	123
759	0.000198	26	80	19	134
760	0.0001515	85	112	17	139
761	0.0001558	76	116	17	156
762	0.000182	140	159	17	178
763	0.0002169	78	111	15	144
764	0.0001772	98	129	17	160
765	0.0001757	132	153	19	174
766	0.0001942	39	86	14	133
767	0.000184	24	74	14	124
768	0.0001914	22	86	13	150
769	0.0002211	32	93	16	154
770	0.0002041	61	85	12	109
771	0.0001724	60	104	15	148
772	0.0001922	70	111	15	152
773	0.0001571	85	118	19	151
774	0.0001743	53	103	17	153
775	0.0002367	99	122	15	145
776	0.0001752	89	119	17	149
777	0.0001805	78	116	19	154
778	0.0001879	49	87	12	125
779	0.0001733	28	86	9	144
780	0.0001606	136	161	19	186
781	0.0001844	94	134	19	174
782	0.0001779	92	120	16	148
783	0.0001655	81	115	11	149
784	0.0001826	40	90	13	140
785	0.0001894	115	140	18	165
786	0.0001684	49	91	15	133
787	0.0001526	74	91	15	108
788	0.0001879	62	109	15	156
789	0.0001583	108	131	19	154
790	0.0001909	30	81	19	132
791	0.0001706	23	73	13	123
792	0.0001864	56	105	14	154
793	0.0002153	121	149	16	177
794	0.000185	35	91	11	147
795	0.0001661	36	91	17	146
796	0.0001755	116	139	19	162
797	0.0001762	3	63	18	123
798	0.0002018	21	72	9	123
799	0.0001767	60	100	19	140
800	0.0001662	52	95	18	138
801	0.0001712	75	104	17	133
802	0.0001687	110	138	18	166
803	0.000207	109	132	19	155
804	0.0002053	107	133	18	159
805	0.0001837	113	148	19	183
806	0.0001616	108	143	18	178
807	0.0001745	48	94	16	140
808	0.0002076	17	67	9	117
809	0.0001736	4	58	11	112
810	0.00017	7	63	18	119
811	0.0001662	22	75	15	128
812	0.000156	85	117	13	149
813	0.0001663	19	70	9	121
814	0.0001622	27	92	16	157
815	0.0001815	84	118	16	152
816	0.0001694	86	113	14	140
817	0.0001866	13	77	15	141
818	0.0001631	78	115	18	152
819	0.0001855	14	60	15	106
820	0.0001854	30	73	15	116
821	0.000169	57	104	19	151
822	0.0002936	101	123	13	145
823	0.0001553	44	86	15	128
824	0.0001577	80	108	14	136
825	0.0001732	79	119	16	159
826	0.0001606	66	102	14	138
827	0.0001603	48	91	19	134
828	0.0001667	8	68	11	128
829	0.0001754	45	92	14	139
830	0.0001625	23	74	14	125
831	0.0002026	6	75	12	144
832	0.0001768	4	73	18	142
833	0.0001575	100	131	17	162
834	0.0001629	31	81	17	131
835	0.0001651	125	147	18	169
836	0.0001579	64	99	15	134
837	0.0001792	14	80	14	146
838	0.0002035	108	130	16	152
839	0.0001653	164	179	19	194
840	0.0001822	32	87	12	142
841	0.0001739	111	137	19	163
842	0.0001636	85	119	19	153
843	0.000158	76	106	15	136
844	0.0001642	48	101	19	154
845	0.000176	65	102	17	139
846	0.0001601	79	115	18	151
847	0.0001754	119	155	18	191
848	0.0001627	64	105	12	146
849	0.0001565	112	133	19	154
850	0.0001779	45	100	18	155
851	0.0001636	52	87	16	122
852	0.0001581	62	106	15	150
853	0.0001929	25	73	17	121
854	0.0001725	112	142	17	172
855	0.0002141	74	107	18	140
856	0.0001662	36	94	18	152
857	0.00018	83	111	17	139
858	0.0001697	110	130	16	150
859	0.0001803	54	93	14	132
860	0.0001677	28	88	13	148
861	0.0002059	76	122	18	168
862	0.0001782	137	157	18	177
863	0.0001643	45	94	16	143
864	0.0002163	88	120	17	152
865	0.0001585	178	192	19	206
866	0.0002086	16	74	17	132
867	0.0001729	7	61	18	115
868	0.0001833	70	107	15	144
869	0.0003378	84	124	16	164
870	0.000197	6	68	19	130
871	0.000212	87	113	17	139
872	0.0001683	45	90	12	135
873	0.0002446	11	77	10	143
874	0.0002281	34	92	13	150
875	0.0001654	123	139	19	155
876	0.0001796	31	72	13	113
877	0.0001624	62	103	16	144
878	0.0001849	2	66	10	130
879	0.0002268	55	101	16	147
880	0.0001661	93	121	18	149
881	0.0001789	37	87	11	137
882	0.0001518	66	96	17	126
883	0.0001552	107	125	18	143
884	0.0001582	57	93	12	129
885	0.0001917	21	84	17	147
886	0.0001721	81	105	17	129
887	0.0001783	41	92	17	143
888	0.0001499	124	139	18	154
889	0.0001737	34	95	19	156
890	0.0002028	51	97	17	143
891	0.0002268	59	89	14	119
892	0.0001621	56	88	16	120
893	0.0001651	67	107	17	147
894	0.0001651	42	86	16	130
895	0.0001719	43	95	17	147
896	0.0001769	104	133	19	162
897	0.0001793	41	76	15	111
898	0.0001619	111	140	19	169
899	0.000168	46	95	16	144
900	0.0001649	49	87	17	125
901	0.0001645	99	122	16	145
902	0.0001832	13	77	17	141
903	0.0001778	5	74	13	143
904	0.0001511	82	107	18	132
905	0.0001698	13	67	14	121
906	0.000168	61	102	12	143
907	0.0001639	63	100	14	137
908	0.0001708	64	112	19	160
909	0.0002062	54	98	19	142
910	0.0001753	100	129	18	158
911	0.0002022	90	103	19	116
912	0.000159	63	101	16	139
913	0.0001898	14	71	16	128
914	0.0001711	3	56	13	109
915	0.0001655	106	134	14	162
916	0.0002252	7	81	16	155
917	0.0001683	70	117	19	164
918	0.0001707	55	96	17	137
919	0.0001902	113	154	18	195
920	0.0001541	90	124	19	158
921	0.0002142	14	75	10	136
922	0.0001754	35	86	15	137
923	0.0001664	7	61	9	115
924	0.0002456	42	81	19	120
925	0.0001601	81	116	15	151
926	0.0001832	56	106	17	156
927	0.0001722	8	83	12	158
928	0.0001716	85	120	13	155
929	0.0002155	2	65	13	128
930	0.000164	14	67	10	120
931	0.0001886	40	92	16	144
932	0.0001849	97	131	18	165
933	0.0001605	14	72	12	130
934	0.000176	58	104	19	150
935	0.0001796	87	117	17	147
936	0.0001618	47	98	17	149
937	0.0001807	47	95	17	143
938	0.0001677	59	105	15	151
939	0.0002049	96	127	19	158
940	0.0001714	12	78	17	144
941	0.0001792	51	92	13	133
942	0.0001834	76	126	17	176
943	0.0002033	7	79	18	151
944	0.000158	68	112	19	156
945	0.0001937	25	83	14	141
946	0.0003352	37	104	15	171
947	0.0001686	63	109	19	155
948	0.0002078	75	111	14	147
949	0.0001646	57	92	10	127
950	0.0001738	82	116	14	150
951	0.0001825	82	116	15	150
952	0.0001854	125	158	18	191
953	0.0002215	93	134	16	175
954	0.0001851	61	97	17	133
955	0.0001761	11	74	11	137
956	0.0001591	71	109	17	147
957	0.0001731	116	148	18	180
958	0.0001569	92	122	17	152
959	0.0001585	38	80	13	122
960	0.0001912	26	85	16	144
961	0.0001711	85	122	15	159
962	0.0001889	54	98	13	142
963	0.0001798	54	96	13	138
964	0.0002168	35	92	14	149
965	0.0001992	70	119	19	168
966	0.0001604	103	147	19	191
967	0.0001755	57	101	18	145
968	0.0001579	19	70	9	121
969	0.0001896	6	65	18	124
970	0.0001575	68	106	17	144
971	0.0001726	55	90	12	125
972	0.0002018	114	141	17	168
973	0.0001583	80	111	18	142
974	0.0001961	64	105	17	146
975	0.0001726	28	80	11	132
976	0.0001766	57	100	19	143
977	0.0001669	76	110	18	144
978	0.0001605	102	124	19	146
979	0.0001868	5	57	13	109
980	0.0001596	41	89	11	137
981	0.0001641	61	116	19	171
982	0.000167	70	99	15	128
983	0.0001791	33	78	10	123
984	0.0002177	27	83	15	139
985	0.0001815	7	77	17	147
986	0.0001964	3	71	19	139
987	0.0002193	44	88	10	132
988	0.0001606	55	95	18	135
989	0.0001831	35	79	16	123
990	0.0001564	115	143	18	171
991	0.0002009	26	83	18	140
992	0.0001557	45	82	13	119
993	0.0001628	37	85	19	133
994	0.0002295	4	71	15	138
995	0.0001723	27	96	15	165
996	0.0001776	113	146	18	179
997	0.0001816	90	117	18	144
998	0.0001556	85	122	15	159
999	0.0001667	64	112	19	160
mean	0.000176745	60.66	101.589	15.838	142.518

## Sheet: GS_FemaleOpt
	time	SEq	Bal	Reg	Egal
0	0.0001586	38	81	13	124
1	0.0001566	48	90	14	132
2	0.000156	103	133	19	163
3	0.000203	9	74	11	139
4	0.0001517	72	106	18	140
5	0.0001607	8	70	17	132
6	0.0001489	97	130	19	163
7	0.0001694	19	75	11	131
8	0.00016	20	77	15	134
9	0.0001516	44	87	13	130
10	0.0001642	39	99	16	159
11	0.000166	11	79	12	147
12	0.000172	99	133	14	167
13	0.0001536	37	79	14	121
14	0.0001757	58	91	16	124
15	0.0001529	87	113	19	139
16	0.0001775	32	91	13	150
17	0.0001602	45	86	14	127
18	0.0001683	5	73	17	141
19	0.0001625	41	86	17	131
20	0.0001781	92	125	15	158
21	0.0001598	34	79	9	124
22	0.0001695	35	90	15	145
23	0.0001505	75	112	18	149
24	0.0001728	10	79	11	148
25	0.0001607	82	122	18	162
26	0.0001953	83	109	18	135
27	0.0001535	78	111	19	144
28	0.0001548	73	100	15	127
29	0.0001696	9	67	10	125
30	0.0001719	10	70	16	130
31	0.0001584	12	65	14	118
32	0.0001503	76	109	11	142
33	0.0001544	60	101	19	142
34	0.0001553	44	86	13	128
35	0.0001662	103	129	15	155
36	0.0001729	76	112	19	148
37	0.0001589	59	100	15	141
38	0.0001553	36	82	19	128
39	0.000166	63	106	13	149
40	0.0001665	71	107	11	143
41	0.0001495	125	150	19	175
42	0.0001534	132	149	18	166
43	0.0001672	51	86	15	121
44	0.0001603	67	103	17	139
45	0.0001618	45	94	13	143
46	0.0001464	76	99	13	122
47	0.0001758	127	154	19	181
48	0.0001632	117	141	18	165
49	0.0001593	32	79	13	126
50	0.0001534	73	113	13	153
51	0.0001668	138	149	15	160
52	0.0001654	41	76	11	111
53	0.0001513	87	113	17	139
54	0.0001502	125	139	16	153
55	0.0001708	18	73	15	128
56	0.0002226	2	78	12	154
57	0.0001495	63	98	19	133
58	0.0001527	55	92	15	129
59	0.0001799	70	121	17	172
60	0.0001665	43	104	19	165
61	0.0001555	30	78	12	126
62	0.0001557	79	119	16	159
63	0.0001665	65	96	19	127
64	0.0001613	102	139	19	176
65	0.0001577	18	69	9	120
66	0.0001609	50	87	16	124
67	0.0001716	170	188	19	206
68	0.0001658	77	118	16	159
69	0.0001575	53	98	15	143
70	0.0002091	21	74	16	127
71	0.0001614	152	160	19	168
72	0.00015	136	158	18	180
73	0.0001552	42	84	14	126
74	0.0001584	47	83	17	119
75	0.0002009	47	101	19	155
76	0.0001516	100	125	18	150
77	0.000195	45	83	10	121
78	0.0001513	112	135	15	158
79	0.0001719	23	83	16	143
80	0.0001566	28	75	13	122
81	0.000152	126	157	19	188
82	0.0001564	95	133	17	171
83	0.0001695	28	92	15	156
84	0.0001586	55	82	17	109
85	0.0001633	37	84	12	131
86	0.0001691	25	72	10	119
87	0.0001872	4	76	18	148
88	0.000148	99	137	15	175
89	0.00016	84	120	16	156
90	0.0001716	20	70	15	120
91	0.0001556	66	101	16	136
92	0.000155	44	80	14	116
93	0.0001665	6	51	12	96
94	0.0001587	184	194	19	204
95	0.0001592	48	97	17	146
96	0.0001584	51	85	16	119
97	0.0001503	51	80	15	109
98	0.0001518	139	157	19	175
99	0.0001657	17	74	11	131
100	0.0001617	57	92	15	127
101	0.0001684	68	119	19	170
102	0.0001517	80	105	19	130
103	0.0001656	8	75	13	142
104	0.0001542	92	131	19	170
105	0.0001546	65	109	16	153
106	0.0001594	2	55	12	108
107	0.0001524	109	136	19	163
108	0.0001639	111	134	18	157
109	0.0001498	85	113	15	141
110	0.0001598	14	71	11	128
111	0.0002667	78	115	17	152
112	0.0001501	81	110	15	139
113	0.0001653	8	69	12	130
114	0.0001868	18	74	12	130
115	0.0001712	45	94	17	143
116	0.0001573	82	114	17	146
117	0.0001519	114	147	17	180
118	0.0001546	85	121	19	157
119	0.0001524	103	130	17	157
120	0.0001587	28	83	14	138
121	0.0001974	47	92	19	137
122	0.0001825	86	117	17	148
123	0.0001741	32	83	17	134
124	0.000155	51	84	10	117
125	0.0001675	43	85	15	127
126	0.0001559	58	93	18	128
127	0.0001541	65	102	12	139
128	0.0001528	64	96	13	128
129	0.0001509	100	132	16	164
130	0.0001546	33	76	13	119
131	0.0001687	23	68	10	113
132	0.0001524	64	102	18	140
133	0.0002064	5	73	13	141
134	0.0001499	75	97	17	119
135	0.0001573	113	133	16	153
136	0.0001556	41	77	18	113
137	0.0001546	165	178	19	191
138	0.0001548	42	77	16	112
139	0.000167	28	84	18	140
140	0.0001608	7	65	11	123
141	0.0001805	39	100	18	161
142	0.0001597	23	82	11	141
143	0.0001535	55	97	14	139
144	0.0001601	44	96	14	148
145	0.000153	128	143	17	158
146	0.0001668	169	187	18	205
147	0.0001536	55	85	13	115
148	0.0001492	50	85	13	120
149	0.0001495	53	95	18	137
150	0.0001598	70	105	18	140
151	0.0001691	62	96	17	130
152	0.0001597	61	108	19	155
153	0.0002476	68	110	19	152
154	0.0001497	140	166	19	192
155	0.0001669	91	126	18	161
156	0.0001454	124	145	18	166
157	0.0001498	75	110	17	145
158	0.0001635	39	96	18	153
159	0.000152	106	136	16	166
160	0.0001635	61	104	19	147
161	0.0001654	89	118	15	147
162	0.0001501	175	190	19	205
163	0.0001646	48	91	14	134
164	0.0001554	65	99	18	133
165	0.0001937	47	99	19	151
166	0.0001535	105	135	16	165
167	0.000169	8	52	13	96
168	0.0001658	126	152	17	178
169	0.0001569	81	124	19	167
170	0.0001704	2	72	16	142
171	0.0001502	63	91	17	119
172	0.0001634	32	75	11	118
173	0.0001532	90	125	17	160
174	0.0001928	46	88	11	130
175	0.0001657	21	85	16	149
176	0.000158	59	97	15	135
177	0.0001529	46	88	12	130
178	0.0001509	45	76	13	107
179	0.0001684	3	68	13	133
180	0.0001718	88	115	18	142
181	0.0001474	78	105	15	132
182	0.0001587	89	124	16	159
183	0.0001623	57	88	15	119
184	0.000169	42	73	12	104
185	0.0001724	3	67	12	131
186	0.0001689	11	69	15	127
187	0.0001555	24	79	11	134
188	0.0001468	155	166	18	177
189	0.0001507	116	134	19	152
190	0.0001611	117	141	17	165
191	0.0001558	78	116	19	154
192	0.000157	75	114	19	153
193	0.0001543	96	133	19	170
194	0.0001574	32	77	14	122
195	0.0001484	79	112	19	145
196	0.0001573	71	116	18	161
197	0.000148	96	121	16	146
198	0.0001524	57	97	18	137
199	0.0001528	81	111	18	141
200	0.0001737	21	89	17	157
201	0.0001629	28	78	12	128
202	0.0001654	104	136	19	168
203	0.000158	115	142	19	169
204	0.0001517	104	133	17	162
205	0.0001576	90	115	18	140
206	0.0001515	122	145	19	168
207	0.0001557	23	62	11	101
208	0.0001506	69	102	17	135
209	0.0001675	18	68	13	118
210	0.00016	7	70	16	133
211	0.0001991	79	111	15	143
212	0.0001583	110	134	19	158
213	0.000156	33	86	19	139
214	0.0001711	74	106	18	138
215	0.0001529	100	132	14	164
216	0.0001537	30	59	12	88
217	0.0001622	6	48	8	90
218	0.0001474	108	132	16	156
219	0.0002103	117	158	19	199
220	0.0001554	133	155	17	177
221	0.0001478	129	155	17	181
222	0.000169	53	99	19	145
223	0.0001548	116	140	17	164
224	0.0001644	19	77	12	135
225	0.0001589	27	82	12	137
226	0.0001775	15	69	12	123
227	0.0001573	23	72	18	121
228	0.0001541	36	80	15	124
229	0.0001542	61	103	18	145
230	0.0001635	17	77	13	137
231	0.0001606	46	91	18	136
232	0.0001501	83	113	18	143
233	0.000149	119	135	19	151
234	0.0001541	43	77	14	111
235	0.0001505	95	120	18	145
236	0.00016	24	76	13	128
237	0.0001578	117	141	18	165
238	0.0001581	63	99	18	135
239	0.0001679	5	80	18	155
240	0.0001544	36	71	15	106
241	0.0001597	7	69	12	131
242	0.0001567	83	128	16	173
243	0.0001571	62	103	13	144
244	0.0001463	123	145	19	167
245	0.0001628	50	79	11	108
246	0.0001647	16	72	13	128
247	0.000147	125	144	19	163
248	0.0001497	105	125	19	145
249	0.0001543	73	107	16	141
250	0.0001696	76	112	12	148
251	0.000164	4	66	11	128
252	0.0001636	20	78	17	136
253	0.0001672	173	188	19	203
254	0.0001554	69	97	15	125
255	0.0001588	65	99	12	133
256	0.0001711	35	87	14	139
257	0.0001567	55	100	17	145
258	0.0001558	17	75	14	133
259	0.0001711	5	71	11	137
260	0.0002041	9	88	16	167
261	0.0001545	82	122	19	162
262	0.0001478	103	124	15	145
263	0.0001768	36	84	16	132
264	0.0001525	84	122	19	160
265	0.0001534	73	104	19	135
266	0.0001608	15	64	11	113
267	0.0001732	14	81	16	148
268	0.0001559	59	105	18	151
269	0.0001904	71	109	13	147
270	0.000154	53	88	19	123
271	0.0001587	164	183	19	202
272	0.0001532	85	119	19	153
273	0.0001542	94	125	18	156
274	0.0001613	76	112	19	148
275	0.0001782	54	90	14	126
276	0.0001657	71	103	13	135
277	0.0001942	10	69	12	128
278	0.0001543	98	126	17	154
279	0.0001666	2	76	9	150
280	0.0002012	27	75	11	123
281	0.000151	86	115	18	144
282	0.0001546	59	85	14	111
283	0.0001542	84	106	15	128
284	0.0001803	79	106	13	133
285	0.0001694	45	104	18	163
286	0.0001753	13	66	17	119
287	0.0001759	76	119	17	162
288	0.0001707	73	100	13	127
289	0.0001544	89	118	17	147
290	0.0001628	0	61	16	122
291	0.000147	113	132	14	151
292	0.0001504	80	118	19	156
293	0.0001558	25	70	10	115
294	0.0001567	57	101	17	145
295	0.0001504	105	129	19	153
296	0.0001682	6	77	18	148
297	0.0001689	28	82	17	136
298	0.0001571	24	73	14	122
299	0.0001739	24	86	18	148
300	0.000156	56	92	18	128
301	0.0001657	100	141	17	182
302	0.0001573	7	53	8	99
303	0.0001812	19	71	9	123
304	0.0001597	44	93	15	142
305	0.0001586	44	96	14	148
306	0.0001509	101	128	18	155
307	0.0001494	122	144	19	166
308	0.000155	57	99	16	141
309	0.0001447	133	147	19	161
310	0.0001571	69	106	15	143
311	0.0001827	24	72	9	120
312	0.0001541	71	107	14	143
313	0.0001689	82	109	15	136
314	0.0001638	18	73	15	128
315	0.0001741	106	132	15	158
316	0.0001565	111	148	19	185
317	0.0001583	69	113	18	157
318	0.0001512	110	142	19	174
319	0.0001703	86	110	13	134
320	0.0001513	70	98	16	126
321	0.0001465	120	144	17	168
322	0.0001605	24	84	17	144
323	0.0001515	85	106	17	127
324	0.0001549	54	98	18	142
325	0.0001527	57	99	15	141
326	0.0001633	7	76	10	145
327	0.0001645	69	115	19	161
328	0.0001511	59	91	14	123
329	0.0001749	2	60	16	118
330	0.0003104	71	103	14	135
331	0.0001566	121	145	19	169
332	0.000261	55	97	15	139
333	0.0001582	27	74	11	121
334	0.0001584	14	70	12	126
335	0.0001656	9	80	13	151
336	0.0001607	24	80	15	136
337	0.0001494	91	123	19	155
338	0.0001503	121	148	17	175
339	0.0001496	61	90	12	119
340	0.0001731	57	87	17	117
341	0.0001582	84	118	17	152
342	0.0001671	135	159	19	183
343	0.0001573	66	111	19	156
344	0.0001709	22	83	17	144
345	0.0001613	28	82	16	136
346	0.0001606	73	114	17	155
347	0.0001535	83	120	15	157
348	0.0001564	64	105	17	146
349	0.0001594	44	89	13	134
350	0.0001489	82	113	19	144
351	0.0001829	56	98	16	140
352	0.0001601	14	69	12	124
353	0.000159	36	86	15	136
354	0.0001686	51	92	14	133
355	0.0001548	37	66	12	95
356	0.0001604	42	102	16	162
357	0.0001498	101	124	16	147
358	0.0001534	98	119	16	140
359	0.0001524	63	94	15	125
360	0.0001503	129	147	18	165
361	0.0001678	14	61	12	108
362	0.0001586	113	134	19	155
363	0.0001585	58	96	17	134
364	0.0001734	17	74	17	131
365	0.0001568	67	108	19	149
366	0.0001815	70	107	19	144
367	0.0001514	107	131	19	155
368	0.0001564	42	89	17	136
369	0.0001588	75	111	13	147
370	0.0001763	61	101	14	141
371	0.000155	60	102	14	144
372	0.0001577	51	99	18	147
373	0.000156	60	101	12	142
374	0.00015	113	138	18	163
375	0.0001667	42	95	19	148
376	0.0001589	64	97	13	130
377	0.0001699	15	65	9	115
378	0.0001671	33	90	19	147
379	0.0001781	53	104	16	155
380	0.0001611	14	72	14	130
381	0.0001584	59	97	18	135
382	0.0001546	122	143	17	164
383	0.000192	94	119	17	144
384	0.0001533	66	102	16	138
385	0.0001595	76	124	18	172
386	0.0001616	48	83	10	118
387	0.0001492	62	91	12	120
388	0.0001739	30	74	17	118
389	0.0001584	54	95	17	136
390	0.0001562	50	94	18	138
391	0.0001544	45	80	15	115
392	0.0001642	148	167	19	186
393	0.0001657	53	92	14	131
394	0.0001493	123	147	19	171
395	0.0001552	52	90	16	128
396	0.0002289	43	82	17	121
397	0.0001674	38	70	10	102
398	0.000157	66	103	18	140
399	0.0001575	90	129	15	168
400	0.0001602	39	95	16	151
401	0.0001733	1	50	12	99
402	0.000164	61	106	19	151
403	0.00016	8	68	17	128
404	0.0001659	25	80	12	135
405	0.0001818	16	81	17	146
406	0.0001547	44	84	19	124
407	0.0001612	4	68	16	132
408	0.0001512	77	107	17	137
409	0.0001543	53	92	19	131
410	0.0001648	1	71	18	141
411	0.000176	58	98	16	138
412	0.000169	118	148	17	178
413	0.0001524	69	102	15	135
414	0.0001791	60	103	17	146
415	0.0001578	71	105	18	139
416	0.0001688	27	62	13	97
417	0.0001643	42	95	16	148
418	0.000151	93	119	19	145
419	0.0001739	79	122	19	165
420	0.0001633	108	139	19	170
421	0.0001675	29	84	18	139
422	0.0001604	90	133	17	176
423	0.0001596	45	84	15	123
424	0.0001537	101	129	19	157
425	0.0002149	37	85	12	133
426	0.0001842	24	97	18	170
427	0.0001915	58	96	16	134
428	0.0001649	123	157	16	191
429	0.0001549	84	117	19	150
430	0.0001709	79	107	19	135
431	0.0001528	82	112	17	142
432	0.0001551	94	124	19	154
433	0.0001662	46	119	14	192
434	0.0001726	68	96	17	124
435	0.0001634	76	112	15	148
436	0.0001534	67	104	19	141
437	0.0001577	42	83	11	124
438	0.0001645	98	120	18	142
439	0.0001591	41	85	18	129
440	0.0001653	61	108	15	155
441	0.0001812	48	86	18	124
442	0.0001647	99	140	19	181
443	0.0001636	36	79	16	122
444	0.0001545	61	102	16	143
445	0.0001524	56	94	18	132
446	0.0001539	50	85	14	120
447	0.0001904	133	158	18	183
448	0.0001689	7	67	13	127
449	0.0001516	128	165	19	202
450	0.0001662	72	103	18	134
451	0.0001613	42	84	14	126
452	0.0001547	74	108	13	142
453	0.0001536	14	58	14	102
454	0.0001481	116	142	15	168
455	0.0001532	69	106	14	143
456	0.0001591	22	75	13	128
457	0.0001608	136	162	18	188
458	0.0001504	76	102	14	128
459	0.0001744	17	65	9	113
460	0.0001628	82	121	18	160
461	0.0001548	58	95	17	132
462	0.0001622	53	86	15	119
463	0.0001474	95	129	19	163
464	0.0001565	51	92	12	133
465	0.0002902	86	125	17	164
466	0.0001611	2	56	9	110
467	0.0001522	63	92	17	121
468	0.0001471	124	146	19	168
469	0.0001613	13	80	15	147
470	0.0001543	120	149	19	178
471	0.0001568	135	154	19	173
472	0.0001672	2	57	10	112
473	0.0001642	29	87	15	145
474	0.0001664	12	78	13	144
475	0.0001558	16	61	17	106
476	0.0001587	6	68	16	130
477	0.0001525	80	110	18	140
478	0.0001571	95	118	17	141
479	0.0001492	146	160	16	174
480	0.0001563	65	96	19	127
481	0.0001534	65	99	15	133
482	0.0001828	30	85	15	140
483	0.0001581	43	88	17	133
484	0.0001599	77	98	14	119
485	0.0001479	86	113	13	140
486	0.0001487	69	101	15	133
487	0.0001642	20	69	12	118
488	0.0001479	103	124	18	145
489	0.0001565	40	86	14	132
490	0.0001581	35	88	19	141
491	0.0001649	69	104	18	139
492	0.0001736	48	84	18	120
493	0.0001821	101	129	19	157
494	0.0001528	64	103	12	142
495	0.0001484	121	149	18	177
496	0.0001981	25	70	14	115
497	0.00015	59	81	16	103
498	0.000152	53	94	14	135
499	0.000158	22	74	17	126
500	0.0001622	60	105	15	150
501	0.000152	90	122	18	154
502	0.0001473	133	145	18	157
503	0.0001506	85	112	17	139
504	0.0001564	97	117	17	137
505	0.0001515	82	115	14	148
506	0.0001935	52	115	18	178
507	0.0001719	32	79	16	126
508	0.0001656	43	91	17	139
509	0.0001489	72	100	17	128
510	0.0001576	39	93	13	147
511	0.000155	44	84	14	124
512	0.0001707	11	85	19	159
513	0.0001572	41	89	13	137
514	0.0001546	35	76	16	117
515	0.0001545	78	115	18	152
516	0.000154	34	69	8	104
517	0.0002231	147	175	19	203
518	0.0001734	39	96	19	153
519	0.0001635	54	92	12	130
520	0.0001551	81	114	17	147
521	0.0001671	52	98	16	144
522	0.0001533	53	96	12	139
523	0.0001712	63	94	9	125
524	0.0001531	93	124	16	155
525	0.0001546	95	130	17	165
526	0.0001594	10	68	17	126
527	0.0001584	10	73	13	136
528	0.0001512	103	135	19	167
529	0.0001564	58	101	19	144
530	0.0001652	55	102	19	149
531	0.0001486	110	143	15	176
532	0.0001782	43	90	17	137
533	0.0001528	61	91	14	121
534	0.0001723	45	96	14	147
535	0.0001751	2	75	13	148
536	0.000153	97	128	18	159
537	0.0001928	75	114	17	153
538	0.0001908	25	77	19	129
539	0.0001814	44	99	17	154
540	0.0001484	74	101	17	128
541	0.0001613	33	77	12	121
542	0.0001532	82	118	17	154
543	0.0001434	115	128	18	141
544	0.0001908	48	93	19	138
545	0.0001578	12	76	19	140
546	0.0001806	20	73	11	126
547	0.000176	11	70	9	129
548	0.000158	94	120	16	146
549	0.0002041	73	101	18	129
550	0.0001618	29	88	11	147
551	0.0001552	54	88	14	122
552	0.0001546	67	113	18	159
553	0.0001519	110	136	18	162
554	0.0001604	21	77	9	133
555	0.0001616	66	116	15	166
556	0.0001587	9	65	11	121
557	0.0001638	93	124	16	155
558	0.000156	24	75	15	126
559	0.000196	70	99	15	128
560	0.0001659	80	113	15	146
561	0.0001576	55	93	19	131
562	0.0001547	64	106	18	148
563	0.0001602	63	109	19	155
564	0.000163	49	89	16	129
565	0.00016	95	125	18	155
566	0.0001643	12	82	13	152
567	0.0001572	55	95	11	135
568	0.0002057	101	135	17	169
569	0.0001503	56	93	17	130
570	0.0001625	52	99	14	146
571	0.0001708	54	88	18	122
572	0.0001806	41	96	17	151
573	0.0001586	21	74	14	127
574	0.0001697	82	130	15	178
575	0.0001596	147	169	19	191
576	0.0001556	42	84	11	126
577	0.0001654	76	122	19	168
578	0.0001532	32	82	13	132
579	0.0001789	40	88	19	136
580	0.000185	11	80	16	149
581	0.0001942	70	109	17	148
582	0.0001549	56	90	19	124
583	0.0001618	2	69	13	136
584	0.0001586	108	133	19	158
585	0.0001538	67	108	18	149
586	0.0001584	58	99	17	140
587	0.0001647	45	94	12	143
588	0.0001573	31	78	15	125
589	0.0001639	34	93	11	152
590	0.0001668	2	79	19	156
591	0.0001611	9	67	16	125
592	0.0001505	152	172	19	192
593	0.00015	99	126	16	153
594	0.0001518	54	94	13	134
595	0.0001705	20	76	14	132
596	0.0001633	25	86	15	147
597	0.0001726	66	92	16	118
598	0.0001621	32	84	16	136
599	0.0001669	61	102	19	143
600	0.0001655	61	95	16	129
601	0.0001543	68	106	15	144
602	0.0001876	8	70	19	132
603	0.0001524	91	130	16	169
604	0.0001574	45	84	15	123
605	0.0001599	25	93	17	161
606	0.0001765	67	103	15	139
607	0.000163	1	57	10	113
608	0.0001669	73	104	15	135
609	0.0001556	95	127	16	159
610	0.0001522	96	124	14	152
611	0.0001552	72	107	13	142
612	0.0001778	47	97	19	147
613	0.0001543	121	147	16	173
614	0.0002448	24	74	15	124
615	0.0001691	4	51	11	98
616	0.0001803	65	94	11	123
617	0.0001554	130	164	18	198
618	0.0001652	12	78	17	144
619	0.0001528	83	107	16	131
620	0.0001517	167	181	19	195
621	0.0001567	98	131	17	164
622	0.000153	74	105	16	136
623	0.000161	82	124	19	166
624	0.0002006	12	68	10	124
625	0.0001576	47	82	12	117
626	0.0001659	71	111	14	151
627	0.0001671	3	66	18	129
628	0.0001921	27	88	15	149
629	0.000183	15	68	12	121
630	0.0001555	89	118	19	147
631	0.0001737	114	130	19	146
632	0.000162	12	73	13	134
633	0.0001734	63	105	15	147
634	0.0001512	69	102	11	135
635	0.0001546	77	110	18	143
636	0.0001516	90	119	15	148
637	0.0001532	115	135	17	155
638	0.0001709	37	82	19	127
639	0.0001787	0	73	17	146
640	0.0001605	30	63	9	96
641	0.000152	66	95	15	124
642	0.0001534	107	134	19	161
643	0.0001524	19	68	14	117
644	0.0001836	29	76	14	123
645	0.0001566	40	80	12	120
646	0.0001581	56	91	18	126
647	0.0001548	96	122	15	148
648	0.0001583	42	93	17	144
649	0.0001554	112	140	18	168
650	0.0002051	35	75	13	115
651	0.0001499	81	104	19	127
652	0.0001585	139	163	19	187
653	0.0001661	51	101	14	151
654	0.0001667	62	106	14	150
655	0.0001688	54	102	19	150
656	0.0001515	87	124	18	161
657	0.0001722	60	91	16	122
658	0.000168	70	114	16	158
659	0.0001508	94	123	16	152
660	0.0001572	3	58	13	113
661	0.0001545	76	119	19	162
662	0.0001714	40	83	12	126
663	0.0001484	93	128	19	163
664	0.0001561	130	154	19	178
665	0.0001707	40	85	17	130
666	0.0001598	55	93	14	131
667	0.0001869	132	153	16	174
668	0.0001502	90	108	16	126
669	0.0001614	116	140	19	164
670	0.0001573	73	122	19	171
671	0.0001489	108	134	18	160
672	0.0001524	61	92	16	123
673	0.0001543	51	91	16	131
674	0.0001714	26	87	12	148
675	0.0001522	80	107	19	134
676	0.0001716	23	91	11	159
677	0.0001604	12	65	14	118
678	0.0001639	26	82	13	138
679	0.0001622	2	60	12	118
680	0.0001431	126	138	16	150
681	0.0001485	116	133	17	150
682	0.0001634	12	77	15	142
683	0.0001526	72	115	17	158
684	0.000156	91	124	17	157
685	0.0001547	141	160	19	179
686	0.0001641	82	105	13	128
687	0.0001591	34	83	12	132
688	0.000173	10	67	11	124
689	0.0001645	90	122	17	154
690	0.000184	75	112	17	149
691	0.0001616	58	98	19	138
692	0.0001548	64	98	19	132
693	0.0001798	3	59	16	115
694	0.0001656	9	67	13	125
695	0.000157	107	145	18	183
696	0.0001533	50	88	17	126
697	0.0001592	45	79	12	113
698	0.0001627	22	74	15	126
699	0.0001531	54	89	16	124
700	0.0001744	76	112	19	148
701	0.0001614	24	70	9	116
702	0.0001579	66	96	15	126
703	0.0001688	43	95	19	147
704	0.0001491	88	124	18	160
705	0.0001647	13	81	13	149
706	0.0001675	64	103	18	142
707	0.0001572	24	76	16	128
708	0.0001574	75	119	13	163
709	0.0001445	164	176	18	188
710	0.0001463	135	157	19	179
711	0.0001713	29	93	16	157
712	0.000163	97	127	19	157
713	0.00016	24	72	18	120
714	0.0001547	129	147	16	165
715	0.0001536	84	123	17	162
716	0.0001763	4	61	17	118
717	0.0001538	91	129	19	167
718	0.0001601	50	79	17	108
719	0.0001596	47	86	13	125
720	0.0001673	14	80	11	146
721	0.0001543	120	154	18	188
722	0.000167	45	80	12	115
723	0.0001533	99	136	18	173
724	0.0001833	56	103	17	150
725	0.0001611	41	84	16	127
726	0.0001581	104	134	19	164
727	0.0001815	38	97	19	156
728	0.0001967	18	76	10	134
729	0.0001822	75	110	19	145
730	0.0001571	67	107	15	147
731	0.0001941	78	113	19	148
732	0.0001537	40	93	15	146
733	0.0001514	75	102	13	129
734	0.000148	36	76	16	116
735	0.0001464	101	126	14	151
736	0.0001887	19	81	13	143
737	0.0001581	49	99	17	149
738	0.0001806	114	141	16	168
739	0.0001678	63	101	13	139
740	0.0001732	36	78	17	120
741	0.0001644	44	92	14	140
742	0.0001508	55	91	15	127
743	0.0001704	99	134	18	169
744	0.0001514	81	108	19	135
745	0.0001619	28	89	19	150
746	0.0001518	94	120	19	146
747	0.0001513	76	115	17	154
748	0.0001622	89	121	14	153
749	0.0001561	57	99	14	141
750	0.0001541	125	149	19	173
751	0.0001549	61	94	16	127
752	0.0001633	81	108	16	135
753	0.0001485	73	100	16	127
754	0.0001518	18	64	11	110
755	0.000151	49	84	14	119
756	0.0001508	59	95	14	131
757	0.0001927	63	96	15	129
758	0.0001589	20	67	13	114
759	0.0001451	131	149	19	167
760	0.0001556	57	96	15	135
761	0.0001551	82	121	18	160
762	0.0001738	72	114	17	156
763	0.0001599	116	150	18	184
764	0.0001522	47	84	14	121
765	0.0001608	21	75	12	129
766	0.0001551	68	112	19	156
767	0.000149	123	144	17	165
768	0.0001753	49	98	15	147
769	0.0001652	87	124	18	161
770	0.0001571	20	66	9	112
771	0.0001484	102	121	19	140
772	0.0001543	29	77	18	125
773	0.0002156	47	96	15	145
774	0.000153	88	113	17	138
775	0.0001713	16	67	10	118
776	0.0001683	17	81	19	145
777	0.0001519	62	96	16	130
778	0.0001579	63	96	19	129
779	0.0001606	81	127	14	173
780	0.0002377	77	123	18	169
781	0.0001701	43	85	15	127
782	0.0001674	29	80	12	131
783	0.0001766	4	76	16	148
784	0.0001555	52	101	15	150
785	0.0001518	66	103	14	140
786	0.0001552	92	130	18	168
787	0.0001738	2	55	14	108
788	0.0001574	107	139	16	171
789	0.0001688	59	94	16	129
790	0.0001578	50	89	14	128
791	0.0001796	25	76	13	127
792	0.0001575	127	163	19	199
793	0.0001613	49	90	16	131
794	0.0001819	35	91	11	147
795	0.000179	49	101	11	153
796	0.0001625	64	112	19	160
797	0.0001543	44	73	11	102
798	0.0001836	34	79	9	124
799	0.0001568	48	93	16	138
800	0.0001967	8	73	13	138
801	0.000168	9	53	12	97
802	0.0001565	66	99	18	132
803	0.0001541	61	88	17	115
804	0.0001512	108	136	16	164
805	0.0001628	55	113	17	171
806	0.0001475	127	150	16	173
807	0.0001544	48	94	16	140
808	0.0001971	123	150	17	177
809	0.000148	88	113	16	138
810	0.0001559	18	64	17	110
811	0.0001561	30	77	16	124
812	0.000151	83	119	18	155
813	0.000156	31	82	12	133
814	0.0001484	74	102	15	130
815	0.0001667	3	76	10	149
816	0.0001511	94	116	18	138
817	0.0001621	63	107	15	151
818	0.000177	66	109	19	152
819	0.0001579	51	79	17	107
820	0.000152	40	78	19	116
821	0.0001619	66	100	19	134
822	0.0001612	47	103	13	159
823	0.000165	36	83	19	130
824	0.0001583	27	93	19	159
825	0.0001592	62	99	16	136
826	0.0001801	43	96	14	149
827	0.0001654	16	75	19	134
828	0.0001481	107	136	18	165
829	0.0001623	62	105	14	148
830	0.0001663	9	64	14	119
831	0.00016	36	93	12	150
832	0.0001512	68	104	15	140
833	0.0001662	12	81	16	150
834	0.0001608	8	63	12	118
835	0.0001501	105	133	16	161
836	0.0001604	1	57	13	113
837	0.0001503	119	144	17	169
838	0.0001533	72	107	18	142
839	0.0001603	80	117	19	154
840	0.0001676	34	95	12	156
841	0.0001539	31	73	15	115
842	0.0001644	65	111	19	157
843	0.0001509	97	125	18	153
844	0.0001598	21	76	15	131
845	0.00019	16	77	17	138
846	0.000155	72	110	19	148
847	0.0001574	114	145	19	176
848	0.0001623	3	65	12	127
849	0.0001562	129	148	19	167
850	0.0001662	83	127	19	171
851	0.0002886	54	103	16	152
852	0.0001424	172	180	19	188
853	0.0001733	80	111	17	142
854	0.0001831	132	163	19	194
855	0.0001837	84	123	19	162
856	0.0001535	91	119	15	147
857	0.0001593	55	102	11	149
858	0.0001491	86	118	19	150
859	0.0001506	92	118	16	144
860	0.000151	116	139	18	162
861	0.0001532	132	152	17	172
862	0.0001556	32	81	14	130
863	0.000181	12	82	19	152
864	0.0001606	2	68	16	134
865	0.000173	53	106	16	159
866	0.0001499	65	96	19	127
867	0.0001624	7	61	18	115
868	0.0001649	40	88	17	136
869	0.0001596	63	107	15	151
870	0.000163	55	96	13	137
871	0.0001805	55	94	18	133
872	0.0001596	68	115	17	162
873	0.000158	41	91	10	141
874	0.0001587	52	97	15	142
875	0.0001524	82	117	19	152
876	0.0001581	54	94	19	134
877	0.0001679	21	74	10	127
878	0.0001558	93	124	15	155
879	0.0001675	6	81	19	156
880	0.0001464	130	151	18	172
881	0.0001576	64	116	18	168
882	0.0001572	39	92	16	145
883	0.0001542	94	122	17	150
884	0.0001553	71	111	18	151
885	0.000159	50	101	14	152
886	0.000174	47	78	13	109
887	0.0001497	82	106	17	130
888	0.0001639	144	158	19	172
889	0.0001632	37	88	15	139
890	0.0001526	83	118	17	153
891	0.0001495	83	103	19	123
892	0.0001567	13	61	19	109
893	0.0001608	12	63	11	114
894	0.0002506	17	75	16	133
895	0.0001631	90	127	19	164
896	0.0001575	64	109	18	154
897	0.0001589	53	90	16	127
898	0.0001593	41	98	18	155
899	0.0001699	4	78	12	152
900	0.0001528	23	67	12	111
901	0.0001553	26	70	10	114
902	0.0001649	37	97	16	157
903	0.0001524	122	146	17	170
904	0.0001759	56	93	16	130
905	0.0001597	13	75	17	137
906	0.0001766	28	86	12	144
907	0.0001598	14	61	11	108
908	0.0001496	88	119	17	150
909	0.0001478	117	142	18	167
910	0.0001563	91	121	18	151
911	0.0001502	70	101	15	132
912	0.000158	82	112	17	142
913	0.0001551	34	76	11	118
914	0.0001565	38	83	13	128
915	0.0001667	25	81	13	137
916	0.0001603	8	78	12	148
917	0.0001784	9	75	15	141
918	0.0001512	30	73	14	116
919	0.0001522	123	148	19	173
920	0.0001659	39	90	17	141
921	0.0001515	102	126	19	150
922	0.0001681	30	81	18	132
923	0.0001548	59	95	17	131
924	0.0001633	5	49	7	93
925	0.0001543	107	146	19	185
926	0.0001473	146	161	19	176
927	0.0001787	65	111	14	157
928	0.0001856	65	96	14	127
929	0.0001686	2	65	13	128
930	0.0001613	94	128	19	162
931	0.0001472	150	172	18	194
932	0.0001477	113	133	17	153
933	0.0001663	80	105	17	130
934	0.0001599	24	74	9	124
935	0.0001603	29	77	19	125
936	0.000171	86	125	14	164
937	0.0001555	45	86	19	127
938	0.000156	49	84	18	119
939	0.0001502	96	123	19	150
940	0.0001701	33	94	17	155
941	0.0001472	91	118	14	145
942	0.0001579	19	83	18	147
943	0.0001452	103	120	18	137
944	0.0001715	35	89	16	143
945	0.0001567	104	133	16	162
946	0.0001467	124	151	18	178
947	0.0001815	40	88	16	136
948	0.0001597	43	107	16	171
949	0.0001957	11	65	12	119
950	0.0001509	99	124	19	149
951	0.00017	41	88	17	135
952	0.0002317	136	166	19	196
953	0.0001542	70	104	15	138
954	0.0001491	74	100	19	126
955	0.0001537	65	109	18	153
956	0.0001549	87	118	18	149
957	0.0001581	34	91	18	148
958	0.0001567	98	124	18	150
959	0.00015	89	116	16	143
960	0.0002543	74	108	18	142
961	0.0001637	70	108	14	146
962	0.0001857	87	128	17	169
963	0.0001527	81	117	17	153
964	0.0001574	77	116	17	155
965	0.0001575	65	109	13	153
966	0.0001582	30	89	12	148
967	0.0001756	89	114	18	139
968	0.0001536	47	86	14	125
969	0.0001577	45	86	16	127
970	0.000151	105	132	19	159
971	0.0001706	17	72	15	127
972	0.0002203	96	122	19	148
973	0.0001595	55	93	15	131
974	0.0001656	83	118	17	153
975	0.0001889	95	124	14	153
976	0.0001681	86	115	19	144
977	0.0001636	16	71	15	126
978	0.0001573	58	101	18	144
979	0.0001578	72	100	18	128
980	0.0001536	51	100	13	149
981	0.00017	106	139	19	172
982	0.0001747	23	79	15	135
983	0.000155	69	105	18	141
984	0.0001506	88	119	19	150
985	0.000179	15	85	17	155
986	0.0001755	8	73	19	138
987	0.000158	54	96	18	138
988	0.0001637	7	73	19	139
989	0.0001715	28	69	14	110
990	0.0001559	50	100	18	150
991	0.0001534	66	88	12	110
992	0.0001488	91	120	18	149
993	0.0001576	77	119	15	161
994	0.0001646	103	136	18	169
995	0.0001774	12	87	19	162
996	0.0001559	109	132	17	155
997	0.000163	47	96	16	145
998	0.0001512	84	124	14	164
999	0.0001711	77	117	16	157
mean	0.000163131	61.963	102.478	15.834	142.993

## Sheet: GS_Opt
	time	SEq	Bal	Reg	Egal
0	0.0003371	38	81	13	124
1	0.0003089	48	90	14	132
2	0.000341	21	79	13	137
3	0.0003639	9	74	11	137
4	0.0003269	47	97	12	140
5	0.0003249	8	70	17	132
6	0.0003246	21	88	19	155
7	0.0003226	19	75	11	126
8	0.0003188	20	77	15	134
9	0.0003061	44	87	13	130
10	0.0003266	39	99	16	159
11	0.0003312	11	79	12	147
12	0.0003596	54	94	14	134
13	0.000319	10	58	14	106
14	0.0003571	1	59	11	117
15	0.0003096	57	95	17	133
16	0.0003418	19	79	13	139
17	0.0003284	45	86	14	127
18	0.0003439	5	73	17	141
19	0.0003245	41	86	17	125
20	0.0003697	92	125	15	158
21	0.0003596	34	79	9	124
22	0.0003546	35	90	15	145
23	0.0003209	58	92	15	126
24	0.0003327	10	79	11	148
25	0.0003361	82	122	18	161
26	0.0004295	69	105	17	135
27	0.0003523	42	81	18	120
28	0.0003119	15	60	11	105
29	0.0003261	9	67	10	125
30	0.0003407	10	70	16	130
31	0.0003461	12	65	14	118
32	0.00032	61	92	11	123
33	0.0003338	8	84	18	142
34	0.000351	35	72	11	109
35	0.00036	51	87	14	123
36	0.0003394	6	66	17	126
37	0.0003118	59	100	15	137
38	0.0003319	36	82	17	120
39	0.0003345	24	79	13	134
40	0.0003345	5	68	11	131
41	0.0003498	117	138	16	159
42	0.0003292	111	136	17	161
43	0.0003359	34	73	15	112
44	0.0003295	60	95	17	130
45	0.0003508	45	88	13	129
46	0.0003207	30	81	13	122
47	0.0003331	94	121	18	148
48	0.0003216	49	97	14	145
49	0.0003194	32	79	13	122
50	0.0003253	46	95	13	144
51	0.0003262	34	84	15	134
52	0.0003262	41	76	11	111
53	0.0003174	22	67	11	112
54	0.000316	122	139	16	153
55	0.0003317	18	73	15	121
56	0.0003851	2	78	12	154
57	0.0003097	63	98	19	133
58	0.0003219	55	92	15	129
59	0.0003306	70	121	17	172
60	0.0003268	43	104	19	159
61	0.0003298	30	78	12	126
62	0.0003304	79	119	16	159
63	0.0003653	19	72	16	125
64	0.0003362	102	139	19	176
65	0.000329	18	69	9	120
66	0.000325	50	87	16	124
67	0.0003298	97	125	19	153
68	0.0003325	58	107	14	156
69	0.0003127	53	98	15	143
70	0.0003701	21	74	16	123
71	0.0003974	45	89	19	133
72	0.0003309	68	95	12	122
73	0.000313	42	84	14	126
74	0.0003623	47	83	16	119
75	0.0003541	47	101	16	127
76	0.0003275	42	92	12	142
77	0.0003727	45	83	10	121
78	0.0003319	13	72	9	131
79	0.0003492	23	83	12	133
80	0.0003291	2	55	13	108
81	0.0003166	106	144	18	182
82	0.000327	88	121	17	154
83	0.0003644	28	92	15	156
84	0.000338	26	65	13	104
85	0.0003389	37	84	12	131
86	0.0003486	25	72	10	119
87	0.0003561	4	76	18	148
88	0.0003458	66	111	14	156
89	0.0003361	47	94	13	141
90	0.0003526	20	70	15	120
91	0.0003434	57	89	14	121
92	0.0003448	44	80	14	116
93	0.0003408	6	51	12	96
94	0.0003188	66	91	16	116
95	0.0003231	48	97	17	146
96	0.0003215	15	66	16	117
97	0.0003197	51	80	14	109
98	0.0003247	100	130	17	160
99	0.0003245	17	74	11	131
100	0.0003298	29	71	12	113
101	0.0003937	68	119	16	161
102	0.0003063	80	105	16	130
103	0.0003311	8	75	13	142
104	0.0003137	86	118	16	150
105	0.0003291	65	109	16	153
106	0.0003396	2	55	12	108
107	0.000355	96	135	17	163
108	0.0003217	74	109	16	144
109	0.0003161	13	70	10	127
110	0.0003246	14	71	11	128
111	0.0004507	7	75	17	143
112	0.0003532	81	110	15	139
113	0.0003806	8	69	12	130
114	0.0003865	18	74	12	113
115	0.0003281	45	94	17	143
116	0.0003177	82	114	17	146
117	0.0003275	95	130	17	165
118	0.0003198	68	105	12	142
119	0.0003285	41	84	16	127
120	0.0003339	28	83	14	138
121	0.00037	47	91	12	131
122	0.0003519	67	102	14	137
123	0.0003443	32	83	17	133
124	0.0003127	45	84	10	117
125	0.000341	13	70	14	127
126	0.0003335	8	64	15	120
127	0.0003234	48	92	12	136
128	0.0003111	64	96	13	128
129	0.0003193	15	81	13	147
130	0.0003279	9	65	13	119
131	0.0003284	23	68	10	113
132	0.0003199	42	86	18	130
133	0.0003611	5	73	13	141
134	0.0003478	53	87	17	119
135	0.0003185	113	133	16	153
136	0.0003481	38	70	11	102
137	0.0003402	77	111	19	145
138	0.0003218	42	77	15	112
139	0.0003327	28	84	13	140
140	0.0003578	7	65	11	123
141	0.000355	27	94	18	161
142	0.0003268	23	82	11	141
143	0.000322	3	71	14	139
144	0.0003128	44	96	14	143
145	0.0003424	27	84	15	141
146	0.0003754	79	115	18	151
147	0.0003108	55	85	13	115
148	0.0003188	43	84	13	120
149	0.0003112	18	71	15	124
150	0.0003378	44	92	18	140
151	0.0003489	21	74	13	127
152	0.0003325	61	106	18	136
153	0.0004194	44	95	17	146
154	0.0003415	3	68	16	133
155	0.0003372	65	107	12	149
156	0.0003104	51	96	10	141
157	0.0003042	75	110	16	142
158	0.0003346	39	96	18	136
159	0.0003253	106	129	16	152
160	0.0003235	61	104	19	147
161	0.0003283	52	96	15	140
162	0.0003188	79	112	16	145
163	0.0003333	14	68	14	122
164	0.0003204	23	74	16	125
165	0.0003607	47	99	12	142
166	0.0003569	18	91	16	164
167	0.0003408	8	52	13	96
168	0.0003456	28	77	12	126
169	0.0003111	81	124	17	159
170	0.0003395	2	72	16	142
171	0.0003055	39	87	15	119
172	0.0003263	29	75	11	118
173	0.0003315	81	120	17	159
174	0.0003557	45	88	11	130
175	0.0003523	21	85	16	149
176	0.0003392	9	68	15	127
177	0.000321	6	76	12	130
178	0.0003123	45	76	13	107
179	0.0003809	3	68	13	133
180	0.0003557	21	74	13	127
181	0.0003056	55	90	15	125
182	0.0003582	87	117	16	147
183	0.000362	57	88	13	115
184	0.0003364	28	73	12	104
185	0.0003276	3	67	12	131
186	0.000347	11	69	15	127
187	0.0003121	24	79	11	134
188	0.0003239	39	80	16	121
189	0.0003164	90	121	15	152
190	0.0003366	71	116	16	161
191	0.0003412	8	66	12	124
192	0.0003341	28	83	19	138
193	0.0003402	56	104	19	152
194	0.0003287	32	77	14	122
195	0.0003039	56	88	16	120
196	0.0003393	71	116	18	156
197	0.0003094	50	91	16	132
198	0.0003207	57	95	18	133
199	0.0003501	50	88	18	126
200	0.0003762	21	89	17	157
201	0.0003321	28	78	12	127
202	0.0003411	2	76	14	150
203	0.0003284	24	78	15	132
204	0.0003228	61	116	16	162
205	0.0003228	90	115	18	140
206	0.0003494	44	96	15	148
207	0.0003103	23	62	11	98
208	0.0003475	44	83	15	122
209	0.0003434	18	68	13	118
210	0.0004602	7	70	16	133
211	0.000363	72	109	15	143
212	0.0003282	92	127	18	158
213	0.0003161	28	78	11	128
214	0.0003352	74	106	18	138
215	0.0003194	42	90	14	138
216	0.000337	30	59	12	88
217	0.0003519	6	48	8	90
218	0.0003061	84	120	16	156
219	0.0003752	68	112	13	156
220	0.0003164	124	140	16	156
221	0.0003187	58	111	17	164
222	0.0003491	16	76	14	136
223	0.0003214	53	98	17	143
224	0.0003253	19	77	12	135
225	0.0003484	27	82	12	137
226	0.0003425	15	69	12	116
227	0.0003388	23	70	17	110
228	0.0003118	36	80	15	124
229	0.0003119	46	83	13	120
230	0.0003515	17	77	12	137
231	0.0003274	29	80	15	131
232	0.0003251	54	100	18	143
233	0.0003251	21	75	11	129
234	0.0003161	31	77	13	111
235	0.0003378	20	70	11	120
236	0.000333	24	76	13	128
237	0.0003406	41	88	18	135
238	0.0003269	44	99	18	135
239	0.0003359	5	80	13	155
240	0.0003429	36	71	15	106
241	0.000333	7	69	12	131
242	0.0003329	78	121	16	164
243	0.0003826	24	82	13	140
244	0.0003254	16	72	10	128
245	0.0003808	50	79	11	108
246	0.0003343	16	72	13	128
247	0.0003132	78	114	19	150
248	0.0003339	105	125	18	145
249	0.0003193	53	90	16	127
250	0.0003284	76	112	12	148
251	0.0003331	4	66	11	126
252	0.00032	20	78	14	136
253	0.0003332	88	126	17	164
254	0.0003163	69	97	15	125
255	0.0003373	44	87	12	130
256	0.000336	35	87	14	139
257	0.0003206	55	100	13	145
258	0.0003361	17	75	12	133
259	0.0003276	5	71	11	137
260	0.0004131	9	88	16	161
261	0.0003181	82	122	18	162
262	0.0003343	28	78	15	128
263	0.0003341	36	84	16	132
264	0.0003316	23	76	14	129
265	0.0003018	73	104	17	135
266	0.0003379	10	64	11	113
267	0.0003692	14	81	16	148
268	0.0003355	59	105	18	151
269	0.000369	42	97	13	147
270	0.0003281	35	72	15	109
271	0.0003229	86	125	13	164
272	0.0003249	85	116	18	147
273	0.0003194	59	95	16	131
274	0.0003433	39	86	15	133
275	0.0003589	14	68	14	122
276	0.00033	60	101	13	135
277	0.0003698	10	69	12	128
278	0.0003274	94	118	15	142
279	0.0003465	2	76	9	150
280	0.0003829	3	72	11	123
281	0.0004272	35	86	17	137
282	0.0003203	59	85	14	111
283	0.0003234	84	106	15	128
284	0.0003547	79	106	13	133
285	0.0003436	45	104	17	152
286	0.0003571	13	66	17	119
287	0.0003498	76	110	17	140
288	0.0003857	73	100	13	127
289	0.0003298	16	59	15	102
290	0.0003824	0	61	16	122
291	0.0003361	42	93	13	144
292	0.0003088	61	99	17	137
293	0.0003154	25	70	10	115
294	0.0003219	57	101	17	145
295	0.0003029	105	129	18	153
296	0.0003426	6	77	18	148
297	0.0003234	28	82	17	136
298	0.0003233	24	73	14	122
299	0.0003575	24	81	18	137
300	0.0003346	56	92	18	128
301	0.0003419	65	106	15	147
302	0.0003239	7	53	8	99
303	0.0003783	13	70	9	123
304	0.0003424	31	83	15	135
305	0.0003446	44	96	14	148
306	0.000311	101	128	18	155
307	0.0003156	32	81	18	130
308	0.0003307	57	99	16	141
309	0.0003014	100	120	17	140
310	0.000319	69	106	14	141
311	0.0003636	24	72	9	120
312	0.0003499	21	82	14	143
313	0.0003486	82	109	15	136
314	0.0003469	18	70	15	122
315	0.0003316	71	100	14	129
316	0.0003265	43	95	16	147
317	0.0003686	7	66	12	125
318	0.0003235	55	107	18	159
319	0.0003262	81	106	13	131
320	0.0003078	53	95	14	126
321	0.0003025	120	144	16	168
322	0.0003524	24	84	17	144
323	0.0003127	27	70	11	113
324	0.000323	45	87	18	129
325	0.0003311	57	99	15	141
326	0.0003212	7	76	10	145
327	0.000374	69	115	19	161
328	0.0003205	44	88	14	123
329	0.000354	2	60	16	114
330	0.0004977	6	74	14	135
331	0.0003255	65	107	19	149
332	0.0004401	55	97	15	139
333	0.0003524	27	74	11	121
334	0.0003686	14	70	12	126
335	0.0004362	9	80	13	151
336	0.0003419	24	80	15	136
337	0.0003089	58	102	15	146
338	0.0003104	87	116	17	145
339	0.0003347	12	60	12	108
340	0.0003757	57	87	15	117
341	0.0003318	49	102	14	152
342	0.0003192	135	159	16	183
343	0.0003358	31	89	18	147
344	0.0003481	22	83	16	141
345	0.0003378	28	82	16	136
346	0.0003344	19	77	11	135
347	0.0003123	83	120	14	144
348	0.0003124	64	105	17	146
349	0.0003184	32	88	13	134
350	0.0003184	31	75	11	119
351	0.0003447	56	98	16	140
352	0.0003267	14	69	12	124
353	0.0003383	36	86	15	136
354	0.0003345	27	80	14	133
355	0.0003261	37	66	12	95
356	0.0003158	42	102	16	151
357	0.0003095	35	83	12	131
358	0.0003513	43	101	15	140
359	0.0003074	63	94	15	124
360	0.0003369	22	69	11	116
361	0.0003228	14	61	12	108
362	0.0003317	52	92	14	132
363	0.0003145	28	76	17	124
364	0.0003658	17	74	13	131
365	0.0003235	48	86	12	124
366	0.0003478	67	100	16	133
367	0.0003104	49	83	15	117
368	0.0003282	42	89	15	136
369	0.0003205	75	111	13	147
370	0.0003626	61	101	14	141
371	0.0003155	60	102	14	144
372	0.0003348	22	76	18	130
373	0.0003225	60	101	12	142
374	0.0003178	31	92	17	153
375	0.0003429	42	95	17	138
376	0.0003442	61	97	13	130
377	0.0003345	15	65	9	115
378	0.0003326	33	90	19	146
379	0.0003365	53	104	16	155
380	0.000343	14	72	11	120
381	0.0003312	18	77	15	135
382	0.0003361	91	127	17	163
383	0.0003677	37	80	11	123
384	0.0003453	66	102	14	138
385	0.0003488	48	111	17	172
386	0.0003424	35	75	10	115
387	0.0003137	39	89	12	120
388	0.0003397	30	74	15	118
389	0.0003352	4	77	15	136
390	0.0003245	50	94	17	138
391	0.0003236	18	62	15	106
392	0.0003435	4	73	17	142
393	0.0003307	53	92	14	131
394	0.0003085	87	109	16	131
395	0.0003297	52	90	16	125
396	0.000396	43	82	17	121
397	0.0003498	38	70	10	102
398	0.0003463	24	68	16	112
399	0.0003549	10	76	13	142
400	0.0004	37	80	13	123
401	0.0003283	1	50	12	99
402	0.0003286	47	102	13	151
403	0.0003248	8	68	17	128
404	0.0003367	25	80	12	135
405	0.0003508	16	81	17	146
406	0.0003154	44	84	14	124
407	0.0003529	4	68	14	132
408	0.0003133	53	88	14	123
409	0.0003359	29	84	16	131
410	0.0003262	1	71	18	141
411	0.0003693	58	98	16	133
412	0.0003793	46	105	17	164
413	0.0003167	69	102	15	135
414	0.0003592	38	97	12	146
415	0.0003478	57	94	16	131
416	0.0003661	27	62	13	97
417	0.0003224	42	95	14	135
418	0.0003189	79	105	17	131
419	0.0003329	79	116	18	149
420	0.0003658	72	103	14	134
421	0.000339	17	60	14	103
422	0.0004114	90	133	16	174
423	0.0003516	45	84	15	120
424	0.0003084	100	129	19	157
425	0.0003808	37	85	12	133
426	0.0003472	24	97	18	158
427	0.0003843	58	96	16	134
428	0.0003363	29	85	11	141
429	0.0003113	84	108	19	129
430	0.0003437	45	79	10	113
431	0.0003589	58	105	17	142
432	0.000376	52	96	18	140
433	0.0003512	46	118	14	183
434	0.0003314	48	82	17	116
435	0.0003262	68	110	14	148
436	0.0003223	4	70	13	136
437	0.0003354	34	77	11	120
438	0.000324	98	120	14	142
439	0.0003229	7	64	17	121
440	0.000325	61	108	15	155
441	0.0003545	28	66	15	104
442	0.0003402	42	95	14	148
443	0.0003593	32	73	13	114
444	0.0003289	5	66	12	127
445	0.0003267	42	85	18	128
446	0.0003278	11	61	11	111
447	0.0003883	66	109	13	152
448	0.0003255	7	67	13	127
449	0.0003128	121	137	19	153
450	0.0003338	8	67	15	126
451	0.000331	7	55	11	103
452	0.0003219	60	91	13	122
453	0.000318	14	58	14	102
454	0.0003001	116	142	15	168
455	0.0003659	69	103	14	137
456	0.0004143	22	75	13	128
457	0.0003413	66	115	18	164
458	0.0003087	68	96	14	124
459	0.0003351	17	65	9	111
460	0.0003264	51	104	18	157
461	0.0003213	58	95	17	129
462	0.0003448	30	70	10	110
463	0.0003369	64	103	14	142
464	0.0003221	51	92	12	131
465	0.0004533	31	91	17	151
466	0.0003198	2	56	9	110
467	0.0003063	63	92	17	121
468	0.0003221	84	110	17	136
469	0.0003324	13	80	14	147
470	0.0003392	63	99	11	135
471	0.0003122	71	105	17	139
472	0.0003378	2	57	10	107
473	0.0003208	29	87	15	145
474	0.0003445	12	78	12	144
475	0.0003321	16	61	16	106
476	0.0003323	6	68	12	120
477	0.000319	36	80	15	124
478	0.0003407	39	77	10	115
479	0.0003109	102	137	16	172
480	0.00031	65	96	18	127
481	0.0003403	4	70	15	133
482	0.0003755	11	82	15	140
483	0.0003333	43	88	17	133
484	0.0003325	77	98	14	119
485	0.000299	64	95	13	126
486	0.0003284	10	69	14	128
487	0.000316	20	69	12	118
488	0.0003092	69	114	18	145
489	0.0003497	40	86	14	132
490	0.0003253	35	88	14	141
491	0.0003549	7	72	13	137
492	0.0004162	48	84	18	120
493	0.0003361	36	86	13	136
494	0.000322	64	103	12	142
495	0.0003225	56	103	16	150
496	0.0003662	25	70	14	115
497	0.0003223	59	81	13	102
498	0.0003204	53	94	14	135
499	0.0003272	22	74	15	126
500	0.0003498	43	96	15	149
501	0.0003068	65	97	17	129
502	0.0003028	62	97	16	132
503	0.0003158	44	92	14	139
504	0.0003439	3	57	12	111
505	0.0003621	35	95	14	148
506	0.000408	6	86	16	166
507	0.0003482	32	79	16	126
508	0.000343	30	87	14	139
509	0.0003125	53	91	17	128
510	0.0003372	39	93	13	147
511	0.0003335	37	75	12	113
512	0.0003592	2	80	16	158
513	0.0003082	41	89	13	137
514	0.0003267	35	76	15	117
515	0.000334	78	115	15	152
516	0.0003624	12	51	7	90
517	0.0003978	35	93	13	151
518	0.0003778	39	96	19	153
519	0.000333	54	92	12	130
520	0.0003183	22	81	13	140
521	0.0003291	52	98	16	144
522	0.0003394	25	73	12	121
523	0.0003366	63	94	9	125
524	0.000326	89	124	16	155
525	0.0003242	38	89	16	140
526	0.0003313	10	68	17	126
527	0.0003069	10	73	13	136
528	0.0003342	83	109	15	135
529	0.0003173	43	79	14	115
530	0.0003315	55	102	17	149
531	0.0003095	71	110	15	149
532	0.0003557	43	90	17	137
533	0.0003156	44	91	14	121
534	0.0003713	45	96	14	147
535	0.0003635	2	75	13	148
536	0.000377	96	125	18	154
537	0.0003735	75	114	17	148
538	0.0004427	13	68	15	123
539	0.0003395	44	99	17	153
540	0.0003725	8	68	12	128
541	0.0003175	33	77	12	121
542	0.0003267	68	108	17	148
543	0.0003047	83	122	18	141
544	0.0003941	48	93	19	138
545	0.0003286	12	76	16	140
546	0.0003534	20	73	11	126
547	0.000351	11	70	9	129
548	0.0003425	31	75	12	119
549	0.0003752	13	75	10	129
550	0.0003306	29	88	11	147
551	0.0003184	37	85	14	122
552	0.0003189	67	113	18	159
553	0.0003296	40	85	18	130
554	0.000325	21	77	9	131
555	0.0003265	39	89	15	139
556	0.0003486	1	63	11	121
557	0.0003168	93	124	16	155
558	0.0003258	24	75	15	126
559	0.0003546	70	99	15	128
560	0.0003424	45	89	11	133
561	0.0003452	44	93	15	131
562	0.0003735	64	106	18	148
563	0.0003363	49	106	18	155
564	0.0003574	49	89	16	129
565	0.0003382	5	59	18	113
566	0.0003382	12	82	13	141
567	0.0003321	55	95	11	135
568	0.0003656	46	95	14	144
569	0.0003348	56	93	13	130
570	0.0003459	6	66	14	126
571	0.0003243	51	85	17	119
572	0.0003394	41	96	17	136
573	0.0003208	21	74	14	126
574	0.0003487	82	130	15	178
575	0.0003291	72	103	15	134
576	0.0003694	42	84	11	126
577	0.0003965	39	101	18	163
578	0.0003256	32	82	13	132
579	0.0003478	40	88	16	136
580	0.000353	11	80	12	136
581	0.0003769	53	107	17	148
582	0.0003255	23	63	17	103
583	0.0003323	2	69	13	136
584	0.0003177	87	112	19	137
585	0.0003288	36	86	15	136
586	0.0003313	35	79	14	123
587	0.0003575	25	80	12	135
588	0.0003418	31	78	14	125
589	0.0003132	34	93	11	152
590	0.0003363	2	79	19	143
591	0.0003195	9	67	16	125
592	0.0003222	73	111	19	149
593	0.0003423	59	107	15	153
594	0.0003161	54	94	13	134
595	0.0003269	20	76	14	132
596	0.0003529	25	86	15	147
597	0.0003398	18	55	13	92
598	0.0003277	32	84	16	136
599	0.0003514	7	65	10	123
600	0.0003504	61	95	15	129
601	0.0003373	68	106	15	144
602	0.0003625	8	70	19	132
603	0.000322	72	111	16	150
604	0.0003479	24	78	15	123
605	0.0003398	25	93	15	158
606	0.0003403	67	103	13	139
607	0.0003226	1	57	10	113
608	0.0003662	39	95	13	135
609	0.0003129	95	127	16	159
610	0.0003307	52	102	14	152
611	0.0003519	72	107	13	142
612	0.0003926	21	79	12	137
613	0.000325	31	88	16	145
614	0.0004172	24	74	15	124
615	0.0003426	4	51	11	98
616	0.0003389	65	94	11	123
617	0.0003232	130	161	17	185
618	0.0003401	12	78	13	143
619	0.0003249	42	87	16	131
620	0.0003195	74	109	14	144
621	0.0003603	11	68	10	125
622	0.0003533	27	79	16	131
623	0.0003389	82	118	19	148
624	0.000365	12	68	10	124
625	0.0003328	36	79	12	117
626	0.0003275	69	111	14	151
627	0.0003428	3	66	18	129
628	0.0003637	27	82	9	121
629	0.000391	15	68	12	121
630	0.0003223	89	118	19	147
631	0.0003592	41	80	14	119
632	0.0003427	12	73	13	134
633	0.0003342	63	105	15	145
634	0.0003287	11	68	11	125
635	0.000312	77	110	18	143
636	0.0003346	59	92	15	125
637	0.0003256	60	102	17	144
638	0.0003643	29	72	13	115
639	0.0003419	0	73	17	145
640	0.0003156	30	63	9	96
641	0.0003066	62	91	11	120
642	0.0003321	79	122	18	161
643	0.0003299	3	62	14	117
644	0.0003502	8	62	12	116
645	0.0003253	40	80	12	120
646	0.0003517	42	76	18	110
647	0.0003278	63	95	15	127
648	0.0003285	26	83	15	140
649	0.0003146	107	134	18	161
650	0.00037	35	75	13	115
651	0.0003245	24	70	12	116
652	0.0003391	75	118	15	161
653	0.000339	15	78	14	141
654	0.0003347	24	91	14	150
655	0.0003418	54	102	18	150
656	0.0003518	87	124	18	156
657	0.0003581	60	91	16	122
658	0.0003467	50	97	11	144
659	0.000338	34	83	12	132
660	0.000328	3	58	13	108
661	0.0003242	76	119	19	162
662	0.0003362	40	83	12	126
663	0.0003186	15	73	12	131
664	0.0003957	55	92	16	129
665	0.0003566	40	85	17	130
666	0.0003409	33	69	12	105
667	0.0003613	87	127	16	167
668	0.0003311	53	87	16	121
669	0.000331	63	95	17	127
670	0.0003586	15	89	12	163
671	0.0003402	2	61	9	120
672	0.0003244	61	92	16	123
673	0.0003172	51	91	16	131
674	0.0003354	26	87	12	148
675	0.0003125	80	107	16	134
676	0.0003495	23	91	11	159
677	0.0003175	12	65	14	118
678	0.0003391	26	82	13	138
679	0.0003493	2	60	12	118
680	0.0003345	87	123	15	150
681	0.0003035	79	100	17	121
682	0.0003312	12	77	12	142
683	0.0003305	26	91	13	156
684	0.0003608	53	87	14	121
685	0.000364	141	160	19	179
686	0.0003581	61	100	13	128
687	0.0003344	34	83	12	132
688	0.0003474	10	67	11	124
689	0.0003441	86	121	16	154
690	0.0003592	47	83	14	119
691	0.0003241	22	72	13	122
692	0.0003367	39	85	15	131
693	0.0003544	3	59	16	115
694	0.0003535	9	67	13	125
695	0.0003476	80	127	16	174
696	0.0003232	50	88	14	126
697	0.0003428	45	79	12	113
698	0.0003428	22	74	13	125
699	0.0003172	54	89	14	121
700	0.0003603	24	74	18	124
701	0.0003428	24	70	9	116
702	0.0003365	66	96	15	126
703	0.0003299	43	95	18	144
704	0.0003129	81	116	17	151
705	0.0003277	13	81	13	149
706	0.0003337	58	94	16	130
707	0.0003545	24	76	16	128
708	0.0003291	75	119	13	163
709	0.0003231	70	101	15	132
710	0.0003086	71	113	14	155
711	0.000339	29	93	16	154
712	0.0003964	91	122	16	153
713	0.0003912	24	72	16	120
714	0.0003294	5	67	14	129
715	0.000381	84	123	17	162
716	0.0003814	4	61	17	118
717	0.0003198	91	128	15	154
718	0.0003222	31	67	15	103
719	0.0003552	0	55	12	110
720	0.0003327	14	80	11	146
721	0.0003333	75	125	18	175
722	0.0003226	45	80	12	115
723	0.0003188	93	128	18	163
724	0.0003723	24	78	11	132
725	0.0003228	41	84	16	127
726	0.0003344	62	100	17	138
727	0.0004472	28	91	15	154
728	0.0003655	18	76	10	126
729	0.0003496	75	110	19	145
730	0.0003129	67	107	15	147
731	0.0003627	78	113	14	143
732	0.0003183	40	93	15	131
733	0.0003216	75	102	13	129
734	0.0003174	36	76	16	116
735	0.0003063	35	75	8	115
736	0.0003698	19	81	13	142
737	0.0003392	3	69	13	135
738	0.0003417	42	91	11	140
739	0.0003404	63	101	13	139
740	0.0003414	36	78	17	120
741	0.0003435	39	85	14	131
742	0.0003164	36	89	15	127
743	0.0003432	80	118	18	156
744	0.0003349	14	67	12	120
745	0.0003229	28	89	17	137
746	0.0003245	84	116	15	146
747	0.0003161	51	100	14	149
748	0.0003428	38	97	14	153
749	0.0003354	57	99	14	141
750	0.0003365	25	83	12	141
751	0.0003497	35	86	16	127
752	0.0003795	47	87	16	127
753	0.0003293	73	100	16	127
754	0.0003291	18	64	11	110
755	0.000328	49	84	14	119
756	0.0003307	40	85	14	130
757	0.0003637	63	96	15	129
758	0.0003173	20	67	13	114
759	0.0003431	26	80	19	134
760	0.0003071	57	96	15	135
761	0.0003109	76	116	17	156
762	0.0003558	72	114	17	156
763	0.0003768	78	111	15	144
764	0.0003294	47	84	14	121
765	0.0003365	21	75	12	129
766	0.0003493	39	86	14	133
767	0.000333	24	74	14	124
768	0.0003667	22	86	13	147
769	0.0003863	32	93	16	154
770	0.0003612	20	66	9	109
771	0.0003208	60	104	15	140
772	0.0003465	29	77	15	125
773	0.0003727	47	96	15	145
774	0.0003273	53	103	17	138
775	0.000408	16	67	10	118
776	0.0003435	17	81	17	145
777	0.0003324	62	96	16	130
778	0.0003458	49	87	12	125
779	0.0003339	28	86	9	144
780	0.0003983	77	123	18	169
781	0.0003545	43	85	15	127
782	0.0003453	29	80	12	131
783	0.0003421	4	76	11	148
784	0.0003381	40	90	13	140
785	0.0003412	66	103	14	140
786	0.0003236	49	91	15	133
787	0.0003264	2	55	14	108
788	0.0003453	62	109	15	156
789	0.0003271	59	94	16	129
790	0.0003487	30	81	14	128
791	0.0003502	23	73	13	123
792	0.0003439	56	105	14	154
793	0.0003766	49	90	16	131
794	0.0003669	35	91	11	147
795	0.0003451	36	91	11	146
796	0.000338	64	112	19	160
797	0.0003305	3	63	11	102
798	0.0003854	21	72	9	123
799	0.0003335	48	93	16	138
800	0.0003629	8	73	13	138
801	0.0003392	9	53	12	97
802	0.0003252	66	99	18	132
803	0.0003611	61	88	17	115
804	0.0003565	107	133	16	159
805	0.0003465	55	113	17	171
806	0.0003091	108	143	16	173
807	0.0003289	48	94	16	140
808	0.0004047	17	67	9	117
809	0.0003216	4	58	11	112
810	0.0003259	7	63	17	110
811	0.0003223	22	75	15	124
812	0.000307	83	117	13	149
813	0.0003223	19	70	9	121
814	0.0003106	27	92	15	130
815	0.0003482	3	76	10	149
816	0.0003205	86	113	14	138
817	0.0003487	13	77	15	141
818	0.0003401	66	109	18	152
819	0.0003434	14	60	15	106
820	0.0003374	30	73	15	116
821	0.0003309	57	100	19	134
822	0.0004548	47	103	13	145
823	0.0003203	36	83	15	128
824	0.000316	27	93	14	136
825	0.0003324	62	99	16	136
826	0.0003407	43	96	14	138
827	0.0003257	16	75	19	134
828	0.0003148	8	68	11	128
829	0.0003377	45	92	14	139
830	0.0003288	9	64	14	119
831	0.0003626	6	75	12	144
832	0.000328	4	73	15	140
833	0.0003237	12	81	16	150
834	0.0003237	8	63	12	118
835	0.0003152	105	133	16	161
836	0.0003183	1	57	13	113
837	0.0003295	14	80	14	146
838	0.0003568	72	107	16	142
839	0.0003256	80	117	19	154
840	0.0003498	32	87	12	142
841	0.0003278	31	73	15	115
842	0.000328	65	111	19	153
843	0.0003089	76	106	15	136
844	0.000324	21	76	15	131
845	0.000366	16	77	17	138
846	0.0003151	72	110	18	148
847	0.0003328	114	145	18	176
848	0.000325	3	65	12	127
849	0.0003127	112	133	19	154
850	0.0003441	45	100	18	155
851	0.0004522	52	87	16	122
852	0.0003005	62	106	15	150
853	0.0003662	25	73	17	121
854	0.0003556	112	142	17	172
855	0.0003978	74	107	18	140
856	0.0003197	36	94	15	147
857	0.0003393	55	102	11	139
858	0.0003188	86	118	16	150
859	0.0003309	54	93	14	132
860	0.0003187	28	88	13	148
861	0.0003591	76	122	17	168
862	0.0003338	32	81	14	130
863	0.0003453	12	82	16	143
864	0.0003769	2	68	16	134
865	0.0003315	53	106	16	159
866	0.0003585	16	74	17	127
867	0.0003353	7	61	18	115
868	0.0003482	40	88	15	136
869	0.0004974	63	107	15	151
870	0.00036	6	68	13	130
871	0.0003925	55	94	17	133
872	0.0003279	45	90	12	135
873	0.0004026	11	77	10	141
874	0.0003868	34	92	13	142
875	0.0003178	82	117	19	152
876	0.0003377	31	72	13	113
877	0.0003303	21	74	10	127
878	0.0003407	2	66	10	130
879	0.0003943	6	81	16	147
880	0.0003125	93	121	18	149
881	0.0003365	37	87	11	137
882	0.000309	39	92	16	126
883	0.0003094	94	122	17	143
884	0.0003135	57	93	12	129
885	0.0003507	21	84	14	147
886	0.0003461	47	78	13	109
887	0.000328	41	92	17	130
888	0.0003138	124	139	18	154
889	0.0003369	34	88	15	139
890	0.0003554	51	97	17	143
891	0.0003763	59	89	14	119
892	0.0003188	13	61	16	109
893	0.0003259	12	63	11	114
894	0.0004157	17	75	16	130
895	0.000335	43	95	17	147
896	0.0003344	64	109	18	154
897	0.0003382	41	76	15	111
898	0.0003212	41	98	18	155
899	0.0003379	4	78	12	144
900	0.0003177	23	67	12	111
901	0.0003198	26	70	10	114
902	0.0003481	13	77	16	141
903	0.0003302	5	74	13	143
904	0.000327	56	93	16	130
905	0.0003295	13	67	14	121
906	0.0003446	28	86	12	143
907	0.0003237	14	61	11	108
908	0.0003204	64	112	17	150
909	0.000354	54	98	18	142
910	0.0003316	91	121	18	151
911	0.0003524	70	101	15	116
912	0.000317	63	101	16	139
913	0.0003449	14	71	11	118
914	0.0003276	3	56	13	109
915	0.0003322	25	81	13	137
916	0.0003855	7	78	12	148
917	0.0003467	9	75	15	141
918	0.0003219	30	73	14	116
919	0.0003424	113	148	18	173
920	0.00032	39	90	17	141
921	0.0003657	14	75	10	136
922	0.0003435	30	81	15	132
923	0.0003212	7	61	9	115
924	0.0004089	5	49	7	93
925	0.0003144	81	116	15	151
926	0.0003305	56	106	17	156
927	0.0003509	8	83	12	157
928	0.0003572	65	96	13	127
929	0.0003841	2	65	13	128
930	0.0003253	14	67	10	120
931	0.0003358	40	92	16	144
932	0.0003326	97	131	17	153
933	0.0003268	14	72	12	130
934	0.0003359	24	74	9	124
935	0.0003399	29	77	17	125
936	0.0003328	47	98	14	149
937	0.0003362	45	86	17	127
938	0.0003237	49	84	15	119
939	0.0003551	96	123	19	150
940	0.0003415	12	78	17	144
941	0.0003264	51	92	13	133
942	0.0003413	19	83	17	147
943	0.0003485	7	79	18	137
944	0.0003295	35	89	16	143
945	0.0003504	25	83	14	141
946	0.0004819	37	104	15	171
947	0.0003501	40	88	16	136
948	0.0003675	43	107	14	147
949	0.0003603	11	65	10	119
950	0.0003247	82	116	14	149
951	0.0003525	41	88	15	135
952	0.0004171	125	158	18	191
953	0.0003757	70	104	15	138
954	0.0003342	61	97	17	126
955	0.0003298	11	74	11	137
956	0.000314	71	109	17	147
957	0.0003312	34	91	18	148
958	0.0003136	92	122	17	150
959	0.0003085	38	80	13	122
960	0.0004455	26	85	16	142
961	0.0003348	70	108	14	146
962	0.0003746	54	98	13	142
963	0.0003325	54	96	13	138
964	0.0003742	35	92	14	149
965	0.0003567	65	109	13	153
966	0.0003186	30	89	12	148
967	0.0003511	57	101	18	139
968	0.0003115	19	70	9	121
969	0.0003473	6	65	16	124
970	0.0003085	68	106	17	144
971	0.0003432	17	72	12	125
972	0.0004221	96	122	17	148
973	0.0003178	55	93	15	131
974	0.0003617	64	105	17	146
975	0.0003615	28	80	11	132
976	0.0003447	57	100	19	143
977	0.0003305	16	71	15	126
978	0.0003178	58	101	18	144
979	0.0003446	5	57	13	109
980	0.0003132	41	89	11	137
981	0.0003341	61	116	19	171
982	0.0003417	23	79	15	128
983	0.0003341	33	78	10	123
984	0.0003683	27	83	15	139
985	0.0003605	7	77	17	147
986	0.0003719	3	71	19	138
987	0.0003773	44	88	10	132
988	0.0003243	7	73	18	135
989	0.0003546	28	69	14	110
990	0.0003123	50	100	18	150
991	0.0003543	26	83	12	110
992	0.0003045	45	82	13	119
993	0.0003204	37	85	15	133
994	0.0003941	4	71	15	138
995	0.0003497	12	87	15	162
996	0.0003335	109	132	17	155
997	0.0003446	47	96	16	144
998	0.0003068	84	122	14	159
999	0.0003378	64	112	16	157
mean	0.000339876	41.888	89.144	14.493	134.85

## Sheet: PolyMin_SEq
	time	SEq	Bal	Reg	Egal
0	0.0030979	36	77	19	118
1	0.0030464	8	64	18	120
2	0.0031869	15	76	17	137
3	0.0029252	59	98	11	137
4	0.0030755	47	97	12	147
5	0.0028916	8	70	17	132
6	0.0032101	6	78	15	150
7	0.0029866	19	75	11	131
8	0.0030425	15	70	11	125
9	0.0029941	2	59	10	116
10	0.0030961	22	96	16	170
11	0.0028176	11	79	12	147
12	0.0031915	53	106	13	159
13	0.0031487	10	58	14	106
14	0.0028758	1	59	11	117
15	0.0031674	24	69	10	114
16	0.0029835	19	79	14	139
17	0.0031465	14	69	16	124
18	0.0029357	5	73	17	141
19	0.0028605	11	68	11	125
20	0.0032917	8	73	16	138
21	0.0026247	34	79	9	124
22	0.0030213	35	90	15	145
23	0.0030757	4	63	9	122
24	0.0028654	10	74	10	138
25	0.0030734	14	84	16	154
26	0.0030693	33	86	17	139
27	0.0032274	10	59	12	108
28	0.0028881	15	60	11	105
29	0.0028484	6	67	10	128
30	0.0028688	10	70	16	130
31	0.0031462	10	67	13	124
32	0.0031978	43	80	14	117
33	0.0030222	25	81	11	137
34	0.0029294	24	70	9	116
35	0.0034085	21	71	14	121
36	0.002928	5	65	17	125
37	0.0031792	21	70	13	119
38	0.0033478	17	66	8	115
39	0.0029726	10	73	12	136
40	0.0028726	5	68	12	131
41	0.0032957	79	108	11	137
42	0.0032634	17	66	11	115
43	0.0027077	34	73	15	112
44	0.0036077	30	88	13	146
45	0.0028783	45	94	13	143
46	0.0030712	76	99	13	122
47	0.0033421	26	85	14	144
48	0.0030341	25	77	10	129
49	0.0031151	20	75	12	130
50	0.003	13	73	13	133
51	0.0031253	17	66	14	115
52	0.0030036	41	76	11	111
53	0.0028889	22	67	11	112
54	0.003502	12	55	8	98
55	0.0029502	20	62	13	104
56	0.0028635	2	78	12	154
57	0.0031665	37	83	14	129
58	0.0031921	3	65	11	127
59	0.0032813	8	83	16	158
60	0.0032368	22	86	17	150
61	0.0031017	2	63	14	124
62	0.0030467	4	82	13	160
63	0.0029533	19	72	16	125
64	0.0031354	11	73	13	135
65	0.002982	4	58	8	112
66	0.0030948	6	58	13	110
67	0.0033276	1	59	12	117
68	0.0032074	3	78	16	153
69	0.0033228	19	71	9	123
70	0.0029993	21	74	16	127
71	0.0031057	7	70	17	133
72	0.0032454	10	68	11	126
73	0.003039	28	76	18	124
74	0.0029659	9	64	13	119
75	0.0029132	43	77	12	111
76	0.0030569	17	80	10	143
77	0.0028637	59	90	10	121
78	0.0030709	13	72	9	131
79	0.0029157	11	71	13	131
80	0.0027915	2	55	13	108
81	0.0032263	12	91	13	170
82	0.0032154	16	80	14	144
83	0.0032946	28	92	15	156
84	0.0029403	3	50	13	97
85	0.0031293	6	75	11	144
86	0.0030443	25	72	10	119
87	0.0025805	4	76	18	148
88	0.0033614	31	90	14	149
89	0.0030912	25	86	11	147
90	0.0031498	15	61	8	107
91	0.0031342	22	74	13	126
92	0.0026916	44	80	14	116
93	0.0028403	6	51	12	96
94	0.0032792	20	72	12	124
95	0.0030799	14	77	13	140
96	0.0028242	15	66	19	117
97	0.0030473	0	50	10	100
98	0.0034101	7	72	12	137
99	0.0031272	17	74	11	131
100	0.0028269	29	71	12	113
101	0.0033788	51	94	13	137
102	0.0030033	21	67	10	113
103	0.0029792	8	75	13	142
104	0.0032545	18	76	10	134
105	0.0032848	20	91	15	162
106	0.00283	2	55	12	108
107	0.0031156	3	70	11	137
108	0.0032332	22	73	11	124
109	0.0029132	13	70	10	127
110	0.0031086	14	71	11	128
111	0.0029399	28	80	17	132
112	0.0031943	35	81	12	127
113	0.0032886	27	77	9	127
114	0.0029314	18	74	12	130
115	0.0031498	41	77	10	113
116	0.0031901	3	70	13	137
117	0.0031349	19	73	8	127
118	0.002997	19	75	11	131
119	0.0029557	6	63	10	120
120	0.0032418	2	66	9	130
121	0.0030873	32	77	12	122
122	0.0030898	4	60	12	116
123	0.0028819	10	62	9	114
124	0.0029633	2	58	11	114
125	0.0027935	13	70	14	127
126	0.0028243	8	64	15	120
127	0.0030465	0	67	12	134
128	0.0031522	4	58	11	112
129	0.0031224	15	81	13	147
130	0.0029786	33	76	13	119
131	0.003094	23	68	10	113
132	0.003049	9	64	11	119
133	0.0030673	44	96	13	148
134	0.0030821	31	70	13	109
135	0.0034303	47	95	16	143
136	0.0029152	9	56	10	103
137	0.0036226	31	84	12	137
138	0.0028588	42	77	16	112
139	0.003022	54	94	12	134
140	0.0029819	7	64	11	121
141	0.002816	1	84	18	167
142	0.0029261	23	82	11	141
143	0.002767	22	78	14	134
144	0.0030066	11	78	12	145
145	0.0031551	31	81	16	131
146	0.0031573	12	73	13	134
147	0.002973	26	65	15	104
148	0.0029552	2	59	14	116
149	0.0028669	18	71	15	124
150	0.0028986	21	70	13	119
151	0.0028317	21	74	13	127
152	0.0032232	18	75	15	132
153	0.0031337	14	74	12	134
154	0.0030726	29	80	12	131
155	0.0030234	43	93	13	143
156	0.0029078	43	85	9	127
157	0.0030721	1	69	12	137
158	0.0029141	4	74	13	144
159	0.0032529	41	86	10	131
160	0.0030005	4	60	9	116
161	0.0031385	4	67	14	130
162	0.0033943	22	83	14	144
163	0.0029254	12	66	14	120
164	0.0032768	5	60	12	115
165	0.0030498	43	84	12	125
166	0.0030355	70	110	14	150
167	0.0028164	8	52	13	96
168	0.0031294	14	81	12	148
169	0.0030147	41	86	12	131
170	0.0033433	2	72	16	142
171	0.0029457	30	72	17	114
172	0.0029164	12	63	13	114
173	0.0031976	24	83	15	142
174	0.0029306	7	75	11	143
175	0.0029302	21	85	16	149
176	0.0028751	9	68	15	127
177	0.0030213	28	77	10	126
178	0.0031419	23	71	10	119
179	0.0028832	3	68	13	133
180	0.0029266	21	74	13	127
181	0.0031726	11	64	16	117
182	0.003167	20	64	12	108
183	0.0030818	9	60	13	111
184	0.0030349	18	60	12	102
185	0.0032568	3	67	12	131
186	0.0029177	11	69	15	127
187	0.0032017	0	63	12	126
188	0.0030707	26	71	12	116
189	0.0031485	18	74	11	130
190	0.0032549	28	81	12	134
191	0.003137	8	66	12	124
192	0.0029162	28	83	19	138
193	0.0031762	5	71	12	137
194	0.0030052	8	61	12	114
195	0.0029972	20	71	14	122
196	0.0030219	18	75	11	132
197	0.0029124	13	62	13	111
198	0.0030565	7	66	18	125
199	0.0030827	11	59	14	107
200	0.0026975	21	89	17	157
201	0.0029716	28	78	12	128
202	0.0031032	20	86	14	152
203	0.0029989	14	70	13	126
204	0.0032363	2	74	12	146
205	0.00319	19	73	13	127
206	0.0032762	25	79	13	133
207	0.0029208	23	62	11	101
208	0.0031314	24	69	15	114
209	0.0025746	18	68	13	118
210	0.0027087	7	70	16	133
211	0.0031589	16	72	12	128
212	0.0032497	31	88	18	145
213	0.0030656	14	67	11	120
214	0.0031547	23	74	14	125
215	0.0029547	7	69	9	131
216	0.002912	8	49	10	90
217	0.0028933	6	48	8	90
218	0.0031946	14	74	8	134
219	0.003139	23	84	12	145
220	0.0033596	18	73	13	128
221	0.0030884	11	82	13	153
222	0.0029924	7	66	12	125
223	0.0030844	25	74	14	123
224	0.0029682	19	77	12	135
225	0.003152	13	72	12	131
226	0.0028957	60	88	12	116
227	0.0027866	30	70	17	110
228	0.0036117	9	62	12	115
229	0.0030534	46	83	13	120
230	0.0031084	36	89	12	142
231	0.0029016	3	59	11	115
232	0.0028621	6	64	13	122
233	0.0031138	21	75	11	129
234	0.0029731	15	68	13	121
235	0.0029564	20	70	11	120
236	0.0030745	24	76	13	128
237	0.0030567	21	75	15	129
238	0.0029257	51	91	18	131
239	0.0029692	5	80	18	155
240	0.0030024	36	71	15	106
241	0.0029209	7	69	12	131
242	0.0033142	46	95	12	144
243	0.0029164	21	78	13	135
244	0.0030858	2	62	10	122
245	0.0030232	11	58	10	105
246	0.0031729	16	72	13	128
247	0.0032292	5	66	17	127
248	0.0033535	21	78	18	135
249	0.0031899	27	77	10	127
250	0.0031168	23	76	14	129
251	0.0029243	6	66	11	126
252	0.0031668	43	86	14	129
253	0.0033651	24	80	16	136
254	0.0033396	13	73	11	133
255	0.0031425	15	67	17	119
256	0.0030146	57	98	14	139
257	0.0032429	6	73	13	140
258	0.0029476	28	78	12	128
259	0.0029968	20	75	8	130
260	0.0028381	29	95	16	161
261	0.0034167	44	105	14	166
262	0.0029628	36	80	15	124
263	0.0031605	9	70	12	131
264	0.0029717	23	76	14	129
265	0.0033038	16	77	12	138
266	0.0027664	15	64	11	113
267	0.0028853	14	81	16	148
268	0.0032623	29	93	14	157
269	0.0031434	36	84	13	132
270	0.0029892	35	72	15	109
271	0.0032363	15	79	13	143
272	0.0030063	3	64	16	125
273	0.0030881	47	85	13	123
274	0.002923	39	86	15	133
275	0.0031377	3	63	14	123
276	0.0031869	14	70	12	126
277	0.0031791	28	76	11	124
278	0.0032814	17	79	13	141
279	0.0029273	2	76	9	150
280	0.002846	27	75	11	123
281	0.0029364	8	65	11	122
282	0.0028927	59	85	14	111
283	0.0031535	50	83	12	116
284	0.0029728	26	72	10	118
285	0.0032647	29	84	16	139
286	0.0029263	13	66	17	119
287	0.0032394	44	83	12	122
288	0.0031164	43	84	12	125
289	0.0030936	14	60	9	106
290	0.0031375	0	61	16	122
291	0.0030042	6	72	11	138
292	0.0034151	13	71	11	129
293	0.0031566	25	70	10	115
294	0.0032843	13	68	12	123
295	0.0031912	14	67	9	120
296	0.0026362	6	77	18	148
297	0.0030685	44	89	17	134
298	0.0029864	24	73	14	122
299	0.003091	24	86	18	148
300	0.0030693	17	86	14	155
301	0.0030404	13	76	12	139
302	0.0029582	3	53	8	103
303	0.0031822	19	71	9	123
304	0.0029388	31	83	15	135
305	0.0034105	10	82	12	154
306	0.0031102	27	75	16	123
307	0.0029708	12	65	13	118
308	0.003098	35	94	12	153
309	0.0032575	8	60	8	112
310	0.0031396	27	73	11	119
311	0.0025019	24	72	9	120
312	0.0031821	15	72	13	129
313	0.0033649	7	64	15	121
314	0.0029959	18	73	15	128
315	0.003117	19	69	11	119
316	0.0030807	2	74	16	146
317	0.0030072	7	66	12	125
318	0.003062	29	86	16	143
319	0.0032161	0	51	10	102
320	0.0029025	17	74	13	131
321	0.0032376	36	92	15	148
322	0.0025956	24	84	17	144
323	0.0035195	27	70	11	113
324	0.0029416	18	72	16	126
325	0.0031293	31	85	14	139
326	0.0028907	7	76	10	145
327	0.0032808	15	78	13	141
328	0.0031253	2	57	11	112
329	0.002794	2	60	16	118
330	0.0027449	55	93	14	131
331	0.0031115	6	62	13	118
332	0.003212	22	76	15	130
333	0.0030421	27	74	11	121
334	0.0030415	14	70	12	126
335	0.0029884	9	80	13	151
336	0.0031018	4	70	15	136
337	0.0030908	16	73	13	130
338	0.0032607	4	73	10	142
339	0.0028134	12	60	12	108
340	0.002871	57	87	17	117
341	0.0030206	20	83	17	146
342	0.0034357	16	81	11	146
343	0.0029885	3	66	10	129
344	0.0029976	7	70	15	133
345	0.0029732	2	64	12	126
346	0.0030455	7	69	9	131
347	0.0032413	35	85	9	135
348	0.003156	3	70	14	137
349	0.0030187	44	89	13	134
350	0.0031396	29	70	14	111
351	0.0030643	18	77	16	136
352	0.0030388	14	69	12	124
353	0.0030653	15	75	10	135
354	0.0029301	51	92	14	133
355	0.0029063	37	66	12	95
356	0.0030412	42	102	16	162
357	0.0032144	35	83	12	131
358	0.003198	24	85	14	146
359	0.0031893	12	63	11	114
360	0.0030849	22	69	11	116
361	0.0028175	14	62	11	110
362	0.0030488	16	70	18	124
363	0.0029813	7	64	10	121
364	0.0028772	17	74	17	131
365	0.0030483	13	65	12	117
366	0.0032269	19	65	9	111
367	0.0031727	27	74	13	121
368	0.0030157	2	65	11	128
369	0.0032343	9	69	10	129
370	0.0032144	51	95	14	139
371	0.0031597	6	66	15	126
372	0.0029104	22	76	19	130
373	0.0029071	22	78	12	134
374	0.0031044	18	85	17	152
375	0.0030997	18	68	15	118
376	0.0029538	46	88	13	130
377	0.002989	15	65	9	115
378	0.003152	22	81	17	140
379	0.0033141	39	87	14	135
380	0.0028945	8	61	11	114
381	0.0029141	41	88	15	135
382	0.0031854	59	95	13	131
383	0.0028752	37	80	11	123
384	0.0031973	11	75	11	139
385	0.0029983	48	111	17	174
386	0.0028309	35	75	10	115
387	0.0030987	62	91	12	120
388	0.0030038	37	76	15	115
389	0.0029873	4	77	15	150
390	0.00301	23	76	13	129
391	0.0029378	18	62	15	106
392	0.0030496	25	76	12	127
393	0.0031718	9	63	10	117
394	0.0034722	54	85	10	116
395	0.0029297	9	64	11	119
396	0.0030636	43	82	17	121
397	0.0029737	7	50	9	93
398	0.0030177	12	62	10	112
399	0.0035984	5	74	13	143
400	0.0030451	37	80	13	123
401	0.0029915	1	50	12	99
402	0.0032353	12	79	13	146
403	0.0028419	8	68	17	128
404	0.0028209	25	80	12	135
405	0.002821	16	81	17	146
406	0.0029695	4	56	11	108
407	0.0030189	16	72	16	128
408	0.0030953	9	59	16	109
409	0.0028204	29	84	16	139
410	0.0030979	1	71	18	141
411	0.0031245	2	63	10	124
412	0.0030344	12	71	12	130
413	0.0030539	24	81	9	138
414	0.0029919	12	76	11	140
415	0.0027877	33	81	16	129
416	0.0029402	27	62	13	97
417	0.0029047	55	95	14	135
418	0.0031095	4	59	11	114
419	0.0031507	29	96	17	163
420	0.0033917	1	62	13	123
421	0.0029425	17	60	14	103
422	0.0031692	36	90	10	144
423	0.0029675	11	65	12	119
424	0.0030653	31	85	13	139
425	0.0030388	23	76	12	129
426	0.002996	35	101	15	167
427	0.0032075	17	63	12	109
428	0.0030532	12	81	11	150
429	0.0030629	40	79	12	118
430	0.0029511	45	79	10	113
431	0.0031941	5	70	11	135
432	0.0031079	46	92	19	138
433	0.0035734	13	100	13	187
434	0.0029465	31	73	15	115
435	0.0030095	9	65	13	121
436	0.0028839	4	70	13	136
437	0.0030957	20	69	11	118
438	0.0032281	8	78	11	148
439	0.0027678	7	64	17	121
440	0.0033146	20	76	13	132
441	0.003017	3	53	13	103
442	0.0033924	5	74	11	143
443	0.0030346	2	54	15	106
444	0.0029371	25	75	8	125
445	0.0028445	42	85	18	128
446	0.0028836	11	61	11	111
447	0.0029729	66	109	13	152
448	0.002951	14	66	12	118
449	0.0034823	29	74	12	119
450	0.0029057	8	67	15	126
451	0.0029365	7	55	11	103
452	0.0031952	4	57	11	110
453	0.0029141	6	54	14	102
454	0.0033737	29	97	12	165
455	0.0030055	18	72	10	126
456	0.0030996	8	66	13	124
457	0.0034499	32	97	16	162
458	0.0030609	23	71	11	119
459	0.0028261	17	65	9	113
460	0.0033269	28	92	19	156
461	0.0031539	60	84	10	108
462	0.0028481	2	52	8	102
463	0.0032932	1	65	13	129
464	0.0029365	5	63	14	121
465	0.0031903	11	78	12	145
466	0.0031417	9	58	9	107
467	0.0030419	13	63	10	113
468	0.0031793	23	71	11	119
469	0.00306	7	76	15	145
470	0.0030743	12	68	11	124
471	0.003099	15	75	16	135
472	0.0029915	2	57	10	112
473	0.0031773	2	72	14	142
474	0.0028011	4	73	13	142
475	0.0031362	1	59	16	117
476	0.0030077	26	73	12	120
477	0.0030235	17	70	15	123
478	0.0031349	21	65	10	109
479	0.0032822	9	79	10	149
480	0.0033031	3	59	10	115
481	0.0029694	45	84	12	123
482	0.0029266	18	79	15	140
483	0.0026119	43	88	17	133
484	0.0032072	26	69	13	112
485	0.0029594	19	71	9	123
486	0.0029107	10	69	14	128
487	0.0031915	7	62	12	117
488	0.003117	6	71	17	136
489	0.002835	40	86	14	132
490	0.0030152	10	72	19	134
491	0.0029843	7	72	13	137
492	0.0028685	48	84	18	120
493	0.0030224	17	75	10	133
494	0.0031084	10	71	16	132
495	0.0030926	14	71	16	128
496	0.0030151	5	54	9	103
497	0.0030425	22	56	12	90
498	0.0030744	19	70	13	121
499	0.0031389	29	70	9	111
500	0.0027867	43	96	15	149
501	0.0030421	22	73	14	124
502	0.0034703	41	85	16	129
503	0.0029078	32	83	14	134
504	0.0029383	52	78	11	104
505	0.0028868	82	115	14	148
506	0.0028595	6	86	16	166
507	0.0029642	32	79	16	126
508	0.0029178	15	74	11	133
509	0.0031489	13	66	11	119
510	0.0029603	0	70	10	140
511	0.0028776	37	75	12	113
512	0.0029712	2	80	16	158
513	0.0030538	14	73	17	132
514	0.0029477	35	76	16	117
515	0.0035221	22	79	15	136
516	0.0028576	12	51	7	90
517	0.0031302	17	75	18	133
518	0.0031188	39	96	19	153
519	0.0030327	24	75	16	126
520	0.0029217	9	70	11	131
521	0.0031137	7	68	11	129
522	0.0028489	1	61	9	121
523	0.0032652	63	94	9	125
524	0.0031526	1	67	10	133
525	0.0032945	35	92	14	149
526	0.0028993	14	69	17	124
527	0.0030658	10	73	13	136
528	0.0035357	63	96	15	129
529	0.0031345	43	79	14	115
530	0.00306	14	76	16	138
531	0.0032683	8	71	13	134
532	0.0030348	21	80	17	139
533	0.0030372	19	63	9	107
534	0.0030264	45	96	14	147
535	0.0030337	14	77	12	140
536	0.0032659	9	80	16	151
537	0.003236	22	86	13	150
538	0.0030588	13	68	15	123
539	0.0030931	12	75	15	138
540	0.002856	28	75	12	122
541	0.0029847	12	65	12	118
542	0.0032011	24	77	13	130
543	0.0032056	4	64	14	124
544	0.0026765	58	98	19	138
545	0.0031009	16	76	12	136
546	0.0029112	1	63	11	125
547	0.0032622	11	70	9	129
548	0.0028063	31	75	12	119
549	0.0029206	13	75	10	137
550	0.003023	7	74	10	141
551	0.0029699	22	70	10	118
552	0.0032076	6	76	18	146
553	0.003062	2	60	13	118
554	0.0028888	10	69	8	128
555	0.0029389	39	89	16	139
556	0.0027902	9	65	11	121
557	0.0031061	23	73	12	123
558	0.0028867	17	73	11	129
559	0.0032247	31	72	13	113
560	0.0030614	31	80	11	129
561	0.0029155	20	68	10	116
562	0.0028823	64	106	18	148
563	0.0032724	43	97	19	151
564	0.0030245	20	78	15	136
565	0.0028367	5	59	18	113
566	0.0028732	25	85	13	145
567	0.0031238	55	95	11	135
568	0.0029948	8	76	11	144
569	0.00309	20	69	14	118
570	0.0029635	6	66	14	126
571	0.0031273	9	60	17	111
572	0.0030801	20	73	8	126
573	0.0029181	21	74	14	127
574	0.0034405	33	96	15	159
575	0.0031426	42	81	13	120
576	0.0030516	0	60	11	120
577	0.0030234	39	101	18	163
578	0.0032434	6	61	18	116
579	0.0030105	25	75	19	125
580	0.0029104	37	91	12	145
581	0.0030981	31	91	13	151
582	0.0030089	23	63	17	103
583	0.0031401	2	69	13	136
584	0.0030698	46	86	11	126
585	0.0030732	9	70	11	131
586	0.0031395	2	59	12	116
587	0.0029556	15	72	12	129
588	0.0028915	12	68	14	124
589	0.0030331	7	78	10	149
590	0.0028753	49	96	19	143
591	0.0028967	0	62	16	124
592	0.0032828	23	82	19	141
593	0.0031751	1	73	12	145
594	0.0029099	14	73	11	132
595	0.0032196	20	76	14	132
596	0.0034049	17	76	13	135
597	0.0027897	18	55	13	92
598	0.0029251	1	61	16	121
599	0.0028658	7	65	10	123
600	0.0030135	2	65	15	128
601	0.0029161	46	89	15	132
602	0.0026819	8	70	19	132
603	0.003282	12	74	12	136
604	0.0032236	45	84	15	123
605	0.0028676	2	77	15	152
606	0.00322	40	90	11	140
607	0.0029046	1	57	10	113
608	0.0030132	56	95	13	134
609	0.0032263	29	93	15	157
610	0.0032324	36	88	12	140
611	0.003185	5	66	9	127
612	0.0028422	21	79	12	137
613	0.0031147	55	96	13	137
614	0.0026244	24	74	15	124
615	0.0029698	4	51	11	98
616	0.0026672	65	94	11	123
617	0.0036097	15	88	10	161
618	0.0031501	65	104	13	143
619	0.0031407	45	79	13	113
620	0.0033964	30	81	13	132
621	0.0029091	14	68	10	122
622	0.0029919	12	70	16	128
623	0.0032223	2	66	13	130
624	0.0026897	12	68	10	124
625	0.0030563	0	54	12	108
626	0.0029424	26	81	12	136
627	0.0028466	11	70	18	129
628	0.0031976	43	82	9	121
629	0.0029518	24	69	8	114
630	0.0032484	44	87	14	130
631	0.0034174	15	62	11	109
632	0.0028214	2	66	11	130
633	0.0029558	63	105	15	147
634	0.0029095	11	68	11	125
635	0.0032128	20	80	13	140
636	0.0030737	8	62	15	116
637	0.0035638	32	78	12	124
638	0.0029983	29	72	13	115
639	0.0029587	0	73	17	146
640	0.0030568	20	56	9	92
641	0.0031596	48	81	11	114
642	0.0032888	17	87	15	157
643	0.0028977	19	68	14	117
644	0.0029132	8	62	12	116
645	0.0029293	19	63	9	107
646	0.0028107	17	62	9	107
647	0.0032895	1	51	10	101
648	0.0030462	21	78	17	135
649	0.0032312	37	86	15	135
650	0.0029259	2	55	11	108
651	0.0030835	24	70	12	116
652	0.0032439	4	71	11	138
653	0.0029074	1	68	12	135
654	0.0031654	48	101	11	154
655	0.0031452	27	82	18	137
656	0.0031401	8	78	13	148
657	0.0028697	60	91	16	122
658	0.0032696	20	81	11	142
659	0.0032027	10	69	12	128
660	0.0029768	18	68	11	118
661	0.0032082	15	70	16	125
662	0.0029664	11	64	10	117
663	0.0028438	15	73	12	131
664	0.002967	55	92	16	129
665	0.0031888	21	73	12	125
666	0.0028557	9	59	11	109
667	0.0033201	17	84	17	151
668	0.0030504	15	68	11	121
669	0.0031706	37	84	13	131
670	0.0030476	15	89	12	163
671	0.003084	39	77	9	115
672	0.0030972	43	81	11	119
673	0.0032323	12	67	12	122
674	0.0030945	26	87	12	148
675	0.0032606	38	79	19	120
676	0.002643	23	91	11	159
677	0.0031631	12	65	14	118
678	0.0031478	6	74	12	142
679	0.0031001	18	68	12	118
680	0.0030767	28	82	11	136
681	0.0031925	26	70	8	114
682	0.0029592	12	77	15	142
683	0.0029647	26	91	13	156
684	0.0030074	21	69	14	117
685	0.0033306	52	87	11	122
686	0.0029498	25	74	12	123
687	0.0029467	34	83	12	132
688	0.0028539	10	67	11	124
689	0.0034948	42	92	15	142
690	0.0029867	47	83	14	119
691	0.0028655	19	68	14	117
692	0.003053	1	56	11	111
693	0.0026085	3	59	16	115
694	0.0030384	9	67	13	125
695	0.003122	4	81	13	158
696	0.00312	9	56	9	103
697	0.0030769	17	67	10	117
698	0.0031572	5	64	15	123
699	0.0031163	1	51	10	101
700	0.0028913	5	68	14	131
701	0.0030291	0	60	9	120
702	0.0030223	40	78	10	116
703	0.0031154	36	77	15	118
704	0.0030628	28	82	16	136
705	0.0028749	1	75	13	149
706	0.0030607	7	66	16	125
707	0.00293	24	76	16	128
708	0.0032619	10	79	14	148
709	0.0031983	14	64	9	114
710	0.0031479	28	82	13	136
711	0.0029568	38	96	16	154
712	0.0034972	16	66	10	116
713	0.0030748	24	72	18	120
714	0.003219	5	67	14	129
715	0.003258	17	78	13	139
716	0.0028961	19	68	17	117
717	0.00308	46	89	13	132
718	0.002777	1	50	12	99
719	0.0028392	0	55	12	110
720	0.0030056	42	92	11	142
721	0.0032783	47	104	12	161
722	0.0029539	12	66	10	120
723	0.0030674	19	82	18	145
724	0.0030073	9	70	13	131
725	0.0032607	14	71	14	128
726	0.0030232	12	69	13	126
727	0.0029173	28	91	15	154
728	0.0030614	1	68	9	135
729	0.0027286	75	110	19	145
730	0.0031009	13	81	12	149
731	0.0030771	16	72	10	128
732	0.0029604	31	78	13	125
733	0.0031517	15	61	10	107
734	0.0029609	36	76	16	116
735	0.003186	10	60	8	110
736	0.0027203	19	81	13	143
737	0.0028962	3	69	13	135
738	0.0029295	42	91	11	140
739	0.0031418	5	67	13	129
740	0.00295	35	73	16	111
741	0.0028733	39	85	16	131
742	0.0030275	27	70	11	113
743	0.0032308	25	78	12	131
744	0.0031012	14	67	12	120
745	0.0030429	48	95	13	142
746	0.0031862	11	70	11	129
747	0.0029933	5	68	14	131
748	0.0030722	59	98	14	137
749	0.0030307	2	65	12	128
750	0.0029598	25	83	12	141
751	0.0030926	7	65	11	123
752	0.0030958	11	72	14	133
753	0.0026971	73	100	16	127
754	0.0029917	18	64	11	110
755	0.0031551	22	70	11	118
756	0.0029605	16	68	10	120
757	0.0030639	3	59	9	115
758	0.0030679	20	67	13	114
759	0.0030375	0	66	12	132
760	0.0032158	8	68	11	128
761	0.0031557	31	87	15	143
762	0.0031223	21	84	13	147
763	0.0030347	16	75	14	134
764	0.0032233	47	84	14	121
765	0.0032259	7	67	15	127
766	0.0030659	12	69	18	126
767	0.0032778	8	64	10	120
768	0.0028757	7	80	13	153
769	0.003004	2	71	13	140
770	0.0031163	20	66	9	112
771	0.0030433	60	104	15	148
772	0.0029011	7	66	14	125
773	0.0030509	18	75	9	132
774	0.0031973	14	76	14	138
775	0.0030152	16	67	10	118
776	0.0029361	39	89	15	139
777	0.0029681	37	80	16	123
778	0.0030626	29	77	11	125
779	0.0030679	12	77	14	142
780	0.0032192	14	83	14	152
781	0.0029784	22	71	11	120
782	0.0031245	9	70	12	131
783	0.0030624	11	77	13	143
784	0.0028342	12	72	10	132
785	0.0031208	21	85	12	149
786	0.0031413	29	80	14	131
787	0.0029658	12	55	14	98
788	0.0031058	20	79	15	138
789	0.0031732	27	74	13	121
790	0.0028775	7	60	11	113
791	0.0028335	11	66	13	121
792	0.0033226	3	80	12	157
793	0.0030496	4	67	15	130
794	0.0026684	35	91	11	147
795	0.0029179	14	77	10	140
796	0.0031857	5	74	15	143
797	0.0027698	30	66	11	102
798	0.0029627	21	72	9	123
799	0.0029287	23	76	15	129
800	0.0028916	8	73	13	138
801	0.0029833	5	51	12	97
802	0.0032302	14	65	11	116
803	0.0029873	8	54	15	100
804	0.0031203	3	68	15	133
805	0.0031163	39	96	13	153
806	0.0033232	32	87	15	142
807	0.0027098	48	94	16	140
808	0.0032484	9	62	13	115
809	0.0029853	4	58	11	112
810	0.0029112	18	64	17	110
811	0.002989	16	70	15	124
812	0.0032479	11	72	8	133
813	0.0029297	19	70	9	121
814	0.0033238	74	102	15	130
815	0.0030967	3	76	10	149
816	0.0031966	4	62	15	120
817	0.0030326	21	79	15	137
818	0.003169	17	77	16	137
819	0.0027332	14	60	15	106
820	0.0030647	8	59	17	110
821	0.0030222	36	79	12	122
822	0.0031608	47	103	13	159
823	0.0030123	14	65	10	116
824	0.0031339	38	86	12	134
825	0.0030127	4	59	11	114
826	0.0029547	16	82	12	148
827	0.0027944	48	91	19	134
828	0.0029855	8	68	11	128
829	0.0030974	45	92	14	139
830	0.0028131	9	64	14	119
831	0.0029114	24	83	12	142
832	0.003202	53	99	12	145
833	0.0030245	12	81	16	150
834	0.0028854	8	63	12	118
835	0.0032922	3	69	8	135
836	0.0031286	24	67	9	110
837	0.0032014	2	73	14	144
838	0.0030469	34	79	12	124
839	0.0032599	4	71	10	138
840	0.0030161	32	87	12	142
841	0.0031338	13	63	11	113
842	0.0031103	11	79	13	147
843	0.0033014	6	65	11	124
844	0.0028716	21	76	15	131
845	0.0030596	1	67	12	133
846	0.0030659	6	65	9	124
847	0.0033524	27	98	18	169
848	0.0029467	3	65	12	127
849	0.0032239	23	68	10	113
850	0.0030117	8	77	14	146
851	0.002909	11	73	13	135
852	0.003307	7	58	9	109
853	0.0029824	25	73	17	121
854	0.0032762	18	84	13	150
855	0.0031026	13	73	14	133
856	0.0031944	34	81	11	128
857	0.0030651	2	70	10	138
858	0.0031579	6	61	9	116
859	0.0029643	54	93	14	132
860	0.0031927	28	88	13	148
861	0.003151	4	74	11	144
862	0.0030933	5	58	10	111
863	0.0028409	29	88	16	147
864	0.0030929	46	88	16	130
865	0.0036258	37	94	16	151
866	0.0030787	47	86	12	125
867	0.0026719	7	61	18	115
868	0.0032189	4	69	17	134
869	0.0029265	9	73	15	137
870	0.0031597	19	67	11	115
871	0.003024	4	57	16	110
872	0.0031385	10	71	17	132
873	0.0031266	11	77	10	143
874	0.0029623	2	70	15	138
875	0.0033258	1	54	12	107
876	0.0030152	31	72	13	113
877	0.002964	21	74	10	127
878	0.0030604	2	66	10	130
879	0.0030015	55	101	16	147
880	0.003095	28	72	11	116
881	0.003041	13	74	11	135
882	0.0030233	41	83	16	125
883	0.00323	6	68	17	130
884	0.0030354	11	70	10	129
885	0.0028711	12	79	17	146
886	0.0028838	47	78	13	109
887	0.0031135	51	87	11	123
888	0.0038399	4	57	12	110
889	0.00309	14	75	9	136
890	0.0031232	11	74	13	137
891	0.0029527	36	72	14	108
892	0.0029982	13	61	19	109
893	0.0029394	12	63	11	114
894	0.0027674	17	75	16	133
895	0.0030432	12	71	12	130
896	0.0032394	55	90	12	125
897	0.0029651	4	62	10	120
898	0.0031633	7	77	11	147
899	0.0029905	17	85	11	153
900	0.0031071	23	67	12	111
901	0.0030291	4	58	11	112
902	0.0028473	13	77	17	141
903	0.0030093	5	74	13	143
904	0.0032418	26	70	11	114
905	0.0029931	13	67	14	121
906	0.0029619	28	86	12	144
907	0.0028542	14	61	11	108
908	0.0034399	1	66	10	131
909	0.0033124	11	67	16	123
910	0.0031142	16	72	14	128
911	0.0031511	8	58	12	108
912	0.0030856	21	69	14	117
913	0.0028366	34	76	11	118
914	0.0027643	3	56	13	109
915	0.0029751	25	81	13	137
916	0.0030171	8	78	12	148
917	0.0029765	9	75	15	141
918	0.0028421	2	62	13	122
919	0.0033324	10	78	16	146
920	0.0030088	14	72	14	130
921	0.0032059	13	79	10	145
922	0.0031375	17	70	10	123
923	0.0027981	30	72	9	114
924	0.0029322	5	49	7	93
925	0.0031534	2	69	12	136
926	0.0031914	24	77	11	130
927	0.0029324	8	83	12	158
928	0.003116	33	79	12	125
929	0.0026249	2	65	13	128
930	0.0029408	14	67	10	120
931	0.0032454	5	70	10	135
932	0.0032067	54	91	16	128
933	0.0034417	14	72	12	130
934	0.0028526	4	61	9	118
935	0.0030078	26	81	14	136
936	0.0031871	14	79	15	144
937	0.0031102	2	67	11	132
938	0.00303	25	66	14	107
939	0.0033732	21	75	15	129
940	0.0028237	12	78	17	144
941	0.0032146	8	72	13	136
942	0.0029162	19	83	18	147
943	0.0030391	60	101	12	142
944	0.0028677	35	89	16	143
945	0.0029747	4	70	13	136
946	0.0031603	32	97	11	162
947	0.0030856	7	69	13	131
948	0.0030638	13	89	14	165
949	0.0029534	6	62	12	118
950	0.0030663	12	62	12	112
951	0.003026	14	69	11	124
952	0.0034833	30	95	17	160
953	0.003215	70	104	15	138
954	0.0030546	15	59	9	103
955	0.0031519	11	74	11	137
956	0.0031229	30	78	14	126
957	0.0030972	13	77	13	141
958	0.0031449	8	64	14	120
959	0.0031467	16	67	13	118
960	0.0033855	3	69	13	135
961	0.0030155	9	65	12	121
962	0.0029129	13	71	13	129
963	0.0031779	54	96	13	138
964	0.0030317	5	70	11	135
965	0.0030096	14	82	16	150
966	0.003412	30	89	12	148
967	0.003101	9	66	10	123
968	0.0030777	9	64	9	119
969	0.0030106	6	65	18	124
970	0.0032912	27	78	17	129
971	0.002861	44	81	12	118
972	0.003137	38	80	11	122
973	0.0032657	17	72	14	127
974	0.0031629	19	70	11	121
975	0.0030268	37	86	10	135
976	0.0031744	13	70	13	127
977	0.0029293	16	71	15	126
978	0.002982	21	72	19	123
979	0.0028969	5	57	13	109
980	0.0030172	41	89	11	137
981	0.0030716	39	94	11	149
982	0.0030055	22	74	14	126
983	0.0029933	40	80	10	120
984	0.0032335	1	68	13	135
985	0.0027929	7	77	17	147
986	0.0029091	8	73	19	138
987	0.0030522	17	68	10	119
988	0.0027883	32	79	18	126
989	0.0030231	8	55	8	102
990	0.0030517	23	82	12	141
991	0.0030837	51	78	12	105
992	0.0032124	16	64	11	112
993	0.0031077	37	85	19	133
994	0.0031294	3	70	13	137
995	0.0029293	8	79	15	150
996	0.0034083	22	80	13	138
997	0.0030626	37	78	17	119
998	0.0033103	18	80	12	142
999	0.0030782	8	74	19	140
mean	0.00306033	19.932	74.286	12.927	128.64

## Sheet: PolyMin_Bal
	time	SEq	Bal	Reg	Egal
0	0.0031107	36	77	19	118
1	0.0030389	8	64	18	120
2	0.0031084	15	76	17	137
3	0.0029838	59	98	11	137
4	0.0029673	50	94	17	138
5	0.0028858	8	70	17	132
6	0.0030684	6	78	15	150
7	0.0028336	19	75	11	131
8	0.0030141	15	70	11	125
9	0.0032903	2	59	10	116
10	0.0028456	28	92	16	156
11	0.0028313	11	79	12	147
12	0.0031084	54	94	18	134
13	0.0028318	10	58	14	106
14	0.0029343	1	59	11	117
15	0.0030233	24	69	10	114
16	0.0029531	19	79	14	139
17	0.0032142	14	69	16	124
18	0.0029289	5	73	17	141
19	0.0028902	11	68	11	125
20	0.003161	8	73	16	138
21	0.0025646	34	79	9	124
22	0.0030308	35	90	15	145
23	0.0029315	4	63	9	122
24	0.0030014	10	74	10	138
25	0.0032867	14	84	16	154
26	0.0031809	33	86	17	139
27	0.003091	10	59	12	108
28	0.0028769	15	60	11	105
29	0.0029448	6	67	10	128
30	0.002742	10	70	16	130
31	0.0031258	12	65	14	118
32	0.0031781	43	80	14	117
33	0.0028692	25	81	11	137
34	0.0029014	24	70	9	116
35	0.0030536	21	71	14	121
36	0.0029738	5	65	17	125
37	0.0031204	21	70	13	119
38	0.0029396	19	64	9	109
39	0.0029592	10	73	12	136
40	0.0030425	5	68	12	131
41	0.0033243	79	108	11	137
42	0.0033079	17	66	11	115
43	0.0027051	34	73	15	112
44	0.0031197	30	88	13	146
45	0.0028271	47	88	13	129
46	0.0029951	76	99	13	122
47	0.0032447	26	85	14	144
48	0.0030944	25	77	10	129
49	0.0032161	20	75	12	130
50	0.0031567	13	73	13	133
51	0.0031279	17	66	14	115
52	0.0031096	41	76	11	111
53	0.0028506	22	67	11	112
54	0.0032033	12	55	8	98
55	0.002971	20	62	13	104
56	0.0028959	2	78	12	154
57	0.0034663	37	83	14	129
58	0.003146	3	65	11	127
59	0.0032792	8	83	16	158
60	0.0032082	22	86	17	150
61	0.0030294	2	63	14	124
62	0.0030946	4	82	13	160
63	0.0029929	23	64	18	105
64	0.0031846	11	73	13	135
65	0.0028712	4	58	8	112
66	0.0030812	6	58	13	110
67	0.0033801	1	59	12	117
68	0.0033513	3	78	16	153
69	0.0033892	19	71	9	123
70	0.0029544	21	74	16	127
71	0.0030931	7	70	17	133
72	0.0031468	10	68	11	126
73	0.0030709	28	76	18	124
74	0.0030969	9	64	13	119
75	0.0031585	43	77	12	111
76	0.0032102	17	80	10	143
77	0.003085	59	90	10	121
78	0.0029878	13	72	9	131
79	0.0029103	11	71	13	131
80	0.002746	2	55	13	108
81	0.0031859	12	91	13	170
82	0.0032135	16	80	14	144
83	0.0032465	28	92	15	156
84	0.0029445	3	50	13	97
85	0.0032083	6	75	11	144
86	0.0027873	25	72	10	119
87	0.0026969	4	76	18	148
88	0.003167	31	90	14	149
89	0.0030599	25	86	11	147
90	0.0030006	15	61	8	107
91	0.0032098	22	74	13	126
92	0.0025508	44	80	14	116
93	0.0028089	6	51	12	96
94	0.0033583	31	71	14	111
95	0.0032831	14	77	13	140
96	0.0029095	15	66	19	117
97	0.002927	0	50	10	100
98	0.0037384	7	72	12	137
99	0.0031275	17	74	11	131
100	0.0030144	29	71	12	113
101	0.0030636	51	94	13	137
102	0.003001	21	67	10	113
103	0.0028867	8	75	13	142
104	0.0030721	18	76	10	134
105	0.0033046	22	81	16	140
106	0.0028763	2	55	12	108
107	0.0030986	3	70	11	137
108	0.0031457	27	72	18	117
109	0.0029102	13	70	10	127
110	0.0030468	14	71	11	128
111	0.0030573	28	80	17	132
112	0.0031353	35	81	12	127
113	0.0032561	27	77	9	127
114	0.0029106	18	74	12	130
115	0.0029377	41	77	10	113
116	0.0032179	3	70	13	137
117	0.0031824	19	73	8	127
118	0.0032198	19	75	11	131
119	0.0030397	6	63	10	120
120	0.0032492	2	66	9	130
121	0.0031684	32	77	12	122
122	0.0033231	4	60	12	116
123	0.0029944	10	62	9	114
124	0.0029176	2	58	11	114
125	0.0028891	13	70	14	127
126	0.0029319	8	64	15	120
127	0.0031389	0	67	12	134
128	0.0030775	4	58	11	112
129	0.0030247	15	81	13	147
130	0.0028726	33	76	13	119
131	0.0028608	23	68	10	113
132	0.0030167	9	64	11	119
133	0.0030165	44	96	13	148
134	0.0029612	31	70	13	109
135	0.0033539	47	95	16	143
136	0.0029213	9	56	10	103
137	0.0033018	31	84	12	137
138	0.0028737	42	77	16	112
139	0.0029701	54	94	12	134
140	0.0028214	7	64	11	121
141	0.00296	11	83	19	155
142	0.0037669	23	82	11	141
143	0.0031055	22	78	14	134
144	0.0032928	11	78	12	145
145	0.0030925	31	81	16	131
146	0.0033239	12	73	13	134
147	0.003104	26	65	15	104
148	0.0028553	2	59	14	116
149	0.0028963	18	71	15	124
150	0.0029623	21	70	13	119
151	0.0029491	21	74	13	127
152	0.0030762	18	75	15	132
153	0.0029963	14	74	12	134
154	0.0029996	29	80	12	131
155	0.0031439	43	93	13	143
156	0.0030038	43	85	9	127
157	0.0030434	1	69	12	137
158	0.0030578	4	74	13	144
159	0.0032855	41	86	10	131
160	0.002958	4	60	9	116
161	0.0030326	4	67	14	130
162	0.0034041	22	83	14	144
163	0.0031003	12	66	14	120
164	0.0029468	5	60	12	115
165	0.0030602	43	84	12	125
166	0.0030504	70	110	14	150
167	0.0026917	8	52	13	96
168	0.0032183	28	77	12	126
169	0.0029936	41	86	12	131
170	0.0029175	2	72	16	142
171	0.0029503	30	72	17	114
172	0.00296	12	63	13	114
173	0.0033159	24	83	15	142
174	0.002986	7	75	11	143
175	0.0030055	21	85	16	149
176	0.0032379	9	68	15	127
177	0.0030476	28	77	10	126
178	0.003062	23	71	10	119
179	0.0028304	3	68	13	133
180	0.0028421	21	74	13	127
181	0.0030229	11	64	16	117
182	0.0029831	20	64	12	108
183	0.0029629	9	60	13	111
184	0.0029239	18	60	12	102
185	0.0030126	3	67	12	131
186	0.0029342	11	69	15	127
187	0.0029759	0	63	12	126
188	0.003083	26	71	12	116
189	0.003291	18	74	11	130
190	0.0031944	28	81	12	134
191	0.0031166	8	66	12	124
192	0.0028651	28	83	19	138
193	0.0032677	5	71	12	137
194	0.0030776	8	61	12	114
195	0.0030128	20	71	14	122
196	0.002958	18	75	11	132
197	0.0028985	13	62	13	111
198	0.0029565	7	66	18	125
199	0.0028829	11	59	14	107
200	0.0026041	21	89	17	157
201	0.0028594	28	78	12	128
202	0.0031407	20	86	14	152
203	0.0030335	14	70	13	126
204	0.0031792	2	74	12	146
205	0.0035505	19	73	13	127
206	0.0032292	25	79	13	133
207	0.0028487	23	62	11	101
208	0.0033079	24	69	15	114
209	0.0026442	18	68	13	118
210	0.0026435	7	70	16	133
211	0.0029919	16	72	12	128
212	0.003319	31	88	18	145
213	0.002936	14	67	11	120
214	0.0031784	23	74	14	125
215	0.003079	7	69	9	131
216	0.0031925	8	49	10	90
217	0.0028494	6	48	8	90
218	0.0033211	14	74	8	134
219	0.0032756	23	84	12	145
220	0.0033813	18	73	13	128
221	0.0031634	11	82	13	153
222	0.0028443	7	66	12	125
223	0.0030539	25	74	14	123
224	0.0029273	19	77	12	135
225	0.0030655	13	72	12	131
226	0.0028247	60	88	12	116
227	0.0028522	30	70	17	110
228	0.0030714	9	62	12	115
229	0.0028869	46	83	13	120
230	0.002875	36	89	12	142
231	0.0029165	3	59	11	115
232	0.0031979	6	64	13	122
233	0.0029237	21	75	11	129
234	0.0029745	15	68	13	121
235	0.0030888	20	70	11	120
236	0.0028958	24	76	13	128
237	0.0031677	21	75	15	129
238	0.0030795	51	91	18	131
239	0.002906	5	80	18	155
240	0.0030091	36	71	15	106
241	0.0031288	7	69	12	131
242	0.0032042	46	95	12	144
243	0.0031428	21	78	13	135
244	0.0030872	2	62	10	122
245	0.002973	11	58	10	105
246	0.0028534	16	72	13	128
247	0.0029932	5	66	17	127
248	0.0033735	21	78	18	135
249	0.0030366	27	77	10	127
250	0.0030823	23	76	14	129
251	0.0028128	6	66	11	126
252	0.002925	43	86	14	129
253	0.0033287	24	80	16	136
254	0.0033873	13	73	11	133
255	0.0030933	15	67	17	119
256	0.0030101	57	98	14	139
257	0.003085	6	73	13	140
258	0.0030826	28	78	12	128
259	0.0030851	20	75	8	130
260	0.0028679	29	95	16	161
261	0.0034415	44	105	14	166
262	0.0029152	36	80	15	124
263	0.0030652	9	70	12	131
264	0.0030165	23	76	14	129
265	0.0032231	16	77	12	138
266	0.0032368	15	64	11	113
267	0.0027512	14	81	16	148
268	0.003062	29	93	14	157
269	0.0029407	36	84	13	132
270	0.0029835	35	72	15	109
271	0.0032879	15	79	13	143
272	0.0032393	3	64	16	125
273	0.0031403	47	85	13	123
274	0.0037821	39	86	15	133
275	0.0030089	3	63	14	123
276	0.003066	14	70	12	126
277	0.0031698	28	76	11	124
278	0.0031191	17	79	13	141
279	0.0029277	2	76	9	150
280	0.0027524	27	75	11	123
281	0.0031365	8	65	11	122
282	0.0028754	59	85	14	111
283	0.0031372	50	83	12	116
284	0.0031305	26	72	10	118
285	0.0038351	29	84	16	139
286	0.0028764	13	66	17	119
287	0.0031117	44	83	12	122
288	0.0030898	43	84	12	125
289	0.0029246	16	59	15	102
290	0.0031766	0	61	16	122
291	0.0030541	6	72	11	138
292	0.0034318	13	71	11	129
293	0.0031012	25	70	10	115
294	0.0032146	13	68	12	123
295	0.0034297	14	67	9	120
296	0.0026449	6	77	18	148
297	0.0030115	44	89	17	134
298	0.0027913	24	73	14	122
299	0.0029707	25	81	18	137
300	0.0030876	17	86	14	155
301	0.0030774	13	76	12	139
302	0.0029377	3	53	8	103
303	0.002833	19	71	9	123
304	0.002915	31	83	15	135
305	0.0031183	10	82	12	154
306	0.003199	27	75	16	123
307	0.0030236	12	65	13	118
308	0.0031509	35	94	12	153
309	0.0033017	8	60	8	112
310	0.0032121	27	73	11	119
311	0.0026401	24	72	9	120
312	0.003076	15	72	13	129
313	0.003193	7	64	15	121
314	0.0029745	18	70	17	122
315	0.0031281	19	69	11	119
316	0.0032523	2	74	16	146
317	0.0029371	7	66	12	125
318	0.0032776	29	86	16	143
319	0.0030082	0	51	10	102
320	0.0028998	17	74	13	131
321	0.003208	36	92	15	148
322	0.0026339	24	84	17	144
323	0.0030158	27	70	11	113
324	0.0028137	18	72	16	126
325	0.0031288	31	85	14	139
326	0.0029028	7	76	10	145
327	0.0032247	15	78	13	141
328	0.0029509	2	57	11	112
329	0.0028497	2	60	16	118
330	0.0029215	55	93	14	131
331	0.0032945	6	62	13	118
332	0.0033952	22	76	15	130
333	0.0030305	27	74	11	121
334	0.0031259	14	70	12	126
335	0.0032352	9	80	13	151
336	0.0030694	4	70	15	136
337	0.0029528	16	73	13	130
338	0.0032466	4	73	10	142
339	0.002843	12	60	12	108
340	0.0029756	57	87	17	117
341	0.0032233	20	83	17	146
342	0.0034948	16	81	11	146
343	0.0028836	3	66	10	129
344	0.00313	7	70	15	133
345	0.0029794	2	64	12	126
346	0.003089	7	69	9	131
347	0.0032022	35	85	9	135
348	0.0031996	3	70	14	137
349	0.0030305	44	89	13	134
350	0.0031099	29	70	14	111
351	0.0031888	18	77	16	136
352	0.0031023	14	69	12	124
353	0.0031396	15	75	10	135
354	0.002975	51	92	14	133
355	0.0032238	37	66	12	95
356	0.0029803	42	102	16	162
357	0.0032655	35	83	12	131
358	0.0031371	24	85	14	146
359	0.0030984	12	63	11	114
360	0.0030206	22	69	11	116
361	0.0030931	14	61	12	108
362	0.0030282	16	70	18	124
363	0.0028841	7	64	10	121
364	0.0028913	17	74	17	131
365	0.0031964	13	65	12	117
366	0.0030816	19	65	9	111
367	0.0032102	27	74	13	121
368	0.0029132	2	65	11	128
369	0.0032851	9	69	10	129
370	0.0031897	51	95	14	139
371	0.0035067	6	66	15	126
372	0.0027858	22	76	19	130
373	0.0030523	22	78	12	134
374	0.003034	18	85	17	152
375	0.0033471	18	68	15	118
376	0.0028273	46	88	13	130
377	0.0027196	15	65	9	115
378	0.0030524	22	81	17	140
379	0.0032039	39	87	14	135
380	0.0027655	8	61	11	114
381	0.002825	41	88	15	135
382	0.0033771	59	95	13	131
383	0.0030354	37	80	11	123
384	0.0030914	11	75	11	139
385	0.002986	48	111	17	174
386	0.0027925	35	75	10	115
387	0.0028834	62	91	12	120
388	0.0028935	37	76	15	115
389	0.0028271	4	77	15	150
390	0.0031488	23	76	13	129
391	0.0027647	18	62	15	106
392	0.0030394	25	76	12	127
393	0.0030928	9	63	10	117
394	0.0031163	54	85	10	116
395	0.0028517	9	64	11	119
396	0.0028317	43	82	17	121
397	0.0029213	7	50	9	93
398	0.0030048	12	62	10	112
399	0.0028678	5	74	13	143
400	0.0030278	37	80	13	123
401	0.0029937	1	50	12	99
402	0.0032129	12	79	13	146
403	0.0029274	8	68	17	128
404	0.0027904	25	80	12	135
405	0.0027831	16	81	17	146
406	0.0031106	4	56	11	108
407	0.0030862	16	72	16	128
408	0.003129	9	59	16	109
409	0.0030146	29	84	16	139
410	0.0031511	1	71	18	141
411	0.0030896	2	63	10	124
412	0.0030561	12	71	12	130
413	0.0028928	24	81	9	138
414	0.0030653	12	76	11	140
415	0.0029546	33	81	16	129
416	0.0028199	27	62	13	97
417	0.0029527	55	95	14	135
418	0.0031686	4	59	11	114
419	0.0031655	29	96	17	163
420	0.0032873	1	62	13	123
421	0.0033041	17	60	14	103
422	0.0032632	36	90	10	144
423	0.0032731	11	65	12	119
424	0.0030653	31	85	13	139
425	0.0031019	23	76	12	129
426	0.0028542	35	101	15	167
427	0.0031061	17	63	12	109
428	0.0031133	12	81	11	150
429	0.003108	40	79	12	118
430	0.0029841	45	79	10	113
431	0.0031818	7	69	13	131
432	0.0030675	46	92	19	138
433	0.0031213	13	100	13	187
434	0.0031728	31	73	15	115
435	0.0029964	9	65	13	121
436	0.002789	4	70	13	136
437	0.0028894	20	69	11	118
438	0.0032774	8	78	11	148
439	0.0030052	7	64	17	121
440	0.0030716	20	76	13	132
441	0.0029936	3	53	13	103
442	0.0030067	5	74	11	143
443	0.0028537	2	54	15	106
444	0.0029474	25	75	8	125
445	0.002746	42	85	18	128
446	0.0028595	11	61	11	111
447	0.0030572	66	109	13	152
448	0.0029021	14	66	12	118
449	0.0032115	29	74	12	119
450	0.0028891	8	67	15	126
451	0.0029283	7	55	11	103
452	0.0031843	4	57	11	110
453	0.0030132	6	54	14	102
454	0.0033573	36	93	12	150
455	0.0030377	18	72	10	126
456	0.0029719	8	66	13	124
457	0.0033045	32	97	16	162
458	0.0029849	23	71	11	119
459	0.0030962	17	65	9	113
460	0.0031991	28	92	19	156
461	0.0029862	60	84	10	108
462	0.002945	2	52	8	102
463	0.0029785	1	65	13	129
464	0.0030627	5	63	14	121
465	0.0029247	11	78	12	145
466	0.0029939	9	58	9	107
467	0.002949	13	63	10	113
468	0.0033137	23	71	11	119
469	0.0030675	7	76	15	145
470	0.0030198	12	68	11	124
471	0.0030915	15	75	16	135
472	0.0030053	2	57	10	112
473	0.0029723	2	72	14	142
474	0.0027985	4	73	13	142
475	0.0028103	1	59	16	117
476	0.0029318	26	73	12	120
477	0.0030494	17	70	15	123
478	0.0030992	21	65	10	109
479	0.0033304	9	79	10	149
480	0.0032303	3	59	10	115
481	0.0028696	45	84	12	123
482	0.0028747	18	79	15	140
483	0.0026109	43	88	17	133
484	0.0032466	26	69	13	112
485	0.0030923	19	71	9	123
486	0.0029284	10	69	14	128
487	0.00289	7	62	12	117
488	0.0035015	6	71	17	136
489	0.0028243	40	86	14	132
490	0.002965	10	72	19	134
491	0.0028613	7	72	13	137
492	0.0026703	48	84	18	120
493	0.0029996	17	75	10	133
494	0.0031194	10	71	16	132
495	0.0031482	14	71	16	128
496	0.0030966	5	54	9	103
497	0.0031891	22	56	12	90
498	0.0028548	19	70	13	121
499	0.0030076	29	70	9	111
500	0.0027788	43	96	15	149
501	0.0030484	22	73	14	124
502	0.0032967	41	85	16	129
503	0.002891	32	83	14	134
504	0.0030706	52	78	11	104
505	0.0029299	82	115	14	148
506	0.0031148	6	86	16	166
507	0.0025851	32	79	16	126
508	0.0029061	15	74	11	133
509	0.0031321	13	66	11	119
510	0.0030907	0	70	10	140
511	0.0029612	37	75	12	113
512	0.0029287	2	80	16	158
513	0.0032181	14	73	17	132
514	0.0030212	35	76	16	117
515	0.0030487	22	79	15	136
516	0.0029755	12	51	7	90
517	0.0030518	17	75	18	133
518	0.0027315	39	96	19	153
519	0.0030058	24	75	16	126
520	0.0030769	9	70	11	131
521	0.0031112	7	68	11	129
522	0.0029105	1	61	9	121
523	0.0034366	63	94	9	125
524	0.0033703	1	67	10	133
525	0.0031188	38	89	16	140
526	0.003026	14	69	17	124
527	0.0029502	10	73	13	136
528	0.0031782	63	96	15	129
529	0.0029503	43	79	14	115
530	0.0031974	14	76	16	138
531	0.0031423	8	71	13	134
532	0.0031089	21	80	17	139
533	0.0030559	19	63	9	107
534	0.0032902	45	96	14	147
535	0.0030523	14	77	12	140
536	0.0031077	9	80	16	151
537	0.0032611	22	86	13	150
538	0.0027573	13	68	15	123
539	0.0033577	12	75	15	138
540	0.0028405	28	75	12	122
541	0.0030297	12	65	12	118
542	0.0035535	24	77	13	130
543	0.0032714	4	64	14	124
544	0.0026585	58	98	19	138
545	0.0031497	16	76	12	136
546	0.0030666	1	63	11	125
547	0.0029633	11	70	9	129
548	0.0028541	31	75	12	119
549	0.0029229	13	75	10	137
550	0.0033333	7	74	10	141
551	0.0029558	22	70	10	118
552	0.0031751	6	76	18	146
553	0.0031335	2	60	13	118
554	0.0028468	10	69	8	128
555	0.0029966	39	89	16	139
556	0.0028696	9	65	11	121
557	0.0032791	23	73	12	123
558	0.003008	17	73	11	129
559	0.0030714	31	72	13	113
560	0.0029746	31	80	11	129
561	0.0029618	20	68	10	116
562	0.0026048	64	106	18	148
563	0.0029679	43	97	19	151
564	0.0029698	20	78	15	136
565	0.0038541	5	59	18	113
566	0.0028027	25	85	13	145
567	0.0030467	55	95	11	135
568	0.003122	8	76	11	144
569	0.0029992	20	69	14	118
570	0.0032511	6	66	14	126
571	0.0028986	9	60	17	111
572	0.0031757	20	73	8	126
573	0.0030722	21	74	14	127
574	0.0031661	33	96	15	159
575	0.0033491	42	81	13	120
576	0.0031063	0	60	11	120
577	0.0029729	39	101	18	163
578	0.0030874	6	61	18	116
579	0.0030012	25	75	19	125
580	0.0028003	37	91	12	145
581	0.0031888	31	91	13	151
582	0.0029721	23	63	17	103
583	0.003096	2	69	13	136
584	0.0032029	46	86	11	126
585	0.0030654	9	70	11	131
586	0.0031192	2	59	12	116
587	0.002894	15	72	12	129
588	0.0029017	12	68	14	124
589	0.0029532	7	78	10	149
590	0.0031835	49	96	19	143
591	0.0033722	0	62	16	124
592	0.0033422	23	82	19	141
593	0.0031003	1	73	12	145
594	0.0031729	17	69	13	121
595	0.0029959	20	76	14	132
596	0.003163	17	76	13	135
597	0.0027623	18	55	13	92
598	0.0031268	1	61	16	121
599	0.0028871	7	65	10	123
600	0.0031106	2	65	15	128
601	0.0030246	46	89	15	132
602	0.0026168	8	70	19	132
603	0.0033053	12	74	12	136
604	0.0027546	45	84	15	123
605	0.0030425	2	77	15	152
606	0.0031124	40	90	11	140
607	0.0028153	1	57	10	113
608	0.0030349	56	95	13	134
609	0.0031235	29	93	15	157
610	0.0030445	36	88	12	140
611	0.003181	5	66	9	127
612	0.0030518	21	79	12	137
613	0.0031079	55	96	13	137
614	0.0026515	24	74	15	124
615	0.0028824	4	51	11	98
616	0.0025895	65	94	11	123
617	0.0034017	15	88	10	161
618	0.0029634	65	104	13	143
619	0.0032968	45	79	13	113
620	0.0033092	30	81	13	132
621	0.0028779	14	68	10	122
622	0.0029639	12	70	16	128
623	0.0034018	2	66	13	130
624	0.0027921	12	68	10	124
625	0.0029295	0	54	12	108
626	0.0031349	26	81	12	136
627	0.0028178	11	70	18	129
628	0.0028979	43	82	9	121
629	0.0030125	24	69	8	114
630	0.0034801	44	87	14	130
631	0.0030908	15	62	11	109
632	0.0029173	2	66	11	130
633	0.0027618	63	105	15	147
634	0.0031312	11	68	11	125
635	0.0031445	20	80	13	140
636	0.0029822	8	62	15	116
637	0.0032237	32	78	12	124
638	0.0028221	29	72	13	115
639	0.0028746	0	73	17	146
640	0.0029181	20	56	9	92
641	0.0031141	48	81	11	114
642	0.003257	17	87	15	157
643	0.0028557	19	68	14	117
644	0.0029176	8	62	12	116
645	0.0029062	19	63	9	107
646	0.002891	17	62	9	107
647	0.0035394	1	51	10	101
648	0.0029452	21	78	17	135
649	0.0032635	37	86	15	135
650	0.0030311	2	55	11	108
651	0.0029881	24	70	12	116
652	0.0031524	4	71	11	138
653	0.0030313	1	68	12	135
654	0.0031434	48	101	11	154
655	0.0029741	27	82	18	137
656	0.0031437	8	78	13	148
657	0.0028607	60	91	16	122
658	0.0033318	20	81	11	142
659	0.0031612	10	69	12	128
660	0.0029001	18	68	11	118
661	0.0031125	15	70	16	125
662	0.0031392	11	64	10	117
663	0.0028518	15	73	12	131
664	0.0029426	55	92	16	129
665	0.0031908	21	73	12	125
666	0.0027996	9	59	11	109
667	0.0033917	17	84	17	151
668	0.0032171	15	68	11	121
669	0.0033275	37	84	13	131
670	0.0030006	15	89	12	163
671	0.0029677	39	77	9	115
672	0.0030909	43	81	11	119
673	0.0032598	12	67	12	122
674	0.0029185	26	87	12	148
675	0.0030448	38	79	19	120
676	0.0028349	23	91	11	159
677	0.0029564	12	65	14	118
678	0.0028941	6	74	12	142
679	0.0029717	18	68	12	118
680	0.0033251	28	82	11	136
681	0.0031404	26	70	8	114
682	0.0029567	12	77	15	142
683	0.0031671	26	91	13	156
684	0.0030641	21	69	14	117
685	0.0033304	52	87	11	122
686	0.0029461	25	74	12	123
687	0.0029383	34	83	12	132
688	0.0028115	10	67	11	124
689	0.003672	42	92	15	142
690	0.0029487	47	83	14	119
691	0.0029148	19	68	14	117
692	0.0029036	1	56	11	111
693	0.0026148	3	59	16	115
694	0.0027447	9	67	13	125
695	0.0030937	4	81	13	158
696	0.0029704	9	56	9	103
697	0.0028958	19	65	12	111
698	0.0029214	5	64	15	123
699	0.0032858	1	51	10	101
700	0.0030347	5	68	14	131
701	0.0029938	0	60	9	120
702	0.0031546	40	78	10	116
703	0.0030361	36	77	15	118
704	0.0030962	28	82	16	136
705	0.0030547	1	75	13	149
706	0.002853	7	66	16	125
707	0.0029938	24	76	16	128
708	0.0030808	10	79	14	148
709	0.0031838	14	64	9	114
710	0.0032927	28	82	13	136
711	0.0027509	38	96	16	154
712	0.0030255	16	66	10	116
713	0.002985	24	72	18	120
714	0.0028996	5	67	14	129
715	0.0031835	17	78	13	139
716	0.0029161	19	68	17	117
717	0.0033833	46	89	13	132
718	0.0032642	1	50	12	99
719	0.0030684	0	55	12	110
720	0.0029107	42	92	11	142
721	0.0036298	47	104	12	161
722	0.0029359	12	66	10	120
723	0.0030586	19	82	18	145
724	0.0028722	9	70	13	131
725	0.0031856	14	71	14	128
726	0.0031005	12	69	13	126
727	0.0031373	28	91	15	154
728	0.0028332	1	68	9	135
729	0.0026336	75	110	19	145
730	0.0032312	13	81	12	149
731	0.0034851	16	72	10	128
732	0.0030009	31	78	13	125
733	0.0029827	15	61	10	107
734	0.0027802	36	76	16	116
735	0.0033764	10	60	8	110
736	0.0027625	19	81	13	143
737	0.0027974	3	69	13	135
738	0.0030633	42	91	11	140
739	0.0031119	5	67	13	129
740	0.0030338	35	73	16	111
741	0.0028971	39	85	16	131
742	0.0030043	27	70	11	113
743	0.0035945	25	78	12	131
744	0.0031521	14	67	12	120
745	0.0031636	48	95	13	142
746	0.0032025	11	70	11	129
747	0.0029919	5	68	14	131
748	0.0032272	59	98	14	137
749	0.0029914	2	65	12	128
750	0.0029528	25	83	12	141
751	0.0029053	7	65	11	123
752	0.0032625	11	72	14	133
753	0.0025617	73	100	16	127
754	0.0028834	18	64	11	110
755	0.0031074	22	70	11	118
756	0.0030296	16	68	10	120
757	0.0030825	3	59	9	115
758	0.0030843	20	67	13	114
759	0.0031012	0	66	12	132
760	0.0031254	8	68	11	128
761	0.0032477	31	87	15	143
762	0.0031965	21	84	13	147
763	0.0031573	16	75	14	134
764	0.0031871	47	84	14	121
765	0.0030254	7	67	15	127
766	0.0031981	12	69	18	126
767	0.0031381	9	61	11	113
768	0.0032703	7	80	13	153
769	0.0030717	2	71	13	140
770	0.0031628	20	66	9	112
771	0.0031142	60	104	15	148
772	0.0029757	7	66	14	125
773	0.0030289	18	75	9	132
774	0.0030376	14	76	14	138
775	0.0029218	16	67	10	118
776	0.002928	39	89	15	139
777	0.0030731	37	80	16	123
778	0.0029753	29	77	11	125
779	0.0031144	12	77	14	142
780	0.0032453	14	83	14	152
781	0.003041	22	71	11	120
782	0.0031743	9	70	12	131
783	0.002953	11	77	13	143
784	0.0029782	12	72	10	132
785	0.0030057	21	85	12	149
786	0.0029819	29	80	14	131
787	0.0034232	12	55	14	98
788	0.0032037	20	79	15	138
789	0.0031431	27	74	13	121
790	0.0028776	7	60	11	113
791	0.0027498	11	66	13	121
792	0.0032446	3	80	12	157
793	0.003305	4	67	15	130
794	0.0027056	35	91	11	147
795	0.0031708	14	77	10	140
796	0.0032607	5	74	15	143
797	0.0028348	30	66	11	102
798	0.002788	21	72	9	123
799	0.0031319	23	76	15	129
800	0.0029367	8	73	13	138
801	0.0029968	5	51	12	97
802	0.0031429	14	65	11	116
803	0.0029821	8	54	15	100
804	0.0031702	3	68	15	133
805	0.0031135	39	96	13	153
806	0.0032022	32	87	15	142
807	0.0025764	48	94	16	140
808	0.0030792	9	62	13	115
809	0.0029374	4	58	11	112
810	0.0028107	18	64	17	110
811	0.0029933	16	70	15	124
812	0.0031406	11	72	8	133
813	0.0029901	19	70	9	121
814	0.003015	74	102	15	130
815	0.0029857	3	76	10	149
816	0.0031388	4	62	15	120
817	0.0030556	21	79	15	137
818	0.0031584	17	77	16	137
819	0.0029142	14	60	15	106
820	0.0029038	8	59	17	110
821	0.0030525	36	79	12	122
822	0.0031538	57	100	13	143
823	0.0030458	14	65	10	116
824	0.0028762	38	86	12	134
825	0.0030596	4	59	11	114
826	0.003117	16	82	12	148
827	0.0027458	48	91	19	134
828	0.0031475	8	68	11	128
829	0.0029323	45	92	14	139
830	0.002773	9	64	14	119
831	0.0029481	24	83	12	142
832	0.0028973	53	99	12	145
833	0.0030253	12	81	16	150
834	0.0028572	8	63	12	118
835	0.0033749	3	69	8	135
836	0.0029917	24	67	9	110
837	0.0030719	2	73	14	144
838	0.0032429	34	79	12	124
839	0.003424	4	71	10	138
840	0.0029432	32	87	12	142
841	0.002995	13	63	11	113
842	0.0031551	11	79	13	147
843	0.0031077	6	65	11	124
844	0.0029016	21	76	15	131
845	0.002997	1	67	12	133
846	0.0030108	6	65	9	124
847	0.0035842	27	98	18	169
848	0.0030427	3	65	12	127
849	0.0031984	23	68	10	113
850	0.0030028	8	77	14	146
851	0.0028785	11	73	13	135
852	0.0035927	7	58	9	109
853	0.0029504	25	73	17	121
854	0.0034691	18	84	13	150
855	0.0031224	13	73	14	133
856	0.003645	34	81	11	128
857	0.0031405	2	70	10	138
858	0.0032193	6	61	9	116
859	0.0029066	54	93	14	132
860	0.0030499	28	88	13	148
861	0.0032564	4	74	11	144
862	0.0033841	5	58	10	111
863	0.0028183	29	88	16	147
864	0.002902	46	88	16	130
865	0.0033956	37	94	16	151
866	0.0029397	47	86	12	125
867	0.0025902	7	61	18	115
868	0.0030904	4	69	17	134
869	0.0030265	9	73	15	137
870	0.0031144	19	67	11	115
871	0.0031769	4	57	16	110
872	0.0030571	10	71	17	132
873	0.0028386	11	77	10	143
874	0.0030411	2	70	15	138
875	0.003295	1	54	12	107
876	0.0028278	31	72	13	113
877	0.002918	21	74	10	127
878	0.002947	2	66	10	130
879	0.0028649	55	101	16	147
880	0.0030816	28	72	11	116
881	0.0030658	13	74	11	135
882	0.0028768	41	83	16	125
883	0.0030522	6	68	17	130
884	0.0030943	11	70	10	129
885	0.0030243	12	79	17	146
886	0.0027185	47	78	13	109
887	0.0030202	51	87	11	123
888	0.0036421	4	57	12	110
889	0.0028015	14	75	9	136
890	0.0043375	11	74	13	137
891	0.0030337	36	72	14	108
892	0.0030598	13	61	19	109
893	0.0029266	12	63	11	114
894	0.0028345	17	75	16	133
895	0.003004	12	71	12	130
896	0.0031821	55	90	12	125
897	0.0031587	18	61	10	104
898	0.0031391	7	77	11	147
899	0.002996	17	85	11	153
900	0.0029202	23	67	12	111
901	0.0031068	4	58	11	112
902	0.00288	13	77	17	141
903	0.0031829	5	74	13	143
904	0.003111	26	70	11	114
905	0.0028321	13	67	14	121
906	0.0031855	28	86	12	144
907	0.0027896	14	61	11	108
908	0.0031838	1	66	10	131
909	0.0031166	11	67	16	123
910	0.0030717	16	72	14	128
911	0.0030092	8	58	12	108
912	0.0032275	21	69	14	117
913	0.002763	34	76	11	118
914	0.0027287	3	56	13	109
915	0.0028511	25	81	13	137
916	0.0028587	8	78	12	148
917	0.0030048	9	75	15	141
918	0.0029789	2	62	13	122
919	0.0031552	10	78	16	146
920	0.0030637	14	72	14	130
921	0.0031202	14	75	10	136
922	0.0030433	17	70	10	123
923	0.0029096	30	72	9	114
924	0.0027616	5	49	7	93
925	0.0031341	2	69	12	136
926	0.0031082	24	77	11	130
927	0.0030069	8	83	12	158
928	0.0030955	33	79	12	125
929	0.0027488	2	65	13	128
930	0.0030116	14	67	10	120
931	0.00314	5	70	10	135
932	0.0031215	54	91	16	128
933	0.0028986	14	72	12	130
934	0.003059	4	61	9	118
935	0.0029961	29	77	19	125
936	0.0031873	14	79	15	144
937	0.0030667	2	67	11	132
938	0.0028926	25	66	14	107
939	0.0034365	21	75	15	129
940	0.0031008	12	78	17	144
941	0.0031867	8	72	13	136
942	0.0029508	19	83	18	147
943	0.0029464	60	101	12	142
944	0.0028507	35	89	16	143
945	0.002884	4	70	13	136
946	0.0032603	32	97	11	162
947	0.0031552	7	69	13	131
948	0.0029589	13	89	14	165
949	0.002972	6	62	12	118
950	0.0030153	12	62	12	112
951	0.0033758	14	69	11	124
952	0.0037727	30	95	17	160
953	0.0030321	70	104	15	138
954	0.0029749	15	59	9	103
955	0.0029334	11	74	11	137
956	0.003064	30	78	14	126
957	0.0032172	13	77	13	141
958	0.0032145	8	64	14	120
959	0.0031291	16	67	13	118
960	0.0031806	3	69	13	135
961	0.0031404	9	65	12	121
962	0.0030411	13	71	13	129
963	0.0029917	54	96	13	138
964	0.0030395	5	70	11	135
965	0.0030588	14	82	16	150
966	0.0031876	30	89	12	148
967	0.0033573	9	66	10	123
968	0.0029489	9	64	9	119
969	0.002915	6	65	18	124
970	0.0032048	27	78	17	129
971	0.002946	44	81	12	118
972	0.0031236	38	80	11	122
973	0.0031153	17	72	14	127
974	0.0034211	19	70	11	121
975	0.0031333	37	86	10	135
976	0.0031276	13	70	13	127
977	0.0034747	16	71	15	126
978	0.0031041	21	72	19	123
979	0.0029071	5	57	13	109
980	0.0030307	41	89	11	137
981	0.0031914	39	94	11	149
982	0.0032544	22	74	14	126
983	0.0029723	40	80	10	120
984	0.0030379	1	68	13	135
985	0.0028784	7	77	17	147
986	0.0028314	8	73	19	138
987	0.0030559	17	68	10	119
988	0.0028769	32	79	18	126
989	0.0028773	8	55	8	102
990	0.0033214	23	82	12	141
991	0.0030015	51	78	12	105
992	0.0032699	16	64	11	112
993	0.0029339	37	85	19	133
994	0.0031427	3	70	13	137
995	0.0029337	8	79	15	150
996	0.00338	22	80	13	138
997	0.0030657	37	78	17	119
998	0.0030585	18	80	12	142
999	0.002962	8	74	19	140
mean	0.00305418	20.043	74.193	12.975	128.343

## Sheet: DACC_D
	time	SEq	Bal	Reg	Egal
0	0.0006935	38	81	13	124
1	0.000549	14	73	14	132
2	0.0004188	79	117	19	155
3	0.0005545	9	74	11	139
4	0.0005062	12	77	12	142
5	0.0005056	8	70	17	132
6	0.0006506	58	108	16	158
7	0.000586	19	75	11	131
8	0.0005888	15	70	11	125
9	0.0005507	26	72	10	118
10	0.0007603	14	89	17	164
11	0.0005455	11	79	12	147
12	0.0005262	28	85	13	142
13	0.0005588	10	58	14	106
14	0.0004288	1	59	11	117
15	0.0005321	20	72	13	124
16	0.0004949	32	91	13	150
17	0.0006035	7	69	16	131
18	0.0005861	19	78	18	137
19	0.0005376	24	72	11	120
20	0.0005103	34	90	16	146
21	0.0004756	34	79	9	124
22	0.0006095	35	90	15	145
23	0.0004916	4	63	9	122
24	0.0005318	10	74	10	138
25	0.0007804	14	84	16	154
26	0.0006544	31	84	18	137
27	0.0005777	9	63	18	117
28	0.0004152	15	60	11	105
29	0.0004908	9	67	10	125
30	0.0005766	10	70	16	130
31	0.0005447	1	60	14	119
32	0.0004795	15	66	11	117
33	0.0005677	8	84	18	160
34	0.0004788	7	65	9	123
35	0.000479	0	62	12	124
36	0.0005394	6	66	17	126
37	0.0005484	12	69	13	126
38	0.0005178	18	70	19	122
39	0.0005302	10	73	12	136
40	0.0005291	36	89	12	142
41	0.0006376	34	93	15	152
42	0.0005022	17	66	11	115
43	0.0004462	34	73	15	112
44	0.0005472	46	90	17	134
45	0.0005912	45	94	13	143
46	0.000663	16	76	16	136
47	0.0005951	26	85	14	144
48	0.0006205	6	68	10	130
49	0.0005064	20	75	12	130
50	0.0005495	13	73	13	133
51	0.0004865	5	63	12	121
52	0.0005555	41	76	11	111
53	0.0004721	22	67	11	112
54	0.0005203	63	95	16	127
55	0.0004329	20	62	13	104
56	0.0005373	2	78	12	154
57	0.0005343	11	72	14	133
58	0.0005349	73	107	17	141
59	0.0006118	8	83	16	158
60	0.0005401	43	104	19	165
61	0.0005088	30	78	12	126
62	0.0006724	4	82	13	160
63	0.0004588	23	64	18	105
64	0.0006997	74	123	15	172
65	0.0005471	5	60	8	115
66	0.0005084	12	62	12	112
67	0.000569	21	74	12	127
68	0.0005254	22	93	15	164
69	0.0004858	19	71	9	123
70	0.000514	28	77	16	126
71	0.0004949	70	100	19	130
72	0.0005819	21	81	13	141
73	0.0005459	42	84	14	126
74	0.0004846	9	64	13	119
75	0.0005799	4	67	15	130
76	0.0005205	53	96	12	139
77	0.0006496	60	94	10	128
78	0.0005865	13	72	9	131
79	0.0005409	11	71	13	131
80	0.0004125	2	55	13	108
81	0.000616	106	144	18	182
82	0.0006149	40	87	14	134
83	0.0005702	45	101	14	157
84	0.0005304	3	50	13	97
85	0.0005744	6	75	11	144
86	0.0004817	4	65	13	126
87	0.0005772	4	76	18	148
88	0.0006697	31	90	14	149
89	0.0006127	10	76	15	142
90	0.0004777	15	61	8	107
91	0.0005793	8	65	13	122
92	0.0006177	44	80	14	116
93	0.0004024	6	51	12	96
94	0.0004828	109	130	19	151
95	0.0005664	9	82	15	155
96	0.0005818	15	66	19	117
97	0.0003931	0	50	10	100
98	0.0005929	7	72	12	137
99	0.0005589	38	81	14	124
100	0.0005371	39	76	12	113
101	0.0005966	23	89	17	155
102	0.0005415	21	67	10	113
103	0.0005226	8	75	13	142
104	0.0005376	18	76	10	134
105	0.0005173	39	96	16	153
106	0.0004131	2	55	12	108
107	0.0006238	58	103	13	148
108	0.0005201	22	73	11	124
109	0.000528	13	70	10	127
110	0.0005577	14	71	11	128
111	0.0004332	78	115	17	152
112	0.000449	12	70	14	128
113	0.0004761	8	69	12	130
114	0.0004792	16	68	17	120
115	0.0006011	8	69	17	130
116	0.0005146	3	70	13	137
117	0.0005403	19	73	8	127
118	0.0004505	85	121	19	157
119	0.0004673	103	130	17	157
120	0.0004647	16	78	10	140
121	0.0005081	32	77	12	122
122	0.0005353	4	60	12	116
123	0.0005479	10	62	9	114
124	0.0004998	2	58	11	114
125	0.0004675	13	70	14	127
126	0.0005071	8	64	15	120
127	0.0006011	12	75	12	138
128	0.0004394	4	58	11	112
129	0.0005229	28	87	15	146
130	0.0004904	33	76	13	119
131	0.0006415	23	68	10	113
132	0.0005252	9	64	11	119
133	0.0005335	23	80	13	137
134	0.0004575	4	59	19	114
135	0.0007734	42	96	17	150
136	0.0005096	38	70	11	102
137	0.0007044	66	108	16	150
138	0.0003872	42	77	16	112
139	0.0006198	28	84	18	140
140	0.0005343	7	64	11	121
141	0.00049	39	100	18	161
142	0.0005483	10	79	16	148
143	0.000483	55	97	14	139
144	0.0004873	11	78	12	145
145	0.000664	31	81	16	131
146	0.0005896	146	171	18	196
147	0.0004482	24	64	13	104
148	0.0005003	2	59	14	116
149	0.000543	18	71	15	124
150	0.0005176	21	70	13	119
151	0.0005822	21	74	13	127
152	0.0005518	16	75	16	134
153	0.000509	1	70	13	139
154	0.0006754	3	68	16	133
155	0.0006201	15	80	13	145
156	0.0004786	43	85	9	127
157	0.0005626	78	106	15	134
158	0.0005314	4	74	13	144
159	0.0006364	41	86	10	131
160	0.0005375	24	76	18	128
161	0.000502	56	97	14	138
162	0.0005182	58	105	17	152
163	0.0005514	14	68	14	122
164	0.0004663	16	70	16	124
165	0.0005425	32	89	19	146
166	0.000665	18	91	19	164
167	0.0004868	8	52	13	96
168	0.0006502	28	77	12	126
169	0.000516	4	71	12	138
170	0.0006348	2	72	16	142
171	0.0005038	16	70	15	124
172	0.000477	12	63	13	114
173	0.0005742	24	83	15	142
174	0.0004294	46	88	11	130
175	0.000657	21	85	16	149
176	0.0005005	59	97	15	135
177	0.0004674	28	77	10	126
178	0.0004839	11	63	10	115
179	0.0005241	19	79	13	139
180	0.0005535	21	74	13	127
181	0.0005521	11	64	16	117
182	0.0005101	54	93	16	132
183	0.0004804	9	60	13	111
184	0.0005255	28	74	15	120
185	0.0004732	3	67	12	131
186	0.0005007	36	83	19	130
187	0.0005142	20	79	16	138
188	0.000568	26	71	12	116
189	0.0005629	18	74	11	130
190	0.0006183	9	76	15	143
191	0.0005556	15	70	11	125
192	0.0006076	75	114	19	153
193	0.0004851	18	76	15	134
194	0.000408	8	61	12	114
195	0.0005343	20	71	14	122
196	0.0004307	18	75	11	132
197	0.0004832	13	62	13	111
198	0.0005127	28	77	18	126
199	0.0004936	11	59	14	107
200	0.0006116	21	89	17	157
201	0.0006026	39	83	15	127
202	0.0004817	2	76	14	150
203	0.0005367	14	70	13	126
204	0.0005953	2	74	12	146
205	0.0004504	61	95	13	129
206	0.000549	44	96	15	148
207	0.0004709	32	65	14	98
208	0.0004248	69	102	17	135
209	0.0004882	18	68	13	118
210	0.0005004	7	70	16	133
211	0.0005567	11	74	13	137
212	0.0005717	56	107	12	158
213	0.0005533	14	67	11	120
214	0.0004779	31	79	16	127
215	0.0005264	7	69	9	131
216	0.0005153	8	49	10	90
217	0.0004715	6	48	8	90
218	0.0005843	14	74	8	134
219	0.0005801	11	87	12	163
220	0.0005637	2	66	13	130
221	0.0005966	11	82	13	153
222	0.0005627	7	66	12	125
223	0.0005433	30	77	14	124
224	0.0005614	19	77	12	135
225	0.0005849	13	72	12	131
226	0.0005376	15	69	12	123
227	0.0005295	30	70	17	110
228	0.0005423	44	87	14	130
229	0.0005174	9	70	15	131
230	0.0004959	49	91	12	133
231	0.000466	15	72	15	129
232	0.000468	6	64	13	122
233	0.0006344	21	75	11	129
234	0.0004144	43	77	14	111
235	0.0005241	62	95	16	128
236	0.0005302	18	77	13	136
237	0.0005047	41	88	19	135
238	0.0005496	16	79	18	142
239	0.0005634	5	80	18	155
240	0.0004593	13	63	17	113
241	0.0005252	13	75	15	137
242	0.0005879	21	88	14	155
243	0.00054	24	82	14	140
244	0.0005257	2	68	11	134
245	0.0004579	50	79	11	108
246	0.0004876	16	72	13	128
247	0.0006716	53	94	19	135
248	0.0005333	28	87	16	146
249	0.0004248	44	83	10	122
250	0.0005314	8	69	12	130
251	0.000545	6	66	11	126
252	0.0005404	20	78	17	136
253	0.0005472	24	80	16	136
254	0.0005473	10	71	12	132
255	0.0006181	9	69	12	129
256	0.000565	35	87	14	139
257	0.0005844	6	73	13	140
258	0.0005508	28	78	12	128
259	0.0005099	20	75	8	130
260	0.0005449	29	95	16	161
261	0.0005439	8	88	16	168
262	0.0005303	28	78	15	128
263	0.0005791	15	73	13	131
264	0.0005133	23	76	14	129
265	0.0005154	16	77	12	138
266	0.0005832	10	68	17	126
267	0.000601	14	81	16	148
268	0.0005096	21	87	14	153
269	0.0005824	36	84	13	132
270	0.00053	3	65	16	127
271	0.000561	5	74	13	143
272	0.0004913	19	74	15	129
273	0.0006026	47	85	13	123
274	0.0005599	39	86	15	133
275	0.000504	3	63	14	123
276	0.0004123	15	70	16	125
277	0.000406	70	97	11	124
278	0.000636	49	95	17	141
279	0.0004925	2	76	9	150
280	0.0005121	27	75	11	123
281	0.0005198	8	65	11	122
282	0.0004651	59	85	14	111
283	0.0005158	50	83	12	116
284	0.0005748	4	70	14	136
285	0.0004979	45	104	18	163
286	0.0005248	28	73	17	118
287	0.0005738	8	68	17	128
288	0.0005949	43	84	12	125
289	0.0004754	14	60	9	106
290	0.0005713	20	73	17	126
291	0.0004628	6	72	11	138
292	0.0005039	19	80	14	141
293	0.0005189	4	68	16	132
294	0.0004942	57	101	17	145
295	0.0005418	23	75	18	127
296	0.0005557	6	77	18	148
297	0.0005484	28	82	17	136
298	0.0004782	26	76	14	126
299	0.0005511	24	86	18	148
300	0.0004865	17	86	14	155
301	0.0005906	13	76	12	139
302	0.0003802	7	53	8	99
303	0.0004946	1	64	19	127
304	0.0006059	31	83	15	135
305	0.0005299	82	124	16	166
306	0.0004802	27	75	16	123
307	0.000512	12	65	13	118
308	0.0005682	0	72	14	144
309	0.0004103	8	60	8	112
310	0.0004908	33	79	11	125
311	0.0004018	24	72	9	120
312	0.0005005	15	72	13	129
313	0.0005146	7	64	15	121
314	0.0004946	18	73	15	128
315	0.0004445	57	94	14	131
316	0.0005739	2	74	16	146
317	0.0005295	15	74	17	133
318	0.0005631	55	107	18	159
319	0.0004766	0	51	10	102
320	0.0004892	17	74	13	131
321	0.0005174	51	100	15	149
322	0.0005715	24	84	17	144
323	0.0005475	21	70	11	119
324	0.0005609	54	98	18	142
325	0.000503	31	85	14	139
326	0.0005866	13	77	10	141
327	0.0005977	78	120	19	162
328	0.0004348	59	91	14	123
329	0.0004732	2	60	16	118
330	0.0005524	55	93	14	131
331	0.0005276	41	94	18	147
332	0.0004895	22	76	15	130
333	0.0005253	1	66	11	131
334	0.0004971	14	70	12	126
335	0.0006377	9	80	13	151
336	0.0005297	4	70	15	136
337	0.0005142	16	73	13	130
338	0.0004966	4	73	10	142
339	0.0004704	27	69	12	111
340	0.0005397	16	68	17	120
341	0.000793	49	102	14	155
342	0.0005557	16	81	11	146
343	0.0004856	3	66	10	129
344	0.0005922	7	70	15	133
345	0.0005642	2	64	12	126
346	0.0004545	7	69	9	131
347	0.0006888	1	79	13	157
348	0.0005802	49	98	17	147
349	0.0006638	19	80	15	141
350	0.0005181	7	61	14	115
351	0.0005512	36	87	16	138
352	0.0004836	14	69	12	124
353	0.0005295	15	75	10	135
354	0.0006062	51	92	14	133
355	0.0004693	9	55	16	101
356	0.0006209	6	79	17	152
357	0.0006689	35	83	12	131
358	0.0005392	10	76	14	142
359	0.000481	12	63	11	114
360	0.0005109	16	66	18	116
361	0.0004578	14	62	11	110
362	0.0005397	16	70	18	124
363	0.0004933	28	76	17	124
364	0.0005083	4	69	16	134
365	0.0005905	13	65	12	117
366	0.000458	1	60	14	119
367	0.0004844	8	66	17	124
368	0.000523	19	70	11	121
369	0.000475	9	69	10	129
370	0.0005442	19	86	13	153
371	0.0007124	60	102	14	144
372	0.0005498	22	76	19	130
373	0.000736	11	77	12	143
374	0.0006812	2	77	17	152
375	0.0005627	42	95	19	148
376	0.0006002	29	82	13	135
377	0.0004366	15	65	9	115
378	0.0005255	22	81	17	140
379	0.0005401	9	80	15	151
380	0.0004803	0	64	14	128
381	0.000581	59	97	18	135
382	0.0004848	35	84	13	133
383	0.0004732	37	80	11	123
384	0.0005392	66	102	16	138
385	0.0006978	48	111	17	174
386	0.0005425	48	83	10	118
387	0.0006053	39	89	13	139
388	0.000557	0	61	16	122
389	0.0006216	4	77	15	150
390	0.0004651	23	76	13	129
391	0.0005045	18	62	15	106
392	0.0005202	25	76	12	127
393	0.0005414	20	69	9	118
394	0.0004892	66	101	15	136
395	0.0005281	52	90	16	128
396	0.0005217	12	75	17	138
397	0.0004611	9	51	9	93
398	0.0004846	12	62	10	112
399	0.0005842	10	76	13	142
400	0.0005709	39	95	16	151
401	0.0005557	1	50	12	99
402	0.0004954	12	79	13	146
403	0.0006195	7	73	17	139
404	0.0005045	25	80	12	135
405	0.0006579	16	81	17	146
406	0.0004316	4	56	11	108
407	0.0006303	48	94	16	140
408	0.000404	63	96	17	129
409	0.0005365	29	84	16	139
410	0.0006016	58	109	18	160
411	0.000489	2	63	10	124
412	0.0005036	12	78	19	144
413	0.0004946	69	102	15	135
414	0.0006038	22	90	13	158
415	0.0006253	41	87	18	133
416	0.000446	27	62	13	97
417	0.0005853	16	81	14	146
418	0.0004729	48	90	14	132
419	0.0005934	29	96	17	163
420	0.0004703	26	80	13	134
421	0.0003626	17	60	14	103
422	0.0007141	34	91	14	148
423	0.0004673	11	65	12	119
424	0.0005949	10	84	14	158
425	0.0004522	37	85	12	133
426	0.0006804	35	101	15	167
427	0.0005076	17	63	12	109
428	0.0005878	12	81	11	150
429	0.0006541	40	79	12	118
430	0.0005621	45	79	10	113
431	0.000478	65	104	16	143
432	0.0005321	46	92	19	138
433	0.0005687	46	119	14	192
434	0.0005074	56	89	17	122
435	0.0006521	68	110	14	152
436	0.0005818	4	70	13	136
437	0.000448	34	77	13	120
438	0.0005473	66	107	16	148
439	0.0004359	41	85	18	129
440	0.0005796	20	76	13	132
441	0.0004747	3	53	13	103
442	0.0005662	28	91	14	154
443	0.000561	0	61	16	122
444	0.000581	5	66	12	127
445	0.0005442	42	85	18	128
446	0.0004937	11	61	11	111
447	0.0005099	103	131	17	159
448	0.0005684	7	67	13	127
449	0.0005214	5	69	16	133
450	0.0005443	8	67	15	126
451	0.0004788	7	55	11	103
452	0.0005248	4	57	11	110
453	0.0004573	14	58	14	102
454	0.0006189	77	121	16	165
455	0.0004564	27	74	12	121
456	0.0005037	23	74	12	125
457	0.0006032	40	104	15	168
458	0.0004882	5	64	9	123
459	0.0004714	17	65	9	113
460	0.0005198	59	110	18	161
461	0.0005881	31	76	13	121
462	0.0004692	30	70	10	110
463	0.0005961	25	80	13	135
464	0.000486	26	77	12	128
465	0.0004523	11	78	12	145
466	0.0005912	9	58	9	107
467	0.0004851	13	63	10	113
468	0.0005018	9	64	11	119
469	0.0005907	7	76	15	145
470	0.0005351	12	68	11	124
471	0.0006785	42	94	16	146
472	0.0004495	2	57	10	112
473	0.0004883	2	72	14	142
474	0.000616	41	97	12	153
475	0.0006307	16	61	17	106
476	0.0005186	12	71	15	130
477	0.0004695	5	64	15	123
478	0.000444	19	70	11	121
479	0.0006417	21	86	10	151
480	0.0004495	45	85	13	125
481	0.000513	4	70	19	136
482	0.0006711	11	82	16	153
483	0.0005946	43	88	17	133
484	0.000532	26	69	13	112
485	0.0005343	12	66	9	120
486	0.000539	10	69	14	128
487	0.000533	7	66	12	125
488	0.0005909	25	83	18	141
489	0.000594	1	71	14	141
490	0.0005184	10	72	19	134
491	0.0005879	69	104	18	139
492	0.000582	48	84	18	120
493	0.00056	21	76	10	131
494	0.0005519	64	103	12	142
495	0.0005508	20	75	12	130
496	0.0004948	5	54	9	103
497	0.0004822	22	56	12	90
498	0.000731	19	70	13	121
499	0.0004767	29	70	9	111
500	0.0006809	43	96	15	149
501	0.0005593	22	73	14	124
502	0.0005394	16	80	15	144
503	0.0004941	8	72	17	136
504	0.0004842	3	57	12	111
505	0.000537	35	95	19	155
506	0.0005944	6	86	16	166
507	0.0005317	32	79	16	126
508	0.0005841	43	91	17	139
509	0.0005512	7	63	12	119
510	0.0006242	0	70	10	140
511	0.0005759	44	84	14	124
512	0.0005891	11	85	19	159
513	0.0005181	14	73	17	132
514	0.0004531	3	69	15	135
515	0.000572	22	79	15	136
516	0.0004242	12	51	7	90
517	0.0006058	35	93	13	151
518	0.0005909	39	96	19	153
519	0.0005714	24	75	16	126
520	0.0005661	81	114	17	147
521	0.000524	7	68	11	129
522	0.0005182	53	96	12	139
523	0.0006578	17	71	10	125
524	0.0005351	1	67	10	133
525	0.0005371	6	74	15	142
526	0.0005316	14	69	17	124
527	0.0004593	6	71	13	136
528	0.0004878	11	76	13	141
529	0.0004836	10	64	15	118
530	0.0005664	33	86	19	139
531	0.0005441	71	110	16	149
532	0.0006359	21	80	17	139
533	0.0004744	10	65	11	120
534	0.0005811	39	99	15	159
535	0.0004941	25	81	13	137
536	0.0005651	96	125	19	154
537	0.0005566	22	86	13	150
538	0.0004543	13	68	15	123
539	0.000554	44	99	17	154
540	0.000513	8	68	12	128
541	0.0005606	15	67	13	119
542	0.0005464	24	77	13	130
543	0.0005177	40	85	16	130
544	0.0005192	48	93	19	138
545	0.0005607	51	98	13	145
546	0.0004923	1	63	11	125
547	0.0005455	11	70	9	129
548	0.00059	31	75	12	119
549	0.0006199	13	75	10	137
550	0.0005946	41	96	17	151
551	0.0004145	22	70	10	118
552	0.0005621	42	101	18	160
553	0.0005837	24	78	14	132
554	0.000535	21	77	9	133
555	0.0005763	11	83	15	155
556	0.0005002	9	65	11	121
557	0.0005435	23	73	12	123
558	0.0005281	58	101	15	144
559	0.0005089	7	67	13	127
560	0.0006035	16	77	14	138
561	0.0005406	44	94	15	144
562	0.0005697	64	106	18	148
563	0.0005752	49	106	18	163
564	0.0005451	20	78	15	136
565	0.0004976	5	59	18	113
566	0.0005993	25	85	13	145
567	0.0005282	8	72	11	136
568	0.0006143	27	86	11	145
569	0.0004345	20	69	14	118
570	0.00055	6	66	14	126
571	0.0005546	3	61	18	119
572	0.0005463	20	73	8	126
573	0.0005038	11	70	14	129
574	0.0005647	56	111	15	166
575	0.0005229	72	103	15	134
576	0.0006946	17	69	11	121
577	0.0005702	60	108	19	156
578	0.0004593	6	61	18	116
579	0.0005942	10	75	19	140
580	0.0005545	28	84	16	140
581	0.0005631	10	77	13	144
582	0.0004976	13	59	17	105
583	0.0005818	2	69	13	136
584	0.0005565	12	70	13	128
585	0.0005421	23	76	12	129
586	0.0005049	15	69	12	123
587	0.0005211	8	69	12	130
588	0.0005371	31	78	15	125
589	0.0004406	7	78	10	149
590	0.0005911	2	79	19	156
591	0.000487	0	62	16	124
592	0.0005278	37	90	15	143
593	0.000692	8	76	12	144
594	0.0005187	14	73	11	132
595	0.0005902	20	76	14	132
596	0.0005562	17	76	13	135
597	0.0004912	66	92	16	118
598	0.0005174	21	74	13	127
599	0.0005206	7	65	10	123
600	0.0005592	53	91	14	129
601	0.0006172	9	73	15	137
602	0.000522	8	70	19	132
603	0.0006133	3	76	13	149
604	0.0004654	24	78	19	132
605	0.0005913	33	96	15	159
606	0.0006904	59	97	12	135
607	0.0005101	1	57	10	113
608	0.0005189	21	83	13	145
609	0.0005117	29	93	15	157
610	0.0004778	36	88	12	140
611	0.0006571	43	91	17	139
612	0.0005068	12	76	12	140
613	0.0006043	31	88	18	145
614	0.0005178	24	74	15	124
615	0.0004548	4	51	11	98
616	0.0005798	65	94	11	123
617	0.0005071	15	88	10	161
618	0.0005743	12	78	17	144
619	0.0004469	13	72	14	131
620	0.0006292	30	81	13	132
621	0.0006474	14	68	10	122
622	0.0005693	3	74	16	145
623	0.0005443	15	74	13	133
624	0.0005802	12	68	10	124
625	0.0004012	0	54	12	108
626	0.0004319	71	111	14	151
627	0.0005229	3	66	18	129
628	0.0005213	17	81	15	145
629	0.0005215	24	69	8	114
630	0.0004319	63	101	14	139
631	0.0004829	15	62	11	109
632	0.000527	12	73	13	134
633	0.0006217	63	105	15	147
634	0.0005452	26	76	11	126
635	0.0006304	20	80	13	140
636	0.000531	8	62	15	116
637	0.0005485	64	100	17	136
638	0.0005466	29	72	13	115
639	0.0005932	0	73	17	146
640	0.0004965	20	56	9	92
641	0.0003556	52	86	11	120
642	0.0006041	7	83	18	159
643	0.0004506	19	68	14	117
644	0.0004798	8	62	12	116
645	0.0004985	16	62	9	108
646	0.000439	56	91	18	126
647	0.0004487	1	51	10	101
648	0.0005393	1	69	17	137
649	0.0006196	37	86	15	135
650	0.0004482	17	67	13	117
651	0.0005248	45	79	15	113
652	0.000578	34	86	11	138
653	0.0005719	15	78	14	141
654	0.000537	24	91	16	158
655	0.0006949	36	92	18	148
656	0.0005415	8	78	13	148
657	0.0005195	60	91	16	122
658	0.0005664	29	88	13	147
659	0.000596	10	72	12	134
660	0.00044	3	58	13	113
661	0.0005781	29	84	15	139
662	0.0004739	8	65	11	122
663	0.0005453	15	73	12	131
664	0.0005983	55	92	16	129
665	0.0005391	21	73	12	125
666	0.0005674	5	62	14	119
667	0.0006066	17	84	17	151
668	0.0005861	45	83	17	121
669	0.0006275	37	84	13	131
670	0.0006383	15	89	12	163
671	0.0005648	39	77	9	115
672	0.0005328	3	64	12	125
673	0.0005775	33	79	12	125
674	0.0005602	26	87	12	148
675	0.000587	38	79	19	120
676	0.0006599	23	91	11	159
677	0.000514	12	66	14	120
678	0.0005947	6	74	12	142
679	0.0005359	2	60	12	118
680	0.0005215	28	82	11	136
681	0.0005423	21	76	16	131
682	0.0005827	38	93	12	148
683	0.0006131	21	90	14	159
684	0.000592	39	84	17	129
685	0.000592	8	67	15	126
686	0.000425	63	95	12	127
687	0.0005832	34	83	12	132
688	0.0004929	10	67	11	124
689	0.0005693	14	81	15	148
690	0.0005325	47	83	14	119
691	0.0005014	36	79	14	122
692	0.0005475	1	56	11	111
693	0.0005076	3	59	16	115
694	0.0005279	54	102	19	150
695	0.0005599	20	91	14	162
696	0.0005076	9	56	9	103
697	0.0004854	45	79	12	113
698	0.0005092	5	64	15	123
699	0.000482	1	51	10	101
700	0.0005633	76	112	19	148
701	0.0004921	0	60	9	120
702	0.000446	17	69	10	121
703	0.0005329	25	80	19	135
704	0.0005518	28	82	16	136
705	0.0006132	33	94	15	155
706	0.0005554	7	66	16	125
707	0.0005667	24	76	16	128
708	0.0005514	41	96	13	151
709	0.0006021	5	61	11	117
710	0.0005197	33	90	11	147
711	0.0005555	29	93	16	157
712	0.0005017	23	84	17	145
713	0.0004824	24	72	18	120
714	0.0005638	5	67	14	129
715	0.0006001	32	86	13	140
716	0.0005002	19	68	17	117
717	0.0005405	46	89	13	132
718	0.0004466	31	67	15	103
719	0.0004892	0	55	12	110
720	0.0007172	97	126	17	155
721	0.0005835	100	141	18	182
722	0.0005477	24	67	12	110
723	0.0006207	67	110	18	153
724	0.0005338	9	70	13	131
725	0.0005104	35	81	16	127
726	0.0005846	1	65	13	129
727	0.0005373	28	91	15	154
728	0.0005146	1	68	9	135
729	0.000533	75	110	19	145
730	0.0005227	23	87	19	151
731	0.0005077	16	72	10	128
732	0.0004536	13	70	15	127
733	0.0005292	15	61	10	107
734	0.0005806	19	70	16	121
735	0.0004508	4	59	8	114
736	0.0005955	19	81	13	143
737	0.0005457	3	69	13	135
738	0.0006023	6	75	15	144
739	0.0005705	5	67	13	129
740	0.0004364	19	65	16	111
741	0.0005161	39	85	16	131
742	0.0005278	9	66	12	123
743	0.0005213	1	70	12	139
744	0.0005217	14	67	12	120
745	0.0005448	6	76	17	146
746	0.0005539	11	70	11	129
747	0.0005284	5	68	14	131
748	0.0005335	28	93	15	158
749	0.000445	46	92	14	138
750	0.0005731	25	83	12	141
751	0.0004989	35	86	17	137
752	0.0004278	15	70	15	125
753	0.0007234	73	100	16	127
754	0.0004663	14	67	11	120
755	0.0004927	2	65	16	128
756	0.0005778	59	95	14	131
757	0.0003844	24	70	10	116
758	0.0005413	2	61	13	120
759	0.0004983	0	66	12	132
760	0.000482	8	68	11	128
761	0.0005428	38	94	13	150
762	0.0005691	21	84	13	147
763	0.0006847	84	128	15	172
764	0.0004584	10	70	15	130
765	0.0005554	21	75	12	129
766	0.0005602	0	64	18	128
767	0.0004346	94	118	16	142
768	0.0006252	7	80	13	153
769	0.0005486	9	74	13	139
770	0.0005429	20	66	9	112
771	0.0005614	4	72	15	140
772	0.0004886	2	68	18	134
773	0.0005106	47	96	15	145
774	0.0004874	51	92	17	133
775	0.0004859	16	67	10	118
776	0.0005907	30	86	19	142
777	0.0004652	27	78	16	129
778	0.0005487	11	68	13	125
779	0.0006042	28	86	9	144
780	0.0005502	17	85	14	153
781	0.0005527	33	86	14	139
782	0.0005552	6	74	13	142
783	0.0006992	4	76	16	148
784	0.0005198	22	79	10	136
785	0.0005689	66	103	14	140
786	0.0005537	28	89	15	150
787	0.0005211	74	91	15	108
788	0.0006624	4	73	12	142
789	0.0005605	51	96	13	141
790	0.0004605	7	60	11	113
791	0.0005337	11	66	13	121
792	0.0004607	15	85	12	155
793	0.0005084	12	71	16	130
794	0.000604	35	91	11	147
795	0.0005605	7	79	17	151
796	0.0005596	21	86	13	151
797	0.0005831	3	63	18	123
798	0.0004819	21	72	9	123
799	0.0006125	7	71	16	135
800	0.0004985	8	73	13	138
801	0.0005123	9	53	12	97
802	0.0004363	14	65	11	116
803	0.0004224	8	54	15	100
804	0.0005492	46	91	11	136
805	0.0005198	18	88	13	158
806	0.0006409	32	87	15	142
807	0.0005897	48	94	16	140
808	0.00052	9	62	13	115
809	0.0004317	4	58	11	112
810	0.000482	18	64	17	110
811	0.0005044	30	77	16	124
812	0.0005452	11	72	8	133
813	0.0005361	19	70	9	121
814	0.0006303	34	82	15	130
815	0.0006263	3	76	10	149
816	0.0005118	58	97	18	136
817	0.0006746	13	77	15	141
818	0.000546	17	77	16	137
819	0.0005293	14	60	15	106
820	0.0005687	8	59	17	110
821	0.0005594	4	66	19	128
822	0.0005921	47	103	13	159
823	0.0006241	14	65	10	116
824	0.0005864	27	93	19	159
825	0.0004719	4	59	11	114
826	0.0005349	16	82	12	148
827	0.0005385	16	75	19	134
828	0.0005632	24	82	11	140
829	0.0006671	45	92	14	139
830	0.0004832	9	64	14	119
831	0.0004827	6	75	12	144
832	0.0006076	4	73	18	142
833	0.0005575	63	110	17	157
834	0.0004437	8	63	12	118
835	0.0005536	12	76	13	140
836	0.0004559	24	76	15	128
837	0.0005601	28	89	14	150
838	0.0005049	34	79	12	124
839	0.0005858	8	72	12	136
840	0.0005672	34	95	12	156
841	0.000466	13	63	11	113
842	0.0006441	0	73	16	146
843	0.0005054	6	65	11	124
844	0.000563	21	76	15	131
845	0.0006172	29	80	12	131
846	0.0005159	6	65	9	124
847	0.0005994	27	98	18	169
848	0.000487	3	65	12	127
849	0.0003888	129	148	19	167
850	0.0006	8	77	14	146
851	0.0005511	11	73	13	135
852	0.0004089	7	58	9	109
853	0.000484	54	96	14	138
854	0.0004998	6	80	13	154
855	0.000489	19	84	15	149
856	0.0005012	14	74	17	134
857	0.0005209	13	76	9	139
858	0.0005672	61	97	11	133
859	0.0005754	54	93	14	132
860	0.0005615	29	90	13	151
861	0.000508	4	74	11	144
862	0.0005001	32	81	14	130
863	0.0006411	12	82	19	152
864	0.0005448	46	88	16	130
865	0.0005595	37	94	16	151
866	0.0006917	37	83	12	129
867	0.0005638	7	61	18	115
868	0.0005418	13	77	14	141
869	0.0005868	34	87	15	140
870	0.0005221	6	68	19	130
871	0.0005611	55	94	18	133
872	0.0005368	10	71	17	132
873	0.0005445	41	91	10	141
874	0.0005437	2	70	15	138
875	0.0004615	1	54	12	107
876	0.0005331	1	62	14	123
877	0.0005078	21	74	10	127
878	0.0005432	23	75	13	127
879	0.0005465	6	81	19	156
880	0.0005136	42	86	15	130
881	0.000473	37	87	11	137
882	0.000519	23	76	16	129
883	0.0005565	41	90	17	139
884	0.0005307	3	69	12	135
885	0.000515	29	88	14	147
886	0.0006342	47	78	13	109
887	0.0005211	4	65	15	126
888	0.0004819	4	57	12	110
889	0.0005138	14	75	9	136
890	0.0006522	11	74	13	137
891	0.000585	23	75	14	127
892	0.0005242	38	80	16	122
893	0.0005155	12	63	11	114
894	0.0005612	17	75	16	133
895	0.0005315	12	71	12	130
896	0.0005733	64	109	18	154
897	0.0004721	8	66	15	124
898	0.0005578	41	98	18	155
899	0.0006845	4	78	12	152
900	0.0004994	23	67	12	111
901	0.0004296	5	64	10	123
902	0.0005967	13	77	17	141
903	0.0006971	11	78	13	145
904	0.0003763	20	68	13	116
905	0.0005355	2	66	17	130
906	0.0006485	28	86	12	144
907	0.0005084	14	61	11	108
908	0.0006038	1	66	10	131
909	0.0004105	11	67	16	123
910	0.0004407	13	72	14	131
911	0.0004508	37	72	12	107
912	0.0006528	5	64	16	123
913	0.0004991	14	71	16	128
914	0.0004238	3	56	13	109
915	0.0005032	25	81	13	137
916	0.0004986	8	78	12	148
917	0.0005718	9	75	15	141
918	0.0005178	16	72	13	128
919	0.0004847	113	143	19	173
920	0.0005662	11	78	17	145
921	0.0006697	14	75	10	136
922	0.000478	17	70	10	123
923	0.0005285	30	72	9	114
924	0.0003756	5	49	7	93
925	0.0005512	2	69	12	136
926	0.0004844	24	77	11	130
927	0.0006012	23	94	14	165
928	0.0005531	3	68	12	133
929	0.0004942	2	65	13	128
930	0.0004893	14	67	10	120
931	0.0005402	12	76	11	140
932	0.0005939	33	87	18	141
933	0.000448	54	83	14	112
934	0.0005726	14	72	15	130
935	0.0005361	26	81	14	136
936	0.0005227	11	78	15	145
937	0.0005796	47	95	17	143
938	0.0005462	25	66	14	107
939	0.0006189	21	75	15	129
940	0.0004883	12	78	17	144
941	0.0005708	51	92	13	133
942	0.0005625	19	83	18	147
943	0.0006106	40	93	12	146
944	0.0006571	35	89	16	143
945	0.0004687	77	116	16	155
946	0.0005819	6	84	13	162
947	0.0005694	21	76	16	131
948	0.0007027	43	107	16	171
949	0.0005199	17	70	10	123
950	0.0004565	12	62	12	112
951	0.0004885	14	69	11	124
952	0.0005952	54	110	17	166
953	0.0006304	93	134	16	175
954	0.0004557	74	100	19	126
955	0.0004869	11	74	11	137
956	0.0005914	30	78	14	126
957	0.0006036	34	91	18	148
958	0.0005674	74	104	17	134
959	0.0004773	41	83	12	125
960	0.0008001	13	76	13	139
961	0.0005133	34	81	12	128
962	0.0005798	54	98	13	142
963	0.000613	54	96	13	138
964	0.0006123	35	92	14	149
965	0.0005331	30	93	16	156
966	0.0006314	17	85	12	153
967	0.0005157	9	66	10	123
968	0.0005495	9	64	9	119
969	0.0005321	45	86	16	127
970	0.0005327	27	78	17	129
971	0.0004742	17	72	15	127
972	0.0005778	72	102	11	132
973	0.0004114	10	71	15	132
974	0.000517	19	70	11	121
975	0.0005378	28	80	11	132
976	0.0004918	26	75	19	124
977	0.0006046	36	80	15	124
978	0.0006278	21	72	19	123
979	0.0004293	72	100	18	128
980	0.0005238	51	100	13	149
981	0.0006852	92	128	19	164
982	0.0005642	49	86	15	123
983	0.000538	40	80	10	120
984	0.0004874	14	76	17	138
985	0.0006233	7	77	17	147
986	0.000558	8	73	19	138
987	0.0005369	17	68	10	119
988	0.0005111	55	95	18	135
989	0.0004414	28	69	14	110
990	0.0005327	26	85	18	144
991	0.00049	51	78	12	105
992	0.0006114	15	66	12	117
993	0.0006075	49	99	15	149
994	0.0006309	21	86	14	151
995	0.0006331	12	87	19	162
996	0.0004848	22	80	13	138
997	0.0005975	37	78	17	119
998	0.0005956	63	107	15	151
999	0.0005785	8	74	19	140
mean	0.000539828	24.337	78.489	13.872	132.641

## Sheet: PowerBalance_SEq
	time	SEq	Bal	Reg	Egal
0	0.000583	36	77	19	118
1	0.0004542	37	82	14	127
2	0.000497	10	77	15	144
3	0.0005205	9	74	11	139
4	0.0005181	47	97	12	147
5	0.0004728	8	70	17	132
6	0.0004959	21	88	19	155
7	0.0004825	19	75	11	131
8	0.0004542	1	67	13	133
9	0.0003528	2	59	10	116
10	0.0004519	6	82	17	158
11	0.0004691	11	79	12	147
12	0.0004872	28	85	13	142
13	0.0004632	10	58	14	106
14	0.0003493	1	59	11	117
15	0.0004731	20	72	13	124
16	0.0005057	19	79	14	139
17	0.000469	14	69	16	124
18	0.0004631	5	73	17	141
19	0.0004775	24	72	11	120
20	0.0004547	8	73	16	138
21	0.0004825	34	79	9	124
22	0.0004621	35	90	15	145
23	0.0003749	4	63	9	122
24	0.00046	10	74	10	138
25	0.0004815	52	106	19	160
26	0.0004916	33	86	17	139
27	0.0004617	10	59	12	108
28	0.000517	15	60	11	105
29	0.000444	6	67	10	128
30	0.0003497	10	70	16	130
31	0.0004948	1	60	14	119
32	0.0004751	15	66	11	117
33	0.0004737	8	84	18	160
34	0.0005208	24	70	9	116
35	0.0003378	0	62	12	124
36	0.0003378	5	65	17	125
37	0.0004498	12	69	13	126
38	0.0005021	17	66	8	115
39	0.0004624	10	73	12	136
40	0.0004721	5	68	12	131
41	0.0004086	3	74	15	145
42	0.0004782	34	75	12	116
43	0.0004629	34	73	15	112
44	0.0004759	46	90	17	134
45	0.0004834	45	94	13	143
46	0.0005174	30	81	16	132
47	0.000496	26	85	14	144
48	0.0004611	6	68	10	130
49	0.0004518	13	67	14	121
50	0.0004656	13	73	13	133
51	0.0004626	5	63	12	121
52	0.0004524	8	65	12	122
53	0.0004609	22	67	11	112
54	0.0005051	12	55	8	98
55	0.000457	18	73	15	128
56	0.0004603	2	78	12	154
57	0.0003544	11	72	14	133
58	0.0004816	43	88	15	133
59	0.0004721	12	86	16	160
60	0.000461	13	92	19	171
61	0.0004667	27	78	14	129
62	0.0004872	44	101	13	158
63	0.0004671	19	72	16	125
64	0.0003591	4	70	13	136
65	0.0003058	4	58	8	112
66	0.0003228	6	58	13	110
67	0.0004702	21	74	12	127
68	0.0004947	22	93	15	164
69	0.0003767	8	74	12	140
70	0.0004788	21	74	16	127
71	0.0004666	42	88	18	134
72	0.0003559	10	68	11	126
73	0.0005073	28	76	18	124
74	0.0004538	18	67	13	116
75	0.0004772	33	73	12	113
76	0.0004807	10	76	11	142
77	0.0005013	45	83	10	121
78	0.0004669	13	72	9	131
79	0.000456	11	71	13	131
80	0.0003434	2	55	13	108
81	0.0004784	11	92	14	173
82	0.0004818	2	68	14	134
83	0.0005301	28	92	15	156
84	0.0003218	3	50	13	97
85	0.0005064	37	84	12	131
86	0.0003628	4	65	13	126
87	0.0004786	4	76	18	148
88	0.0005281	31	90	14	149
89	0.0004828	12	80	12	148
90	0.0004989	15	61	8	107
91	0.0005046	15	71	13	127
92	0.0004575	44	80	14	116
93	0.000298	6	51	12	96
94	0.0004623	14	63	14	112
95	0.0004863	9	82	15	155
96	0.0004454	15	66	19	117
97	0.0002882	0	50	10	100
98	0.0005046	16	78	12	140
99	0.0005441	17	74	11	131
100	0.0004345	39	76	12	113
101	0.0004563	23	89	17	155
102	0.0004549	21	67	10	113
103	0.0005202	8	75	13	142
104	0.0004578	18	76	10	134
105	0.0004742	22	81	16	140
106	0.0003365	2	55	12	108
107	0.0003844	3	70	11	137
108	0.0004885	22	73	11	124
109	0.0006838	13	70	10	127
110	0.0004507	14	71	11	128
111	0.000463	7	75	17	143
112	0.0004597	12	70	14	128
113	0.000466	8	69	12	130
114	0.000459	16	68	17	120
115	0.0005242	41	77	10	113
116	0.0003294	3	70	13	137
117	0.0004583	19	82	16	145
118	0.0005114	32	83	11	134
119	0.0005442	17	69	10	121
120	0.0003257	2	66	9	130
121	0.0004655	24	78	19	132
122	0.000459	4	60	12	116
123	0.0004996	10	62	9	114
124	0.000365	2	58	11	114
125	0.0004548	13	70	14	127
126	0.0004421	8	64	15	120
127	0.0004687	25	81	17	137
128	0.0003507	4	58	11	112
129	0.0005345	15	81	13	147
130	0.0004636	9	65	13	121
131	0.0003397	23	68	10	113
132	0.0004542	9	64	11	119
133	0.0004647	5	73	13	141
134	0.0005318	4	59	19	114
135	0.0005019	47	95	16	143
136	0.0004609	8	57	11	106
137	0.0004656	31	84	12	137
138	0.0004622	34	79	15	124
139	0.0005568	28	84	18	140
140	0.0005245	7	64	11	121
141	0.0004645	27	94	19	161
142	0.0005076	23	82	11	141
143	0.000459	3	71	14	139
144	0.0004725	11	78	12	145
145	0.0004675	27	84	15	141
146	0.0004606	12	73	13	134
147	0.0005125	24	64	13	104
148	0.000368	2	59	14	116
149	0.0004705	18	71	15	124
150	0.0004564	21	70	13	119
151	0.0004729	21	74	13	127
152	0.0004931	18	75	15	132
153	0.0004824	14	74	12	134
154	0.0004535	3	68	16	133
155	0.0004699	41	93	12	145
156	0.0004746	21	79	9	137
157	0.0004746	29	84	17	139
158	0.0005734	35	85	18	135
159	0.0005687	31	90	15	149
160	0.0003304	4	60	9	116
161	0.0005523	40	92	18	144
162	0.000504	57	97	16	137
163	0.0005374	12	66	14	120
164	0.000343	5	60	12	115
165	0.000459	32	89	19	146
166	0.0005434	18	91	19	164
167	0.0003624	8	52	13	96
168	0.0004825	5	73	12	141
169	0.0004628	4	71	12	138
170	0.0006001	2	72	16	142
171	0.0004555	16	70	15	124
172	0.0004475	11	65	11	119
173	0.0004697	24	83	15	142
174	0.0005123	28	83	14	138
175	0.0004783	8	79	16	150
176	0.0005012	9	68	15	127
177	0.0005068	6	76	13	146
178	0.0004819	23	71	10	119
179	0.0005281	3	68	13	133
180	0.0005495	21	74	13	127
181	0.0004577	11	64	16	117
182	0.0005003	14	65	14	116
183	0.0004576	9	60	13	111
184	0.0004778	18	60	12	102
185	0.0003466	3	67	12	131
186	0.000464	11	73	16	135
187	0.0004691	9	69	11	129
188	0.0004689	26	71	12	116
189	0.0005362	18	74	11	130
190	0.0004685	28	87	14	146
191	0.0004661	8	66	12	124
192	0.0004604	3	73	18	143
193	0.0003291	5	71	12	137
194	0.0003129	8	61	12	114
195	0.0004679	21	71	16	121
196	0.0004822	18	75	11	132
197	0.0004615	13	62	13	111
198	0.0005419	3	67	18	131
199	0.0005003	11	59	14	107
200	0.0004755	21	89	17	157
201	0.0004898	28	78	12	128
202	0.0004682	2	76	14	150
203	0.0004515	14	70	13	126
204	0.000353	2	74	12	146
205	0.0005053	4	71	13	138
206	0.0004541	7	72	15	137
207	0.000452	12	56	14	100
208	0.000458	24	69	15	114
209	0.0004667	18	68	13	118
210	0.000456	7	70	16	133
211	0.0004399	11	74	13	137
212	0.0004667	22	86	14	150
213	0.0004447	14	67	11	120
214	0.0004823	22	75	14	128
215	0.0004509	7	69	9	131
216	0.0004365	8	49	10	90
217	0.0004711	6	48	8	90
218	0.0004572	14	74	8	134
219	0.0003552	10	79	12	148
220	0.0004515	4	71	12	138
221	0.0004779	11	82	13	153
222	0.0004568	7	66	12	125
223	0.0004785	9	68	17	127
224	0.0005076	19	77	12	135
225	0.0004583	13	72	12	131
226	0.0004782	15	69	12	123
227	0.0004771	23	72	18	121
228	0.000475	9	62	12	115
229	0.0004581	27	82	18	137
230	0.0004732	17	77	13	137
231	0.0003383	3	59	11	115
232	0.0003889	6	64	13	122
233	0.000453	18	83	19	148
234	0.0005375	30	75	14	120
235	0.000509	20	70	11	120
236	0.0004443	18	77	13	136
237	0.00047	21	75	15	129
238	0.0004473	16	79	18	142
239	0.0004846	5	80	18	155
240	0.00045	13	63	17	113
241	0.0004644	7	69	12	131
242	0.0004933	21	88	14	155
243	0.0004613	21	78	13	135
244	0.0003994	2	68	11	134
245	0.0004643	36	73	15	110
246	0.0004614	16	72	13	128
247	0.000321	5	66	17	127
248	0.000542	21	78	18	135
249	0.0004837	9	69	16	129
250	0.0004737	8	69	12	130
251	0.0004567	6	66	11	126
252	0.0004873	5	74	17	143
253	0.00047	24	80	16	136
254	0.0003517	2	69	12	136
255	0.0004391	9	69	12	129
256	0.0004811	35	87	14	139
257	0.0005949	6	73	13	140
258	0.0003478	0	65	14	130
259	0.0005506	5	71	11	137
260	0.0004963	9	88	16	167
261	0.0004898	21	91	14	161
262	0.0004484	28	78	15	128
263	0.0004535	9	70	12	131
264	0.0004687	0	65	14	130
265	0.0004979	54	90	17	126
266	0.0004544	10	68	17	126
267	0.0004758	14	81	16	148
268	0.0004633	21	87	14	153
269	0.0004853	36	84	13	132
270	0.0004568	12	68	16	124
271	0.0004524	5	74	13	143
272	0.0004711	14	70	14	126
273	0.0004637	24	78	15	132
274	0.0004669	39	86	15	133
275	0.0004684	3	63	14	123
276	0.0004959	10	68	12	126
277	0.0005149	10	69	12	128
278	0.0004939	19	74	13	129
279	0.0003894	2	76	9	150
280	0.0004616	3	72	19	141
281	0.0004591	8	65	11	122
282	0.0004761	44	89	17	134
283	0.0004709	44	91	16	138
284	0.0004797	26	72	10	118
285	0.0004793	43	98	17	153
286	0.0004689	13	66	17	119
287	0.0004618	8	68	17	128
288	0.0005116	34	94	14	154
289	0.0004509	14	60	9	106
290	0.0004503	0	61	16	122
291	0.0004672	30	90	13	150
292	0.0004882	13	71	11	129
293	0.0004532	25	70	10	115
294	0.0004655	13	68	12	123
295	0.0004667	14	67	9	120
296	0.0004782	6	77	18	148
297	0.000499	28	82	17	136
298	0.0005817	24	73	14	122
299	0.0004526	24	86	18	148
300	0.0007399	17	86	14	155
301	0.0004559	13	76	12	139
302	0.0002765	3	53	8	103
303	0.0003548	5	64	9	123
304	0.0004981	31	83	15	135
305	0.0004633	10	82	12	154
306	0.0004881	9	67	15	125
307	0.0004438	12	65	13	118
308	0.0004741	19	81	16	143
309	0.0004749	8	60	8	112
310	0.0004623	27	73	11	119
311	0.0004835	24	72	9	120
312	0.0004704	8	74	17	140
313	0.0004654	7	64	15	121
314	0.0004826	18	70	17	122
315	0.0004595	19	69	11	119
316	0.0005598	21	85	16	149
317	0.0003096	7	66	12	125
318	0.0005297	13	79	16	145
319	0.0003026	0	51	10	102
320	0.0004603	17	74	13	131
321	0.0004963	12	80	12	148
322	0.0004556	24	84	17	144
323	0.0003463	4	62	11	120
324	0.000546	18	72	16	126
325	0.000464	16	80	14	144
326	0.0003524	13	77	10	141
327	0.0004856	15	78	13	141
328	0.0004653	15	67	12	119
329	0.0004598	2	60	16	118
330	0.0004626	23	81	16	139
331	0.0004718	6	62	13	118
332	0.000471	22	76	15	130
333	0.0004686	27	74	11	121
334	0.0004776	1	68	15	135
335	0.0004677	9	80	13	151
336	0.0003526	4	70	15	136
337	0.0005617	16	73	13	130
338	0.0003215	4	73	10	142
339	0.0004523	12	60	12	108
340	0.0004748	49	92	15	135
341	0.0004957	20	83	17	146
342	0.0004818	25	84	11	143
343	0.0003696	3	66	10	129
344	0.0004804	7	70	15	133
345	0.00049	28	87	16	146
346	0.000511	7	69	9	131
347	0.0004741	21	86	13	151
348	0.0003884	3	70	14	137
349	0.0004519	19	80	15	141
350	0.0004454	7	61	14	115
351	0.0006044	38	88	16	138
352	0.0004394	13	74	12	135
353	0.0004654	15	75	10	135
354	0.0004684	24	80	14	136
355	0.0004457	9	55	16	101
356	0.0004927	42	102	16	162
357	0.0005239	35	83	12	131
358	0.0004751	10	76	14	142
359	0.0004435	12	63	11	114
360	0.0004425	16	66	18	116
361	0.0004464	14	62	11	110
362	0.0005198	16	70	18	124
363	0.0004525	21	74	14	127
364	0.0003639	4	69	16	134
365	0.00049	13	65	12	117
366	0.0004574	19	65	9	111
367	0.0004531	8	66	17	124
368	0.0004719	19	70	11	121
369	0.0004551	9	69	10	129
370	0.0004601	29	90	13	151
371	0.0004654	31	81	15	131
372	0.0005059	22	76	19	130
373	0.0004889	22	78	12	134
374	0.0004799	19	86	17	153
375	0.0004766	42	95	19	148
376	0.0004982	15	77	17	139
377	0.0003531	15	65	9	115
378	0.0004598	16	77	19	138
379	0.0004723	36	93	16	150
380	0.000532	14	72	14	130
381	0.0004624	18	77	15	136
382	0.0004915	35	84	13	133
383	0.000476	37	80	11	123
384	0.0004494	14	76	13	138
385	0.0005046	48	111	17	174
386	0.0004625	35	75	10	115
387	0.0005255	32	79	12	126
388	0.0004718	30	74	17	118
389	0.0005015	4	77	15	150
390	0.0004576	23	82	17	141
391	0.0005071	18	62	15	106
392	0.0004904	4	73	17	142
393	0.0004764	20	69	9	118
394	0.0004733	35	82	10	129
395	0.0004798	9	64	11	119
396	0.0004998	27	86	17	145
397	0.0003266	3	48	9	93
398	0.0003494	12	62	10	112
399	0.0004724	10	76	13	142
400	0.0003832	3	69	16	135
401	0.0003157	1	50	12	99
402	0.0004583	47	102	13	157
403	0.0004782	8	68	17	128
404	0.0004978	25	80	12	135
405	0.0004772	16	81	17	146
406	0.0003552	4	56	11	108
407	0.0004687	4	68	16	132
408	0.0004542	9	59	16	109
409	0.0004684	29	84	16	139
410	0.0004775	1	71	18	141
411	0.00035	2	63	10	124
412	0.00033	12	71	12	130
413	0.0005204	69	102	15	135
414	0.0004659	12	76	11	140
415	0.0005158	33	81	16	129
416	0.0005328	27	62	13	97
417	0.0004495	42	95	16	148
418	0.0003513	4	59	11	114
419	0.0005247	55	103	18	151
420	0.0003294	1	62	13	123
421	0.0005044	17	60	14	103
422	0.0004772	20	88	14	156
423	0.000446	5	62	12	119
424	0.0005696	31	85	13	139
425	0.0004724	21	78	11	135
426	0.0004537	24	97	18	170
427	0.000475	16	72	16	128
428	0.0004848	29	85	11	141
429	0.0004522	22	73	15	124
430	0.0004789	45	79	10	113
431	0.0005047	5	70	11	135
432	0.0004499	13	76	18	139
433	0.0005139	46	119	14	192
434	0.0004564	21	69	15	117
435	0.0004614	9	65	13	121
436	0.000348	4	70	13	136
437	0.0003084	5	62	11	119
438	0.0004904	8	78	11	148
439	0.0004714	7	64	17	121
440	0.0004928	20	76	13	132
441	0.0003601	3	53	13	103
442	0.0005518	42	95	14	148
443	0.0004515	21	68	16	115
444	0.0005416	5	66	12	127
445	0.0004708	42	85	18	128
446	0.0003222	11	61	11	111
447	0.0004775	66	109	13	152
448	0.0004571	7	67	13	127
449	0.0004666	29	74	12	119
450	0.0004511	8	67	15	126
451	0.0003611	7	55	11	103
452	0.0004565	4	57	11	110
453	0.000464	6	54	14	102
454	0.0004641	9	83	12	157
455	0.0004733	18	72	10	126
456	0.0004953	8	66	13	124
457	0.0004793	32	97	16	162
458	0.0005197	23	71	11	119
459	0.0004797	17	65	9	113
460	0.0004773	51	104	19	157
461	0.0004808	31	76	13	121
462	0.0003524	2	52	8	102
463	0.000484	1	65	13	129
464	0.0004761	26	77	12	128
465	0.0004555	11	78	12	145
466	0.0002914	9	58	9	107
467	0.0004621	13	63	10	113
468	0.0004721	9	64	11	119
469	0.0004805	7	76	15	145
470	0.0004517	12	68	11	124
471	0.0004812	42	94	16	146
472	0.0004647	2	57	10	112
473	0.000485	2	72	14	142
474	0.0004741	12	78	13	144
475	0.000461	1	59	16	117
476	0.0005196	6	68	16	130
477	0.0004448	10	69	15	128
478	0.0005522	19	70	11	121
479	0.0004933	9	79	10	149
480	0.0004632	8	60	10	112
481	0.0004619	4	70	19	136
482	0.0004702	11	82	16	153
483	0.0005251	43	88	17	133
484	0.0004772	26	69	13	112
485	0.0004607	12	66	9	120
486	0.0004779	10	69	14	128
487	0.0003676	7	62	12	117
488	0.0004996	18	83	17	148
489	0.0004761	29	86	14	143
490	0.0004606	29	86	14	143
491	0.0004607	7	72	13	137
492	0.000463	48	84	18	120
493	0.0004641	17	75	10	133
494	0.0005867	40	89	16	138
495	0.0004921	14	71	16	128
496	0.0003247	5	54	9	103
497	0.0005308	6	52	13	98
498	0.0005138	13	69	13	125
499	0.0005109	2	60	17	118
500	0.0004769	43	96	15	149
501	0.0005443	22	73	14	124
502	0.0004712	16	80	15	144
503	0.0005172	32	83	14	134
504	0.0004541	3	57	12	111
505	0.0004635	35	95	19	155
506	0.0004733	6	86	16	166
507	0.0004548	32	79	16	126
508	0.0004717	30	87	14	144
509	0.0004583	7	63	12	119
510	0.0004905	0	70	10	140
511	0.0004838	22	70	14	118
512	0.0004717	2	80	16	158
513	0.000458	14	73	17	132
514	0.0004766	31	77	15	123
515	0.0004734	23	82	18	141
516	0.0004453	6	52	8	98
517	0.0004974	35	93	13	151
518	0.0004733	39	96	19	153
519	0.0004751	24	75	16	126
520	0.0003403	9	70	11	131
521	0.0004674	7	68	11	129
522	0.0003427	1	61	9	121
523	0.000482	17	71	10	125
524	0.0004755	1	67	10	133
525	0.0004691	6	74	15	142
526	0.0006038	14	69	17	124
527	0.0004673	10	73	13	136
528	0.0004594	10	78	15	146
529	0.000449	10	64	15	118
530	0.0004579	6	73	16	140
531	0.0004617	8	71	13	134
532	0.0004467	21	80	17	139
533	0.0004415	10	65	11	120
534	0.0005248	33	91	14	149
535	0.0004548	14	77	12	140
536	0.0003295	1	76	16	151
537	0.0004728	22	86	13	150
538	0.0004592	3	63	19	123
539	0.0003636	3	71	15	139
540	0.0004764	8	68	12	128
541	0.000456	12	65	12	118
542	0.0004671	21	79	17	137
543	0.0006196	21	70	16	119
544	0.0004499	48	93	19	138
545	0.0004482	12	76	19	140
546	0.000499	1	63	11	125
547	0.0003542	11	70	9	129
548	0.0004615	31	75	12	119
549	0.0004662	13	75	10	137
550	0.0004699	7	74	10	141
551	0.0004728	21	75	14	129
552	0.0003966	3	76	18	149
553	0.0003561	2	60	13	118
554	0.0005152	10	69	8	128
555	0.0004408	11	83	15	155
556	0.0003138	9	65	11	121
557	0.0003712	1	65	13	129
558	0.0004561	10	70	15	130
559	0.0004717	14	64	13	114
560	0.0004935	9	71	14	133
561	0.0004836	8	68	11	128
562	0.0005761	64	106	18	148
563	0.0004646	24	88	19	152
564	0.0004658	20	78	15	136
565	0.0003493	5	59	18	113
566	0.0004885	25	85	13	145
567	0.0005309	29	83	13	137
568	0.0004807	27	86	11	145
569	0.0004815	20	69	14	118
570	0.0004712	6	66	14	126
571	0.0004478	16	64	17	112
572	0.0005057	20	73	8	126
573	0.0004954	11	70	14	129
574	0.0005429	33	96	15	159
575	0.0003435	8	65	13	122
576	0.0004943	17	69	11	121
577	0.0004682	39	101	18	163
578	0.0003229	6	61	18	116
579	0.0004597	15	71	19	127
580	0.0004981	28	84	16	140
581	0.0004592	10	77	13	144
582	0.0004507	13	59	17	105
583	0.000497	2	69	13	136
584	0.0004614	12	70	13	128
585	0.0004773	9	70	11	131
586	0.0003278	2	59	12	116
587	0.0004469	8	69	12	130
588	0.0004551	12	68	14	124
589	0.0004729	34	93	11	152
590	0.0004628	2	79	19	156
591	0.0003132	0	62	16	124
592	0.0004868	9	77	19	145
593	0.0004797	31	88	15	145
594	0.0004451	14	69	11	124
595	0.0004632	20	76	14	132
596	0.0004769	17	76	13	135
597	0.000451	18	55	13	92
598	0.000338	1	61	16	121
599	0.0004405	7	65	10	123
600	0.0004902	53	91	14	129
601	0.0004565	42	94	15	146
602	0.000461	8	70	19	132
603	0.0003414	2	70	12	138
604	0.0004738	24	78	19	132
605	0.0003639	2	77	15	152
606	0.000473	35	92	13	149
607	0.0003572	1	57	10	113
608	0.00056	21	83	13	145
609	0.0004682	29	93	15	157
610	0.000357	4	75	13	146
611	0.0003216	5	66	9	127
612	0.000474	12	76	12	140
613	0.0004715	31	88	18	145
614	0.0004536	24	74	15	124
615	0.000335	4	51	11	98
616	0.00047	65	94	11	123
617	0.0004806	15	88	10	161
618	0.0004541	12	78	17	144
619	0.000484	13	72	14	131
620	0.0005085	30	81	13	132
621	0.0004522	11	68	10	125
622	0.0004716	12	70	16	128
623	0.0004954	15	74	13	133
624	0.0004714	12	68	10	124
625	0.0003042	0	54	12	108
626	0.0004714	26	81	12	136
627	0.0003542	3	66	18	129
628	0.0004941	3	72	15	141
629	0.0003621	4	59	12	114
630	0.0003692	16	77	15	138
631	0.0004663	1	57	12	113
632	0.000519	12	73	13	134
633	0.0005648	63	105	15	147
634	0.0005007	11	68	11	125
635	0.000454	3	75	14	147
636	0.0004808	23	80	15	137
637	0.0004567	12	72	13	132
638	0.0004907	29	72	13	115
639	0.0004749	0	73	17	146
640	0.0003656	4	54	17	104
641	0.000508	25	72	15	119
642	0.0004776	36	97	15	158
643	0.0004514	19	68	14	117
644	0.0004477	8	62	12	116
645	0.0004581	16	62	9	108
646	0.0004568	17	62	9	107
647	0.0003176	1	51	10	101
648	0.0004509	1	69	17	137
649	0.0003612	3	74	16	145
650	0.0003513	2	55	11	108
651	0.0004566	24	70	12	116
652	0.0004536	4	71	11	138
653	0.0003699	1	68	12	135
654	0.0004695	24	91	16	158
655	0.0004866	36	92	18	148
656	0.0003631	8	78	13	148
657	0.0004503	60	91	16	122
658	0.0004857	20	81	11	142
659	0.0005394	10	69	12	128
660	0.0004702	3	58	13	113
661	0.0004658	15	70	16	125
662	0.0003599	11	64	10	117
663	0.0004673	15	73	12	131
664	0.0004647	55	92	16	129
665	0.0004686	16	71	15	126
666	0.0004584	29	76	14	123
667	0.0004693	17	84	17	151
668	0.0004741	45	83	17	121
669	0.0004666	35	88	13	141
670	0.0005003	15	89	12	163
671	0.0004896	2	61	9	120
672	0.000306	3	64	12	125
673	0.0004708	33	79	12	125
674	0.0004531	26	87	12	148
675	0.0004754	31	84	16	137
676	0.0005554	23	91	11	159
677	0.0004511	12	66	14	120
678	0.0004667	26	82	13	138
679	0.0004735	2	60	12	118
680	0.000479	28	82	11	136
681	0.0004685	26	70	8	114
682	0.0005233	12	77	15	142
683	0.0004778	21	90	14	159
684	0.0003247	21	69	14	117
685	0.0004601	8	67	15	126
686	0.0005087	25	74	12	123
687	0.0004567	17	75	12	133
688	0.0004562	10	67	11	124
689	0.0004766	42	92	15	142
690	0.0004609	24	80	14	136
691	0.000445	11	66	13	121
692	0.0003176	1	56	11	111
693	0.000438	3	59	16	115
694	0.0004473	9	67	13	125
695	0.0003531	4	81	13	158
696	0.0003527	9	56	9	103
697	0.0005131	17	67	10	117
698	0.0003451	5	64	15	123
699	0.000341	1	51	10	101
700	0.000486	24	74	18	124
701	0.0003332	0	60	9	120
702	0.0004692	26	79	18	132
703	0.000557	2	63	18	124
704	0.0004853	28	82	16	136
705	0.0005341	13	81	13	149
706	0.0003566	7	66	16	125
707	0.0004772	24	79	17	134
708	0.0004967	41	97	18	153
709	0.0005013	14	64	9	114
710	0.0005021	28	82	13	136
711	0.0004803	29	93	16	157
712	0.0004574	16	66	10	116
713	0.0004768	24	72	18	120
714	0.0003468	5	67	14	129
715	0.0004634	32	86	13	140
716	0.0004641	19	68	17	117
717	0.0004712	46	89	13	132
718	0.0003223	13	60	10	107
719	0.0004441	0	55	12	110
720	0.0004691	14	80	11	146
721	0.0004735	14	88	13	162
722	0.0004808	24	67	12	110
723	0.000493	19	82	18	145
724	0.0004625	9	70	13	131
725	0.0004593	8	69	16	130
726	0.0003604	12	69	13	126
727	0.0004736	28	91	15	154
728	0.0004831	18	76	10	134
729	0.0004918	75	110	19	145
730	0.0004784	13	81	12	149
731	0.0004638	16	72	10	128
732	0.0004714	13	70	15	127
733	0.0004628	15	61	10	107
734	0.0004629	19	70	16	121
735	0.0004525	4	59	8	114
736	0.000444	19	81	13	143
737	0.0004702	3	69	13	135
738	0.0004885	42	91	11	140
739	0.0005637	44	95	18	146
740	0.0004789	19	65	16	111
741	0.0004881	39	85	16	131
742	0.0005016	9	66	12	123
743	0.0005381	15	74	12	133
744	0.0004762	14	67	12	120
745	0.0004679	28	89	19	150
746	0.00045	11	70	11	129
747	0.0003601	5	68	14	131
748	0.0004557	15	79	14	143
749	0.0004677	37	86	14	135
750	0.0004541	25	83	12	141
751	0.0003417	7	65	11	123
752	0.0004821	15	70	15	125
753	0.0004902	73	100	16	127
754	0.0004559	18	64	11	110
755	0.000335	22	70	11	118
756	0.000462	16	68	10	120
757	0.0003427	3	59	9	115
758	0.0005061	20	67	13	114
759	0.0003404	0	66	12	132
760	0.0005425	4	67	11	130
761	0.0004733	26	85	15	144
762	0.0005484	40	96	13	152
763	0.0004697	11	74	14	137
764	0.000449	10	70	15	130
765	0.0004497	7	67	15	127
766	0.0004766	39	86	14	133
767	0.0004444	8	64	10	120
768	0.0004673	7	80	13	153
769	0.0004619	9	74	13	139
770	0.0004646	20	66	9	112
771	0.00051	34	88	15	142
772	0.000297	7	66	14	125
773	0.0003397	1	68	10	135
774	0.0004716	9	73	14	137
775	0.0004644	16	67	10	118
776	0.0004792	30	86	19	142
777	0.0004851	27	78	16	129
778	0.000522	29	77	11	125
779	0.0004589	12	77	14	142
780	0.0004741	28	94	14	160
781	0.0004638	6	66	11	126
782	0.0004703	26	84	13	142
783	0.0004862	4	76	16	148
784	0.0003745	12	72	10	132
785	0.0004853	21	85	12	149
786	0.0004738	8	78	15	148
787	0.0004996	2	55	14	108
788	0.0003389	4	73	12	142
789	0.0004796	27	86	13	145
790	0.0004645	7	60	11	113
791	0.0004835	11	66	13	121
792	0.0004549	3	80	12	157
793	0.0004752	29	79	16	129
794	0.0004514	35	91	11	147
795	0.0004798	7	79	17	151
796	0.000518	5	74	15	143
797	0.0004658	3	63	18	123
798	0.0005013	21	72	9	123
799	0.0004511	7	71	16	135
800	0.0003718	8	73	13	138
801	0.0002976	5	51	12	97
802	0.0003204	14	65	11	116
803	0.0004735	8	54	15	100
804	0.0004578	3	68	15	133
805	0.0005451	13	86	17	159
806	0.0004664	14	79	18	144
807	0.0004623	48	94	16	140
808	0.0004902	9	62	13	115
809	0.0004458	4	58	11	112
810	0.000385	7	63	18	119
811	0.0004702	16	70	15	124
812	0.000498	9	72	10	135
813	0.0004609	19	70	9	121
814	0.0004628	27	92	16	157
815	0.0004497	29	86	14	143
816	0.0004794	17	69	15	121
817	0.0005032	13	77	15	141
818	0.000486	17	77	16	137
819	0.0004488	14	60	15	106
820	0.0004553	8	59	17	110
821	0.0003332	4	66	19	128
822	0.0004655	13	85	13	157
823	0.0004537	14	65	10	116
824	0.0004668	27	93	19	159
825	0.0003341	4	59	11	114
826	0.000464	15	79	12	143
827	0.0004873	16	75	19	134
828	0.0003501	8	68	11	128
829	0.0005258	45	92	14	139
830	0.0004622	9	64	14	119
831	0.0004528	6	75	12	144
832	0.0004821	4	73	18	142
833	0.0005773	12	81	16	150
834	0.0004617	8	63	12	118
835	0.0003888	3	69	8	135
836	0.0004708	1	57	13	113
837	0.0004712	2	73	14	144
838	0.0005144	34	79	12	124
839	0.000458	4	71	10	138
840	0.0004651	4	77	12	150
841	0.0005464	26	70	11	114
842	0.000495	11	79	13	147
843	0.0003464	6	65	11	124
844	0.0004734	21	76	15	131
845	0.0004948	16	77	17	138
846	0.0004709	6	65	9	124
847	0.0004834	43	111	18	179
848	0.0003515	3	65	12	127
849	0.0004438	5	64	12	123
850	0.0005038	8	77	14	146
851	0.0004487	11	73	13	135
852	0.0004622	7	58	9	109
853	0.0004389	9	68	17	127
854	0.0004717	6	80	13	154
855	0.0004578	13	73	14	133
856	0.000449	10	70	17	130
857	0.0005464	2	70	10	138
858	0.0003671	6	61	9	116
859	0.000492	54	93	14	132
860	0.0004681	4	76	13	148
861	0.0003278	4	74	11	144
862	0.0003334	5	58	10	111
863	0.0004502	12	82	19	152
864	0.0004399	25	78	16	131
865	0.0004933	37	94	16	151
866	0.0004678	16	74	17	132
867	0.0004337	7	61	18	115
868	0.0004617	23	81	14	139
869	0.000465	9	73	15	137
870	0.0004638	6	68	19	130
871	0.0004865	55	94	18	133
872	0.0004648	28	83	16	138
873	0.0004677	11	77	10	143
874	0.0004576	2	70	15	138
875	0.0003277	1	54	12	107
876	0.0003584	1	62	14	123
877	0.000457	21	74	10	127
878	0.0003265	2	66	10	130
879	0.0004823	6	81	19	156
880	0.0003271	6	65	12	124
881	0.0004756	13	74	11	135
882	0.0003483	23	76	16	129
883	0.0004769	6	68	17	130
884	0.0003428	3	69	12	135
885	0.00048	12	79	17	146
886	0.0004699	47	78	13	109
887	0.0004695	41	92	17	143
888	0.0004865	33	75	12	117
889	0.0004827	14	75	9	136
890	0.0005306	11	74	13	137
891	0.0003439	0	58	14	116
892	0.0003355	13	61	19	109
893	0.0004065	12	63	11	114
894	0.0004551	17	75	16	133
895	0.0004732	11	76	17	141
896	0.0004778	4	72	18	140
897	0.0004525	18	61	10	104
898	0.0004911	31	92	18	153
899	0.0004011	4	78	12	152
900	0.0004601	23	67	12	111
901	0.0003018	6	65	10	124
902	0.0004733	13	77	17	141
903	0.0003556	5	74	13	143
904	0.000457	20	68	13	116
905	0.0004755	2	66	17	130
906	0.0004984	28	86	12	144
907	0.0004464	14	61	11	108
908	0.0004727	45	89	15	133
909	0.0004718	22	75	15	128
910	0.0004898	13	72	14	131
911	0.0004768	19	65	12	111
912	0.0004906	21	69	14	117
913	0.0005116	14	71	16	128
914	0.0005206	3	56	13	109
915	0.0004369	25	81	13	137
916	0.0003639	8	78	12	148
917	0.0004541	9	75	15	141
918	0.0003341	2	62	13	122
919	0.0005207	10	78	16	146
920	0.0004651	11	78	17	145
921	0.0004847	14	75	10	136
922	0.0004968	17	70	10	123
923	0.0003448	7	61	9	115
924	0.0002649	5	49	7	93
925	0.0003342	2	69	12	136
926	0.0003351	1	68	11	135
927	0.0004681	8	83	12	158
928	0.0003568	3	68	12	133
929	0.0003346	2	65	13	128
930	0.0003548	14	67	10	120
931	0.0003518	5	70	10	135
932	0.0004637	9	78	17	147
933	0.0004571	14	72	12	130
934	0.0003818	5	62	9	119
935	0.0004726	9	72	18	135
936	0.0004625	11	78	15	145
937	0.0004697	10	68	15	126
938	0.0004566	16	71	14	126
939	0.0004644	21	75	15	129
940	0.0004567	12	78	17	144
941	0.0005319	15	73	13	131
942	0.0004556	19	83	18	147
943	0.0004802	7	79	18	151
944	0.0005492	35	89	16	143
945	0.0003739	4	70	13	136
946	0.000466	6	84	13	162
947	0.0004652	7	69	13	131
948	0.0004729	42	101	14	160
949	0.0005057	6	62	12	118
950	0.0004515	12	62	12	112
951	0.0004498	14	69	11	124
952	0.0005034	30	95	17	160
953	0.000475	42	103	16	164
954	0.0004968	15	59	9	103
955	0.0004627	8	78	17	148
956	0.0004736	30	78	14	126
957	0.0004577	13	77	13	141
958	0.0005013	8	64	14	120
959	0.000502	14	68	13	122
960	0.0004626	3	69	13	135
961	0.0004948	9	65	12	121
962	0.0003708	13	71	13	129
963	0.0004725	54	96	13	138
964	0.0003296	5	70	11	135
965	0.0005013	14	82	16	150
966	0.0004647	17	85	12	153
967	0.0004705	9	66	10	123
968	0.0003583	9	64	9	119
969	0.0004717	6	65	18	124
970	0.0004814	61	101	17	141
971	0.0004599	17	72	15	127
972	0.0004567	20	76	11	132
973	0.0004652	17	72	14	127
974	0.0005941	19	70	11	121
975	0.0004853	28	80	11	132
976	0.0004666	13	70	13	127
977	0.0004605	16	71	15	126
978	0.0004678	21	72	19	123
979	0.0003491	5	57	13	109
980	0.0004795	27	85	13	143
981	0.0005243	16	90	14	164
982	0.0004912	16	71	14	126
983	0.0004572	15	69	10	123
984	0.0004643	14	76	17	138
985	0.0004601	7	77	17	147
986	0.0004604	8	73	19	138
987	0.0004546	17	68	10	119
988	0.0004779	7	73	19	139
989	0.0003166	8	55	8	102
990	0.0004676	23	82	12	141
991	0.0004459	26	83	18	140
992	0.0004843	15	66	12	117
993	0.0004496	14	75	16	136
994	0.0004103	3	70	13	137
995	0.0006025	12	87	19	162
996	0.0004901	22	80	13	138
997	0.0004469	17	74	17	131
998	0.0004573	18	80	12	142
999	0.0004559	8	74	19	140
mean	0.000457114	16.279	73.688	13.595	131.097

## Sheet: PowerBalance_Bal
	time	SEq	Bal	Reg	Egal
0	0.0004652	36	77	19	118
1	0.00046	14	73	14	132
2	0.0004992	10	77	15	144
3	0.0004689	9	74	11	139
4	0.0005088	50	94	17	138
5	0.0004613	8	70	17	132
6	0.0004767	21	88	19	155
7	0.0004555	19	75	11	131
8	0.0004389	1	67	13	133
9	0.0003574	2	59	10	116
10	0.0004574	6	82	17	158
11	0.0005245	11	79	12	147
12	0.0004752	28	85	13	142
13	0.0004691	10	58	14	106
14	0.000354	1	59	11	117
15	0.0004811	24	69	10	114
16	0.0004522	19	79	14	139
17	0.0004612	14	69	16	124
18	0.0004677	5	73	17	141
19	0.0005413	24	72	11	120
20	0.0004608	8	73	16	138
21	0.0004867	34	79	9	124
22	0.0004807	35	90	15	145
23	0.000363	4	63	9	122
24	0.0004539	10	74	10	138
25	0.0004788	52	106	19	160
26	0.0004725	33	86	17	139
27	0.0004585	10	59	12	108
28	0.0004734	15	60	11	105
29	0.0004592	6	67	10	128
30	0.0003465	10	70	16	130
31	0.0004845	1	60	14	119
32	0.0004779	15	66	11	117
33	0.0004822	25	81	11	137
34	0.0004694	24	70	9	116
35	0.0003415	0	62	12	124
36	0.0003351	5	65	17	125
37	0.0004707	21	70	13	119
38	0.000455	19	64	9	109
39	0.0004529	10	73	12	136
40	0.0004751	5	68	12	131
41	0.0003697	3	74	15	145
42	0.00046	34	75	12	116
43	0.0004641	34	73	15	112
44	0.000465	46	90	17	134
45	0.0004796	47	88	13	129
46	0.0004616	30	81	16	132
47	0.0004617	26	85	14	144
48	0.0004963	6	68	10	130
49	0.0004525	13	67	14	121
50	0.0005004	13	73	13	133
51	0.0004452	5	63	12	121
52	0.0005056	8	65	12	122
53	0.0004384	22	67	11	112
54	0.0004545	12	55	8	98
55	0.0004564	20	62	13	104
56	0.0004887	2	78	12	154
57	0.0003534	11	72	14	133
58	0.0005226	43	88	15	133
59	0.0005207	12	86	16	160
60	0.0004612	22	86	17	150
61	0.0004736	27	78	14	129
62	0.0005273	44	99	16	154
63	0.0004584	23	64	18	105
64	0.000392	4	70	13	136
65	0.0003014	4	58	8	112
66	0.0003104	6	58	13	110
67	0.0004612	21	74	12	127
68	0.0004754	22	93	15	164
69	0.0004741	7	69	12	131
70	0.0004694	21	74	16	127
71	0.0004813	42	88	18	134
72	0.0003765	10	68	11	126
73	0.000471	28	76	18	124
74	0.000499	18	67	13	116
75	0.0004971	33	73	12	113
76	0.000459	10	76	11	142
77	0.0005026	45	83	10	121
78	0.000498	13	72	9	131
79	0.0004697	23	83	16	143
80	0.0003154	2	55	13	108
81	0.0004685	12	91	13	170
82	0.0004823	2	68	14	134
83	0.000508	28	92	15	156
84	0.0003294	3	50	13	97
85	0.000458	37	84	12	131
86	0.0003612	4	65	13	126
87	0.0005192	4	76	18	148
88	0.0004878	31	90	14	149
89	0.0004675	23	83	15	143
90	0.0004478	15	61	8	107
91	0.0005002	15	71	13	127
92	0.0004623	44	80	14	116
93	0.0003057	6	51	12	96
94	0.0004537	14	63	14	112
95	0.0004493	14	77	13	140
96	0.0004391	15	66	19	117
97	0.0003144	0	50	10	100
98	0.0004665	16	78	12	140
99	0.0004839	17	74	11	131
100	0.0004365	39	76	12	113
101	0.0005523	29	83	13	137
102	0.0004607	21	67	10	113
103	0.000507	8	75	13	142
104	0.0005532	18	76	10	134
105	0.0004578	22	81	16	140
106	0.0003148	2	55	12	108
107	0.0003344	3	70	11	137
108	0.0004839	27	72	18	117
109	0.0004583	13	70	10	127
110	0.0004518	14	71	11	128
111	0.0004732	7	75	17	143
112	0.000446	12	70	14	128
113	0.0004678	8	69	12	130
114	0.0004624	16	68	17	120
115	0.0004653	41	77	10	113
116	0.0003346	3	70	13	137
117	0.000491	19	73	8	127
118	0.0004689	32	83	11	134
119	0.0004914	17	69	10	121
120	0.0003293	2	66	9	130
121	0.0004692	32	77	12	122
122	0.0003484	4	60	12	116
123	0.0004813	10	62	9	114
124	0.0003197	2	58	11	114
125	0.000457	13	70	14	127
126	0.0004622	8	64	15	120
127	0.0005649	25	81	17	137
128	0.0003889	4	58	11	112
129	0.0004939	15	81	13	147
130	0.0004595	9	65	13	121
131	0.0003431	23	68	10	113
132	0.0004482	9	64	11	119
133	0.000484	5	73	13	141
134	0.0004587	4	59	19	114
135	0.0005031	47	95	16	143
136	0.0004461	9	56	10	103
137	0.0004767	31	84	12	137
138	0.0004796	42	77	16	112
139	0.0004837	28	84	18	140
140	0.0004698	7	64	11	121
141	0.0004546	27	94	19	161
142	0.0004804	23	82	11	141
143	0.0004624	3	71	14	139
144	0.0004659	11	78	12	145
145	0.0004593	31	81	16	131
146	0.0006711	12	73	13	134
147	0.0004617	24	64	13	104
148	0.0004739	2	59	14	116
149	0.000488	18	71	15	124
150	0.0004458	21	70	13	119
151	0.000469	21	74	13	127
152	0.0004665	18	75	15	132
153	0.0005022	1	70	13	139
154	0.000461	3	68	16	133
155	0.0005288	41	93	12	145
156	0.0005165	23	77	9	131
157	0.0004627	37	81	12	125
158	0.0004723	35	85	18	135
159	0.0004638	41	86	10	131
160	0.0003755	4	60	9	116
161	0.0004837	46	91	14	136
162	0.0004719	57	97	16	137
163	0.0004573	12	66	14	120
164	0.0003054	5	60	12	115
165	0.0005354	43	84	12	125
166	0.0005322	18	91	19	164
167	0.0003422	8	52	13	96
168	0.0004462	5	73	12	141
169	0.0004576	4	71	12	138
170	0.0004805	2	72	16	142
171	0.000448	16	70	15	124
172	0.0004523	12	63	13	114
173	0.0004755	24	83	15	142
174	0.00047	29	81	11	133
175	0.0004865	8	79	16	150
176	0.0004417	9	68	15	127
177	0.0004648	6	76	13	146
178	0.0004792	23	71	10	119
179	0.0004553	3	68	13	133
180	0.0003877	21	74	13	127
181	0.0004527	11	64	16	117
182	0.0004607	20	64	12	108
183	0.0005575	9	60	13	111
184	0.0004772	18	60	12	102
185	0.0003556	3	67	12	131
186	0.0004413	11	69	15	127
187	0.0004756	9	69	11	129
188	0.0004933	26	71	12	116
189	0.0005133	18	74	11	130
190	0.0004801	28	87	14	146
191	0.0004577	8	66	12	124
192	0.0004643	3	73	18	143
193	0.0003244	5	71	12	137
194	0.000322	8	61	12	114
195	0.0004738	21	71	16	121
196	0.0004704	18	75	11	132
197	0.0004847	13	62	13	111
198	0.0004854	3	67	18	131
199	0.0004564	11	59	14	107
200	0.0004645	21	89	17	157
201	0.0005097	28	78	12	128
202	0.0003321	2	76	14	150
203	0.0005173	14	70	13	126
204	0.0004065	2	74	12	146
205	0.0004978	4	71	13	138
206	0.0005291	7	72	15	137
207	0.0004693	12	56	14	100
208	0.0004597	24	69	15	114
209	0.0004631	18	68	13	118
210	0.0004504	7	70	16	133
211	0.0004499	16	72	12	128
212	0.0004538	22	86	14	150
213	0.0004792	14	67	11	120
214	0.0004505	22	75	14	128
215	0.0005131	7	69	9	131
216	0.0004452	8	49	10	90
217	0.0004656	6	48	8	90
218	0.000449	14	74	8	134
219	0.0004797	10	79	12	148
220	0.0004423	4	71	12	138
221	0.0004821	11	82	13	153
222	0.0004415	7	66	12	125
223	0.0004521	9	68	17	127
224	0.0004564	19	77	12	135
225	0.0004555	13	72	12	131
226	0.0005259	15	69	12	123
227	0.0004573	30	70	17	110
228	0.000446	9	62	12	115
229	0.0004573	27	82	18	137
230	0.000451	17	77	13	137
231	0.000377	3	59	11	115
232	0.0003384	6	64	13	122
233	0.0004666	21	75	11	129
234	0.0004858	30	75	14	120
235	0.0004798	20	70	11	120
236	0.000504	24	76	13	128
237	0.0004625	21	75	15	129
238	0.0004574	16	79	18	142
239	0.0004783	5	80	18	155
240	0.0005095	13	63	17	113
241	0.0004619	7	69	12	131
242	0.0005533	21	88	14	155
243	0.0004622	21	78	13	135
244	0.0003701	2	68	11	134
245	0.0004544	38	72	11	106
246	0.0004577	16	72	13	128
247	0.0003238	5	66	17	127
248	0.0004796	21	78	18	135
249	0.000455	9	69	16	129
250	0.0005314	8	69	12	130
251	0.0004773	6	66	11	126
252	0.0005137	5	74	17	143
253	0.0004754	24	80	16	136
254	0.0004638	13	73	11	133
255	0.0004369	15	67	17	119
256	0.0004672	35	87	14	139
257	0.0005114	6	73	13	140
258	0.0003787	0	65	14	130
259	0.0004689	5	71	11	137
260	0.0005595	9	88	16	167
261	0.0004626	21	91	14	161
262	0.0004491	28	78	15	128
263	0.0004586	9	70	12	131
264	0.000522	0	65	14	130
265	0.0004671	54	90	17	126
266	0.0004579	15	64	11	113
267	0.0005205	14	81	16	148
268	0.0004621	21	87	14	153
269	0.0004844	36	84	13	132
270	0.0004366	3	65	16	127
271	0.0003954	5	74	13	143
272	0.0004582	14	70	14	126
273	0.0004789	24	78	15	132
274	0.0004613	39	86	15	133
275	0.0004522	3	63	14	123
276	0.0004761	10	68	12	126
277	0.0004572	10	69	12	128
278	0.0004667	19	74	13	129
279	0.0004532	2	76	9	150
280	0.0005617	3	72	19	141
281	0.0005057	8	65	11	122
282	0.0005168	59	85	14	111
283	0.0004619	50	83	12	116
284	0.0004659	26	72	10	118
285	0.0005301	43	98	17	153
286	0.0004709	13	66	17	119
287	0.0004685	8	68	17	128
288	0.000463	43	84	12	125
289	0.0004516	16	59	15	102
290	0.0004679	0	61	16	122
291	0.0004646	33	86	13	139
292	0.0004737	13	71	11	129
293	0.0005105	25	70	10	115
294	0.0004589	13	68	12	123
295	0.0004676	26	75	9	124
296	0.0004786	6	77	18	148
297	0.0004831	28	82	17	136
298	0.0005329	24	73	14	122
299	0.0004579	25	81	18	137
300	0.000458	17	75	18	133
301	0.0004893	13	76	12	139
302	0.0002769	3	53	8	103
303	0.0003597	5	64	9	123
304	0.0004735	21	82	15	143
305	0.000466	10	82	12	154
306	0.0004828	9	67	15	125
307	0.000454	12	65	13	118
308	0.000474	19	81	16	143
309	0.000448	8	60	8	112
310	0.0004675	27	73	11	119
311	0.0004523	24	72	9	120
312	0.0004568	15	72	13	129
313	0.0004658	7	64	15	121
314	0.0004607	18	70	17	122
315	0.0004652	19	69	11	119
316	0.0004743	21	85	16	149
317	0.0003158	7	66	12	125
318	0.0004664	13	79	16	145
319	0.0002978	0	51	10	102
320	0.0004566	17	74	13	131
321	0.0004678	12	80	12	148
322	0.0004484	24	84	17	144
323	0.0004815	4	62	11	120
324	0.000469	18	72	16	126
325	0.0004616	16	80	14	144
326	0.0004843	13	77	10	141
327	0.0004989	15	78	13	141
328	0.0004514	15	67	12	119
329	0.0004452	2	60	16	118
330	0.0004783	6	74	16	142
331	0.0003669	6	62	13	118
332	0.0004559	22	76	15	130
333	0.0004691	27	74	11	121
334	0.0004546	14	70	12	126
335	0.0004524	9	80	13	151
336	0.00035	4	70	15	136
337	0.0004652	16	73	13	130
338	0.0003375	4	73	10	142
339	0.0004437	12	60	12	108
340	0.0005015	57	87	17	117
341	0.0004999	20	83	17	146
342	0.0004818	25	84	11	143
343	0.0003606	3	66	10	129
344	0.0004575	7	70	15	133
345	0.0004516	28	82	16	136
346	0.0004841	7	69	9	131
347	0.0004735	21	86	13	151
348	0.0003464	3	70	14	137
349	0.0004658	19	80	15	141
350	0.0004611	7	61	14	115
351	0.0004724	38	88	16	138
352	0.000458	14	69	12	124
353	0.0004744	15	75	10	135
354	0.0004598	27	80	19	133
355	0.0004413	9	55	16	101
356	0.0004839	42	102	16	162
357	0.0004782	35	83	12	131
358	0.0004989	10	76	14	142
359	0.0004556	12	63	11	114
360	0.0004682	16	66	18	116
361	0.0004804	14	61	12	108
362	0.0004573	16	70	18	124
363	0.0004454	21	74	14	127
364	0.0003479	4	69	16	134
365	0.0004681	13	65	12	117
366	0.0005161	19	65	9	111
367	0.0004486	8	66	17	124
368	0.0004735	19	70	11	121
369	0.0004613	9	69	10	129
370	0.0004517	33	89	14	145
371	0.0004816	31	81	15	131
372	0.0005117	22	76	19	130
373	0.0004741	22	78	12	134
374	0.0004625	19	86	17	153
375	0.0004928	59	90	17	121
376	0.0004643	15	77	17	139
377	0.0003544	15	65	9	115
378	0.0004705	16	77	19	138
379	0.000606	39	87	14	135
380	0.0004775	22	67	11	112
381	0.000469	18	77	15	136
382	0.000477	35	84	13	133
383	0.0004579	37	80	11	123
384	0.0004592	14	76	13	138
385	0.0004988	48	111	17	174
386	0.0004583	35	75	10	115
387	0.000494	32	79	12	126
388	0.0004879	30	74	17	118
389	0.000465	4	77	15	150
390	0.0012509	23	76	13	129
391	0.0004237	18	62	15	106
392	0.0005164	4	73	17	142
393	0.0004981	20	69	9	118
394	0.0004818	35	82	10	129
395	0.0005489	9	64	11	119
396	0.0004612	43	82	17	121
397	0.0002976	3	48	9	93
398	0.0005029	12	62	10	112
399	0.0004839	10	76	13	142
400	0.0003299	3	69	16	135
401	0.0003149	1	50	12	99
402	0.0004646	47	102	13	157
403	0.0004719	8	68	17	128
404	0.000469	25	80	12	135
405	0.0004672	16	81	17	146
406	0.0003205	4	56	11	108
407	0.0004789	4	68	16	132
408	0.0004495	9	59	16	109
409	0.0004895	29	84	16	139
410	0.0004899	1	71	18	141
411	0.0003393	2	63	10	124
412	0.0003869	12	71	12	130
413	0.0005003	69	102	15	135
414	0.0004839	12	76	11	140
415	0.0005039	33	81	16	129
416	0.0004496	27	62	13	97
417	0.0004623	55	95	14	135
418	0.000348	4	59	11	114
419	0.0004753	55	103	18	151
420	0.0003265	1	62	13	123
421	0.000459	17	60	14	103
422	0.000482	20	88	14	156
423	0.0004411	5	62	12	119
424	0.0004637	31	85	13	139
425	0.0004594	23	76	12	129
426	0.0004716	24	97	18	170
427	0.0004615	17	63	12	109
428	0.0004806	29	85	11	141
429	0.0004831	22	73	15	124
430	0.0004809	45	79	10	113
431	0.000449	7	69	13	131
432	0.0004429	13	76	18	139
433	0.0005224	53	118	17	183
434	0.0004517	21	69	15	117
435	0.0004505	9	65	13	121
436	0.0003701	4	70	13	136
437	0.000321	5	62	11	119
438	0.0004577	8	78	11	148
439	0.0004505	7	64	17	121
440	0.0004958	20	76	13	132
441	0.0003585	3	53	13	103
442	0.0004978	42	95	14	148
443	0.0004521	23	68	12	113
444	0.0004612	5	66	12	127
445	0.0004732	42	85	18	128
446	0.0003228	11	61	11	111
447	0.0005135	66	109	13	152
448	0.0004478	7	67	13	127
449	0.0004662	29	74	12	119
450	0.0004562	8	67	15	126
451	0.000375	7	55	11	103
452	0.0004886	4	57	11	110
453	0.0004508	6	54	14	102
454	0.0004668	9	83	12	157
455	0.0004649	18	72	10	126
456	0.0004551	8	66	13	124
457	0.0004914	32	97	16	162
458	0.0004781	23	71	11	119
459	0.0004707	17	65	9	113
460	0.0004754	51	104	19	157
461	0.0004682	31	76	13	121
462	0.0003601	2	52	8	102
463	0.0004747	1	65	13	129
464	0.000459	26	77	12	128
465	0.0005322	11	78	12	145
466	0.0003287	9	58	9	107
467	0.000472	13	63	10	113
468	0.0004622	9	64	11	119
469	0.0004974	7	76	15	145
470	0.0004522	12	68	11	124
471	0.0004839	42	94	16	146
472	0.0004614	2	57	10	112
473	0.0005096	2	72	14	142
474	0.0003524	4	73	13	142
475	0.0004512	1	59	16	117
476	0.0005262	6	68	16	130
477	0.0004593	10	69	15	128
478	0.0005125	21	65	10	109
479	0.0005505	9	79	10	149
480	0.0004883	8	60	10	112
481	0.0004732	4	70	19	136
482	0.0004746	18	79	15	140
483	0.0004833	43	88	17	133
484	0.0004641	26	69	13	112
485	0.0004905	12	66	9	120
486	0.0004638	10	69	14	128
487	0.0003491	7	62	12	117
488	0.0004785	18	83	17	148
489	0.0003522	1	71	14	141
490	0.0004557	29	86	14	143
491	0.0004959	7	72	13	137
492	0.0004696	48	84	18	120
493	0.0005119	17	75	10	133
494	0.0004671	40	89	16	138
495	0.0004479	14	71	16	128
496	0.0003128	5	54	9	103
497	0.0004556	6	52	13	98
498	0.0005115	13	69	13	125
499	0.0004678	2	60	17	118
500	0.000483	43	96	15	149
501	0.0004597	22	73	14	124
502	0.0004798	16	80	15	144
503	0.0004755	32	83	14	134
504	0.0004809	3	57	12	111
505	0.0004677	35	95	19	155
506	0.0004562	6	86	16	166
507	0.0004738	32	79	16	126
508	0.0004501	30	87	14	144
509	0.0004606	7	63	12	119
510	0.0004912	0	70	10	140
511	0.000456	22	70	14	118
512	0.0004741	2	80	16	158
513	0.0005057	14	73	17	132
514	0.0004569	35	76	16	117
515	0.0004622	28	82	15	136
516	0.0004525	12	51	7	90
517	0.0004838	35	93	13	151
518	0.0004796	39	96	19	153
519	0.0004674	24	75	16	126
520	0.0003087	9	70	11	131
521	0.0004655	7	68	11	129
522	0.0003511	1	61	9	121
523	0.0004846	17	71	10	125
524	0.0004772	1	67	10	133
525	0.0004537	6	74	15	142
526	0.000448	14	69	17	124
527	0.0004688	10	73	13	136
528	0.0005422	10	78	15	146
529	0.0004643	10	64	15	118
530	0.0004698	6	73	16	140
531	0.0004588	8	71	13	134
532	0.0004503	21	80	17	139
533	0.0004448	19	63	9	107
534	0.0004711	33	91	14	149
535	0.000457	14	77	12	140
536	0.0003381	1	76	16	151
537	0.0005925	22	86	13	150
538	0.0004602	3	63	19	123
539	0.0003587	3	71	15	139
540	0.0004774	8	68	12	128
541	0.0004448	12	65	12	118
542	0.0005463	21	79	17	137
543	0.0004566	21	70	16	119
544	0.000457	48	93	19	138
545	0.0005105	16	76	12	136
546	0.0004494	1	63	11	125
547	0.0003968	11	70	9	129
548	0.0004935	31	75	12	119
549	0.000476	13	75	10	137
550	0.0004599	7	74	10	141
551	0.0003747	3	61	10	119
552	0.0003412	3	76	18	149
553	0.000363	2	60	13	118
554	0.0004878	10	69	8	128
555	0.000507	11	83	15	155
556	0.000318	9	65	11	121
557	0.0003706	1	65	13	129
558	0.0004553	10	70	15	130
559	0.0004725	14	64	13	114
560	0.0005256	9	71	14	133
561	0.0004586	8	68	11	128
562	0.0004919	64	106	18	148
563	0.0004652	24	88	19	152
564	0.0005085	20	78	15	136
565	0.0003312	5	59	18	113
566	0.0004506	25	85	13	145
567	0.0004645	29	83	13	137
568	0.0004904	27	86	11	145
569	0.0005515	20	69	14	118
570	0.0004663	6	66	14	126
571	0.0004604	16	64	17	112
572	0.0004593	20	73	8	126
573	0.0004902	11	70	14	129
574	0.0004745	33	96	15	159
575	0.0003345	8	65	13	122
576	0.0004708	17	69	11	121
577	0.00047	39	101	18	163
578	0.0003348	6	61	18	116
579	0.000473	15	71	19	127
580	0.0004869	28	84	16	140
581	0.0004801	10	77	13	144
582	0.0005404	13	59	17	105
583	0.000511	2	69	13	136
584	0.0004516	12	70	13	128
585	0.000457	9	70	11	131
586	0.0003154	2	59	12	116
587	0.0004674	8	69	12	130
588	0.0004678	12	68	14	124
589	0.0004674	34	93	11	152
590	0.0004833	2	79	19	156
591	0.0003523	0	62	16	124
592	0.000467	9	77	19	145
593	0.0004873	31	88	15	145
594	0.0004405	14	69	11	124
595	0.0005175	20	76	14	132
596	0.0004884	17	76	13	135
597	0.0004908	18	55	13	92
598	0.0003426	1	61	16	121
599	0.0005166	7	65	10	123
600	0.0004989	53	91	14	129
601	0.0004583	46	89	15	132
602	0.0004667	8	70	19	132
603	0.0003472	2	70	12	138
604	0.0005974	24	78	19	132
605	0.0004608	25	93	17	161
606	0.000478	40	90	11	140
607	0.0003389	1	57	10	113
608	0.0004666	21	83	13	145
609	0.0004665	29	93	15	157
610	0.0003515	4	75	13	146
611	0.0003217	5	66	9	127
612	0.0004551	12	76	12	140
613	0.0004625	31	86	13	141
614	0.0004492	24	74	15	124
615	0.0003122	4	51	11	98
616	0.0004613	65	94	11	123
617	0.0005537	15	88	10	161
618	0.0004734	12	78	17	144
619	0.0004669	13	72	14	131
620	0.0004544	30	81	13	132
621	0.0004593	11	68	10	125
622	0.0004633	12	70	16	128
623	0.000473	15	74	13	133
624	0.0004638	12	68	10	124
625	0.0003217	0	54	12	108
626	0.0004799	26	81	12	136
627	0.0003725	3	66	18	129
628	0.0004623	3	72	15	141
629	0.0003606	4	59	12	114
630	0.0003577	16	77	15	138
631	0.0003435	1	57	12	113
632	0.0004601	12	73	13	134
633	0.0004711	63	105	15	147
634	0.0004833	11	68	11	125
635	0.0004544	3	75	14	147
636	0.0004949	23	80	15	137
637	0.0004588	12	72	13	132
638	0.0004684	29	72	13	115
639	0.0005838	0	73	17	146
640	0.0004403	4	54	17	104
641	0.000472	25	72	15	119
642	0.0004974	36	97	15	158
643	0.000491	19	68	14	117
644	0.0004472	8	62	12	116
645	0.0004651	16	62	9	108
646	0.0004812	17	62	9	107
647	0.0003183	1	51	10	101
648	0.0004482	1	69	17	137
649	0.0003654	3	74	16	145
650	0.0003761	2	55	11	108
651	0.0004616	24	70	12	116
652	0.0003894	4	71	11	138
653	0.0003613	1	68	12	135
654	0.0004694	24	91	16	158
655	0.0004726	36	92	18	148
656	0.0003614	8	78	13	148
657	0.0004623	60	91	16	122
658	0.0004801	20	81	11	142
659	0.0004669	10	69	12	128
660	0.0004462	3	58	13	113
661	0.0004794	15	70	16	125
662	0.0003542	11	64	10	117
663	0.0004461	15	73	12	131
664	0.0004432	55	92	16	129
665	0.0004702	16	71	15	126
666	0.0005056	9	59	11	109
667	0.0004694	17	84	17	151
668	0.000477	45	83	17	121
669	0.0004888	37	84	13	131
670	0.0004711	15	86	12	157
671	0.0004578	2	61	9	120
672	0.0002931	3	64	12	125
673	0.0004589	33	79	12	125
674	0.0004683	26	87	12	148
675	0.000489	38	79	19	120
676	0.0005388	23	91	11	159
677	0.0004435	12	65	14	118
678	0.0004624	26	82	13	138
679	0.0004684	2	60	12	118
680	0.0004548	28	82	11	136
681	0.0005361	26	70	8	114
682	0.0004746	12	77	15	142
683	0.0005002	21	90	14	159
684	0.0003252	21	69	14	117
685	0.0004553	8	67	15	126
686	0.000459	25	74	12	123
687	0.0004513	17	75	12	133
688	0.0004491	10	67	11	124
689	0.000472	42	92	15	142
690	0.0004754	24	80	14	136
691	0.0004602	11	66	13	121
692	0.0003158	1	56	11	111
693	0.000461	3	59	16	115
694	0.0004546	9	67	13	125
695	0.0003346	4	81	13	158
696	0.0003025	9	56	9	103
697	0.000467	17	67	10	117
698	0.0003447	5	64	15	123
699	0.0003359	1	51	10	101
700	0.0005182	24	74	18	124
701	0.0003069	5	62	10	119
702	0.0004597	40	78	10	116
703	0.000438	2	63	18	124
704	0.0004727	28	82	16	136
705	0.0005171	15	81	15	147
706	0.0003579	7	66	16	125
707	0.0004996	24	76	16	128
708	0.0004768	41	96	13	151
709	0.0004497	14	64	9	114
710	0.0004845	28	82	13	136
711	0.0004645	29	93	16	157
712	0.0004926	16	66	10	116
713	0.0004874	24	72	18	120
714	0.0003526	5	67	14	129
715	0.0004722	32	86	13	140
716	0.0004644	19	68	17	117
717	0.0005482	46	89	13	132
718	0.0003139	13	60	10	107
719	0.0004368	0	55	12	110
720	0.0004768	14	80	11	146
721	0.0004589	14	88	13	162
722	0.0004871	24	67	12	110
723	0.0004644	19	82	18	145
724	0.0005383	9	70	13	131
725	0.0005113	8	69	16	130
726	0.0003663	12	69	13	126
727	0.0004719	28	91	15	154
728	0.0004688	18	76	10	134
729	0.0004793	75	110	19	145
730	0.0004631	13	81	12	149
731	0.0004938	16	72	10	128
732	0.0005231	13	70	15	127
733	0.0004755	15	61	10	107
734	0.0004506	19	70	16	121
735	0.0004564	4	59	8	114
736	0.0004781	19	81	13	143
737	0.000497	3	69	13	135
738	0.0004632	42	91	11	140
739	0.0005721	44	95	18	146
740	0.0004651	19	65	16	111
741	0.0004675	39	85	16	131
742	0.0004511	9	66	12	123
743	0.0005053	15	74	12	133
744	0.0004507	14	67	12	120
745	0.00052	28	89	19	150
746	0.0004539	11	70	11	129
747	0.0003606	5	68	14	131
748	0.0004722	15	79	14	143
749	0.0004746	37	86	14	135
750	0.000454	25	83	12	141
751	0.0003409	7	65	11	123
752	0.0005389	15	70	15	125
753	0.0004954	73	100	16	127
754	0.0004748	18	64	11	110
755	0.0003243	22	70	11	118
756	0.0004556	16	68	10	120
757	0.0005136	3	59	9	115
758	0.0004566	20	67	13	114
759	0.0003726	0	66	12	132
760	0.000451	4	67	11	130
761	0.0004638	26	85	15	144
762	0.0004962	40	96	13	152
763	0.0004536	11	74	14	137
764	0.0004571	10	70	15	130
765	0.0004548	7	67	15	127
766	0.0004565	39	86	14	133
767	0.0004396	9	61	11	113
768	0.0004763	7	80	13	153
769	0.0004664	9	74	13	139
770	0.0004959	20	66	9	112
771	0.0004619	34	88	15	142
772	0.000304	7	66	14	125
773	0.000377	1	68	10	135
774	0.0004666	9	73	14	137
775	0.0004632	16	67	10	118
776	0.0004603	30	86	19	142
777	0.0004821	27	78	16	129
778	0.0004909	29	77	11	125
779	0.000453	12	77	14	142
780	0.0004873	28	94	14	160
781	0.0005351	6	66	11	126
782	0.0004722	29	80	12	131
783	0.0004778	4	76	16	148
784	0.0003231	12	72	10	132
785	0.0005172	21	85	12	149
786	0.0005336	8	78	15	148
787	0.0004653	12	55	14	98
788	0.0003365	4	73	12	142
789	0.0004759	27	74	13	121
790	0.0004755	7	60	11	113
791	0.0004838	11	66	13	121
792	0.0004835	3	80	12	157
793	0.0004769	29	79	16	129
794	0.0004594	35	91	11	147
795	0.0004583	7	79	17	151
796	0.0004596	5	74	15	143
797	0.0004635	3	63	18	123
798	0.0004945	21	72	9	123
799	0.0004948	7	71	16	135
800	0.0003487	8	73	13	138
801	0.0002994	5	51	12	97
802	0.0003277	2	65	14	128
803	0.0004477	8	54	15	100
804	0.000462	3	68	15	133
805	0.0004671	13	86	17	159
806	0.0004946	14	79	18	144
807	0.0004627	48	94	16	140
808	0.0005112	9	62	13	115
809	0.0004691	4	58	11	112
810	0.0003584	7	63	18	119
811	0.0005727	16	70	15	124
812	0.0004594	9	72	10	135
813	0.0004501	19	70	9	121
814	0.0004618	34	82	15	130
815	0.0005118	29	86	14	143
816	0.0004758	17	69	15	121
817	0.0004567	13	77	15	141
818	0.000447	17	77	16	137
819	0.0004879	14	60	15	106
820	0.0004406	8	59	17	110
821	0.0003337	4	66	19	128
822	0.0004584	13	85	13	157
823	0.0005695	14	65	10	116
824	0.0005353	38	86	12	134
825	0.0003308	4	59	11	114
826	0.0004581	15	79	12	143
827	0.000461	16	75	19	134
828	0.0003642	8	68	11	128
829	0.0005734	45	92	14	139
830	0.000535	9	64	14	119
831	0.0005011	6	75	12	144
832	0.0005219	4	73	18	142
833	0.0004582	12	81	16	150
834	0.0005514	8	63	12	118
835	0.0003513	3	69	8	135
836	0.0004483	1	57	13	113
837	0.0003596	2	73	14	144
838	0.0004712	34	79	12	124
839	0.0004735	4	71	10	138
840	0.0004716	5	77	12	149
841	0.0004554	26	70	11	114
842	0.0004667	11	79	13	147
843	0.0004069	6	65	11	124
844	0.0004566	21	76	15	131
845	0.0004708	16	77	17	138
846	0.0004755	31	78	11	125
847	0.0004881	44	109	18	174
848	0.0003429	3	65	12	127
849	0.0004438	5	64	12	123
850	0.0004616	8	77	14	146
851	0.0004923	15	71	13	127
852	0.0004589	7	58	9	109
853	0.000522	25	73	17	121
854	0.0004626	6	80	13	154
855	0.0004712	13	73	14	133
856	0.0004647	10	70	17	130
857	0.0004552	2	70	10	138
858	0.0003583	6	61	9	116
859	0.0004819	54	93	14	132
860	0.0004602	4	76	13	148
861	0.0003306	4	74	11	144
862	0.0003223	5	58	10	111
863	0.0004836	12	82	19	152
864	0.0004574	25	78	16	131
865	0.0004873	37	94	16	151
866	0.0004741	16	74	17	132
867	0.0004422	7	61	18	115
868	0.0004565	23	81	14	139
869	0.000454	9	73	15	137
870	0.0004626	19	67	11	115
871	0.0004835	58	89	17	120
872	0.00046	10	71	17	132
873	0.000461	11	77	10	143
874	0.0005029	2	70	15	138
875	0.0003748	1	54	12	107
876	0.0003803	1	62	14	123
877	0.0004535	21	74	10	127
878	0.0003335	2	66	10	130
879	0.0004583	6	81	19	156
880	0.0004361	6	65	12	124
881	0.0004667	13	74	11	135
882	0.0003547	23	76	16	129
883	0.0004792	6	68	17	130
884	0.0003782	3	69	12	135
885	0.000513	12	79	17	146
886	0.0004663	47	78	13	109
887	0.0005238	51	87	11	123
888	0.0004518	4	57	12	110
889	0.0004722	14	75	9	136
890	0.0004673	11	74	13	137
891	0.000341	0	58	14	116
892	0.0003715	13	61	19	109
893	0.0003313	12	63	11	114
894	0.0004544	17	75	16	133
895	0.0004921	12	71	12	130
896	0.0004418	4	72	18	140
897	0.0004636	18	61	10	104
898	0.0005175	31	92	18	153
899	0.0004609	4	78	12	152
900	0.0004896	23	67	12	111
901	0.0003339	6	65	10	124
902	0.0004599	13	77	17	141
903	0.0003529	5	74	13	143
904	0.0004604	20	68	13	116
905	0.0004879	2	66	17	130
906	0.0004864	28	86	12	144
907	0.0004484	14	61	11	108
908	0.0004784	45	89	15	133
909	0.0005846	22	75	15	128
910	0.0004465	16	72	14	128
911	0.0004424	19	65	12	111
912	0.0004847	21	69	14	117
913	0.0004554	14	71	16	128
914	0.0004544	3	56	13	109
915	0.0004674	25	81	13	137
916	0.0003787	8	78	12	148
917	0.000474	9	75	15	141
918	0.000334	2	62	13	122
919	0.0004691	10	78	16	146
920	0.0004591	11	78	17	145
921	0.0004691	3	71	10	139
922	0.0004608	17	70	10	123
923	0.0003616	7	61	9	115
924	0.0003112	5	49	7	93
925	0.0003313	2	69	12	136
926	0.0003298	1	68	11	135
927	0.0005726	8	83	12	158
928	0.000355	3	68	12	133
929	0.0003342	2	65	13	128
930	0.0003765	14	67	10	120
931	0.0003238	5	70	10	135
932	0.0004642	9	78	17	147
933	0.0004667	14	72	12	130
934	0.0004178	5	62	9	119
935	0.0004503	9	72	18	135
936	0.0004624	11	78	15	145
937	0.0004512	10	68	15	126
938	0.0004601	25	66	14	107
939	0.0004698	21	75	15	129
940	0.0004616	12	78	17	144
941	0.0004779	15	73	13	131
942	0.0004632	19	83	18	147
943	0.0004798	7	79	18	151
944	0.0005058	35	89	16	143
945	0.000351	4	70	13	136
946	0.0005239	6	84	13	162
947	0.0004676	7	69	13	131
948	0.0004788	42	101	14	160
949	0.0004714	6	62	12	118
950	0.0004637	12	62	12	112
951	0.0004596	18	69	11	120
952	0.0004669	30	95	17	160
953	0.0004871	42	103	16	164
954	0.0004631	15	59	9	103
955	0.0006071	11	74	11	137
956	0.0004764	30	78	14	126
957	0.0004535	13	77	13	141
958	0.0004894	8	64	14	120
959	0.0004523	16	67	13	118
960	0.0004656	3	69	13	135
961	0.0004655	9	65	12	121
962	0.0003854	13	71	13	129
963	0.0004944	54	96	13	138
964	0.0003335	5	70	11	135
965	0.0004713	14	82	16	150
966	0.000471	17	85	12	153
967	0.0004705	9	66	10	123
968	0.0002902	9	64	9	119
969	0.0004595	6	65	18	124
970	0.0004879	61	101	17	141
971	0.0004548	17	72	15	127
972	0.0004467	20	76	11	132
973	0.0004356	6	69	15	132
974	0.0004727	19	70	11	121
975	0.000512	28	80	11	132
976	0.0004558	1	65	18	129
977	0.0004605	16	71	15	126
978	0.0004615	21	72	19	123
979	0.0003455	5	57	13	109
980	0.0005256	1	71	13	141
981	0.0004677	16	90	14	164
982	0.000449	16	71	14	126
983	0.0005282	15	69	10	123
984	0.0004555	14	76	17	138
985	0.0004647	7	77	17	147
986	0.0005454	8	73	19	138
987	0.0004522	17	68	10	119
988	0.0005054	7	73	19	139
989	0.0003019	8	55	8	102
990	0.000472	23	82	12	141
991	0.0004678	41	74	12	107
992	0.0004894	16	64	11	112
993	0.0004686	14	75	16	136
994	0.0003872	3	70	13	137
995	0.0004822	12	87	19	162
996	0.0004796	22	80	13	138
997	0.0004792	17	74	17	131
998	0.0004528	18	80	12	142
999	0.0004547	8	74	19	140
mean	0.00045503	16.613	73.284	13.469	129.955
