# Supplementary material
Source: ML conference proceedings conference paper supplement (https://openreview.net/forum?id=2rAiDBJgR_)
Supplement: supplementary_material [file UU_size-30_test.xlsx]

## Sheet: GS_MaleOpt
	time	SEq	Bal	Reg	Egal
0	0.0001815	101	186	26	271
1	0.000187	251	302	29	353
2	0.0002236	124	179	24	234
3	0.0002103	102	171	22	240
4	0.0001909	304	331	29	358
5	0.000231	38	127	16	216
6	0.0001791	190	254	22	318
7	0.0001756	210	261	27	312
8	0.0002207	92	166	20	240
9	0.0001748	202	253	23	304
10	0.0001864	112	193	27	274
11	0.0002135	92	192	24	292
12	0.0001761	227	279	28	331
13	0.0002077	215	271	25	327
14	0.0001824	195	237	24	279
15	0.0002524	51	165	19	279
16	0.0001809	166	223	20	280
17	0.0002035	167	235	24	303
18	0.0002032	140	217	29	294
19	0.0001934	37	151	19	265
20	0.0002137	73	169	22	265
21	0.0001863	106	182	23	258
22	0.0001897	84	166	22	248
23	0.0002171	151	233	26	315
24	0.0001908	78	178	25	278
25	0.000209	106	198	25	290
26	0.0001937	112	192	24	272
27	0.000199	171	218	25	265
28	0.0002103	14	125	25	236
29	0.0001974	286	329	29	372
30	0.000218	164	239	26	314
31	0.0002015	235	290	24	345
32	0.0002122	57	174	21	291
33	0.0002132	23	135	15	247
34	0.0001894	107	199	24	291
35	0.0001807	245	274	27	303
36	0.0002033	93	170	22	247
37	0.0002559	102	179	25	256
38	0.0002139	20	124	17	228
39	0.0001988	104	186	25	268
40	0.0002368	143	218	22	293
41	0.0001924	161	244	24	327
42	0.0002007	60	146	29	232
43	0.0002279	129	205	24	281
44	0.0002114	20	132	29	244
45	0.0002164	7	128	16	249
46	0.0002165	51	165	20	279
47	0.0002123	140	218	29	296
48	0.0002058	48	160	26	272
49	0.0001852	176	242	28	308
50	0.0001952	114	185	22	256
51	0.0002016	165	230	19	295
52	0.0002158	139	222	22	305
53	0.0002125	85	195	25	305
54	0.0001971	140	184	21	228
55	0.0001735	209	252	27	295
56	0.0001909	116	191	26	266
57	0.0002105	87	178	28	269
58	0.0002142	134	220	21	306
59	0.0001823	304	338	26	372
60	0.000201	29	130	18	231
61	0.0002024	158	238	26	318
62	0.00024	175	237	26	299
63	0.0001873	198	260	27	322
64	0.0001804	124	203	28	282
65	0.0002054	42	156	19	270
66	0.0001878	80	156	18	232
67	0.0001926	158	238	27	318
68	0.0001949	257	294	26	331
69	0.0002175	209	257	22	305
70	0.000257	18	135	19	252
71	0.0001981	148	207	28	266
72	0.0002572	215	257	27	299
73	0.0001986	202	267	28	332
74	0.0002212	154	230	26	306
75	0.0002105	125	210	27	295
76	0.0002199	62	168	18	274
77	0.000181	120	196	23	272
78	0.0001929	148	237	24	326
79	0.0002225	37	142	28	247
80	0.0002075	140	220	24	300
81	0.0002645	72	168	23	264
82	0.0002148	340	369	29	398
83	0.0002152	127	216	29	305
84	0.0001756	166	221	29	276
85	0.0001988	33	147	23	261
86	0.0001969	46	133	12	220
87	0.0002653	2	115	24	228
88	0.0002059	162	243	25	324
89	0.0002093	107	182	23	257
90	0.0001913	163	236	19	309
91	0.0001909	115	200	23	285
92	0.0002103	129	196	26	263
93	0.0002031	131	230	28	329
94	0.000202	213	263	18	313
95	0.0001956	87	167	23	247
96	0.0001806	145	220	26	295
97	0.0002087	12	159	27	306
98	0.0001943	190	257	28	324
99	0.0001972	177	234	25	291
100	0.0001821	145	207	28	269
101	0.0001949	196	251	28	306
102	0.0001871	130	196	28	262
103	0.0002034	47	152	22	257
104	0.0002095	189	245	25	301
105	0.0002368	17	159	28	301
106	0.0002035	74	169	23	264
107	0.0002468	24	156	25	288
108	0.0002106	21	137	22	253
109	0.0002314	71	164	27	257
110	0.0002034	129	203	23	277
111	0.000194	105	190	26	275
112	0.0002494	133	202	23	271
113	0.000201	127	211	18	295
114	0.0002031	220	274	29	328
115	0.000199	163	220	26	277
116	0.0001968	261	305	29	349
117	0.0001993	169	244	28	319
118	0.0002062	103	198	22	293
119	0.0001853	205	244	22	283
120	0.0002165	28	148	18	268
121	0.0001858	197	253	29	309
122	0.0002215	59	144	27	229
123	0.0001914	127	194	25	261
124	0.0001849	312	347	27	382
125	0.0001926	105	184	19	263
126	0.0002013	132	210	22	288
127	0.0002008	49	162	17	275
128	0.0002183	133	211	29	289
129	0.0001983	106	197	21	288
130	0.0002069	36	135	17	234
131	0.000242	58	149	18	240
132	0.0001943	55	142	19	229
133	0.0002067	184	227	27	270
134	0.0001959	123	199	24	275
135	0.0002147	211	260	25	309
136	0.0001839	240	285	29	330
137	0.0001872	149	224	26	299
138	0.0001896	114	190	29	266
139	0.000181	144	217	23	290
140	0.0002212	126	206	28	286
141	0.0002039	168	246	26	324
142	0.0002159	182	244	29	306
143	0.0002028	34	176	25	318
144	0.0002033	65	156	26	247
145	0.0001927	125	196	19	267
146	0.0002022	164	228	28	292
147	0.0001949	156	216	29	276
148	0.0001905	229	276	27	323
149	0.0002286	199	259	25	319
150	0.0001835	123	210	23	297
151	0.0002288	167	222	25	277
152	0.0002012	64	166	22	268
153	0.0002053	52	148	18	244
154	0.0001752	170	238	28	306
155	0.0001916	52	144	23	236
156	0.0001982	196	248	28	300
157	0.0002077	131	204	24	277
158	0.0001941	168	212	22	256
159	0.0001922	133	212	21	291
160	0.0002105	29	128	15	227
161	0.0001993	135	217	21	299
162	0.0001992	70	171	26	272
163	0.0001973	86	177	20	268
164	0.000217	116	187	25	258
165	0.00018	185	252	27	319
166	0.0002202	176	233	26	290
167	0.0002116	34	141	21	248
168	0.0001878	144	216	19	288
169	0.0001871	224	262	27	300
170	0.0001984	119	180	21	241
171	0.0001926	35	146	17	257
172	0.0002165	103	170	23	237
173	0.0002046	117	196	20	275
174	0.000176	223	282	27	341
175	0.0001901	204	253	19	302
176	0.0002154	194	238	28	282
177	0.0002551	129	211	27	293
178	0.0002119	117	199	17	281
179	0.0002299	39	152	23	265
180	0.0001891	247	289	28	331
181	0.000226	153	223	21	293
182	0.0002237	24	142	29	260
183	0.0001987	226	265	29	304
184	0.0002035	90	186	17	282
185	0.0002135	186	246	25	306
186	0.0002342	159	245	27	331
187	0.000198	139	197	23	255
188	0.0001999	236	290	27	344
189	0.0002235	126	217	27	308
190	0.0001848	120	205	25	290
191	0.0002073	29	128	16	227
192	0.0002478	19	149	26	279
193	0.0001972	53	174	29	295
194	0.0002152	83	189	16	295
195	0.0001915	51	150	24	249
196	0.0001969	247	285	27	323
197	0.0002078	101	191	28	281
198	0.000259	74	157	27	240
199	0.0002692	136	214	23	292
200	0.0001968	80	178	22	276
201	0.0002162	60	175	25	290
202	0.0001851	260	308	28	356
203	0.000238	87	182	28	277
204	0.000194	123	194	25	265
205	0.0002075	73	168	19	263
206	0.0001972	73	161	22	249
207	0.0002103	143	214	25	285
208	0.0002049	31	149	20	267
209	0.0001979	53	153	27	253
210	0.0002293	230	286	29	342
211	0.000174	230	297	29	364
212	0.000204	89	185	24	281
213	0.0002387	171	224	24	277
214	0.0002037	163	237	20	311
215	0.0001976	70	173	19	276
216	0.0002404	30	148	27	266
217	0.0002422	91	175	24	259
218	0.0001893	180	239	24	298
219	0.0001912	55	153	22	251
220	0.0002048	223	263	25	303
221	0.0001842	178	238	23	298
222	0.0001969	197	252	21	307
223	0.0001831	151	225	25	299
224	0.0002052	81	173	26	265
225	0.0001947	131	212	28	293
226	0.0002151	195	241	28	287
227	0.0001888	244	290	25	336
228	0.0001998	190	253	27	316
229	0.0002	79	174	21	269
230	0.0002392	30	150	21	270
231	0.0001904	261	310	29	359
232	0.0002248	16	151	22	286
233	0.0002444	93	192	29	291
234	0.0002184	116	178	27	240
235	0.0001656	256	303	25	350
236	0.0002054	126	205	23	284
237	0.0002313	136	224	24	312
238	0.0002088	142	236	29	330
239	0.0002371	238	280	26	322
240	0.0002178	8	133	21	258
241	0.0002026	83	181	28	279
242	0.0002119	290	328	27	366
243	0.0001711	242	281	29	320
244	0.0002211	233	280	25	327
245	0.000208	209	268	29	327
246	0.0001966	97	204	22	311
247	0.0002189	170	247	25	324
248	0.0002332	112	194	24	276
249	0.0001868	250	301	26	352
250	0.0001737	204	242	27	280
251	0.0002148	9	128	17	247
252	0.0002039	241	284	28	327
253	0.0001927	160	217	23	274
254	0.0001755	255	304	22	353
255	0.0002506	108	194	28	280
256	0.0001811	244	286	29	328
257	0.0002	77	166	24	255
258	0.0002125	20	122	21	224
259	0.000191	97	186	27	275
260	0.0001952	180	261	28	342
261	0.0002338	140	216	24	292
262	0.0002141	21	122	15	223
263	0.0001927	162	220	25	278
264	0.0002114	126	202	25	278
265	0.0001798	214	269	29	324
266	0.0001819	158	220	29	282
267	0.0001841	292	323	28	354
268	0.0001953	65	151	14	237
269	0.0002238	91	173	17	255
270	0.0002273	143	234	25	325
271	0.0001936	121	214	24	307
272	0.0002103	124	193	23	262
273	0.0001847	181	234	24	287
274	0.0001991	124	194	19	264
275	0.0002362	147	207	18	267
276	0.0001819	205	271	28	337
277	0.0002225	134	209	24	284
278	0.0002241	119	183	27	247
279	0.0002175	50	163	28	276
280	0.0002027	85	168	19	251
281	0.0002429	123	214	22	305
282	0.0002106	145	217	19	289
283	0.0001777	223	275	27	327
284	0.0002028	219	268	25	317
285	0.0001852	340	389	29	438
286	0.0002352	9	122	14	235
287	0.0001919	163	250	29	337
288	0.0001971	87	181	24	275
289	0.000237	264	322	27	380
290	0.0002355	145	237	23	329
291	0.0001885	169	226	25	283
292	0.0001893	223	269	22	315
293	0.0002079	90	188	28	286
294	0.0002244	95	189	24	283
295	0.0002002	147	211	21	275
296	0.0002156	241	297	29	353
297	0.0002067	262	322	29	382
298	0.0001904	238	280	29	322
299	0.0002003	124	209	21	294
300	0.0002287	88	183	23	278
301	0.0001921	169	225	21	281
302	0.0002151	143	233	22	323
303	0.000182	289	331	29	373
304	0.0002017	170	226	26	282
305	0.0002015	56	137	24	218
306	0.0001789	154	206	20	258
307	0.0001841	201	268	25	335
308	0.0002009	206	252	28	298
309	0.0002106	0	130	22	260
310	0.0002005	26	145	18	264
311	0.0002345	180	242	21	304
312	0.0001996	113	194	20	275
313	0.0001971	65	181	26	297
314	0.0001869	118	194	27	270
315	0.000177	199	257	27	315
316	0.000225	16	126	16	236
317	0.000184	76	155	27	234
318	0.0001955	110	183	21	256
319	0.0002003	30	144	18	258
320	0.0002235	17	127	18	237
321	0.0001989	87	170	22	253
322	0.0001834	175	233	25	291
323	0.00022	89	176	22	263
324	0.0001909	92	175	22	258
325	0.0002082	133	206	19	279
326	0.0002254	40	160	23	280
327	0.0002009	265	296	29	327
328	0.0002016	96	212	22	328
329	0.000204	104	185	20	266
330	0.0002256	70	158	18	246
331	0.0001934	154	232	23	310
332	0.0001997	194	254	26	314
333	0.0002107	133	191	27	249
334	0.0001909	220	277	25	334
335	0.0001978	210	259	29	308
336	0.0002019	324	366	29	408
337	0.0002208	94	163	21	232
338	0.0002171	14	145	27	276
339	0.0001863	155	215	21	275
340	0.000183	113	175	15	237
341	0.0002007	204	257	26	310
342	0.0001829	136	198	28	260
343	0.0002343	204	246	26	288
344	0.000355	64	159	25	254
345	0.0001974	116	195	26	274
346	0.0002187	85	194	27	303
347	0.0001989	223	282	24	341
348	0.0002235	39	157	19	275
349	0.000224	161	226	24	291
350	0.0001963	100	186	28	272
351	0.0001884	159	228	29	297
352	0.0002556	216	279	25	342
353	0.0002058	67	174	24	281
354	0.0001955	93	190	24	287
355	0.0002203	163	237	25	311
356	0.0002315	29	132	22	235
357	0.0001871	298	338	25	378
358	0.0001872	165	224	27	283
359	0.0002495	262	310	28	358
360	0.0002164	28	142	16	256
361	0.0002195	49	144	16	239
362	0.0002437	114	181	26	248
363	0.0001959	178	233	23	288
364	0.0001997	145	215	19	285
365	0.0002022	232	274	29	316
366	0.0002029	101	182	25	263
367	0.0001958	107	200	24	293
368	0.000201	83	192	22	301
369	0.000193	134	208	24	282
370	0.000198	175	237	21	299
371	0.0001881	210	251	28	292
372	0.000206	215	268	26	321
373	0.0001833	158	226	26	294
374	0.0002548	10	119	16	228
375	0.0002296	126	201	27	276
376	0.0001971	141	208	25	275
377	0.0002119	112	190	27	268
378	0.0002278	60	164	14	268
379	0.0002173	63	145	20	227
380	0.0001955	149	225	27	301
381	0.0002592	64	186	27	308
382	0.0002167	229	286	25	343
383	0.0001957	90	179	23	268
384	0.0001952	205	263	26	321
385	0.0002075	118	205	23	292
386	0.0001918	54	143	26	232
387	0.0001975	170	249	25	328
388	0.0002003	242	272	29	302
389	0.0002203	80	178	25	276
390	0.0002066	301	351	29	401
391	0.0001867	141	191	20	241
392	0.0002348	110	187	26	264
393	0.0001919	89	164	22	239
394	0.0002115	61	144	22	227
395	0.0002279	77	178	17	279
396	0.0002129	127	205	28	283
397	0.000204	86	167	17	248
398	0.0001906	106	190	20	274
399	0.0002143	142	213	24	284
400	0.0002475	28	142	16	256
401	0.0002147	17	148	23	279
402	0.0001947	194	261	23	328
403	0.0001939	258	304	29	350
404	0.0002255	219	273	29	327
405	0.0001838	261	322	24	383
406	0.000195	218	261	22	304
407	0.0001859	166	224	25	282
408	0.000206	37	151	21	265
409	0.0002024	98	173	22	248
410	0.0002202	189	246	27	303
411	0.0002004	86	161	25	236
412	0.0002128	64	164	17	264
413	0.0002344	95	183	21	271
414	0.0001955	207	257	28	307
415	0.0002018	97	179	18	261
416	0.0002239	59	164	22	269
417	0.0001969	54	167	22	280
418	0.0002292	127	212	27	297
419	0.000208	40	139	25	238
420	0.0002135	100	186	19	272
421	0.0001934	179	247	24	315
422	0.0001787	189	238	25	287
423	0.0002171	142	215	20	288
424	0.0002335	343	380	25	417
425	0.000198	120	193	18	266
426	0.0002224	20	156	27	292
427	0.0002081	93	172	24	251
428	0.0002167	125	187	17	249
429	0.0001901	122	208	26	294
430	0.0002742	183	244	25	305
431	0.0001806	129	199	21	269
432	0.0002214	25	144	27	263
433	0.0002204	91	169	21	247
434	0.0001964	45	154	17	263
435	0.0002114	237	292	29	347
436	0.0002651	112	197	18	282
437	0.0001804	203	254	20	305
438	0.0002288	245	307	26	369
439	0.0001925	307	362	28	417
440	0.0002308	46	165	24	284
441	0.0001788	194	265	28	336
442	0.0001968	173	239	26	305
443	0.0002056	142	225	24	308
444	0.0002376	127	199	23	271
445	0.000235	77	197	26	317
446	0.000219	92	180	21	268
447	0.0002042	49	159	25	269
448	0.0001993	74	160	23	246
449	0.000209	171	245	28	319
450	0.0002055	59	156	25	253
451	0.000207	216	263	29	310
452	0.0002239	105	198	20	291
453	0.0002277	241	279	25	317
454	0.0001891	177	233	21	289
455	0.0001886	122	196	18	270
456	0.000211	130	212	27	294
457	0.0002168	1	133	20	265
458	0.0002278	44	173	26	302
459	0.0002149	275	324	29	373
460	0.0001894	152	224	26	296
461	0.0002377	27	141	26	255
462	0.000184	116	194	23	272
463	0.0001829	272	309	29	346
464	0.0002118	63	156	19	249
465	0.0002207	66	164	29	262
466	0.0002434	4	137	23	270
467	0.0001896	180	225	27	270
468	0.000191	103	181	20	259
469	0.0002282	205	262	20	319
470	0.0002349	89	177	22	265
471	0.0002147	357	384	26	411
472	0.0001993	198	267	25	336
473	0.0002337	19	134	19	249
474	0.0001962	158	224	23	290
475	0.0002341	236	295	26	354
476	0.0002685	75	169	20	263
477	0.0002287	87	187	19	287
478	0.0001734	185	251	29	317
479	0.0002139	5	123	26	241
480	0.0002595	107	183	16	259
481	0.0002099	185	245	27	305
482	0.0001878	209	275	25	341
483	0.0001906	197	263	21	329
484	0.0002218	76	177	25	278
485	0.0001745	216	269	26	322
486	0.0002036	140	211	28	282
487	0.0001895	123	203	29	283
488	0.0001923	83	157	28	231
489	0.0001929	321	362	27	403
490	0.000269	28	159	21	290
491	0.0002289	117	202	23	287
492	0.0002083	220	263	25	306
493	0.0002049	160	229	28	298
494	0.000214	187	248	20	309
495	0.0002206	48	155	26	262
496	0.0002025	243	291	24	339
497	0.000213	81	168	23	255
498	0.000195	184	234	25	284
499	0.0001895	294	324	28	354
500	0.0002014	29	119	20	209
501	0.0002008	166	222	25	278
502	0.00018	167	226	24	285
503	0.0002413	103	194	29	285
504	0.0002293	109	192	26	275
505	0.000174	236	271	24	306
506	0.0002081	185	251	29	317
507	0.0002024	180	251	29	322
508	0.0002017	234	284	21	334
509	0.0001976	82	180	27	278
510	0.0001997	83	179	19	275
511	0.0002298	91	192	21	293
512	0.0001907	195	267	26	339
513	0.0002055	137	221	25	305
514	0.0002236	127	189	22	251
515	0.0002082	141	219	22	297
516	0.0002346	131	198	28	265
517	0.0001999	199	257	27	315
518	0.0002105	263	294	26	325
519	0.0001988	218	290	28	362
520	0.0001829	161	214	27	267
521	0.0001933	175	236	22	297
522	0.0002188	24	127	17	230
523	0.0002225	55	145	27	235
524	0.0002374	33	132	22	231
525	0.0002404	107	180	23	253
526	0.0001921	217	261	28	305
527	0.0002188	155	219	21	283
528	0.0002285	73	164	18	255
529	0.0002047	166	239	20	312
530	0.0002222	137	227	28	317
531	0.0002025	41	151	16	261
532	0.0001899	83	173	27	263
533	0.0001979	58	155	24	252
534	0.0002191	106	212	24	318
535	0.0002116	170	225	27	280
536	0.0002018	123	182	21	241
537	0.0002123	63	171	25	279
538	0.0001962	254	293	29	332
539	0.0002243	76	160	21	244
540	0.0002412	175	230	21	285
541	0.0002408	145	217	23	289
542	0.0001857	228	274	29	320
543	0.0001822	193	255	29	317
544	0.0002165	51	173	22	295
545	0.0001914	107	200	20	293
546	0.0002461	260	317	27	374
547	0.000181	182	237	27	292
548	0.0002203	71	162	18	253
549	0.0001963	71	161	26	251
550	0.0002453	163	222	29	281
551	0.0002142	46	163	26	280
552	0.000221	148	219	29	290
553	0.0002244	157	221	26	285
554	0.000184	164	221	24	278
555	0.0001886	164	238	24	312
556	0.0002013	165	232	25	299
557	0.000202	5	125	20	245
558	0.0002002	68	185	20	302
559	0.0001966	15	122	13	229
560	0.0002715	3	146	26	289
561	0.0001883	65	156	22	247
562	0.0002135	107	193	24	279
563	0.0002207	65	164	15	263
564	0.0001828	132	218	28	304
565	0.0002111	152	205	28	258
566	0.0001692	280	310	28	340
567	0.000194	84	147	23	210
568	0.0002189	41	144	14	247
569	0.0001913	249	305	27	361
570	0.0001894	150	219	27	288
571	0.0002282	67	156	18	245
572	0.0002005	266	310	27	354
573	0.0002201	216	278	27	340
574	0.0002023	43	152	20	261
575	0.0002097	96	178	26	260
576	0.0002286	43	151	21	259
577	0.0002155	60	150	19	240
578	0.0002086	242	291	27	340
579	0.0002129	27	144	21	261
580	0.000222	208	259	26	310
581	0.0002147	16	157	20	298
582	0.0002299	60	169	20	278
583	0.0002016	63	154	22	245
584	0.0002011	152	221	26	290
585	0.0002006	94	168	27	242
586	0.0001908	227	286	23	345
587	0.0002044	113	180	21	247
588	0.0001877	128	193	29	258
589	0.0002337	197	240	29	283
590	0.000221	222	272	26	322
591	0.0002051	106	188	24	270
592	0.0002851	214	249	25	284
593	0.0002269	4	122	16	240
594	0.0001865	86	157	28	228
595	0.0002032	56	183	23	310
596	0.0002345	208	263	29	318
597	0.0002138	84	176	22	268
598	0.0001739	252	288	27	324
599	0.0002013	51	163	25	275
600	0.0002108	98	182	21	266
601	0.0001977	44	167	27	290
602	0.0001925	62	155	20	248
603	0.0001974	261	303	26	345
604	0.0002083	94	163	18	232
605	0.0002342	20	142	17	264
606	0.0001852	207	262	29	317
607	0.0002795	218	277	23	336
608	0.0001967	107	206	28	305
609	0.0001847	150	224	22	298
610	0.0001853	81	161	16	241
611	0.0002524	77	169	24	261
612	0.0002052	173	226	24	279
613	0.0001849	159	221	26	283
614	0.000245	87	178	28	269
615	0.0002228	78	180	29	282
616	0.0002373	201	261	23	321
617	0.0002119	91	197	28	303
618	0.0001847	96	175	19	254
619	0.0001733	94	157	17	220
620	0.0002125	163	233	29	303
621	0.000253	99	180	28	261
622	0.0001871	283	311	26	339
623	0.0001636	241	274	26	307
624	0.0001879	226	265	29	304
625	0.0001742	186	234	28	282
626	0.0001848	232	301	22	370
627	0.0001797	160	227	19	294
628	0.0001816	96	190	19	284
629	0.0002472	43	132	16	221
630	0.0001944	26	139	25	252
631	0.0002567	78	149	25	220
632	0.0002079	16	147	20	278
633	0.0001726	185	235	25	285
634	0.0002282	160	258	27	356
635	0.0002137	192	260	27	328
636	0.000207	96	181	29	266
637	0.000184	77	173	17	269
638	0.0001751	204	247	28	290
639	0.0001785	349	379	29	409
640	0.0001969	74	178	27	282
641	0.0002077	164	229	21	294
642	0.0002272	5	134	28	263
643	0.0002049	169	218	27	267
644	0.0001834	72	156	21	240
645	0.0001963	196	254	25	312
646	0.0002004	156	220	25	284
647	0.0001958	51	145	21	239
648	0.0002206	220	267	27	314
649	0.0001983	72	174	19	276
650	0.0001902	173	235	19	297
651	0.0002325	185	246	27	307
652	0.0002055	65	140	19	215
653	0.000206	77	167	21	257
654	0.0002111	110	209	21	308
655	0.0001807	138	218	28	298
656	0.0001745	267	309	27	351
657	0.0002298	58	166	25	274
658	0.0001927	362	390	29	418
659	0.0002555	54	153	25	252
660	0.0001853	281	325	23	369
661	0.0001858	168	212	24	256
662	0.0002229	156	241	23	326
663	0.0001744	185	252	26	319
664	0.0002009	39	143	18	247
665	0.0002302	43	150	24	257
666	0.0002554	91	191	24	291
667	0.0002085	71	137	25	203
668	0.0002077	112	199	19	286
669	0.0001981	39	162	17	285
670	0.000234	90	187	20	284
671	0.0001946	134	210	20	286
672	0.0002104	94	177	24	260
673	0.0001965	80	175	20	270
674	0.0002042	154	204	26	254
675	0.0002275	31	147	23	263
676	0.0001942	117	192	26	267
677	0.0002231	195	256	24	317
678	0.0001996	115	194	27	273
679	0.0002052	74	165	17	256
680	0.000213	42	167	26	292
681	0.0002177	58	147	19	236
682	0.0002107	100	204	26	308
683	0.000172	276	312	27	348
684	0.0002067	116	198	23	280
685	0.0002117	165	216	21	267
686	0.0002052	256	303	28	350
687	0.000183	116	191	21	266
688	0.0001999	117	182	27	247
689	0.0001765	133	193	17	253
690	0.0002386	117	198	24	279
691	0.0002051	74	162	25	250
692	0.000187	221	271	27	321
693	0.000227	83	184	21	285
694	0.0002354	55	166	25	277
695	0.0001734	241	290	25	339
696	0.0002003	72	174	29	276
697	0.0001886	143	224	28	305
698	0.0002112	102	209	22	316
699	0.0002051	227	291	28	355
700	0.0002018	171	225	25	279
701	0.0002008	25	131	27	237
702	0.0002346	99	172	25	245
703	0.0001945	213	255	25	297
704	0.0001835	168	244	29	320
705	0.0001928	97	209	20	321
706	0.000196	204	264	27	324
707	0.0002069	98	177	19	256
708	0.0001875	144	236	21	328
709	0.0001916	126	176	28	226
710	0.0001739	158	226	26	294
711	0.0002162	216	281	28	346
712	0.0001817	210	263	28	316
713	0.0001834	208	256	25	304
714	0.0002445	222	281	27	340
715	0.000184	139	212	27	285
716	0.0002109	81	179	21	277
717	0.0002185	80	173	17	266
718	0.0002214	95	205	19	315
719	0.0002286	67	197	23	327
720	0.0002137	54	163	20	272
721	0.0001922	72	165	24	258
722	0.0001723	157	214	25	271
723	0.000214	173	236	25	299
724	0.0002142	10	129	19	248
725	0.0002267	108	181	24	254
726	0.0002142	50	153	15	256
727	0.0001948	104	187	21	270
728	0.0002138	128	213	26	298
729	0.000214	25	150	26	275
730	0.0002081	99	180	18	261
731	0.0001854	233	278	29	323
732	0.0002182	112	181	17	250
733	0.0002342	98	202	26	306
734	0.0001747	202	261	28	320
735	0.0001995	328	363	28	398
736	0.0002068	146	222	27	298
737	0.0002029	214	285	29	356
738	0.0002358	101	177	22	253
739	0.0002037	131	216	21	301
740	0.0002165	61	156	20	251
741	0.0001846	157	224	18	291
742	0.0001785	130	189	29	248
743	0.000195	49	168	19	287
744	0.0002671	123	223	19	323
745	0.0002039	148	199	21	250
746	0.0001883	75	153	24	231
747	0.0001986	103	185	17	267
748	0.0001911	108	204	27	300
749	0.0001863	180	248	26	316
750	0.0002127	95	175	20	255
751	0.0001947	150	235	24	320
752	0.0001947	76	158	23	240
753	0.0002134	45	153	19	261
754	0.0001871	130	193	23	256
755	0.0002042	23	125	18	227
756	0.0002574	168	226	22	284
757	0.0002192	123	209	21	295
758	0.000209	132	214	22	296
759	0.0002099	156	239	20	322
760	0.0001886	96	188	21	280
761	0.0001806	135	189	29	243
762	0.0001982	154	212	20	270
763	0.0002222	38	159	26	280
764	0.0002235	102	196	23	290
765	0.0001854	129	212	29	295
766	0.0002099	256	303	29	350
767	0.0002147	129	213	20	297
768	0.0001981	256	297	25	338
769	0.0001816	273	309	29	345
770	0.0002385	60	162	26	264
771	0.0002225	70	159	19	248
772	0.0001886	154	212	29	270
773	0.0002088	123	177	24	231
774	0.0002029	158	220	27	282
775	0.0001832	84	167	26	250
776	0.0001943	205	245	28	285
777	0.0001837	89	172	24	255
778	0.0002041	14	121	26	228
779	0.0002194	58	159	25	260
780	0.0002196	35	149	21	263
781	0.0001755	150	217	22	284
782	0.0001801	151	235	22	319
783	0.000183	146	209	22	272
784	0.0001782	232	293	26	354
785	0.0002083	83	188	21	293
786	0.0002036	133	195	20	257
787	0.0002044	72	160	20	248
788	0.000185	146	226	26	306
789	0.0001903	160	237	25	314
790	0.0002202	226	256	24	286
791	0.0001942	108	190	29	272
792	0.0001895	82	181	24	280
793	0.0002095	20	155	26	290
794	0.0002002	39	147	18	255
795	0.0002252	22	156	19	290
796	0.0002208	106	180	27	254
797	0.0001956	198	250	28	302
798	0.0002039	172	233	28	294
799	0.0002442	89	171	27	253
800	0.0002291	28	150	19	272
801	0.0001816	103	197	22	291
802	0.0002241	81	181	24	281
803	0.000193	103	204	18	305
804	0.0002172	33	161	28	289
805	0.0001909	186	265	29	344
806	0.0002097	259	298	29	337
807	0.0001823	146	219	27	292
808	0.0001864	92	140	17	188
809	0.0001906	186	268	27	350
810	0.0002262	181	255	29	329
811	0.0001941	7	114	17	221
812	0.0001911	118	171	19	224
813	0.0002365	56	150	21	244
814	0.0001978	91	187	24	283
815	0.0002154	231	280	28	329
816	0.0002185	79	169	29	259
817	0.0002156	95	176	26	257
818	0.0002028	111	203	24	295
819	0.0001868	136	212	25	288
820	0.0002055	68	171	19	274
821	0.0001975	217	273	25	329
822	0.0002059	176	218	21	260
823	0.0002209	113	173	21	233
824	0.0002305	91	176	19	261
825	0.0002102	244	308	27	372
826	0.0002236	13	156	23	299
827	0.0002348	57	125	21	193
828	0.0002016	238	292	27	346
829	0.0002073	76	163	28	250
830	0.0002127	26	157	28	288
831	0.0002235	126	197	21	268
832	0.0002214	62	159	23	256
833	0.000199	97	186	22	275
834	0.0002428	63	156	18	249
835	0.0002048	123	186	23	249
836	0.000271	52	173	23	294
837	0.0001724	230	268	25	306
838	0.0002688	17	168	23	319
839	0.0002326	6	152	20	298
840	0.0002001	110	215	29	320
841	0.0001939	36	141	29	246
842	0.0002526	145	205	20	265
843	0.0002132	151	229	27	307
844	0.0001755	161	225	28	289
845	0.000197	269	331	28	393
846	0.0002257	142	215	20	288
847	0.0001924	110	190	19	270
848	0.0002135	109	190	24	271
849	0.00019	140	192	18	244
850	0.0001937	148	224	18	300
851	0.0001975	315	350	28	385
852	0.0002152	10	128	21	246
853	0.0002006	205	242	29	279
854	0.000212	221	271	26	321
855	0.0001929	34	150	21	266
856	0.0001879	192	238	26	284
857	0.0002161	81	142	19	203
858	0.0001867	119	187	23	255
859	0.0002222	90	194	25	298
860	0.0001735	224	289	29	354
861	0.0002143	122	182	22	242
862	0.0001872	285	326	29	367
863	0.000176	221	272	26	323
864	0.0001778	227	283	28	339
865	0.0002029	33	155	24	277
866	0.0002165	78	187	26	296
867	0.0001991	303	334	27	365
868	0.0002045	171	231	26	291
869	0.0002072	208	253	29	298
870	0.0001695	327	364	28	401
871	0.0001946	17	139	16	261
872	0.0002236	45	137	22	229
873	0.0002153	136	213	18	290
874	0.0001857	131	184	25	237
875	0.0001873	82	169	14	256
876	0.0002262	290	332	28	374
877	0.0001948	89	193	29	297
878	0.0002181	45	150	19	255
879	0.0001906	64	160	28	256
880	0.0001834	254	297	28	340
881	0.0001999	34	140	26	246
882	0.0002073	158	212	26	266
883	0.0002269	1	141	28	281
884	0.0002584	194	252	27	310
885	0.0001972	220	271	25	322
886	0.0001957	205	244	24	283
887	0.0002151	202	261	24	320
888	0.0002089	114	196	26	278
889	0.000209	207	259	29	311
890	0.0002189	148	213	25	278
891	0.000181	200	257	22	314
892	0.0001972	123	205	27	287
893	0.0002052	99	173	18	247
894	0.0002305	56	143	19	230
895	0.0002189	11	132	18	253
896	0.0001964	10	108	15	206
897	0.000219	65	174	21	283
898	0.0001841	267	319	27	371
899	0.0001869	115	188	27	261
900	0.000197	83	177	21	271
901	0.0002218	15	135	22	255
902	0.0002053	195	248	24	301
903	0.0001904	49	133	19	217
904	0.0001978	165	243	29	321
905	0.0001736	207	255	26	303
906	0.0001953	215	272	29	329
907	0.0001934	188	244	25	300
908	0.0002097	85	152	22	219
909	0.0002082	92	200	26	308
910	0.0002108	209	265	26	321
911	0.00019	122	209	23	296
912	0.0001825	104	179	23	254
913	0.000202	116	209	27	302
914	0.0002461	223	279	21	335
915	0.0002025	102	187	25	272
916	0.0002144	88	178	27	268
917	0.0002034	139	212	26	285
918	0.0002034	168	224	24	280
919	0.0001983	18	133	22	248
920	0.0002267	83	167	26	251
921	0.0001973	134	229	28	324
922	0.0002583	91	197	27	303
923	0.0001921	231	279	28	327
924	0.0002049	15	139	26	263
925	0.0002203	107	202	29	297
926	0.0002163	135	222	21	309
927	0.000237	8	126	22	244
928	0.0002242	124	197	28	270
929	0.0001995	181	264	28	347
930	0.0002033	192	254	20	316
931	0.0002568	151	217	21	283
932	0.0002066	69	173	28	277
933	0.0002032	182	235	25	288
934	0.0001979	110	193	29	276
935	0.0001959	94	189	20	284
936	0.0002369	62	156	17	250
937	0.0001923	196	253	26	310
938	0.000203	117	204	20	291
939	0.0001896	241	295	21	349
940	0.000234	100	199	23	298
941	0.0001872	222	274	26	326
942	0.0001795	156	218	24	280
943	0.0001912	92	168	28	244
944	0.0002054	50	152	24	254
945	0.0001878	174	243	25	312
946	0.0002383	45	133	18	221
947	0.000187	269	305	29	341
948	0.0001829	161	218	29	275
949	0.0002275	133	202	29	271
950	0.0002063	231	271	27	311
951	0.0002074	37	142	25	247
952	0.0002197	165	224	23	283
953	0.0001888	113	221	23	329
954	0.0001924	207	262	23	317
955	0.0001808	202	247	24	292
956	0.0001901	169	237	27	305
957	0.0002047	187	246	26	305
958	0.0002106	92	175	26	258
959	0.0001993	236	290	27	344
960	0.0002354	93	161	20	229
961	0.0002013	208	267	28	326
962	0.000245	173	228	21	283
963	0.0001986	229	291	27	353
964	0.0002147	110	197	25	284
965	0.0001939	4	108	12	212
966	0.0001757	174	225	23	276
967	0.000221	96	176	19	256
968	0.0001746	226	275	28	324
969	0.0002032	168	232	28	296
970	0.0001951	211	264	25	317
971	0.000214	73	173	18	273
972	0.0002023	66	164	19	262
973	0.0001787	161	229	29	297
974	0.0002131	143	203	19	263
975	0.0002017	161	229	21	297
976	0.0001957	101	185	20	269
977	0.0002385	56	175	28	294
978	0.0001981	27	138	20	249
979	0.0001637	227	275	27	323
980	0.0002157	118	223	25	328
981	0.0002014	79	173	22	267
982	0.0002152	212	263	26	314
983	0.0002117	218	276	24	334
984	0.0002236	104	199	29	294
985	0.0002321	132	207	29	282
986	0.0002078	11	134	18	257
987	0.000198	53	150	17	247
988	0.0002508	28	163	29	298
989	0.0002146	125	196	25	267
990	0.0002354	72	143	23	214
991	0.000231	3	133	28	263
992	0.0002127	126	198	25	270
993	0.0001879	183	255	24	327
994	0.000176	128	199	27	270
995	0.0002042	32	131	14	230
996	0.000187	179	239	23	299
997	0.0001762	223	280	28	337
998	0.0001786	201	245	28	289
999	0.0001951	92	175	15	258
mean	0.000206576	132.077	209.814	23.966	287.551

## Sheet: GS_FemaleOpt
	time	SEq	Bal	Reg	Egal
0	0.0001867	110	203	16	296
1	0.0002201	281	332	28	383
2	0.0001918	38	137	16	236
3	0.0002366	108	189	28	270
4	0.000168	232	280	29	328
5	0.000196	54	139	18	224
6	0.0001921	74	190	25	306
7	0.0001648	175	223	28	271
8	0.0001591	253	281	26	309
9	0.0001788	103	175	20	247
10	0.0002002	26	141	18	256
11	0.0001857	110	193	18	276
12	0.000178	208	265	29	322
13	0.0001796	165	241	24	317
14	0.0001771	137	209	23	281
15	0.0002463	106	189	20	272
16	0.000178	197	267	26	337
17	0.0001875	124	210	27	296
18	0.0002131	34	159	23	284
19	0.0001847	98	196	20	294
20	0.0001816	138	225	23	312
21	0.000177	169	244	29	319
22	0.00017	223	267	29	311
23	0.0001911	122	193	24	264
24	0.0001916	16	137	16	258
25	0.0003443	56	157	24	258
26	0.0001829	145	207	23	269
27	0.0001687	171	233	21	295
28	0.0001686	146	195	27	244
29	0.0001749	279	313	29	347
30	0.0001699	155	219	28	283
31	0.0001626	345	368	28	391
32	0.0001746	170	246	26	322
33	0.000204	90	170	17	250
34	0.0001719	200	247	23	294
35	0.0001977	124	223	29	322
36	0.0001781	158	221	29	284
37	0.0001826	114	194	26	274
38	0.0001909	95	182	24	269
39	0.0001983	79	164	23	249
40	0.0001751	192	253	28	314
41	0.0001873	140	224	27	308
42	0.0001895	119	190	29	261
43	0.0001668	278	329	29	380
44	0.0002006	20	132	29	244
45	0.0001768	130	204	29	278
46	0.0001729	197	255	23	313
47	0.0001755	219	275	28	331
48	0.0002723	35	160	29	285
49	0.0001905	39	149	16	259
50	0.0002305	133	204	26	275
51	0.0002133	15	135	26	255
52	0.0001664	214	271	27	328
53	0.0002318	68	168	25	268
54	0.0002148	210	242	22	274
55	0.000181	123	208	24	293
56	0.0002115	165	219	27	273
57	0.0003902	31	148	25	265
58	0.0001763	153	230	29	307
59	0.0001724	217	262	26	307
60	0.0001949	93	186	22	279
61	0.000175	256	299	28	342
62	0.0001971	12	132	18	252
63	0.000199	204	281	21	358
64	0.0001723	142	208	23	274
65	0.0001754	184	243	23	302
66	0.0001898	1	127	18	253
67	0.0001715	224	271	26	318
68	0.0001898	208	265	27	322
69	0.0001757	101	181	22	261
70	0.0001888	18	135	19	252
71	0.000176	115	194	25	273
72	0.0001812	58	150	16	242
73	0.0001642	249	289	28	329
74	0.0001738	240	296	27	352
75	0.0002037	41	155	23	269
76	0.0001995	124	186	18	248
77	0.0001705	208	260	29	312
78	0.0001738	295	348	29	401
79	0.0001954	61	153	25	245
80	0.0001768	263	305	22	347
81	0.000203	112	183	27	254
82	0.0001783	210	282	27	354
83	0.0001856	191	249	28	307
84	0.0001967	5	114	16	223
85	0.0001762	171	226	29	281
86	0.0001998	46	133	12	220
87	0.0001922	165	219	29	273
88	0.0001951	173	259	27	345
89	0.0001733	156	212	29	268
90	0.0001732	225	287	28	349
91	0.0001911	133	208	20	283
92	0.000187	43	138	22	233
93	0.0001804	127	201	27	275
94	0.0001777	110	184	20	258
95	0.0001705	217	253	22	289
96	0.0002025	25	139	20	253
97	0.0001833	228	295	29	362
98	0.0001855	81	178	28	275
99	0.0002064	21	143	21	265
100	0.000199	35	150	25	265
101	0.0001692	202	251	23	300
102	0.0001898	29	133	23	237
103	0.000178	144	223	27	302
104	0.0001657	269	305	29	341
105	0.000171	200	258	26	316
106	0.0002103	11	149	18	287
107	0.0002014	69	164	19	259
108	0.0001823	92	172	16	252
109	0.0001763	201	250	29	299
110	0.0001716	140	210	27	280
111	0.0001793	105	176	22	247
112	0.0001922	58	175	24	292
113	0.000182	197	257	27	317
114	0.0001646	210	252	23	294
115	0.0001805	115	172	25	229
116	0.0002005	10	128	20	246
117	0.0001829	20	128	16	236
118	0.0001683	191	248	29	305
119	0.0001744	149	209	28	269
120	0.0001795	86	177	18	268
121	0.000203	136	208	28	280
122	0.000184	54	139	26	224
123	0.0001721	110	167	26	224
124	0.0001732	245	299	26	353
125	0.0001965	31	162	28	293
126	0.0002539	4	122	23	240
127	0.0001744	164	234	19	304
128	0.0001757	119	194	16	269
129	0.0001882	60	165	26	270
130	0.000183	121	202	26	283
131	0.0001888	82	169	19	256
132	0.0002103	135	203	27	271
133	0.0001866	88	159	21	230
134	0.0001699	170	222	20	274
135	0.0001689	245	292	28	339
136	0.0001767	246	291	25	336
137	0.0001735	201	266	29	331
138	0.0001781	209	270	28	331
139	0.0001748	132	209	18	286
140	0.0001776	224	275	29	326
141	0.0001698	170	227	23	284
142	0.0001812	297	343	29	389
143	0.0001833	184	256	22	328
144	0.0002037	138	216	21	294
145	0.0001646	209	256	26	303
146	0.000172	246	299	29	352
147	0.0001933	15	133	17	251
148	0.0001868	15	130	18	245
149	0.0002055	229	288	25	347
150	0.0001882	143	206	23	269
151	0.000211	157	230	25	303
152	0.0001871	109	191	26	273
153	0.0001725	97	163	19	229
154	0.0001821	69	146	17	223
155	0.0001848	106	185	26	264
156	0.0001746	145	215	23	285
157	0.0001836	92	178	17	264
158	0.0002083	44	143	22	242
159	0.0001826	156	230	25	304
160	0.0001962	1	118	15	235
161	0.0001932	53	181	27	309
162	0.0002036	22	130	14	238
163	0.0001792	93	181	22	269
164	0.0002342	145	218	28	291
165	0.000173	128	197	27	266
166	0.0002154	11	131	26	251
167	0.00018	91	181	27	271
168	0.0002025	113	191	19	269
169	0.0002065	62	151	15	240
170	0.000184	55	138	25	221
171	0.0001737	134	201	17	268
172	0.000228	75	169	17	263
173	0.0001976	181	257	24	333
174	0.0001805	169	242	28	315
175	0.0001743	178	234	26	290
176	0.0002077	0	132	17	264
177	0.000195	49	157	16	265
178	0.0001798	211	284	26	357
179	0.0001704	229	271	25	313
180	0.0001645	269	316	26	363
181	0.0001858	25	136	16	247
182	0.0001786	154	207	17	260
183	0.0002334	144	233	28	322
184	0.0001702	209	259	28	309
185	0.0001833	132	203	21	274
186	0.0001924	81	194	22	307
187	0.0001762	172	235	24	298
188	0.0002018	28	155	17	282
189	0.0001786	148	220	15	292
190	0.0001813	96	190	18	284
191	0.0002252	142	184	20	226
192	0.0001722	211	277	27	343
193	0.0001765	166	232	28	298
194	0.0001755	121	194	28	267
195	0.000198	1	127	24	253
196	0.0001905	36	158	22	280
197	0.0001903	79	180	28	281
198	0.0001636	209	253	25	297
199	0.0001748	190	259	24	328
200	0.0001751	138	220	29	302
201	0.0001784	142	210	18	278
202	0.0001858	89	191	24	293
203	0.0001851	91	189	25	287
204	0.0001878	34	135	16	236
205	0.0002019	133	222	24	311
206	0.0001925	117	175	23	233
207	0.0002261	103	168	15	233
208	0.0001854	109	198	27	287
209	0.0001796	126	182	17	238
210	0.0001844	193	265	28	337
211	0.0001827	125	210	25	295
212	0.0002365	201	286	29	371
213	0.0002036	89	169	27	249
214	0.0001817	94	173	28	252
215	0.000177	122	198	22	274
216	0.0001729	166	223	21	280
217	0.0001708	118	191	24	264
218	0.0001778	188	247	18	306
219	0.0001913	138	215	29	292
220	0.000217	5	133	17	261
221	0.0001831	152	233	24	314
222	0.0001814	95	189	26	283
223	0.0001793	269	313	27	357
224	0.0001773	169	229	26	289
225	0.000302	83	167	21	251
226	0.0001707	226	277	27	328
227	0.0001869	59	165	18	271
228	0.0001753	167	230	20	293
229	0.0001768	105	186	23	267
230	0.0001728	176	237	22	298
231	0.0001699	174	226	29	278
232	0.000201	157	223	24	289
233	0.0001908	101	192	26	283
234	0.0001689	232	272	28	312
235	0.0001751	142	212	23	282
236	0.0001855	58	168	26	278
237	0.0001771	240	303	26	366
238	0.0001984	139	207	27	275
239	0.0001907	232	285	29	338
240	0.0001765	201	266	25	331
241	0.0001906	150	230	25	310
242	0.000184	116	205	26	294
243	0.0002019	19	125	20	231
244	0.000193	137	224	24	311
245	0.000221	55	156	18	257
246	0.0001913	51	183	16	315
247	0.0001819	64	165	26	266
248	0.0001759	159	238	28	317
249	0.000189	84	189	27	294
250	0.0001737	116	177	24	238
251	0.0002012	11	129	17	247
252	0.0001732	230	291	23	352
253	0.0002285	116	198	17	280
254	0.0001713	239	284	26	329
255	0.0002063	254	303	29	352
256	0.0001874	166	231	28	296
257	0.0001876	207	262	29	317
258	0.0001718	134	187	24	240
259	0.0001808	142	203	28	264
260	0.0001617	340	369	28	398
261	0.0001937	31	147	18	263
262	0.0001826	111	183	24	255
263	0.0001842	103	199	29	295
264	0.0001827	84	167	25	250
265	0.0002264	141	234	26	327
266	0.0001923	106	207	20	308
267	0.0002279	76	166	23	256
268	0.0001793	153	226	23	299
269	0.0001686	153	213	17	273
270	0.0001843	125	209	24	293
271	0.0001823	172	244	25	316
272	0.0001945	185	239	26	293
273	0.0001863	95	188	20	281
274	0.000168	198	250	29	302
275	0.0001723	305	331	27	357
276	0.0001923	189	251	28	313
277	0.000182	89	173	28	257
278	0.0001761	126	190	24	254
279	0.0001967	178	254	28	330
280	0.0001842	77	162	20	247
281	0.000177	147	238	27	329
282	0.0001733	221	272	25	323
283	0.0001887	91	183	23	275
284	0.0001752	308	333	28	358
285	0.0001741	249	301	28	353
286	0.0001866	210	260	28	310
287	0.0001895	52	170	15	288
288	0.0001759	192	256	26	320
289	0.0002029	151	236	28	321
290	0.0001935	106	201	29	296
291	0.0001813	124	197	25	270
292	0.0001775	160	224	28	288
293	0.0002063	102	195	25	288
294	0.0001956	28	147	22	266
295	0.0001798	250	302	23	354
296	0.000181	192	253	27	314
297	0.0001751	174	244	25	314
298	0.0001927	3	135	22	267
299	0.0001761	153	233	18	313
300	0.000178	118	196	20	274
301	0.000213	55	158	21	261
302	0.0001882	114	199	24	284
303	0.0001848	169	226	29	283
304	0.0001954	219	267	25	315
305	0.0001872	22	110	13	198
306	0.0001915	56	153	27	250
307	0.0001819	140	227	28	314
308	0.0002098	87	167	21	247
309	0.0001677	169	224	26	279
310	0.0001785	90	171	20	252
311	0.0001713	184	239	20	294
312	0.0001873	60	162	23	264
313	0.0001824	89	174	19	259
314	0.00017	103	169	19	235
315	0.0001637	183	224	26	265
316	0.0001716	109	171	21	233
317	0.0001725	140	212	28	284
318	0.0001803	91	173	21	255
319	0.0001873	103	189	22	275
320	0.0001784	111	174	24	237
321	0.0001751	110	179	21	248
322	0.0001802	150	228	28	306
323	0.0001771	180	227	27	274
324	0.0001855	88	183	25	278
325	0.0001868	241	307	27	373
326	0.0001921	118	194	19	270
327	0.0001757	118	190	23	262
328	0.0001947	193	270	27	347
329	0.0001768	125	196	22	267
330	0.0002173	49	161	19	273
331	0.0001992	137	217	28	297
332	0.0002015	25	135	14	245
333	0.0001876	54	140	20	226
334	0.0001836	149	216	25	283
335	0.0001804	134	204	27	274
336	0.0001765	202	259	26	316
337	0.0001806	73	158	25	243
338	0.0002129	124	192	23	260
339	0.0001822	123	209	24	295
340	0.0002145	62	170	28	278
341	0.0001727	169	227	26	285
342	0.0001866	104	199	23	294
343	0.000172	165	215	21	265
344	0.0001971	64	159	25	254
345	0.0001782	100	175	26	250
346	0.0001778	130	208	20	286
347	0.0001872	143	236	24	329
348	0.000185	92	181	19	270
349	0.0001884	46	151	20	256
350	0.0001873	52	146	14	240
351	0.0001859	157	221	28	285
352	0.0001683	301	334	29	367
353	0.000177	106	185	25	264
354	0.0002526	57	164	25	271
355	0.0001798	274	309	24	344
356	0.0002089	116	183	26	250
357	0.0001753	193	252	28	311
358	0.0002079	285	317	28	349
359	0.0001652	172	210	27	248
360	0.000203	96	176	18	256
361	0.0001794	131	216	29	301
362	0.0001717	178	234	25	290
363	0.000176	171	227	23	283
364	0.0001744	160	221	26	282
365	0.0001864	54	157	16	260
366	0.0001742	138	203	22	268
367	0.000179	78	167	24	256
368	0.0001712	200	257	24	314
369	0.0001882	142	208	28	274
370	0.0001771	140	218	22	296
371	0.0001795	63	158	19	253
372	0.0002156	33	153	17	273
373	0.000172	147	206	27	265
374	0.0001764	84	156	17	228
375	0.0001677	213	262	27	311
376	0.0001881	39	138	22	237
377	0.0001896	227	276	24	325
378	0.0001852	102	186	21	270
379	0.0001684	236	271	29	306
380	0.0001889	121	203	25	285
381	0.0001806	116	213	26	310
382	0.0001684	284	335	28	386
383	0.0001846	94	186	21	278
384	0.0001827	118	199	26	280
385	0.0001811	250	293	26	336
386	0.0001759	199	251	29	303
387	0.000178	129	190	22	251
388	0.0001868	102	175	20	248
389	0.000182	116	205	20	294
390	0.0001803	162	227	18	292
391	0.0001675	194	248	22	302
392	0.0002205	56	152	21	248
393	0.0002017	123	191	25	259
394	0.0001664	250	298	28	346
395	0.0002473	23	148	17	273
396	0.000243	29	137	18	245
397	0.0002179	173	238	28	303
398	0.0001871	71	183	26	295
399	0.0001823	190	260	28	330
400	0.0001955	141	220	27	299
401	0.0001736	269	323	27	377
402	0.0001828	154	233	22	312
403	0.0001797	119	201	24	283
404	0.0002446	188	242	29	296
405	0.000165	253	300	24	347
406	0.0001864	120	198	27	276
407	0.0001762	166	235	28	304
408	0.0001795	155	223	22	291
409	0.0001943	136	215	26	294
410	0.0001802	58	150	26	242
411	0.0001714	170	214	28	258
412	0.0001846	77	164	21	251
413	0.0001772	181	234	29	287
414	0.0001721	246	278	23	310
415	0.0001986	29	130	14	231
416	0.0001892	63	170	16	277
417	0.0001904	32	150	22	268
418	0.0001742	173	236	29	299
419	0.0001711	150	196	25	242
420	0.0001674	223	269	28	315
421	0.0001838	116	196	18	276
422	0.0001746	167	219	24	271
423	0.0002013	250	296	27	342
424	0.0001863	171	244	26	317
425	0.0001797	164	222	26	280
426	0.0001839	158	235	27	312
427	0.0002393	30	136	28	242
428	0.0001852	167	223	26	279
429	0.0001689	194	245	29	296
430	0.0001722	250	309	26	368
431	0.0001741	105	188	26	271
432	0.0001816	85	174	25	263
433	0.0001998	62	168	18	274
434	0.0002217	173	254	29	335
435	0.000168	261	311	29	361
436	0.0001935	110	185	27	260
437	0.0001855	133	210	29	287
438	0.0001885	127	209	25	291
439	0.0002034	306	350	29	394
440	0.0001919	158	239	29	320
441	0.0001775	108	193	28	278
442	0.0001761	151	221	23	291
443	0.0001643	300	346	29	392
444	0.0001689	190	239	28	288
445	0.0001846	33	146	14	259
446	0.0001702	181	244	27	307
447	0.0001675	168	220	17	272
448	0.0001873	38	143	20	248
449	0.0003007	124	216	22	308
450	0.0001836	228	274	29	320
451	0.0002031	20	143	15	266
452	0.0001665	260	307	28	354
453	0.0001711	187	248	28	309
454	0.0001906	139	217	24	295
455	0.0001913	98	192	25	286
456	0.0001765	143	220	26	297
457	0.0001943	165	251	25	337
458	0.0001702	186	242	29	298
459	0.0001899	56	167	24	278
460	0.000169	247	290	29	333
461	0.0001757	168	211	24	254
462	0.0001742	163	222	28	281
463	0.0001908	138	201	20	264
464	0.000195	73	169	27	265
465	0.0001752	260	293	29	326
466	0.0001663	343	371	29	399
467	0.0001754	207	259	23	311
468	0.0001952	93	196	27	299
469	0.0001895	94	201	24	308
470	0.0001892	142	223	24	304
471	0.0001665	167	220	25	273
472	0.0002082	19	160	23	301
473	0.000161	347	371	29	395
474	0.0001789	128	197	23	266
475	0.0001686	331	376	28	421
476	0.0001895	4	124	22	244
477	0.0001736	181	238	28	295
478	0.0001785	156	218	25	280
479	0.0001886	163	209	28	255
480	0.0001878	62	158	23	254
481	0.0002314	206	265	22	324
482	0.0002061	50	159	19	268
483	0.0001666	242	280	17	318
484	0.000225	121	195	21	269
485	0.0002101	47	158	23	269
486	0.0001822	172	227	20	282
487	0.0001816	168	246	25	324
488	0.0001766	85	155	28	225
489	0.0001662	277	324	25	371
490	0.0001643	314	350	26	386
491	0.0001792	196	261	29	326
492	0.0002155	126	210	19	294
493	0.0001912	159	224	22	289
494	0.0001761	141	201	26	261
495	0.0001956	64	169	17	274
496	0.000172	222	291	24	360
497	0.0001783	264	310	27	356
498	0.0001859	61	158	20	255
499	0.0001786	107	185	27	263
500	0.0002143	240	286	26	332
501	0.000179	32	121	21	210
502	0.0002197	114	205	27	296
503	0.0001988	6	138	23	270
504	0.0001763	119	196	27	273
505	0.0001967	124	207	25	290
506	0.0002115	29	148	19	267
507	0.0001749	207	263	24	319
508	0.0001921	111	211	25	311
509	0.0001767	121	188	14	255
510	0.0001802	207	275	27	343
511	0.0001926	40	154	22	268
512	0.0001758	186	262	28	338
513	0.0001874	142	226	22	310
514	0.0001809	276	308	28	340
515	0.0001687	231	289	29	347
516	0.0001796	96	167	28	238
517	0.0001622	249	289	28	329
518	0.0001824	48	147	24	246
519	0.0001818	205	265	25	325
520	0.0001778	132	206	25	280
521	0.0001919	111	184	18	257
522	0.0001794	185	248	25	311
523	0.0001664	131	179	20	227
524	0.0001649	183	230	28	277
525	0.0001625	304	319	28	334
526	0.0001889	251	290	27	329
527	0.0001834	142	222	28	302
528	0.0002226	94	183	19	272
529	0.0001892	99	200	19	301
530	0.0001909	127	227	25	327
531	0.0001881	102	183	25	264
532	0.0001847	18	125	16	232
533	0.0002017	83	167	19	251
534	0.0001853	205	262	26	319
535	0.0001919	144	216	23	288
536	0.0001895	190	253	28	316
537	0.000201	49	160	16	271
538	0.0001795	152	216	24	280
539	0.0001747	207	254	27	301
540	0.0002149	142	213	25	284
541	0.0001802	165	222	21	279
542	0.0001826	89	185	19	281
543	0.0002005	168	238	27	308
544	0.0001784	85	169	21	253
545	0.0001719	291	338	25	385
546	0.0001987	74	186	23	298
547	0.000177	145	220	26	295
548	0.0002202	20	135	18	250
549	0.0001872	154	226	29	298
550	0.0001828	78	155	19	232
551	0.0002019	46	163	26	280
552	0.0001819	177	249	28	321
553	0.0001869	54	154	23	254
554	0.0002063	177	242	23	307
555	0.0001751	216	279	21	342
556	0.0001848	91	182	24	273
557	0.0001799	111	181	25	251
558	0.0001764	227	285	22	343
559	0.000202	129	203	26	277
560	0.0001766	189	251	29	313
561	0.0001814	94	176	19	258
562	0.00025	156	226	25	296
563	0.0001971	136	209	28	282
564	0.0001992	137	216	26	295
565	0.0001753	117	174	24	231
566	0.0002192	73	176	15	279
567	0.0001732	135	193	21	251
568	0.0002421	80	171	28	262
569	0.0002251	30	164	22	298
570	0.0001871	40	152	20	264
571	0.000179	186	234	29	282
572	0.0001895	120	198	21	276
573	0.0001902	71	186	25	301
574	0.0001755	211	260	25	309
575	0.0001748	196	249	26	302
576	0.000183	72	174	23	276
577	0.0001686	255	291	28	327
578	0.0001821	172	242	29	312
579	0.0001998	118	203	28	288
580	0.0001885	85	164	27	243
581	0.0001689	247	297	26	347
582	0.0001875	188	258	25	328
583	0.0002028	170	227	29	284
584	0.0002067	223	267	28	311
585	0.000195	26	141	23	256
586	0.0001705	257	293	26	329
587	0.0002164	16	128	13	240
588	0.0001639	270	310	29	350
589	0.0002016	103	196	25	289
590	0.0001747	201	251	23	301
591	0.0001767	222	279	29	336
592	0.0002062	112	197	28	282
593	0.0001858	127	204	28	281
594	0.0002687	15	120	18	225
595	0.0002049	25	164	25	303
596	0.0001865	164	251	26	338
597	0.0001849	101	188	19	275
598	0.0002196	48	155	26	262
599	0.0001851	108	189	24	270
600	0.0001788	252	299	29	346
601	0.0001661	184	230	21	276
602	0.0001995	123	193	27	263
603	0.000191	113	201	20	289
604	0.0001757	110	181	28	252
605	0.0001616	252	290	23	328
606	0.0001933	116	208	27	300
607	0.0001789	172	250	25	328
608	0.0001754	114	196	27	278
609	0.0001851	71	180	26	289
610	0.0001912	49	157	26	265
611	0.000189	94	176	16	258
612	0.0001918	96	169	17	242
613	0.0001776	170	240	26	310
614	0.0001682	163	225	29	287
615	0.0001923	62	172	18	282
616	0.0001744	154	220	22	286
617	0.0001959	33	152	17	271
618	0.0001923	60	163	29	266
619	0.0001746	170	227	29	284
620	0.0001872	90	194	25	298
621	0.0002109	67	163	23	259
622	0.000174	132	193	28	254
623	0.0001768	186	241	29	296
624	0.0001702	139	190	24	241
625	0.0001803	121	180	20	239
626	0.0001775	158	228	23	298
627	0.0001905	102	193	26	284
628	0.0001681	168	240	23	312
629	0.0001712	100	174	23	248
630	0.0002016	31	135	22	239
631	0.0001737	142	206	23	270
632	0.0001641	253	302	28	351
633	0.0001764	104	172	27	240
634	0.0002066	243	298	25	353
635	0.0001721	201	264	29	327
636	0.0001912	20	126	20	232
637	0.000181	200	252	22	304
638	0.0001905	134	196	25	258
639	0.0001785	130	188	22	246
640	0.0001788	46	145	19	244
641	0.000239	217	275	28	333
642	0.0001696	97	177	21	257
643	0.0001679	180	230	23	280
644	0.0002035	25	127	17	229
645	0.0001693	259	296	28	333
646	0.0001928	4	135	21	266
647	0.0001766	110	192	29	274
648	0.0001806	170	228	20	286
649	0.0001847	58	166	20	274
650	0.0002011	159	256	25	353
651	0.0001986	41	167	20	293
652	0.0001693	146	206	23	266
653	0.000187	63	160	18	257
654	0.0001646	361	391	26	421
655	0.0001874	137	243	25	349
656	0.0001767	277	312	28	347
657	0.0002417	145	221	24	297
658	0.000193	27	149	27	271
659	0.0001861	134	201	24	268
660	0.0001639	285	317	29	349
661	0.0001816	51	134	16	217
662	0.0001903	213	267	25	321
663	0.0001755	221	277	29	333
664	0.0002418	93	168	17	243
665	0.0001682	152	201	29	250
666	0.0001948	30	162	19	294
667	0.0001812	71	135	17	199
668	0.0001945	175	243	26	311
669	0.0002157	14	151	17	288
670	0.0002055	115	193	24	271
671	0.0001704	246	286	28	326
672	0.0001889	113	177	18	241
673	0.0001736	191	259	26	327
674	0.0001986	34	136	19	238
675	0.0001895	37	145	17	253
676	0.0002326	81	169	23	257
677	0.000172	213	265	22	317
678	0.0001696	191	253	27	315
679	0.000188	182	239	29	296
680	0.0001793	168	236	29	304
681	0.000185	65	167	26	269
682	0.000174	139	209	27	279
683	0.0001869	135	230	29	325
684	0.0001694	220	270	29	320
685	0.0001755	175	228	29	281
686	0.0001976	187	250	29	313
687	0.0001769	147	210	24	273
688	0.0001757	130	202	25	274
689	0.0002377	3	129	29	255
690	0.0001885	175	226	25	277
691	0.0001867	172	240	26	308
692	0.000185	206	266	25	326
693	0.0002009	57	179	26	301
694	0.0001776	108	180	27	252
695	0.00017	187	246	27	305
696	0.0001869	109	178	21	247
697	0.0001924	72	183	22	294
698	0.0001925	271	317	28	363
699	0.0002224	308	340	26	372
700	0.0001788	167	226	26	285
701	0.0001689	111	172	23	233
702	0.0001821	57	149	28	241
703	0.0001704	223	277	28	331
704	0.0001817	188	258	24	328
705	0.0001795	146	220	20	294
706	0.0001869	195	258	25	321
707	0.0001979	12	140	23	268
708	0.0001747	172	238	28	304
709	0.0001688	168	204	22	240
710	0.0001767	187	245	29	303
711	0.0001646	264	317	29	370
712	0.0001868	74	169	19	264
713	0.0001795	252	300	28	348
714	0.000186	133	215	27	297
715	0.000174	174	236	29	298
716	0.0001756	142	222	28	302
717	0.0001815	102	187	23	272
718	0.0001848	245	301	28	357
719	0.0001635	254	298	23	342
720	0.0001679	159	225	25	291
721	0.0001652	212	251	27	290
722	0.0002115	14	120	19	226
723	0.0002035	121	209	24	297
724	0.0001836	86	172	19	258
725	0.0001751	125	195	23	265
726	0.0001857	154	241	28	328
727	0.0001942	86	171	18	256
728	0.0001758	179	237	23	295
729	0.0001662	269	310	28	351
730	0.0002515	27	153	26	279
731	0.0001942	60	168	26	276
732	0.0001811	119	180	29	241
733	0.0001646	300	339	29	378
734	0.0001894	17	132	22	247
735	0.0001717	118	181	16	244
736	0.0001751	198	245	24	292
737	0.0002078	8	152	27	296
738	0.0001809	120	195	28	270
739	0.0001697	148	208	22	268
740	0.000203	210	256	23	302
741	0.000182	92	174	22	256
742	0.0001823	92	164	18	236
743	0.0001889	399	425	27	451
744	0.0001946	98	196	23	294
745	0.0001864	107	179	29	251
746	0.0001639	222	254	28	286
747	0.0001825	190	240	27	290
748	0.0002122	43	159	23	275
749	0.0001844	119	186	19	253
750	0.0001878	48	160	26	272
751	0.0001725	273	321	29	369
752	0.0001693	200	252	25	304
753	0.0002004	45	161	26	277
754	0.0001815	118	190	26	262
755	0.0001767	276	311	27	346
756	0.0002148	179	251	29	323
757	0.0001765	226	277	28	328
758	0.0002114	193	265	29	337
759	0.0002357	3	156	20	309
760	0.0001861	50	151	24	252
761	0.0002565	6	118	18	230
762	0.0001761	155	217	16	279
763	0.0001745	125	194	23	263
764	0.0001835	98	188	19	278
765	0.0001764	220	283	29	346
766	0.000192	39	145	21	251
767	0.0001751	164	227	20	290
768	0.0001788	190	249	23	308
769	0.0001795	122	201	29	280
770	0.0001716	230	278	26	326
771	0.0002326	206	266	28	326
772	0.0001762	119	192	21	265
773	0.000169	136	194	25	252
774	0.0001925	3	123	26	243
775	0.0002161	57	149	21	241
776	0.0001746	131	181	24	231
777	0.0001672	298	338	29	378
778	0.0001753	106	167	19	228
779	0.0001734	141	201	27	261
780	0.0002019	92	179	15	266
781	0.0002388	6	134	21	262
782	0.0001867	105	200	29	295
783	0.0001875	67	171	17	275
784	0.0001642	205	239	27	273
785	0.0001774	211	278	24	345
786	0.0001979	5	119	19	233
787	0.0001797	175	238	26	301
788	0.0001766	161	233	29	305
789	0.0002201	199	263	23	327
790	0.0001932	10	122	19	234
791	0.0001883	31	144	18	257
792	0.000182	92	167	27	242
793	0.000188	74	172	20	270
794	0.0001989	12	152	23	292
795	0.0001973	156	231	24	306
796	0.0001996	41	145	19	249
797	0.0001605	268	302	26	336
798	0.0001733	176	242	29	308
799	0.0001997	114	179	26	244
800	0.0001915	130	216	19	302
801	0.0001721	271	314	26	357
802	0.000223	81	181	24	281
803	0.0001777	154	240	27	326
804	0.0001654	248	293	29	338
805	0.0002047	55	194	24	333
806	0.000197	123	212	27	301
807	0.0002316	102	191	25	280
808	0.0002066	116	178	27	240
809	0.0001994	232	277	29	322
810	0.0001913	151	238	28	325
811	0.0001741	85	153	20	221
812	0.0001682	192	233	25	274
813	0.0001773	149	215	28	281
814	0.0001815	179	233	26	287
815	0.0001828	4	108	19	212
816	0.0002563	53	157	28	261
817	0.000182	144	219	29	294
818	0.0002009	77	199	18	321
819	0.0001983	5	135	28	265
820	0.0001798	181	254	24	327
821	0.000185	187	257	28	327
822	0.0001752	122	198	25	274
823	0.0002001	151	219	23	287
824	0.0001989	239	286	28	333
825	0.0001781	176	246	25	316
826	0.0001722	140	212	24	284
827	0.0001676	162	212	26	262
828	0.0001845	203	255	28	307
829	0.0002222	38	139	29	240
830	0.0002146	121	202	24	283
831	0.0001997	46	155	15	264
832	0.0002338	77	158	21	239
833	0.0001848	159	206	25	253
834	0.0001722	188	243	27	298
835	0.0001712	123	189	27	255
836	0.0001894	247	287	29	327
837	0.0001742	150	219	24	288
838	0.0001722	185	257	21	329
839	0.0001765	139	223	25	307
840	0.000187	36	164	25	292
841	0.0001939	125	198	23	271
842	0.0001955	79	171	18	263
843	0.0001846	76	166	16	256
844	0.0002051	213	245	27	277
845	0.0001859	159	243	26	327
846	0.0001727	217	258	21	299
847	0.0001654	266	296	29	326
848	0.0002279	54	155	24	256
849	0.0002017	64	144	21	224
850	0.0001799	169	232	23	295
851	0.000242	70	177	20	284
852	0.0001855	45	154	21	263
853	0.000175	146	219	28	292
854	0.0001922	67	169	20	271
855	0.0001753	200	265	22	330
856	0.0002043	54	161	22	268
857	0.0001737	114	184	28	254
858	0.0001717	158	221	27	284
859	0.000177	227	272	26	317
860	0.0001764	179	256	29	333
861	0.0002293	143	197	15	251
862	0.0001895	25	139	17	253
863	0.0001896	168	228	26	288
864	0.0001772	201	257	25	313
865	0.000201	225	276	24	327
866	0.000172	190	251	25	312
867	0.0001741	229	291	29	353
868	0.0001833	153	221	23	289
869	0.0001766	111	186	24	261
870	0.0001877	122	203	23	284
871	0.0001765	185	243	25	301
872	0.0001761	85	163	24	241
873	0.0001865	109	192	28	275
874	0.0002454	34	160	26	286
875	0.0001836	151	230	27	309
876	0.0001894	114	190	28	266
877	0.0002168	78	190	25	302
878	0.0002001	8	127	19	246
879	0.0001938	16	131	18	246
880	0.0001992	109	187	29	265
881	0.0001835	99	179	26	259
882	0.0001845	188	243	23	298
883	0.0002395	174	229	28	284
884	0.0001827	21	112	11	203
885	0.0001687	353	394	29	435
886	0.0002052	5	107	23	209
887	0.0002372	63	175	24	287
888	0.0001798	156	225	25	294
889	0.0001992	18	137	22	256
890	0.0001824	146	214	25	282
891	0.0001647	293	333	27	373
892	0.0002008	306	341	29	376
893	0.0001805	110	184	27	258
894	0.0002845	147	204	28	261
895	0.0001699	173	235	21	297
896	0.0001683	326	363	29	400
897	0.0001818	99	194	23	289
898	0.0001948	113	197	27	281
899	0.0001853	237	282	29	327
900	0.0001749	171	236	21	301
901	0.0001759	300	340	27	380
902	0.0001833	147	203	23	259
903	0.0001783	80	159	22	238
904	0.000169	223	277	28	331
905	0.0001804	190	235	27	280
906	0.0002461	62	180	22	298
907	0.0001988	1	127	22	253
908	0.0001792	79	161	29	243
909	0.000188	116	209	25	302
910	0.0001916	38	164	21	290
911	0.0002259	59	157	16	255
912	0.0001662	220	276	26	332
913	0.0002033	161	232	23	303
914	0.0001929	65	193	29	321
915	0.0001721	163	213	25	263
916	0.0002204	35	144	20	253
917	0.0002056	9	132	22	255
918	0.0001624	249	292	25	335
919	0.0001669	205	257	27	309
920	0.0001968	6	116	21	226
921	0.0003047	2	146	18	290
922	0.0001998	135	227	25	319
923	0.0001855	142	213	23	284
924	0.0001947	42	158	23	274
925	0.0001666	163	215	22	267
926	0.0001657	212	267	24	322
927	0.0001997	109	165	22	221
928	0.0002265	3	148	25	293
929	0.0001821	94	194	18	294
930	0.0002196	38	162	25	286
931	0.0001896	87	187	29	287
932	0.0001639	265	307	28	349
933	0.0001903	85	172	18	259
934	0.0001623	210	258	28	306
935	0.0003953	201	253	29	305
936	0.0001696	148	209	25	270
937	0.0001838	71	160	20	249
938	0.000172	173	218	23	263
939	0.0001829	285	329	26	373
940	0.0002056	76	176	22	276
941	0.0001878	241	292	28	343
942	0.0001834	155	222	27	289
943	0.0001767	130	195	20	260
944	0.000206	173	236	29	299
945	0.0001615	259	306	28	353
946	0.0001685	152	207	25	262
947	0.0002023	196	227	25	258
948	0.0001959	112	188	29	264
949	0.000171	258	298	25	338
950	0.0001798	126	207	26	288
951	0.0001857	68	154	21	240
952	0.0001855	123	193	19	263
953	0.0001748	146	226	24	306
954	0.0001781	221	272	28	323
955	0.0002006	34	142	14	250
956	0.0001967	1	150	28	299
957	0.0002065	142	186	27	230
958	0.0001974	113	184	28	255
959	0.0001894	134	231	28	328
960	0.0001808	110	186	19	262
961	0.0001797	127	213	20	299
962	0.0001719	232	272	28	312
963	0.000176	192	259	24	326
964	0.0001736	211	280	29	349
965	0.0001636	252	297	28	342
966	0.0002098	21	142	21	263
967	0.0001816	96	199	26	302
968	0.0001926	97	186	25	275
969	0.0001792	124	201	26	278
970	0.0002018	0	137	27	274
971	0.0001857	75	184	17	293
972	0.0001843	83	172	15	261
973	0.0001833	41	143	26	245
974	0.0001924	156	229	28	302
975	0.0001682	179	224	25	269
976	0.000175	150	216	29	282
977	0.000182	400	426	27	452
978	0.000192	256	306	27	356
979	0.0001676	225	268	28	311
980	0.000224	57	169	18	281
981	0.0001845	14	133	16	252
982	0.0001815	68	166	22	264
983	0.0001869	137	211	26	285
984	0.0002422	41	153	18	265
985	0.0001745	151	218	27	285
986	0.000186	102	195	20	288
987	0.0002226	122	207	23	292
988	0.0001688	274	325	28	376
989	0.0001784	132	196	18	260
990	0.0002606	14	130	21	246
991	0.0002335	83	174	28	265
992	0.0001774	97	177	27	257
993	0.0001765	162	221	24	280
994	0.0002385	62	171	26	280
995	0.0002356	163	214	20	265
996	0.0001859	103	190	19	277
997	0.0001728	202	251	21	300
998	0.0001739	126	188	21	250
999	0.0001771	289	341	26	393
mean	0.000188287	137.236	213.152	24.11	289.068

## Sheet: GS_Opt
	time	SEq	Bal	Reg	Egal
0	0.0003682	101	186	16	271
1	0.0004071	251	302	28	353
2	0.0004154	38	137	16	234
3	0.0004469	102	171	22	240
4	0.0003589	232	280	29	328
5	0.000427	38	127	16	216
6	0.0003712	74	190	22	306
7	0.0003404	175	223	27	271
8	0.0003798	92	166	20	240
9	0.0003536	103	175	20	247
10	0.0003866	26	141	18	256
11	0.0003992	92	192	18	276
12	0.0003541	208	265	28	322
13	0.0003873	165	241	24	317
14	0.0003595	137	209	23	279
15	0.0004987	51	165	19	272
16	0.0003589	166	223	20	280
17	0.000391	124	210	24	296
18	0.0004163	34	159	23	284
19	0.0003781	37	151	19	265
20	0.0003953	73	169	22	265
21	0.0003633	106	182	23	258
22	0.0003597	84	166	22	248
23	0.0004082	122	193	24	264
24	0.0003824	16	137	16	258
25	0.0005533	56	157	24	258
26	0.0003766	112	192	23	269
27	0.0003677	171	218	21	265
28	0.0003789	14	125	25	236
29	0.0003723	279	313	29	347
30	0.0003879	155	219	26	283
31	0.0003641	235	290	24	345
32	0.0003868	57	174	21	291
33	0.0004172	23	135	15	247
34	0.0003613	107	199	23	291
35	0.0003784	124	223	27	303
36	0.0003814	93	170	22	247
37	0.0004385	102	179	25	256
38	0.0004048	20	124	17	228
39	0.0003971	79	164	23	249
40	0.0004119	143	218	22	293
41	0.0003797	140	224	24	308
42	0.0003902	60	146	29	232
43	0.0003947	129	205	24	281
44	0.000412	20	132	29	244
45	0.0003932	7	128	16	249
46	0.0003894	51	165	20	279
47	0.0003878	140	218	28	296
48	0.0004781	35	160	26	272
49	0.0003757	39	149	16	259
50	0.0004257	114	185	22	256
51	0.0004149	15	135	19	255
52	0.0003822	139	222	22	305
53	0.0004443	68	168	25	268
54	0.0004119	140	184	21	228
55	0.0003545	123	208	24	293
56	0.0004024	116	191	26	266
57	0.0006007	31	148	25	265
58	0.0003905	134	220	21	306
59	0.0003547	217	262	26	307
60	0.0003959	29	130	18	231
61	0.0003774	158	238	26	318
62	0.0004371	12	132	18	252
63	0.0003863	198	260	21	322
64	0.0003527	124	203	23	274
65	0.0003808	42	156	19	270
66	0.0003776	1	127	18	232
67	0.0003641	158	238	26	318
68	0.0003847	208	265	26	322
69	0.0003932	101	181	22	261
70	0.0004458	18	135	19	252
71	0.0003741	115	194	25	266
72	0.0004384	58	150	16	242
73	0.0003628	202	267	28	329
74	0.000395	154	230	26	306
75	0.0004142	41	155	23	269
76	0.0004194	62	168	18	248
77	0.0003515	120	196	23	272
78	0.0003667	148	237	24	326
79	0.0004179	37	142	25	245
80	0.0003843	140	220	22	300
81	0.0004675	72	168	23	254
82	0.0003931	210	282	27	354
83	0.0004008	127	216	28	305
84	0.0003723	5	114	16	223
85	0.000375	33	147	23	261
86	0.0003967	46	133	12	220
87	0.0004575	2	115	24	228
88	0.000401	162	243	25	324
89	0.0003826	107	182	23	257
90	0.0003645	163	236	19	309
91	0.000382	115	200	20	283
92	0.0003973	43	138	22	233
93	0.0003835	127	201	27	275
94	0.0003797	110	184	18	258
95	0.0003661	87	167	22	247
96	0.0003831	25	139	20	253
97	0.000392	12	159	27	306
98	0.0003798	81	178	28	275
99	0.0004036	21	143	21	265
100	0.0003811	35	150	25	265
101	0.0003641	196	251	23	300
102	0.0003769	29	133	23	237
103	0.0003814	47	152	22	257
104	0.0003752	189	245	25	301
105	0.0004078	17	159	26	301
106	0.0004138	11	149	18	264
107	0.0004482	24	156	19	259
108	0.0003929	21	137	16	252
109	0.0004077	71	164	27	257
110	0.000375	129	203	23	277
111	0.0003733	105	176	22	247
112	0.0004416	58	175	23	271
113	0.000383	127	211	18	295
114	0.0003677	210	252	23	294
115	0.0003795	115	172	25	229
116	0.0003973	10	128	20	246
117	0.0003822	20	128	16	236
118	0.0003745	103	198	22	293
119	0.0003597	149	209	22	269
120	0.000396	28	148	18	268
121	0.0003888	136	208	28	280
122	0.0004055	54	139	26	224
123	0.0003635	110	167	25	224
124	0.0003581	245	299	26	353
125	0.0003891	31	162	19	263
126	0.0004552	4	122	22	240
127	0.0003752	49	162	17	275
128	0.000394	119	194	16	269
129	0.0003865	60	165	21	270
130	0.0003899	36	135	17	234
131	0.0004308	58	149	18	240
132	0.0004046	55	142	19	229
133	0.0003933	88	159	21	230
134	0.0003658	123	199	20	274
135	0.0003836	211	260	25	309
136	0.0003606	240	285	25	330
137	0.0003607	149	224	26	299
138	0.0003677	114	190	28	266
139	0.0003558	132	209	18	286
140	0.0003988	126	206	28	286
141	0.0003737	168	227	23	284
142	0.0003971	182	244	29	306
143	0.0003861	34	176	22	318
144	0.000407	65	156	21	247
145	0.0003573	125	196	19	267
146	0.0003742	164	228	28	292
147	0.0003882	15	133	17	251
148	0.0003773	15	130	18	245
149	0.0004341	199	259	25	319
150	0.0003717	123	206	23	269
151	0.0004398	157	222	25	277
152	0.0003883	64	166	22	268
153	0.0003778	52	148	18	229
154	0.0003573	69	146	17	223
155	0.0003764	52	144	23	236
156	0.0003728	145	215	23	285
157	0.0003913	92	178	17	264
158	0.0004024	44	143	22	242
159	0.0003748	133	212	21	291
160	0.0004067	1	118	15	227
161	0.0003925	53	181	21	299
162	0.0004028	22	130	14	238
163	0.0003765	86	177	20	268
164	0.0004512	116	187	25	258
165	0.000353	128	197	27	266
166	0.0004356	11	131	26	251
167	0.0003916	34	141	21	248
168	0.0003903	113	191	19	269
169	0.0003936	62	151	15	240
170	0.0003824	55	138	21	221
171	0.0003663	35	146	17	257
172	0.0004445	75	169	17	237
173	0.0004022	117	196	20	275
174	0.0003565	169	242	27	315
175	0.0003644	178	234	19	290
176	0.0004231	0	132	17	264
177	0.0004501	49	157	16	265
178	0.0003917	117	199	17	281
179	0.0004003	39	152	23	265
180	0.0003536	247	289	26	331
181	0.0004118	25	136	16	247
182	0.0004023	24	142	17	260
183	0.0004321	144	233	28	304
184	0.0003737	90	186	17	282
185	0.0003968	132	203	21	274
186	0.0004266	81	194	22	307
187	0.0003742	139	197	23	255
188	0.0004017	28	155	17	282
189	0.0004021	126	217	15	292
190	0.0003661	96	190	18	284
191	0.0004325	29	128	16	226
192	0.00042	19	149	26	279
193	0.0003737	53	174	28	295
194	0.0003907	83	189	16	267
195	0.0003895	1	127	24	249
196	0.0003874	36	158	22	280
197	0.0003981	79	180	28	281
198	0.0004226	74	157	25	240
199	0.000444	136	214	23	292
200	0.0003719	80	178	22	276
201	0.0003946	60	175	18	278
202	0.0003709	89	191	24	293
203	0.0004231	87	182	25	277
204	0.0003818	34	135	16	236
205	0.0004094	73	168	19	263
206	0.0003897	73	161	22	233
207	0.0004364	103	168	15	233
208	0.0003903	31	149	20	267
209	0.0003775	53	153	17	238
210	0.0004137	193	265	28	337
211	0.0003567	125	210	25	295
212	0.0004405	89	185	24	281
213	0.0004423	89	169	24	249
214	0.0003854	94	173	20	252
215	0.0003746	70	173	19	274
216	0.0004133	30	148	21	266
217	0.000413	91	175	24	259
218	0.0003671	180	239	18	298
219	0.0003825	55	153	22	251
220	0.0004218	5	133	17	261
221	0.0003673	152	233	23	298
222	0.0003783	95	189	21	283
223	0.0003624	151	225	25	299
224	0.0003825	81	173	26	265
225	0.0004967	83	167	21	251
226	0.0003858	195	241	27	287
227	0.0003757	59	165	18	271
228	0.0003751	167	230	20	293
229	0.0003768	79	174	21	267
230	0.000412	30	150	21	270
231	0.0003603	174	226	29	278
232	0.0004258	16	151	22	286
233	0.0004352	93	192	26	283
234	0.0003873	116	178	27	240
235	0.0003407	142	212	23	282
236	0.0003909	58	168	23	278
237	0.0004084	136	224	24	312
238	0.0004072	139	207	27	275
239	0.0004278	232	280	26	322
240	0.0003943	8	133	21	258
241	0.0003932	83	181	25	279
242	0.0003959	116	205	26	294
243	0.000373	19	125	20	231
244	0.0004141	137	224	24	311
245	0.000429	55	156	18	257
246	0.0003879	51	183	16	311
247	0.0004008	64	165	25	266
248	0.0004091	112	194	24	276
249	0.0003758	84	189	26	294
250	0.0003474	116	177	24	238
251	0.000416	9	128	17	247
252	0.0003771	230	284	23	327
253	0.0004212	116	198	17	274
254	0.0003468	239	284	22	329
255	0.0004569	108	194	28	280
256	0.0003685	166	231	28	296
257	0.0003876	77	166	24	255
258	0.0003843	20	122	21	224
259	0.0003718	97	186	27	264
260	0.0003569	180	261	28	342
261	0.0004275	31	147	18	263
262	0.0003967	21	122	15	223
263	0.0003769	103	199	25	278
264	0.0003941	84	167	25	250
265	0.0004062	141	234	26	324
266	0.0003742	106	207	20	282
267	0.000412	76	166	23	256
268	0.0003746	65	151	14	237
269	0.0003924	91	173	17	255
270	0.0004116	125	209	24	293
271	0.0003759	121	214	24	307
272	0.0004048	124	193	23	262
273	0.000371	95	188	20	281
274	0.0003671	124	194	19	264
275	0.0004085	147	207	18	267
276	0.0003742	189	251	28	313
277	0.0004045	89	173	24	257
278	0.0004002	119	183	24	247
279	0.0004142	50	163	28	276
280	0.0003869	77	162	19	247
281	0.0004199	123	214	22	305
282	0.0003839	145	217	19	289
283	0.0003664	91	183	23	275
284	0.000378	219	268	25	317
285	0.0003593	249	301	28	353
286	0.0004218	9	122	14	235
287	0.0003814	52	170	15	288
288	0.000373	87	181	24	275
289	0.0004399	151	236	27	321
290	0.000429	106	201	23	296
291	0.0003698	124	197	25	270
292	0.0003668	160	224	22	288
293	0.0004142	90	188	25	286
294	0.00042	28	147	22	266
295	0.00038	147	211	21	275
296	0.0003966	192	253	27	314
297	0.0003818	174	244	25	314
298	0.0003831	3	135	22	267
299	0.0003764	124	209	18	294
300	0.0004067	88	183	20	274
301	0.0004051	55	158	21	261
302	0.0004033	114	199	22	284
303	0.0003668	169	226	29	283
304	0.0003971	170	226	25	282
305	0.0003887	22	110	13	198
306	0.0003704	56	153	20	250
307	0.000366	140	227	25	314
308	0.0004107	87	167	21	247
309	0.0003783	0	130	22	260
310	0.000379	26	145	18	252
311	0.0004058	180	239	20	294
312	0.0003869	60	162	20	264
313	0.0003795	65	174	19	259
314	0.0003569	103	169	19	235
315	0.0003407	183	224	26	265
316	0.0003966	16	126	16	233
317	0.0003565	76	155	27	234
318	0.0003758	91	173	21	255
319	0.0003876	30	144	18	258
320	0.0004019	17	127	18	237
321	0.000374	87	170	21	248
322	0.0003636	150	228	25	291
323	0.0003971	89	176	22	263
324	0.0003764	88	175	22	258
325	0.000395	133	206	19	279
326	0.0004175	40	160	19	270
327	0.0003766	118	190	23	262
328	0.0003963	96	212	22	328
329	0.0003808	104	185	20	266
330	0.0004429	49	158	18	246
331	0.0003926	137	217	23	297
332	0.0004012	25	135	14	245
333	0.0003983	54	140	20	226
334	0.0003745	149	216	25	283
335	0.0003782	134	204	27	274
336	0.0003784	202	259	26	316
337	0.0004014	73	158	21	232
338	0.00043	14	145	23	260
339	0.0003685	123	209	21	275
340	0.0003975	62	170	15	237
341	0.0003734	169	227	26	285
342	0.0003695	104	198	23	260
343	0.0004063	165	215	21	265
344	0.0005521	64	159	25	254
345	0.0003756	100	175	26	250
346	0.0003965	85	194	20	286
347	0.0003861	143	236	24	329
348	0.0004085	39	157	19	270
349	0.0004124	46	151	20	256
350	0.0003836	52	146	14	240
351	0.0003743	157	221	28	285
352	0.0004239	216	279	25	342
353	0.0003828	67	174	24	264
354	0.0004481	57	164	24	271
355	0.0004001	163	237	24	311
356	0.0004404	29	132	22	235
357	0.0003624	193	252	25	311
358	0.0003951	165	224	27	283
359	0.0004147	172	210	27	248
360	0.0004194	28	142	16	256
361	0.0003989	49	144	16	239
362	0.0004154	114	181	25	248
363	0.0003719	171	227	23	283
364	0.0003741	145	215	19	282
365	0.0003886	54	157	16	260
366	0.0003771	101	182	22	263
367	0.0003748	78	167	24	256
368	0.0003722	83	192	22	301
369	0.0003812	134	208	24	274
370	0.0003751	140	218	21	296
371	0.0003676	63	158	19	253
372	0.0004216	33	153	17	273
373	0.0003553	147	206	26	265
374	0.0004312	10	119	16	228
375	0.0003973	126	201	27	276
376	0.0003852	39	138	22	237
377	0.0004015	112	190	24	268
378	0.000413	60	164	14	268
379	0.0003857	63	145	20	227
380	0.0003844	121	203	25	285
381	0.0004398	64	186	26	308
382	0.0003851	229	286	25	343
383	0.0003803	90	179	21	268
384	0.0003779	118	199	26	280
385	0.0003886	118	205	23	292
386	0.0003677	54	143	26	232
387	0.0003755	129	190	22	251
388	0.0003871	102	175	20	248
389	0.0004023	80	178	20	276
390	0.0003869	162	227	18	292
391	0.0003542	141	191	20	241
392	0.0004553	56	152	21	248
393	0.0003936	89	164	22	239
394	0.0003779	61	144	22	227
395	0.0004752	23	148	17	273
396	0.0004559	29	137	18	245
397	0.0004219	86	167	17	248
398	0.0003777	71	183	20	274
399	0.0003966	142	213	24	284
400	0.000443	28	142	16	256
401	0.0003883	17	148	23	279
402	0.0003775	154	233	22	312
403	0.0003736	119	201	24	283
404	0.0004701	188	242	29	296
405	0.0003488	253	300	24	347
406	0.0003814	120	198	22	276
407	0.0003621	166	224	25	282
408	0.0003855	37	151	21	265
409	0.0003967	98	173	22	248
410	0.0004004	58	150	26	242
411	0.0003718	86	161	25	236
412	0.0003974	64	164	17	251
413	0.0004116	95	183	21	271
414	0.0003676	207	257	23	307
415	0.0004004	29	130	14	231
416	0.0004131	59	164	16	269
417	0.0003873	32	150	22	268
418	0.0004034	127	212	27	297
419	0.0003791	40	139	25	238
420	0.0003809	100	186	19	272
421	0.0003772	116	196	18	276
422	0.0003533	167	219	24	271
423	0.0004184	142	215	20	288
424	0.0004198	171	244	25	317
425	0.0003777	120	193	18	266
426	0.0004063	20	156	27	292
427	0.0004474	30	136	24	242
428	0.0004019	125	187	17	249
429	0.000359	122	208	26	294
430	0.0004464	183	244	25	305
431	0.0003547	105	188	21	269
432	0.000403	25	144	25	263
433	0.0004202	62	168	18	247
434	0.0004181	45	154	17	263
435	0.0003794	237	292	29	347
436	0.0004586	110	185	18	260
437	0.0003659	133	210	20	287
438	0.0004173	127	209	25	291
439	0.0003959	306	350	28	394
440	0.0004227	46	165	24	284
441	0.0003563	108	193	28	278
442	0.0003729	151	221	23	291
443	0.0003699	142	225	24	308
444	0.0004065	127	199	23	271
445	0.0004196	33	146	14	259
446	0.0003892	92	180	21	268
447	0.0003717	49	159	17	269
448	0.0003866	38	143	20	246
449	0.0005097	124	216	22	308
450	0.0003891	59	156	25	253
451	0.0004101	20	143	15	266
452	0.0003904	105	198	20	291
453	0.0003988	187	248	25	309
454	0.0003797	139	217	21	289
455	0.0003799	98	192	18	270
456	0.0003875	130	212	26	294
457	0.0004111	1	133	20	265
458	0.000398	44	173	26	298
459	0.0004048	56	167	24	278
460	0.0003584	152	224	26	296
461	0.0004134	27	141	24	254
462	0.0003582	116	194	23	272
463	0.0003737	138	201	20	264
464	0.0004068	63	156	19	249
465	0.0003959	66	164	29	262
466	0.0004097	4	137	23	270
467	0.000365	180	225	23	270
468	0.0003862	93	181	20	259
469	0.0004177	94	201	20	308
470	0.0004241	89	177	22	265
471	0.0003812	167	220	25	273
472	0.0004075	19	160	23	301
473	0.0003947	19	134	19	249
474	0.0003751	128	197	23	266
475	0.0004027	236	295	26	354
476	0.000458	4	124	20	244
477	0.0004023	87	187	19	287
478	0.0003519	156	218	25	280
479	0.0004025	5	123	26	241
480	0.0004473	62	158	16	254
481	0.0004413	185	245	22	305
482	0.0003939	50	159	19	268
483	0.0003572	197	263	17	318
484	0.0004468	76	177	21	269
485	0.0003846	47	158	23	269
486	0.0003858	140	211	20	282
487	0.0003711	123	203	25	283
488	0.0003689	83	155	28	225
489	0.0003591	277	324	25	371
490	0.0004333	28	159	21	290
491	0.0004081	117	202	23	287
492	0.0004238	126	210	19	294
493	0.0003961	159	224	22	289
494	0.0003901	141	201	20	261
495	0.0004162	48	155	17	262
496	0.0003745	222	291	24	339
497	0.0003913	81	168	23	255
498	0.0003809	61	158	20	255
499	0.0003681	107	185	27	263
500	0.0004157	29	119	20	209
501	0.0003798	32	121	21	210
502	0.0003997	114	205	24	285
503	0.0004401	6	138	23	270
504	0.0004056	109	192	26	273
505	0.0003707	124	207	24	290
506	0.0004196	29	148	19	267
507	0.0003773	180	251	24	319
508	0.0003938	111	211	21	311
509	0.0003743	82	180	14	255
510	0.0003799	83	179	19	275
511	0.0004224	40	154	21	268
512	0.0003665	186	262	26	338
513	0.0003929	137	221	22	305
514	0.0004045	127	189	22	251
515	0.0003769	141	219	22	297
516	0.0004142	96	167	28	238
517	0.0003621	199	257	27	315
518	0.0003929	48	147	24	246
519	0.0003806	205	265	25	325
520	0.0003607	132	206	25	267
521	0.0003852	111	184	18	257
522	0.0003982	24	127	17	230
523	0.0003889	55	145	20	227
524	0.0004023	33	132	22	231
525	0.0004029	107	180	23	253
526	0.000381	217	261	27	305
527	0.0004022	142	219	21	283
528	0.0004511	73	164	18	255
529	0.0003939	99	200	19	301
530	0.0004131	127	227	25	317
531	0.0003906	41	151	16	261
532	0.0003746	18	125	16	232
533	0.0003996	58	155	19	251
534	0.0004044	106	212	24	318
535	0.0004035	144	216	23	280
536	0.0003913	123	182	21	241
537	0.0004133	49	160	16	271
538	0.0003757	152	216	24	280
539	0.000399	76	160	21	244
540	0.0004561	142	213	21	284
541	0.000421	145	217	21	279
542	0.0003683	89	185	19	281
543	0.0003827	168	238	27	308
544	0.0003949	51	169	21	253
545	0.0003633	107	200	20	293
546	0.0004448	74	186	23	298
547	0.000358	145	220	26	292
548	0.0004405	20	135	18	250
549	0.0003835	71	161	26	251
550	0.0004281	78	155	19	232
551	0.0004161	46	163	26	280
552	0.0004029	148	219	28	290
553	0.0004113	54	154	23	254
554	0.0003903	164	221	23	278
555	0.0003637	164	238	21	312
556	0.0003861	91	182	24	273
557	0.0003819	5	125	20	245
558	0.0003766	68	185	20	302
559	0.0003986	15	122	13	229
560	0.0004481	3	146	26	289
561	0.0003697	65	156	19	247
562	0.0004635	107	193	24	279
563	0.0004178	65	164	15	263
564	0.000382	132	216	26	295
565	0.0003864	117	174	24	231
566	0.0003884	73	176	15	279
567	0.0003672	84	147	21	210
568	0.000461	41	144	14	247
569	0.0004164	30	164	22	298
570	0.0003765	40	152	20	264
571	0.0004072	67	156	18	245
572	0.00039	120	198	21	276
573	0.0004103	71	186	25	301
574	0.0003778	43	152	20	261
575	0.0003845	96	178	26	260
576	0.0004116	43	151	21	259
577	0.0003841	60	150	19	240
578	0.0003907	172	242	27	312
579	0.0004127	27	144	21	261
580	0.0004105	85	164	26	243
581	0.0003836	16	157	20	298
582	0.0004174	60	169	20	278
583	0.0004044	63	154	22	245
584	0.0004078	152	221	26	290
585	0.0003956	26	141	23	242
586	0.0003613	227	286	23	329
587	0.0004208	16	128	13	240
588	0.0003516	128	193	29	258
589	0.0004353	103	196	25	283
590	0.0003957	201	251	23	301
591	0.0003818	106	188	24	270
592	0.0004913	112	197	25	282
593	0.0004127	4	122	16	240
594	0.0004552	15	120	18	225
595	0.0004081	25	164	23	303
596	0.000421	164	251	26	318
597	0.0003987	84	176	19	268
598	0.0003935	48	155	26	262
599	0.0003864	51	163	24	270
600	0.0003896	98	182	21	266
601	0.0003638	44	167	21	276
602	0.000392	62	155	20	248
603	0.0003884	113	201	20	289
604	0.000384	94	163	18	232
605	0.0003958	20	142	17	264
606	0.0003785	116	208	27	300
607	0.0004584	172	250	23	328
608	0.0003721	107	196	27	278
609	0.0003698	71	180	22	289
610	0.0003765	49	157	16	241
611	0.0004414	77	169	16	258
612	0.000397	96	169	17	242
613	0.0003625	159	221	26	283
614	0.0004132	87	178	28	269
615	0.0004151	62	172	18	282
616	0.0004117	154	220	22	286
617	0.0004078	33	152	17	271
618	0.000377	60	163	19	254
619	0.0003479	94	157	17	220
620	0.0003997	90	194	25	298
621	0.0004639	67	163	23	259
622	0.0003611	132	193	26	254
623	0.0003404	186	241	26	296
624	0.0003581	139	190	24	241
625	0.0003545	121	180	20	239
626	0.0003623	158	228	22	298
627	0.0003702	102	193	19	284
628	0.0003497	96	190	19	284
629	0.0004184	43	132	16	221
630	0.000396	26	135	22	239
631	0.0004304	78	149	23	220
632	0.000372	16	147	20	278
633	0.000349	104	172	25	240
634	0.0004348	160	258	25	353
635	0.0003858	192	260	27	327
636	0.0003982	20	126	20	232
637	0.000365	77	173	17	269
638	0.0003656	134	196	25	258
639	0.000357	130	188	22	246
640	0.0003757	46	145	19	244
641	0.0004467	164	229	21	294
642	0.0003968	5	134	21	257
643	0.0003728	169	218	23	267
644	0.0003869	25	127	17	229
645	0.0003656	196	254	25	312
646	0.0003932	4	135	21	266
647	0.0003724	51	145	21	239
648	0.0004012	170	228	20	286
649	0.000383	58	166	19	274
650	0.0003913	159	235	19	297
651	0.0004311	41	167	20	293
652	0.0003748	65	140	19	215
653	0.000393	63	160	18	257
654	0.0003757	110	209	21	308
655	0.0003681	137	218	25	298
656	0.0003512	267	309	27	347
657	0.0004715	58	166	24	274
658	0.0003857	27	149	27	271
659	0.0004416	54	153	24	252
660	0.0003492	281	317	23	349
661	0.0003674	51	134	16	217
662	0.0004132	156	241	23	321
663	0.0003499	185	252	26	319
664	0.0004427	39	143	17	243
665	0.0003984	43	150	24	250
666	0.0004502	30	162	19	291
667	0.0003897	71	135	17	199
668	0.0004022	112	199	19	286
669	0.0004138	14	151	17	285
670	0.0004395	90	187	20	271
671	0.000365	134	210	20	286
672	0.0003993	94	177	18	241
673	0.0003701	80	175	20	270
674	0.0004028	34	136	19	238
675	0.000417	31	145	17	253
676	0.0004268	81	169	23	257
677	0.0003951	195	256	22	317
678	0.0003692	115	194	27	273
679	0.0003932	74	165	17	256
680	0.0003923	42	167	26	292
681	0.0004027	58	147	19	236
682	0.0003847	100	204	26	279
683	0.0003589	135	230	27	325
684	0.0003761	116	198	23	280
685	0.0003872	165	216	21	267
686	0.0004028	187	250	28	313
687	0.0003599	116	191	21	266
688	0.0003756	117	182	25	247
689	0.0004142	3	129	17	253
690	0.0004271	117	198	24	277
691	0.0003918	74	162	25	250
692	0.000372	206	266	25	321
693	0.0004279	57	179	21	285
694	0.000413	55	166	25	252
695	0.0003434	187	246	25	305
696	0.0003872	72	174	21	247
697	0.000381	72	183	22	294
698	0.0004037	102	209	22	316
699	0.0004275	227	291	26	355
700	0.0003806	167	225	25	279
701	0.0003697	25	131	23	233
702	0.0004167	57	149	25	241
703	0.0003649	213	255	25	297
704	0.0003652	168	244	24	320
705	0.0003723	97	209	20	294
706	0.0003829	195	258	25	321
707	0.0004048	12	140	19	256
708	0.0003622	144	236	21	304
709	0.0003604	126	176	22	226
710	0.0003506	158	226	26	294
711	0.0003808	216	281	28	346
712	0.0003685	74	169	19	264
713	0.0003629	208	256	25	304
714	0.0004305	133	215	27	297
715	0.000358	139	212	27	285
716	0.0003865	81	179	21	277
717	0.0004	80	173	17	266
718	0.0004062	95	205	19	315
719	0.0003921	67	197	23	327
720	0.0003816	54	163	20	272
721	0.0003574	72	165	24	258
722	0.0003838	14	120	19	226
723	0.0004175	121	209	24	297
724	0.0003978	10	129	19	248
725	0.0004018	108	181	23	254
726	0.0003999	50	153	15	256
727	0.000389	86	171	18	256
728	0.0003896	128	213	23	295
729	0.0003802	25	150	26	275
730	0.0004596	27	153	18	261
731	0.0003796	60	168	26	276
732	0.0003993	112	180	17	241
733	0.0003988	98	202	26	306
734	0.0003641	17	132	22	247
735	0.0003712	118	181	16	244
736	0.0003819	146	222	24	292
737	0.0004107	8	152	27	296
738	0.0004167	101	177	22	253
739	0.0003734	131	208	21	268
740	0.0004195	61	156	20	251
741	0.0003666	92	174	18	256
742	0.0003608	92	164	18	236
743	0.0003839	49	168	19	287
744	0.0004617	98	196	19	294
745	0.0003903	107	179	21	250
746	0.0003522	75	153	24	231
747	0.0003811	103	185	17	267
748	0.0004033	43	159	23	275
749	0.0003707	119	186	19	253
750	0.0004005	48	160	20	255
751	0.0003672	150	235	24	320
752	0.000364	76	158	23	240
753	0.0004138	45	153	19	261
754	0.0003686	118	190	23	256
755	0.0003809	23	125	18	227
756	0.0004722	168	226	22	284
757	0.0003957	123	209	21	295
758	0.0004204	132	214	22	296
759	0.0004456	3	156	20	309
760	0.0003747	50	151	21	252
761	0.0004371	6	118	18	230
762	0.0003743	154	212	16	270
763	0.0003967	38	159	23	263
764	0.000407	98	188	19	278
765	0.0003618	129	212	29	295
766	0.0004019	39	145	21	251
767	0.0003898	129	213	20	290
768	0.0003769	190	249	23	308
769	0.0003611	122	201	29	280
770	0.0004101	60	162	26	264
771	0.0004551	70	159	19	248
772	0.0003648	119	192	21	265
773	0.0003778	123	177	24	231
774	0.0003954	3	123	26	243
775	0.0003993	57	149	21	241
776	0.0003689	131	181	24	231
777	0.0003509	89	172	24	255
778	0.0003794	14	121	19	228
779	0.0003928	58	159	25	260
780	0.0004215	35	149	15	263
781	0.0004143	6	134	21	262
782	0.0003668	105	200	22	295
783	0.0003705	67	171	17	272
784	0.0003424	205	239	26	273
785	0.0003857	83	188	21	293
786	0.0004015	5	119	19	233
787	0.0003841	72	160	20	248
788	0.0003616	146	226	26	305
789	0.0004104	160	237	23	314
790	0.0004134	10	122	19	234
791	0.0003825	31	144	18	257
792	0.0003715	82	167	24	242
793	0.0003975	20	155	20	270
794	0.0003991	12	147	18	255
795	0.0004225	22	156	19	290
796	0.0004204	41	145	19	249
797	0.0003561	198	250	26	302
798	0.0003772	172	233	28	294
799	0.0004439	89	171	26	244
800	0.0004206	28	150	19	272
801	0.0003537	103	197	22	291
802	0.0004471	81	181	24	281
803	0.0003707	103	204	18	305
804	0.0003826	33	161	28	289
805	0.0003956	55	194	24	333
806	0.0004067	123	212	27	301
807	0.0004139	102	191	25	280
808	0.000393	92	140	17	188
809	0.00039	186	268	27	322
810	0.0004175	151	238	28	325
811	0.0003682	7	114	17	221
812	0.0003593	118	171	19	224
813	0.0004138	56	150	21	244
814	0.0003793	91	187	24	283
815	0.0003982	4	108	19	212
816	0.0004748	53	157	28	259
817	0.0003976	95	176	26	257
818	0.0004037	77	199	18	295
819	0.0003851	5	135	25	265
820	0.0003853	68	171	19	274
821	0.0003825	187	257	25	327
822	0.0003811	122	198	21	260
823	0.000421	113	173	21	233
824	0.0004294	91	176	19	261
825	0.0003883	176	246	25	316
826	0.0003958	13	156	23	284
827	0.0004024	57	125	21	193
828	0.0003861	203	255	27	307
829	0.0004295	38	139	28	240
830	0.0004273	26	157	24	283
831	0.0004232	46	155	15	264
832	0.0004552	62	158	21	239
833	0.0003838	97	186	22	253
834	0.000415	63	156	18	249
835	0.000376	123	186	23	249
836	0.0004604	52	173	23	294
837	0.0003466	150	219	24	288
838	0.000441	17	168	21	319
839	0.0004091	6	152	20	298
840	0.0003871	36	164	25	292
841	0.0003878	36	141	23	246
842	0.0004481	79	171	18	263
843	0.0003978	76	166	16	256
844	0.0003806	161	225	27	277
845	0.0003829	159	243	26	327
846	0.0003984	142	215	20	288
847	0.0003578	110	190	19	270
848	0.0004414	54	155	24	256
849	0.0003917	64	144	18	224
850	0.0003736	148	224	18	295
851	0.0004395	70	177	20	284
852	0.0004007	10	128	21	246
853	0.0003756	146	219	28	279
854	0.0004042	67	169	20	271
855	0.0003682	34	150	21	266
856	0.0003922	54	161	22	268
857	0.0003898	81	142	19	203
858	0.0003584	119	187	23	255
859	0.0003992	90	194	25	298
860	0.0003499	179	256	29	333
861	0.0004436	122	182	15	242
862	0.0003767	25	139	17	253
863	0.0003656	168	228	26	288
864	0.000355	201	257	25	313
865	0.0004039	33	155	24	277
866	0.0003885	78	187	25	296
867	0.0003732	229	291	27	353
868	0.0003878	153	221	23	289
869	0.0003838	111	186	24	261
870	0.0003572	122	203	23	284
871	0.0003711	17	139	16	261
872	0.0003997	45	137	22	229
873	0.0004018	109	192	18	275
874	0.0004311	34	160	25	237
875	0.0003709	82	169	14	256
876	0.0004156	114	190	28	266
877	0.0004116	78	190	25	297
878	0.0004182	8	127	19	246
879	0.0003844	16	131	18	246
880	0.0003826	109	187	28	265
881	0.0003834	34	140	26	246
882	0.0003918	158	212	23	266
883	0.0004664	1	141	28	281
884	0.0004411	21	112	11	203
885	0.0003659	220	271	25	322
886	0.0004009	5	107	23	209
887	0.0004523	63	175	24	287
888	0.0003887	114	196	25	278
889	0.0004082	18	137	22	256
890	0.0004013	146	213	25	278
891	0.0003457	200	257	22	314
892	0.000398	123	205	27	287
893	0.0003857	99	173	18	247
894	0.000515	56	143	19	230
895	0.0003888	11	132	18	253
896	0.0003647	10	108	15	206
897	0.0004008	65	174	21	283
898	0.0003789	113	197	27	281
899	0.0003722	115	188	27	261
900	0.0003719	83	177	21	271
901	0.0003977	15	135	22	255
902	0.0003886	147	203	23	259
903	0.0003687	49	133	19	217
904	0.0003668	165	243	28	321
905	0.000354	190	235	26	280
906	0.0004414	62	180	22	298
907	0.0003922	1	127	22	253
908	0.0003889	79	152	22	219
909	0.0003962	92	200	25	302
910	0.0004024	38	164	21	290
911	0.0004159	59	157	16	255
912	0.0003487	104	179	23	254
913	0.0004053	116	209	23	302
914	0.000439	65	193	21	321
915	0.0003746	102	187	25	263
916	0.0004348	35	144	20	253
917	0.000409	9	132	22	255
918	0.0003658	168	224	24	280
919	0.0003652	18	133	22	248
920	0.0004235	6	116	21	226
921	0.000502	2	146	18	290
922	0.0004581	91	197	25	303
923	0.0003776	142	213	23	284
924	0.0003996	15	139	23	263
925	0.0003869	107	202	22	267
926	0.000382	135	222	21	309
927	0.0004367	8	126	22	221
928	0.0004507	3	148	25	270
929	0.0003816	94	194	18	294
930	0.0004229	38	162	20	286
931	0.0004464	87	187	21	283
932	0.0003705	69	173	28	277
933	0.0003935	85	172	18	259
934	0.0003602	110	193	28	276
935	0.0005912	94	189	20	284
936	0.0004065	62	156	17	250
937	0.0003761	71	160	20	249
938	0.000375	117	204	20	263
939	0.0003725	241	295	21	349
940	0.0004396	76	176	22	276
941	0.000375	222	274	26	326
942	0.0003629	155	218	24	280
943	0.0003679	92	168	20	244
944	0.0004114	50	152	24	254
945	0.0003493	174	243	25	312
946	0.0004068	45	133	18	221
947	0.0003893	196	227	25	258
948	0.0003788	112	188	29	264
949	0.0003985	133	202	25	271
950	0.0003861	126	207	26	288
951	0.0003931	37	142	21	240
952	0.0004052	123	193	19	263
953	0.0003636	113	221	23	306
954	0.0003705	207	262	23	317
955	0.0003814	34	142	14	250
956	0.0003868	1	150	27	299
957	0.0004112	142	186	26	230
958	0.000408	92	175	26	255
959	0.0003887	134	231	27	328
960	0.0004162	93	161	19	229
961	0.000381	127	213	20	299
962	0.0004169	173	228	21	283
963	0.0003746	192	259	24	326
964	0.0003883	110	197	25	284
965	0.0003575	4	108	12	212
966	0.0003855	21	142	21	263
967	0.0004026	96	176	19	256
968	0.0003672	97	186	25	275
969	0.0003824	124	201	26	278
970	0.0003969	0	137	25	274
971	0.0003997	73	173	17	273
972	0.0003866	66	164	15	261
973	0.000362	41	143	26	245
974	0.0004055	143	203	19	263
975	0.0003699	161	224	21	269
976	0.0003707	101	185	20	269
977	0.0004205	56	175	27	294
978	0.0003901	27	138	20	249
979	0.0003313	225	268	27	311
980	0.0004397	57	169	18	281
981	0.0003859	14	133	16	252
982	0.0003967	68	166	22	264
983	0.0003986	137	211	24	285
984	0.0004658	41	153	18	265
985	0.0004066	132	207	27	282
986	0.0003938	11	134	18	257
987	0.0004206	53	150	17	247
988	0.0004196	28	163	28	298
989	0.000393	125	196	18	260
990	0.000496	14	130	21	214
991	0.0004645	3	133	28	263
992	0.0003901	97	177	25	257
993	0.0003644	162	221	24	280
994	0.0004145	62	171	26	270
995	0.0004398	32	131	14	230
996	0.0003729	103	190	19	277
997	0.000349	202	251	21	300
998	0.0003525	126	188	21	250
999	0.0003722	92	175	15	258
mean	0.000394862	94.03	184.05	21.923	271.933

## Sheet: PolyMin_SEq
	time	SEq	Bal	Reg	Egal
0	0.0031093	60	158	17	256
1	0.0036235	17	148	18	279
2	0.0031317	33	120	18	207
3	0.0031682	7	119	16	231
4	0.0039397	32	162	15	292
5	0.0031781	38	127	16	216
6	0.0033751	4	140	24	276
7	0.0034387	1	98	17	195
8	0.003449	115	169	18	223
9	0.0033817	14	123	16	232
10	0.0031744	26	141	18	256
11	0.0032754	79	175	18	271
12	0.0036135	14	141	18	268
13	0.0033988	86	192	20	298
14	0.0033841	11	131	21	251
15	0.0030152	51	165	19	279
16	0.0034385	55	150	19	245
17	0.0032663	21	139	27	257
18	0.003136	1	138	21	275
19	0.004795	37	151	19	265
20	0.0035277	47	161	20	275
21	0.0032316	5	128	17	251
22	0.0035208	20	122	18	224
23	0.0034139	52	160	18	268
24	0.0032009	16	137	16	258
25	0.0032157	3	119	13	235
26	0.0032128	21	129	16	237
27	0.0036686	5	114	14	223
28	0.0031916	14	125	25	236
29	0.003843	52	161	20	270
30	0.0039227	66	146	14	226
31	0.0041918	13	142	15	271
32	0.0033239	12	136	21	260
33	0.0029958	5	124	15	243
34	0.0033675	36	137	15	238
35	0.0035902	36	150	20	264
36	0.0032687	50	138	13	226
37	0.0032566	53	151	20	249
38	0.003148	6	116	15	226
39	0.003216	28	139	21	250
40	0.0036882	12	139	16	266
41	0.0033852	10	140	18	270
42	0.0036996	23	113	12	203
43	0.0036721	13	145	21	277
44	0.0028325	20	132	29	244
45	0.0030621	7	128	16	249
46	0.0034746	8	133	15	258
47	0.0035368	56	160	14	264
48	0.003088	48	160	26	272
49	0.0031917	32	144	16	256
50	0.0033783	18	121	15	224
51	0.0032263	22	131	17	240
52	0.003582	44	163	18	282
53	0.0032414	52	163	22	274
54	0.0035656	117	167	21	217
55	0.0032995	24	137	18	250
56	0.0032602	15	118	17	221
57	0.0032325	14	138	21	262
58	0.0033603	58	161	29	264
59	0.0036099	21	141	14	261
60	0.0031763	29	130	18	231
61	0.0034754	27	145	17	263
62	0.0032396	37	136	16	235
63	0.0036266	21	151	17	281
64	0.0033353	24	130	19	236
65	0.0034061	53	165	16	277
66	0.0031994	1	127	18	253
67	0.0041553	5	126	26	247
68	0.0035228	16	129	22	242
69	0.0033703	7	139	16	271
70	0.0027601	18	135	19	252
71	0.003181	52	148	27	244
72	0.0032584	4	116	20	228
73	0.0034845	5	131	17	257
74	0.0037055	59	172	25	285
75	0.0032195	17	140	23	263
76	0.0031827	103	172	18	241
77	0.0033592	94	179	19	264
78	0.0036631	89	194	16	299
79	0.0031125	8	121	21	234
80	0.0035986	40	161	20	282
81	0.0031554	36	143	22	250
82	0.0042049	41	173	14	305
83	0.0034125	28	148	23	268
84	0.0030732	5	114	16	223
85	0.003153	23	139	23	255
86	0.0027781	46	133	12	220
87	0.0031398	50	139	24	228
88	0.0034804	75	190	24	305
89	0.0032429	51	141	19	231
90	0.0037603	33	150	19	267
91	0.0042582	8	123	19	238
92	0.003113	24	127	22	230
93	0.003422	21	138	20	255
94	0.0035971	9	140	17	271
95	0.0033056	19	125	14	231
96	0.0031628	25	139	20	253
97	0.0033468	67	176	24	285
98	0.0032008	81	178	28	275
99	0.0030894	13	137	14	261
100	0.0032595	3	127	19	251
101	0.003392	38	129	17	220
102	0.0030964	44	131	17	218
103	0.0032758	1	126	22	251
104	0.0049925	69	161	18	253
105	0.0031989	74	194	22	314
106	0.0030764	11	149	18	287
107	0.0030613	42	145	16	248
108	0.003109	25	135	16	245
109	0.0033238	10	116	13	222
110	0.0035035	16	135	17	254
111	0.0031893	41	139	18	237
112	0.0031143	88	167	20	246
113	0.0033632	43	154	16	265
114	0.0035983	3	126	22	249
115	0.0031065	37	132	25	227
116	0.0034367	3	127	20	251
117	0.0032137	20	128	16	236
118	0.0034193	47	160	18	273
119	0.0036796	55	143	15	231
120	0.0031468	86	177	18	268
121	0.0033277	0	123	24	246
122	0.0031627	21	112	19	203
123	0.0033333	33	123	19	213
124	0.0035572	16	128	15	240
125	0.0030896	15	134	24	253
126	0.0031217	4	122	23	240
127	0.0033359	8	139	17	270
128	0.0034423	32	140	16	248
129	0.0031269	3	126	17	249
130	0.0030474	36	135	17	234
131	0.0029706	58	149	18	240
132	0.0030935	15	121	21	227
133	0.0034053	23	117	16	211
134	0.0031733	27	132	17	237
135	0.0036179	1	133	20	265
136	0.0036296	29	145	19	261
137	0.0035037	30	144	12	258
138	0.0032302	3	135	19	267
139	0.0032576	9	133	17	257
140	0.0033914	99	179	29	259
141	0.0035822	29	160	17	291
142	0.003677	119	200	21	281
143	0.0034037	30	168	25	306
144	0.0033392	33	131	17	229
145	0.003515	73	157	17	241
146	0.0041676	26	131	23	236
147	0.0032073	15	133	17	251
148	0.0031414	15	130	18	245
149	0.0036177	11	148	16	285
150	0.0033116	61	166	16	271
151	0.0035693	37	138	13	239
152	0.0032455	51	147	18	243
153	0.0030813	52	148	18	244
154	0.0031891	41	132	17	223
155	0.0030931	52	144	23	236
156	0.0033684	48	156	23	264
157	0.0031957	28	144	15	260
158	0.0029708	44	143	22	242
159	0.0035057	103	189	21	275
160	0.0030494	29	128	15	227
161	0.0035323	109	200	21	291
162	0.0029873	22	130	14	238
163	0.0031455	26	137	17	248
164	0.0037832	23	135	22	247
165	0.0032463	13	142	20	271
166	0.0030045	47	148	26	249
167	0.0031863	11	129	21	247
168	0.0033125	40	140	18	240
169	0.003412	62	151	15	240
170	0.0030891	58	136	17	214
171	0.0029982	9	130	17	251
172	0.0033354	29	135	12	241
173	0.0032695	31	139	16	247
174	0.003528	62	169	24	276
175	0.0035201	56	146	20	236
176	0.0032547	0	132	17	264
177	0.0030968	43	148	23	253
178	0.0032837	23	146	16	269
179	0.0032892	21	141	25	261
180	0.0036758	33	158	15	283
181	0.0037372	5	122	16	239
182	0.0032579	37	145	17	253
183	0.0034932	17	130	20	243
184	0.0035567	103	186	17	269
185	0.0036941	115	189	21	263
186	0.0034229	4	147	19	290
187	0.0034703	139	197	23	255
188	0.0032966	37	152	15	267
189	0.0034513	36	156	16	276
190	0.0031854	12	148	14	284
191	0.0031882	28	121	18	214
192	0.0030466	19	149	26	279
193	0.0031437	28	148	17	268
194	0.0033124	11	139	14	267
195	0.0030849	36	141	24	246
196	0.0031781	4	137	17	270
197	0.0034119	11	131	16	251
198	0.0032014	44	137	25	230
199	0.0035744	69	174	17	279
200	0.0032154	56	161	26	266
201	0.003263	86	178	25	270
202	0.0034347	64	178	24	292
203	0.0031525	41	163	18	285
204	0.0030942	34	135	16	236
205	0.003317	38	149	19	260
206	0.0032135	5	108	13	211
207	0.0032729	20	134	15	248
208	0.0031415	16	138	20	260
209	0.0032587	23	117	13	211
210	0.0035343	42	156	16	270
211	0.0033067	97	193	19	289
212	0.0032666	41	149	13	257
213	0.0031844	9	116	17	223
214	0.003132	94	173	28	252
215	0.0032078	30	139	16	248
216	0.0031251	63	146	13	229
217	0.0032935	16	120	24	224
218	0.0035616	21	142	18	263
219	0.0031186	55	153	22	251
220	0.0031978	5	133	17	261
221	0.0035745	20	145	16	270
222	0.0032923	16	136	26	256
223	0.0033596	5	146	17	287
224	0.0034505	24	138	21	252
225	0.0031122	10	131	19	252
226	0.0034207	50	154	20	258
227	0.0035297	41	152	18	263
228	0.0032755	21	155	24	289
229	0.0040797	5	136	20	267
230	0.0031414	59	160	21	261
231	0.0034832	22	136	17	250
232	0.0031692	32	158	17	284
233	0.0032505	10	142	21	274
234	0.0033	11	121	17	231
235	0.0033567	14	124	19	234
236	0.0030892	70	159	16	248
237	0.0036587	19	158	18	297
238	0.0034774	96	194	26	292
239	0.0035666	4	132	18	260
240	0.0032469	8	133	21	258
241	0.0031977	39	147	28	255
242	0.0034306	13	149	15	285
243	0.0030056	19	125	20	231
244	0.0037463	93	184	20	275
245	0.0032232	24	131	18	238
246	0.0031952	51	183	16	315
247	0.0034673	25	142	15	259
248	0.0034155	18	141	28	264
249	0.0033844	53	161	23	269
250	0.003323	116	177	24	238
251	0.0030153	9	128	17	247
252	0.0039206	39	158	22	277
253	0.0032497	13	139	16	265
254	0.0036223	40	149	21	258
255	0.0034715	6	148	21	290
256	0.0036779	9	149	15	289
257	0.0033708	12	127	24	242
258	0.0030251	20	122	21	224
259	0.0031897	2	114	14	226
260	0.0035773	59	180	16	301
261	0.0033289	4	131	18	258
262	0.0030497	21	122	15	223
263	0.0032307	25	133	22	241
264	0.0032397	22	125	25	228
265	0.0035844	6	142	17	278
266	0.0036098	106	207	20	308
267	0.0034679	46	144	23	242
268	0.0032272	65	151	14	237
269	0.0030099	91	173	17	255
270	0.0032137	40	147	19	254
271	0.0036133	52	168	15	284
272	0.0033005	55	155	22	255
273	0.0032771	20	141	19	262
274	0.0033837	18	137	18	256
275	0.003741	0	126	15	252
276	0.0034738	23	140	18	257
277	0.0033096	6	116	20	226
278	0.003155	13	115	15	217
279	0.0033266	50	163	28	276
280	0.0033494	39	129	12	219
281	0.0034934	28	160	23	292
282	0.0034235	36	144	16	252
283	0.0032939	66	164	18	262
284	0.0039053	19	131	15	243
285	0.0038503	15	158	14	301
286	0.0031802	6	120	14	234
287	0.0034011	33	157	15	281
288	0.0034535	45	156	20	267
289	0.0034265	72	182	21	292
290	0.0035544	44	163	18	282
291	0.0034721	0	134	19	268
292	0.0033355	39	135	19	231
293	0.0032729	27	140	14	253
294	0.003081	28	147	22	266
295	0.0038231	32	146	15	260
296	0.0035004	49	161	26	273
297	0.0036213	35	151	21	267
298	0.0032619	34	150	22	266
299	0.0034461	5	144	21	283
300	0.0035937	42	145	17	248
301	0.0031984	55	158	21	261
302	0.0032259	49	173	19	297
303	0.0035176	3	128	18	253
304	0.0032434	74	159	19	244
305	0.002976	22	110	13	198
306	0.0032784	8	113	15	218
307	0.0034438	53	160	17	267
308	0.003362	7	111	16	215
309	0.0032203	81	158	21	235
310	0.0034072	26	145	18	264
311	0.0033751	12	129	15	246
312	0.0033523	45	153	20	261
313	0.0032518	70	161	19	252
314	0.003041	60	140	19	220
315	0.0033155	10	113	15	216
316	0.0030987	64	141	13	218
317	0.0031853	32	124	20	216
318	0.0032283	18	123	15	228
319	0.0032461	9	136	18	263
320	0.0032172	51	139	18	227
321	0.0030818	13	121	22	229
322	0.0033558	19	130	25	241
323	0.003416	74	163	27	252
324	0.0030946	22	126	17	230
325	0.0032832	133	206	19	279
326	0.0032813	2	132	17	262
327	0.0035156	20	128	16	236
328	0.0034314	5	151	20	297
329	0.0034178	5	124	19	243
330	0.0029948	12	148	18	284
331	0.0033548	1	132	18	263
332	0.0033403	25	135	14	245
333	0.0032633	21	116	27	211
334	0.0034846	19	154	14	289
335	0.0036373	66	152	19	238
336	0.0039538	23	156	17	289
337	0.0032014	35	123	21	211
338	0.0033616	63	153	15	243
339	0.0034252	105	182	21	259
340	0.0031089	31	141	15	251
341	0.0035582	62	165	19	268
342	0.003187	17	132	15	247
343	0.0035428	9	113	13	217
344	0.0039354	64	159	25	254
345	0.0031615	17	122	16	227
346	0.0032288	48	167	19	286
347	0.0034396	57	182	22	307
348	0.0029755	58	164	19	270
349	0.0033126	23	140	19	257
350	0.0031666	52	146	14	240
351	0.0034694	57	140	17	223
352	0.0041237	12	127	14	242
353	0.003225	33	150	24	267
354	0.0031603	39	153	23	267
355	0.0035643	5	139	23	273
356	0.0032476	15	120	22	225
357	0.0037714	33	139	14	245
358	0.0034011	16	127	22	238
359	0.0038716	46	156	21	266
360	0.003059	20	134	16	248
361	0.0030926	49	144	16	239
362	0.0033406	39	135	15	231
363	0.0033504	2	128	23	254
364	0.0034199	28	133	17	238
365	0.0035557	36	145	13	254
366	0.0032633	22	127	16	232
367	0.0030433	27	131	18	235
368	0.0035854	17	141	22	265
369	0.0035478	72	162	24	252
370	0.00363	47	158	18	269
371	0.0031668	18	132	19	246
372	0.003223	33	153	17	273
373	0.003156	39	135	27	231
374	0.0031104	50	137	13	224
375	0.0033109	23	144	15	265
376	0.0031529	11	121	22	231
377	0.0033792	53	151	19	249
378	0.0033618	13	137	18	261
379	0.0032665	18	127	16	236
380	0.0033738	63	176	23	289
381	0.0032379	28	168	22	308
382	0.0039564	8	157	21	306
383	0.0032029	30	151	20	272
384	0.0034844	70	162	26	254
385	0.0032553	71	167	21	263
386	0.0032631	30	128	26	226
387	0.0035203	5	135	20	265
388	0.0033517	17	124	20	231
389	0.0032109	82	178	20	274
390	0.0039106	131	213	17	295
391	0.003218	47	133	13	219
392	0.0031765	45	143	24	241
393	0.0032009	18	124	25	230
394	0.0035303	18	127	15	236
395	0.0032277	9	140	14	271
396	0.0033055	29	137	18	245
397	0.0032453	46	145	16	244
398	0.0031819	106	190	20	274
399	0.0034155	47	158	25	269
400	0.0031302	28	142	16	256
401	0.0034867	66	167	23	268
402	0.0035584	37	172	23	307
403	0.0032994	60	164	24	268
404	0.0035001	34	143	18	252
405	0.0036973	11	153	19	295
406	0.0034374	59	153	22	247
407	0.0034993	39	150	23	261
408	0.0031957	12	128	21	244
409	0.0034056	18	130	20	242
410	0.003263	37	133	15	229
411	0.0032757	21	119	16	217
412	0.0031288	9	130	17	251
413	0.0032826	48	159	21	270
414	0.0037189	6	133	15	260
415	0.0030135	1	119	14	237
416	0.0034232	1	127	15	253
417	0.0029649	6	137	22	268
418	0.0033034	9	126	17	243
419	0.0031223	22	126	17	230
420	0.0032573	27	136	16	245
421	0.0034453	7	135	17	263
422	0.0034065	13	114	15	215
423	0.0036398	19	137	15	255
424	0.0037663	70	185	19	300
425	0.0034577	87	174	18	261
426	0.0030238	97	193	23	289
427	0.0030124	30	136	28	242
428	0.003362	37	144	13	251
429	0.0033743	30	137	24	244
430	0.0042483	36	151	23	266
431	0.0033423	32	131	15	230
432	0.0033129	40	138	14	236
433	0.0032555	62	168	18	274
434	0.0035767	45	154	17	263
435	0.0038302	42	154	20	266
436	0.0032367	20	129	23	238
437	0.0034256	81	158	18	235
438	0.0046416	44	172	19	300
439	0.0039589	10	163	19	316
440	0.003182	13	151	22	289
441	0.0033872	52	167	17	282
442	0.003469	28	151	18	274
443	0.003698	7	159	18	311
444	0.003343	78	157	18	236
445	0.0030239	7	133	14	259
446	0.0033338	33	135	15	237
447	0.0031365	84	165	17	246
448	0.0030757	18	129	20	240
449	0.0034078	46	169	16	292
450	0.0032098	41	144	25	247
451	0.0032694	37	150	15	263
452	0.0033628	54	164	17	274
453	0.0034892	6	124	23	242
454	0.0037654	3	127	13	251
455	0.0033348	62	157	17	252
456	0.0037216	13	134	14	255
457	0.0033378	1	133	20	265
458	0.0032915	3	145	26	287
459	0.0033812	1	134	24	267
460	0.0035998	16	127	16	238
461	0.0031044	78	158	17	238
462	0.003219	81	163	15	245
463	0.0035237	74	156	29	238
464	0.0031636	0	127	19	254
465	0.0032471	64	153	22	242
466	0.00328	38	151	15	264
467	0.003337	30	135	17	240
468	0.0031778	10	128	22	246
469	0.0033129	48	160	21	272
470	0.0032296	35	141	16	247
471	0.0036856	2	128	20	254
472	0.0033812	64	174	18	284
473	0.0033004	36	139	17	242
474	0.0034323	36	139	22	242
475	0.003945	28	155	24	282
476	0.003	4	124	22	244
477	0.0033593	31	156	16	281
478	0.0033134	34	143	29	252
479	0.0030421	55	138	26	221
480	0.0033496	28	143	15	258
481	0.0035298	6	129	13	252
482	0.0031229	50	159	19	268
483	0.0038145	88	185	17	282
484	0.0031526	13	128	16	243
485	0.0030737	47	158	23	269
486	0.0034178	50	141	12	232
487	0.0034101	47	157	17	267
488	0.0030943	24	116	23	208
489	0.0037807	36	153	21	270
490	0.0034074	44	163	21	282
491	0.0031954	17	137	23	257
492	0.0034495	81	172	15	263
493	0.0035345	51	152	18	253
494	0.0032769	17	127	17	237
495	0.003249	25	142	26	259
496	0.0040595	16	150	17	284
497	0.0033598	57	144	15	231
498	0.0032619	22	138	17	254
499	0.0034954	13	135	27	257
500	0.0032625	29	119	20	209
501	0.0033863	3	94	14	185
502	0.0032497	7	141	22	275
503	0.0030781	30	149	23	268
504	0.0032958	5	133	19	261
505	0.0037145	51	155	20	259
506	0.0031699	29	148	19	267
507	0.003348	0	142	18	284
508	0.0034254	102	200	18	298
509	0.0031624	21	125	17	229
510	0.0032774	30	159	18	288
511	0.0030035	6	131	22	256
512	0.0037033	60	183	25	306
513	0.0033618	27	155	18	283
514	0.0037955	54	142	19	230
515	0.0035912	42	163	17	284
516	0.0031206	3	120	19	237
517	0.0035607	0	115	13	230
518	0.003314	48	147	24	246
519	0.0033533	41	160	25	279
520	0.0033975	4	117	17	230
521	0.0034985	8	124	15	240
522	0.0032844	24	127	17	230
523	0.0031284	22	123	27	224
524	0.0034661	4	117	15	230
525	0.003471	97	156	15	215
526	0.0037101	4	109	19	214
527	0.0033762	17	136	17	255
528	0.0029513	73	164	18	255
529	0.0038181	19	151	20	283
530	0.0033215	11	148	17	285
531	0.0033375	41	151	16	261
532	0.0030508	18	125	16	232
533	0.0033253	46	141	19	236
534	0.0035592	35	148	19	261
535	0.0033533	79	165	18	251
536	0.003436	3	129	19	255
537	0.0031038	24	142	16	260
538	0.0033931	32	131	26	230
539	0.0033646	30	126	17	222
540	0.003353	9	124	13	239
541	0.0034131	1	120	19	239
542	0.003453	52	153	24	254
543	0.0033334	5	129	21	253
544	0.0031373	41	139	21	237
545	0.0036117	4	142	13	280
546	0.0034192	54	172	20	290
547	0.0033074	20	127	16	234
548	0.0030194	20	135	18	250
549	0.0031493	3	118	16	233
550	0.0031076	41	129	18	217
551	0.0027118	46	163	26	280
552	0.0033126	34	151	17	268
553	0.003139	11	123	18	235
554	0.003452	96	170	15	244
555	0.0039296	13	145	24	277
556	0.0034393	29	146	24	263
557	0.0031189	33	128	19	223
558	0.0035689	119	210	18	301
559	0.0032468	15	122	13	229
560	0.0032163	3	146	26	289
561	0.003239	45	154	18	263
562	0.0033086	33	132	14	231
563	0.0032704	65	164	15	263
564	0.0032533	42	150	28	258
565	0.0033605	60	130	19	200
566	0.0035453	10	135	13	260
567	0.0030491	23	114	15	205
568	0.0031105	9	127	14	245
569	0.0032648	30	164	22	298
570	0.0032979	1	130	17	259
571	0.0034459	23	121	16	219
572	0.0033389	34	152	15	270
573	0.0031633	99	192	22	285
574	0.0033019	43	152	20	261
575	0.0036528	13	130	19	247
576	0.0031975	9	136	20	263
577	0.0032318	79	155	17	231
578	0.0036617	5	133	21	261
579	0.0031771	8	134	20	260
580	0.0034688	75	147	18	219
581	0.0032075	39	168	20	297
582	0.003282	17	138	18	259
583	0.0032787	19	133	17	247
584	0.0035298	7	129	16	251
585	0.0030946	13	126	27	239
586	0.0037278	58	175	20	292
587	0.0031846	16	128	13	240
588	0.0034737	33	133	26	233
589	0.0033915	11	128	23	245
590	0.0034248	50	142	20	234
591	0.0032964	44	140	21	236
592	0.0034911	20	136	24	252
593	0.0032019	4	122	16	240
594	0.0029474	55	139	15	223
595	0.0032908	10	154	25	298
596	0.0035917	115	189	18	263
597	0.0030576	27	151	16	275
598	0.003088	48	155	26	262
599	0.003161	44	146	24	248
600	0.0033807	45	148	21	251
601	0.0033573	184	230	21	276
602	0.003162	40	142	20	244
603	0.0034888	57	169	24	281
604	0.0031812	48	131	18	214
605	0.0032656	15	128	17	241
606	0.0033673	12	141	19	270
607	0.0034533	49	158	18	267
608	0.0032083	33	152	20	271
609	0.0031779	16	139	22	262
610	0.0037803	41	136	16	231
611	0.0033211	21	130	15	239
612	0.0033524	39	131	14	223
613	0.0034683	26	153	16	280
614	0.0033908	53	147	19	241
615	0.0030546	31	154	23	277
616	0.0032924	19	136	13	253
617	0.0031659	2	128	17	254
618	0.0033761	96	175	19	254
619	0.0035203	37	122	17	207
620	0.0033598	10	138	17	266
621	0.0031843	67	163	23	259
622	0.0033802	103	169	22	235
623	0.0037119	30	128	19	226
624	0.0033731	86	169	20	252
625	0.0035162	39	123	19	207
626	0.0034263	35	159	20	283
627	0.003596	1	124	16	247
628	0.003251	9	124	19	239
629	0.0031329	43	132	16	221
630	0.0031575	18	126	24	234
631	0.0031628	10	113	19	216
632	0.0035788	69	172	20	275
633	0.0035271	13	120	14	227
634	0.0035063	29	165	20	301
635	0.0036564	60	176	16	292
636	0.003009	20	126	20	232
637	0.0033034	77	173	17	269
638	0.0032828	65	146	18	227
639	0.0042719	66	142	21	218
640	0.0032555	16	123	17	230
641	0.0036742	107	190	15	273
642	0.0032123	73	159	18	245
643	0.0034726	12	119	22	226
644	0.0040489	25	127	17	229
645	0.003524	44	142	23	240
646	0.003251	4	135	21	266
647	0.0031984	12	123	21	234
648	0.0035287	28	125	13	222
649	0.0033304	50	157	18	264
650	0.003633	26	165	16	304
651	0.0033242	41	167	20	293
652	0.0034524	50	150	18	250
653	0.003207	21	131	16	241
654	0.0037453	49	165	25	281
655	0.003542	88	187	17	286
656	0.0036817	25	143	18	261
657	0.0032266	10	146	22	282
658	0.0038489	27	149	27	271
659	0.0032168	14	133	17	252
660	0.0041009	30	154	22	278
661	0.0032622	49	127	16	205
662	0.003606	72	180	15	288
663	0.003432	17	148	17	279
664	0.0031649	44	135	15	226
665	0.0033144	56	138	23	220
666	0.0031143	10	149	23	288
667	0.002953	15	104	16	193
668	0.0032465	8	139	14	270
669	0.0030848	14	151	17	288
670	0.0033064	25	145	19	265
671	0.0034951	49	150	18	251
672	0.0032069	113	177	18	241
673	0.0034693	16	143	16	270
674	0.0033028	99	161	19	223
675	0.003109	9	129	17	249
676	0.0031831	25	129	20	233
677	0.003489	80	169	19	258
678	0.0038242	47	160	18	273
679	0.0033246	38	142	17	246
680	0.0032663	11	137	16	263
681	0.0035006	23	124	19	225
682	0.0032461	47	159	18	271
683	0.0033615	16	140	16	264
684	0.0033876	15	126	12	237
685	0.003461	7	114	15	221
686	0.0035999	10	136	15	262
687	0.0034792	48	139	24	230
688	0.0035461	55	167	22	279
689	0.0031011	96	166	16	236
690	0.0033887	2	125	20	248
691	0.0032077	0	122	25	244
692	0.0037255	37	144	18	251
693	0.0032776	44	154	19	264
694	0.0030231	55	166	25	277
695	0.0034689	47	154	16	261
696	0.0031884	88	167	21	246
697	0.0032814	34	169	19	304
698	0.0035301	9	144	22	279
699	0.0039027	56	176	16	296
700	0.0032658	10	120	16	230
701	0.0031549	91	157	23	223
702	0.0033976	74	155	22	236
703	0.0036324	19	130	15	241
704	0.0034999	47	162	23	277
705	0.003499	74	180	20	286
706	0.0035994	38	140	19	242
707	0.0031758	24	133	17	242
708	0.003379	73	176	19	279
709	0.0035831	43	127	28	211
710	0.0037534	16	138	28	260
711	0.0036978	40	162	23	284
712	0.0033799	9	133	15	257
713	0.0036183	21	143	17	265
714	0.0036419	27	153	22	279
715	0.0035287	26	149	18	272
716	0.003267	61	166	21	271
717	0.0034658	22	136	17	250
718	0.0036516	95	205	19	315
719	0.003364	50	173	18	296
720	0.0033285	17	151	20	285
721	0.0032739	52	136	18	220
722	0.0033391	14	120	19	226
723	0.0035553	43	151	19	259
724	0.0034255	10	129	19	248
725	0.0032895	22	133	16	244
726	0.0032725	50	153	15	256
727	0.0031801	7	121	17	235
728	0.0038275	92	174	17	256
729	0.0033779	17	140	15	263
730	0.0031361	99	180	18	261
731	0.0033303	45	140	15	235
732	0.003372	32	120	17	208
733	0.0033963	9	138	14	267
734	0.003468	52	147	22	242
735	0.0038436	53	146	16	239
736	0.0035102	95	171	16	247
737	0.0034031	8	152	27	296
738	0.0031307	52	145	22	238
739	0.0035057	74	166	15	258
740	0.0034551	9	123	20	237
741	0.0032892	74	158	16	242
742	0.00321	49	140	19	231
743	0.0035833	27	158	17	289
744	0.0032989	9	155	19	301
745	0.0033441	20	122	24	224
746	0.0034512	13	115	19	217
747	0.0034986	56	146	19	236
748	0.0032283	11	136	22	261
749	0.0033992	38	141	13	244
750	0.0032371	18	134	19	250
751	0.0037842	62	171	18	280
752	0.0032074	42	140	23	238
753	0.003099	45	153	19	261
754	0.0037163	7	122	17	237
755	0.0032651	52	139	18	226
756	0.0036446	77	175	14	273
757	0.0034958	84	175	25	266
758	0.003513	4	150	15	296
759	0.0032782	3	156	20	309
760	0.0031815	13	130	20	247
761	0.0029932	6	118	18	230
762	0.0034716	61	154	17	247
763	0.0032343	116	187	23	258
764	0.0031594	35	151	19	267
765	0.0034683	21	142	23	263
766	0.0036418	49	145	15	241
767	0.003252	30	144	18	258
768	0.0034917	33	149	16	265
769	0.0034198	14	134	20	254
770	0.0033472	60	162	26	264
771	0.0033142	16	129	21	242
772	0.0032585	33	119	16	205
773	0.0035247	46	129	18	212
774	0.0031374	64	152	20	240
775	0.0032443	32	135	21	238
776	0.0036005	43	137	19	231
777	0.0037735	66	160	24	254
778	0.0030132	49	135	19	221
779	0.003269	17	125	14	233
780	0.0033023	39	148	21	257
781	0.0033032	39	142	18	245
782	0.0033934	22	151	24	280
783	0.0031284	9	123	19	237
784	0.0036201	16	129	17	242
785	0.003634	48	183	21	318
786	0.0030946	29	126	19	223
787	0.0032921	2	117	17	232
788	0.0042997	24	135	19	246
789	0.003474	3	127	17	251
790	0.0034266	73	145	17	217
791	0.0032836	31	144	18	257
792	0.0033457	56	148	16	240
793	0.0032046	53	160	20	267
794	0.0030516	39	147	18	255
795	0.0031961	22	156	19	290
796	0.0031389	41	145	19	249
797	0.0037825	50	167	22	284
798	0.0034322	33	142	17	251
799	0.0032692	13	125	21	237
800	0.0030965	67	167	19	267
801	0.003332	15	148	18	281
802	0.002827	81	181	24	281
803	0.0035456	35	166	18	297
804	0.0033971	89	178	24	267
805	0.003185	53	172	21	291
806	0.003453	25	143	19	261
807	0.0031629	21	141	19	261
808	0.0032091	34	107	21	180
809	0.0036166	115	194	17	273
810	0.0032862	36	158	28	280
811	0.0029795	57	135	16	213
812	0.0033675	24	115	14	206
813	0.0033631	56	150	21	244
814	0.0032865	32	143	16	254
815	0.0031808	4	108	19	212
816	0.0030364	53	157	28	261
817	0.0037666	73	160	23	247
818	0.0031415	77	199	18	321
819	0.0030776	64	161	20	258
820	0.0033553	23	140	19	257
821	0.0036281	64	181	19	298
822	0.0034483	118	171	19	224
823	0.0033915	12	124	16	236
824	0.0037536	1	124	14	247
825	0.0035616	25	153	16	281
826	0.0032898	95	186	23	277
827	0.0033414	8	97	26	186
828	0.0034996	25	130	20	235
829	0.0030993	32	136	26	240
830	0.0030294	121	202	24	283
831	0.0031405	34	141	19	248
832	0.0031621	45	141	19	237
833	0.0035238	39	136	13	233
834	0.003253	11	126	18	241
835	0.0032471	8	113	12	218
836	0.0031715	97	191	23	285
837	0.0035941	12	126	18	240
838	0.0033751	119	214	20	309
839	0.0031203	6	152	20	298
840	0.0032367	13	147	24	281
841	0.0032458	13	124	15	235
842	0.0034226	51	151	15	251
843	0.0032231	76	166	16	256
844	0.0034657	7	123	17	239
845	0.0036049	22	153	25	284
846	0.0036432	72	165	14	258
847	0.0035756	23	122	18	221
848	0.0030265	6	118	16	230
849	0.0032688	12	116	21	220
850	0.0039746	22	142	18	262
851	0.0034533	70	177	20	284
852	0.0030672	10	128	21	246
853	0.0034248	93	171	28	249
854	0.003397	5	137	20	269
855	0.0034795	5	134	21	263
856	0.0033137	3	127	19	251
857	0.0032367	42	117	19	192
858	0.0033528	36	147	23	258
859	0.0033745	64	158	25	252
860	0.003779	18	133	19	248
861	0.0032317	74	146	14	218
862	0.0036517	25	139	17	253
863	0.0036184	48	147	23	246
864	0.0035584	59	171	17	283
865	0.0032737	23	131	16	239
866	0.0033077	4	124	15	244
867	0.0037541	134	214	22	294
868	0.003436	12	123	17	234
869	0.0033601	18	125	15	232
870	0.0037155	65	178	18	291
871	0.0032645	1	126	16	251
872	0.0032753	45	137	22	229
873	0.003307	26	141	13	256
874	0.0032808	131	184	25	237
875	0.0033722	31	137	21	243
876	0.0033523	40	149	15	258
877	0.0031928	78	190	25	302
878	0.0033864	8	127	19	246
879	0.0031242	16	131	18	246
880	0.003405	1	126	19	251
881	0.0030407	8	123	26	238
882	0.0032811	46	147	16	248
883	0.0035234	44	163	27	282
884	0.0031003	5	102	12	199
885	0.0040983	0	136	12	272
886	0.0031845	5	107	23	209
887	0.0034269	36	172	22	308
888	0.0031824	38	152	20	266
889	0.003315	74	153	14	232
890	0.0033495	16	123	16	230
891	0.0037503	95	188	17	281
892	0.0036649	26	140	17	254
893	0.0032494	7	116	16	225
894	0.0033691	47	135	15	223
895	0.0035872	11	132	18	253
896	0.0032689	10	106	15	202
897	0.0033268	0	129	21	258
898	0.0035618	63	172	20	281
899	0.003322	27	144	18	261
900	0.0032143	50	155	15	260
901	0.0034	35	148	22	261
902	0.0034491	37	134	17	231
903	0.0032919	11	116	17	221
904	0.0034652	8	134	24	260
905	0.0035228	25	137	23	249
906	0.0032486	52	153	21	254
907	0.0032695	1	127	22	253
908	0.0031924	31	118	20	205
909	0.0032516	11	145	21	279
910	0.0031768	38	164	21	290
911	0.0033259	24	138	15	252
912	0.0034367	69	154	20	239
913	0.0032965	42	154	16	266
914	0.0031878	73	183	20	293
915	0.003319	3	125	16	247
916	0.0030531	35	144	20	253
917	0.0031315	9	132	22	255
918	0.0037561	17	141	25	265
919	0.0032565	63	144	23	225
920	0.0032408	6	116	21	226
921	0.0033913	2	146	18	290
922	0.0034156	22	151	17	280
923	0.0034616	42	155	16	268
924	0.0030773	9	137	23	265
925	0.0033735	33	137	15	241
926	0.0033988	46	147	17	248
927	0.0033052	109	165	22	221
928	0.0031339	71	177	24	283
929	0.0033827	38	167	17	296
930	0.0033969	67	163	16	259
931	0.0031864	32	149	18	266
932	0.003255	10	143	18	276
933	0.0033511	46	148	13	250
934	0.0033094	7	123	21	239
935	0.0034984	94	189	20	284
936	0.0031986	13	117	16	221
937	0.0032059	32	146	17	260
938	0.0034743	127	194	20	261
939	0.0038742	33	162	19	291
940	0.0032784	38	156	20	274
941	0.0040419	88	189	19	290
942	0.003288	39	134	20	229
943	0.0032762	34	124	14	214
944	0.0033382	60	160	23	260
945	0.0038454	12	135	21	258
946	0.0032335	29	123	18	217
947	0.0037021	49	154	18	259
948	0.0032681	1	120	19	239
949	0.0036181	40	135	16	230
950	0.0035085	2	135	19	268
951	0.0033329	44	135	18	226
952	0.003364	13	132	15	251
953	0.0035129	86	201	19	316
954	0.0035594	26	146	23	266
955	0.0032219	34	142	14	250
956	0.0032014	27	164	25	301
957	0.0032954	84	141	17	198
958	0.0036418	9	119	16	229
959	0.0037253	23	164	23	305
960	0.0032414	39	127	14	215
961	0.0035899	92	189	20	286
962	0.0035555	11	117	16	223
963	0.0036485	51	170	15	289
964	0.00365	15	151	19	287
965	0.0032069	4	108	12	212
966	0.0031357	21	142	21	263
967	0.0033212	86	171	16	256
968	0.003513	43	149	16	255
969	0.0035529	20	132	16	244
970	0.00316	30	148	19	266
971	0.0031434	21	143	16	265
972	0.0031352	55	151	15	247
973	0.0031595	7	128	17	249
974	0.0034323	33	144	16	255
975	0.0034797	36	132	21	228
976	0.0034633	54	153	20	252
977	0.0034546	56	175	28	294
978	0.0033856	27	138	20	249
979	0.0035692	6	122	18	238
980	0.0033536	18	151	18	284
981	0.0032984	14	133	16	252
982	0.0035599	19	128	17	237
983	0.003702	13	133	23	253
984	0.0035304	41	153	18	265
985	0.0034077	12	149	24	286
986	0.0031908	11	134	18	257
987	0.0033949	20	143	17	266
988	0.0033663	6	146	22	286
989	0.0032246	13	127	15	241
990	0.0030499	14	130	21	246
991	0.0030633	3	133	28	263
992	0.0031739	21	137	20	253
993	0.0033116	51	162	18	273
994	0.0031687	31	140	22	249
995	0.0032323	57	136	13	215
996	0.003459	4	139	19	274
997	0.0035929	16	139	17	262
998	0.0034069	6	108	15	210
999	0.0033646	23	142	15	261
mean	0.00336798	35.519	144.676	18.87	253.833

## Sheet: PolyMin_Bal
	time	SEq	Bal	Reg	Egal
0	0.0034202	60	158	17	256
1	0.0039445	17	148	18	279
2	0.0035642	33	120	18	207
3	0.0042759	7	119	16	231
4	0.0038843	32	162	15	292
5	0.0030729	38	127	16	216
6	0.0032094	4	140	24	276
7	0.0032643	1	98	17	195
8	0.0031608	115	169	18	223
9	0.0032869	14	123	16	232
10	0.0029949	26	141	18	256
11	0.0033145	79	175	18	271
12	0.0034821	14	141	18	268
13	0.0035062	94	184	22	274
14	0.0035099	11	131	21	251
15	0.0038789	51	165	19	279
16	0.0033516	55	150	19	245
17	0.0032978	21	139	27	257
18	0.0031964	1	138	21	275
19	0.0031329	37	151	19	265
20	0.0032447	47	161	20	275
21	0.003222	5	128	17	251
22	0.0034951	20	122	18	224
23	0.0031956	52	160	18	268
24	0.0031496	16	137	16	258
25	0.0030892	3	119	13	235
26	0.0032594	21	129	16	237
27	0.0033422	5	114	14	223
28	0.0034786	14	125	25	236
29	0.0036355	52	161	20	270
30	0.003427	66	146	14	226
31	0.0039945	13	142	15	271
32	0.003319	12	136	21	260
33	0.003079	5	124	15	243
34	0.0032863	36	137	15	238
35	0.0033134	36	150	20	264
36	0.0034229	50	138	13	226
37	0.0035386	53	151	20	249
38	0.0033904	6	116	15	226
39	0.0032445	28	139	21	250
40	0.0034068	12	139	16	266
41	0.0033867	11	134	18	257
42	0.0034664	23	113	12	203
43	0.0038648	13	145	21	277
44	0.0036571	20	132	29	244
45	0.0030552	7	128	16	249
46	0.0033365	8	133	15	258
47	0.0036756	56	160	14	264
48	0.0031118	48	160	26	272
49	0.0033795	32	144	16	256
50	0.0034038	18	121	15	224
51	0.0032995	22	131	17	240
52	0.003488	44	163	18	282
53	0.0032429	52	163	22	274
54	0.003697	117	167	21	217
55	0.0032829	24	137	18	250
56	0.0033873	15	118	17	221
57	0.0031185	14	138	21	262
58	0.0033056	58	161	29	264
59	0.0037296	35	136	19	237
60	0.0029323	29	130	18	231
61	0.0039949	27	145	17	263
62	0.003291	37	136	16	235
63	0.003621	23	149	17	275
64	0.0035471	24	130	19	236
65	0.0034811	53	165	16	277
66	0.0031335	1	127	18	253
67	0.0035102	5	126	26	247
68	0.0036229	16	129	22	242
69	0.0032537	7	139	16	271
70	0.0027444	18	135	19	252
71	0.0031887	52	148	27	244
72	0.0034551	4	116	20	228
73	0.0036451	5	131	17	257
74	0.0037003	59	172	25	285
75	0.0031409	17	140	23	263
76	0.0032828	103	172	18	241
77	0.0037923	94	179	19	264
78	0.0036557	89	194	16	299
79	0.0031425	8	121	21	234
80	0.0035159	40	161	20	282
81	0.0031166	36	143	22	250
82	0.0037384	41	173	14	305
83	0.0033889	28	148	23	268
84	0.0032654	5	114	16	223
85	0.0032857	23	139	23	255
86	0.0027529	46	133	12	220
87	0.0035786	50	139	24	228
88	0.003607	75	190	24	305
89	0.003281	51	141	19	231
90	0.0035384	33	150	19	267
91	0.0034284	8	123	19	238
92	0.0033396	24	127	22	230
93	0.0034046	21	138	20	255
94	0.003431	9	140	17	271
95	0.0033227	19	125	14	231
96	0.0030861	25	139	20	253
97	0.0032598	67	176	24	285
98	0.0031749	81	178	28	275
99	0.0032698	13	137	14	261
100	0.0032908	3	127	19	251
101	0.0034659	38	129	17	220
102	0.0031361	44	131	17	218
103	0.0032562	1	126	22	251
104	0.0035867	69	161	18	253
105	0.0032482	74	194	22	314
106	0.0030741	11	149	18	287
107	0.0031699	42	145	16	248
108	0.003254	25	135	16	245
109	0.0032428	10	116	13	222
110	0.0033162	16	135	17	254
111	0.0031546	41	139	18	237
112	0.0030826	88	167	20	246
113	0.0035826	43	154	16	265
114	0.003652	3	126	22	249
115	0.0034146	37	132	25	227
116	0.0032326	3	127	20	251
117	0.0029948	20	128	16	236
118	0.003579	47	160	18	273
119	0.0038036	55	143	15	231
120	0.0032124	86	177	18	268
121	0.0035483	0	123	24	246
122	0.003369	21	112	19	203
123	0.0032797	33	123	19	213
124	0.0038621	16	128	15	240
125	0.0031953	15	134	24	253
126	0.0029735	4	122	23	240
127	0.0036945	8	139	17	270
128	0.0033692	32	140	16	248
129	0.0032515	3	126	17	249
130	0.0030354	36	135	17	234
131	0.0028607	58	149	18	240
132	0.0032851	15	121	21	227
133	0.0032473	23	117	16	211
134	0.0032799	27	132	17	237
135	0.0035274	1	133	20	265
136	0.0037797	29	145	19	261
137	0.0035436	30	144	12	258
138	0.0032113	3	135	19	267
139	0.0033425	9	133	17	257
140	0.0035713	99	179	29	259
141	0.0033303	29	160	17	291
142	0.0037587	119	200	21	281
143	0.0032158	30	168	25	306
144	0.0034825	33	131	17	229
145	0.0034186	73	157	17	241
146	0.0034813	26	131	23	236
147	0.0031074	15	133	17	251
148	0.0031105	15	130	18	245
149	0.0037155	11	148	16	285
150	0.0032093	61	166	16	271
151	0.0032874	37	138	13	239
152	0.0030917	51	147	18	243
153	0.003103	52	140	19	228
154	0.0031122	41	132	17	223
155	0.0030736	52	144	23	236
156	0.0034931	48	156	23	264
157	0.0032425	28	144	15	260
158	0.0030059	44	143	22	242
159	0.0032932	103	189	21	275
160	0.0028901	29	128	15	227
161	0.0032549	109	200	21	291
162	0.0030111	22	130	14	238
163	0.0032999	26	137	17	248
164	0.0032829	23	135	22	247
165	0.0034924	13	142	20	271
166	0.002998	47	148	26	249
167	0.0032332	11	129	21	247
168	0.0032638	40	140	18	240
169	0.0032652	62	151	15	240
170	0.0029749	58	136	17	214
171	0.0030416	9	130	17	251
172	0.0033079	29	135	12	241
173	0.003404	31	139	16	247
174	0.0034232	62	169	24	276
175	0.0035629	56	146	20	236
176	0.00338	0	132	17	264
177	0.0032186	43	148	23	253
178	0.003383	23	146	16	269
179	0.0030759	21	141	25	261
180	0.0036596	33	158	15	283
181	0.0032126	5	122	16	239
182	0.0032119	37	145	17	253
183	0.0035207	17	130	20	243
184	0.0033606	103	186	17	269
185	0.0034519	115	189	21	263
186	0.0034533	4	147	19	290
187	0.0034519	139	197	23	255
188	0.003335	37	152	15	267
189	0.0034825	36	156	16	276
190	0.0033492	12	148	14	284
191	0.0031329	28	121	18	214
192	0.0030864	19	149	26	279
193	0.0032986	28	148	17	268
194	0.0033819	11	139	14	267
195	0.0030257	36	141	24	246
196	0.0034245	4	137	17	270
197	0.003646	11	131	16	251
198	0.0033355	44	137	25	230
199	0.0033716	69	174	17	279
200	0.0032658	56	161	26	266
201	0.0031581	86	178	25	270
202	0.0036254	64	178	24	292
203	0.0030406	41	163	18	285
204	0.0030906	34	135	16	236
205	0.0033219	38	149	19	260
206	0.0035072	5	108	13	211
207	0.003302	20	134	15	248
208	0.0031294	16	138	20	260
209	0.0031129	23	117	13	211
210	0.0035615	42	156	16	270
211	0.0033242	97	193	19	289
212	0.0032111	41	149	13	257
213	0.003114	9	116	17	223
214	0.0031597	94	173	28	252
215	0.0033151	30	139	16	248
216	0.0032832	63	146	13	229
217	0.0032133	16	120	24	224
218	0.0035817	21	142	18	263
219	0.0034355	55	153	22	251
220	0.0033089	5	133	17	261
221	0.0034328	20	145	16	270
222	0.0033383	16	136	26	256
223	0.0036212	5	146	17	287
224	0.0035031	32	134	22	236
225	0.0031856	10	131	19	252
226	0.0034777	50	154	20	258
227	0.0036102	41	152	18	263
228	0.0032007	21	155	24	289
229	0.0031756	5	136	20	267
230	0.0030936	59	160	21	261
231	0.0034771	22	136	17	250
232	0.0031767	32	158	17	284
233	0.0031784	10	142	21	274
234	0.0034229	11	121	17	231
235	0.0034807	14	124	19	234
236	0.0033582	70	159	16	248
237	0.0035773	19	158	18	297
238	0.0033553	108	184	27	260
239	0.0035382	4	132	18	260
240	0.0031141	8	133	21	258
241	0.0031413	39	147	28	255
242	0.0034801	13	149	15	285
243	0.002987	19	125	20	231
244	0.0035829	93	184	20	275
245	0.0034693	24	131	18	238
246	0.0031203	51	183	16	315
247	0.003398	25	142	15	259
248	0.0036008	18	141	28	264
249	0.0034006	53	161	23	269
250	0.0033066	116	177	24	238
251	0.0029917	9	128	17	247
252	0.0035423	39	158	22	277
253	0.0032678	13	139	16	265
254	0.0037266	40	149	21	258
255	0.0033617	6	148	21	290
256	0.0035766	9	149	15	289
257	0.0034025	12	127	24	242
258	0.0031587	20	122	21	224
259	0.0032993	2	114	14	226
260	0.003576	59	180	16	301
261	0.0032007	4	131	18	258
262	0.003042	21	122	15	223
263	0.0031259	25	133	22	241
264	0.0030422	22	125	25	228
265	0.0035742	6	142	17	278
266	0.0036607	106	207	20	308
267	0.0031483	46	144	23	242
268	0.0035068	65	151	14	237
269	0.0030435	91	173	17	255
270	0.0034118	40	147	19	254
271	0.0034252	52	168	15	284
272	0.0032664	55	155	22	255
273	0.0032574	20	141	19	262
274	0.0032909	18	137	18	256
275	0.0039256	0	126	15	252
276	0.0034013	23	140	18	257
277	0.0035586	6	116	20	226
278	0.0032449	13	115	15	217
279	0.0033291	50	163	28	276
280	0.0031048	39	129	12	219
281	0.0034211	28	160	23	292
282	0.0034045	36	144	16	252
283	0.0033355	66	164	18	262
284	0.0037992	19	131	15	243
285	0.0038648	15	158	14	301
286	0.0033561	6	120	14	234
287	0.003282	33	157	15	281
288	0.0032044	47	154	23	261
289	0.003241	72	182	21	292
290	0.0033582	44	163	18	282
291	0.0035709	0	134	19	268
292	0.0032204	39	135	19	231
293	0.0034139	27	140	14	253
294	0.0032094	28	147	22	266
295	0.0034662	32	146	15	260
296	0.0035036	49	161	26	273
297	0.0035938	35	151	21	267
298	0.0033603	34	150	22	266
299	0.003363	5	144	21	283
300	0.0033352	42	145	17	248
301	0.0030706	55	158	21	261
302	0.0032459	58	161	24	264
303	0.0035594	3	128	18	253
304	0.003499	74	159	19	244
305	0.0029175	22	110	13	198
306	0.0031619	8	113	15	218
307	0.0033929	53	160	17	267
308	0.0033512	7	111	16	215
309	0.0033036	81	158	21	235
310	0.0030172	50	142	20	234
311	0.0034513	12	129	15	246
312	0.0031114	45	153	20	261
313	0.0031376	70	161	19	252
314	0.0033217	60	140	19	220
315	0.0033668	10	113	15	216
316	0.0030399	64	141	13	218
317	0.0032394	32	124	20	216
318	0.0032773	18	123	15	228
319	0.0031869	9	136	18	263
320	0.0031262	51	139	18	227
321	0.0030633	13	121	22	229
322	0.0033183	19	130	25	241
323	0.0035434	74	163	27	252
324	0.0032446	22	126	17	230
325	0.0033609	133	206	19	279
326	0.0031292	2	132	17	262
327	0.0033976	20	128	16	236
328	0.0036386	5	151	20	297
329	0.0033428	5	124	19	243
330	0.0031686	12	148	18	284
331	0.0034245	1	132	18	263
332	0.0031259	25	135	14	245
333	0.0030874	21	116	27	211
334	0.0035559	19	154	14	289
335	0.0034176	66	152	19	238
336	0.0037097	23	156	17	289
337	0.0030889	35	123	21	211
338	0.0031418	63	153	15	243
339	0.003493	105	182	21	259
340	0.0032366	31	141	15	251
341	0.0036188	62	165	19	268
342	0.0031677	17	132	15	247
343	0.0034494	9	113	13	217
344	0.0029634	64	159	25	254
345	0.0035186	17	122	16	227
346	0.0034431	48	167	19	286
347	0.0035585	57	182	22	307
348	0.0029704	58	164	19	270
349	0.0032118	23	140	19	257
350	0.0031704	52	146	14	240
351	0.0035515	57	140	17	223
352	0.0037244	12	127	14	242
353	0.0033522	33	136	25	239
354	0.0032649	39	153	23	267
355	0.0035835	5	139	23	273
356	0.003041	15	120	22	225
357	0.003638	33	139	14	245
358	0.0033861	16	127	22	238
359	0.0035969	46	156	21	266
360	0.0030191	20	134	16	248
361	0.0031889	49	144	16	239
362	0.0034465	39	135	15	231
363	0.0033018	2	128	23	254
364	0.0032796	28	133	17	238
365	0.0033343	36	145	13	254
366	0.0031778	22	126	16	230
367	0.0030298	27	131	18	235
368	0.0032807	17	141	22	265
369	0.0033644	72	162	24	252
370	0.0037281	47	158	18	269
371	0.0034003	18	132	19	246
372	0.0033299	33	153	17	273
373	0.0032514	39	135	27	231
374	0.0029323	50	137	13	224
375	0.0032762	43	139	15	235
376	0.0033702	11	121	22	231
377	0.0034804	53	151	19	249
378	0.0032361	13	137	18	261
379	0.0033953	18	127	16	236
380	0.0033524	63	176	23	289
381	0.0031522	28	168	22	308
382	0.0043394	8	157	21	306
383	0.0030764	30	151	20	272
384	0.0033767	70	162	26	254
385	0.0033316	71	167	21	263
386	0.0032964	30	128	26	226
387	0.0035413	5	135	20	265
388	0.0034758	17	124	20	231
389	0.0032928	82	178	20	274
390	0.003499	131	213	17	295
391	0.0033254	47	133	13	219
392	0.0030706	45	143	24	241
393	0.0031429	18	124	25	230
394	0.0032854	18	127	15	236
395	0.0031038	9	140	14	271
396	0.0031684	29	137	18	245
397	0.0034411	46	145	16	244
398	0.0033039	106	190	20	274
399	0.003422	47	158	25	269
400	0.0032036	28	142	16	256
401	0.0033524	66	167	23	268
402	0.0036333	37	172	23	307
403	0.0035207	60	164	24	268
404	0.0036107	34	143	18	252
405	0.0039181	11	153	19	295
406	0.0035565	59	153	22	247
407	0.0032911	39	150	23	261
408	0.0030448	12	128	21	244
409	0.0035004	18	130	20	242
410	0.0032096	37	133	15	229
411	0.0034898	21	119	16	217
412	0.0030224	9	130	17	251
413	0.0032207	48	159	21	270
414	0.003558	6	133	15	260
415	0.0030527	1	119	14	237
416	0.0032012	1	127	15	253
417	0.0030301	6	137	22	268
418	0.0032688	9	126	17	243
419	0.0031406	22	126	17	230
420	0.0035773	27	136	16	245
421	0.0032581	7	135	17	263
422	0.0033797	13	114	15	215
423	0.0034424	19	137	15	255
424	0.0035941	70	185	19	300
425	0.0036057	87	174	18	261
426	0.0029891	97	193	23	289
427	0.003374	30	136	28	242
428	0.003793	37	144	13	251
429	0.0035446	30	137	24	244
430	0.0033217	36	151	23	266
431	0.0033413	32	131	15	230
432	0.0029961	40	138	14	236
433	0.0031845	62	168	18	274
434	0.003856	45	154	17	263
435	0.0038189	42	154	20	266
436	0.0033296	20	129	23	238
437	0.0034815	81	158	18	235
438	0.003406	44	172	19	300
439	0.003842	10	163	19	316
440	0.0031884	13	151	22	289
441	0.0032907	52	167	17	282
442	0.0035906	28	151	18	274
443	0.0037608	7	159	18	311
444	0.0033384	78	157	18	236
445	0.0030893	7	133	14	259
446	0.0033167	33	135	15	237
447	0.0030908	84	165	17	246
448	0.0030297	18	129	20	240
449	0.0035792	46	169	16	292
450	0.0045757	41	144	25	247
451	0.0032257	37	150	15	263
452	0.0035609	54	164	17	274
453	0.0034643	6	124	23	242
454	0.0036307	3	127	13	251
455	0.0032662	62	157	17	252
456	0.0033245	13	134	14	255
457	0.0031046	1	133	20	265
458	0.0031176	3	145	26	287
459	0.003429	1	134	24	267
460	0.0035175	16	127	16	238
461	0.0031786	78	158	17	238
462	0.0035765	81	163	15	245
463	0.0033664	74	156	29	238
464	0.0035324	0	127	19	254
465	0.0033346	64	153	22	242
466	0.0032845	38	151	15	264
467	0.0033537	30	135	17	240
468	0.0031495	10	128	22	246
469	0.0033314	48	160	21	272
470	0.0032748	35	141	16	247
471	0.0036282	2	128	20	254
472	0.0032389	64	174	18	284
473	0.0034597	36	139	17	242
474	0.0034148	36	139	22	242
475	0.003833	28	155	24	282
476	0.0029055	4	124	22	244
477	0.0034656	31	156	16	281
478	0.003458	34	143	29	252
479	0.0029782	55	138	26	221
480	0.003262	28	143	15	258
481	0.0035688	6	129	13	252
482	0.0033105	50	159	19	268
483	0.0036502	88	185	17	282
484	0.0032648	13	128	16	243
485	0.0031682	47	158	23	269
486	0.0034345	50	141	12	232
487	0.0032825	47	157	17	267
488	0.0032105	24	116	23	208
489	0.0037049	36	153	21	270
490	0.0034672	44	163	21	282
491	0.0033039	17	137	23	257
492	0.00322	81	172	15	263
493	0.0034787	51	152	18	253
494	0.003333	17	127	17	237
495	0.0032292	25	142	26	259
496	0.0035706	16	150	17	284
497	0.003561	57	144	15	231
498	0.0031121	22	138	17	254
499	0.0035001	13	135	27	257
500	0.0032662	29	119	20	209
501	0.003263	3	94	14	185
502	0.0035368	7	141	22	275
503	0.0031326	30	149	23	268
504	0.0036058	5	133	19	261
505	0.003399	51	155	20	259
506	0.0034584	29	148	19	267
507	0.0034393	0	142	18	284
508	0.0033753	102	200	18	298
509	0.0030402	21	125	17	229
510	0.0032837	30	159	18	288
511	0.0031862	6	131	22	256
512	0.0034871	60	183	25	306
513	0.0033255	27	155	18	283
514	0.0044964	54	142	19	230
515	0.003567	46	162	20	278
516	0.0032805	3	120	19	237
517	0.0037515	0	115	13	230
518	0.0032383	48	147	24	246
519	0.0033457	41	160	25	279
520	0.0033963	4	117	17	230
521	0.0034972	8	124	15	240
522	0.003324	24	127	17	230
523	0.0031814	22	123	27	224
524	0.0033179	4	117	15	230
525	0.0034353	97	156	15	215
526	0.0040363	4	109	19	214
527	0.0032138	17	136	17	255
528	0.0029572	73	164	18	255
529	0.0032333	19	151	20	283
530	0.0033138	11	148	17	285
531	0.0033806	41	151	16	261
532	0.0030589	18	125	16	232
533	0.0032091	46	141	19	236
534	0.0039033	35	148	19	261
535	0.0033158	79	165	18	251
536	0.0033347	3	129	19	255
537	0.0034926	24	142	16	260
538	0.003714	32	131	26	230
539	0.00315	30	126	17	222
540	0.0043247	9	124	13	239
541	0.0035182	1	120	19	239
542	0.0032926	52	153	24	254
543	0.0033179	5	129	21	253
544	0.0031486	41	139	21	237
545	0.0036285	4	142	13	280
546	0.0033699	54	172	20	290
547	0.0037897	20	127	16	234
548	0.0028942	20	135	18	250
549	0.0033351	3	118	16	233
550	0.003176	41	129	18	217
551	0.0028333	46	163	26	280
552	0.0033667	34	151	17	268
553	0.0032506	11	123	18	235
554	0.0036694	96	170	15	244
555	0.0034415	13	145	24	277
556	0.0033064	29	146	24	263
557	0.0032092	33	128	19	223
558	0.0032625	119	210	18	301
559	0.0031321	15	122	13	229
560	0.0032839	3	146	26	289
561	0.0034602	45	154	18	263
562	0.003372	33	132	14	231
563	0.0031947	65	164	15	263
564	0.0033062	42	150	28	258
565	0.0034283	60	130	19	200
566	0.0037392	10	135	13	260
567	0.0035178	28	109	23	190
568	0.0031263	9	127	14	245
569	0.0032766	30	164	22	298
570	0.0035564	1	130	17	259
571	0.0033171	23	121	16	219
572	0.0034213	34	152	15	270
573	0.0033004	99	192	22	285
574	0.0032484	43	152	20	261
575	0.0032846	13	130	19	247
576	0.0031482	9	136	20	263
577	0.003512	79	155	17	231
578	0.0033589	5	133	21	261
579	0.0031518	8	134	20	260
580	0.0035084	75	147	18	219
581	0.0032295	39	168	20	297
582	0.0033869	17	138	18	259
583	0.0034359	19	133	17	247
584	0.0035554	7	129	16	251
585	0.0031815	13	126	27	239
586	0.0035337	58	175	20	292
587	0.0032943	16	128	13	240
588	0.0035577	33	133	26	233
589	0.0033242	11	128	23	245
590	0.0033807	50	142	20	234
591	0.0032777	44	140	21	236
592	0.0034276	20	136	24	252
593	0.0030745	4	122	16	240
594	0.0031252	55	139	15	223
595	0.003307	10	154	25	298
596	0.0035082	115	189	18	263
597	0.0031424	27	151	16	275
598	0.0031402	48	155	26	262
599	0.0029881	44	146	24	248
600	0.003338	45	148	21	251
601	0.0032318	184	230	21	276
602	0.0030843	40	142	20	244
603	0.0035032	57	169	24	281
604	0.0031848	48	131	18	214
605	0.0033474	15	128	17	241
606	0.0035639	12	141	19	270
607	0.0034631	49	158	18	267
608	0.0032589	33	152	20	271
609	0.0032237	16	139	22	262
610	0.00304	41	136	16	231
611	0.0030612	21	130	15	239
612	0.0032314	39	131	14	223
613	0.0032058	26	153	16	280
614	0.0031137	53	147	19	241
615	0.0031632	31	154	23	277
616	0.0033635	19	136	13	253
617	0.0030426	2	128	17	254
618	0.0033028	96	175	19	254
619	0.0032523	37	122	17	207
620	0.0034019	10	138	17	266
621	0.0030773	74	158	28	242
622	0.0035003	103	169	22	235
623	0.0035434	30	128	19	226
624	0.0035503	86	169	20	252
625	0.0032663	39	123	19	207
626	0.0034029	35	159	20	283
627	0.003391	1	124	16	247
628	0.0033688	9	124	19	239
629	0.003204	43	132	16	221
630	0.0032969	18	126	24	234
631	0.0031935	10	113	19	216
632	0.0031911	69	172	20	275
633	0.0032353	13	120	14	227
634	0.0035016	29	165	20	301
635	0.0034891	66	174	17	282
636	0.0030391	20	126	20	232
637	0.0033193	77	173	17	269
638	0.0034753	66	134	24	202
639	0.003511	66	142	21	218
640	0.0032035	16	123	17	230
641	0.0036568	107	190	15	273
642	0.0030202	73	159	18	245
643	0.0035147	12	119	22	226
644	0.0031236	25	127	17	229
645	0.0034995	44	142	23	240
646	0.0031218	4	135	21	266
647	0.003182	12	123	21	234
648	0.0035956	28	125	13	222
649	0.0031523	50	157	18	264
650	0.0033335	26	165	16	304
651	0.0035649	41	167	20	293
652	0.0034347	65	140	19	215
653	0.0033172	21	131	16	241
654	0.0038665	49	165	25	281
655	0.0033285	88	187	17	286
656	0.003677	25	143	18	261
657	0.0033249	10	146	22	282
658	0.0033136	27	149	27	271
659	0.003202	14	133	17	252
660	0.0040321	30	154	22	278
661	0.003469	49	127	16	205
662	0.003583	72	180	15	288
663	0.0033878	17	148	17	279
664	0.003332	44	135	15	226
665	0.0032273	56	138	23	220
666	0.0033199	10	149	23	288
667	0.0030124	15	104	16	193
668	0.0033909	8	139	14	270
669	0.0031434	14	151	17	288
670	0.0033658	33	144	24	255
671	0.0037365	49	150	18	251
672	0.0032484	113	177	18	241
673	0.0033708	16	143	16	270
674	0.0038672	99	161	19	223
675	0.0032784	9	129	17	249
676	0.0031823	25	129	20	233
677	0.003395	80	169	19	258
678	0.0033607	47	160	18	273
679	0.0035059	38	142	17	246
680	0.0034331	11	137	16	263
681	0.0031156	23	124	19	225
682	0.0033165	47	159	18	271
683	0.0034271	16	140	16	264
684	0.0033501	15	126	12	237
685	0.0033541	7	114	15	221
686	0.0036026	10	136	15	262
687	0.0034168	48	139	24	230
688	0.0035709	66	155	24	244
689	0.0031354	96	166	16	236
690	0.0032988	2	125	20	248
691	0.0033918	0	122	25	244
692	0.0035837	37	144	18	251
693	0.0030383	44	154	19	264
694	0.0031795	55	166	25	277
695	0.0036151	47	154	16	261
696	0.0032827	88	167	21	246
697	0.0032794	34	169	19	304
698	0.0034476	9	144	22	279
699	0.0039366	56	176	16	296
700	0.0032744	10	120	16	230
701	0.0030862	91	157	23	223
702	0.0031901	74	155	22	236
703	0.0033787	19	130	15	241
704	0.0035298	47	162	23	277
705	0.0032829	74	180	20	286
706	0.003592	38	140	19	242
707	0.0032615	24	133	17	242
708	0.0032598	73	176	19	279
709	0.0033305	43	127	28	211
710	0.0038894	16	138	28	260
711	0.0034631	40	162	23	284
712	0.003223	9	133	15	257
713	0.003504	21	143	17	265
714	0.0036776	27	153	22	279
715	0.0034816	26	149	18	272
716	0.0031729	61	166	21	271
717	0.003249	22	136	17	250
718	0.0034367	95	205	19	315
719	0.0032878	50	169	18	288
720	0.0032988	17	151	20	285
721	0.0032404	52	136	18	220
722	0.0031227	14	120	19	226
723	0.0035032	43	151	19	259
724	0.003664	10	129	19	248
725	0.0032003	22	133	16	244
726	0.0031916	50	153	15	256
727	0.003182	7	121	17	235
728	0.0033298	92	174	17	256
729	0.0033643	17	140	15	263
730	0.0031856	99	180	18	261
731	0.0035771	45	140	15	235
732	0.0032903	32	120	17	208
733	0.0036365	9	138	14	267
734	0.0031435	52	147	22	242
735	0.0035234	53	146	16	239
736	0.0038054	95	171	16	247
737	0.0032713	8	152	27	296
738	0.00323	52	145	22	238
739	0.0036768	74	166	15	258
740	0.0032618	9	123	20	237
741	0.0032349	74	158	16	242
742	0.0032234	49	140	19	231
743	0.0035786	27	158	17	289
744	0.0034737	9	155	19	301
745	0.0032874	20	122	24	224
746	0.0037262	13	115	19	217
747	0.0036008	56	146	19	236
748	0.0031405	11	136	22	261
749	0.0033954	38	141	13	244
750	0.0032262	18	134	19	250
751	0.0036003	62	171	18	280
752	0.0031709	42	140	23	238
753	0.003138	45	153	19	261
754	0.0034223	7	122	17	237
755	0.0031733	52	139	18	226
756	0.0039599	91	172	18	253
757	0.0037216	84	175	25	266
758	0.003611	4	150	15	296
759	0.0032481	3	156	20	309
760	0.0032632	13	130	20	247
761	0.0030754	6	118	18	230
762	0.0032861	61	154	17	247
763	0.0031175	116	187	23	258
764	0.0032248	35	151	19	267
765	0.0036645	21	142	23	263
766	0.0033042	49	145	15	241
767	0.0032141	30	144	18	258
768	0.0034796	33	149	16	265
769	0.0034696	14	134	20	254
770	0.0034904	60	162	26	264
771	0.0032588	16	129	21	242
772	0.0031876	33	119	16	205
773	0.0034837	46	129	18	212
774	0.0032225	64	152	20	240
775	0.0031719	32	135	21	238
776	0.0036798	43	137	19	231
777	0.0035319	66	160	24	254
778	0.0030822	49	135	19	221
779	0.0031543	17	125	14	233
780	0.0030919	39	148	21	257
781	0.0030133	39	142	18	245
782	0.0034292	22	151	24	280
783	0.0032578	9	123	19	237
784	0.0038779	16	129	17	242
785	0.0037845	48	183	21	318
786	0.0032043	29	126	19	223
787	0.0033325	2	117	17	232
788	0.0033165	24	135	19	246
789	0.0037613	3	127	17	251
790	0.0034136	73	145	17	217
791	0.0032879	31	144	18	257
792	0.0031953	56	148	16	240
793	0.0030439	53	160	20	267
794	0.0029824	39	147	18	255
795	0.0031945	25	150	19	275
796	0.0031933	41	145	19	249
797	0.0040735	50	167	22	284
798	0.0035914	33	142	17	251
799	0.0032178	13	125	21	237
800	0.0031503	67	167	19	267
801	0.0032386	15	148	18	281
802	0.0027593	81	181	24	281
803	0.0033675	35	166	18	297
804	0.0034274	89	178	24	267
805	0.0032601	53	172	21	291
806	0.0035003	25	143	19	261
807	0.0033392	21	141	19	261
808	0.0032077	34	107	21	180
809	0.0036053	115	194	17	273
810	0.0032345	36	158	28	280
811	0.0031294	57	135	16	213
812	0.0033725	24	115	14	206
813	0.0031053	56	150	21	244
814	0.0032942	32	143	16	254
815	0.0030935	4	108	19	212
816	0.0028895	53	157	28	261
817	0.0033674	73	160	23	247
818	0.0031769	81	182	24	283
819	0.0030612	64	161	20	258
820	0.0031874	23	140	19	257
821	0.0040039	64	181	19	298
822	0.0034914	118	171	19	224
823	0.0031792	12	124	16	236
824	0.0034929	1	124	14	247
825	0.0038591	25	153	16	281
826	0.0033436	95	186	23	277
827	0.0031542	8	97	26	186
828	0.0035462	25	130	20	235
829	0.0030904	32	136	26	240
830	0.0030614	121	202	24	283
831	0.0034604	34	141	19	248
832	0.0031148	45	141	19	237
833	0.0034017	39	136	13	233
834	0.0031895	11	126	18	241
835	0.0033386	8	113	12	218
836	0.0030995	97	191	23	285
837	0.003512	12	126	18	240
838	0.0033136	119	214	20	309
839	0.0031387	6	152	20	298
840	0.0031322	13	147	24	281
841	0.003187	13	124	15	235
842	0.0033489	64	149	18	234
843	0.0034088	76	166	16	256
844	0.0036516	7	123	17	239
845	0.0034533	22	153	25	284
846	0.0037281	72	165	14	258
847	0.0032937	23	122	18	221
848	0.0033693	6	118	16	230
849	0.0031092	12	116	21	220
850	0.0033383	22	142	18	262
851	0.0033362	70	177	20	284
852	0.0029819	10	128	21	246
853	0.003652	93	171	28	249
854	0.0035033	5	137	20	269
855	0.0033785	5	134	21	263
856	0.003605	3	127	19	251
857	0.0032282	42	117	19	192
858	0.0034614	36	147	23	258
859	0.0038918	64	158	25	252
860	0.003539	18	133	19	248
861	0.0032628	74	146	14	218
862	0.0033009	25	139	17	253
863	0.0034771	48	147	23	246
864	0.0035191	59	171	17	283
865	0.0032103	23	131	16	239
866	0.003635	4	124	15	244
867	0.0037087	134	214	22	294
868	0.0035339	12	123	17	234
869	0.0034284	18	125	15	232
870	0.0037729	68	163	23	258
871	0.0048813	1	126	16	251
872	0.0029919	45	137	22	229
873	0.0033332	26	141	13	256
874	0.0032125	131	184	25	237
875	0.0032371	31	137	21	243
876	0.0035149	40	149	15	258
877	0.0032816	78	190	25	302
878	0.0030875	8	127	19	246
879	0.0031588	16	131	18	246
880	0.0035123	1	126	19	251
881	0.0033171	8	123	26	238
882	0.0033341	46	147	16	248
883	0.0033787	44	163	27	282
884	0.0030714	5	102	12	199
885	0.003903	0	136	12	272
886	0.0030561	5	107	23	209
887	0.0032987	53	167	22	281
888	0.0032398	38	152	20	266
889	0.0032693	74	153	14	232
890	0.0038848	16	123	16	230
891	0.0039078	95	188	17	281
892	0.0034283	26	140	17	254
893	0.0032538	7	116	16	225
894	0.0031858	47	135	15	223
895	0.0032385	11	132	18	253
896	0.0031515	10	106	15	202
897	0.0032072	0	129	21	258
898	0.0035826	63	172	20	281
899	0.003634	28	143	23	258
900	0.0034382	50	155	15	260
901	0.003379	38	146	25	254
902	0.003493	37	134	17	231
903	0.0031	11	116	17	221
904	0.0033539	8	134	24	260
905	0.0035183	25	137	23	249
906	0.0033173	52	153	21	254
907	0.003224	1	127	22	253
908	0.0031047	31	118	20	205
909	0.0032696	11	145	21	279
910	0.0033518	38	164	21	290
911	0.0033324	24	138	15	252
912	0.0031735	69	154	20	239
913	0.0042547	42	154	16	266
914	0.0033162	73	183	20	293
915	0.0035452	3	125	16	247
916	0.003143	35	144	20	253
917	0.0033616	9	132	22	255
918	0.0039601	17	141	25	265
919	0.0032676	63	144	23	225
920	0.0030728	6	116	21	226
921	0.0036314	2	146	18	290
922	0.003235	22	151	17	280
923	0.0033227	42	155	16	268
924	0.003177	9	137	23	265
925	0.0034084	33	137	15	241
926	0.0034821	46	147	17	248
927	0.0030712	109	165	22	221
928	0.0031102	71	177	24	283
929	0.0033517	38	159	18	280
930	0.0033491	67	163	16	259
931	0.0036186	40	148	19	256
932	0.0032973	10	143	18	276
933	0.0039147	46	148	13	250
934	0.0032632	7	123	21	239
935	0.0039474	94	189	20	284
936	0.0031982	13	117	16	221
937	0.0032848	32	146	17	260
938	0.0035008	127	194	20	261
939	0.0038984	33	162	19	291
940	0.0036221	38	156	20	274
941	0.0036781	88	189	19	290
942	0.0034245	39	134	20	229
943	0.0030896	34	124	14	214
944	0.0033375	60	160	23	260
945	0.003419	12	135	21	258
946	0.0032476	29	123	18	217
947	0.0036137	49	154	18	259
948	0.0034404	1	120	19	239
949	0.0033619	40	135	16	230
950	0.0035313	2	135	19	268
951	0.0032749	44	135	18	226
952	0.0033018	13	132	15	251
953	0.0032796	101	197	24	293
954	0.0038392	26	146	23	266
955	0.0031196	34	142	14	250
956	0.003294	27	164	25	301
957	0.0036553	84	141	17	198
958	0.0031837	9	119	16	229
959	0.0034642	23	164	23	305
960	0.0032085	39	127	14	215
961	0.0036769	92	189	20	286
962	0.0036479	11	117	16	223
963	0.0037286	51	170	15	289
964	0.0036605	15	151	19	287
965	0.0033799	4	108	12	212
966	0.003244	21	142	21	263
967	0.003318	86	171	16	256
968	0.0035635	43	149	16	255
969	0.0036735	20	132	16	244
970	0.0034339	30	148	19	266
971	0.0032536	21	143	16	265
972	0.0031063	55	151	15	247
973	0.0033175	17	127	18	237
974	0.0035132	33	144	16	255
975	0.0035138	36	132	21	228
976	0.003429	54	153	20	252
977	0.0035409	56	175	28	294
978	0.0033644	27	138	20	249
979	0.0036415	6	122	18	238
980	0.0032132	18	151	18	284
981	0.0031753	14	133	16	252
982	0.003385	19	128	17	237
983	0.0034137	13	133	23	253
984	0.0037723	41	153	18	265
985	0.0036721	12	149	24	286
986	0.0030639	11	134	18	257
987	0.0034934	20	143	17	266
988	0.0033185	6	146	22	286
989	0.0033092	13	127	15	241
990	0.0029759	14	130	21	246
991	0.0030141	3	133	28	263
992	0.0031498	21	137	20	253
993	0.0034257	51	162	18	273
994	0.0031927	31	140	22	249
995	0.0030773	57	136	13	215
996	0.0033394	4	139	19	274
997	0.0032936	16	139	17	262
998	0.0036437	6	108	15	210
999	0.0035787	23	142	15	261
mean	0.00336161	35.767	144.479	18.956	253.191

## Sheet: DACC_D
	time	SEq	Bal	Reg	Egal
0	0.000933	36	149	17	262
1	0.0009611	46	176	18	306
2	0.0008296	33	120	18	207
3	0.0007792	42	143	18	244
4	0.0009135	31	162	18	293
5	0.0007472	38	127	16	216
6	0.0008512	4	140	24	276
7	0.0007743	76	148	26	220
8	0.0008797	66	148	20	230
9	0.0008474	42	137	14	232
10	0.0008447	26	141	18	256
11	0.0008914	79	175	18	271
12	0.0010581	14	141	18	268
13	0.000981	94	184	22	274
14	0.0008008	21	136	21	251
15	0.0008609	51	165	19	279
16	0.0008576	19	149	19	279
17	0.0010464	89	184	24	279
18	0.0008515	34	159	23	284
19	0.0009635	73	179	20	285
20	0.0015658	73	169	22	265
21	0.0008909	91	169	23	247
22	0.0007414	45	135	19	225
23	0.0007857	52	160	18	268
24	0.0008698	16	137	16	258
25	0.0008331	3	119	13	235
26	0.0009743	21	129	16	237
27	0.0007556	5	114	14	223
28	0.0008419	14	125	25	236
29	0.0010167	25	148	20	271
30	0.0008403	27	136	19	245
31	0.000881	82	175	16	268
32	0.0008208	37	151	21	265
33	0.0009955	5	124	15	243
34	0.0010214	9	131	17	253
35	0.000865	49	162	23	275
36	0.0008136	50	138	13	226
37	0.0008612	53	151	20	249
38	0.000721	6	116	15	226
39	0.0008972	79	164	23	249
40	0.0008503	18	146	16	274
41	0.0009855	21	141	22	261
42	0.0007576	46	130	17	214
43	0.000916	84	188	28	292
44	0.0008671	20	132	29	244
45	0.0008178	7	128	16	249
46	0.0008734	15	133	16	251
47	0.0009601	55	167	17	279
48	0.0009696	23	150	29	277
49	0.0010475	176	242	28	308
50	0.0008023	133	204	26	275
51	0.0009488	15	135	26	255
52	0.0011017	23	153	18	283
53	0.0009986	28	159	22	290
54	0.0008112	31	126	19	221
55	0.0009088	119	185	26	251
56	0.0008859	15	118	17	221
57	0.0009539	14	138	21	262
58	0.0008865	62	175	19	288
59	0.0007646	67	159	21	251
60	0.0008853	29	130	18	231
61	0.0007865	13	141	17	269
62	0.0008657	37	136	16	235
63	0.000861	23	149	17	275
64	0.0007955	1	121	19	241
65	0.000758	9	139	16	269
66	0.0007464	1	127	18	253
67	0.0008873	28	146	17	264
68	0.0009563	74	163	18	252
69	0.0008369	101	181	22	261
70	0.0009264	18	135	19	252
71	0.0008909	31	140	27	249
72	0.0008005	26	128	20	230
73	0.0008616	79	178	28	277
74	0.0009468	23	159	23	295
75	0.0009051	31	156	24	281
76	0.0008391	48	147	18	246
77	0.0008158	7	139	20	271
78	0.000912	71	194	17	317
79	0.0008956	8	121	21	234
80	0.0010009	25	163	20	301
81	0.0009425	25	143	23	261
82	0.0009001	14	156	16	298
83	0.0009432	13	144	23	275
84	0.0007906	65	145	16	225
85	0.0009427	9	135	23	261
86	0.000879	46	133	12	220
87	0.0007601	23	126	24	229
88	0.0010377	75	190	24	305
89	0.0008026	83	165	20	247
90	0.0008621	33	150	19	267
91	0.0008422	17	133	19	249
92	0.0007824	24	127	22	230
93	0.0008326	21	138	20	255
94	0.0009101	62	164	20	266
95	0.000856	41	136	14	231
96	0.0011485	25	139	20	253
97	0.0008225	188	263	28	338
98	0.000896	8	144	28	280
99	0.0007682	13	137	14	261
100	0.0008888	42	148	16	254
101	0.0008241	20	128	17	236
102	0.0007965	59	141	17	223
103	0.0008827	45	155	21	265
104	0.0009369	65	167	18	269
105	0.0010158	74	194	22	314
106	0.0009151	64	161	22	258
107	0.0010133	42	145	16	248
108	0.0008613	25	135	16	245
109	0.0008156	10	116	13	222
110	0.000878	16	135	17	254
111	0.0008273	41	139	18	237
112	0.000996	26	147	20	268
113	0.0008152	41	159	20	277
114	0.000951	27	146	22	265
115	0.001084	8	132	25	256
116	0.0008599	3	127	20	251
117	0.0009097	20	128	16	236
118	0.0009112	47	160	18	273
119	0.0008805	5	123	20	241
120	0.0015077	28	148	18	268
121	0.0007711	10	133	23	256
122	0.0007875	59	144	27	229
123	0.0007652	40	145	25	250
124	0.0008591	42	145	16	248
125	0.0008905	15	134	24	253
126	0.000794	4	122	23	240
127	0.0008065	6	139	17	272
128	0.000845	32	140	16	248
129	0.0014049	24	138	17	252
130	0.0007666	79	171	26	263
131	0.0008152	58	149	18	240
132	0.0007448	31	132	19	233
133	0.0008706	72	149	21	226
134	0.0007633	37	144	19	251
135	0.0009903	48	161	22	274
136	0.0008812	86	179	19	272
137	0.0007876	30	144	12	258
138	0.0008827	3	135	19	267
139	0.0008683	39	153	23	267
140	0.0007872	57	162	29	267
141	0.0008064	26	150	17	274
142	0.0008819	15	151	21	287
143	0.0010056	30	168	25	306
144	0.0008745	13	135	21	257
145	0.0008604	73	157	17	241
146	0.0008074	26	131	23	236
147	0.0008931	15	133	17	251
148	0.0008048	14	138	21	262
149	0.000776	11	148	16	285
150	0.0009854	87	181	16	275
151	0.0009416	66	172	23	278
152	0.0007914	12	132	18	252
153	0.0009203	52	140	19	228
154	0.0006421	41	132	17	223
155	0.0009807	52	144	23	236
156	0.0010042	3	137	27	271
157	0.0007907	11	133	15	255
158	0.0009189	44	143	22	242
159	0.0008833	47	165	21	283
160	0.0007776	1	118	15	235
161	0.0011458	66	180	21	294
162	0.0008776	46	152	26	258
163	0.0007831	13	131	17	249
164	0.0008707	23	135	22	247
165	0.0008171	54	165	25	276
166	0.0009871	47	148	26	249
167	0.0008477	69	168	27	267
168	0.0008214	74	159	18	244
169	0.0007514	16	132	21	248
170	0.0007866	58	136	17	214
171	0.0009749	9	130	17	251
172	0.0008698	58	155	17	252
173	0.0007715	72	166	16	260
174	0.0008304	16	148	23	280
175	0.0007206	95	167	19	239
176	0.0008655	0	132	17	264
177	0.0009029	43	148	23	253
178	0.000873	142	233	26	324
179	0.0011176	39	152	23	265
180	0.0008716	33	160	22	287
181	0.0007613	15	132	16	249
182	0.0008832	37	145	17	253
183	0.0008787	107	183	29	259
184	0.000878	45	159	17	273
185	0.000892	115	189	21	263
186	0.0009477	4	147	19	290
187	0.0009538	139	197	23	255
188	0.0008028	28	155	17	282
189	0.000827	26	154	13	282
190	0.0009175	12	148	14	284
191	0.0008871	28	121	18	214
192	0.0009597	19	149	26	279
193	0.0007973	56	156	20	256
194	0.0007613	97	175	19	253
195	0.0008012	1	127	24	253
196	0.0009538	10	139	17	268
197	0.0009301	4	128	16	252
198	0.0009232	74	157	27	240
199	0.0009859	38	170	19	302
200	0.0008301	18	145	22	272
201	0.00093	86	178	25	270
202	0.0008929	89	191	24	293
203	0.0009099	41	163	18	285
204	0.0008748	34	135	16	236
205	0.0009587	22	146	18	270
206	0.0008606	21	116	13	211
207	0.0009253	102	184	21	266
208	0.0008324	43	163	27	283
209	0.0007487	23	117	13	211
210	0.0009239	59	162	18	265
211	0.0009286	23	161	19	299
212	0.0008058	41	149	13	257
213	0.0007855	77	154	24	231
214	0.0007621	35	148	20	261
215	0.0007746	30	139	16	248
216	0.0009381	6	130	27	254
217	0.0008676	16	120	24	224
218	0.0008373	56	161	18	266
219	0.0007742	55	153	22	251
220	0.0009013	5	133	17	261
221	0.0009134	57	164	19	271
222	0.0007945	32	144	26	256
223	0.0008747	147	221	23	295
224	0.0009087	32	134	22	236
225	0.0007732	83	167	21	251
226	0.0008955	142	202	28	262
227	0.0009086	12	145	18	278
228	0.0009349	21	155	24	289
229	0.001029	5	136	20	267
230	0.0008084	30	150	21	270
231	0.0008851	40	140	20	240
232	0.0010853	16	151	22	286
233	0.0007522	93	192	29	291
234	0.0007674	11	121	17	231
235	0.0007818	81	170	23	259
236	0.0011333	22	139	23	256
237	0.0009206	18	166	17	314
238	0.0008305	108	184	27	260
239	0.0009855	4	132	18	260
240	0.0009543	103	201	22	299
241	0.0009166	52	164	21	276
242	0.0010021	13	149	15	285
243	0.0008884	19	125	20	231
244	0.0009832	52	167	20	282
245	0.000834	24	131	18	238
246	0.0008757	51	183	16	315
247	0.0009777	34	153	26	272
248	0.0008527	3	136	28	269
249	0.0010984	53	161	23	269
250	0.0009397	46	142	27	238
251	0.0008904	11	129	17	247
252	0.0011124	5	144	22	283
253	0.0009952	13	139	16	265
254	0.0008841	13	143	18	273
255	0.0008676	6	148	21	290
256	0.0009633	19	155	15	291
257	0.0007615	20	138	24	256
258	0.0009794	20	122	21	224
259	0.0008438	2	114	14	226
260	0.0010232	150	238	28	326
261	0.0010166	4	131	18	258
262	0.0009055	28	125	17	222
263	0.0008663	34	146	22	258
264	0.0010482	44	139	25	234
265	0.0008457	6	142	17	278
266	0.0009726	70	181	20	292
267	0.0009384	46	144	23	242
268	0.00089	112	193	23	274
269	0.0010096	91	173	17	255
270	0.0009881	0	138	18	276
271	0.0009999	99	209	24	319
272	0.0008764	23	140	23	257
273	0.0008896	37	151	19	265
274	0.000855	18	137	18	256
275	0.0007771	0	126	15	252
276	0.0010169	23	140	18	257
277	0.0009417	6	116	20	226
278	0.0008623	13	115	15	217
279	0.000962	25	157	20	289
280	0.0007756	39	129	12	219
281	0.0008792	123	214	22	305
282	0.0009052	108	198	19	288
283	0.0009452	66	164	18	262
284	0.0007816	19	130	17	241
285	0.0009668	10	155	17	300
286	0.0007641	18	129	14	240
287	0.0008223	43	163	15	283
288	0.0008425	144	220	23	296
289	0.0009042	18	157	17	296
290	0.0008316	23	158	18	293
291	0.0009213	38	151	24	264
292	0.0008201	39	135	19	231
293	0.0008627	27	140	14	253
294	0.0008397	28	147	22	266
295	0.0008022	111	195	21	279
296	0.0009281	46	161	23	276
297	0.0010612	57	171	16	285
298	0.0008672	3	135	22	267
299	0.0010425	50	174	20	298
300	0.0010626	16	144	17	272
301	0.0009867	55	158	21	261
302	0.0009351	49	173	19	297
303	0.0008652	74	165	24	256
304	0.0010354	9	132	20	255
305	0.0007438	56	137	24	218
306	0.0008061	8	113	15	218
307	0.0012143	32	154	17	276
308	0.0008342	7	111	16	215
309	0.0008207	121	190	21	259
310	0.0009664	50	142	20	234
311	0.0007892	23	138	18	253
312	0.0009389	13	138	23	263
313	0.0008888	34	151	26	268
314	0.0008539	60	140	19	220
315	0.0007592	37	127	15	217
316	0.0008291	39	132	13	225
317	0.0007786	46	143	26	240
318	0.0008879	12	125	15	238
319	0.0009179	9	136	18	263
320	0.0009087	34	131	18	228
321	0.0007225	13	121	22	229
322	0.0008771	28	139	25	250
323	0.0008873	29	142	22	255
324	0.0009043	22	126	17	230
325	0.0009722	52	175	25	298
326	0.0009158	75	168	19	261
327	0.0013515	112	180	18	248
328	0.0009739	153	247	26	341
329	0.0008788	5	124	19	243
330	0.0007526	70	158	18	246
331	0.0008503	65	171	28	277
332	0.000969	138	219	26	300
333	0.0007469	6	114	15	222
334	0.0008278	23	149	18	275
335	0.0010433	38	142	19	246
336	0.0009475	23	156	17	289
337	0.001111	72	147	21	222
338	0.0009758	86	166	15	246
339	0.0008551	33	151	22	269
340	0.0011124	44	157	28	270
341	0.0010095	39	166	21	293
342	0.0007202	77	164	20	251
343	0.0008447	128	194	26	260
344	0.0009442	64	159	25	254
345	0.0008146	17	122	16	227
346	0.0009505	64	185	27	306
347	0.0008434	45	183	22	321
348	0.0007994	58	164	19	270
349	0.0008514	46	151	20	256
350	0.0007719	22	138	22	254
351	0.0008308	31	129	17	227
352	0.0007974	50	144	16	238
353	0.0008589	33	136	25	239
354	0.0008454	57	164	25	271
355	0.0010789	163	237	25	311
356	0.0009448	79	163	26	247
357	0.0008322	0	124	14	248
358	0.0008657	16	127	22	238
359	0.0009042	14	132	21	250
360	0.0008202	20	134	16	248
361	0.0009364	49	144	16	239
362	0.0009757	78	156	21	234
363	0.0009599	63	166	22	269
364	0.0010228	61	157	17	253
365	0.0009849	36	145	13	254
366	0.000786	48	145	16	242
367	0.0007919	64	162	21	260
368	0.0012776	17	141	22	265
369	0.0007475	72	162	24	252
370	0.0008886	30	149	18	268
371	0.0007434	19	136	17	253
372	0.0009476	29	158	17	287
373	0.0008669	39	135	27	231
374	0.000723	10	119	16	228
375	0.0009027	43	139	15	235
376	0.0009056	11	121	22	231
377	0.0024426	53	151	19	249
378	0.0008462	60	164	14	268
379	0.0007898	18	127	16	236
380	0.0010127	36	168	27	300
381	0.0009958	2	157	22	312
382	0.0010022	74	195	20	316
383	0.0008372	90	179	23	268
384	0.0024362	83	180	21	277
385	0.0008748	71	167	21	263
386	0.0007532	7	122	19	237
387	0.0008725	16	142	20	268
388	0.000803	8	123	20	238
389	0.0010269	5	142	25	279
390	0.0009657	21	163	18	305
391	0.0008803	59	135	13	211
392	0.0008616	56	152	21	248
393	0.0008723	14	131	25	248
394	0.0008489	3	117	15	231
395	0.0009033	12	140	17	268
396	0.0007651	7	129	18	251
397	0.0009098	29	137	16	245
398	0.0008408	71	174	20	277
399	0.0009597	81	178	24	275
400	0.0008432	55	163	16	271
401	0.0009104	66	167	23	268
402	0.001024	16	162	23	308
403	0.001003	23	154	24	285
404	0.001013	1	135	18	269
405	0.0009901	11	153	19	295
406	0.0009591	12	139	21	266
407	0.0008685	138	218	27	298
408	0.0009209	37	151	21	265
409	0.0008019	18	130	20	242
410	0.0007482	13	130	26	247
411	0.0007873	29	123	16	217
412	0.00082	9	130	17	251
413	0.0007917	118	200	25	282
414	0.0008762	8	135	15	262
415	0.0009492	1	119	14	237
416	0.0009153	40	151	15	262
417	0.000918	6	137	22	268
418	0.0008167	23	133	17	243
419	0.0008721	22	126	17	230
420	0.0007401	123	194	18	265
421	0.0009303	33	141	18	249
422	0.0009024	34	126	17	218
423	0.0008043	19	137	15	255
424	0.0010812	48	174	19	300
425	0.0008759	105	190	26	275
426	0.0010691	20	156	27	292
427	0.0011479	57	157	24	257
428	0.0008572	37	144	13	251
429	0.000877	20	132	24	244
430	0.0009463	8	138	23	268
431	0.0009576	56	158	20	260
432	0.0008714	40	138	14	236
433	0.0009889	91	169	21	247
434	0.000852	29	155	19	281
435	0.0008847	63	167	20	271
436	0.0009471	35	140	23	245
437	0.0009648	17	140	23	263
438	0.0008998	99	195	25	291
439	0.0009561	45	174	19	303
440	0.0008422	23	155	24	287
441	0.0008368	41	164	17	287
442	0.0009761	14	154	23	294
443	0.0009427	6	153	19	300
444	0.0011196	35	154	28	273
445	0.0009247	33	146	14	259
446	0.000764	19	132	18	245
447	0.0009199	33	146	17	259
448	0.0009534	1	124	20	247
449	0.0009042	22	160	21	298
450	0.0008425	75	182	29	289
451	0.000854	37	150	15	263
452	0.0008634	75	191	26	307
453	0.0007781	6	124	23	242
454	0.0010899	107	193	21	279
455	0.0009369	62	157	17	252
456	0.0009262	85	176	18	267
457	0.0008985	1	133	20	265
458	0.0008554	38	166	21	294
459	0.000939	59	168	17	277
460	0.0009474	79	163	16	247
461	0.0008167	78	158	17	238
462	0.0008401	38	151	20	264
463	0.0007736	28	136	16	244
464	0.0009503	0	127	19	254
465	0.0009044	64	153	22	242
466	0.0006831	55	157	15	259
467	0.0008987	13	135	20	257
468	0.0008125	10	128	22	246
469	0.0009642	79	181	21	283
470	0.0009558	35	141	16	247
471	0.0009247	67	169	26	271
472	0.0009239	19	160	23	301
473	0.0008963	36	139	17	242
474	0.000982	47	153	16	259
475	0.001015	12	148	24	284
476	0.0008461	4	124	22	244
477	0.0009623	44	164	27	284
478	0.0009288	21	149	23	277
479	0.0008614	5	123	26	241
480	0.0010307	3	129	21	255
481	0.0008981	39	155	15	271
482	0.0008221	15	139	21	263
483	0.0010901	20	157	17	294
484	0.0008321	13	128	16	243
485	0.0010594	47	158	23	269
486	0.0008303	12	131	24	250
487	0.0008677	48	170	25	292
488	0.0008206	83	157	28	231
489	0.0008336	24	148	23	272
490	0.0010116	44	163	21	282
491	0.000887	17	137	23	257
492	0.0008805	12	145	16	278
493	0.0007854	5	140	18	275
494	0.0008384	132	197	26	262
495	0.0008518	48	155	26	262
496	0.0009945	61	178	21	295
497	0.0008378	33	133	15	233
498	0.0009057	22	138	17	254
499	0.0008566	75	166	27	257
500	0.0006869	80	163	20	246
501	0.0007064	3	94	14	185
502	0.0009338	3	132	24	261
503	0.0009328	6	138	23	270
504	0.0007471	73	159	27	245
505	0.0009668	53	163	25	273
506	0.0009056	29	148	19	267
507	0.0010079	111	212	27	313
508	0.0010151	53	178	19	303
509	0.0008317	21	125	17	229
510	0.0009659	83	179	19	275
511	0.0007539	6	131	22	256
512	0.0009886	21	169	28	317
513	0.0008065	40	164	15	288
514	0.0009229	16	126	19	236
515	0.0009548	46	162	20	278
516	0.0009348	3	120	19	237
517	0.0007875	0	115	13	230
518	0.0008626	48	147	24	246
519	0.0009125	41	160	25	279
520	0.0007578	81	167	25	253
521	0.0007244	8	124	15	240
522	0.0007012	24	127	17	230
523	0.000862	110	170	20	230
524	0.0008282	4	117	15	230
525	0.0008483	97	156	15	215
526	0.000835	4	109	19	214
527	0.0008723	7	132	17	257
528	0.0008655	73	164	18	255
529	0.0010478	79	192	19	305
530	0.0009926	5	153	25	301
531	0.0007801	57	156	25	255
532	0.0008095	18	125	16	232
533	0.0008776	46	141	19	236
534	0.0008094	72	188	22	304
535	0.0008922	8	134	22	260
536	0.0009055	15	129	21	243
537	0.0008157	22	144	22	266
538	0.0008873	52	150	24	248
539	0.0008593	30	126	17	222
540	0.0008521	28	137	18	246
541	0.0010166	26	140	18	254
542	0.0009487	24	139	19	254
543	0.0009124	14	135	21	256
544	0.000806	41	139	21	237
545	0.0008552	23	154	12	285
546	0.0009179	17	159	21	301
547	0.0009711	84	189	23	294
548	0.0007955	20	135	18	250
549	0.0008469	3	118	16	233
550	0.0008306	41	129	18	217
551	0.000913	46	163	26	280
552	0.0008961	34	151	17	268
553	0.000918	54	154	23	254
554	0.00094	17	132	15	247
555	0.0009377	13	145	24	277
556	0.0008252	7	139	21	271
557	0.000844	102	177	25	252
558	0.0008702	22	164	20	306
559	0.000823	15	122	13	229
560	0.0009655	3	146	26	289
561	0.0008683	50	152	22	254
562	0.0008937	156	226	25	296
563	0.000767	65	164	15	263
564	0.0009801	42	150	28	258
565	0.0007604	16	112	19	208
566	0.0008049	37	152	15	267
567	0.0007163	23	114	15	205
568	0.000871	16	133	12	250
569	0.0010274	30	164	22	298
570	0.0008058	41	152	16	263
571	0.0008568	44	138	16	232
572	0.0008626	34	152	15	270
573	0.0009863	99	192	22	285
574	0.0008761	43	152	20	261
575	0.0009218	40	157	26	274
576	0.0008486	43	151	21	259
577	0.0008517	79	155	17	231
578	0.0009496	134	217	29	300
579	0.0008376	8	134	20	260
580	0.0010222	85	164	27	243
581	0.0009793	64	182	20	300
582	0.0009208	35	148	20	261
583	0.00083	19	133	17	247
584	0.0007849	50	155	21	260
585	0.0007956	26	141	23	256
586	0.0009142	167	234	25	301
587	0.0007972	16	128	13	240
588	0.0008477	10	129	26	248
589	0.0009223	20	132	23	244
590	0.0009824	50	142	20	234
591	0.0010184	4	135	23	266
592	0.0009469	72	170	28	268
593	0.0007391	20	131	16	242
594	0.0006696	55	139	15	223
595	0.0010149	25	164	25	303
596	0.0008999	115	189	18	263
597	0.0009157	27	151	16	275
598	0.0008064	48	155	26	262
599	0.0008697	44	146	24	248
600	0.0008554	15	139	21	263
601	0.0012158	15	151	27	287
602	0.0009564	40	142	20	244
603	0.0010504	57	169	24	281
604	0.0007345	78	151	18	224
605	0.0007096	15	128	17	241
606	0.0009445	17	144	25	271
607	0.0011058	49	158	18	267
608	0.0008552	33	152	20	271
609	0.0009819	55	166	22	277
610	0.00084	41	136	16	231
611	0.0008141	3	125	16	247
612	0.0008924	39	131	14	223
613	0.0009569	113	201	19	289
614	0.0009471	53	147	19	241
615	0.000841	31	154	23	277
616	0.0007465	19	136	13	253
617	0.0009619	33	152	17	271
618	0.0009558	96	175	19	254
619	0.0007815	13	113	17	213
620	0.000852	15	152	25	289
621	0.0009629	67	163	23	259
622	0.0008713	13	126	24	239
623	0.0007613	30	128	19	226
624	0.0009513	5	128	26	251
625	0.0009235	39	123	19	207
626	0.0009275	39	172	22	305
627	0.0008561	1	124	16	247
628	0.0008362	9	124	19	239
629	0.0009328	9	121	17	233
630	0.0007996	18	126	24	234
631	0.0007382	61	134	25	207
632	0.0010247	16	147	20	278
633	0.0008959	13	120	14	227
634	0.00099	84	184	22	284
635	0.000956	66	174	17	282
636	0.0008501	1	119	20	237
637	0.0009	20	145	19	270
638	0.0008782	21	120	18	219
639	0.0008799	6	123	21	240
640	0.0009379	43	152	26	261
641	0.0009811	56	171	15	286
642	0.0009405	28	145	18	262
643	0.0009076	116	187	22	258
644	0.0009391	30	127	21	224
645	0.0009742	117	191	28	265
646	0.0008627	4	135	21	266
647	0.0007902	4	122	22	240
648	0.000796	28	125	13	222
649	0.0010089	18	145	18	272
650	0.0009931	26	165	16	304
651	0.0011719	123	212	24	301
652	0.0008147	65	140	19	215
653	0.0008034	32	147	21	262
654	0.0008913	6	145	21	284
655	0.0009054	88	187	17	286
656	0.0009165	25	143	18	261
657	0.0009105	58	166	25	274
658	0.0010297	93	192	21	291
659	0.0007776	14	133	17	252
660	0.0010003	24	161	22	298
661	0.0008105	49	127	16	205
662	0.0010256	127	233	23	339
663	0.001098	114	205	22	296
664	0.0007328	15	127	17	239
665	0.0010288	21	142	24	263
666	0.0008589	10	149	23	288
667	0.0007269	15	104	16	193
668	0.0008617	8	139	14	270
669	0.0008143	14	151	17	288
670	0.0009121	25	145	19	265
671	0.0010107	193	252	25	311
672	0.0008248	36	140	24	244
673	0.0009645	54	167	16	280
674	0.0009815	34	136	19	238
675	0.0008423	3	135	23	267
676	0.0008594	25	129	20	233
677	0.000917	89	195	21	301
678	0.0008313	13	130	18	247
679	0.0008824	27	140	17	253
680	0.0009088	11	137	16	263
681	0.000831	23	124	19	225
682	0.0009213	27	152	18	277
683	0.0007466	5	132	16	259
684	0.000688	15	126	12	237
685	0.0008462	21	126	18	231
686	0.0013212	46	160	15	274
687	0.0008482	23	127	24	231
688	0.0008266	6	131	23	256
689	0.0008116	42	139	18	236
690	0.0010839	2	125	20	248
691	0.000933	44	153	21	262
692	0.0009151	37	144	18	251
693	0.0008359	31	156	26	281
694	0.0008167	55	166	25	277
695	0.000973	72	175	25	278
696	0.0008851	22	149	29	276
697	0.0008178	9	153	19	297
698	0.000783	67	175	15	283
699	0.0009353	56	176	16	296
700	0.000895	10	120	16	230
701	0.000825	30	135	23	240
702	0.0008916	20	132	23	244
703	0.0009323	172	235	19	298
704	0.0007686	9	147	23	285
705	0.0009251	0	143	20	286
706	0.000806	13	138	21	263
707	0.0008772	24	133	17	242
708	0.0009827	73	186	19	299
709	0.0007872	21	122	24	223
710	0.0009751	112	207	24	302
711	0.0010473	149	238	24	327
712	0.0009781	74	169	19	264
713	0.0009227	21	143	17	265
714	0.0008864	13	151	22	289
715	0.0009461	123	206	29	289
716	0.0010294	61	166	21	271
717	0.0007688	22	136	17	250
718	0.0010444	35	175	19	315
719	0.0010725	50	169	18	288
720	0.0008947	17	151	20	285
721	0.0008926	72	165	24	258
722	0.0008716	14	120	19	226
723	0.0008765	43	151	19	259
724	0.0011371	38	150	19	262
725	0.0008468	105	187	23	269
726	0.0009467	21	148	15	275
727	0.0007632	7	121	17	235
728	0.0008507	29	154	26	279
729	0.0007147	17	140	15	263
730	0.0008738	63	162	26	261
731	0.0008497	5	130	26	255
732	0.0007586	38	131	17	224
733	0.0008375	54	171	26	288
734	0.0008606	17	132	22	247
735	0.000955	43	150	16	257
736	0.0009792	154	209	23	264
737	0.0009716	8	152	27	296
738	0.0009717	31	136	22	241
739	0.0010029	23	149	17	275
740	0.0009081	51	150	20	249
741	0.0009227	7	136	18	265
742	0.0010156	40	136	18	232
743	0.0009173	22	160	23	298
744	0.0009014	32	164	19	296
745	0.0009655	20	122	24	224
746	0.0007512	222	254	28	286
747	0.0009278	25	136	25	247
748	0.0007928	43	159	23	275
749	0.0007885	20	141	21	262
750	0.0009123	26	147	26	268
751	0.0009272	28	160	19	292
752	0.0009515	15	130	19	245
753	0.0008787	45	153	19	261
754	0.0009108	34	140	13	246
755	0.0007647	23	125	18	227
756	0.0009065	50	159	18	268
757	0.0009604	123	209	21	295
758	0.0010258	51	167	22	283
759	0.0010617	3	156	20	309
760	0.000775	13	130	20	247
761	0.0008631	6	118	18	230
762	0.0008915	97	176	16	255
763	0.0008599	39	150	23	261
764	0.0008849	53	161	23	269
765	0.0009108	21	142	23	263
766	0.0008481	49	145	15	241
767	0.0008724	95	180	18	265
768	0.0008866	33	149	16	265
769	0.0008109	14	134	20	254
770	0.0009619	143	208	24	273
771	0.0008043	8	134	20	260
772	0.0009747	33	119	16	205
773	0.0009749	61	139	24	217
774	0.000781	3	123	26	243
775	0.0007856	11	131	21	251
776	0.0008403	72	157	23	242
777	0.0007947	66	160	24	254
778	0.0008458	14	121	26	228
779	0.0008034	17	125	14	233
780	0.0007999	72	169	15	266
781	0.0007902	39	142	18	245
782	0.0009185	56	177	22	298
783	0.0008461	9	123	19	237
784	0.0008144	16	129	17	242
785	0.0009811	48	183	21	318
786	0.0008596	5	119	19	233
787	0.0008232	11	123	20	235
788	0.0009951	24	135	19	246
789	0.000939	86	177	25	268
790	0.0008028	57	137	17	217
791	0.0008651	21	145	23	269
792	0.000845	56	148	16	240
793	0.00086	53	160	20	267
794	0.0008479	39	147	18	255
795	0.0008633	67	171	20	275
796	0.001027	41	145	19	249
797	0.0010959	50	167	22	284
798	0.0009003	33	142	17	251
799	0.0008561	13	125	21	237
800	0.0008555	28	150	19	272
801	0.0008909	178	242	23	306
802	0.0009222	81	181	24	281
803	0.0008686	35	166	18	297
804	0.0008565	63	170	28	277
805	0.0010147	53	172	21	291
806	0.0008098	25	143	19	261
807	0.0008792	102	191	25	280
808	0.000948	92	140	17	188
809	0.0007025	174	236	29	298
810	0.0009613	36	158	28	280
811	0.000759	7	114	17	221
812	0.0007523	24	115	14	206
813	0.0007744	1	126	24	251
814	0.0008179	32	143	16	254
815	0.0008067	4	108	19	212
816	0.0009464	53	157	28	261
817	0.0008735	26	142	24	258
818	0.0010389	81	182	24	283
819	0.000943	5	135	28	265
820	0.0009888	32	149	24	266
821	0.0009012	64	181	19	298
822	0.0007785	118	171	19	224
823	0.0010928	12	124	16	236
824	0.0007934	46	156	20	266
825	0.0009098	25	153	16	281
826	0.0008622	63	178	24	293
827	0.0009054	8	97	26	186
828	0.0007571	129	198	21	267
829	0.0009166	32	136	26	240
830	0.0008854	26	157	28	288
831	0.0008474	60	157	14	254
832	0.0010918	45	141	19	237
833	0.000869	15	130	13	245
834	0.0009967	101	183	27	265
835	0.0007698	8	113	12	218
836	0.0009878	97	191	23	285
837	0.0008726	31	136	18	241
838	0.0009199	39	175	23	311
839	0.0009756	6	152	20	298
840	0.0008525	17	154	29	291
841	0.0009426	36	141	29	246
842	0.0008798	53	145	18	237
843	0.0008977	27	150	17	273
844	0.0007527	7	123	17	239
845	0.0009709	20	158	25	296
846	0.0008542	24	149	14	274
847	0.0008819	66	153	19	240
848	0.0009444	54	155	24	256
849	0.0008519	12	116	21	220
850	0.0009042	34	153	18	272
851	0.0008833	70	177	20	284
852	0.0008285	10	128	21	246
853	0.0008456	26	139	28	252
854	0.0009346	110	200	22	290
855	0.0009866	200	265	22	330
856	0.0009514	137	202	25	267
857	0.0008315	41	130	28	219
858	0.0008438	36	147	23	258
859	0.0008148	2	133	25	264
860	0.0009051	33	154	15	275
861	0.0007217	41	134	14	227
862	0.0007443	15	142	21	269
863	0.000847	25	139	26	253
864	0.0009363	59	171	17	283
865	0.0008615	61	155	16	249
866	0.0008914	4	124	15	244
867	0.001018	44	175	22	306
868	0.0008859	46	154	19	262
869	0.0008237	95	177	21	259
870	0.0010332	22	146	23	270
871	0.0008343	81	179	25	277
872	0.0010866	45	137	22	229
873	0.0009556	26	141	13	256
874	0.0009565	34	160	26	286
875	0.0009166	39	150	17	261
876	0.0008502	26	157	23	288
877	0.0009496	78	190	25	302
878	0.0007511	8	127	19	246
879	0.0008438	16	131	18	246
880	0.0008623	13	134	19	255
881	0.0009301	8	123	26	238
882	0.0008334	6	130	16	254
883	0.0008025	1	141	28	281
884	0.0008024	5	102	12	199
885	0.0008344	28	150	14	272
886	0.0008799	5	107	23	209
887	0.0008602	2	147	22	292
888	0.000884	5	136	20	267
889	0.0008943	18	137	22	256
890	0.0008275	44	139	16	234
891	0.0010515	23	155	17	287
892	0.0008186	26	140	17	254
893	0.0007341	19	124	19	229
894	0.0008283	82	154	17	226
895	0.0008694	11	132	18	253
896	0.000744	10	106	15	202
897	0.0008147	0	129	21	258
898	0.0008319	63	172	20	281
899	0.0008245	27	144	18	261
900	0.0009435	50	155	15	260
901	0.0009539	38	146	25	254
902	0.0008123	14	125	21	236
903	0.0007977	11	116	17	221
904	0.0008759	8	134	24	260
905	0.0009213	4	127	22	250
906	0.0009607	62	180	22	298
907	0.0008201	14	133	22	252
908	0.000828	43	131	20	219
909	0.0009497	64	172	16	280
910	0.0009088	38	164	21	290
911	0.0008359	15	141	15	267
912	0.0008278	69	154	20	239
913	0.00083	42	154	16	266
914	0.0009954	40	174	20	308
915	0.0008797	3	125	16	247
916	0.0011211	35	144	20	253
917	0.0008665	103	183	23	263
918	0.0008611	17	141	25	265
919	0.0008884	18	133	22	248
920	0.0008567	61	149	24	237
921	0.0009645	2	146	18	290
922	0.0008867	4	146	19	288
923	0.0010411	42	155	16	268
924	0.00108	42	158	23	274
925	0.0010058	14	134	24	254
926	0.0008775	20	140	17	260
927	0.0009226	8	126	22	244
928	0.0007734	50	164	25	278
929	0.0009114	5	149	17	293
930	0.0009027	7	137	17	267
931	0.0009769	79	171	19	263
932	0.0008994	10	143	18	276
933	0.0008473	2	130	13	258
934	0.0007998	32	141	22	250
935	0.0009509	188	243	29	298
936	0.0008193	13	117	16	221
937	0.0008519	32	146	17	260
938	0.0008636	17	146	20	275
939	0.0009326	67	193	22	319
940	0.0010396	76	176	22	276
941	0.0009231	74	197	22	320
942	0.0011046	87	174	24	261
943	0.0008061	34	124	14	214
944	0.0009577	26	143	24	260
945	0.0007948	64	168	22	272
946	0.0009065	26	129	18	232
947	0.0009524	49	154	18	259
948	0.0007846	70	167	20	264
949	0.0007607	15	129	19	243
950	0.0008951	26	154	18	282
951	0.0008744	44	135	18	226
952	0.0009775	62	162	16	262
953	0.0008798	38	171	19	304
954	0.0009857	59	165	23	271
955	0.0007866	34	142	14	250
956	0.0007953	54	169	26	284
957	0.0007727	44	143	23	242
958	0.0008363	83	157	25	231
959	0.0009754	19	163	23	307
960	0.0006992	16	119	16	222
961	0.0009453	92	189	20	286
962	0.0008402	34	137	16	240
963	0.0008377	41	171	20	301
964	0.0008208	5	140	19	275
965	0.0008251	30	126	14	222
966	0.0007395	45	148	23	251
967	0.0009218	86	171	16	256
968	0.0009089	58	166	19	274
969	0.0009097	50	155	17	260
970	0.000888	0	137	27	274
971	0.0008956	21	143	16	265
972	0.0009195	7	135	16	263
973	0.0008616	17	127	18	237
974	0.0007727	17	138	16	259
975	0.0008949	60	163	21	266
976	0.00086	21	140	20	259
977	0.0009656	56	175	28	294
978	0.0008894	74	173	20	272
979	0.0008127	24	135	16	246
980	0.0009133	18	151	18	284
981	0.0008659	42	155	22	268
982	0.000931	56	151	26	246
983	0.0009315	13	133	23	253
984	0.0008307	4	144	25	284
985	0.001268	25	155	27	285
986	0.000886	36	153	20	270
987	0.0009067	20	143	17	266
988	0.00091	6	146	22	286
989	0.0010185	132	196	18	260
990	0.0008566	14	130	21	246
991	0.0008102	3	133	28	263
992	0.0008669	21	137	20	253
993	0.0009822	110	203	24	296
994	0.0008486	31	140	22	249
995	0.000754	32	131	14	230
996	0.0008414	23	144	19	265
997	0.0008234	2	134	17	266
998	0.0007103	6	108	15	210
999	0.0009852	2	134	15	266
mean	0.00089365	40.871	150.711	20.184	260.551

## Sheet: PowerBalance_SEq
	time	SEq	Bal	Reg	Egal
0	0.0007653	36	149	17	262
1	0.0007447	17	148	18	279
2	0.0007165	10	116	18	222
3	0.0005066	6	119	16	232
4	0.0007414	31	162	18	293
5	0.0007331	38	127	16	216
6	0.000536	4	140	24	276
7	0.0004492	1	98	17	195
8	0.0007522	37	137	20	237
9	0.000516	10	128	18	246
10	0.0007444	26	141	18	256
11	0.0007624	16	145	21	274
12	0.00054	14	141	18	268
13	0.0007765	16	149	22	282
14	0.0006208	11	131	21	251
15	0.0008095	51	165	19	279
16	0.0007608	19	149	19	279
17	0.0007289	6	138	27	270
18	0.0005075	1	138	21	275
19	0.00052	0	133	19	266
20	0.0005984	0	140	22	280
21	0.0005622	5	128	17	251
22	0.0007573	15	122	19	229
23	0.0007634	52	160	18	268
24	0.0007465	2	136	19	270
25	0.0004874	3	119	13	235
26	0.0007356	21	129	16	237
27	0.0004201	5	114	14	223
28	0.0005023	14	125	25	236
29	0.0007437	25	148	20	271
30	0.0007361	7	125	18	243
31	0.0007957	13	142	15	271
32	0.0007739	12	136	21	260
33	0.0008492	5	124	15	243
34	0.0007564	9	131	17	253
35	0.0008412	36	150	20	264
36	0.0007576	26	129	21	232
37	0.0007541	13	134	25	255
38	0.0007404	20	124	17	228
39	0.0007728	61	161	25	261
40	0.0007735	15	151	23	287
41	0.0007476	11	134	18	257
42	0.0007201	23	113	12	203
43	0.000544	13	145	21	277
44	0.000541	20	132	29	244
45	0.0005556	7	128	16	249
46	0.0007504	5	132	15	259
47	0.0007592	18	145	17	272
48	0.0008338	23	150	29	277
49	0.0007848	17	137	16	257
50	0.000727	18	121	15	224
51	0.0006549	22	131	17	240
52	0.0007565	23	153	18	283
53	0.0007657	28	159	22	290
54	0.0007965	20	119	21	218
55	0.00077	45	148	18	251
56	0.0007753	15	118	17	221
57	0.0008136	14	138	21	262
58	0.0007354	24	151	29	278
59	0.0007502	21	141	14	261
60	0.0007761	29	130	18	231
61	0.0004925	13	141	17	269
62	0.0007286	12	132	18	252
63	0.0007523	21	151	17	281
64	0.0007446	24	130	19	236
65	0.0011634	22	144	16	266
66	0.0005222	10	132	18	254
67	0.0007962	37	150	17	263
68	0.0007557	13	132	22	251
69	0.0007658	44	154	22	264
70	0.0006355	18	135	19	252
71	0.0007632	31	140	27	249
72	0.0007663	20	126	20	232
73	0.0004986	5	131	17	257
74	0.0007515	12	159	23	306
75	0.0007398	17	140	23	263
76	0.0005944	5	130	18	255
77	0.0005633	7	139	20	271
78	0.0007483	16	161	17	306
79	0.0005821	8	121	21	234
80	0.0008002	18	152	20	286
81	0.0007098	25	143	23	261
82	0.0007554	13	159	16	305
83	0.0007724	28	148	23	268
84	0.0005546	5	114	16	223
85	0.0007238	23	139	23	255
86	0.0008446	46	133	12	220
87	0.0005616	2	115	24	228
88	0.0007984	45	184	24	323
89	0.0007794	13	129	20	245
90	0.0007299	33	150	19	267
91	0.000548	8	123	19	238
92	0.0007338	24	127	22	230
93	0.0007698	21	138	20	255
94	0.0007384	9	140	17	271
95	0.0007548	41	136	14	231
96	0.0005307	25	139	20	253
97	0.0007561	12	159	27	306
98	0.0007517	39	160	27	281
99	0.0005999	13	137	14	261
100	0.0007623	3	127	19	251
101	0.0007735	13	121	17	229
102	0.0005333	1	111	23	221
103	0.0007563	10	133	21	256
104	0.000796	2	137	18	272
105	0.0007383	17	159	28	301
106	0.0008488	11	149	18	287
107	0.0007547	24	156	25	288
108	0.0007308	21	137	22	253
109	0.0005224	10	116	13	222
110	0.0008289	16	135	17	254
111	0.0007494	41	139	18	237
112	0.0007543	26	147	20	268
113	0.0008	41	159	20	277
114	0.000605	3	126	22	249
115	0.0007864	24	134	25	244
116	0.0006195	3	127	20	251
117	0.000659	20	128	16	236
118	0.0007709	37	155	24	273
119	0.00063	5	123	20	241
120	0.0007471	28	148	18	268
121	0.0004518	10	133	23	256
122	0.0007774	21	112	19	203
123	0.0008079	33	123	19	213
124	0.000788	16	128	15	240
125	0.0007152	15	134	24	253
126	0.0004484	4	122	23	240
127	0.0005981	8	139	17	270
128	0.000774	17	143	26	269
129	0.0007497	21	142	21	263
130	0.0007438	22	129	18	236
131	0.0006971	58	149	18	240
132	0.0005843	7	118	21	229
133	0.00048	5	107	16	209
134	0.0008038	27	132	17	237
135	0.0005838	13	139	20	265
136	0.0007361	19	144	19	269
137	0.0007653	30	144	12	258
138	0.0005193	3	135	19	267
139	0.0008057	47	155	17	263
140	0.0007514	18	141	28	264
141	0.0007365	26	150	17	274
142	0.0007607	15	151	21	287
143	0.0009974	30	168	25	306
144	0.0005867	10	126	21	242
145	0.0007525	26	146	26	266
146	0.0007058	26	131	23	236
147	0.0007556	15	133	17	251
148	0.0005522	15	130	18	245
149	0.0008247	11	148	16	285
150	0.0007463	10	145	23	280
151	0.0007111	20	139	23	258
152	0.0007564	28	144	18	260
153	0.0007622	12	122	18	232
154	0.0007157	2	123	24	244
155	0.0007545	18	137	26	256
156	0.0007386	48	156	23	264
157	0.0007116	5	131	15	257
158	0.0007982	44	143	22	242
159	0.0007676	47	165	21	283
160	0.0007852	1	118	15	235
161	0.0007293	13	164	27	315
162	0.0007164	19	131	14	243
163	0.0006183	13	131	17	249
164	0.0007308	23	135	22	247
165	0.0007707	13	142	20	271
166	0.000638	11	131	26	251
167	0.0005994	11	129	21	247
168	0.0008136	18	132	19	246
169	0.0007706	16	132	21	248
170	0.0007709	31	124	25	217
171	0.0007463	9	130	17	251
172	0.0007401	29	135	12	241
173	0.0006535	14	131	16	248
174	0.0008106	16	148	23	280
175	0.0007568	26	140	20	254
176	0.0004976	0	132	17	264
177	0.0005154	2	130	16	258
178	0.0005474	1	137	16	273
179	0.0007946	39	152	23	265
180	0.0007958	8	146	16	284
181	0.0008214	15	132	16	249
182	0.0007418	6	131	29	256
183	0.0007915	17	130	20	243
184	0.0007391	45	159	17	273
185	0.0007484	58	165	23	272
186	0.0005329	4	147	19	290
187	0.0007154	17	141	24	265
188	0.0006227	8	144	17	280
189	0.0007326	26	154	13	282
190	0.0007426	12	148	14	284
191	0.0007903	28	121	18	214
192	0.0006251	19	149	26	279
193	0.0007735	53	174	29	295
194	0.0007544	6	131	14	256
195	0.0006646	1	127	24	253
196	0.0006655	10	139	17	268
197	0.0004784	4	128	16	252
198	0.0007316	44	137	25	230
199	0.00076	33	168	19	303
200	0.0005829	5	139	22	273
201	0.0007475	26	152	25	278
202	0.0007681	14	160	24	306
203	0.0008952	41	163	18	285
204	0.0007142	7	125	16	243
205	0.0007723	22	146	18	270
206	0.0004352	5	108	13	211
207	0.0007766	20	134	15	248
208	0.0007997	16	138	20	260
209	0.000712	23	117	13	211
210	0.0007739	23	149	20	275
211	0.0007426	51	186	27	321
212	0.0005997	11	134	16	257
213	0.0004723	9	116	17	223
214	0.0006076	12	133	20	254
215	0.000738	20	135	17	250
216	0.0007106	6	130	27	254
217	0.000511	13	125	24	237
218	0.0008181	14	139	18	264
219	0.0007664	55	153	22	251
220	0.0005073	5	133	17	261
221	0.0007344	9	143	16	277
222	0.0008355	32	144	26	256
223	0.0005246	5	146	17	287
224	0.0008014	15	131	21	247
225	0.000636	10	131	19	252
226	0.0007804	20	149	20	278
227	0.000748	12	145	18	278
228	0.0007382	21	155	24	289
229	0.0004447	5	136	20	267
230	0.0008021	30	150	21	270
231	0.0006056	3	122	17	241
232	0.0007378	16	151	22	286
233	0.0005628	10	142	21	274
234	0.0007446	11	121	17	231
235	0.0007426	14	124	19	234
236	0.0007421	22	139	23	256
237	0.0008313	18	166	17	314
238	0.0008068	22	145	26	268
239	0.000533	4	132	18	260
240	0.0005127	8	133	21	258
241	0.0007631	39	147	28	255
242	0.0007481	13	149	15	285
243	0.0005817	19	125	20	231
244	0.0007613	52	167	20	282
245	0.0005513	7	125	18	243
246	0.000764	25	172	22	319
247	0.0007352	25	142	15	259
248	0.0007577	18	141	28	264
249	0.00055	4	148	27	292
250	0.0007937	7	126	27	245
251	0.0007312	9	128	17	247
252	0.0007499	5	144	22	283
253	0.0007333	29	141	17	253
254	0.0005531	12	140	17	268
255	0.0007485	6	148	21	290
256	0.0007749	19	155	15	291
257	0.000728	12	127	24	242
258	0.0008226	20	122	21	224
259	0.0007006	2	114	14	226
260	0.0007512	42	175	17	308
261	0.0007417	31	147	18	263
262	0.0006341	21	122	15	223
263	0.0004843	0	129	22	258
264	0.0007262	22	125	25	228
265	0.00066	6	142	17	278
266	0.0007486	35	161	20	287
267	0.000589	2	129	24	256
268	0.0007941	20	141	23	262
269	0.0007579	91	173	17	255
270	0.0005737	0	138	18	276
271	0.0007876	7	156	18	305
272	0.000746	14	141	23	268
273	0.0007752	20	141	19	262
274	0.0008178	18	137	18	256
275	0.0005197	16	134	15	252
276	0.0007626	15	143	18	271
277	0.0004932	6	116	20	226
278	0.0007261	13	115	15	217
279	0.0007903	25	157	20	289
280	0.0006058	1	111	16	221
281	0.0006107	10	154	23	298
282	0.0004636	5	135	17	265
283	0.0007586	44	155	18	266
284	0.0007725	19	131	15	243
285	0.0007463	15	158	14	301
286	0.0006267	3	122	14	241
287	0.0007579	33	157	15	281
288	0.0007767	45	156	20	267
289	0.0007505	18	157	17	296
290	0.0006171	3	143	18	283
291	0.0007303	36	146	25	256
292	0.0007344	33	142	20	251
293	0.0007415	13	137	14	261
294	0.0007359	28	147	22	266
295	0.0005417	5	134	15	263
296	0.0007662	9	142	22	275
297	0.0007583	15	149	19	283
298	0.0004935	3	135	22	267
299	0.0006537	5	144	21	283
300	0.0004717	2	126	17	250
301	0.0007979	55	158	21	261
302	0.0007156	3	141	24	279
303	0.0005224	3	128	18	253
304	0.0008079	9	132	20	255
305	0.0007493	22	110	13	198
306	0.0005512	8	113	15	218
307	0.0007455	32	154	17	276
308	0.0004307	7	111	16	215
309	0.0008288	0	130	22	260
310	0.0007117	26	145	18	264
311	0.0006044	12	129	15	246
312	0.0007156	13	138	23	263
313	0.0007148	15	138	26	261
314	0.0011156	57	152	27	247
315	0.000894	12	118	15	224
316	0.0005751	41	135	16	229
317	0.000647	8	115	20	222
318	0.0007814	11	121	15	231
319	0.0005815	9	136	18	263
320	0.0004506	2	115	18	228
321	0.0007227	13	121	22	229
322	0.0007146	19	130	25	241
323	0.0007658	29	142	22	255
324	0.0005032	1	122	23	243
325	0.0007871	15	149	25	283
326	0.0005043	2	132	17	262
327	0.0007816	20	128	16	236
328	0.0005943	5	151	20	297
329	0.0005583	5	124	19	243
330	0.0006837	12	144	18	276
331	0.0007319	1	132	18	263
332	0.0009057	25	135	14	245
333	0.000737	21	116	27	211
334	0.0007632	19	154	14	289
335	0.0005651	14	133	19	252
336	0.0008403	23	156	17	289
337	0.0007715	34	127	25	220
338	0.0005921	14	145	27	276
339	0.0007381	1	133	22	265
340	0.0007982	44	157	28	270
341	0.0007529	39	166	21	293
342	0.0007751	14	133	15	252
343	0.0004931	9	113	13	217
344	0.0007435	64	159	25	254
345	0.0007286	17	122	16	227
346	0.0007795	6	149	19	292
347	0.0007336	45	183	22	321
348	0.0007379	39	157	19	275
349	0.0007494	23	140	19	257
350	0.000777	19	132	21	245
351	0.0005543	15	124	17	233
352	0.000436	12	127	14	242
353	0.0007264	33	150	24	267
354	0.0007537	27	149	23	271
355	0.0005363	5	139	23	273
356	0.0004452	2	114	22	226
357	0.0005609	0	124	14	248
358	0.0007525	16	127	22	238
359	0.0007425	67	171	26	275
360	0.0005032	20	134	16	248
361	0.0004962	3	123	17	243
362	0.0007202	12	123	21	234
363	0.0007622	28	142	23	256
364	0.0005793	6	126	17	246
365	0.0007596	6	130	14	254
366	0.0007169	22	126	16	230
367	0.0007536	27	131	18	235
368	0.0007469	17	141	22	265
369	0.0007738	8	141	20	274
370	0.0007644	21	145	18	269
371	0.0006903	18	132	19	246
372	0.0007766	33	153	17	273
373	0.0007479	20	132	27	244
374	0.0007147	9	118	13	227
375	0.0008729	7	134	15	261
376	0.0005681	11	121	22	231
377	0.0007566	18	142	22	266
378	0.0008115	13	141	18	269
379	0.0007199	18	127	16	236
380	0.0007641	63	176	23	289
381	0.0006729	2	157	22	312
382	0.0006594	8	157	21	306
383	0.0005945	10	142	20	274
384	0.000731	38	158	26	278
385	0.0009044	38	173	23	308
386	0.0009109	18	122	26	226
387	0.0005275	5	135	20	265
388	0.0008345	8	123	20	238
389	0.000765	48	162	25	276
390	0.0006748	4	152	17	300
391	0.0007886	47	133	13	219
392	0.0007523	9	130	21	251
393	0.000848	14	131	25	248
394	0.0007271	18	127	15	236
395	0.0007277	12	140	17	268
396	0.0004848	7	129	18	251
397	0.0005265	3	126	16	249
398	0.0007792	23	154	26	285
399	0.0005591	2	149	25	296
400	0.000809	28	142	16	256
401	0.0007232	17	148	23	279
402	0.0007513	16	162	23	308
403	0.0007858	23	154	24	285
404	0.0005978	1	135	18	269
405	0.0005938	11	153	19	295
406	0.0007603	12	139	21	266
407	0.0008134	18	142	21	266
408	0.0007397	12	128	21	244
409	0.0004904	18	130	20	242
410	0.0007402	13	130	26	247
411	0.0007528	21	119	16	217
412	0.0007364	9	130	17	251
413	0.0007623	48	159	21	270
414	0.0004408	8	135	15	262
415	0.0007379	15	119	17	223
416	0.0004583	1	127	15	253
417	0.0006235	6	137	22	268
418	0.0004815	9	126	17	243
419	0.0007846	20	128	25	236
420	0.0007019	5	126	17	247
421	0.0007018	7	135	17	263
422	0.0005125	13	114	15	215
423	0.0007408	10	133	15	256
424	0.0007906	12	161	19	310
425	0.0007389	12	137	24	262
426	0.0006326	20	156	27	292
427	0.0007664	30	136	28	242
428	0.0007516	37	144	13	251
429	0.0007433	47	146	24	245
430	0.0006112	8	138	23	268
431	0.0007394	32	131	15	230
432	0.0008631	25	144	27	263
433	0.0007686	9	132	21	255
434	0.0007889	18	150	19	282
435	0.000868	42	154	20	266
436	0.0008467	20	129	23	238
437	0.0007568	17	140	23	263
438	0.0006441	1	151	19	301
439	0.0007662	38	173	29	308
440	0.0007827	13	151	22	289
441	0.0007464	15	157	20	299
442	0.0007624	14	154	23	294
443	0.0007379	6	153	19	300
444	0.0007576	78	157	18	236
445	0.0007393	10	149	26	288
446	0.0007909	19	132	18	245
447	0.0007431	33	146	17	259
448	0.0007501	18	129	20	240
449	0.0007512	22	160	21	298
450	0.0005815	6	129	29	252
451	0.0006355	20	143	15	266
452	0.0007926	46	160	17	274
453	0.0007525	44	152	22	260
454	0.0007819	14	132	13	250
455	0.000774	33	147	18	261
456	0.0007359	13	134	14	255
457	0.0004576	1	133	20	265
458	0.0005086	3	145	26	287
459	0.0008328	24	146	24	268
460	0.0005117	16	127	16	238
461	0.0004678	4	121	17	238
462	0.0007481	38	151	20	264
463	0.0007255	19	135	29	251
464	0.0005653	0	127	19	254
465	0.0006182	2	126	29	250
466	0.000622	4	137	23	270
467	0.0007835	30	135	17	240
468	0.0007331	10	128	22	246
469	0.0007535	12	148	21	284
470	0.000756	24	137	16	250
471	0.0005741	2	128	20	254
472	0.0007511	19	160	23	301
473	0.0007585	19	134	19	249
474	0.0007328	4	133	21	262
475	0.0007611	12	148	24	284
476	0.0004636	4	124	22	244
477	0.0011056	31	156	16	281
478	0.0005013	3	134	23	265
479	0.0007468	5	123	26	241
480	0.0005217	3	129	21	255
481	0.0005742	10	132	15	254
482	0.0007415	15	139	21	263
483	0.0008243	20	157	17	294
484	0.0008542	13	128	16	243
485	0.0007463	47	158	23	269
486	0.0007261	12	131	24	250
487	0.0007287	32	160	25	288
488	0.0007399	24	116	23	208
489	0.0007614	24	148	23	272
490	0.0005644	28	159	21	290
491	0.0006543	17	137	23	257
492	0.0007616	78	182	16	286
493	0.0008439	12	134	18	256
494	0.0007445	17	127	17	237
495	0.0006292	1	130	26	259
496	0.0007524	9	151	24	293
497	0.0007301	8	124	18	240
498	0.0007362	22	138	17	254
499	0.0006148	13	135	27	257
500	0.0005805	29	119	20	209
501	0.0004145	3	94	14	185
502	0.0008005	58	167	23	276
503	0.000598	6	138	23	270
504	0.0005949	5	133	19	261
505	0.0007286	16	140	20	264
506	0.0006711	29	148	19	267
507	0.0006153	0	142	18	284
508	0.0007923	53	178	19	303
509	0.0005473	21	125	17	229
510	0.0007456	30	159	18	288
511	0.0004771	8	135	22	262
512	0.0007374	36	173	28	310
513	0.0007721	27	155	18	283
514	0.0007512	16	126	19	236
515	0.0007739	24	155	17	286
516	0.0005984	3	120	19	237
517	0.0005272	0	115	13	230
518	0.0007659	48	147	24	246
519	0.0005805	41	160	25	279
520	0.0005424	4	117	17	230
521	0.0006619	8	124	15	240
522	0.0007027	24	127	17	230
523	0.000622	2	118	27	234
524	0.000531	4	117	15	230
525	0.0007299	32	129	16	226
526	0.0005623	4	109	19	214
527	0.0007341	7	132	17	257
528	0.0005795	73	164	18	255
529	0.0005889	5	146	19	287
530	0.0005245	11	148	17	285
531	0.0007437	8	138	25	268
532	0.0007074	18	125	16	232
533	0.0006254	0	127	19	254
534	0.0006209	4	135	21	266
535	0.0007658	72	170	27	268
536	0.0007357	25	143	19	261
537	0.0007871	22	144	22	266
538	0.0007442	11	126	24	241
539	0.0007518	10	117	17	224
540	0.0005453	9	124	13	239
541	0.0004456	1	120	19	239
542	0.0007382	24	139	19	254
543	0.000579	5	129	21	253
544	0.0007616	41	139	21	237
545	0.0007499	9	149	13	289
546	0.0007469	17	159	21	301
547	0.0008266	39	133	16	227
548	0.0007491	20	135	18	250
549	0.0005152	3	118	16	233
550	0.0007348	27	126	19	225
551	0.0007732	46	163	26	280
552	0.0005519	5	137	19	269
553	0.0006167	11	123	18	235
554	0.0007803	17	132	15	247
555	0.0007381	13	145	24	277
556	0.0006161	3	134	21	265
557	0.0005721	33	128	19	223
558	0.0007404	19	166	20	313
559	0.0007506	15	122	13	229
560	0.0006929	3	146	26	289
561	0.00077	32	146	22	260
562	0.0005728	9	127	24	245
563	0.00076	0	140	26	280
564	0.0007765	42	150	28	258
565	0.0007355	16	112	19	208
566	0.0008049	10	135	13	260
567	0.000728	23	114	15	205
568	0.0007811	9	127	14	245
569	0.0006588	30	164	22	298
570	0.0005422	1	130	17	259
571	0.0007343	23	121	16	219
572	0.0007462	29	151	20	273
573	0.0007738	46	168	25	290
574	0.0004607	6	136	20	266
575	0.0006177	6	128	19	250
576	0.0007174	9	136	20	263
577	0.0005851	0	121	19	242
578	0.0007575	5	133	21	261
579	0.0005086	8	134	20	260
580	0.0007393	21	124	18	227
581	0.0007686	16	157	20	298
582	0.0007452	17	138	18	259
583	0.0005611	3	123	17	243
584	0.0007249	7	129	16	251
585	0.0006178	13	126	27	239
586	0.0007336	58	175	20	292
587	0.0005233	16	128	13	240
588	0.0007105	10	129	26	248
589	0.0007455	20	132	23	244
590	0.0007382	50	142	20	234
591	0.0007738	44	140	21	236
592	0.0007486	20	136	24	252
593	0.0007073	4	122	16	240
594	0.0004541	15	120	18	225
595	0.0006046	10	154	25	298
596	0.0008459	53	169	26	285
597	0.0004929	4	138	16	272
598	0.0005597	48	155	26	262
599	0.0007424	44	146	24	248
600	0.0007215	15	139	21	263
601	0.0007662	29	163	27	297
602	0.0007522	40	142	20	244
603	0.0007771	29	161	20	293
604	0.0007095	28	127	23	226
605	0.0004728	15	128	17	241
606	0.0005224	12	141	19	270
607	0.0005773	11	146	18	281
608	0.0007595	33	152	20	271
609	0.0007176	12	140	22	268
610	0.000588	3	127	26	251
611	0.0005927	3	125	16	247
612	0.0004728	7	120	18	233
613	0.0007686	26	153	16	280
614	0.0007319	23	136	28	249
615	0.0007673	31	154	23	277
616	0.0007348	15	135	23	255
617	0.0006275	2	128	17	254
618	0.0007408	29	154	28	279
619	0.0007505	13	113	17	213
620	0.0007526	45	165	25	285
621	0.0007862	67	163	23	259
622	0.0007411	13	126	24	239
623	0.0007362	12	123	19	234
624	0.0007537	34	143	26	252
625	0.0008037	39	123	19	207
626	0.0006016	1	147	20	293
627	0.0006304	1	124	16	247
628	0.0006702	9	124	19	239
629	0.0006419	9	121	17	233
630	0.0005059	18	126	24	234
631	0.000644	10	113	19	216
632	0.0006143	16	147	20	278
633	0.0006853	13	120	14	227
634	0.0007719	71	186	22	301
635	0.0007496	20	152	17	284
636	0.0006135	20	126	20	232
637	0.0008164	20	145	19	270
638	0.0007538	38	123	18	208
639	0.0007509	6	123	21	240
640	0.0006437	4	120	17	236
641	0.0007828	23	155	23	287
642	0.0006479	5	134	28	263
643	0.0008005	12	119	22	226
644	0.000777	25	127	17	229
645	0.0007581	44	142	23	240
646	0.0005605	4	135	21	266
647	0.0007128	12	123	21	234
648	0.0007268	2	119	16	236
649	0.0007649	18	145	18	272
650	0.000801	15	165	18	315
651	0.0007674	19	154	23	289
652	0.0005055	7	123	18	239
653	0.0007511	10	128	21	246
654	0.0005862	6	145	21	284
655	0.00078	65	182	19	299
656	0.0007764	25	143	18	261
657	0.0007606	10	146	22	282
658	0.0007245	17	146	27	275
659	0.0007232	14	133	17	252
660	0.0007798	24	161	22	298
661	0.0007314	21	116	16	211
662	0.0007192	16	155	21	294
663	0.0007629	16	156	29	296
664	0.0004984	13	122	15	231
665	0.0007349	21	142	24	263
666	0.0005708	10	155	22	300
667	0.0007483	15	104	16	193
668	0.0007892	8	139	14	270
669	0.0007349	8	149	17	290
670	0.0007263	25	145	19	265
671	0.0004888	7	130	19	253
672	0.0007518	50	148	18	246
673	0.0007591	16	143	16	270
674	0.0006629	34	136	19	238
675	0.0005797	9	129	17	249
676	0.0007572	25	129	20	233
677	0.0007706	17	164	21	311
678	0.0007372	13	130	18	247
679	0.0005618	1	126	17	251
680	0.0005944	11	137	16	263
681	0.0009352	23	124	19	225
682	0.0007731	27	152	18	277
683	0.0005179	5	132	16	259
684	0.0005009	15	126	12	237
685	0.0005011	7	114	15	221
686	0.0007288	10	136	15	262
687	0.0005697	2	120	24	238
688	0.000595	6	131	23	256
689	0.0007164	3	129	29	255
690	0.0005852	2	125	20	248
691	0.0007617	44	153	21	262
692	0.0007472	12	145	18	278
693	0.0006072	7	139	21	271
694	0.0007489	55	166	25	277
695	0.0007567	47	154	16	261
696	0.000581	13	141	29	269
697	0.0007899	9	153	19	297
698	0.0007634	9	144	22	279
699	0.0007708	21	166	18	311
700	0.000736	47	144	16	241
701	0.0007388	25	131	27	237
702	0.0007706	20	132	23	244
703	0.0005107	19	130	15	241
704	0.0007509	29	159	16	289
705	0.0005551	0	143	20	286
706	0.0007285	38	140	19	242
707	0.0007623	12	140	23	268
708	0.000497	14	148	19	282
709	0.0007337	43	127	28	211
710	0.0006426	16	138	28	260
711	0.000778	7	148	23	289
712	0.0007793	9	133	15	257
713	0.0004961	7	138	18	269
714	0.0007301	27	153	22	279
715	0.0007582	26	149	18	272
716	0.0007486	61	166	21	271
717	0.0007435	22	136	17	250
718	0.0007771	11	168	28	325
719	0.0007453	32	163	18	294
720	0.0007416	17	151	20	285
721	0.0006452	7	121	18	235
722	0.0007936	14	120	19	226
723	0.0008537	17	148	23	279
724	0.0006481	10	129	19	248
725	0.0004611	2	125	16	248
726	0.0007751	21	148	15	275
727	0.0007694	7	121	17	235
728	0.0005221	4	133	21	262
729	0.0006079	17	140	15	263
730	0.0007767	27	153	26	279
731	0.0007274	5	130	26	255
732	0.0007555	10	112	17	214
733	0.0005308	3	137	14	271
734	0.0007269	25	138	22	251
735	0.0007358	30	139	16	248
736	0.0007434	26	138	27	250
737	0.0007511	8	152	27	296
738	0.0007503	31	136	22	241
739	0.0007301	15	149	17	283
740	0.0004638	7	123	20	239
741	0.0009116	56	155	18	254
742	0.000491	1	118	19	235
743	0.0004654	3	145	18	287
744	0.0007635	76	181	23	286
745	0.0006672	8	118	24	228
746	0.000539	13	115	19	217
747	0.0007455	11	132	25	253
748	0.0006119	11	136	22	261
749	0.0007416	20	141	21	262
750	0.0006027	18	134	19	250
751	0.000767	13	155	19	297
752	0.0007101	17	131	19	245
753	0.0007713	45	153	19	261
754	0.0005188	7	122	17	237
755	0.0005974	23	125	18	227
756	0.0007643	46	163	18	280
757	0.0007616	19	157	25	295
758	0.0004683	1	144	17	287
759	0.0006228	3	156	20	309
760	0.0007512	13	130	20	247
761	0.0005228	6	118	18	230
762	0.0007356	36	143	17	250
763	0.0007625	38	159	26	280
764	0.0008753	35	151	19	267
765	0.0006403	4	135	18	266
766	0.0007325	4	123	21	242
767	0.0007236	30	144	18	258
768	0.0009585	33	149	16	265
769	0.000739	14	134	20	254
770	0.00074	60	162	26	264
771	0.0008021	16	129	21	242
772	0.0005596	6	113	16	220
773	0.0007854	46	129	18	212
774	0.0005479	3	123	26	243
775	0.0007128	10	127	21	244
776	0.0007403	32	132	24	232
777	0.0004907	1	138	25	275
778	0.0008294	14	121	26	228
779	0.0009367	8	121	21	234
780	0.0008093	35	149	21	263
781	0.0004981	6	134	21	262
782	0.000781	22	151	24	280
783	0.0005752	9	123	19	237
784	0.0007298	16	129	17	242
785	0.0007434	14	165	21	316
786	0.0005647	5	119	19	233
787	0.0004597	2	117	17	232
788	0.0007376	5	129	19	253
789	0.0006477	3	127	17	251
790	0.0007553	10	122	19	234
791	0.000664	1	139	22	277
792	0.000738	56	148	16	240
793	0.000744	20	155	26	290
794	0.0007424	12	152	23	292
795	0.000775	22	156	19	290
796	0.0007918	18	132	27	246
797	0.0007335	50	167	22	284
798	0.000878	11	133	20	255
799	0.0004753	13	125	21	237
800	0.0007784	28	150	19	272
801	0.0007608	20	145	18	270
802	0.0007501	81	181	24	281
803	0.0007691	55	186	17	317
804	0.0005321	36	153	28	270
805	0.0007566	26	167	21	308
806	0.0006115	25	143	19	261
807	0.0007202	21	141	19	261
808	0.0007227	34	107	21	180
809	0.0008818	21	154	19	287
810	0.0008562	36	158	28	280
811	0.0004831	7	114	17	221
812	0.0007675	24	115	14	206
813	0.0004971	1	126	24	251
814	0.0007317	18	136	13	254
815	0.0005379	4	108	19	212
816	0.0007046	53	157	28	261
817	0.0007268	4	130	29	256
818	0.0005959	5	151	18	297
819	0.0005662	5	135	28	265
820	0.0007622	23	140	19	257
821	0.0008185	21	156	19	291
822	0.0004778	0	115	22	230
823	0.0007423	12	124	16	236
824	0.0005734	1	124	14	247
825	0.0007839	25	153	16	281
826	0.0007551	34	163	23	292
827	0.0005366	8	97	26	186
828	0.000779	25	130	20	235
829	0.0008025	32	136	26	240
830	0.0005663	26	157	28	288
831	0.0010175	14	131	14	248
832	0.0007512	45	141	19	237
833	0.0004681	2	122	13	242
834	0.0007834	42	147	18	252
835	0.0006137	8	113	12	218
836	0.000771	52	173	23	294
837	0.0007953	12	126	18	240
838	0.0007727	17	168	23	319
839	0.0006261	6	152	20	298
840	0.0007336	13	147	24	281
841	0.0007923	13	124	15	235
842	0.0007328	17	128	18	239
843	0.0007938	24	155	18	286
844	0.0007401	7	123	17	239
845	0.0004684	2	148	25	294
846	0.0007839	33	149	14	265
847	0.0007377	23	122	18	221
848	0.0005685	6	118	16	230
849	0.0007385	12	116	21	220
850	0.0008252	22	142	18	262
851	0.0007729	70	177	20	284
852	0.0004818	10	128	21	246
853	0.0008114	26	139	28	252
854	0.0006235	5	137	20	269
855	0.0004901	5	134	21	263
856	0.0005673	3	127	19	251
857	0.0007331	41	130	28	219
858	0.0007579	36	147	23	258
859	0.0006074	2	133	25	264
860	0.0007651	18	133	19	248
861	0.0007584	41	134	14	227
862	0.0007795	15	142	21	269
863	0.000774	27	140	23	253
864	0.0007724	12	153	19	294
865	0.0007473	23	131	16	239
866	0.0004914	4	124	15	244
867	0.0006461	7	153	22	299
868	0.0007703	12	123	17	234
869	0.0007321	22	131	17	240
870	0.0007479	22	146	23	270
871	0.0004536	1	126	16	251
872	0.0005798	45	137	22	229
873	0.0007825	8	133	13	258
874	0.0007843	34	160	26	286
875	0.0007208	10	131	21	252
876	0.0007454	26	157	23	288
877	0.0007673	30	167	25	304
878	0.0006189	8	127	19	246
879	0.0005293	16	131	18	246
880	0.0005802	1	126	19	251
881	0.0006595	8	123	26	238
882	0.0004689	6	130	16	254
883	0.0007136	1	141	28	281
884	0.0005043	5	102	12	199
885	0.0006516	0	136	12	272
886	0.0004949	5	107	23	209
887	0.000624	2	147	22	292
888	0.0007457	38	152	20	266
889	0.0007728	18	137	22	256
890	0.0006243	3	120	19	237
891	0.0007496	23	155	17	287
892	0.0007845	26	140	17	254
893	0.0005933	7	116	16	225
894	0.0007533	39	137	19	235
895	0.0007344	11	132	18	253
896	0.0004412	10	106	15	202
897	0.0005409	0	129	21	258
898	0.0006601	1	137	20	273
899	0.000763	13	141	18	269
900	0.0006251	3	140	21	277
901	0.0007618	15	135	22	255
902	0.0008299	29	143	22	257
903	0.000797	11	116	17	221
904	0.0007538	8	134	24	260
905	0.0004541	4	127	22	250
906	0.0007965	6	138	21	270
907	0.0006322	1	127	22	253
908	0.0007415	31	118	20	205
909	0.0007858	31	158	19	285
910	0.0007819	38	164	21	290
911	0.0007273	15	141	15	267
912	0.0007791	20	138	20	256
913	0.0008467	42	154	16	266
914	0.000758	24	161	20	298
915	0.0005086	3	125	16	247
916	0.000729	35	144	20	253
917	0.0007525	9	132	22	255
918	0.0007854	30	153	16	276
919	0.0007341	18	133	22	248
920	0.0004657	6	116	21	226
921	0.0005651	2	146	18	290
922	0.0006311	4	146	19	288
923	0.0007923	40	161	23	282
924	0.0007412	9	137	23	265
925	0.0006308	14	134	24	254
926	0.0007521	20	140	17	260
927	0.0006074	8	126	22	244
928	0.0007002	3	148	25	293
929	0.0007112	5	149	17	293
930	0.0005775	8	138	17	268
931	0.000579	3	133	19	263
932	0.000587	10	143	18	276
933	0.0005504	2	130	13	258
934	0.0006287	7	123	21	239
935	0.0010277	13	149	26	285
936	0.0007142	13	117	16	221
937	0.000756	15	134	17	253
938	0.00079	66	171	20	276
939	0.0007449	13	157	22	301
940	0.0007596	14	147	22	280
941	0.0007342	38	172	22	306
942	0.0007358	9	131	20	253
943	0.0007419	19	124	18	229
944	0.0006432	1	129	24	257
945	0.0007835	12	135	21	258
946	0.0005576	2	113	18	224
947	0.0007384	39	136	24	233
948	0.0007759	12	128	19	244
949	0.000761	15	129	19	243
950	0.0007917	14	146	18	278
951	0.0008255	16	135	25	254
952	0.0008192	15	136	15	257
953	0.0007491	10	155	19	300
954	0.0007638	16	151	23	286
955	0.0007592	34	142	14	250
956	0.0005772	27	164	25	301
957	0.000846	28	117	17	206
958	0.0007763	54	141	17	228
959	0.0007629	19	163	23	307
960	0.0004826	3	109	16	215
961	0.0007255	20	165	27	310
962	0.0005787	11	117	16	223
963	0.0007491	7	155	20	303
964	0.0007621	60	165	25	270
965	0.0004324	4	108	12	212
966	0.0006207	6	130	21	254
967	0.0007813	17	152	26	287
968	0.0007528	14	141	19	268
969	0.0007636	20	132	16	244
970	0.0007756	0	137	27	274
971	0.0007647	21	143	16	265
972	0.0007914	55	151	15	247
973	0.0004456	17	127	18	237
974	0.0007425	17	138	16	259
975	0.0007317	36	132	21	228
976	0.0007521	21	140	20	259
977	0.0007723	56	175	28	294
978	0.0007472	18	134	20	250
979	0.0007194	6	122	18	238
980	0.0006718	18	151	18	284
981	0.0005495	14	133	16	252
982	0.0007613	19	128	17	237
983	0.0007515	13	133	23	253
984	0.0008258	41	153	18	265
985	0.0008019	12	149	24	286
986	0.0006257	11	134	18	257
987	0.0007679	20	143	17	266
988	0.0006271	6	146	22	286
989	0.0004903	1	120	15	239
990	0.0007427	14	130	21	246
991	0.0006279	3	133	28	263
992	0.0007505	21	137	20	253
993	0.0007476	32	154	18	276
994	0.0007483	31	140	22	249
995	0.0007297	57	136	13	215
996	0.000581	4	139	19	274
997	0.0006319	2	134	17	266
998	0.0005159	6	108	15	210
999	0.0005364	2	134	15	266
mean	0.000695961	18.454	138.387	19.898	258.32

## Sheet: PowerBalance_Bal
	time	SEq	Bal	Reg	Egal
0	0.0007769	36	149	17	262
1	0.0007479	17	148	18	279
2	0.0007461	10	116	18	222
3	0.0005047	6	119	16	232
4	0.0009428	32	162	15	292
5	0.0007364	38	127	16	216
6	0.000514	4	140	24	276
7	0.0004494	1	98	17	195
8	0.0007495	37	137	20	237
9	0.0005263	10	128	18	246
10	0.0007595	26	141	18	256
11	0.000756	16	145	21	274
12	0.0005653	14	141	18	268
13	0.0007316	16	149	22	282
14	0.0006379	11	131	21	251
15	0.0007054	51	165	19	279
16	0.0007627	19	149	19	279
17	0.0007026	6	138	27	270
18	0.0005459	1	138	21	275
19	0.000567	0	133	19	266
20	0.0006134	0	140	22	280
21	0.0004513	5	128	17	251
22	0.0007278	20	122	18	224
23	0.000782	52	160	18	268
24	0.0008686	2	136	19	270
25	0.0004954	3	119	13	235
26	0.0007718	21	129	16	237
27	0.0004625	5	114	14	223
28	0.0005	14	125	25	236
29	0.0007425	25	148	20	271
30	0.0007326	7	125	18	243
31	0.0007542	13	142	15	271
32	0.0007784	12	136	21	260
33	0.0006786	5	124	15	243
34	0.0007664	9	131	17	253
35	0.0007468	36	150	20	264
36	0.0007358	26	129	21	232
37	0.0007603	13	134	25	255
38	0.0007505	20	124	17	228
39	0.0007516	61	161	25	261
40	0.0008027	18	146	16	274
41	0.000784	11	134	18	257
42	0.0007927	23	113	12	203
43	0.0005607	13	145	21	277
44	0.0005703	20	132	29	244
45	0.0005829	7	128	16	249
46	0.0007701	5	132	15	259
47	0.0007548	22	143	17	264
48	0.0007718	23	150	29	277
49	0.0007474	17	137	16	257
50	0.0007408	18	121	15	224
51	0.0006016	22	131	17	240
52	0.0008102	23	153	18	283
53	0.0007554	30	153	22	276
54	0.0007378	20	119	21	218
55	0.0007444	45	148	18	251
56	0.0007544	15	118	17	221
57	0.0007349	14	138	21	262
58	0.0007172	24	151	29	278
59	0.0007253	35	136	19	237
60	0.0007592	29	130	18	231
61	0.000519	13	141	17	269
62	0.0007466	12	132	18	252
63	0.0007415	23	149	17	275
64	0.0007437	24	130	19	236
65	0.0007692	22	144	16	266
66	0.0005587	10	132	18	254
67	0.0008292	37	150	17	263
68	0.0007473	16	129	22	242
69	0.0007794	44	154	22	264
70	0.0007098	18	135	19	252
71	0.0007484	31	140	27	249
72	0.0007848	20	126	20	232
73	0.0005141	5	131	17	257
74	0.0007553	23	159	23	295
75	0.0007954	17	140	23	263
76	0.0005958	5	130	18	255
77	0.0005558	7	139	20	271
78	0.0009056	16	161	17	306
79	0.0005816	8	121	21	234
80	0.0007462	18	152	20	286
81	0.0007323	36	143	22	250
82	0.0007409	14	156	16	298
83	0.0007767	28	148	23	268
84	0.0005915	5	114	16	223
85	0.0007782	23	139	23	255
86	0.0005097	46	133	12	220
87	0.0005521	2	115	24	228
88	0.0008296	13	165	24	317
89	0.0007438	13	129	20	245
90	0.0007442	33	150	19	267
91	0.0005172	8	123	19	238
92	0.0007317	24	127	22	230
93	0.0007555	21	138	20	255
94	0.0007899	9	140	17	271
95	0.0007333	41	136	14	231
96	0.0005185	25	139	20	253
97	0.0007988	12	159	27	306
98	0.0007548	39	160	27	281
99	0.0006055	13	137	14	261
100	0.0006158	3	127	19	251
101	0.0007399	13	121	17	229
102	0.0005209	1	111	23	221
103	0.0007476	10	133	21	256
104	0.0005909	2	137	18	272
105	0.0007679	17	159	28	301
106	0.0007442	11	149	18	287
107	0.0007924	42	145	16	248
108	0.0007482	25	135	16	245
109	0.0005021	10	116	13	222
110	0.0007729	16	135	17	254
111	0.0007649	41	139	18	237
112	0.00077	26	147	20	268
113	0.000963	43	154	16	265
114	0.0006055	3	126	22	249
115	0.0007521	37	132	25	227
116	0.0006666	3	127	20	251
117	0.0006462	20	128	16	236
118	0.0007312	37	155	24	273
119	0.0005946	5	123	20	241
120	0.0007611	28	148	18	268
121	0.0004709	10	133	23	256
122	0.0007594	21	112	19	203
123	0.0007575	33	123	19	213
124	0.0007468	16	128	15	240
125	0.0007292	15	134	24	253
126	0.0004598	4	122	23	240
127	0.0005602	8	139	17	270
128	0.000772	32	140	16	248
129	0.0007196	24	138	17	252
130	0.0007125	22	129	18	236
131	0.000708	58	149	18	240
132	0.0005749	7	118	21	229
133	0.000477	5	107	16	209
134	0.0007397	27	132	17	237
135	0.0005653	13	139	20	265
136	0.0007504	19	144	19	269
137	0.0007396	30	144	12	258
138	0.0005228	3	135	19	267
139	0.0007463	47	155	17	263
140	0.0007441	18	141	28	264
141	0.0008332	26	150	17	274
142	0.0007468	15	151	21	287
143	0.0007516	30	168	25	306
144	0.0005905	10	126	21	242
145	0.0007822	26	146	26	266
146	0.0007198	26	131	23	236
147	0.0007505	15	133	17	251
148	0.0005364	15	130	18	245
149	0.0007341	11	148	16	285
150	0.0007222	10	145	23	280
151	0.0007282	37	138	13	239
152	0.0007357	28	144	18	260
153	0.0007162	12	122	18	232
154	0.0007224	2	123	24	244
155	0.0007144	18	137	26	256
156	0.0007403	48	156	23	264
157	0.0007144	5	131	15	257
158	0.0006932	44	143	22	242
159	0.0007784	47	165	21	283
160	0.0007459	1	118	15	235
161	0.0007374	13	164	27	315
162	0.0008973	22	130	14	238
163	0.0005796	13	131	17	249
164	0.0007339	23	135	22	247
165	0.0007269	13	142	20	271
166	0.0005988	11	131	26	251
167	0.0005868	11	129	21	247
168	0.0007489	18	132	19	246
169	0.0007488	16	132	21	248
170	0.0007862	31	124	25	217
171	0.0007407	9	130	17	251
172	0.0007363	29	135	12	241
173	0.0005872	14	131	16	248
174	0.0007384	16	148	23	280
175	0.0007326	35	140	20	245
176	0.0005086	0	132	17	264
177	0.0005367	2	130	16	258
178	0.0005231	1	137	16	273
179	0.0007705	39	152	23	265
180	0.0008054	8	146	16	284
181	0.0008243	15	132	16	249
182	0.0007316	6	131	29	256
183	0.0007866	17	130	20	243
184	0.0008486	45	159	17	273
185	0.000754	58	165	23	272
186	0.0005679	4	147	19	290
187	0.0007992	17	141	24	265
188	0.0007324	8	144	17	280
189	0.0007487	26	154	13	282
190	0.0007341	12	148	14	284
191	0.0007596	28	121	18	214
192	0.0006135	19	149	26	279
193	0.0008062	56	156	20	256
194	0.0007158	6	131	14	256
195	0.000645	1	127	24	253
196	0.0006492	10	139	17	268
197	0.0006033	4	128	16	252
198	0.0007337	44	137	25	230
199	0.0007262	33	168	19	303
200	0.000559	5	139	22	273
201	0.000741	26	152	25	278
202	0.000741	14	160	24	306
203	0.0007749	41	163	18	285
204	0.0007787	7	125	16	243
205	0.000809	22	146	18	270
206	0.0004466	5	108	13	211
207	0.00076	20	134	15	248
208	0.0007638	16	138	20	260
209	0.0007142	23	117	13	211
210	0.0008763	23	149	20	275
211	0.0007527	51	186	27	321
212	0.000581	11	134	16	257
213	0.0004744	9	116	17	223
214	0.0006527	12	133	20	254
215	0.0007538	20	135	17	250
216	0.0007388	6	130	27	254
217	0.000506	13	125	24	237
218	0.0007942	14	139	18	264
219	0.0008352	55	153	22	251
220	0.000542	5	133	17	261
221	0.0007942	9	143	16	277
222	0.0007955	32	144	26	256
223	0.0005404	5	146	17	287
224	0.0008464	15	131	21	247
225	0.000587	10	131	19	252
226	0.0008695	20	149	20	278
227	0.0011851	12	145	18	278
228	0.0007542	21	155	24	289
229	0.0004813	5	136	20	267
230	0.000807	30	150	21	270
231	0.000757	22	136	17	250
232	0.0007656	16	151	22	286
233	0.0005628	10	142	21	274
234	0.0007481	11	121	17	231
235	0.0007383	14	124	19	234
236	0.000741	22	139	23	256
237	0.0007897	18	166	17	314
238	0.0007472	22	145	26	268
239	0.0004803	4	132	18	260
240	0.0005384	8	133	21	258
241	0.0007633	39	147	28	255
242	0.0007503	13	149	15	285
243	0.0005947	19	125	20	231
244	0.0007494	52	167	20	282
245	0.0005585	7	125	18	243
246	0.0008123	25	172	22	319
247	0.0007405	25	142	15	259
248	0.0007393	18	141	28	264
249	0.0005771	4	148	27	292
250	0.0008043	7	126	27	245
251	0.0007599	9	128	17	247
252	0.0007372	5	144	22	283
253	0.0007312	29	141	17	253
254	0.0005786	12	140	17	268
255	0.0007622	6	148	21	290
256	0.0007835	19	155	15	291
257	0.0007382	12	127	24	242
258	0.0007716	20	122	21	224
259	0.0007717	24	133	19	242
260	0.0008089	42	175	17	308
261	0.000779	31	147	18	263
262	0.0007114	21	122	15	223
263	0.0004532	0	129	22	258
264	0.000497	22	125	25	228
265	0.0006182	6	142	17	278
266	0.0007445	35	161	20	287
267	0.0006058	2	129	24	256
268	0.0007675	30	139	17	248
269	0.0007937	91	173	17	255
270	0.0005876	0	138	18	276
271	0.0009185	7	156	18	305
272	0.0007684	23	140	23	257
273	0.0007505	20	141	19	262
274	0.0007219	18	137	18	256
275	0.0005518	16	134	15	252
276	0.0007739	23	140	18	257
277	0.0004782	6	116	20	226
278	0.0006074	13	115	15	217
279	0.0007382	25	157	20	289
280	0.0004678	1	111	16	221
281	0.001313	10	154	23	298
282	0.0005992	5	135	17	265
283	0.0007896	44	155	18	266
284	0.0007576	19	130	17	241
285	0.0007464	15	158	14	301
286	0.0006219	3	122	14	241
287	0.0007625	33	157	15	281
288	0.0007625	47	154	23	261
289	0.0007542	18	157	17	296
290	0.0006209	3	143	18	283
291	0.0007857	36	146	25	256
292	0.0008266	39	135	19	231
293	0.0007316	13	137	14	261
294	0.0007594	28	147	22	266
295	0.0005357	5	134	15	263
296	0.0007388	9	142	22	275
297	0.000906	15	149	19	283
298	0.0004928	3	135	22	267
299	0.0005967	5	144	21	283
300	0.000434	2	126	17	250
301	0.0008338	55	158	21	261
302	0.0006826	3	141	24	279
303	0.000542	3	128	18	253
304	0.0007606	9	132	20	255
305	0.0007981	22	110	13	198
306	0.0005182	8	113	15	218
307	0.0007209	32	154	17	276
308	0.0004186	7	111	16	215
309	0.0007712	0	130	22	260
310	0.0007199	50	142	20	234
311	0.0005948	12	129	15	246
312	0.0007385	13	138	23	263
313	0.0007466	15	138	26	261
314	0.0007236	60	140	19	220
315	0.0007455	12	118	15	224
316	0.0006102	41	135	16	229
317	0.0006301	8	115	20	222
318	0.0007174	11	121	15	231
319	0.0006136	9	136	18	263
320	0.0004585	2	115	18	228
321	0.0007247	13	121	22	229
322	0.0007122	19	130	25	241
323	0.0007368	29	142	22	255
324	0.0004904	1	122	23	243
325	0.0007729	15	149	25	283
326	0.0005237	2	132	17	262
327	0.0007733	20	128	16	236
328	0.0005771	5	151	20	297
329	0.0005986	5	124	19	243
330	0.0006033	12	144	18	276
331	0.0005316	1	132	18	263
332	0.0008647	25	135	14	245
333	0.000738	21	116	27	211
334	0.0007815	23	149	18	275
335	0.0005557	14	133	19	252
336	0.0007588	23	156	17	289
337	0.0007798	35	123	21	211
338	0.0005917	14	145	27	276
339	0.0006158	1	133	22	265
340	0.0007592	49	146	15	243
341	0.0007402	62	165	19	268
342	0.0008869	17	132	15	247
343	0.0004854	9	113	13	217
344	0.0008672	64	159	25	254
345	0.0007595	17	122	16	227
346	0.0007452	6	149	19	292
347	0.0007409	57	182	22	307
348	0.0007513	39	157	19	275
349	0.0007266	23	140	19	257
350	0.00075	19	132	21	245
351	0.0005517	15	124	17	233
352	0.0004605	12	127	14	242
353	0.0007648	33	136	25	239
354	0.0007426	27	149	23	271
355	0.0005594	5	139	23	273
356	0.000467	2	114	22	226
357	0.0005151	0	124	14	248
358	0.0007608	16	127	22	238
359	0.0007435	67	159	21	251
360	0.0005113	20	134	16	248
361	0.0004919	3	123	17	243
362	0.0008463	12	123	21	234
363	0.000754	28	142	23	256
364	0.0005391	6	126	17	246
365	0.0007317	6	130	14	254
366	0.00076	22	126	16	230
367	0.0007366	27	131	18	235
368	0.0007472	17	141	22	265
369	0.000748	8	141	20	274
370	0.0008488	21	145	18	269
371	0.0007231	18	132	19	246
372	0.0007676	33	153	17	273
373	0.0007732	20	132	27	244
374	0.0006823	9	118	13	227
375	0.0009461	7	134	15	261
376	0.0005981	11	121	22	231
377	0.0005914	18	142	22	266
378	0.0006454	13	141	18	269
379	0.0007183	18	127	16	236
380	0.0007386	63	176	23	289
381	0.0006585	2	157	22	312
382	0.0007245	8	157	21	306
383	0.0006078	10	142	20	274
384	0.0007452	44	157	26	270
385	0.0007762	71	167	21	263
386	0.0007393	18	122	26	226
387	0.0005341	5	135	20	265
388	0.0007277	8	123	20	238
389	0.0007718	48	162	25	276
390	0.0006699	4	152	17	300
391	0.0007238	47	133	13	219
392	0.0008672	9	130	21	251
393	0.0007391	18	124	25	230
394	0.000547	3	117	15	231
395	0.0006683	12	140	17	268
396	0.000493	7	129	18	251
397	0.000546	3	126	16	249
398	0.0007886	23	154	26	285
399	0.0005025	2	149	25	296
400	0.0007599	28	142	16	256
401	0.0008212	17	148	23	279
402	0.0008615	16	162	23	308
403	0.0007434	23	154	24	285
404	0.0006787	1	135	18	269
405	0.0006244	11	153	19	295
406	0.0008148	12	139	21	266
407	0.0007501	18	142	21	266
408	0.0006359	12	128	21	244
409	0.0004863	18	130	20	242
410	0.0007382	13	130	26	247
411	0.0007508	21	119	16	217
412	0.0007237	9	130	17	251
413	0.0009117	48	159	21	270
414	0.0004414	8	135	15	262
415	0.0008201	15	119	17	223
416	0.0004763	1	127	15	253
417	0.0006034	6	137	22	268
418	0.0004626	9	126	17	243
419	0.0007352	20	128	25	236
420	0.0005689	5	126	17	247
421	0.0007398	7	135	17	263
422	0.0005238	13	114	15	215
423	0.0005511	10	133	15	256
424	0.0007956	12	161	19	310
425	0.0007242	12	137	24	262
426	0.0007314	20	156	27	292
427	0.0007608	30	136	28	242
428	0.0007518	37	144	13	251
429	0.0007349	47	146	24	245
430	0.0006862	8	138	23	268
431	0.0007918	32	131	15	230
432	0.0007761	40	138	14	236
433	0.0007552	9	132	21	255
434	0.0007608	18	150	19	282
435	0.0007478	42	154	20	266
436	0.0007294	20	129	23	238
437	0.0007388	40	139	18	238
438	0.000668	1	151	19	301
439	0.0007567	38	173	29	308
440	0.0007521	13	151	22	289
441	0.0007779	15	157	20	299
442	0.0007371	28	151	18	274
443	0.0007301	6	153	19	300
444	0.0007827	78	157	18	236
445	0.0008114	33	146	14	259
446	0.0007715	19	132	18	245
447	0.0007312	33	146	17	259
448	0.0007303	18	129	20	240
449	0.000754	22	160	21	298
450	0.0005928	6	129	29	252
451	0.0006262	20	143	15	266
452	0.0007639	46	160	17	274
453	0.000841	44	152	22	260
454	0.0007304	14	132	13	250
455	0.0007635	33	147	18	261
456	0.0008093	13	134	14	255
457	0.0004633	1	133	20	265
458	0.0005622	3	145	26	287
459	0.000778	24	146	24	268
460	0.0005415	16	127	16	238
461	0.0004696	4	121	17	238
462	0.0007524	50	148	15	246
463	0.0007352	19	135	29	251
464	0.0005541	0	127	19	254
465	0.0006094	2	126	29	250
466	0.000631	4	137	23	270
467	0.0008095	30	135	17	240
468	0.0007556	10	128	22	246
469	0.0007628	12	148	21	284
470	0.0007542	24	137	16	250
471	0.0006129	2	128	20	254
472	0.0007683	19	160	23	301
473	0.000771	19	134	19	249
474	0.0007443	4	133	21	262
475	0.000767	12	148	24	284
476	0.0004588	4	124	22	244
477	0.0007547	31	156	16	281
478	0.0005777	3	134	23	265
479	0.0007454	5	123	26	241
480	0.000531	3	129	21	255
481	0.0005859	10	132	15	254
482	0.0007243	15	139	21	263
483	0.0007315	20	157	17	294
484	0.0007547	13	128	16	243
485	0.0007484	47	158	23	269
486	0.0007192	12	131	24	250
487	0.0007523	47	157	17	267
488	0.0007327	24	116	23	208
489	0.0007364	24	148	23	272
490	0.000728	28	159	21	290
491	0.0006388	17	137	23	257
492	0.0007779	81	172	15	263
493	0.0007234	12	134	18	256
494	0.0008071	17	127	17	237
495	0.0006287	1	130	26	259
496	0.0007291	16	150	17	284
497	0.0007214	8	124	18	240
498	0.0007139	22	138	17	254
499	0.000591	13	135	27	257
500	0.0005142	29	119	20	209
501	0.0004101	3	94	14	185
502	0.0007832	68	164	24	260
503	0.00082	6	138	23	270
504	0.0005935	5	133	19	261
505	0.0007449	16	140	20	264
506	0.0005856	29	148	19	267
507	0.0005829	0	142	18	284
508	0.0007615	53	178	19	303
509	0.0005178	21	125	17	229
510	0.0007519	30	159	18	288
511	0.0005136	8	135	22	262
512	0.0007335	36	173	28	310
513	0.000746	27	155	18	283
514	0.0007285	16	126	19	236
515	0.0007491	24	155	17	286
516	0.0005822	3	120	19	237
517	0.0005118	0	115	13	230
518	0.0009005	48	147	24	246
519	0.0006002	41	160	25	279
520	0.0004671	4	117	17	230
521	0.0007662	8	124	15	240
522	0.0005347	24	127	17	230
523	0.0006118	2	118	27	234
524	0.0005806	4	117	15	230
525	0.0007594	32	129	16	226
526	0.0005237	4	109	19	214
527	0.0007716	7	132	17	257
528	0.0005674	73	164	18	255
529	0.0005892	5	146	19	287
530	0.0005489	11	148	17	285
531	0.0007579	8	138	25	268
532	0.0007279	18	125	16	232
533	0.0006063	0	127	19	254
534	0.0005454	4	135	21	266
535	0.0008317	79	165	18	251
536	0.0010891	43	140	21	237
537	0.0007581	24	142	16	260
538	0.0007645	11	126	24	241
539	0.0005141	10	117	17	224
540	0.0005482	9	124	13	239
541	0.0005847	1	120	19	239
542	0.000757	24	139	19	254
543	0.0005344	5	129	21	253
544	0.0007331	41	139	21	237
545	0.0007549	9	149	13	289
546	0.000775	17	159	21	301
547	0.0007385	39	133	16	227
548	0.0007715	20	135	18	250
549	0.0004587	3	118	16	233
550	0.0007374	27	126	19	225
551	0.0007594	46	163	26	280
552	0.000559	5	137	19	269
553	0.0006145	11	123	18	235
554	0.0008048	17	132	15	247
555	0.0008086	13	145	24	277
556	0.0006067	3	134	21	265
557	0.0005761	33	128	19	223
558	0.0007747	22	164	20	306
559	0.0007604	15	122	13	229
560	0.0006434	3	146	26	289
561	0.0007407	32	146	22	260
562	0.0005583	9	127	24	245
563	0.0007176	0	140	26	280
564	0.0007563	42	150	28	258
565	0.0007317	16	112	19	208
566	0.0007491	10	135	13	260
567	0.000759	28	109	23	190
568	0.0007533	9	127	14	245
569	0.0007241	30	164	22	298
570	0.0005345	1	130	17	259
571	0.0007357	23	121	16	219
572	0.0007372	29	151	20	273
573	0.00076	46	168	25	290
574	0.0004782	6	136	20	266
575	0.0007062	6	128	19	250
576	0.00078	9	136	20	263
577	0.0005709	0	121	19	242
578	0.0007666	5	133	21	261
579	0.0005614	8	134	20	260
580	0.000712	21	123	18	225
581	0.0007847	16	157	20	298
582	0.0007327	17	138	18	259
583	0.0005434	3	123	17	243
584	0.0007518	7	129	16	251
585	0.000622	13	126	27	239
586	0.0007381	58	175	20	292
587	0.0005002	16	128	13	240
588	0.0007192	10	129	26	248
589	0.00074	20	132	23	244
590	0.0007476	50	142	20	234
591	0.0010337	44	140	21	236
592	0.000763	20	136	24	252
593	0.0006083	4	122	16	240
594	0.0004519	15	120	18	225
595	0.0007206	10	154	25	298
596	0.0007497	53	169	26	285
597	0.0004944	4	138	16	272
598	0.0007042	48	155	26	262
599	0.0008387	44	146	24	248
600	0.0007077	15	139	21	263
601	0.0007262	29	163	27	297
602	0.0007577	40	142	20	244
603	0.0007563	29	161	20	293
604	0.000732	28	127	23	226
605	0.0004513	15	128	17	241
606	0.0006176	12	141	19	270
607	0.000596	11	146	18	281
608	0.0007608	33	152	20	271
609	0.0007693	12	140	22	268
610	0.0005783	3	127	26	251
611	0.0005714	3	125	16	247
612	0.0004438	7	120	18	233
613	0.0007392	32	147	16	262
614	0.0008061	23	136	28	249
615	0.0007614	31	154	23	277
616	0.0007379	15	135	23	255
617	0.0005912	2	128	17	254
618	0.0007353	29	154	28	279
619	0.0007312	13	113	17	213
620	0.0007562	57	164	17	271
621	0.0008445	74	158	28	242
622	0.0007382	13	126	24	239
623	0.0007631	12	123	19	234
624	0.0007617	34	143	26	252
625	0.0007607	39	123	19	207
626	0.0005973	1	147	20	293
627	0.0006332	1	124	16	247
628	0.0006168	9	124	19	239
629	0.000659	9	121	17	233
630	0.0005593	18	126	24	234
631	0.0006279	10	113	19	216
632	0.0006393	16	147	20	278
633	0.0006372	13	120	14	227
634	0.0007624	84	184	22	284
635	0.0008296	20	152	17	284
636	0.0005745	20	126	20	232
637	0.0008598	20	145	19	270
638	0.0007359	38	123	18	208
639	0.0007684	6	123	21	240
640	0.0007093	4	120	17	236
641	0.0007723	23	155	23	287
642	0.000662	5	134	28	263
643	0.0007223	12	119	22	226
644	0.0009277	30	127	21	224
645	0.0008056	44	142	23	240
646	0.0005388	4	135	21	266
647	0.0007235	12	123	21	234
648	0.0007488	2	119	16	236
649	0.0007623	18	145	18	272
650	0.0008244	15	165	18	315
651	0.0007838	19	154	23	289
652	0.000764	7	123	18	239
653	0.0007267	10	128	21	246
654	0.0005877	6	145	21	284
655	0.0008395	65	182	19	299
656	0.0008228	25	143	18	261
657	0.0007946	10	146	22	282
658	0.0007744	17	146	27	275
659	0.0007312	14	133	17	252
660	0.0007672	24	161	22	298
661	0.0007796	21	116	16	211
662	0.0007101	16	155	21	294
663	0.0007252	17	148	17	279
664	0.0004508	13	122	15	231
665	0.0007256	56	138	23	220
666	0.0006435	10	155	22	300
667	0.0007369	15	104	16	193
668	0.0007702	8	139	14	270
669	0.000624	8	149	17	290
670	0.0007464	33	144	24	255
671	0.0005208	7	130	19	253
672	0.0007395	50	148	18	246
673	0.0007336	16	143	16	270
674	0.0006449	34	136	19	238
675	0.0006875	9	129	17	249
676	0.0007457	25	129	20	233
677	0.0007557	28	154	19	280
678	0.0007799	13	130	18	247
679	0.0004942	1	126	17	251
680	0.0005493	11	137	16	263
681	0.0008562	23	124	19	225
682	0.0007474	47	159	18	271
683	0.0006174	5	132	16	259
684	0.000539	15	126	12	237
685	0.0005119	7	114	15	221
686	0.0007083	10	136	15	262
687	0.0005639	2	120	24	238
688	0.0006192	6	131	23	256
689	0.0007982	3	129	29	255
690	0.0006165	2	125	20	248
691	0.0007624	44	153	21	262
692	0.0007595	37	144	18	251
693	0.0005961	7	139	21	271
694	0.0008019	55	166	25	277
695	0.0007527	47	154	16	261
696	0.0006885	13	141	29	269
697	0.0007677	9	153	19	297
698	0.0007471	9	144	22	279
699	0.0007579	21	166	18	311
700	0.0007648	49	141	16	233
701	0.0007329	25	131	27	237
702	0.0007737	20	132	23	244
703	0.0008722	19	130	15	241
704	0.0007649	34	156	23	278
705	0.000533	0	143	20	286
706	0.0007512	38	140	19	242
707	0.0007264	24	133	17	242
708	0.0005119	14	148	19	282
709	0.0007132	43	127	28	211
710	0.0005897	16	138	28	260
711	0.0006523	7	148	23	289
712	0.0008128	9	133	15	257
713	0.000512	7	138	18	269
714	0.0007882	27	153	22	279
715	0.0007553	26	149	18	272
716	0.0007833	61	166	21	271
717	0.000752	22	136	17	250
718	0.000767	11	168	28	325
719	0.0007882	32	163	18	294
720	0.0007455	17	151	20	285
721	0.0007216	7	121	18	235
722	0.0007442	14	120	19	226
723	0.0008162	17	148	23	279
724	0.0006254	10	129	19	248
725	0.0004538	2	125	16	248
726	0.0007561	21	148	15	275
727	0.0007701	7	121	17	235
728	0.0005073	4	133	21	262
729	0.0005693	17	140	15	263
730	0.0007581	27	153	26	279
731	0.0007665	5	130	26	255
732	0.000773	10	112	17	214
733	0.0004706	3	137	14	271
734	0.0006396	25	138	22	251
735	0.0007716	30	139	16	248
736	0.0007127	26	138	27	250
737	0.0007552	8	152	27	296
738	0.0007531	31	136	22	241
739	0.0007416	15	149	17	283
740	0.0004927	7	123	20	239
741	0.0009337	56	155	18	254
742	0.0004918	1	118	19	235
743	0.0004534	3	145	18	287
744	0.0007747	76	181	23	286
745	0.0006531	8	118	24	228
746	0.0005586	13	115	19	217
747	0.0007262	11	132	25	253
748	0.0005854	11	136	22	261
749	0.0008242	20	141	21	262
750	0.0005729	18	134	19	250
751	0.0007485	13	155	19	297
752	0.0008784	17	131	19	245
753	0.0007944	45	153	19	261
754	0.0005609	7	122	17	237
755	0.0005821	23	125	18	227
756	0.0007599	49	152	18	255
757	0.0007317	19	157	25	295
758	0.0004952	1	144	17	287
759	0.0006113	3	156	20	309
760	0.0008033	13	130	20	247
761	0.0005225	6	118	18	230
762	0.0007091	36	143	17	250
763	0.0008205	39	150	23	261
764	0.0007511	35	151	19	267
765	0.0007445	38	152	23	266
766	0.0007646	4	123	21	242
767	0.0008672	30	144	18	258
768	0.0008458	33	149	16	265
769	0.0007514	14	134	20	254
770	0.0008072	60	162	26	264
771	0.0007398	16	129	21	242
772	0.0006051	6	113	16	220
773	0.000742	46	129	18	212
774	0.0004899	3	123	26	243
775	0.0007499	10	127	21	244
776	0.0007651	32	132	24	232
777	0.0004987	1	138	25	275
778	0.0007185	14	121	26	228
779	0.0008017	8	121	21	234
780	0.0007354	39	148	21	257
781	0.0005287	6	134	21	262
782	0.0007649	22	151	24	280
783	0.0005893	9	123	19	237
784	0.0007932	16	129	17	242
785	0.0007482	14	165	21	316
786	0.0005401	5	119	19	233
787	0.0007716	11	123	20	235
788	0.0006468	5	129	19	253
789	0.0005229	3	127	17	251
790	0.0007667	10	122	19	234
791	0.0006366	1	139	22	277
792	0.000739	56	148	16	240
793	0.0008371	20	155	26	290
794	0.0007617	39	147	18	255
795	0.0007625	25	150	19	275
796	0.000749	18	132	27	246
797	0.0007586	50	167	22	284
798	0.0007223	11	133	20	255
799	0.0004514	13	125	21	237
800	0.0007283	28	150	19	272
801	0.000749	20	145	18	270
802	0.0007447	81	181	24	281
803	0.0007631	55	186	17	317
804	0.0005435	36	153	28	270
805	0.0008199	26	167	21	308
806	0.0007832	25	143	19	261
807	0.0008922	21	141	19	261
808	0.0007902	34	107	21	180
809	0.0007218	21	154	19	287
810	0.000737	36	158	28	280
811	0.0004671	7	114	17	221
812	0.000723	24	115	14	206
813	0.0005378	1	126	24	251
814	0.0007262	18	136	13	254
815	0.0004228	4	108	19	212
816	0.00073	53	157	28	261
817	0.0009543	4	130	29	256
818	0.000634	5	151	18	297
819	0.0005766	5	135	28	265
820	0.0007683	23	140	19	257
821	0.0007633	21	156	19	291
822	0.0005064	0	115	22	230
823	0.0007305	12	124	16	236
824	0.000562	1	124	14	247
825	0.0007536	25	153	16	281
826	0.0007876	34	163	23	292
827	0.0006213	8	97	26	186
828	0.0008249	25	130	20	235
829	0.0008193	32	136	26	240
830	0.0005925	26	157	28	288
831	0.0007452	14	131	14	248
832	0.0007246	45	141	19	237
833	0.0005451	2	122	13	242
834	0.0008225	11	126	18	241
835	0.0004741	8	113	12	218
836	0.0008582	52	173	23	294
837	0.0006281	12	126	18	240
838	0.0007824	17	168	23	319
839	0.0006209	6	152	20	298
840	0.00074	13	147	24	281
841	0.0007288	13	124	15	235
842	0.000789	17	128	18	239
843	0.0007509	27	150	17	273
844	0.000715	8	120	17	232
845	0.0004616	2	148	25	294
846	0.0007841	34	148	14	262
847	0.0008764	23	122	18	221
848	0.0005568	6	118	16	230
849	0.0007439	12	116	21	220
850	0.0007724	22	142	18	262
851	0.0007949	70	177	20	284
852	0.0005077	10	128	21	246
853	0.0007563	26	139	28	252
854	0.0006438	5	137	20	269
855	0.0005082	5	134	21	263
856	0.00054	3	127	19	251
857	0.0007468	42	117	19	192
858	0.000762	36	147	23	258
859	0.0006759	2	133	25	264
860	0.000828	18	133	19	248
861	0.0007538	41	134	14	227
862	0.0007364	25	139	17	253
863	0.0007592	27	140	23	253
864	0.0007588	12	153	19	294
865	0.0007544	23	131	16	239
866	0.0005061	4	124	15	244
867	0.0006797	7	153	22	299
868	0.0007782	12	123	17	234
869	0.0007912	22	131	17	240
870	0.0007487	22	146	23	270
871	0.0004455	1	126	16	251
872	0.0005931	45	137	22	229
873	0.000538	8	133	13	258
874	0.0007741	80	160	25	240
875	0.0007249	10	131	21	252
876	0.0007526	40	149	15	258
877	0.0007667	30	167	25	304
878	0.0007843	8	127	19	246
879	0.0005343	16	131	18	246
880	0.0005402	1	126	19	251
881	0.0006147	8	123	26	238
882	0.0005844	6	130	16	254
883	0.0005855	1	141	28	281
884	0.0005445	5	102	12	199
885	0.0005832	0	136	12	272
886	0.000489	5	107	23	209
887	0.0006123	2	147	22	292
888	0.0007384	38	152	20	266
889	0.0007976	18	137	22	256
890	0.0004857	3	120	19	237
891	0.0007493	23	155	17	287
892	0.0007713	26	140	17	254
893	0.0005866	7	116	16	225
894	0.0007286	47	135	15	223
895	0.0007106	11	132	18	253
896	0.0004385	10	106	15	202
897	0.0004778	0	129	21	258
898	0.0006094	1	137	20	273
899	0.0007378	13	141	18	269
900	0.0006084	3	140	21	277
901	0.0009059	15	135	22	255
902	0.0007368	37	134	17	231
903	0.00072	11	116	17	221
904	0.000747	8	134	24	260
905	0.0004691	4	127	22	250
906	0.0007443	6	138	21	270
907	0.000558	1	127	22	253
908	0.0007652	31	118	20	205
909	0.0007273	31	158	19	285
910	0.0007927	38	164	21	290
911	0.0007458	24	138	15	252
912	0.0007344	20	138	20	256
913	0.0007489	42	154	16	266
914	0.0008206	24	161	20	298
915	0.000484	3	125	16	247
916	0.0008744	35	144	20	253
917	0.0008295	9	132	22	255
918	0.0007659	33	152	25	271
919	0.0007184	18	133	22	248
920	0.000461	6	116	21	226
921	0.0005855	2	146	18	290
922	0.0006354	4	146	19	288
923	0.000845	42	155	16	268
924	0.000719	9	137	23	265
925	0.0006253	14	134	24	254
926	0.0007377	20	140	17	260
927	0.0004714	8	126	22	244
928	0.0007218	3	148	25	293
929	0.0005786	5	149	17	293
930	0.0005501	8	138	17	268
931	0.0005251	3	133	19	263
932	0.0005648	10	143	18	276
933	0.0005671	2	130	13	258
934	0.0006137	7	123	21	239
935	0.0007547	13	149	26	285
936	0.0007184	13	117	16	221
937	0.0007515	15	134	17	253
938	0.0007563	66	171	20	276
939	0.000769	13	157	22	301
940	0.0007867	14	147	22	280
941	0.0007453	38	172	22	306
942	0.0008027	21	126	20	231
943	0.0007562	34	124	14	214
944	0.0006848	1	129	24	257
945	0.0007307	12	135	21	258
946	0.0005542	2	113	18	224
947	0.0007628	39	136	24	233
948	0.0007615	12	128	19	244
949	0.0009068	15	129	19	243
950	0.0007738	14	146	18	278
951	0.0007301	16	135	25	254
952	0.0007471	15	136	15	257
953	0.0007716	10	155	19	300
954	0.0007486	26	146	23	266
955	0.0007702	34	142	14	250
956	0.0005319	27	164	25	301
957	0.0007888	28	117	17	206
958	0.0007176	54	141	17	228
959	0.0007687	19	163	23	307
960	0.0004689	3	109	16	215
961	0.0008019	20	165	27	310
962	0.000594	11	117	16	223
963	0.0008339	7	155	20	303
964	0.000799	60	165	25	270
965	0.0004161	4	108	12	212
966	0.0005837	6	130	21	254
967	0.0007632	17	152	26	287
968	0.0007593	14	141	19	268
969	0.0007402	20	132	16	244
970	0.0007616	0	137	27	274
971	0.0007747	21	143	16	265
972	0.0007682	55	151	15	247
973	0.0007617	17	127	18	237
974	0.0007716	17	138	16	259
975	0.0007772	36	132	21	228
976	0.0007571	21	140	20	259
977	0.0007758	56	175	28	294
978	0.0008315	18	134	20	250
979	0.0008188	6	122	18	238
980	0.0006575	18	151	18	284
981	0.000498	14	133	16	252
982	0.0008526	19	128	17	237
983	0.0007683	13	133	23	253
984	0.0008521	41	153	18	265
985	0.0007569	12	149	24	286
986	0.0006445	11	134	18	257
987	0.0008804	20	143	17	266
988	0.0006429	6	146	22	286
989	0.0004847	1	120	15	239
990	0.0007261	14	130	21	246
991	0.0005609	3	133	28	263
992	0.0008847	21	137	20	253
993	0.0007552	32	154	18	276
994	0.0007661	31	140	22	249
995	0.0007501	57	136	13	215
996	0.0005999	4	139	19	274
997	0.000793	2	134	17	266
998	0.0004854	6	108	15	210
999	0.0004601	2	134	15	266
mean	0.000696088	19.257	138.035	19.713	256.813
